# Supplementary material for: Identification of Latent Oncogenes with a Network Embedding Method and Random Forest
Source: Hindawi journal article supplement (doi:10.1155/2020/5160396), 2020-01-01
Supplement: f1 [file 5160396.f1.pdf]

**Supplementary Material S1.** Level values of candidate oncogenes.

| <b>Ensembl ID</b> | <b>Gene symbol</b> | <b>Level value</b> |
|-------------------|--------------------|--------------------|
| ENSP00000304565   | RAB31              | 0.9105             |
| ENSP00000421799   | ENSG00000257184    | 0.8868             |
| ENSP00000469872   | RAB4B-EGLN2        | 0.8500             |
| ENSP00000283921   | HOXA10             | 0.8289             |
| ENSP00000385586   | HOXD12             | 0.8184             |
| ENSP00000348429   | ACSL5              | 0.8184             |
| ENSP00000256953   | RERG               | 0.8105             |
| ENSP00000341032   | WNT7B              | 0.8053             |
| ENSP00000321805   | RIT2               | 0.7763             |
| ENSP00000285735   | RHOC               | 0.7763             |
| ENSP00000282397   | FLT1               | 0.7763             |
| ENSP00000264711   | DNAJC27            | 0.7737             |
| ENSP00000339787   | ACSL4              | 0.7737             |
| ENSP00000357306   | RIT1               | 0.7684             |
| ENSP00000301068   | RHEBL1             | 0.7684             |
| ENSP00000267996   | TPM1               | 0.7632             |
| ENSP00000354219   | TPM2               | 0.7579             |
| ENSP00000249501   | HOXD10             | 0.7579             |
| ENSP00000249499   | HOXD9              | 0.7553             |
| ENSP00000292408   | FGFR4              | 0.7553             |
| ENSP00000358698   | WNT2B              | 0.7500             |
| ENSP00000369375   | TEK                | 0.7500             |
| ENSP00000313572   | NIM1               | 0.7500             |
| ENSP00000296870   | IL3                | 0.7474             |
| ENSP00000263253   | EP300              | 0.7447             |
| ENSP00000308576   | RHOD               | 0.7395             |
| ENSP00000241463   | RASL11A            | 0.7395             |
| ENSP00000224337   | BLNK               | 0.7368             |
| ENSP00000272369   | MEIS1              | 0.7342             |
| ENSP00000222139   | EPOR               | 0.7342             |
| ENSP00000310036   | CD34               | 0.7342             |
| ENSP00000258873   | ACSBG1             | 0.7342             |
| ENSP00000265441   | WNT2               | 0.7316             |
| ENSP00000325836   | DIRAS1             | 0.7316             |
| ENSP00000264818   | TYK2               | 0.7263             |
| ENSP00000302836   | HOXC9              | 0.7263             |
| ENSP00000262187   | RHEB               | 0.7237             |
| ENSP00000337088   | MEN1               | 0.7237             |
| ENSP00000358162   | HIST2H4A           | 0.7237             |
| ENSP00000239882   | ELF1               | 0.7237             |
| ENSP00000252669   | ACSBG2             | 0.7237             |
| ENSP00000264834   | KLF1               | 0.7184             |
| ENSP00000222462   | WNT16              | 0.7158             |
| ENSP00000295713   | SRGAP2             | 0.7158             |
| ENSP00000267205   | RHOF               | 0.7158             |
| ENSP00000307321   | HOXC10             | 0.7158             |
| ENSP00000378702   | BRD2               | 0.7158             |
| ENSP00000331327   | WT1                | 0.7105             |
| ENSP00000471921   | SPIB               | 0.7105             |
| ENSP00000309439   | HOXB9              | 0.7105             |

|                 |          |        |
|-----------------|----------|--------|
| ENSP00000348258 | HIST1H4L | 0.7105 |
| ENSP00000339007 | GRB2     | 0.7105 |
| ENSP00000259089 | BLK      | 0.7105 |
| ENSP00000347198 | SRGAP1   | 0.7079 |
| ENSP00000343477 | RUNX3    | 0.7079 |
| ENSP00000396259 | PAX2     | 0.7079 |
| ENSP00000363822 | AR       | 0.7079 |
| ENSP00000215781 | OSM      | 0.7053 |
| ENSP00000366974 | HIST1H4F | 0.7053 |
| ENSP00000262995 | GAB1     | 0.7053 |
| ENSP00000242159 | HOXA7    | 0.7026 |
| ENSP00000350159 | HIST1H4K | 0.7026 |
| ENSP00000265495 | ELF2     | 0.7026 |
| ENSP00000364919 | DIRAS2   | 0.7026 |
| ENSP00000263239 | DDX18    | 0.7026 |
| ENSP00000305422 | CEBPB    | 0.7026 |
| ENSP00000394932 | CDKN2A   | 0.7026 |
| ENSP00000310170 | FOSL1    | 0.7000 |
| ENSP00000338018 | HIF1A    | 0.6974 |
| ENSP00000216101 | RASL10A  | 0.6947 |
| ENSP00000312436 | NFE2     | 0.6947 |
| ENSP00000234091 | ID2      | 0.6947 |
| ENSP00000368632 | GATA3    | 0.6947 |
| ENSP00000220003 | CSK      | 0.6947 |
| ENSP00000341208 | STAT5A   | 0.6921 |
| ENSP00000419692 | RXRA     | 0.6921 |
| ENSP00000360493 | RUNX2    | 0.6921 |
| ENSP00000466680 | RND2     | 0.6921 |
| ENSP00000314151 | KLK3     | 0.6921 |
| ENSP00000358153 | HIST2H4B | 0.6921 |
| ENSP00000365012 | HCK      | 0.6921 |
| ENSP00000352673 | ELF3     | 0.6921 |
| ENSP00000264972 | ZAP70    | 0.6895 |
| ENSP00000290167 | WNT4     | 0.6895 |
| ENSP00000220507 | RHOV     | 0.6895 |
| ENSP00000249071 | RAC2     | 0.6895 |
| ENSP00000226574 | NFKB1    | 0.6895 |
| ENSP00000356234 | KDM5B    | 0.6895 |
| ENSP00000261937 | FLT4     | 0.6895 |
| ENSP00000380033 | DDX17    | 0.6895 |
| ENSP00000362195 | CSF3R    | 0.6895 |
| ENSP00000155926 | TRIB2    | 0.6868 |
| ENSP00000320147 | EZH2     | 0.6868 |
| ENSP00000300134 | STAT6    | 0.6842 |
| ENSP00000364190 | PBX2     | 0.6842 |
| ENSP00000353624 | HIST1H4E | 0.6842 |
| ENSP00000226317 | CXCL6    | 0.6842 |
| ENSP00000256495 | BHLHE40  | 0.6842 |
| ENSP00000242261 | TWIST1   | 0.6816 |
| ENSP00000380921 | SH3KBP1  | 0.6816 |
| ENSP00000263895 | RND3     | 0.6816 |
| ENSP00000339467 | RHOG     | 0.6816 |
| ENSP00000352336 | PLCG2    | 0.6816 |

|                 |          |        |
|-----------------|----------|--------|
| ENSP00000229307 | NANOG    | 0.6816 |
| ENSP00000353483 | MAPK8    | 0.6816 |
| ENSP00000290295 | HOXB13   | 0.6816 |
| ENSP00000311010 | ELF5     | 0.6816 |
| ENSP00000296027 | CXCL5    | 0.6816 |
| ENSP00000336790 | ATF4     | 0.6816 |
| ENSP00000281455 | ACSL1    | 0.6816 |
| ENSP00000369981 | SH3GL2   | 0.6789 |
| ENSP00000277120 | NTRK2    | 0.6789 |
| ENSP00000379330 | NFATC2   | 0.6789 |
| ENSP00000376309 | HNRNPA3  | 0.6789 |
| ENSP00000366581 | HIST1H4B | 0.6789 |
| ENSP00000271450 | FCGR2A   | 0.6789 |
| ENSP00000248070 | EPS15L1  | 0.6789 |
| ENSP00000316338 | BAIAP2   | 0.6789 |
| ENSP00000362634 | TSSK3    | 0.6763 |
| ENSP00000274376 | RASA1    | 0.6763 |
| ENSP00000364163 | NOTCH4   | 0.6763 |
| ENSP00000357470 | IL6R     | 0.6763 |
| ENSP00000350767 | HIST4H4  | 0.6763 |
| ENSP00000357615 | FRK      | 0.6763 |
| ENSP00000384675 | SOS1     | 0.6737 |
| ENSP00000401303 | SHC1     | 0.6737 |
| ENSP00000220062 | RASL12   | 0.6737 |
| ENSP00000304283 | RAC3     | 0.6737 |
| ENSP00000228280 | KITLG    | 0.6737 |
| ENSP00000343282 | HIST1H4D | 0.6737 |
| ENSP00000294702 | GFI1     | 0.6737 |
| ENSP00000272164 | WNT9A    | 0.6711 |
| ENSP00000346440 | TCF4     | 0.6711 |
| ENSP00000346879 | NKX2-1   | 0.6711 |
| ENSP00000363689 | ID3      | 0.6711 |
| ENSP00000328928 | HOXB4    | 0.6711 |
| ENSP00000322898 | EBF1     | 0.6711 |
| ENSP00000297268 | COL1A2   | 0.6711 |
| ENSP00000384869 | CLHC1    | 0.6711 |
| ENSP00000339179 | TSSK4    | 0.6684 |
| ENSP00000375081 | TSSK1B   | 0.6684 |
| ENSP00000370421 | PDX1     | 0.6684 |
| ENSP00000378485 | MATK     | 0.6684 |
| ENSP00000364550 | KDM5C    | 0.6684 |
| ENSP00000298229 | INPPL1   | 0.6684 |
| ENSP00000367034 | HIST1H4C | 0.6684 |
| ENSP00000354952 | GAB2     | 0.6684 |
| ENSP00000289902 | FCER1G   | 0.6684 |
| ENSP00000343925 | ESR2     | 0.6684 |
| ENSP00000435835 | EHF      | 0.6684 |
| ENSP00000244741 | CDKN1A   | 0.6684 |
| ENSP00000378699 | CDK1     | 0.6684 |
| ENSP00000354568 | BRDT     | 0.6684 |
| ENSP00000308461 | RND1     | 0.6658 |
| ENSP00000358525 | NGF      | 0.6658 |
| ENSP00000323178 | KSR1     | 0.6658 |

|                 |          |        |
|-----------------|----------|--------|
| ENSP00000356946 | FCGR3A   | 0.6658 |
| ENSP00000225474 | CSF3     | 0.6658 |
| ENSP00000359424 | CHUK     | 0.6658 |
| ENSP00000302564 | BCL2L1   | 0.6658 |
| ENSP00000370912 | TEC      | 0.6632 |
| ENSP00000368401 | PAX6     | 0.6632 |
| ENSP00000289352 | HIST1H4H | 0.6632 |
| ENSP00000206249 | ESR1     | 0.6632 |
| ENSP00000264634 | WNT5A    | 0.6605 |
| ENSP00000265440 | TFEC     | 0.6605 |
| ENSP00000358092 | PRDM1    | 0.6605 |
| ENSP00000274335 | PIK3R1   | 0.6605 |
| ENSP00000362588 | PBX3     | 0.6605 |
| ENSP00000288986 | NCK1     | 0.6605 |
| ENSP00000352980 | HIST1H4A | 0.6605 |
| ENSP00000330054 | EEF1A1   | 0.6605 |
| ENSP00000344352 | ATF3     | 0.6605 |
| ENSP00000293328 | STAT5B   | 0.6579 |
| ENSP00000348461 | RAC1     | 0.6579 |
| ENSP00000332353 | PTCH1    | 0.6579 |
| ENSP00000362690 | NR5A1    | 0.6579 |
| ENSP00000254227 | NR0B2    | 0.6579 |
| ENSP00000352834 | MYO1C    | 0.6579 |
| ENSP00000269243 | MYH10    | 0.6579 |
| ENSP00000222390 | HGF      | 0.6579 |
| ENSP00000356694 | FASLG    | 0.6579 |
| ENSP00000386165 | CEBPD    | 0.6579 |
| ENSP00000231656 | CDX1     | 0.6579 |
| ENSP00000293549 | WNT1     | 0.6553 |
| ENSP00000320493 | TRIP10   | 0.6553 |
| ENSP00000264731 | TP63     | 0.6553 |
| ENSP00000329357 | SP1      | 0.6553 |
| ENSP00000329418 | SOCS1    | 0.6553 |
| ENSP00000400175 | RHOA     | 0.6553 |
| ENSP00000268712 | NCOR1    | 0.6553 |
| ENSP00000250003 | MYOD1    | 0.6553 |
| ENSP00000444293 | KDM5D    | 0.6553 |
| ENSP00000347168 | HIST1H4J | 0.6553 |
| ENSP00000266000 | DAXX     | 0.6553 |
| ENSP00000437940 | CD19     | 0.6553 |
| ENSP00000290015 | WNT9B    | 0.6526 |
| ENSP00000396211 | WASF2    | 0.6526 |
| ENSP00000446280 | PCSK5    | 0.6526 |
| ENSP00000353427 | NR4A1    | 0.6526 |
| ENSP00000263388 | NOTCH3   | 0.6526 |
| ENSP00000380252 | NFE2L2   | 0.6526 |
| ENSP00000384018 | NCOR2    | 0.6526 |
| ENSP00000344782 | GFI1B    | 0.6526 |
| ENSP00000252723 | EPO      | 0.6526 |
| ENSP00000265372 | CREM     | 0.6526 |
| ENSP00000369889 | COL2A1   | 0.6526 |
| ENSP00000302216 | ATOH1    | 0.6526 |
| ENSP00000405176 | TWIST2   | 0.6500 |

|                 |          |        |
|-----------------|----------|--------|
| ENSP00000350720 | SMARCA4  | 0.6500 |
| ENSP00000265717 | PRKAR2B  | 0.6500 |
| ENSP00000216797 | NFKBIA   | 0.6500 |
| ENSP00000306157 | IL7R     | 0.6500 |
| ENSP00000243103 | HOXC12   | 0.6500 |
| ENSP00000341826 | HNRNPA1  | 0.6500 |
| ENSP00000268171 | FURIN    | 0.6500 |
| ENSP00000350512 | COPS5    | 0.6500 |
| ENSP00000351671 | CCL20    | 0.6500 |
| ENSP00000413234 | AP2A2    | 0.6500 |
| ENSP00000223023 | WASL     | 0.6474 |
| ENSP00000264554 | SHC2     | 0.6474 |
| ENSP00000300954 | PCSK4    | 0.6474 |
| ENSP00000262545 | PCSK2    | 0.6474 |
| ENSP00000231509 | NR3C1    | 0.6474 |
| ENSP00000245503 | MYH2     | 0.6474 |
| ENSP00000344544 | IKZF3    | 0.6474 |
| ENSP00000222726 | HOXA5    | 0.6474 |
| ENSP00000346839 | FN1      | 0.6474 |
| ENSP00000206513 | CEBPE    | 0.6474 |
| ENSP00000411552 | CDKN1C   | 0.6474 |
| ENSP00000265741 | CDK14    | 0.6474 |
| ENSP00000308774 | BMX      | 0.6474 |
| ENSP00000215115 | BCL7C    | 0.6474 |
| ENSP00000391669 | BCAR1    | 0.6474 |
| ENSP00000348602 | AMPH     | 0.6474 |
| ENSP00000308887 | WNT5B    | 0.6447 |
| ENSP00000297261 | SHH      | 0.6447 |
| ENSP00000284957 | RABGEF1  | 0.6447 |
| ENSP00000354855 | NFE2L1   | 0.6447 |
| ENSP00000046794 | LCP2     | 0.6447 |
| ENSP00000365280 | ID1      | 0.6447 |
| ENSP00000313199 | HNRNPD   | 0.6447 |
| ENSP00000230882 | GHR      | 0.6447 |
| ENSP00000295822 | EIF5A2   | 0.6447 |
| ENSP00000369461 | ECI2     | 0.6447 |
| ENSP00000345571 | E2F1     | 0.6447 |
| ENSP00000342136 | CREB3    | 0.6447 |
| ENSP00000343818 | CDK5RAP2 | 0.6447 |
| ENSP00000419782 | CDK5     | 0.6447 |
| ENSP00000308176 | BTK      | 0.6447 |
| ENSP00000233948 | WNT6     | 0.6421 |
| ENSP00000447173 | VDR      | 0.6421 |
| ENSP00000269305 | TP53     | 0.6421 |
| ENSP00000264657 | STAT3    | 0.6421 |
| ENSP00000364995 | SHC3     | 0.6421 |
| ENSP00000361120 | RALGDS   | 0.6421 |
| ENSP00000327850 | NFATC1   | 0.6421 |
| ENSP00000317580 | NEUROG1  | 0.6421 |
| ENSP00000361066 | NCOA3    | 0.6421 |
| ENSP00000301067 | MLL2     | 0.6421 |
| ENSP00000346389 | MEF2A    | 0.6421 |
| ENSP00000362649 | HDAC1    | 0.6421 |

|                 |          |        |
|-----------------|----------|--------|
| ENSP00000266970 | CDK2     | 0.6421 |
| ENSP00000243440 | BATF3    | 0.6421 |
| ENSP00000364893 | ARHGEF7  | 0.6421 |
| ENSP00000288266 | APPL1    | 0.6421 |
| ENSP00000284523 | WNT3A    | 0.6395 |
| ENSP00000301061 | WNT10B   | 0.6395 |
| ENSP00000222270 | WBP7     | 0.6395 |
| ENSP00000256474 | VHL      | 0.6395 |
| ENSP00000356999 | USF1     | 0.6395 |
| ENSP00000364912 | SPEN     | 0.6395 |
| ENSP00000356022 | SOD2     | 0.6395 |
| ENSP00000338345 | SNCA     | 0.6395 |
| ENSP00000341551 | SMAD4    | 0.6395 |
| ENSP00000391592 | PTPN6    | 0.6395 |
| ENSP00000251203 | PBX4     | 0.6395 |
| ENSP00000263800 | LTK      | 0.6395 |
| ENSP00000303830 | INSR     | 0.6395 |
| ENSP00000264716 | FOSL2    | 0.6395 |
| ENSP00000389934 | EXOC5    | 0.6395 |
| ENSP00000317955 | EEA1     | 0.6395 |
| ENSP00000296871 | CSF2     | 0.6395 |
| ENSP00000364979 | COL4A1   | 0.6395 |
| ENSP00000282050 | ATP5A1   | 0.6395 |
| ENSP00000264110 | ATF2     | 0.6395 |
| ENSP00000303909 | ABR      | 0.6395 |
| ENSP00000283195 | RANBP2   | 0.6368 |
| ENSP00000382177 | MYO5A    | 0.6368 |
| ENSP00000378845 | LAT      | 0.6368 |
| ENSP00000370719 | ITSN1    | 0.6368 |
| ENSP00000333950 | FMN1     | 0.6368 |
| ENSP00000338934 | EZR      | 0.6368 |
| ENSP00000342626 | EYA1     | 0.6368 |
| ENSP00000295206 | EN1      | 0.6368 |
| ENSP00000332171 | DMTF1    | 0.6368 |
| ENSP00000400088 | CDK3     | 0.6368 |
| ENSP00000431445 | CD3G     | 0.6368 |
| ENSP00000295095 | ARHGAP15 | 0.6368 |
| ENSP00000257430 | APC      | 0.6368 |
| ENSP00000216037 | XBP1     | 0.6342 |
| ENSP00000368924 | TFAP2A   | 0.6342 |
| ENSP00000309572 | TERT     | 0.6342 |
| ENSP00000473233 | SPIB     | 0.6342 |
| ENSP00000244745 | SOX4     | 0.6342 |
| ENSP00000231487 | SKP1     | 0.6342 |
| ENSP00000329668 | SHC4     | 0.6342 |
| ENSP00000332296 | RARB     | 0.6342 |
| ENSP00000291547 | PKNOX1   | 0.6342 |
| ENSP00000325120 | PGR      | 0.6342 |
| ENSP00000344220 | PDPK1    | 0.6342 |
| ENSP00000254846 | KDM6B    | 0.6342 |
| ENSP00000358997 | IRAK1    | 0.6342 |
| ENSP00000263851 | IL7      | 0.6342 |
| ENSP00000258743 | IL6      | 0.6342 |

|                 |         |        |
|-----------------|---------|--------|
| ENSP00000359531 | GTF2B   | 0.6342 |
| ENSP00000321797 | FGF8    | 0.6342 |
| ENSP00000325527 | FBN1    | 0.6342 |
| ENSP00000324464 | CSNK1D  | 0.6342 |
| ENSP00000427550 | CEP192  | 0.6342 |
| ENSP00000382271 | CEP152  | 0.6342 |
| ENSP00000284000 | CEBPG   | 0.6342 |
| ENSP00000361359 | CD40    | 0.6342 |
| ENSP00000359206 | BTRC    | 0.6342 |
| ENSP00000362777 | ATOH7   | 0.6342 |
| ENSP00000264316 | TXK     | 0.6316 |
| ENSP00000217233 | TRIB3   | 0.6316 |
| ENSP00000265354 | SRF     | 0.6316 |
| ENSP00000332973 | SMAD3   | 0.6316 |
| ENSP00000316729 | RHOJ    | 0.6316 |
| ENSP00000244007 | PLCG1   | 0.6316 |
| ENSP00000346508 | PDGFA   | 0.6316 |
| ENSP00000398177 | KCTD7   | 0.6316 |
| ENSP00000343745 | DICER1  | 0.6316 |
| ENSP00000300692 | CD3D    | 0.6316 |
| ENSP00000269321 | ARHGDIA | 0.6316 |
| ENSP00000325526 | WNT11   | 0.6289 |
| ENSP00000352802 | WIPF1   | 0.6289 |
| ENSP00000361125 | VEGFA   | 0.6289 |
| ENSP00000405574 | TBL1XR1 | 0.6289 |
| ENSP00000323588 | SOX2    | 0.6289 |
| ENSP00000234677 | SARS    | 0.6289 |
| ENSP00000357721 | S100A8  | 0.6289 |
| ENSP00000345206 | RBPJ    | 0.6289 |
| ENSP00000299440 | RAG1    | 0.6289 |
| ENSP00000262033 | PTGES3  | 0.6289 |
| ENSP00000371432 | PRLR    | 0.6289 |
| ENSP00000345494 | PLSCR1  | 0.6289 |
| ENSP00000234313 | PLEK    | 0.6289 |
| ENSP00000355759 | PARP1   | 0.6289 |
| ENSP00000327758 | NKX2-5  | 0.6289 |
| ENSP00000368759 | NEDD9   | 0.6289 |
| ENSP00000348634 | MYH6    | 0.6289 |
| ENSP00000389338 | MAPK9   | 0.6289 |
| ENSP00000365016 | IRS2    | 0.6289 |
| ENSP00000343464 | HELT    | 0.6289 |
| ENSP00000408617 | HDAC9   | 0.6289 |
| ENSP00000365840 | ENTPD6  | 0.6289 |
| ENSP00000262904 | E2F3    | 0.6289 |
| ENSP00000339845 | DROSHA  | 0.6289 |
| ENSP00000311825 | CTBP2   | 0.6289 |
| ENSP00000357622 | CRTC2   | 0.6289 |
| ENSP00000257287 | CEP135  | 0.6289 |
| ENSP00000260967 | CDK15   | 0.6289 |
| ENSP00000085219 | CD22    | 0.6289 |
| ENSP00000370803 | CCP110  | 0.6289 |
| ENSP00000247843 | YEATS4  | 0.6263 |
| ENSP00000251413 | TUBG1   | 0.6263 |

|                 |         |        |
|-----------------|---------|--------|
| ENSP00000230354 | TBP     | 0.6263 |
| ENSP00000352121 | PIK3CG  | 0.6263 |
| ENSP00000305056 | PCSK6   | 0.6263 |
| ENSP00000352572 | PCNT    | 0.6263 |
| ENSP00000368253 | NR0B1   | 0.6263 |
| ENSP00000465655 | NFIC    | 0.6263 |
| ENSP00000363318 | IL2RG   | 0.6263 |
| ENSP00000430684 | IKBKB   | 0.6263 |
| ENSP00000253083 | HIP1R   | 0.6263 |
| ENSP00000324806 | GSK3B   | 0.6263 |
| ENSP00000339186 | GRAP2   | 0.6263 |
| ENSP00000339004 | FOXG1   | 0.6263 |
| ENSP00000250448 | FOXA1   | 0.6263 |
| ENSP00000408632 | CDH13   | 0.6263 |
| ENSP00000278616 | ATM     | 0.6263 |
| ENSP00000309503 | YWHAZ   | 0.6237 |
| ENSP00000361626 | YBX1    | 0.6237 |
| ENSP00000245932 | VASP    | 0.6237 |
| ENSP00000324856 | STK11   | 0.6237 |
| ENSP00000353089 | SRSF2   | 0.6237 |
| ENSP00000354130 | SOX10   | 0.6237 |
| ENSP00000330341 | SOCS3   | 0.6237 |
| ENSP00000364649 | SDHB    | 0.6237 |
| ENSP00000238738 | RHOQ    | 0.6237 |
| ENSP00000248706 | RASL11B | 0.6237 |
| ENSP00000356840 | POU2F1  | 0.6237 |
| ENSP00000289153 | PIK3CB  | 0.6237 |
| ENSP00000384625 | NLK     | 0.6237 |
| ENSP00000347134 | NET1    | 0.6237 |
| ENSP00000358022 | MCL1    | 0.6237 |
| ENSP00000254301 | LGALS3  | 0.6237 |
| ENSP00000263754 | KAT2B   | 0.6237 |
| ENSP00000240874 | KALRN   | 0.6237 |
| ENSP00000311113 | JUP     | 0.6237 |
| ENSP00000245414 | IRF1    | 0.6237 |
| ENSP00000400717 | GNA13   | 0.6237 |
| ENSP00000393725 | GFRA1   | 0.6237 |
| ENSP00000334458 | GATA4   | 0.6237 |
| ENSP00000315955 | FOXA2   | 0.6237 |
| ENSP00000293831 | EIF4A1  | 0.6237 |
| ENSP00000344115 | CDH5    | 0.6237 |
| ENSP00000223368 | BCL7B   | 0.6237 |
| ENSP00000393583 | AZI1    | 0.6237 |
| ENSP00000269260 | ARRB2   | 0.6237 |
| ENSP00000428340 | ANGPT1  | 0.6237 |
| ENSP00000261439 | TBC1D1  | 0.6211 |
| ENSP00000366306 | SPRY2   | 0.6211 |
| ENSP00000262160 | SMAD2   | 0.6211 |
| ENSP00000271640 | SETDB1  | 0.6211 |
| ENSP00000274031 | SETD7   | 0.6211 |
| ENSP00000299759 | RRAD    | 0.6211 |
| ENSP00000267396 | REM2    | 0.6211 |
| ENSP00000267163 | RB1     | 0.6211 |



|                 |           |        |
|-----------------|-----------|--------|
| ENSP00000216127 | RASD2     | 0.6211 |
| ENSP00000225688 | RASD1     | 0.6211 |
| ENSP00000361266 | PTCH2     | 0.6211 |
| ENSP00000344479 | NR4A2     | 0.6211 |
| ENSP00000353679 | MME       | 0.6211 |
| ENSP00000262189 | MLL3      | 0.6211 |
| ENSP00000306512 | IL8       | 0.6211 |
| ENSP00000232424 | HES1      | 0.6211 |
| ENSP00000264606 | HDAC4     | 0.6211 |
| ENSP00000406209 | EPN1      | 0.6211 |
| ENSP00000355809 | ENAH      | 0.6211 |
| ENSP00000217182 | EEF1A2    | 0.6211 |
| ENSP00000355718 | DLL1      | 0.6211 |
| ENSP00000358490 | CD2       | 0.6211 |
| ENSP00000257347 | CARS2     | 0.6211 |
| ENSP00000290551 | BTG2      | 0.6211 |
| ENSP00000227758 | BIRC2     | 0.6211 |
| ENSP00000357177 | ARHGEF11  | 0.6211 |
| ENSP00000292807 | AP2M1     | 0.6211 |
| ENSP00000264335 | YWHAE     | 0.6184 |
| ENSP00000300145 | XRCC6BP1  | 0.6184 |
| ENSP00000320924 | WIPF2     | 0.6184 |
| ENSP00000222305 | USF2      | 0.6184 |
| ENSP00000344818 | UBC       | 0.6184 |
| ENSP00000354168 | TSSK6     | 0.6184 |
| ENSP00000382544 | TSSK2     | 0.6184 |
| ENSP00000367545 | TP73      | 0.6184 |
| ENSP00000362221 | STK40     | 0.6184 |
| ENSP00000274255 | SKP2      | 0.6184 |
| ENSP00000355652 | RHOA      | 0.6184 |
| ENSP00000313420 | PRKDC     | 0.6184 |
| ENSP00000346148 | PRKAA1    | 0.6184 |
| ENSP00000297494 | NOS3      | 0.6184 |
| ENSP00000172229 | NGFR      | 0.6184 |
| ENSP00000359212 | LBX1      | 0.6184 |
| ENSP00000261233 | IRAK3     | 0.6184 |
| ENSP00000327890 | IL3RA     | 0.6184 |
| ENSP00000341285 | HNRNPA1L2 | 0.6184 |
| ENSP00000357348 | HEY2      | 0.6184 |
| ENSP00000403459 | GRB7      | 0.6184 |
| ENSP00000281708 | FBXW7     | 0.6184 |
| ENSP00000297375 | EN2       | 0.6184 |
| ENSP00000328547 | DNMT3B    | 0.6184 |
| ENSP00000253452 | COX4I1    | 0.6184 |
| ENSP00000276052 | CDK16     | 0.6184 |
| ENSP00000325690 | CARM1     | 0.6184 |
| ENSP00000302625 | AXIN2     | 0.6184 |
| ENSP00000349960 | ACTB      | 0.6184 |
| ENSP00000364749 | VPS29     | 0.6158 |
| ENSP00000352425 | TUSC3     | 0.6158 |
| ENSP00000371308 | SUGT1P3   | 0.6158 |
| ENSP00000217188 | SRMS      | 0.6158 |
| ENSP00000308413 | SGK3      | 0.6158 |

|                 |                 |        |
|-----------------|-----------------|--------|
| ENSP00000282030 | SETBP1          | 0.6158 |
| ENSP00000272317 | RPS27A          | 0.6158 |
| ENSP00000201979 | REM1            | 0.6158 |
| ENSP00000268864 | RASL10B         | 0.6158 |
| ENSP00000262735 | PPARA           | 0.6158 |
| ENSP00000405965 | NANOGP1         | 0.6158 |
| ENSP00000255381 | MYH4            | 0.6158 |
| ENSP00000271555 | MEF2D           | 0.6158 |
| ENSP00000324948 | MCM10           | 0.6158 |
| ENSP00000409007 | MAT1A           | 0.6158 |
| ENSP00000304802 | ITGB3           | 0.6158 |
| ENSP00000268182 | IQGAP1          | 0.6158 |
| ENSP00000307786 | GNB1            | 0.6158 |
| ENSP00000262493 | GNAO1           | 0.6158 |
| ENSP00000078429 | GNA11           | 0.6158 |
| ENSP00000252997 | GATA5           | 0.6158 |
| ENSP00000364265 | FKBP5           | 0.6158 |
| ENSP00000357555 | ENSG00000259131 | 0.6158 |
| ENSP00000339428 | EMX2            | 0.6158 |
| ENSP00000398632 | EARS2           | 0.6158 |
| ENSP00000341698 | DAB1            | 0.6158 |
| ENSP00000262653 | CBFA2T2         | 0.6158 |
| ENSP00000241052 | CAT             | 0.6158 |
| ENSP00000229922 | CAP2            | 0.6158 |
| ENSP00000312987 | BMPR1A          | 0.6158 |
| ENSP00000242728 | BHLHE41         | 0.6158 |
| ENSP00000312856 | BCL10           | 0.6158 |
| ENSP00000349547 | ARHGAP18        | 0.6158 |
| ENSP00000452871 | ABLM1           | 0.6158 |
| ENSP00000293813 | DLG4            | 0.6158 |
| ENSP00000245960 | ZC3H12A         | 0.6132 |
| ENSP00000324422 | WASH6P          | 0.6132 |
| ENSP00000358708 | U2SURP          | 0.6132 |
| ENSP00000234420 | TUBB8           | 0.6132 |
| ENSP00000263036 | SMGA            | 0.6132 |
| ENSP00000258411 | RPS4XP21        | 0.6132 |
| ENSP00000326804 | PRF1            | 0.6132 |
| ENSP00000347507 | ONECUT2         | 0.6132 |
| ENSP00000020945 | NUDT2           | 0.6132 |
| ENSP00000358918 | NPIPL3          | 0.6132 |
| ENSP00000230449 | MRRFP1          | 0.6132 |
| ENSP00000264935 | MAPKAPK5        | 0.6132 |
| ENSP00000321656 | FBXW4           | 0.6132 |
| ENSP00000344871 | ENSG00000258508 | 0.6132 |
| ENSP00000387282 | ENSG00000258447 | 0.6132 |
| ENSP00000324884 | ENSG00000258210 | 0.6132 |
| ENSP00000311505 | ENSG00000248354 | 0.6132 |
| ENSP00000242338 | ENSG00000236954 | 0.6132 |
| ENSP00000239144 | ENSG00000232856 | 0.6132 |
| ENSP00000232607 | DRD1            | 0.6132 |
| ENSP00000340347 | CCNYL2          | 0.6132 |
| ENSP00000358795 | CATSPER2        | 0.6132 |
| ENSP00000357292 | CAND1           | 0.6132 |

|                 |                 |        |
|-----------------|-----------------|--------|
| ENSP00000262320 | C1R             | 0.6132 |
| ENSP00000219070 | AARSD1          | 0.6132 |
| ENSP00000365735 | ZSCAN20         | 0.6105 |
| ENSP00000354876 | VWA2            | 0.6105 |
| ENSP00000249636 | TMSB4XP4        | 0.6105 |
| ENSP00000338548 | STAP2           | 0.6105 |
| ENSP00000313829 | SEPT7L          | 0.6105 |
| ENSP00000382595 | NPIPP1          | 0.6105 |
| ENSP00000291442 | MST1L           | 0.6105 |
| ENSP00000314067 | MCOLN3          | 0.6105 |
| ENSP00000351273 | LPPR1           | 0.6105 |
| ENSP00000264664 | KIAA0100        | 0.6105 |
| ENSP00000362361 | HMGH4           | 0.6105 |
| ENSP00000262407 | hCG 33128       | 0.6105 |
| ENSP00000365233 | GABRR3          | 0.6105 |
| ENSP00000365380 | FXD4            | 0.6105 |
| ENSP00000391774 | FGL1            | 0.6105 |
| ENSP00000444972 | FAM74A2         | 0.6105 |
| ENSP00000231790 | ENSG00000267149 | 0.6105 |
| ENSP00000423665 | ENSG00000262314 | 0.6105 |
| ENSP00000219409 | ENSG00000260527 | 0.6105 |
| ENSP00000426909 | ENSG00000250765 | 0.6105 |
| ENSP00000366843 | ENSG00000235153 | 0.6105 |
| ENSP00000269216 | DNAAF3          | 0.6105 |
| ENSP00000219476 | DGAT2L7P        | 0.6105 |
| ENSP00000326514 | DENND4C         | 0.6105 |
| ENSP00000391372 | CMAHP           | 0.6105 |
| ENSP00000355249 | CCNJ            | 0.6105 |
| ENSP00000253792 | BTNL2           | 0.6105 |
| ENSP00000383042 | ANKRD36BP1      | 0.6105 |
| ENSP00000372170 | ZNF730          | 0.6079 |
| ENSP00000174618 | ZNF623          | 0.6079 |
| ENSP00000352264 | ZNF503-AS2      | 0.6079 |
| ENSP00000263734 | SNX29P2         | 0.6079 |
| ENSP00000336702 | SNX29           | 0.6079 |
| ENSP00000230658 | SNURFL          | 0.6079 |
| ENSP00000336524 | SNHG16          | 0.6079 |
| ENSP00000314414 | SKA2L           | 0.6079 |
| ENSP00000239165 | POM121L4P       | 0.6079 |
| ENSP00000360561 | POM121L1P       | 0.6079 |
| ENSP00000338283 | OR5V1           | 0.6079 |
| ENSP00000343027 | NG38            | 0.6079 |
| ENSP00000351490 | NBPF4           | 0.6079 |
| ENSP00000367629 | MIR7-3HG        | 0.6079 |
| ENSP00000264867 | MICA            | 0.6079 |
| ENSP00000245539 | LOC619207       | 0.6079 |
| ENSP00000225983 | LINC00493       | 0.6079 |
| ENSP00000417653 | LINC00273       | 0.6079 |
| ENSP00000260762 | GYG2P1          | 0.6079 |
| ENSP00000216223 | GNRHR2          | 0.6079 |
| ENSP00000365576 | FLJ00096        | 0.6079 |
| ENSP00000239243 | FAM74A1         | 0.6079 |
| ENSP00000353099 | FAM205B         | 0.6079 |

|                 |                 |        |
|-----------------|-----------------|--------|
| ENSP00000347979 | FAM201A         | 0.6079 |
| ENSP00000344666 | FAM182A         | 0.6079 |
| ENSP00000365745 | FAM157A         | 0.6079 |
| ENSP00000300161 | ENSG00000259141 | 0.6079 |
| ENSP00000229002 | ENSG00000257755 | 0.6079 |
| ENSP00000366563 | ENSG00000240215 | 0.6079 |
| ENSP00000227378 | ENSG00000229450 | 0.6079 |
| ENSP00000278568 | ENSG00000228006 | 0.6079 |
| ENSP00000284981 | ENSG00000197511 | 0.6079 |
| ENSP00000427802 | ENSG00000197426 | 0.6079 |
| ENSP00000362208 | ENSG00000178803 | 0.6079 |
| ENSP00000430706 | EIF5AL1         | 0.6079 |
| ENSP00000254231 | DEFB117         | 0.6079 |
| ENSP00000239151 | CC2D2B          | 0.6079 |
| ENSP00000377941 | C18orf63        | 0.6079 |
| ENSP00000245552 | C12orf52        | 0.6079 |
| ENSP00000253861 | C10orf131       | 0.6079 |
| ENSP00000295108 | BRWD1-IT2       | 0.6079 |
| ENSP00000037243 | ASB16-AS1       | 0.6079 |
| ENSP00000351255 | STAT4           | 0.6053 |
| ENSP00000305769 | SMAD1           | 0.6053 |
| ENSP00000212015 | SIRT1           | 0.6053 |
| ENSP00000357727 | S100A9          | 0.6053 |
| ENSP00000356530 | RNASEL          | 0.6053 |
| ENSP00000362768 | RBL1            | 0.6053 |
| ENSP00000303208 | PCSK9           | 0.6053 |
| ENSP00000301905 | PBK             | 0.6053 |
| ENSP00000377721 | NR2F2           | 0.6053 |
| ENSP00000240055 | NFYB            | 0.6053 |
| ENSP00000056233 | NFE2L3          | 0.6053 |
| ENSP00000451211 | NEDD1           | 0.6053 |
| ENSP00000226209 | MYH3            | 0.6053 |
| ENSP00000401399 | MYD88           | 0.6053 |
| ENSP00000363533 | MDH1B           | 0.6053 |
| ENSP00000352157 | MAPK10          | 0.6053 |
| ENSP00000301653 | KRT16           | 0.6053 |
| ENSP00000309148 | KLK6            | 0.6053 |
| ENSP00000254958 | JAG1            | 0.6053 |
| ENSP00000304895 | IRS1            | 0.6053 |
| ENSP00000299767 | HSP90B1         | 0.6053 |
| ENSP00000343246 | HOXA1           | 0.6053 |
| ENSP00000266458 | GABARAPL1       | 0.6053 |
| ENSP00000342307 | FOX M1          | 0.6053 |
| ENSP00000366534 | FOX H1          | 0.6053 |
| ENSP00000360216 | DNTT            | 0.6053 |
| ENSP00000347890 | DNM2            | 0.6053 |
| ENSP00000354923 | DMD             | 0.6053 |
| ENSP00000360020 | DIRAS3          | 0.6053 |
| ENSP00000422753 | DDX41           | 0.6053 |
| ENSP00000228872 | CDKN1B          | 0.6053 |
| ENSP00000354566 | CD3E            | 0.6053 |
| ENSP00000377978 | CCL4L2          | 0.6053 |
| ENSP00000418960 | BRCA1           | 0.6053 |

|                 |         |        |
|-----------------|---------|--------|
| ENSP00000349076 | ATN1    | 0.6053 |
| ENSP00000343535 | USP7    | 0.6026 |
| ENSP00000362481 | UPRT    | 0.6026 |
| ENSP00000337853 | TRAF6   | 0.6026 |
| ENSP00000262953 | TLE2    | 0.6026 |
| ENSP00000361554 | TIE1    | 0.6026 |
| ENSP00000245479 | SOX9    | 0.6026 |
| ENSP00000363812 | RXRB    | 0.6026 |
| ENSP00000356480 | RNF2    | 0.6026 |
| ENSP00000265335 | RAD50   | 0.6026 |
| ENSP00000356346 | PTPRC   | 0.6026 |
| ENSP00000366413 | POU4F1  | 0.6026 |
| ENSP00000407509 | PNPLA6  | 0.6026 |
| ENSP00000222254 | PIK3R2  | 0.6026 |
| ENSP00000465676 | PIAS2   | 0.6026 |
| ENSP00000362413 | PGK1    | 0.6026 |
| ENSP00000334188 | PFDN5   | 0.6026 |
| ENSP00000371875 | NKX3-2  | 0.6026 |
| ENSP00000370253 | NKX3-1  | 0.6026 |
| ENSP00000345702 | NFYA    | 0.6026 |
| ENSP00000228644 | MYF5    | 0.6026 |
| ENSP00000302486 | MAP2K1  | 0.6026 |
| ENSP00000339952 | KSR2    | 0.6026 |
| ENSP00000267569 | JDP2    | 0.6026 |
| ENSP00000263339 | IL1A    | 0.6026 |
| ENSP00000363827 | HSPG2   | 0.6026 |
| ENSP00000338272 | HEY1    | 0.6026 |
| ENSP00000371236 | GART    | 0.6026 |
| ENSP00000360025 | GADD45A | 0.6026 |
| ENSP00000384708 | FSHR    | 0.6026 |
| ENSP00000360157 | FOXD3   | 0.6026 |
| ENSP00000307940 | EEF2    | 0.6026 |
| ENSP00000266991 | DHH     | 0.6026 |
| ENSP00000352929 | CSNK1E  | 0.6026 |
| ENSP00000384053 | CSF2RB  | 0.6026 |
| ENSP00000327513 | CSF1    | 0.6026 |
| ENSP00000255465 | CCNA1   | 0.6026 |
| ENSP00000272298 | CALM2   | 0.6026 |
| ENSP00000264705 | CAD     | 0.6026 |
| ENSP00000293288 | BAX     | 0.6026 |
| ENSP00000266744 | ASCL1   | 0.6026 |
| ENSP00000351926 | AP2A1   | 0.6026 |
| ENSP00000291582 | AIRE    | 0.6026 |
| ENSP00000221561 | AES     | 0.6026 |
| ENSP00000251412 | TUBG2   | 0.6000 |
| ENSP00000365682 | TLE1    | 0.6000 |
| ENSP00000281537 | TJP1    | 0.6000 |
| ENSP00000219548 | STUB1   | 0.6000 |
| ENSP00000354394 | STAT1   | 0.6000 |
| ENSP00000231061 | SPARC   | 0.6000 |
| ENSP00000356832 | SGK1    | 0.6000 |
| ENSP00000368884 | RPS6KA3 | 0.6000 |
| ENSP00000317985 | ROCK2   | 0.6000 |

|                 |           |        |
|-----------------|-----------|--------|
| ENSP00000296273 | RFC4      | 0.6000 |
| ENSP00000342026 | PRDX6     | 0.6000 |
| ENSP00000342931 | POU1F1    | 0.6000 |
| ENSP00000363387 | PDIK1L    | 0.6000 |
| ENSP00000355865 | PARK2     | 0.6000 |
| ENSP00000302189 | NHLH1     | 0.6000 |
| ENSP00000297689 | NFIL3     | 0.6000 |
| ENSP00000418842 | NDUFA6    | 0.6000 |
| ENSP00000233154 | NCK2      | 0.6000 |
| ENSP00000262873 | MYH7B     | 0.6000 |
| ENSP00000362036 | MRPS16    | 0.6000 |
| ENSP00000340874 | MEF2C     | 0.6000 |
| ENSP00000178640 | MAP2K5    | 0.6000 |
| ENSP00000349785 | MAP1LC3C  | 0.6000 |
| ENSP00000265854 | MAD1L1    | 0.6000 |
| ENSP0000040584  | HOXC8     | 0.6000 |
| ENSP00000297596 | GEM       | 0.6000 |
| ENSP00000242480 | EGR2      | 0.6000 |
| ENSP00000246069 | DSTN      | 0.6000 |
| ENSP00000381657 | DOT1L     | 0.6000 |
| ENSP00000304669 | CTNNA1    | 0.6000 |
| ENSP00000204604 | CHRD      | 0.6000 |
| ENSP00000266557 | CD27      | 0.6000 |
| ENSP00000320866 | CALR      | 0.6000 |
| ENSP00000337261 | ARHGEF1   | 0.6000 |
| ENSP00000262017 | ITGB3     | 0.6000 |
| ENSP00000248975 | YWHAH     | 0.5974 |
| ENSP00000411532 | TOP2A     | 0.5974 |
| ENSP00000291232 | TNFRSF13C | 0.5974 |
| ENSP00000363089 | TLR4      | 0.5974 |
| ENSP00000320935 | SLC2A4    | 0.5974 |
| ENSP00000322775 | RHBDF2    | 0.5974 |
| ENSP00000369411 | RFC3      | 0.5974 |
| ENSP00000405963 | RASGRF1   | 0.5974 |
| ENSP00000348812 | PTPRD     | 0.5974 |
| ENSP00000360683 | PTPN1     | 0.5974 |
| ENSP00000332816 | PTK2B     | 0.5974 |
| ENSP00000362334 | PSMB2     | 0.5974 |
| ENSP00000361512 | PRPS1     | 0.5974 |
| ENSP00000415481 | PROM1     | 0.5974 |
| ENSP00000326031 | PPP1CA    | 0.5974 |
| ENSP00000329170 | POU3F2    | 0.5974 |
| ENSP00000355031 | PER3      | 0.5974 |
| ENSP00000308024 | PCSK1     | 0.5974 |
| ENSP00000262077 | NUP153    | 0.5974 |
| ENSP00000327251 | NOS2      | 0.5974 |
| ENSP00000345530 | NEDD4     | 0.5974 |
| ENSP00000296474 | MST1R     | 0.5974 |
| ENSP00000272418 | MRPS5     | 0.5974 |
| ENSP00000300651 | MED1      | 0.5974 |
| ENSP00000215832 | MAPK1     | 0.5974 |
| ENSP00000251047 | LMAN1     | 0.5974 |
| ENSP00000294954 | LHCGR     | 0.5974 |

|                 |         |        |
|-----------------|---------|--------|
| ENSP00000419923 | KLF6    | 0.5974 |
| ENSP00000363804 | KLF4    | 0.5974 |
| ENSP00000414982 | KLC1    | 0.5974 |
| ENSP00000363998 | ITCH    | 0.5974 |
| ENSP00000342557 | IL4I1   | 0.5974 |
| ENSP00000301585 | ICT1    | 0.5974 |
| ENSP00000270112 | HUNK    | 0.5974 |
| ENSP00000318687 | HSPH1   | 0.5974 |
| ENSP00000257555 | HNF1A   | 0.5974 |
| ENSP00000328773 | HEXIM1  | 0.5974 |
| ENSP00000322542 | GTF2I   | 0.5974 |
| ENSP00000229239 | GAPDH   | 0.5974 |
| ENSP00000273550 | FTH1    | 0.5974 |
| ENSP00000265171 | EGF     | 0.5974 |
| ENSP00000381932 | DYRK1A  | 0.5974 |
| ENSP00000313391 | DAB2    | 0.5974 |
| ENSP00000260433 | CYP19A1 | 0.5974 |
| ENSP00000409346 | CISH    | 0.5974 |
| ENSP00000372023 | CHEK2   | 0.5974 |
| ENSP00000314458 | CDC42   | 0.5974 |
| ENSP00000286186 | CASP10  | 0.5974 |
| ENSP00000376943 | BCL2L11 | 0.5974 |
| ENSP00000244769 | ATXN1   | 0.5974 |
| ENSP00000314897 | ANGPT2  | 0.5974 |
| ENSP00000367869 | GNB1    | 0.5974 |
| ENSP00000262238 | YY1     | 0.5947 |
| ENSP00000238081 | YWHAQ   | 0.5947 |
| ENSP00000264951 | XRN1    | 0.5947 |
| ENSP00000340677 | WNT8B   | 0.5947 |
| ENSP00000277575 | USP6NL  | 0.5947 |
| ENSP00000312150 | TRIB1   | 0.5947 |
| ENSP00000467176 | TNNT1   | 0.5947 |
| ENSP00000385834 | TF      | 0.5947 |
| ENSP00000376611 | TDG     | 0.5947 |
| ENSP00000376076 | SUMO1   | 0.5947 |
| ENSP00000359025 | STXBP3  | 0.5947 |
| ENSP00000244020 | SRSF6   | 0.5947 |
| ENSP00000377892 | SRSF5   | 0.5947 |
| ENSP00000464034 | SOCS7   | 0.5947 |
| ENSP00000351593 | SMTN    | 0.5947 |
| ENSP00000352900 | RXRG    | 0.5947 |
| ENSP00000473172 | RUVBL2  | 0.5947 |
| ENSP00000259808 | RIPK1   | 0.5947 |
| ENSP00000308620 | RAG2    | 0.5947 |
| ENSP00000331602 | PRKCD   | 0.5947 |
| ENSP00000360290 | PRKAA2  | 0.5947 |
| ENSP00000321746 | PDLIM5  | 0.5947 |
| ENSP00000361949 | PABPC4  | 0.5947 |
| ENSP00000318165 | OS9     | 0.5947 |
| ENSP00000351894 | NCOA6   | 0.5947 |
| ENSP00000241651 | MYOG    | 0.5947 |
| ENSP00000285039 | MYO5B   | 0.5947 |
| ENSP00000364361 | MLTK    | 0.5947 |

|                 |          |        |
|-----------------|----------|--------|
| ENSP00000327070 | MDH2     | 0.5947 |
| ENSP00000264156 | MCM6     | 0.5947 |
| ENSP00000262105 | MCM4     | 0.5947 |
| ENSP00000362717 | LHX2     | 0.5947 |
| ENSP00000307078 | KIF5B    | 0.5947 |
| ENSP00000361202 | IRS4     | 0.5947 |
| ENSP00000268638 | IRF8     | 0.5947 |
| ENSP00000256458 | IRAK2    | 0.5947 |
| ENSP00000256079 | IPO8     | 0.5947 |
| ENSP00000369293 | IL2RA    | 0.5947 |
| ENSP00000308252 | HOXB3    | 0.5947 |
| ENSP00000353151 | HOXA4    | 0.5947 |
| ENSP00000349168 | HNRNPH1  | 0.5947 |
| ENSP00000260372 | HAUS2    | 0.5947 |
| ENSP00000398131 | GSPT1    | 0.5947 |
| ENSP00000334448 | GNG2     | 0.5947 |
| ENSP00000371790 | FGF9     | 0.5947 |
| ENSP00000384169 | FBLN2    | 0.5947 |
| ENSP00000334100 | EXOC7    | 0.5947 |
| ENSP00000281172 | EPS8     | 0.5947 |
| ENSP00000351209 | EPHA2    | 0.5947 |
| ENSP00000351520 | ENTPD4   | 0.5947 |
| ENSP00000329715 | DRG1     | 0.5947 |
| ENSP00000233668 | DOK1     | 0.5947 |
| ENSP00000280333 | DOCK1    | 0.5947 |
| ENSP00000264709 | DNMT3A   | 0.5947 |
| ENSP00000052754 | DCN      | 0.5947 |
| ENSP00000382004 | CTNND1   | 0.5947 |
| ENSP00000264010 | CTCF     | 0.5947 |
| ENSP00000370938 | CDK8     | 0.5947 |
| ENSP00000245451 | BMP4     | 0.5947 |
| ENSP00000257749 | BACH2    | 0.5947 |
| ENSP00000341071 | ARHGEF3  | 0.5947 |
| ENSP00000371897 | ARHGAP5  | 0.5947 |
| ENSP00000260526 | ARHGAP29 | 0.5947 |
| ENSP00000350199 | AP1B1    | 0.5947 |
| ENSP00000421592 | ALYREF   | 0.5947 |
| ENSP00000216194 | ADSL     | 0.5947 |
| ENSP00000355645 | ACTA1    | 0.5947 |
| ENSP00000375977 | XRCC5    | 0.5921 |
| ENSP00000457230 | WWOX     | 0.5921 |
| ENSP00000345195 | UBQLN2   | 0.5921 |
| ENSP00000200457 | TRIP6    | 0.5921 |
| ENSP00000296795 | TLR3     | 0.5921 |
| ENSP00000358635 | SYNCRIP  | 0.5921 |
| ENSP00000365877 | SUV39H1  | 0.5921 |
| ENSP00000315768 | STAT2    | 0.5921 |
| ENSP00000229390 | SRSF9    | 0.5921 |
| ENSP00000357130 | SPTA1    | 0.5921 |
| ENSP00000400591 | SNRPE    | 0.5921 |
| ENSP00000322457 | SIAH2    | 0.5921 |
| ENSP00000435412 | RPS6KA1  | 0.5921 |
| ENSP00000382697 | ROCK1    | 0.5921 |



|                 |         |        |
|-----------------|---------|--------|
| ENSP00000288199 | RNF111  | 0.5921 |
| ENSP00000361021 | PTEN    | 0.5921 |
| ENSP00000263125 | PRKCQ   | 0.5921 |
| ENSP00000314949 | POLR2A  | 0.5921 |
| ENSP00000300093 | PLK1    | 0.5921 |
| ENSP00000441875 | PHB2    | 0.5921 |
| ENSP00000220597 | PAG1    | 0.5921 |
| ENSP00000327801 | P4HB    | 0.5921 |
| ENSP00000325819 | NR2F1   | 0.5921 |
| ENSP00000396620 | NFYC    | 0.5921 |
| ENSP00000358815 | NEURL1B | 0.5921 |
| ENSP00000332643 | NDN     | 0.5921 |
| ENSP00000318195 | NCL     | 0.5921 |
| ENSP00000381599 | MX1     | 0.5921 |
| ENSP00000368174 | MCM8    | 0.5921 |
| ENSP00000311005 | MAPK7   | 0.5921 |
| ENSP00000296509 | MAD2L1  | 0.5921 |
| ENSP00000390651 | IRAK4   | 0.5921 |
| ENSP00000355140 | HOXB1   | 0.5921 |
| ENSP00000302967 | HDAC3   | 0.5921 |
| ENSP00000294117 | GNG3    | 0.5921 |
| ENSP00000262958 | GNA15   | 0.5921 |
| ENSP00000386200 | FOXP2   | 0.5921 |
| ENSP00000334472 | FOXE3   | 0.5921 |
| ENSP00000264498 | FGF2    | 0.5921 |
| ENSP00000290246 | ELMO2   | 0.5921 |
| ENSP00000385269 | ELAVL1  | 0.5921 |
| ENSP00000269349 | EIF4A3  | 0.5921 |
| ENSP00000391944 | EEF1D   | 0.5921 |
| ENSP00000352516 | DNMT1   | 0.5921 |
| ENSP00000286648 | DCK     | 0.5921 |
| ENSP00000365782 | CEP78   | 0.5921 |
| ENSP00000362613 | CDX4    | 0.5921 |
| ENSP00000276925 | CDKN2B  | 0.5921 |
| ENSP00000222005 | CDC37   | 0.5921 |
| ENSP00000330237 | CASP9   | 0.5921 |
| ENSP00000349467 | CALM1   | 0.5921 |
| ENSP00000414303 | BDNF    | 0.5921 |
| ENSP00000318585 | BACE1   | 0.5921 |
| ENSP00000320485 | ARID1A  | 0.5921 |
| ENSP00000242057 | AHR     | 0.5921 |
| ENSP00000312618 | ACAD9   | 0.5921 |
| ENSP00000381739 | WNT8A   | 0.5895 |
| ENSP00000262640 | VAMP7   | 0.5895 |
| ENSP00000381045 | UBE3A   | 0.5895 |
| ENSP00000291552 | U2AF1   | 0.5895 |
| ENSP00000166345 | TRIP13  | 0.5895 |
| ENSP00000246957 | TRAP1   | 0.5895 |
| ENSP00000312143 | TNS3    | 0.5895 |
| ENSP00000246112 | TLE6    | 0.5895 |
| ENSP00000201031 | TFAP2C  | 0.5895 |
| ENSP00000252996 | TAF4    | 0.5895 |
| ENSP00000295987 | SYN1    | 0.5895 |

|                 |         |        |
|-----------------|---------|--------|
| ENSP00000398273 | SOX5    | 0.5895 |
| ENSP00000373637 | SMYD3   | 0.5895 |
| ENSP00000441954 | SMAD5   | 0.5895 |
| ENSP00000280551 | SEC24D  | 0.5895 |
| ENSP00000262752 | RPS6KA6 | 0.5895 |
| ENSP00000349959 | RICTOR  | 0.5895 |
| ENSP00000338629 | RERE    | 0.5895 |
| ENSP00000377947 | RARG    | 0.5895 |
| ENSP00000217185 | PTK6    | 0.5895 |
| ENSP00000424595 | PRPS1L1 | 0.5895 |
| ENSP00000312735 | POLR2B  | 0.5895 |
| ENSP00000263246 | PACSIN2 | 0.5895 |
| ENSP00000455507 | OBSCN   | 0.5895 |
| ENSP00000246672 | NR1D1   | 0.5895 |
| ENSP00000264051 | NGEF    | 0.5895 |
| ENSP00000250495 | NEDD8   | 0.5895 |
| ENSP00000354251 | NCKAP1  | 0.5895 |
| ENSP00000356505 | NCF2    | 0.5895 |
| ENSP00000420477 | NACAD   | 0.5895 |
| ENSP00000279022 | MYL9    | 0.5895 |
| ENSP00000384330 | MYH8    | 0.5895 |
| ENSP00000258455 | MRPS9   | 0.5895 |
| ENSP00000216122 | MCM5    | 0.5895 |
| ENSP00000265056 | MCM2    | 0.5895 |
| ENSP00000354649 | MAGT1   | 0.5895 |
| ENSP00000265165 | LEF1    | 0.5895 |
| ENSP00000296585 | ITGA2   | 0.5895 |
| ENSP00000349770 | IRF5    | 0.5895 |
| ENSP00000352575 | INPP5D  | 0.5895 |
| ENSP00000362115 | INPP5B  | 0.5895 |
| ENSP00000268035 | IGF1R   | 0.5895 |
| ENSP00000331201 | HGS     | 0.5895 |
| ENSP00000365807 | GNA14   | 0.5895 |
| ENSP00000296805 | GFM2    | 0.5895 |
| ENSP00000369538 | GDI2    | 0.5895 |
| ENSP00000346886 | GABPA   | 0.5895 |
| ENSP00000378529 | FZR1    | 0.5895 |
| ENSP00000361672 | FOXO6   | 0.5895 |
| ENSP00000352414 | FGF17   | 0.5895 |
| ENSP00000265094 | FBXW11  | 0.5895 |
| ENSP00000239938 | EGR1    | 0.5895 |
| ENSP00000005340 | DVL2    | 0.5895 |
| ENSP00000078445 | CREB3L3 | 0.5895 |
| ENSP00000258424 | COX5B   | 0.5895 |
| ENSP00000331902 | COL4A5  | 0.5895 |
| ENSP00000278935 | CEP164  | 0.5895 |
| ENSP00000231021 | CDH9    | 0.5895 |
| ENSP00000332293 | ASCL2   | 0.5895 |
| ENSP00000350297 | ASAP1   | 0.5895 |
| ENSP00000250617 | ARHGEF6 | 0.5895 |
| ENSP00000298316 | ARF6    | 0.5895 |
| ENSP00000332744 | ALX4    | 0.5895 |
| ENSP00000363965 | ALPL    | 0.5895 |

|                 |         |        |
|-----------------|---------|--------|
| ENSP00000262211 | SGK3    | 0.5895 |
| ENSP00000322439 | TUFM    | 0.5868 |
| ENSP00000262395 | TRAF4   | 0.5868 |
| ENSP00000327959 | TGIF1   | 0.5868 |
| ENSP00000257566 | TBX3    | 0.5868 |
| ENSP00000258962 | SRSF1   | 0.5868 |
| ENSP00000341327 | SOCS4   | 0.5868 |
| ENSP00000472847 | SARS2   | 0.5868 |
| ENSP00000262133 | RBL2    | 0.5868 |
| ENSP00000311857 | PTPN2   | 0.5868 |
| ENSP00000304350 | PRPF8   | 0.5868 |
| ENSP00000309591 | PRKACA  | 0.5868 |
| ENSP00000324804 | PPP2R1A | 0.5868 |
| ENSP00000270861 | PLK4    | 0.5868 |
| ENSP00000247970 | PIN1    | 0.5868 |
| ENSP00000254657 | PER2    | 0.5868 |
| ENSP00000362824 | OGT     | 0.5868 |
| ENSP00000253727 | NR1H2   | 0.5868 |
| ENSP00000369519 | MTAP    | 0.5868 |
| ENSP00000263056 | MAP3K8  | 0.5868 |
| ENSP00000357283 | LMNA    | 0.5868 |
| ENSP00000265713 | KAT6A   | 0.5868 |
| ENSP00000261023 | ITGAV   | 0.5868 |
| ENSP00000295731 | IHH     | 0.5868 |
| ENSP00000324173 | HSPA5   | 0.5868 |
| ENSP00000283179 | HNRNPU  | 0.5868 |
| ENSP00000368698 | HIVEP1  | 0.5868 |
| ENSP00000282728 | HHEX    | 0.5868 |
| ENSP00000417401 | HELZ2   | 0.5868 |
| ENSP00000231121 | HAND1   | 0.5868 |
| ENSP00000264424 | GUCY1B3 | 0.5868 |
| ENSP00000354040 | GTPBP4  | 0.5868 |
| ENSP00000308610 | GPD2    | 0.5868 |
| ENSP00000358867 | GNAI3   | 0.5868 |
| ENSP00000264895 | FRAS1   | 0.5868 |
| ENSP00000322909 | FHL2    | 0.5868 |
| ENSP00000267843 | FGF7    | 0.5868 |
| ENSP00000294312 | FGF19   | 0.5868 |
| ENSP00000000442 | ESRRA   | 0.5868 |
| ENSP00000419449 | EIF1    | 0.5868 |
| ENSP00000236957 | EEF1B2  | 0.5868 |
| ENSP00000378735 | DNAJC6  | 0.5868 |
| ENSP00000341692 | DAP3    | 0.5868 |
| ENSP00000271651 | CTSK    | 0.5868 |
| ENSP00000290921 | CTBP1   | 0.5868 |
| ENSP00000304408 | COL3A1  | 0.5868 |
| ENSP00000355370 | CNTF    | 0.5868 |
| ENSP00000359663 | CD40LG  | 0.5868 |
| ENSP00000293272 | CCL5    | 0.5868 |
| ENSP00000367408 | CASK    | 0.5868 |
| ENSP00000339740 | CAMK2D  | 0.5868 |
| ENSP00000379098 | CAMK2B  | 0.5868 |
| ENSP00000369497 | BRCA2   | 0.5868 |

|                 |          |        |
|-----------------|----------|--------|
| ENSP00000220531 | BLOC1S6  | 0.5868 |
| ENSP00000316779 | BIN1     | 0.5868 |
| ENSP00000286639 | BATF     | 0.5868 |
| ENSP00000452780 | B2M      | 0.5868 |
| ENSP00000218548 | ATP12A   | 0.5868 |
| ENSP00000393539 | ARHGAP23 | 0.5868 |
| ENSP00000252699 | ACTN4    | 0.5868 |
| ENSP00000171887 | TNS1     | 0.5842 |
| ENSP00000239849 | TNFSF11  | 0.5842 |
| ENSP00000162749 | TNFRSF1A | 0.5842 |
| ENSP00000358931 | TKTL1    | 0.5842 |
| ENSP00000366863 | TBC1D4   | 0.5842 |
| ENSP00000240327 | SPOP     | 0.5842 |
| ENSP00000262435 | SMURF2   | 0.5842 |
| ENSP00000354621 | SMURF1   | 0.5842 |
| ENSP00000263121 | SMARCB1  | 0.5842 |
| ENSP00000262519 | SETD1A   | 0.5842 |
| ENSP00000348068 | SERPINA1 | 0.5842 |
| ENSP00000357998 | SEC63    | 0.5842 |
| ENSP00000321845 | SEC24C   | 0.5842 |
| ENSP00000312122 | SEC13    | 0.5842 |
| ENSP00000337632 | SARNP    | 0.5842 |
| ENSP00000292123 | SAFB     | 0.5842 |
| ENSP00000374036 | RPH3A    | 0.5842 |
| ENSP00000341243 | RBPJL    | 0.5842 |
| ENSP00000369424 | RBBP7    | 0.5842 |
| ENSP00000286364 | RASA2    | 0.5842 |
| ENSP00000231572 | RARS     | 0.5842 |
| ENSP00000367830 | PRKCZ    | 0.5842 |
| ENSP00000351410 | PRKAR1A  | 0.5842 |
| ENSP00000418447 | PPP2CA   | 0.5842 |
| ENSP00000296440 | PLXNB1   | 0.5842 |
| ENSP00000206542 | OSGEP    | 0.5842 |
| ENSP00000363216 | OGDHL    | 0.5842 |
| ENSP00000265371 | NRP1     | 0.5842 |
| ENSP00000327213 | NRIP1    | 0.5842 |
| ENSP00000353452 | MYLK     | 0.5842 |
| ENSP00000241600 | MRPS2    | 0.5842 |
| ENSP00000325863 | MRE11A   | 0.5842 |
| ENSP00000395535 | MECP2    | 0.5842 |
| ENSP00000358335 | MAP3K7   | 0.5842 |
| ENSP00000262445 | MAP2K4   | 0.5842 |
| ENSP00000363970 | MAP1LC3A | 0.5842 |
| ENSP00000340684 | MAOA     | 0.5842 |
| ENSP00000392466 | LDB1     | 0.5842 |
| ENSP00000377954 | LARS     | 0.5842 |
| ENSP00000171111 | KEAP1    | 0.5842 |
| ENSP00000200181 | ITGB4    | 0.5842 |
| ENSP00000305244 | IRX1     | 0.5842 |
| ENSP00000357178 | INSRR    | 0.5842 |
| ENSP00000310219 | HSPA6    | 0.5842 |
| ENSP00000243108 | HOXC6    | 0.5842 |
| ENSP00000304229 | HINT1    | 0.5842 |

|                 |         |        |
|-----------------|---------|--------|
| ENSP00000355689 | GUK1    | 0.5842 |
| ENSP00000298743 | GAS1    | 0.5842 |
| ENSP00000326371 | FOXC2   | 0.5842 |
| ENSP00000264748 | FGFRL1  | 0.5842 |
| ENSP00000258106 | EMX1    | 0.5842 |
| ENSP00000392094 | EFTUD2  | 0.5842 |
| ENSP00000368686 | E2F4    | 0.5842 |
| ENSP00000370376 | DUT     | 0.5842 |
| ENSP00000325817 | CYFIP2  | 0.5842 |
| ENSP00000357981 | CTSS    | 0.5842 |
| ENSP00000315791 | CSTF3   | 0.5842 |
| ENSP00000406751 | CRY2    | 0.5842 |
| ENSP00000247655 | COX7C   | 0.5842 |
| ENSP00000249923 | COPB1   | 0.5842 |
| ENSP00000222792 | CHN2    | 0.5842 |
| ENSP00000264982 | CEP70   | 0.5842 |
| ENSP00000289746 | CDH15   | 0.5842 |
| ENSP00000434614 | CDC27   | 0.5842 |
| ENSP00000308450 | CDC20   | 0.5842 |
| ENSP00000274026 | CCNA2   | 0.5842 |
| ENSP00000368104 | BMP2    | 0.5842 |
| ENSP00000262623 | ATP4A   | 0.5842 |
| ENSP00000409581 | ARRB1   | 0.5842 |
| ENSP00000228945 | ARHGDIB | 0.5842 |
| ENSP00000310491 | ARHGAP1 | 0.5842 |
| ENSP00000220592 | AGO2    | 0.5842 |
| ENSP00000367220 | ACTR2   | 0.5842 |
| ENSP00000326630 | ZFPM1   | 0.5816 |
| ENSP00000211998 | VCL     | 0.5816 |
| ENSP00000379500 | UEVLD   | 0.5816 |
| ENSP00000352645 | TYW1    | 0.5816 |
| ENSP00000328973 | TSPO    | 0.5816 |
| ENSP00000241261 | TNFSF10 | 0.5816 |
| ENSP00000364133 | TGFBR1  | 0.5816 |
| ENSP00000377265 | TFAP2B  | 0.5816 |
| ENSP00000319756 | TENC1   | 0.5816 |
| ENSP00000265304 | SSBP1   | 0.5816 |
| ENSP00000216774 | SRP54   | 0.5816 |
| ENSP00000310301 | SP3     | 0.5816 |
| ENSP00000260653 | SIX3    | 0.5816 |
| ENSP00000247182 | SIX1    | 0.5816 |
| ENSP00000332995 | SETD8   | 0.5816 |
| ENSP00000318094 | SCMH1   | 0.5816 |
| ENSP00000433821 | RPS3    | 0.5816 |
| ENSP00000435777 | RPS13   | 0.5816 |
| ENSP00000437142 | RPP14   | 0.5816 |
| ENSP00000384892 | RIMS2   | 0.5816 |
| ENSP00000380271 | RAPGEF4 | 0.5816 |
| ENSP00000164139 | PYGM    | 0.5816 |
| ENSP00000368318 | PUSL1   | 0.5816 |
| ENSP00000341189 | PTK2    | 0.5816 |
| ENSP00000268835 | PRPSAP2 | 0.5816 |
| ENSP00000302150 | PRL     | 0.5816 |

|                 |           |        |
|-----------------|-----------|--------|
| ENSP00000336831 | PLS1      | 0.5816 |
| ENSP00000367570 | PHF11     | 0.5816 |
| ENSP00000363640 | PHF1      | 0.5816 |
| ENSP00000360154 | OCRL      | 0.5816 |
| ENSP00000356331 | NR5A2     | 0.5816 |
| ENSP00000387946 | NR1H3     | 0.5816 |
| ENSP00000275015 | NFKBIE    | 0.5816 |
| ENSP00000240922 | NAA50     | 0.5816 |
| ENSP00000401678 | MYOCD     | 0.5816 |
| ENSP00000262269 | MYH14     | 0.5816 |
| ENSP00000226207 | MYH1      | 0.5816 |
| ENSP00000265081 | MSH3      | 0.5816 |
| ENSP00000343867 | MRRF      | 0.5816 |
| ENSP00000263390 | MED26     | 0.5816 |
| ENSP00000305059 | MAP1LC3B2 | 0.5816 |
| ENSP00000356357 | LHX9      | 0.5816 |
| ENSP00000269576 | KRT10     | 0.5816 |
| ENSP00000248553 | HSPB1     | 0.5816 |
| ENSP00000420914 | HSD17B4   | 0.5816 |
| ENSP00000315949 | HOXD8     | 0.5816 |
| ENSP00000365439 | HNRNPK    | 0.5816 |
| ENSP00000437409 | GRAPL     | 0.5816 |
| ENSP00000314499 | GAK       | 0.5816 |
| ENSP00000419266 | EVX1      | 0.5816 |
| ENSP00000340660 | ELSPBP1   | 0.5816 |
| ENSP00000312185 | ELMO1     | 0.5816 |
| ENSP00000362688 | EIF3I     | 0.5816 |
| ENSP00000358140 | EIF3A     | 0.5816 |
| ENSP00000319635 | CXCR2     | 0.5816 |
| ENSP00000303939 | CTLA4     | 0.5816 |
| ENSP00000353654 | COL4A2    | 0.5816 |
| ENSP00000320949 | CNOT1     | 0.5816 |
| ENSP00000245816 | CLPP      | 0.5816 |
| ENSP00000283635 | CD8A      | 0.5816 |
| ENSP00000332049 | CD86      | 0.5816 |
| ENSP00000262643 | CCNE1     | 0.5816 |
| ENSP00000312664 | CASP2     | 0.5816 |
| ENSP00000410076 | CASP1     | 0.5816 |
| ENSP00000356919 | ATF6      | 0.5816 |
| ENSP00000376204 | ASH1L     | 0.5816 |
| ENSP00000374357 | ARNTL     | 0.5816 |
| ENSP00000316845 | ARHGEF4   | 0.5816 |
| ENSP00000377233 | ARAP1     | 0.5816 |
| ENSP00000298545 | AK8       | 0.5816 |
| ENSP00000263238 | ACTR3     | 0.5816 |
| ENSP00000355537 | ACTN2     | 0.5816 |
| ENSP00000242592 | ACADS     | 0.5816 |
| ENSP00000271015 | BCL10     | 0.5816 |
| ENSP00000314214 | VAMP2     | 0.5789 |
| ENSP00000302239 | USP8      | 0.5789 |
| ENSP00000320797 | TUBD1     | 0.5789 |
| ENSP00000216160 | TAB1      | 0.5789 |
| ENSP00000326261 | SRRM1     | 0.5789 |

|                 |          |        |
|-----------------|----------|--------|
| ENSP00000261531 | SNW1     | 0.5789 |
| ENSP00000262613 | SLC9A3R1 | 0.5789 |
| ENSP00000267197 | SETD1B   | 0.5789 |
| ENSP00000306881 | SEC23A   | 0.5789 |
| ENSP00000226218 | SEBOX    | 0.5789 |
| ENSP00000427015 | RPS6KA2  | 0.5789 |
| ENSP00000377640 | RPL24    | 0.5789 |
| ENSP00000055077 | RFC2     | 0.5789 |
| ENSP00000342830 | RDX      | 0.5789 |
| ENSP00000310244 | RASGRP1  | 0.5789 |
| ENSP00000309871 | RACGAP1  | 0.5789 |
| ENSP00000447300 | RAB3IP   | 0.5789 |
| ENSP00000262193 | PSMB1    | 0.5789 |
| ENSP00000265563 | PRKAR2A  | 0.5789 |
| ENSP00000384610 | PNPLA7   | 0.5789 |
| ENSP00000265340 | PITX1    | 0.5789 |
| ENSP00000378307 | PBRM1    | 0.5789 |
| ENSP00000250416 | PARP2    | 0.5789 |
| ENSP00000219255 | PARD6A   | 0.5789 |
| ENSP00000222673 | OGDH     | 0.5789 |
| ENSP00000007516 | NDUFAB1  | 0.5789 |
| ENSP00000300119 | MYO1A    | 0.5789 |
| ENSP00000263205 | MED15    | 0.5789 |
| ENSP00000229854 | MCM3     | 0.5789 |
| ENSP00000262948 | MAP2K2   | 0.5789 |
| ENSP00000294816 | LMX1A    | 0.5789 |
| ENSP00000302100 | LGALS4   | 0.5789 |
| ENSP00000265537 | LARS2    | 0.5789 |
| ENSP00000307156 | LAMB2    | 0.5789 |
| ENSP00000305702 | KCTD19   | 0.5789 |
| ENSP00000380073 | IRF9     | 0.5789 |
| ENSP00000329411 | IRF7     | 0.5789 |
| ENSP00000275525 | IGFBP1   | 0.5789 |
| ENSP00000219700 | HMOX2    | 0.5789 |
| ENSP00000430432 | HDAC2    | 0.5789 |
| ENSP00000282561 | GJA1     | 0.5789 |
| ENSP00000304286 | FOXI1    | 0.5789 |
| ENSP00000370256 | FOXC1    | 0.5789 |
| ENSP00000347294 | EYA4     | 0.5789 |
| ENSP00000340691 | EIF4EBP1 | 0.5789 |
| ENSP00000310040 | EIF3F    | 0.5789 |
| ENSP00000320516 | EHD1     | 0.5789 |
| ENSP00000257600 | DTX1     | 0.5789 |
| ENSP00000383178 | DIAPH3   | 0.5789 |
| ENSP00000362687 | DDX50    | 0.5789 |
| ENSP00000418191 | CTNNA2   | 0.5789 |
| ENSP00000297848 | COL14A1  | 0.5789 |
| ENSP00000448012 | CEP290   | 0.5789 |
| ENSP00000360532 | CDC5L    | 0.5789 |
| ENSP00000405726 | CDC45    | 0.5789 |
| ENSP00000339191 | CAV1     | 0.5789 |
| ENSP00000311032 | CASP3    | 0.5789 |
| ENSP00000381412 | CAMK2A   | 0.5789 |

|                 |               |        |
|-----------------|---------------|--------|
| ENSP00000216911 | AURKA         | 0.5789 |
| ENSP00000262030 | ATP5B         | 0.5789 |
| ENSP00000364839 | ASXL1         | 0.5789 |
| ENSP00000262942 | ARPC1A        | 0.5789 |
| ENSP00000354837 | ARHGEF2       | 0.5789 |
| ENSP00000255194 | AP3B1         | 0.5789 |
| ENSP00000264448 | ALMS1         | 0.5789 |
| ENSP00000262713 | AJUBA         | 0.5789 |
| ENSP00000224764 | BMPR1A        | 0.5789 |
| ENSP00000265428 | WWP1          | 0.5763 |
| ENSP00000440586 | USO1          | 0.5763 |
| ENSP00000247668 | TRAF2         | 0.5763 |
| ENSP00000286827 | TIAM1         | 0.5763 |
| ENSP00000364519 | TFDP1         | 0.5763 |
| ENSP00000296702 | TCERG1        | 0.5763 |
| ENSP00000343515 | TCEA2         | 0.5763 |
| ENSP00000247219 | TBPL2         | 0.5763 |
| ENSP00000348128 | SVIL          | 0.5763 |
| ENSP00000368831 | SNX2          | 0.5763 |
| ENSP00000298532 | SNAPC4        | 0.5763 |
| ENSP00000262158 | SMAD7         | 0.5763 |
| ENSP00000298428 | SEC61A2       | 0.5763 |
| ENSP00000464383 | RP11-599B13.6 | 0.5763 |
| ENSP00000220751 | RIPK2         | 0.5763 |
| ENSP00000311747 | RBM14         | 0.5763 |
| ENSP00000247470 | PYCARD        | 0.5763 |
| ENSP00000228307 | PXN           | 0.5763 |
| ENSP00000381504 | PRPS2         | 0.5763 |
| ENSP00000351686 | PRDM10        | 0.5763 |
| ENSP00000221859 | POLR2I        | 0.5763 |
| ENSP00000262741 | PIK3R3        | 0.5763 |
| ENSP00000420294 | PHC3          | 0.5763 |
| ENSP00000252891 | NUMBL         | 0.5763 |
| ENSP00000385142 | NRXN1         | 0.5763 |
| ENSP00000312988 | NFKBIB        | 0.5763 |
| ENSP00000355966 | NEK2          | 0.5763 |
| ENSP00000380334 | NCF4          | 0.5763 |
| ENSP00000354554 | MT-CYB        | 0.5763 |
| ENSP00000233146 | MSH2          | 0.5763 |
| ENSP00000305682 | MRPL39        | 0.5763 |
| ENSP00000298048 | MELK          | 0.5763 |
| ENSP00000333685 | MAPK11        | 0.5763 |
| ENSP00000351908 | MAP3K5        | 0.5763 |
| ENSP00000366330 | KLF9          | 0.5763 |
| ENSP00000441691 | ITGAM         | 0.5763 |
| ENSP00000404121 | ILF3          | 0.5763 |
| ENSP00000347184 | HTT           | 0.5763 |
| ENSP00000225648 | HOXB6         | 0.5763 |
| ENSP00000319690 | HNRNPC        | 0.5763 |
| ENSP00000216117 | HMOX1         | 0.5763 |
| ENSP00000369871 | HAUS6         | 0.5763 |
| ENSP00000302728 | GUSB          | 0.5763 |
| ENSP00000362924 | GSN           | 0.5763 |



|                 |          |        |
|-----------------|----------|--------|
| ENSP00000238558 | GSC      | 0.5763 |
| ENSP00000323880 | FOXJ1    | 0.5763 |
| ENSP00000311697 | FGF5     | 0.5763 |
| ENSP00000262464 | FBN2     | 0.5763 |
| ENSP00000333640 | EYA2     | 0.5763 |
| ENSP00000234198 | DLX2     | 0.5763 |
| ENSP00000417078 | DHX36    | 0.5763 |
| ENSP00000236671 | CTSD     | 0.5763 |
| ENSP00000361290 | COL4A6   | 0.5763 |
| ENSP00000356623 | CITED2   | 0.5763 |
| ENSP00000262127 | CEP76    | 0.5763 |
| ENSP00000354782 | CD247    | 0.5763 |
| ENSP00000349238 | CCDC88B  | 0.5763 |
| ENSP00000384490 | CBX6     | 0.5763 |
| ENSP00000209875 | CBX5     | 0.5763 |
| ENSP00000319060 | CAMK2G   | 0.5763 |
| ENSP00000287598 | BUB1B    | 0.5763 |
| ENSP00000267953 | BCL2A1   | 0.5763 |
| ENSP00000396954 | ATF5     | 0.5763 |
| ENSP00000252725 | ARPC1B   | 0.5763 |
| ENSP00000362442 | ARHGAP40 | 0.5763 |
| ENSP00000378152 | AKTIP    | 0.5763 |
| ENSP00000410186 | AK9      | 0.5763 |
| ENSP00000340361 | ACVR2B   | 0.5763 |
| ENSP00000351777 | VCP      | 0.5737 |
| ENSP00000261965 | TUBGCP3  | 0.5737 |
| ENSP00000343764 | TTN      | 0.5737 |
| ENSP00000254436 | TRIM21   | 0.5737 |
| ENSP00000356286 | TNNT2    | 0.5737 |
| ENSP00000398698 | TNF      | 0.5737 |
| ENSP00000355471 | TFB2M    | 0.5737 |
| ENSP00000431376 | TATDN3   | 0.5737 |
| ENSP00000265112 | TARS     | 0.5737 |
| ENSP00000372547 | SRY      | 0.5737 |
| ENSP00000270142 | SOD1     | 0.5737 |
| ENSP00000243563 | SNRPA    | 0.5737 |
| ENSP00000370083 | SMN1     | 0.5737 |
| ENSP00000254480 | SMARCC1  | 0.5737 |
| ENSP00000331019 | RPS27L   | 0.5737 |
| ENSP00000359685 | PTP4A1   | 0.5737 |
| ENSP00000359719 | PRKACB   | 0.5737 |
| ENSP00000378306 | PPP3CB   | 0.5737 |
| ENSP00000362329 | PPA1     | 0.5737 |
| ENSP00000362103 | POU3F1   | 0.5737 |
| ENSP00000339826 | PIK3AP1  | 0.5737 |
| ENSP00000313490 | PFAS     | 0.5737 |
| ENSP00000253754 | PDLIM4   | 0.5737 |
| ENSP00000368438 | PCNA     | 0.5737 |
| ENSP00000325421 | PARL     | 0.5737 |
| ENSP00000217073 | PABPC1L  | 0.5737 |
| ENSP00000305503 | NUP62    | 0.5737 |
| ENSP00000240423 | NCAPH    | 0.5737 |
| ENSP00000261681 | MPP5     | 0.5737 |

|                 |          |        |
|-----------------|----------|--------|
| ENSP00000203630 | MLF2     | 0.5737 |
| ENSP00000229794 | MAPK14   | 0.5737 |
| ENSP00000381066 | MAP2K7   | 0.5737 |
| ENSP00000292599 | MAML1    | 0.5737 |
| ENSP00000333298 | LAMP1    | 0.5737 |
| ENSP00000324532 | LAMA3    | 0.5737 |
| ENSP00000321584 | IMPDH2   | 0.5737 |
| ENSP00000299421 | ILK      | 0.5737 |
| ENSP00000264563 | IL11     | 0.5737 |
| ENSP00000349437 | IGF2R    | 0.5737 |
| ENSP00000367972 | ID4      | 0.5737 |
| ENSP00000364114 | HLA-DRB5 | 0.5737 |
| ENSP00000260983 | HECW2    | 0.5737 |
| ENSP00000216341 | GZMB     | 0.5737 |
| ENSP00000251337 | GNAT2    | 0.5737 |
| ENSP00000314508 | GBA      | 0.5737 |
| ENSP00000372326 | FECH     | 0.5737 |
| ENSP00000353564 | EXOC8    | 0.5737 |
| ENSP00000272427 | EXOC6B   | 0.5737 |
| ENSP00000323377 | EXOC3    | 0.5737 |
| ENSP00000451080 | ERH      | 0.5737 |
| ENSP00000265720 | DUS4L    | 0.5737 |
| ENSP00000309539 | DPYSL2   | 0.5737 |
| ENSP00000333363 | DNAH8    | 0.5737 |
| ENSP00000276297 | DLC1     | 0.5737 |
| ENSP00000321711 | DIS3L    | 0.5737 |
| ENSP00000356520 | DHX9     | 0.5737 |
| ENSP00000389140 | DCC      | 0.5737 |
| ENSP00000350359 | CREB5    | 0.5737 |
| ENSP00000393912 | COPG2    | 0.5737 |
| ENSP00000253233 | C12orf65 | 0.5737 |
| ENSP00000305714 | BMP1     | 0.5737 |
| ENSP00000301633 | BIRC5    | 0.5737 |
| ENSP00000353878 | BAK1     | 0.5737 |
| ENSP00000260952 | ASNSD1   | 0.5737 |
| ENSP00000000233 | ARF5     | 0.5737 |
| ENSP00000263270 | AP2S1    | 0.5737 |
| ENSP00000388996 | AP1M1    | 0.5737 |
| ENSP00000382120 | AIFM3    | 0.5737 |
| ENSP00000261017 | ABI2     | 0.5737 |
| ENSP00000306983 | YEATS2   | 0.5711 |
| ENSP00000352257 | XRCC6    | 0.5711 |
| ENSP00000353847 | WWTR1    | 0.5711 |
| ENSP00000369531 | UBQLNL   | 0.5711 |
| ENSP00000376500 | TRAF3    | 0.5711 |
| ENSP00000362994 | TRAF1    | 0.5711 |
| ENSP00000349705 | TOP3B    | 0.5711 |
| ENSP00000321636 | TOP3A    | 0.5711 |
| ENSP00000438262 | TJP2     | 0.5711 |
| ENSP00000365534 | THNSL1   | 0.5711 |
| ENSP00000221930 | TGFB1    | 0.5711 |
| ENSP00000356134 | TFB1M    | 0.5711 |
| ENSP00000313752 | SSNA1    | 0.5711 |

|                 |         |        |
|-----------------|---------|--------|
| ENSP00000362900 | SRSF4   | 0.5711 |
| ENSP00000216373 | SOS2    | 0.5711 |
| ENSP00000355136 | SORBS1  | 0.5711 |
| ENSP00000377409 | SFTPBP  | 0.5711 |
| ENSP00000383145 | SFI1    | 0.5711 |
| ENSP00000246868 | SBDS    | 0.5711 |
| ENSP00000225577 | RPS6KB1 | 0.5711 |
| ENSP00000296674 | RPS23   | 0.5711 |
| ENSP00000339027 | RPLP0   | 0.5711 |
| ENSP00000338671 | RHOBTB1 | 0.5711 |
| ENSP00000362592 | RBBP4   | 0.5711 |
| ENSP00000304447 | PTCRA   | 0.5711 |
| ENSP00000353415 | PRKAR1B | 0.5711 |
| ENSP00000012443 | PPP5C   | 0.5711 |
| ENSP00000221138 | PPP2CB  | 0.5711 |
| ENSP00000303754 | PPID    | 0.5711 |
| ENSP00000310928 | PPARD   | 0.5711 |
| ENSP00000281321 | POU4F2  | 0.5711 |
| ENSP00000347345 | POLR3H  | 0.5711 |
| ENSP00000368645 | POLR2J3 | 0.5711 |
| ENSP00000348163 | PLS3    | 0.5711 |
| ENSP00000392812 | PIK3R5  | 0.5711 |
| ENSP00000262971 | PIAS4   | 0.5711 |
| ENSP00000451040 | PGF     | 0.5711 |
| ENSP00000257770 | NT5E    | 0.5711 |
| ENSP00000300659 | NFATC3  | 0.5711 |
| ENSP00000242462 | NEUROG3 | 0.5711 |
| ENSP00000318472 | NCAM1   | 0.5711 |
| ENSP00000341992 | NANOS3  | 0.5711 |
| ENSP00000377867 | MST4    | 0.5711 |
| ENSP00000453793 | MEIS2   | 0.5711 |
| ENSP00000382423 | MAP3K1  | 0.5711 |
| ENSP00000302830 | MAEA    | 0.5711 |
| ENSP00000359573 | LMO4    | 0.5711 |
| ENSP00000366915 | KLF5    | 0.5711 |
| ENSP00000266041 | ITIH4   | 0.5711 |
| ENSP00000303242 | ITGB2   | 0.5711 |
| ENSP00000231449 | IL4     | 0.5711 |
| ENSP00000431512 | HSF1    | 0.5711 |
| ENSP00000320176 | HCLS1   | 0.5711 |
| ENSP00000309555 | HCFC1   | 0.5711 |
| ENSP00000230771 | HARS2   | 0.5711 |
| ENSP00000352565 | HAND2   | 0.5711 |
| ENSP00000370532 | GTF3A   | 0.5711 |
| ENSP00000341247 | GSPT2   | 0.5711 |
| ENSP00000381793 | GRB10   | 0.5711 |
| ENSP00000301838 | FADD    | 0.5711 |
| ENSP00000367992 | ESD     | 0.5711 |
| ENSP00000355890 | EPRS    | 0.5711 |
| ENSP00000242577 | DYNLL1  | 0.5711 |
| ENSP00000346120 | DDX21   | 0.5711 |
| ENSP00000255448 | DCLK1   | 0.5711 |
| ENSP00000358695 | CYB5R4  | 0.5711 |

|                 |          |        |
|-----------------|----------|--------|
| ENSP00000255641 | CSNK1G2  | 0.5711 |
| ENSP00000342056 | CS       | 0.5711 |
| ENSP00000271889 | CREB3L4  | 0.5711 |
| ENSP00000305613 | CPLX1    | 0.5711 |
| ENSP00000240316 | COIL     | 0.5711 |
| ENSP00000294053 | CLPB     | 0.5711 |
| ENSP00000299198 | CKB      | 0.5711 |
| ENSP00000380661 | CEP250   | 0.5711 |
| ENSP00000226279 | CD38     | 0.5711 |
| ENSP00000282356 | CAMK4    | 0.5711 |
| ENSP00000250244 | AP1M2    | 0.5711 |
| ENSP00000331268 | ANKRD45  | 0.5711 |
| ENSP00000217426 | AHCY     | 0.5711 |
| ENSP00000368678 | AGRN     | 0.5711 |
| ENSP00000349297 | ACADVL   | 0.5711 |
| ENSP00000354945 | MCM10    | 0.5711 |
| ENSP00000365514 | ZIC2     | 0.5684 |
| ENSP00000284273 | UBASH3B  | 0.5684 |
| ENSP00000354340 | UBA3     | 0.5684 |
| ENSP00000336712 | TNPO1    | 0.5684 |
| ENSP00000365048 | TNFSF13B | 0.5684 |
| ENSP00000233156 | TFPI     | 0.5684 |
| ENSP00000204517 | TFAP4    | 0.5684 |
| ENSP00000237316 | TCF21    | 0.5684 |
| ENSP00000261716 | TAOK1    | 0.5684 |
| ENSP00000286332 | TAB2     | 0.5684 |
| ENSP00000261205 | SYT1     | 0.5684 |
| ENSP00000222812 | STX1A    | 0.5684 |
| ENSP00000328023 | SRPR     | 0.5684 |
| ENSP00000354476 | SREBF2   | 0.5684 |
| ENSP00000343785 | SPRY1    | 0.5684 |
| ENSP00000265773 | SMARCA2  | 0.5684 |
| ENSP00000416293 | SLC2A1   | 0.5684 |
| ENSP00000228318 | SLC25A3  | 0.5684 |
| ENSP00000345492 | SH2B3    | 0.5684 |
| ENSP00000340608 | SGK2     | 0.5684 |
| ENSP00000386759 | SETD2    | 0.5684 |
| ENSP00000243253 | SEC61A1  | 0.5684 |
| ENSP00000262544 | SEC23B   | 0.5684 |
| ENSP00000346598 | RPSAP58  | 0.5684 |
| ENSP00000311028 | RPS14    | 0.5684 |
| ENSP00000261523 | RORA     | 0.5684 |
| ENSP00000342502 | PYCR2    | 0.5684 |
| ENSP00000310129 | PSMD2    | 0.5684 |
| ENSP00000229328 | PRKAB1   | 0.5684 |
| ENSP00000419970 | POR      | 0.5684 |
| ENSP00000264708 | POMC     | 0.5684 |
| ENSP00000243924 | PI3      | 0.5684 |
| ENSP00000352438 | PCBP2    | 0.5684 |
| ENSP00000363921 | PARD3    | 0.5684 |
| ENSP00000302886 | PA2G4    | 0.5684 |
| ENSP00000458954 | NUP88    | 0.5684 |
| ENSP00000242210 | NT5C3A   | 0.5684 |

|                 |           |        |
|-----------------|-----------|--------|
| ENSP00000274137 | NDUFS6    | 0.5684 |
| ENSP00000345892 | NDE1      | 0.5684 |
| ENSP00000222553 | NAMPT     | 0.5684 |
| ENSP00000326424 | NADSYN1   | 0.5684 |
| ENSP00000354499 | MT-CO1    | 0.5684 |
| ENSP00000354927 | MAP3K3    | 0.5684 |
| ENSP00000345083 | MAP2K3    | 0.5684 |
| ENSP00000421180 | MAML3     | 0.5684 |
| ENSP00000360525 | MAGOH     | 0.5684 |
| ENSP00000310596 | LSM1      | 0.5684 |
| ENSP00000263816 | LRP2      | 0.5684 |
| ENSP00000273317 | LIMD1     | 0.5684 |
| ENSP00000332455 | KPNA2     | 0.5684 |
| ENSP00000297792 | KDM1B     | 0.5684 |
| ENSP00000331608 | IRX3      | 0.5684 |
| ENSP00000305973 | HOXC4     | 0.5684 |
| ENSP00000221419 | HNRNPL    | 0.5684 |
| ENSP00000296503 | HMGB2     | 0.5684 |
| ENSP00000419038 | GFM1      | 0.5684 |
| ENSP00000299293 | FRS2      | 0.5684 |
| ENSP00000371138 | FKBP1A    | 0.5684 |
| ENSP00000370270 | ESRRB     | 0.5684 |
| ENSP00000256797 | ERN2      | 0.5684 |
| ENSP00000364119 | EIF2S2    | 0.5684 |
| ENSP00000239223 | DUSP1     | 0.5684 |
| ENSP00000341680 | DTNBP1    | 0.5684 |
| ENSP00000330460 | DDX59     | 0.5684 |
| ENSP00000233084 | DDX1      | 0.5684 |
| ENSP00000305651 | CXCL10    | 0.5684 |
| ENSP00000008527 | CRY1      | 0.5684 |
| ENSP00000434939 | CREB3L1   | 0.5684 |
| ENSP00000304102 | COPS6     | 0.5684 |
| ENSP00000429824 | CLINT1    | 0.5684 |
| ENSP00000312455 | CFLAR     | 0.5684 |
| ENSP00000256442 | CCNB1     | 0.5684 |
| ENSP00000225245 | CCL3      | 0.5684 |
| ENSP00000269397 | CBX4      | 0.5684 |
| ENSP00000302530 | BUB1      | 0.5684 |
| ENSP00000307208 | BPTF      | 0.5684 |
| ENSP00000357625 | BNIP3     | 0.5684 |
| ENSP00000367705 | BCOR      | 0.5684 |
| ENSP00000302898 | AURKC     | 0.5684 |
| ENSP00000463999 | AURKB     | 0.5684 |
| ENSP00000234396 | ATP6V1B1  | 0.5684 |
| ENSP00000391447 | ASXL2     | 0.5684 |
| ENSP00000228825 | ARPC3     | 0.5684 |
| ENSP00000349250 | ARL4A     | 0.5684 |
| ENSP00000392760 | ARHGAP11B | 0.5684 |
| ENSP00000367615 | APRT      | 0.5684 |
| ENSP00000349588 | ANK2      | 0.5684 |
| ENSP00000241416 | ACVR2A    | 0.5684 |
| ENSP00000248673 | ZFP36     | 0.5658 |
| ENSP00000403397 | ZDHHC17   | 0.5658 |

|                 |          |        |
|-----------------|----------|--------|
| ENSP00000161863 | YTHDC2   | 0.5658 |
| ENSP00000335055 | WASF3    | 0.5658 |
| ENSP00000441000 | VARF2    | 0.5658 |
| ENSP00000324897 | UBE2I    | 0.5658 |
| ENSP00000381717 | UBE2D2   | 0.5658 |
| ENSP00000388107 | UBA52    | 0.5658 |
| ENSP00000252936 | TUBGCP2  | 0.5658 |
| ENSP00000251968 | TSG101   | 0.5658 |
| ENSP00000313877 | TSFM     | 0.5658 |
| ENSP00000321810 | TRIT1    | 0.5658 |
| ENSP00000355208 | TPTE     | 0.5658 |
| ENSP00000358854 | TAF5     | 0.5658 |
| ENSP00000343023 | SP100    | 0.5658 |
| ENSP00000283131 | SMARCA5  | 0.5658 |
| ENSP00000328596 | SIX6     | 0.5658 |
| ENSP00000353622 | SIN3A    | 0.5658 |
| ENSP00000318868 | SHMT1    | 0.5658 |
| ENSP00000326477 | SETDB2   | 0.5658 |
| ENSP00000331736 | SELE     | 0.5658 |
| ENSP00000427926 | RHOBTB2  | 0.5658 |
| ENSP00000306124 | PRKCE    | 0.5658 |
| ENSP00000378323 | PPP3CA   | 0.5658 |
| ENSP00000360305 | PDLIM1   | 0.5658 |
| ENSP00000381740 | PARP3    | 0.5658 |
| ENSP00000281589 | PABPC3   | 0.5658 |
| ENSP00000340523 | NMNAT3   | 0.5658 |
| ENSP00000383199 | NEDD4L   | 0.5658 |
| ENSP00000261839 | MYO5C    | 0.5658 |
| ENSP00000354558 | MTOR     | 0.5658 |
| ENSP00000308845 | MRPS12   | 0.5658 |
| ENSP00000306548 | MRPL13   | 0.5658 |
| ENSP00000282486 | MBNL1    | 0.5658 |
| ENSP00000263025 | MAPK3    | 0.5658 |
| ENSP00000468348 | MAP2K6   | 0.5658 |
| ENSP00000268607 | MAP1LC3B | 0.5658 |
| ENSP00000360811 | LHX3     | 0.5658 |
| ENSP00000299601 | LEO1     | 0.5658 |
| ENSP00000252999 | LAMA5    | 0.5658 |
| ENSP00000328169 | JAG2     | 0.5658 |
| ENSP00000303351 | ITGB1    | 0.5658 |
| ENSP00000293379 | ITGA5    | 0.5658 |
| ENSP00000340737 | INTS12   | 0.5658 |
| ENSP00000231454 | IL5      | 0.5658 |
| ENSP00000358622 | IKBKG    | 0.5658 |
| ENSP00000366005 | HLA-A    | 0.5658 |
| ENSP00000385571 | HIPK2    | 0.5658 |
| ENSP00000296518 | GUCY1A3  | 0.5658 |
| ENSP00000222330 | GSK3A    | 0.5658 |
| ENSP00000381098 | GRIP1    | 0.5658 |
| ENSP00000416097 | GOLGA2   | 0.5658 |
| ENSP00000341344 | GGA1     | 0.5658 |
| ENSP00000223366 | GCK      | 0.5658 |
| ENSP00000359000 | GBF1     | 0.5658 |

|                 |                 |        |
|-----------------|-----------------|--------|
| ENSP00000451792 | GALT            | 0.5658 |
| ENSP00000324573 | FLII            | 0.5658 |
| ENSP00000380453 | ERMN            | 0.5658 |
| ENSP00000350265 | ENPP3           | 0.5658 |
| ENSP00000263791 | EIF2AK4         | 0.5658 |
| ENSP00000232905 | EIF1B           | 0.5658 |
| ENSP00000350876 | DNM3            | 0.5658 |
| ENSP00000450399 | DNM1L           | 0.5658 |
| ENSP00000379140 | CXCL12          | 0.5658 |
| ENSP00000345344 | CTSL1           | 0.5658 |
| ENSP00000298248 | CRYL1           | 0.5658 |
| ENSP00000308741 | CLOCK           | 0.5658 |
| ENSP00000295887 | CDS1            | 0.5658 |
| ENSP00000261211 | CDK17           | 0.5658 |
| ENSP00000264012 | CDH3            | 0.5658 |
| ENSP00000257857 | CD63            | 0.5658 |
| ENSP00000342681 | CD5             | 0.5658 |
| ENSP00000357858 | BUB3            | 0.5658 |
| ENSP00000357255 | BGLAP           | 0.5658 |
| ENSP00000284727 | ATP5G3          | 0.5658 |
| ENSP00000327214 | ATP13A2         | 0.5658 |
| ENSP00000281419 | ASAP2           | 0.5658 |
| ENSP00000307479 | ARNT2           | 0.5658 |
| ENSP00000337722 | ARL6            | 0.5658 |
| ENSP00000385720 | ARHGAP35        | 0.5658 |
| ENSP00000432016 | ANKHD1-EIF4EBP3 | 0.5658 |
| ENSP00000378191 | AIMP1           | 0.5658 |
| ENSP00000272065 | ACP1            | 0.5658 |
| ENSP00000354487 | ZEB1            | 0.5632 |
| ENSP00000268616 | ZCCHC14         | 0.5632 |
| ENSP00000306330 | YWHAG           | 0.5632 |
| ENSP00000282441 | YAP1            | 0.5632 |
| ENSP00000270288 | WTIP            | 0.5632 |
| ENSP00000224237 | VIM             | 0.5632 |
| ENSP00000306397 | UQCRFS1         | 0.5632 |
| ENSP00000316176 | UBE2N           | 0.5632 |
| ENSP00000262629 | TYROBP          | 0.5632 |
| ENSP00000336799 | TUBA1B          | 0.5632 |
| ENSP00000318944 | TRAF7           | 0.5632 |
| ENSP00000261652 | TNFRSF13B       | 0.5632 |
| ENSP00000262306 | TCEB2           | 0.5632 |
| ENSP00000177694 | TBX21           | 0.5632 |
| ENSP00000361824 | SPTAN1          | 0.5632 |
| ENSP00000218867 | SGCG            | 0.5632 |
| ENSP00000410715 | SFRP4           | 0.5632 |
| ENSP00000350894 | SERPINH1        | 0.5632 |
| ENSP00000347329 | SEC31A          | 0.5632 |
| ENSP00000252785 | SCO2            | 0.5632 |
| ENSP00000369757 | RPS6            | 0.5632 |
| ENSP00000429374 | RPS20           | 0.5632 |
| ENSP00000389103 | RPL23A          | 0.5632 |
| ENSP00000420321 | ROBO1           | 0.5632 |
| ENSP00000310406 | RIN1            | 0.5632 |

|                 |         |        |
|-----------------|---------|--------|
| ENSP00000323050 | RBBP8   | 0.5632 |
| ENSP00000419471 | RAD51B  | 0.5632 |
| ENSP00000328858 | PYCR1   | 0.5632 |
| ENSP00000365687 | PTF1A   | 0.5632 |
| ENSP00000346255 | PPTC7   | 0.5632 |
| ENSP00000336591 | PPP2R2B | 0.5632 |
| ENSP00000375557 | POU5F1B | 0.5632 |
| ENSP00000355001 | POU3F3  | 0.5632 |
| ENSP00000377061 | PLXNA1  | 0.5632 |
| ENSP00000262304 | PKD1    | 0.5632 |
| ENSP00000261313 | PEBP1   | 0.5632 |
| ENSP00000313007 | PABPC1  | 0.5632 |
| ENSP00000196371 | OXCT1   | 0.5632 |
| ENSP00000282549 | OTX1    | 0.5632 |
| ENSP00000262551 | OGN     | 0.5632 |
| ENSP00000344314 | OFD1    | 0.5632 |
| ENSP00000254508 | NUP210  | 0.5632 |
| ENSP00000349275 | NRG1    | 0.5632 |
| ENSP00000357982 | NR2E1   | 0.5632 |
| ENSP00000300589 | NOD2    | 0.5632 |
| ENSP00000222823 | NOD1    | 0.5632 |
| ENSP00000287713 | NMNAT2  | 0.5632 |
| ENSP00000268668 | NDUFB10 | 0.5632 |
| ENSP00000256854 | NARS    | 0.5632 |
| ENSP00000333657 | MX2     | 0.5632 |
| ENSP00000236826 | MMP8    | 0.5632 |
| ENSP00000262041 | MEOX2   | 0.5632 |
| ENSP00000261267 | LYZ     | 0.5632 |
| ENSP00000294304 | LRP5    | 0.5632 |
| ENSP00000347684 | LMX1B   | 0.5632 |
| ENSP00000348384 | LAMB3   | 0.5632 |
| ENSP00000290158 | KPNB1   | 0.5632 |
| ENSP00000264690 | KLKB1   | 0.5632 |
| ENSP00000439065 | KLC1    | 0.5632 |
| ENSP00000408979 | KIF5A   | 0.5632 |
| ENSP00000264712 | KIF3C   | 0.5632 |
| ENSP00000367203 | KDM6A   | 0.5632 |
| ENSP00000264741 | ITGA9   | 0.5632 |
| ENSP00000307006 | IRX2    | 0.5632 |
| ENSP00000263341 | IL1B    | 0.5632 |
| ENSP00000360252 | HOOK1   | 0.5632 |
| ENSP00000363745 | HNRNPR  | 0.5632 |
| ENSP00000284154 | GRAP    | 0.5632 |
| ENSP00000337972 | GDPD5   | 0.5632 |
| ENSP00000373918 | GARS    | 0.5632 |
| ENSP00000306866 | GABARAP | 0.5632 |
| ENSP00000373572 | FOXI2   | 0.5632 |
| ENSP00000327145 | FLNC    | 0.5632 |
| ENSP00000274625 | FGF18   | 0.5632 |
| ENSP00000324105 | ENO3    | 0.5632 |
| ENSP00000348965 | DYNC1H1 | 0.5632 |
| ENSP00000316054 | DVL3    | 0.5632 |
| ENSP00000363081 | DKK1    | 0.5632 |



|                 |             |        |
|-----------------|-------------|--------|
| ENSP00000321348 | DIAPH2      | 0.5632 |
| ENSP00000219240 | DHODH       | 0.5632 |
| ENSP00000220764 | DECR1       | 0.5632 |
| ENSP00000358716 | DDX20       | 0.5632 |
| ENSP00000364188 | DDOST       | 0.5632 |
| ENSP00000312435 | DAG1        | 0.5632 |
| ENSP00000362849 | CTNNA3      | 0.5632 |
| ENSP00000446743 | CNPY2       | 0.5632 |
| ENSP00000432768 | CKAP5       | 0.5632 |
| ENSP00000455307 | CHD9        | 0.5632 |
| ENSP00000362330 | CHD6        | 0.5632 |
| ENSP00000349508 | CHD4        | 0.5632 |
| ENSP00000318486 | CDK5R1      | 0.5632 |
| ENSP00000027335 | CDH17       | 0.5632 |
| ENSP00000420514 | BAG1        | 0.5632 |
| ENSP00000295685 | ARPC2       | 0.5632 |
| ENSP00000335044 | ARID2       | 0.5632 |
| ENSP00000272102 | ARF1        | 0.5632 |
| ENSP00000261722 | AP3B2       | 0.5632 |
| ENSP00000394107 | AP000304.12 | 0.5632 |
| ENSP00000396527 | AC068533.7  | 0.5632 |
| ENSP00000323929 | A2M         | 0.5632 |
| ENSP00000358202 | EMX2        | 0.5632 |
| ENSP00000322915 | ZMYM4       | 0.5605 |
| ENSP00000254037 | ZCCHC9      | 0.5605 |
| ENSP00000348129 | WDR88       | 0.5605 |
| ENSP00000216639 | VRK1        | 0.5605 |
| ENSP00000356515 | UTRN        | 0.5605 |
| ENSP00000249042 | TST         | 0.5605 |
| ENSP00000314733 | TOLLIP      | 0.5605 |
| ENSP00000278317 | TNNT3       | 0.5605 |
| ENSP00000237289 | TNFAIP3     | 0.5605 |
| ENSP00000316029 | TLN1        | 0.5605 |
| ENSP00000237264 | TBPL1       | 0.5605 |
| ENSP00000340271 | TAF3        | 0.5605 |
| ENSP00000404029 | SUPT5H      | 0.5605 |
| ENSP00000263904 | STAM2       | 0.5605 |
| ENSP00000351480 | SPECC1L     | 0.5605 |
| ENSP00000373964 | SMTNL2      | 0.5605 |
| ENSP00000329466 | SIRT7       | 0.5605 |
| ENSP00000349156 | SIAH1       | 0.5605 |
| ENSP00000415786 | SERPINE2    | 0.5605 |
| ENSP00000239944 | SERP1       | 0.5605 |
| ENSP00000361818 | SDC4        | 0.5605 |
| ENSP00000307046 | SDC2        | 0.5605 |
| ENSP00000217086 | SALL4       | 0.5605 |
| ENSP00000270225 | SAE1        | 0.5605 |
| ENSP00000318297 | RUVBL1      | 0.5605 |
| ENSP00000348944 | RSPO1       | 0.5605 |
| ENSP00000261991 | RPS6KA5     | 0.5605 |
| ENSP00000333896 | RPS6KA4     | 0.5605 |
| ENSP00000363021 | RPA2        | 0.5605 |
| ENSP00000254719 | RPA1        | 0.5605 |

|                 |         |        |
|-----------------|---------|--------|
| ENSP00000327025 | RORC    | 0.5605 |
| ENSP00000265080 | RASGRF2 | 0.5605 |
| ENSP00000222008 | RABAC1  | 0.5605 |
| ENSP00000307567 | QARS    | 0.5605 |
| ENSP00000264639 | PSMD3   | 0.5605 |
| ENSP00000414359 | PSMA1   | 0.5605 |
| ENSP00000293860 | POLR3K  | 0.5605 |
| ENSP00000263088 | PLD2    | 0.5605 |
| ENSP00000342793 | PLD1    | 0.5605 |
| ENSP00000260402 | PLCB2   | 0.5605 |
| ENSP00000320171 | PKM     | 0.5605 |
| ENSP00000358417 | PHGDH   | 0.5605 |
| ENSP00000219406 | PDIA2   | 0.5605 |
| ENSP00000401721 | PAN2    | 0.5605 |
| ENSP00000347710 | OPHN1   | 0.5605 |
| ENSP00000371785 | OLIG1   | 0.5605 |
| ENSP00000397297 | NTF3    | 0.5605 |
| ENSP00000381293 | NSF     | 0.5605 |
| ENSP00000278886 | NINL    | 0.5605 |
| ENSP00000317333 | NEUROG2 | 0.5605 |
| ENSP00000470609 | NDUFA7  | 0.5605 |
| ENSP00000364289 | NCBP1   | 0.5605 |
| ENSP00000325017 | NCAPD2  | 0.5605 |
| ENSP00000363571 | MUSK    | 0.5605 |
| ENSP00000368790 | MTRF1   | 0.5605 |
| ENSP00000382250 | MRPS6   | 0.5605 |
| ENSP00000361206 | MRPS18A | 0.5605 |
| ENSP00000359818 | MMS19   | 0.5605 |
| ENSP00000211287 | MAPK13  | 0.5605 |
| ENSP00000314363 | MAP4K4  | 0.5605 |
| ENSP00000368020 | KIF3A   | 0.5605 |
| ENSP00000366271 | KDM2B   | 0.5605 |
| ENSP00000337746 | ISYNA1  | 0.5605 |
| ENSP00000345096 | IMPDH1  | 0.5605 |
| ENSP00000278200 | IMMP1L  | 0.5605 |
| ENSP00000340019 | HSPD1   | 0.5605 |
| ENSP00000343040 | HMGB1   | 0.5605 |
| ENSP00000080059 | HDAC7   | 0.5605 |
| ENSP00000230990 | HBEGF   | 0.5605 |
| ENSP00000313432 | GRHPR   | 0.5605 |
| ENSP00000245541 | GGA3    | 0.5605 |
| ENSP00000365145 | FOXS1   | 0.5605 |
| ENSP00000296641 | F2RL2   | 0.5605 |
| ENSP00000346173 | ETFB    | 0.5605 |
| ENSP00000363763 | EPHB2   | 0.5605 |
| ENSP00000381097 | EPHB1   | 0.5605 |
| ENSP00000360250 | ENTPD1  | 0.5605 |
| ENSP00000265753 | EIF4H   | 0.5605 |
| ENSP00000370936 | E2F6    | 0.5605 |
| ENSP00000342105 | DYRK2   | 0.5605 |
| ENSP00000216024 | DMC1    | 0.5605 |
| ENSP00000366997 | DIS3    | 0.5605 |
| ENSP00000353401 | CUX1    | 0.5605 |

|                 |          |        |
|-----------------|----------|--------|
| ENSP00000216336 | CTSG     | 0.5605 |
| ENSP00000227266 | CTSC     | 0.5605 |
| ENSP00000262506 | CSNK2A2  | 0.5605 |
| ENSP00000345412 | CPSF7    | 0.5605 |
| ENSP00000457881 | CPEB1    | 0.5605 |
| ENSP00000261951 | CNOT6    | 0.5605 |
| ENSP00000340954 | CNBD2    | 0.5605 |
| ENSP00000256722 | CMPK2    | 0.5605 |
| ENSP00000358262 | CHD1L    | 0.5605 |
| ENSP00000273853 | CENPC1   | 0.5605 |
| ENSP00000261769 | CDH1     | 0.5605 |
| ENSP00000209728 | CDC6     | 0.5605 |
| ENSP00000312027 | CD7      | 0.5605 |
| ENSP00000250092 | CD68     | 0.5605 |
| ENSP00000299300 | CCT2     | 0.5605 |
| ENSP00000291295 | CALM3    | 0.5605 |
| ENSP00000369965 | BTF3     | 0.5605 |
| ENSP00000448323 | BRF1     | 0.5605 |
| ENSP00000216267 | BRD1     | 0.5605 |
| ENSP00000417132 | BAP1     | 0.5605 |
| ENSP00000338967 | ARHGAP6  | 0.5605 |
| ENSP00000306010 | ARF4     | 0.5605 |
| ENSP00000256658 | AP4B1    | 0.5605 |
| ENSP00000377148 | AP1G1    | 0.5605 |
| ENSP00000315931 | AHCYL2   | 0.5605 |
| ENSP00000367934 | UQCRCQ   | 0.5579 |
| ENSP00000284440 | UCHL1    | 0.5579 |
| ENSP00000263798 | TYRO3    | 0.5579 |
| ENSP00000259818 | TUBB2B   | 0.5579 |
| ENSP00000339001 | TUBB     | 0.5579 |
| ENSP00000372437 | TPTE2    | 0.5579 |
| ENSP00000367013 | TNFRSF25 | 0.5579 |
| ENSP00000291527 | TFF1     | 0.5579 |
| ENSP00000257915 | TFCP2    | 0.5579 |
| ENSP00000361057 | SURF4    | 0.5579 |
| ENSP00000390500 | STK3     | 0.5579 |
| ENSP00000362931 | SRPK1    | 0.5579 |
| ENSP00000453785 | SNX1     | 0.5579 |
| ENSP00000369154 | SMAD9    | 0.5579 |
| ENSP00000220772 | SFRP1    | 0.5579 |
| ENSP00000221494 | SF3A2    | 0.5579 |
| ENSP00000346067 | RPSA     | 0.5579 |
| ENSP00000467676 | RPS15    | 0.5579 |
| ENSP00000352401 | RPE      | 0.5579 |
| ENSP00000353030 | PTPRF    | 0.5579 |
| ENSP00000271308 | PSMA5    | 0.5579 |
| ENSP00000295797 | PRKCI    | 0.5579 |
| ENSP00000327255 | PPM1A    | 0.5579 |
| ENSP00000431603 | POU2F2   | 0.5579 |
| ENSP00000228347 | POLR3B   | 0.5579 |
| ENSP00000370377 | PITRM1   | 0.5579 |
| ENSP00000216727 | PABPN1   | 0.5579 |
| ENSP00000285848 | OXA1L    | 0.5579 |

|                 |           |        |
|-----------------|-----------|--------|
| ENSP00000361882 | ODF2      | 0.5579 |
| ENSP00000347169 | NUMB      | 0.5579 |
| ENSP00000310006 | NR1D2     | 0.5579 |
| ENSP00000366410 | NMNAT1    | 0.5579 |
| ENSP00000456832 | NDUFB8    | 0.5579 |
| ENSP00000237889 | NDUFB3    | 0.5579 |
| ENSP00000335636 | NAA20     | 0.5579 |
| ENSP00000365152 | MYLK2     | 0.5579 |
| ENSP00000383023 | MYL5      | 0.5579 |
| ENSP00000321445 | MSC       | 0.5579 |
| ENSP00000361405 | MMP9      | 0.5579 |
| ENSP00000279068 | LSM14B    | 0.5579 |
| ENSP00000261349 | LRP6      | 0.5579 |
| ENSP00000254457 | LHX1      | 0.5579 |
| ENSP00000445175 | LDHA      | 0.5579 |
| ENSP00000293308 | KRT8      | 0.5579 |
| ENSP00000355124 | KRT19     | 0.5579 |
| ENSP00000364864 | KIF3B     | 0.5579 |
| ENSP00000306565 | ISG20     | 0.5579 |
| ENSP00000377218 | IRF2      | 0.5579 |
| ENSP00000255078 | IGHMBP2   | 0.5579 |
| ENSP00000302665 | IGF1      | 0.5579 |
| ENSP00000332773 | IGDCC3    | 0.5579 |
| ENSP00000369554 | IFNA2     | 0.5579 |
| ENSP00000264832 | ICAM1     | 0.5579 |
| ENSP00000364794 | IARS      | 0.5579 |
| ENSP00000450527 | HOPX      | 0.5579 |
| ENSP00000316772 | HMHA1     | 0.5579 |
| ENSP00000351524 | HELZ      | 0.5579 |
| ENSP00000298068 | HECTD2    | 0.5579 |
| ENSP00000325136 | HADHB     | 0.5579 |
| ENSP00000370023 | HADHA     | 0.5579 |
| ENSP00000296417 | H2AFZ     | 0.5579 |
| ENSP00000319118 | GSX2      | 0.5579 |
| ENSP00000349305 | GOLGA4    | 0.5579 |
| ENSP00000378338 | GIT1      | 0.5579 |
| ENSP00000340698 | GIPC1     | 0.5579 |
| ENSP00000394008 | GABARAPL3 | 0.5579 |
| ENSP00000305480 | FEN1      | 0.5579 |
| ENSP00000320543 | EPN2      | 0.5579 |
| ENSP00000263277 | EHD2      | 0.5579 |
| ENSP00000245323 | EFNB2     | 0.5579 |
| ENSP00000288699 | DPYSL5    | 0.5579 |
| ENSP00000353104 | DHDDS     | 0.5579 |
| ENSP00000379475 | DDX39B    | 0.5579 |
| ENSP00000354791 | DCTN1     | 0.5579 |
| ENSP00000264414 | CUL3      | 0.5579 |
| ENSP00000390011 | CTU1      | 0.5579 |
| ENSP00000362063 | CSTF2     | 0.5579 |
| ENSP00000402608 | CPS1      | 0.5579 |
| ENSP00000242285 | CLTA      | 0.5579 |
| ENSP00000357907 | CDK19     | 0.5579 |
| ENSP00000219789 | CDIPT     | 0.5579 |

|                 |         |        |
|-----------------|---------|--------|
| ENSP00000331172 | CD8B    | 0.5579 |
| ENSP00000228434 | CD69    | 0.5579 |
| ENSP00000262262 | CD33    | 0.5579 |
| ENSP00000370989 | CD274   | 0.5579 |
| ENSP00000361878 | CAP1    | 0.5579 |
| ENSP00000315299 | CALML3  | 0.5579 |
| ENSP00000225698 | C1QBP   | 0.5579 |
| ENSP00000358081 | BAG3    | 0.5579 |
| ENSP00000292401 | AZGP1   | 0.5579 |
| ENSP00000242839 | ATP7B   | 0.5579 |
| ENSP00000431605 | ATP6V0B | 0.5579 |
| ENSP00000344546 | ARID1B  | 0.5579 |
| ENSP00000357066 | ARG1    | 0.5579 |
| ENSP00000256682 | ARF3    | 0.5579 |
| ENSP00000302895 | ARAP2   | 0.5579 |
| ENSP00000358921 | ACTR1A  | 0.5579 |
| ENSP00000407761 | ACOXL   | 0.5579 |
| ENSP00000387356 | ACAN    | 0.5579 |
| ENSP00000302501 | ZEB2    | 0.5553 |
| ENSP00000299138 | VPS35   | 0.5553 |
| ENSP00000342812 | USP9Y   | 0.5553 |
| ENSP00000356425 | UCHL5   | 0.5553 |
| ENSP00000264552 | UBE2S   | 0.5553 |
| ENSP00000283645 | TUBGCP5 | 0.5553 |
| ENSP00000264071 | TUBB4A  | 0.5553 |
| ENSP00000298552 | TSC1    | 0.5553 |
| ENSP00000341268 | TRADD   | 0.5553 |
| ENSP00000332326 | TNFAIP2 | 0.5553 |
| ENSP00000280605 | TKTL2   | 0.5553 |
| ENSP00000282111 | TCF7L1  | 0.5553 |
| ENSP00000331791 | TBX1    | 0.5553 |
| ENSP00000287652 | TATDN2  | 0.5553 |
| ENSP00000278968 | TAGLN   | 0.5553 |
| ENSP00000265073 | SUB1    | 0.5553 |
| ENSP00000317714 | STX4    | 0.5553 |
| ENSP00000229812 | STK38   | 0.5553 |
| ENSP00000341815 | SOX18   | 0.5553 |
| ENSP00000357674 | SNAPIN  | 0.5553 |
| ENSP00000244050 | SNAI1   | 0.5553 |
| ENSP00000340989 | SFN     | 0.5553 |
| ENSP00000337053 | SEL1L   | 0.5553 |
| ENSP00000359370 | SEC31B  | 0.5553 |
| ENSP00000468633 | SEC11C  | 0.5553 |
| ENSP00000260926 | SATB2   | 0.5553 |
| ENSP00000341885 | RPS2    | 0.5553 |
| ENSP00000393241 | RPS18   | 0.5553 |
| ENSP00000332454 | RIPK4   | 0.5553 |
| ENSP00000408295 | RFC5    | 0.5553 |
| ENSP00000370151 | RAD17   | 0.5553 |
| ENSP00000365837 | PUS1    | 0.5553 |
| ENSP00000349932 | PTPRS   | 0.5553 |
| ENSP00000406162 | PRMT1   | 0.5553 |
| ENSP00000298510 | PRDX3   | 0.5553 |

|                 |          |        |
|-----------------|----------|--------|
| ENSP00000263857 | POLR1A   | 0.5553 |
| ENSP00000322570 | POLE     | 0.5553 |
| ENSP00000354532 | PNP      | 0.5553 |
| ENSP00000334105 | PLCB4    | 0.5553 |
| ENSP00000339933 | PKLR     | 0.5553 |
| ENSP00000356155 | PIK3C2B  | 0.5553 |
| ENSP00000348099 | PDLIM7   | 0.5553 |
| ENSP00000255266 | PDE6A    | 0.5553 |
| ENSP00000380378 | PAFAH1B1 | 0.5553 |
| ENSP00000333275 | NR2C1    | 0.5553 |
| ENSP00000215565 | NDUFB7   | 0.5553 |
| ENSP00000289473 | NCF1     | 0.5553 |
| ENSP00000309597 | MAP3K11  | 0.5553 |
| ENSP00000222725 | LFNG     | 0.5553 |
| ENSP00000306772 | LDB2     | 0.5553 |
| ENSP00000386918 | KDELR3   | 0.5553 |
| ENSP00000225916 | KAT2A    | 0.5553 |
| ENSP00000369456 | ITPA     | 0.5553 |
| ENSP00000274364 | IQGAP2   | 0.5553 |
| ENSP00000227752 | IL10RA   | 0.5553 |
| ENSP00000369581 | IFNB1    | 0.5553 |
| ENSP00000334061 | HDAC6    | 0.5553 |
| ENSP00000216271 | HDAC10   | 0.5553 |
| ENSP00000308405 | H2AFV    | 0.5553 |
| ENSP00000377836 | GPC3     | 0.5553 |
| ENSP00000327589 | GLUD2    | 0.5553 |
| ENSP00000296875 | GDF9     | 0.5553 |
| ENSP00000215631 | GADD45B  | 0.5553 |
| ENSP00000434034 | FZD4     | 0.5553 |
| ENSP00000226247 | FOXP1    | 0.5553 |
| ENSP00000362107 | FHL3     | 0.5553 |
| ENSP00000306361 | FGA      | 0.5553 |
| ENSP00000221801 | FBL      | 0.5553 |
| ENSP00000359356 | EVI5     | 0.5553 |
| ENSP00000362299 | ENG      | 0.5553 |
| ENSP00000263360 | EED      | 0.5553 |
| ENSP00000303515 | DUS1L    | 0.5553 |
| ENSP00000372005 | DNAJC19  | 0.5553 |
| ENSP00000222598 | DLX5     | 0.5553 |
| ENSP00000340292 | DLK1     | 0.5553 |
| ENSP00000381565 | DIAPH1   | 0.5553 |
| ENSP00000382840 | DDX3X    | 0.5553 |
| ENSP00000355086 | DARS2    | 0.5553 |
| ENSP00000264613 | CP       | 0.5553 |
| ENSP00000355500 | CEP170   | 0.5553 |
| ENSP00000357025 | CD48     | 0.5553 |
| ENSP00000367605 | CCL3L3   | 0.5553 |
| ENSP00000408984 | CCL3L1   | 0.5553 |
| ENSP00000341940 | CAV3     | 0.5553 |
| ENSP00000309595 | C10orf2  | 0.5553 |
| ENSP00000268057 | BBS4     | 0.5553 |
| ENSP00000260947 | BARD1    | 0.5553 |
| ENSP00000345728 | ATP7A    | 0.5553 |

|                 |           |        |
|-----------------|-----------|--------|
| ENSP00000377878 | ATP5G2    | 0.5553 |
| ENSP00000322159 | ATG4C     | 0.5553 |
| ENSP00000375057 | ARL4C     | 0.5553 |
| ENSP00000380635 | ARL16     | 0.5553 |
| ENSP00000355090 | ARHGAP11A | 0.5553 |
| ENSP00000360985 | ARFGEF2   | 0.5553 |
| ENSP00000379891 | AP1S3     | 0.5553 |
| ENSP00000265709 | ANK1      | 0.5553 |
| ENSP00000221496 | AMH       | 0.5553 |
| ENSP00000357459 | ADAR      | 0.5553 |
| ENSP00000260408 | ADAM10    | 0.5553 |
| ENSP00000265724 | ABCB1     | 0.5553 |
| ENSP00000261772 | AARS      | 0.5553 |
| ENSP00000360277 | DAB1      | 0.5553 |
| ENSP00000384179 | ZFPM2     | 0.5526 |
| ENSP00000262630 | ZBTB32    | 0.5526 |
| ENSP00000452549 | YJEFN3    | 0.5526 |
| ENSP00000367756 | UNC13B    | 0.5526 |
| ENSP00000456648 | TUBGCP4   | 0.5526 |
| ENSP00000301071 | TUBA1A    | 0.5526 |
| ENSP00000253024 | TRIM28    | 0.5526 |
| ENSP00000396704 | TOP2B     | 0.5526 |
| ENSP00000355566 | TOMM20    | 0.5526 |
| ENSP00000353874 | TLR9      | 0.5526 |
| ENSP00000260010 | TLR2      | 0.5526 |
| ENSP00000385461 | TFDP3     | 0.5526 |
| ENSP00000296145 | TDGF1     | 0.5526 |
| ENSP00000338093 | TARSL2    | 0.5526 |
| ENSP00000356033 | TAGAP     | 0.5526 |
| ENSP00000201586 | SULT2B1   | 0.5526 |
| ENSP00000267814 | SORD      | 0.5526 |
| ENSP00000429276 | SNTG1     | 0.5526 |
| ENSP00000370808 | SLC25A6   | 0.5526 |
| ENSP00000251020 | SALL1     | 0.5526 |
| ENSP00000346050 | RPS3A     | 0.5526 |
| ENSP00000367439 | RPP38     | 0.5526 |
| ENSP00000351132 | RHOT1     | 0.5526 |
| ENSP00000450244 | RASAL1    | 0.5526 |
| ENSP00000373864 | RAPGEF3   | 0.5526 |
| ENSP00000319169 | PRMT5     | 0.5526 |
| ENSP00000263431 | PRKCG     | 0.5526 |
| ENSP00000408695 | PRKCA     | 0.5526 |
| ENSP00000260643 | PREB      | 0.5526 |
| ENSP00000262746 | PRDX1     | 0.5526 |
| ENSP00000381726 | PRAME     | 0.5526 |
| ENSP00000328412 | PDE6G     | 0.5526 |
| ENSP00000354033 | PCGF2     | 0.5526 |
| ENSP00000362621 | PABPC1L2B | 0.5526 |
| ENSP00000274276 | OSMR      | 0.5526 |
| ENSP00000373674 | NT5M      | 0.5526 |
| ENSP00000337459 | NOS1      | 0.5526 |
| ENSP00000328181 | NOG       | 0.5526 |
| ENSP00000413572 | NLE1      | 0.5526 |

|                 |         |        |
|-----------------|---------|--------|
| ENSP00000387219 | NFU1    | 0.5526 |
| ENSP00000325663 | NFKBIZ  | 0.5526 |
| ENSP00000351015 | NF1     | 0.5526 |
| ENSP00000341021 | NANOS2  | 0.5526 |
| ENSP00000228641 | MYF6    | 0.5526 |
| ENSP00000356202 | MTRF1L  | 0.5526 |
| ENSP00000264995 | MRPL3   | 0.5526 |
| ENSP00000370410 | MPDZ    | 0.5526 |
| ENSP00000350028 | MOV10   | 0.5526 |
| ENSP00000438144 | MDH1    | 0.5526 |
| ENSP00000299766 | MC4R    | 0.5526 |
| ENSP00000340820 | MAPT    | 0.5526 |
| ENSP00000215659 | MAPK12  | 0.5526 |
| ENSP00000380066 | MAP4K1  | 0.5526 |
| ENSP00000231004 | LOX     | 0.5526 |
| ENSP00000330393 | LEPR    | 0.5526 |
| ENSP00000363435 | ITPR3   | 0.5526 |
| ENSP00000354451 | IQGAP3  | 0.5526 |
| ENSP00000250971 | INS     | 0.5526 |
| ENSP00000170630 | IL4R    | 0.5526 |
| ENSP00000296545 | IL15    | 0.5526 |
| ENSP00000231228 | IL12B   | 0.5526 |
| ENSP00000303279 | IARS2   | 0.5526 |
| ENSP00000296464 | HSPA4L  | 0.5526 |
| ENSP00000249440 | HOXD3   | 0.5526 |
| ENSP00000268097 | HEXA    | 0.5526 |
| ENSP00000367065 | HES2    | 0.5526 |
| ENSP00000359859 | GTPBP5  | 0.5526 |
| ENSP00000222511 | GTPBP10 | 0.5526 |
| ENSP00000344173 | GRM8    | 0.5526 |
| ENSP00000251808 | GRHL2   | 0.5526 |
| ENSP00000329380 | GP1BA   | 0.5526 |
| ENSP00000265070 | GOLPH3  | 0.5526 |
| ENSP00000305260 | GNB2    | 0.5526 |
| ENSP00000334051 | GNAL    | 0.5526 |
| ENSP00000275364 | GNA12   | 0.5526 |
| ENSP00000276533 | GINS4   | 0.5526 |
| ENSP00000345785 | FZD9    | 0.5526 |
| ENSP00000250113 | FXR2    | 0.5526 |
| ENSP00000001008 | FKBP4   | 0.5526 |
| ENSP00000222157 | FGF21   | 0.5526 |
| ENSP00000281092 | FER     | 0.5526 |
| ENSP00000357097 | FCER1A  | 0.5526 |
| ENSP00000274680 | FARS2   | 0.5526 |
| ENSP00000337445 | ELAC2   | 0.5526 |
| ENSP00000368169 | DVL1    | 0.5526 |
| ENSP00000263035 | DHTKD1  | 0.5526 |
| ENSP00000265036 | DEPDC1B | 0.5526 |
| ENSP00000373715 | DCP2    | 0.5526 |
| ENSP00000350785 | DAPK1   | 0.5526 |
| ENSP00000354398 | CYTH1   | 0.5526 |
| ENSP00000259470 | CTSL2   | 0.5526 |
| ENSP00000279804 | CTF1    | 0.5526 |



|                 |          |        |
|-----------------|----------|--------|
| ENSP00000369126 | CSNK1A1L | 0.5526 |
| ENSP00000246554 | COX6B1   | 0.5526 |
| ENSP00000379823 | COL4A3   | 0.5526 |
| ENSP00000347665 | COL18A1  | 0.5526 |
| ENSP00000003084 | CFTR     | 0.5526 |
| ENSP00000389951 | CELF2    | 0.5526 |
| ENSP00000303706 | CDC25A   | 0.5526 |
| ENSP00000011653 | CD4      | 0.5526 |
| ENSP00000324890 | CD28     | 0.5526 |
| ENSP00000292303 | CCR5     | 0.5526 |
| ENSP00000380256 | CCNF     | 0.5526 |
| ENSP00000225831 | CCL2     | 0.5526 |
| ENSP00000368124 | CAMK1D   | 0.5526 |
| ENSP00000432472 | BRK1     | 0.5526 |
| ENSP00000293805 | BCL6B    | 0.5526 |
| ENSP00000301887 | BATF2    | 0.5526 |
| ENSP00000349142 | ATP5C1   | 0.5526 |
| ENSP00000356379 | ASPM     | 0.5526 |
| ENSP00000261636 | ARL1     | 0.5526 |
| ENSP00000313506 | ARHGAP28 | 0.5526 |
| ENSP00000357218 | APOA1BP  | 0.5526 |
| ENSP00000345848 | ANP32B   | 0.5526 |
| ENSP00000417864 | ANP32A   | 0.5526 |
| ENSP00000264276 | ALS2     | 0.5526 |
| ENSP00000360268 | ALDH18A1 | 0.5526 |
| ENSP00000346921 | AK2      | 0.5526 |
| ENSP00000355627 | AGT      | 0.5526 |
| ENSP00000355493 | ADSS     | 0.5526 |
| ENSP00000347498 | ZFYVE19  | 0.5500 |
| ENSP00000345633 | ZCCHC13  | 0.5500 |
| ENSP00000389381 | YY2      | 0.5500 |
| ENSP00000347858 | XIAP     | 0.5500 |
| ENSP00000265107 | WDR70    | 0.5500 |
| ENSP00000325377 | WDR33    | 0.5500 |
| ENSP00000341289 | TUBB4B   | 0.5500 |
| ENSP00000369703 | TUBB2A   | 0.5500 |
| ENSP00000438349 | TRMT112  | 0.5500 |
| ENSP00000231524 | TRIM23   | 0.5500 |
| ENSP00000401371 | TIA1     | 0.5500 |
| ENSP00000370571 | TH       | 0.5500 |
| ENSP00000296096 | TCF23    | 0.5500 |
| ENSP00000284811 | TCEB1    | 0.5500 |
| ENSP00000419325 | SUCLG2   | 0.5500 |
| ENSP00000377446 | SUCLG1   | 0.5500 |
| ENSP00000305958 | STIP1    | 0.5500 |
| ENSP00000363727 | STARD8   | 0.5500 |
| ENSP00000338785 | STARD13  | 0.5500 |
| ENSP00000418401 | SRPRB    | 0.5500 |
| ENSP00000305133 | SOCS5    | 0.5500 |
| ENSP00000262188 | SMARCD3  | 0.5500 |
| ENSP00000297151 | SLU7     | 0.5500 |
| ENSP00000369131 | SIN3B    | 0.5500 |
| ENSP00000356671 | SERPINC1 | 0.5500 |

|                 |              |        |
|-----------------|--------------|--------|
| ENSP00000236147 | SELL         | 0.5500 |
| ENSP00000223641 | SEC61B       | 0.5500 |
| ENSP00000364699 | SDHD         | 0.5500 |
| ENSP00000251453 | RPS16        | 0.5500 |
| ENSP00000453089 | RP11-468E2.6 | 0.5500 |
| ENSP00000364860 | ROR2         | 0.5500 |
| ENSP00000306080 | RNMTL1       | 0.5500 |
| ENSP00000262940 | RASA4        | 0.5500 |
| ENSP00000414624 | PRPSAP1      | 0.5500 |
| ENSP00000227524 | PRPF19       | 0.5500 |
| ENSP00000372067 | PRMT8        | 0.5500 |
| ENSP00000377793 | PRC1         | 0.5500 |
| ENSP00000418603 | POLR2J2      | 0.5500 |
| ENSP00000462664 | POLI         | 0.5500 |
| ENSP00000350132 | PLN          | 0.5500 |
| ENSP00000458238 | PI4KA        | 0.5500 |
| ENSP00000225655 | PFN1         | 0.5500 |
| ENSP00000340278 | PARK7        | 0.5500 |
| ENSP00000341390 | NR3C2        | 0.5500 |
| ENSP00000320447 | NR2C2        | 0.5500 |
| ENSP00000276062 | NDUFB11      | 0.5500 |
| ENSP00000360576 | NDOR1        | 0.5500 |
| ENSP00000333982 | NDEL1        | 0.5500 |
| ENSP00000314620 | MS4A1        | 0.5500 |
| ENSP00000053468 | MRPS10       | 0.5500 |
| ENSP00000322788 | MMP1         | 0.5500 |
| ENSP00000348020 | MLH3         | 0.5500 |
| ENSP00000261537 | MIB1         | 0.5500 |
| ENSP00000372025 | MBP          | 0.5500 |
| ENSP00000364721 | MAPRE1       | 0.5500 |
| ENSP00000419370 | MALSU1       | 0.5500 |
| ENSP00000243077 | LRP1         | 0.5500 |
| ENSP00000261366 | LMNB1        | 0.5500 |
| ENSP00000263274 | LIG1         | 0.5500 |
| ENSP00000314837 | KLC2         | 0.5500 |
| ENSP00000381216 | KHSRP        | 0.5500 |
| ENSP00000245121 | KATNAL2      | 0.5500 |
| ENSP00000306253 | ITPR1        | 0.5500 |
| ENSP00000310127 | IRF3         | 0.5500 |
| ENSP00000355011 | ILF2         | 0.5500 |
| ENSP00000247207 | HSPA2        | 0.5500 |
| ENSP00000318631 | HSD17B6      | 0.5500 |
| ENSP00000328598 | HOXD1        | 0.5500 |
| ENSP00000261416 | HEXB         | 0.5500 |
| ENSP00000239027 | HELLS        | 0.5500 |
| ENSP00000376609 | GRK5         | 0.5500 |
| ENSP00000354677 | GPX7         | 0.5500 |
| ENSP00000259727 | GMPR         | 0.5500 |
| ENSP00000331745 | GDF3         | 0.5500 |
| ENSP00000462795 | FOXD1        | 0.5500 |
| ENSP00000331544 | FBLN1        | 0.5500 |
| ENSP00000261942 | FAF2         | 0.5500 |
| ENSP00000386171 | ESRRG        | 0.5500 |

|                 |          |        |
|-----------------|----------|--------|
| ENSP00000295743 | EOMES    | 0.5500 |
| ENSP00000256383 | EIF2S1   | 0.5500 |
| ENSP00000351769 | DUS2L    | 0.5500 |
| ENSP00000359211 | DPYD     | 0.5500 |
| ENSP00000360644 | DPM1     | 0.5500 |
| ENSP00000354478 | DLX1     | 0.5500 |
| ENSP00000345731 | DLG1     | 0.5500 |
| ENSP00000355593 | DISC1    | 0.5500 |
| ENSP00000315569 | DIS3L2   | 0.5500 |
| ENSP00000233078 | DAZAP1   | 0.5500 |
| ENSP00000317159 | CYC1     | 0.5500 |
| ENSP00000367851 | CYBB     | 0.5500 |
| ENSP00000295890 | COX18    | 0.5500 |
| ENSP00000264903 | CNOT6L   | 0.5500 |
| ENSP00000309415 | CLTB     | 0.5500 |
| ENSP00000263710 | CLASP1   | 0.5500 |
| ENSP00000388648 | CHEK1    | 0.5500 |
| ENSP00000308165 | CD36     | 0.5500 |
| ENSP00000261900 | CCNT1    | 0.5500 |
| ENSP00000288207 | CCNB2    | 0.5500 |
| ENSP00000420194 | CASR     | 0.5500 |
| ENSP00000304643 | CALML6   | 0.5500 |
| ENSP00000265990 | BTAF1    | 0.5500 |
| ENSP00000379204 | BMP7     | 0.5500 |
| ENSP00000440045 | ATP2A2   | 0.5500 |
| ENSP00000352918 | ARPC5    | 0.5500 |
| ENSP00000351333 | ARHGAP19 | 0.5500 |
| ENSP00000352603 | AP4M1    | 0.5500 |
| ENSP00000285093 | ACAA2    | 0.5500 |
| ENSP00000275189 | ARHGAP18 | 0.5500 |
| ENSP00000339484 | ZFAND4   | 0.5474 |
| ENSP00000298139 | WRN      | 0.5474 |
| ENSP00000351446 | WDR5     | 0.5474 |
| ENSP00000298125 | WDFY2    | 0.5474 |
| ENSP00000254950 | VPS4A    | 0.5474 |
| ENSP00000414922 | USP41    | 0.5474 |
| ENSP00000294383 | USP24    | 0.5474 |
| ENSP00000246337 | UROD     | 0.5474 |
| ENSP00000358813 | TTK      | 0.5474 |
| ENSP00000333934 | TRMT11   | 0.5474 |
| ENSP00000368538 | TNFRSF4  | 0.5474 |
| ENSP00000414334 | TK2      | 0.5474 |
| ENSP00000338562 | STX3     | 0.5474 |
| ENSP00000359988 | SRSF11   | 0.5474 |
| ENSP00000262518 | SRCAP    | 0.5474 |
| ENSP00000313681 | SPHK1    | 0.5474 |
| ENSP00000240123 | SORBS3   | 0.5474 |
| ENSP00000267064 | SMARCC2  | 0.5474 |
| ENSP00000359729 | SLC9A6   | 0.5474 |
| ENSP00000281154 | SLC25A31 | 0.5474 |
| ENSP00000348215 | SH3PXD2A | 0.5474 |
| ENSP00000274063 | SFRP2    | 0.5474 |
| ENSP00000228463 | SELPLG   | 0.5474 |

|                 |          |        |
|-----------------|----------|--------|
| ENSP00000381823 | SEC24A   | 0.5474 |
| ENSP00000348918 | SAA1     | 0.5474 |
| ENSP00000358059 | RTN4IP1  | 0.5474 |
| ENSP00000353770 | RRM2     | 0.5474 |
| ENSP00000379888 | RPS8     | 0.5474 |
| ENSP00000321971 | RHOT2    | 0.5474 |
| ENSP00000311816 | REST     | 0.5474 |
| ENSP00000459789 | RCOR1    | 0.5474 |
| ENSP00000466834 | RAD51D   | 0.5474 |
| ENSP00000336701 | RAD51C   | 0.5474 |
| ENSP00000372155 | PSME1    | 0.5474 |
| ENSP00000440485 | PSMD9    | 0.5474 |
| ENSP00000359910 | PSMA7    | 0.5474 |
| ENSP00000240139 | PPP3CC   | 0.5474 |
| ENSP00000361446 | POLR3A   | 0.5474 |
| ENSP00000262039 | PIK3C3   | 0.5474 |
| ENSP00000420295 | PDE6B    | 0.5474 |
| ENSP00000258742 | NUPL2    | 0.5474 |
| ENSP00000362057 | NOX1     | 0.5474 |
| ENSP00000295886 | NKX6-1   | 0.5474 |
| ENSP00000272425 | NAT8     | 0.5474 |
| ENSP00000380444 | MYO9B    | 0.5474 |
| ENSP00000228841 | MYL2     | 0.5474 |
| ENSP00000370930 | MRPL23   | 0.5474 |
| ENSP00000358547 | MPP1     | 0.5474 |
| ENSP00000308208 | MMP14    | 0.5474 |
| ENSP00000370557 | MIS12    | 0.5474 |
| ENSP00000413632 | MCMDC2   | 0.5474 |
| ENSP00000451605 | MC1R     | 0.5474 |
| ENSP00000337354 | LIPA     | 0.5474 |
| ENSP00000401437 | LDB3     | 0.5474 |
| ENSP00000265023 | KNG1     | 0.5474 |
| ENSP00000369442 | KL       | 0.5474 |
| ENSP00000368699 | ISG15    | 0.5474 |
| ENSP00000378132 | IRX5     | 0.5474 |
| ENSP00000259206 | IL1RN    | 0.5474 |
| ENSP00000364801 | HSPA1B   | 0.5474 |
| ENSP00000325376 | HNRNPM   | 0.5474 |
| ENSP00000365370 | HNRNPCL1 | 0.5474 |
| ENSP00000382034 | HLA-DQB1 | 0.5474 |
| ENSP00000384774 | HK1      | 0.5474 |
| ENSP00000272937 | HES6     | 0.5474 |
| ENSP00000379228 | HECW1    | 0.5474 |
| ENSP00000431245 | GUCY1A2  | 0.5474 |
| ENSP00000053469 | GUCA1A   | 0.5474 |
| ENSP00000316598 | GTPBP6   | 0.5474 |
| ENSP00000381339 | GNAT3    | 0.5474 |
| ENSP00000347464 | GIT2     | 0.5474 |
| ENSP00000312673 | GH1      | 0.5474 |
| ENSP00000229416 | GCLC     | 0.5474 |
| ENSP00000425845 | FYB      | 0.5474 |
| ENSP00000341961 | FOXD4L3  | 0.5474 |
| ENSP00000216330 | FKBP3    | 0.5474 |

|                 |         |        |
|-----------------|---------|--------|
| ENSP00000263621 | ELANE   | 0.5474 |
| ENSP00000416250 | EIF2B1  | 0.5474 |
| ENSP00000417980 | EHMT1   | 0.5474 |
| ENSP00000301729 | ECI1    | 0.5474 |
| ENSP00000451995 | DUX4L5  | 0.5474 |
| ENSP00000362014 | DNM1    | 0.5474 |
| ENSP00000264065 | DNAJC10 | 0.5474 |
| ENSP00000199320 | DIMT1   | 0.5474 |
| ENSP00000424838 | DDX4    | 0.5474 |
| ENSP00000336725 | DDX3Y   | 0.5474 |
| ENSP00000242776 | DDX39A  | 0.5474 |
| ENSP00000421689 | CSNK1A1 | 0.5474 |
| ENSP00000321606 | CRMP1   | 0.5474 |
| ENSP00000356024 | CR2     | 0.5474 |
| ENSP00000264463 | CDH10   | 0.5474 |
| ENSP00000309181 | CCNE2   | 0.5474 |
| ENSP00000389009 | CARNS1  | 0.5474 |
| ENSP00000266376 | CACNA1C | 0.5474 |
| ENSP00000363773 | C1QA    | 0.5474 |
| ENSP00000310697 | BRSK2   | 0.5474 |
| ENSP00000318822 | BID     | 0.5474 |
| ENSP00000362993 | BICC1   | 0.5474 |
| ENSP00000273398 | ATP6V1A | 0.5474 |
| ENSP00000389649 | ATP5J   | 0.5474 |
| ENSP00000350310 | ATP2B4  | 0.5474 |
| ENSP00000261173 | ATP2B1  | 0.5474 |
| ENSP00000353072 | ATP2A3  | 0.5474 |
| ENSP00000253004 | ASS1    | 0.5474 |
| ENSP00000377380 | ARHGAP9 | 0.5474 |
| ENSP00000295897 | ALB     | 0.5474 |
| ENSP00000333019 | ADSSL1  | 0.5474 |
| ENSP00000297323 | ADCY1   | 0.5474 |
| ENSP00000216254 | ACO2    | 0.5474 |
| ENSP00000262710 | ACIN1   | 0.5474 |
| ENSP00000363868 | ABCA1   | 0.5474 |
| ENSP00000221167 | TUSC3   | 0.5474 |
| ENSP00000363055 | ZWINT   | 0.5447 |
| ENSP00000265351 | XPO5    | 0.5447 |
| ENSP00000219473 | USP10   | 0.5447 |
| ENSP00000268379 | UQCRC2  | 0.5447 |
| ENSP00000429562 | UNC13A  | 0.5447 |
| ENSP00000304697 | UBB     | 0.5447 |
| ENSP00000263321 | TYR     | 0.5447 |
| ENSP00000369081 | TXNDC5  | 0.5447 |
| ENSP00000361186 | TP53RK  | 0.5447 |
| ENSP00000371475 | TP53BP1 | 0.5447 |
| ENSP00000311579 | TNKS    | 0.5447 |
| ENSP00000399511 | TNIK    | 0.5447 |
| ENSP00000405455 | TKT     | 0.5447 |
| ENSP00000262768 | TIMP2   | 0.5447 |
| ENSP00000260129 | TGS1    | 0.5447 |
| ENSP00000345772 | TEAD3   | 0.5447 |
| ENSP00000390621 | TDRD12  | 0.5447 |

|                 |           |        |
|-----------------|-----------|--------|
| ENSP00000217964 | TBL1X     | 0.5447 |
| ENSP00000329967 | TBK1      | 0.5447 |
| ENSP00000336724 | TBC1D22A  | 0.5447 |
| ENSP00000350719 | SYNE2     | 0.5447 |
| ENSP00000348069 | SREBF1    | 0.5447 |
| ENSP00000230085 | SNX3      | 0.5447 |
| ENSP00000317123 | SNRNP200  | 0.5447 |
| ENSP00000249647 | SNAP23    | 0.5447 |
| ENSP00000355924 | SMYD2     | 0.5447 |
| ENSP00000341382 | SMC4      | 0.5447 |
| ENSP00000253270 | SLC35D2   | 0.5447 |
| ENSP00000360181 | SH2D1A    | 0.5447 |
| ENSP00000221566 | SGTA      | 0.5447 |
| ENSP00000266066 | SFRP5     | 0.5447 |
| ENSP00000360034 | SERBP1    | 0.5447 |
| ENSP00000251900 | SCML2     | 0.5447 |
| ENSP00000472465 | SARS2     | 0.5447 |
| ENSP00000379339 | RPS29     | 0.5447 |
| ENSP00000363676 | RPL11     | 0.5447 |
| ENSP00000298283 | RPL10L    | 0.5447 |
| ENSP00000216274 | RIPK3     | 0.5447 |
| ENSP00000313890 | RBM15B    | 0.5447 |
| ENSP00000316589 | RANBP10   | 0.5447 |
| ENSP00000372088 | RAD51     | 0.5447 |
| ENSP00000323867 | PRKAG1    | 0.5447 |
| ENSP00000343190 | PPCDC     | 0.5447 |
| ENSP00000403852 | POLR2F    | 0.5447 |
| ENSP00000265849 | PMS2      | 0.5447 |
| ENSP00000268261 | PMM2      | 0.5447 |
| ENSP00000323194 | PLXNA4    | 0.5447 |
| ENSP00000282903 | PLOD2     | 0.5447 |
| ENSP00000260766 | PLCE1     | 0.5447 |
| ENSP00000337797 | PIDD      | 0.5447 |
| ENSP00000271657 | PI4KB     | 0.5447 |
| ENSP00000332116 | PDE4B     | 0.5447 |
| ENSP00000233630 | PCGF1     | 0.5447 |
| ENSP00000298281 | PCF11     | 0.5447 |
| ENSP00000322957 | PAK7      | 0.5447 |
| ENSP00000362618 | PABPC1L2A | 0.5447 |
| ENSP00000264151 | OSGEPL1   | 0.5447 |
| ENSP00000360621 | ORC1      | 0.5447 |
| ENSP00000357838 | OAT       | 0.5447 |
| ENSP00000261396 | NUP133    | 0.5447 |
| ENSP00000301490 | NUDT8     | 0.5447 |
| ENSP00000274606 | NHP2      | 0.5447 |
| ENSP00000368856 | NFX1      | 0.5447 |
| ENSP00000357206 | NES       | 0.5447 |
| ENSP00000347988 | NDUFA5    | 0.5447 |
| ENSP00000252102 | NDUFA2    | 0.5447 |
| ENSP00000294785 | NCSTN     | 0.5447 |
| ENSP00000293373 | NCKAP1L   | 0.5447 |
| ENSP00000265433 | NBN       | 0.5447 |
| ENSP00000205890 | MYO15A    | 0.5447 |

|                 |             |        |
|-----------------|-------------|--------|
| ENSP00000420714 | MRPS14      | 0.5447 |
| ENSP00000373404 | MRPL2       | 0.5447 |
| ENSP00000233616 | MOGS        | 0.5447 |
| ENSP00000267273 | METTLL21C   | 0.5447 |
| ENSP00000323720 | MED14       | 0.5447 |
| ENSP00000262027 | MARS        | 0.5447 |
| ENSP00000263925 | LNX1        | 0.5447 |
| ENSP00000294638 | LHX8        | 0.5447 |
| ENSP00000267436 | L2HGDH      | 0.5447 |
| ENSP00000322791 | KIF1A       | 0.5447 |
| ENSP00000369989 | KATNAL1     | 0.5447 |
| ENSP00000287239 | KAT6B       | 0.5447 |
| ENSP00000355988 | IRF6        | 0.5447 |
| ENSP00000369312 | IL15RA      | 0.5447 |
| ENSP00000370473 | IGFBP3      | 0.5447 |
| ENSP00000229135 | IFNG        | 0.5447 |
| ENSP00000217901 | IDH3G       | 0.5447 |
| ENSP00000219439 | HSDL1       | 0.5447 |
| ENSP00000309336 | HOXC5       | 0.5447 |
| ENSP00000338477 | HNRNPF      | 0.5447 |
| ENSP00000314080 | HIC1        | 0.5447 |
| ENSP00000374353 | HAGHL       | 0.5447 |
| ENSP00000377969 | GTF2F1      | 0.5447 |
| ENSP00000225567 | GOSR2       | 0.5447 |
| ENSP00000248572 | GNGT1       | 0.5447 |
| ENSP00000248996 | GNAZ        | 0.5447 |
| ENSP00000232461 | GNAT1       | 0.5447 |
| ENSP00000277865 | GLUD1       | 0.5447 |
| ENSP00000252506 | GADD45G     | 0.5447 |
| ENSP00000180166 | FGF20       | 0.5447 |
| ENSP00000424243 | EYS         | 0.5447 |
| ENSP00000312385 | EVX2        | 0.5447 |
| ENSP00000376684 | EPHB6       | 0.5447 |
| ENSP00000301825 | ENTPD3      | 0.5447 |
| ENSP00000438513 | DUX4L4      | 0.5447 |
| ENSP00000365272 | DLG2        | 0.5447 |
| ENSP00000210060 | DHPS        | 0.5447 |
| ENSP00000319170 | DHFRL1      | 0.5447 |
| ENSP00000360828 | DDX27       | 0.5447 |
| ENSP00000304994 | DACH1       | 0.5447 |
| ENSP00000355013 | CTR9        | 0.5447 |
| ENSP00000307134 | CTNND2      | 0.5447 |
| ENSP00000319343 | CPT1C       | 0.5447 |
| ENSP00000292476 | CPSF4       | 0.5447 |
| ENSP00000300107 | CLPX        | 0.5447 |
| ENSP00000262662 | CDKN2C      | 0.5447 |
| ENSP00000217372 | CDK5RAP1    | 0.5447 |
| ENSP00000354826 | CALD1       | 0.5447 |
| ENSP00000360664 | BTF3L4      | 0.5447 |
| ENSP00000375082 | BORA        | 0.5447 |
| ENSP00000346437 | ATG7        | 0.5447 |
| ENSP00000339016 | ATAD1       | 0.5447 |
| ENSP00000380427 | ARPC4-TTLL3 | 0.5447 |

|                 |              |        |
|-----------------|--------------|--------|
| ENSP00000411459 | ARHGEF28     | 0.5447 |
| ENSP00000216714 | APEX1        | 0.5447 |
| ENSP00000296511 | ANXA5        | 0.5447 |
| ENSP00000256578 | AMPD2        | 0.5447 |
| ENSP00000384881 | ABCB5        | 0.5447 |
| ENSP00000228251 | YBX3         | 0.5421 |
| ENSP00000349658 | XPNPEP3      | 0.5421 |
| ENSP00000342381 | VRK2         | 0.5421 |
| ENSP00000361635 | VDAC2        | 0.5421 |
| ENSP00000339957 | USP47        | 0.5421 |
| ENSP00000309565 | UQCRH        | 0.5421 |
| ENSP00000296328 | UBXN7        | 0.5421 |
| ENSP00000356243 | UBE2T        | 0.5421 |
| ENSP00000315644 | TYMS         | 0.5421 |
| ENSP00000370034 | TLR7         | 0.5421 |
| ENSP00000276692 | TATDN1       | 0.5421 |
| ENSP00000409667 | SYNJ1        | 0.5421 |
| ENSP00000258301 | STX6         | 0.5421 |
| ENSP00000365730 | STK24        | 0.5421 |
| ENSP00000278412 | SSRP1        | 0.5421 |
| ENSP00000420195 | SRSF10       | 0.5421 |
| ENSP00000266735 | SNRPF        | 0.5421 |
| ENSP00000255175 | SERINC3      | 0.5421 |
| ENSP00000345445 | SAMM50       | 0.5421 |
| ENSP00000359035 | RTEL1        | 0.5421 |
| ENSP00000272190 | REN          | 0.5421 |
| ENSP00000321239 | RCHY1        | 0.5421 |
| ENSP00000384192 | RASGRP3      | 0.5421 |
| ENSP00000386520 | RAD54L2      | 0.5421 |
| ENSP00000264025 | PVRL1        | 0.5421 |
| ENSP00000292644 | PSMC2        | 0.5421 |
| ENSP00000363993 | PSMB9        | 0.5421 |
| ENSP00000216455 | PSMA3        | 0.5421 |
| ENSP00000325074 | PPP2R2A      | 0.5421 |
| ENSP00000230732 | POU4F3       | 0.5421 |
| ENSP00000342889 | POLR2K       | 0.5421 |
| ENSP00000219252 | POLR2C       | 0.5421 |
| ENSP00000405950 | PNCK         | 0.5421 |
| ENSP00000361275 | PLK3         | 0.5421 |
| ENSP00000338185 | PLCB1        | 0.5421 |
| ENSP00000471914 | PIK3R2       | 0.5421 |
| ENSP00000360473 | PFDN4        | 0.5421 |
| ENSP00000313851 | PDS5B        | 0.5421 |
| ENSP00000339906 | PAX4         | 0.5421 |
| ENSP00000353864 | PAK3         | 0.5421 |
| ENSP00000244458 | PACSIN1      | 0.5421 |
| ENSP00000343819 | OTX2         | 0.5421 |
| ENSP00000339479 | NT5C2        | 0.5421 |
| ENSP00000433415 | NT5C1B-RDH14 | 0.5421 |
| ENSP00000220931 | NCALD        | 0.5421 |
| ENSP00000348349 | MYO9A        | 0.5421 |
| ENSP00000386331 | MYO7A        | 0.5421 |
| ENSP00000358994 | MYO6         | 0.5421 |



|                 |         |        |
|-----------------|---------|--------|
| ENSP00000207437 | MYL6B   | 0.5421 |
| ENSP00000446714 | MYL6    | 0.5421 |
| ENSP00000435591 | MUC5AC  | 0.5421 |
| ENSP00000376800 | MTPN    | 0.5421 |
| ENSP00000333633 | MTA1    | 0.5421 |
| ENSP00000296473 | MON1A   | 0.5421 |
| ENSP00000257745 | MLL5    | 0.5421 |
| ENSP00000281453 | MLF1IP  | 0.5421 |
| ENSP00000364946 | MKX     | 0.5421 |
| ENSP00000351664 | MICAL1  | 0.5421 |
| ENSP00000228938 | MGP     | 0.5421 |
| ENSP00000447378 | MGAM    | 0.5421 |
| ENSP00000230321 | MDFI    | 0.5421 |
| ENSP00000314505 | MCM9    | 0.5421 |
| ENSP00000367309 | MAOB    | 0.5421 |
| ENSP00000400365 | LAMA2   | 0.5421 |
| ENSP00000290759 | ISL2    | 0.5421 |
| ENSP00000290552 | IRX6    | 0.5421 |
| ENSP00000303231 | IL12A   | 0.5421 |
| ENSP00000299518 | IDH3A   | 0.5421 |
| ENSP00000233893 | HSPE1   | 0.5421 |
| ENSP00000357440 | HSF2    | 0.5421 |
| ENSP00000259667 | HINT2   | 0.5421 |
| ENSP00000393198 | HES4    | 0.5421 |
| ENSP00000261195 | GYS2    | 0.5421 |
| ENSP00000452454 | GTF2A1  | 0.5421 |
| ENSP00000304331 | GSX1    | 0.5421 |
| ENSP00000359864 | GPC4    | 0.5421 |
| ENSP00000341848 | GOLGB1  | 0.5421 |
| ENSP00000232564 | GNB4    | 0.5421 |
| ENSP00000370737 | GLDC    | 0.5421 |
| ENSP00000368226 | GK      | 0.5421 |
| ENSP00000410833 | GBE1    | 0.5421 |
| ENSP00000299162 | FOXN4   | 0.5421 |
| ENSP00000370373 | FKBP1B  | 0.5421 |
| ENSP00000237837 | FGF23   | 0.5421 |
| ENSP00000276326 | FBXO25  | 0.5421 |
| ENSP00000431822 | FAU     | 0.5421 |
| ENSP00000359939 | EXOSC1  | 0.5421 |
| ENSP00000370330 | ERBB2IP | 0.5421 |
| ENSP00000268933 | EPN3    | 0.5421 |
| ENSP00000430269 | EPHX2   | 0.5421 |
| ENSP00000338481 | EPB41L2 | 0.5421 |
| ENSP00000234590 | ENO1    | 0.5421 |
| ENSP00000348842 | EML6    | 0.5421 |
| ENSP00000289371 | EIF5B   | 0.5421 |
| ENSP00000425561 | EIF4E   | 0.5421 |
| ENSP00000429931 | EIF3H   | 0.5421 |
| ENSP00000332604 | EIF3C   | 0.5421 |
| ENSP00000312789 | DYRK1B  | 0.5421 |
| ENSP00000451304 | DUX4    | 0.5421 |
| ENSP00000225171 | DNAJC12 | 0.5421 |
| ENSP00000256996 | DDB2    | 0.5421 |

|                 |          |        |
|-----------------|----------|--------|
| ENSP00000264161 | DARS     | 0.5421 |
| ENSP00000386884 | CXCR4    | 0.5421 |
| ENSP00000353904 | CSNK1G3  | 0.5421 |
| ENSP00000298875 | CPSF2    | 0.5421 |
| ENSP00000006101 | COPZ2    | 0.5421 |
| ENSP00000299259 | COPS2    | 0.5421 |
| ENSP00000357048 | COPA     | 0.5421 |
| ENSP00000340937 | COL17A1  | 0.5421 |
| ENSP00000464814 | COASY    | 0.5421 |
| ENSP00000265689 | CHKA     | 0.5421 |
| ENSP00000262608 | CECR2    | 0.5421 |
| ENSP00000286788 | CCT8     | 0.5421 |
| ENSP00000256897 | CCNH     | 0.5421 |
| ENSP00000247461 | CANX     | 0.5421 |
| ENSP00000343741 | ATR      | 0.5421 |
| ENSP00000340896 | ASH2L    | 0.5421 |
| ENSP00000365411 | APBB1IP  | 0.5421 |
| ENSP00000263640 | ACVR1    | 0.5421 |
| ENSP00000344789 | ACACA    | 0.5421 |
| ENSP00000379847 | ZNF143   | 0.5395 |
| ENSP00000426964 | YJEFN3   | 0.5395 |
| ENSP00000362677 | WDR38    | 0.5395 |
| ENSP00000309457 | VPS41    | 0.5395 |
| ENSP00000353422 | VPS13A   | 0.5395 |
| ENSP00000287022 | UQCRB    | 0.5395 |
| ENSP00000332887 | UQCR10   | 0.5395 |
| ENSP00000348708 | UPF2     | 0.5395 |
| ENSP00000242576 | UNG      | 0.5395 |
| ENSP00000346155 | UCKL1    | 0.5395 |
| ENSP00000363019 | UBE2D1   | 0.5395 |
| ENSP00000320295 | TUBB3    | 0.5395 |
| ENSP00000301072 | TUBA1C   | 0.5395 |
| ENSP00000267890 | TTBK2    | 0.5395 |
| ENSP00000341838 | TNNI3    | 0.5395 |
| ENSP00000265131 | TNC      | 0.5395 |
| ENSP00000327315 | TIAM2    | 0.5395 |
| ENSP00000383892 | TFIP11   | 0.5395 |
| ENSP00000240328 | TBX2     | 0.5395 |
| ENSP00000358060 | TARS2    | 0.5395 |
| ENSP00000330219 | SYN3     | 0.5395 |
| ENSP00000295709 | STK36    | 0.5395 |
| ENSP00000360992 | STAMBPL1 | 0.5395 |
| ENSP00000263736 | SRBD1    | 0.5395 |
| ENSP00000325785 | SPECC1L  | 0.5395 |
| ENSP00000381034 | SOCS6    | 0.5395 |
| ENSP00000342374 | SNRPD2   | 0.5395 |
| ENSP00000215730 | SNAP29   | 0.5395 |
| ENSP00000402515 | SMG1     | 0.5395 |
| ENSP00000249396 | SIRT2    | 0.5395 |
| ENSP00000370839 | SGCB     | 0.5395 |
| ENSP00000362110 | SF3A3    | 0.5395 |
| ENSP00000303540 | SCN1A    | 0.5395 |
| ENSP00000254663 | SCLY     | 0.5395 |

|                 |               |        |
|-----------------|---------------|--------|
| ENSP00000386444 | SAG           | 0.5395 |
| ENSP00000260443 | RSL24D1       | 0.5395 |
| ENSP00000258955 | RSAD1         | 0.5395 |
| ENSP00000377865 | RPL23         | 0.5395 |
| ENSP00000363018 | RPL10A        | 0.5395 |
| ENSP00000301730 | RNPS1         | 0.5395 |
| ENSP00000338864 | RASGRP2       | 0.5395 |
| ENSP00000335029 | RASA3         | 0.5395 |
| ENSP00000290101 | RAP1GAP       | 0.5395 |
| ENSP00000220966 | PYCRL         | 0.5395 |
| ENSP00000396937 | PSMD13        | 0.5395 |
| ENSP00000222266 | PSENE1        | 0.5395 |
| ENSP00000326366 | PSEN1         | 0.5395 |
| ENSP00000363313 | PRPF4         | 0.5395 |
| ENSP00000235372 | PRDM2         | 0.5395 |
| ENSP00000324124 | POLR2L        | 0.5395 |
| ENSP00000473036 | PNMAL2        | 0.5395 |
| ENSP00000376765 | PIAS3         | 0.5395 |
| ENSP00000363003 | PHF19         | 0.5395 |
| ENSP00000263666 | PDZRN3        | 0.5395 |
| ENSP00000291539 | PDE9A         | 0.5395 |
| ENSP00000270474 | PDE4A         | 0.5395 |
| ENSP00000331487 | NPLOC4        | 0.5395 |
| ENSP00000219302 | NME3          | 0.5395 |
| ENSP00000264187 | NID1          | 0.5395 |
| ENSP00000263774 | NDUFS3        | 0.5395 |
| ENSP00000286794 | NAA11         | 0.5395 |
| ENSP00000324527 | MYO1D         | 0.5395 |
| ENSP00000292327 | MYL3          | 0.5395 |
| ENSP00000359321 | MTF2          | 0.5395 |
| ENSP00000244051 | MOCS3         | 0.5395 |
| ENSP00000380157 | MOCS2         | 0.5395 |
| ENSP00000162023 | MEF2B1B-MEF2B | 0.5395 |
| ENSP00000314776 | MBLAC2        | 0.5395 |
| ENSP00000354573 | MACF1         | 0.5395 |
| ENSP00000431284 | LPXN          | 0.5395 |
| ENSP00000264144 | LAMC2         | 0.5395 |
| ENSP00000222399 | LAMB1         | 0.5395 |
| ENSP00000343701 | KPNA1         | 0.5395 |
| ENSP00000334140 | KLHDC10       | 0.5395 |
| ENSP00000348108 | KHDRBS3       | 0.5395 |
| ENSP00000311202 | KCTD13        | 0.5395 |
| ENSP00000386896 | ITGA6         | 0.5395 |
| ENSP00000231357 | IRX4          | 0.5395 |
| ENSP00000226284 | IBSP          | 0.5395 |
| ENSP00000262854 | HUWE1         | 0.5395 |
| ENSP00000357980 | HTRA1         | 0.5395 |
| ENSP00000264009 | HSF4          | 0.5395 |
| ENSP00000375863 | HNRNPUL1      | 0.5395 |
| ENSP00000316042 | HNRNPA0       | 0.5395 |
| ENSP00000379701 | HNF4G         | 0.5395 |
| ENSP00000346643 | HKDC1         | 0.5395 |
| ENSP00000290573 | HK2           | 0.5395 |

|                 |          |        |
|-----------------|----------|--------|
| ENSP00000368066 | HAO1     | 0.5395 |
| ENSP00000319799 | H1FOO    | 0.5395 |
| ENSP00000379839 | GNE      | 0.5395 |
| ENSP00000328570 | GLRX5    | 0.5395 |
| ENSP00000358866 | FLNA     | 0.5395 |
| ENSP00000342087 | FHIT     | 0.5395 |
| ENSP00000359635 | FGF13    | 0.5395 |
| ENSP00000293829 | FGF11    | 0.5395 |
| ENSP00000252771 | FCHO1    | 0.5395 |
| ENSP00000289779 | F11R     | 0.5395 |
| ENSP00000254928 | ERAL1    | 0.5395 |
| ENSP00000374323 | EPHA6    | 0.5395 |
| ENSP00000275815 | EPHA1    | 0.5395 |
| ENSP00000253039 | EIF2S3   | 0.5395 |
| ENSP00000250457 | EGLN3    | 0.5395 |
| ENSP00000358596 | DUSP5    | 0.5395 |
| ENSP00000270223 | DMWD     | 0.5395 |
| ENSP00000369213 | DDX58    | 0.5395 |
| ENSP00000303356 | DCXR     | 0.5395 |
| ENSP00000408910 | DCTN2    | 0.5395 |
| ENSP00000349576 | DCTD     | 0.5395 |
| ENSP00000342070 | CTSB     | 0.5395 |
| ENSP00000394227 | CSF2RA   | 0.5395 |
| ENSP00000317780 | COX5A    | 0.5395 |
| ENSP00000261070 | COX17    | 0.5395 |
| ENSP00000288532 | COQ5     | 0.5395 |
| ENSP00000329419 | COPB2    | 0.5395 |
| ENSP00000379866 | COL4A4   | 0.5395 |
| ENSP00000295522 | CLDN1    | 0.5395 |
| ENSP00000220913 | CHRAC1   | 0.5395 |
| ENSP00000350386 | CHM      | 0.5395 |
| ENSP00000342510 | CEP97    | 0.5395 |
| ENSP00000274170 | CDH18    | 0.5395 |
| ENSP00000276014 | CCNB3    | 0.5395 |
| ENSP00000405533 | CCL4L1   | 0.5395 |
| ENSP00000336687 | CBX3     | 0.5395 |
| ENSP00000420381 | CALU     | 0.5395 |
| ENSP00000307508 | CALB2    | 0.5395 |
| ENSP00000259008 | BRIP1    | 0.5395 |
| ENSP00000370003 | BNIP3L   | 0.5395 |
| ENSP00000267859 | BNIP2    | 0.5395 |
| ENSP00000447537 | BLOC1S1  | 0.5395 |
| ENSP00000392330 | BCAP31   | 0.5395 |
| ENSP00000301587 | ATP5H    | 0.5395 |
| ENSP00000243997 | ATP5E    | 0.5395 |
| ENSP00000339182 | ATP13A4  | 0.5395 |
| ENSP00000289968 | ARHGAP17 | 0.5395 |
| ENSP00000314615 | ARFGAP1  | 0.5395 |
| ENSP00000239440 | ARAP3    | 0.5395 |
| ENSP00000364126 | APEX2    | 0.5395 |
| ENSP00000346032 | ANXA2    | 0.5395 |
| ENSP00000332369 | ALAS2    | 0.5395 |
| ENSP00000352584 | AKR1B10  | 0.5395 |

|                 |                 |        |
|-----------------|-----------------|--------|
| ENSP00000362300 | AGO1            | 0.5395 |
| ENSP00000305372 | ADRB2           | 0.5395 |
| ENSP00000358301 | ADRB1           | 0.5395 |
| ENSP00000442656 | ACVR1B          | 0.5395 |
| ENSP00000224784 | ACTA2           | 0.5395 |
| ENSP00000303211 | ACHE            | 0.5395 |
| ENSP00000356015 | ACAT2           | 0.5395 |
| ENSP00000357873 | ACADSB          | 0.5395 |
| ENSP00000244571 | AARS2           | 0.5395 |
| ENSP00000450811 | ENSG00000259131 | 0.5395 |
| ENSP00000302790 | XPO6            | 0.5368 |
| ENSP00000427772 | WWC1            | 0.5368 |
| ENSP00000293879 | WDR90           | 0.5368 |
| ENSP00000330381 | WDR5B           | 0.5368 |
| ENSP00000263559 | VPS26A          | 0.5368 |
| ENSP00000307863 | U2AF2           | 0.5368 |
| ENSP00000416959 | TRA2B           | 0.5368 |
| ENSP00000263525 | TNR             | 0.5368 |
| ENSP00000226225 | TNFAIP1         | 0.5368 |
| ENSP00000406293 | TCEA3           | 0.5368 |
| ENSP00000299328 | TAZ             | 0.5368 |
| ENSP00000240185 | TARDBP          | 0.5368 |
| ENSP00000294179 | STX5            | 0.5368 |
| ENSP00000336655 | STRADA          | 0.5368 |
| ENSP00000361892 | STK4            | 0.5368 |
| ENSP00000472998 | SNRNP70         | 0.5368 |
| ENSP00000254976 | SNAP25          | 0.5368 |
| ENSP00000360163 | SMARCA1         | 0.5368 |
| ENSP00000288840 | SMAD6           | 0.5368 |
| ENSP00000316152 | SFTPC           | 0.5368 |
| ENSP00000305790 | SF3B3           | 0.5368 |
| ENSP00000356953 | SDHC            | 0.5368 |
| ENSP00000264932 | SDHA            | 0.5368 |
| ENSP00000371973 | SAP18           | 0.5368 |
| ENSP00000311430 | RPL4            | 0.5368 |
| ENSP00000309334 | RPL15           | 0.5368 |
| ENSP00000253303 | RGN             | 0.5368 |
| ENSP00000294904 | RBMS1           | 0.5368 |
| ENSP00000230419 | PTK7            | 0.5368 |
| ENSP00000348442 | PSMD12          | 0.5368 |
| ENSP00000259457 | PSMB7           | 0.5368 |
| ENSP00000270586 | PSMB6           | 0.5368 |
| ENSP00000044462 | PSMA4           | 0.5368 |
| ENSP00000392262 | PPP5D1          | 0.5368 |
| ENSP00000306682 | PPM1D           | 0.5368 |
| ENSP00000306614 | PPIH            | 0.5368 |
| ENSP00000308938 | PLG             | 0.5368 |
| ENSP00000430344 | PLCD1           | 0.5368 |
| ENSP00000361850 | PLAU            | 0.5368 |
| ENSP00000333024 | PHF7            | 0.5368 |
| ENSP00000216252 | PHF5A           | 0.5368 |
| ENSP00000370517 | PFKP            | 0.5368 |
| ENSP00000269848 | PFKL            | 0.5368 |

|                 |          |        |
|-----------------|----------|--------|
| ENSP00000307259 | P2RY12   | 0.5368 |
| ENSP00000234296 | ORC2     | 0.5368 |
| ENSP00000231498 | NUP155   | 0.5368 |
| ENSP00000282516 | NIPBL    | 0.5368 |
| ENSP00000380505 | NEB      | 0.5368 |
| ENSP00000255120 | NASP     | 0.5368 |
| ENSP00000303584 | N6AMT1   | 0.5368 |
| ENSP00000306382 | MYO1B    | 0.5368 |
| ENSP00000301012 | MVD      | 0.5368 |
| ENSP00000257068 | MTNR1B   | 0.5368 |
| ENSP00000356290 | MTHFD1L  | 0.5368 |
| ENSP00000354982 | MT-CO3   | 0.5368 |
| ENSP00000377486 | MRPL19   | 0.5368 |
| ENSP00000262966 | MPND     | 0.5368 |
| ENSP00000355775 | MIXL1    | 0.5368 |
| ENSP00000321684 | MEOX1    | 0.5368 |
| ENSP00000307288 | MCM7     | 0.5368 |
| ENSP00000282276 | MARS2    | 0.5368 |
| ENSP00000261845 | MAPK6    | 0.5368 |
| ENSP00000266718 | LUM      | 0.5368 |
| ENSP00000367498 | LRRC47   | 0.5368 |
| ENSP00000285737 | LONP2    | 0.5368 |
| ENSP00000259708 | KLC4     | 0.5368 |
| ENSP00000247986 | KIF17    | 0.5368 |
| ENSP00000323659 | KDM3A    | 0.5368 |
| ENSP00000406037 | KAT8     | 0.5368 |
| ENSP00000323580 | IFT88    | 0.5368 |
| ENSP00000384144 | HYOU1    | 0.5368 |
| ENSP00000258080 | HTRA2    | 0.5368 |
| ENSP00000303394 | HSPB3    | 0.5368 |
| ENSP00000254963 | HSPA12B  | 0.5368 |
| ENSP00000381785 | HSDL2    | 0.5368 |
| ENSP00000278353 | HSD17B12 | 0.5368 |
| ENSP00000331741 | HOXB2    | 0.5368 |
| ENSP00000222718 | HOXA2    | 0.5368 |
| ENSP00000281543 | GUF1     | 0.5368 |
| ENSP00000301149 | GPD1     | 0.5368 |
| ENSP00000330836 | GLRX3    | 0.5368 |
| ENSP00000282841 | GGPS1    | 0.5368 |
| ENSP00000252809 | GDF15    | 0.5368 |
| ENSP00000343633 | FOXN2    | 0.5368 |
| ENSP00000354620 | FOXJ3    | 0.5368 |
| ENSP00000252037 | FKBP6    | 0.5368 |
| ENSP00000353741 | ETF1     | 0.5368 |
| ENSP00000278927 | ESAM     | 0.5368 |
| ENSP00000354238 | ENPP1    | 0.5368 |
| ENSP00000363559 | EIF6     | 0.5368 |
| ENSP00000216554 | EIF5     | 0.5368 |
| ENSP00000262056 | EIF4B    | 0.5368 |
| ENSP00000253108 | EIF3G    | 0.5368 |
| ENSP00000353575 | EIF2B3   | 0.5368 |
| ENSP00000266126 | EIF2B2   | 0.5368 |
| ENSP00000368683 | EDN1     | 0.5368 |

|                 |         |        |
|-----------------|---------|--------|
| ENSP00000362850 | DSN1    | 0.5368 |
| ENSP00000359290 | DR1     | 0.5368 |
| ENSP00000396308 | DHFR    | 0.5368 |
| ENSP00000337697 | DCX     | 0.5368 |
| ENSP00000259632 | DCTN3   | 0.5368 |
| ENSP00000384573 | DAZ1    | 0.5368 |
| ENSP00000221996 | CRX     | 0.5368 |
| ENSP00000238112 | CPSF3   | 0.5368 |
| ENSP00000355180 | COL6A1  | 0.5368 |
| ENSP00000351682 | CNDP1   | 0.5368 |
| ENSP00000405575 | CHMP3   | 0.5368 |
| ENSP00000317902 | CEP57   | 0.5368 |
| ENSP00000360540 | CEP55   | 0.5368 |
| ENSP00000299564 | CDYL2   | 0.5368 |
| ENSP00000274695 | CDKAL1  | 0.5368 |
| ENSP00000304370 | CDC40   | 0.5368 |
| ENSP00000354916 | CDC14A  | 0.5368 |
| ENSP00000009180 | CD9     | 0.5368 |
| ENSP00000315477 | CD209   | 0.5368 |
| ENSP00000292314 | CCDC12  | 0.5368 |
| ENSP00000279247 | CAPN1   | 0.5368 |
| ENSP00000355192 | CACNA1S | 0.5368 |
| ENSP00000350267 | BRPF3   | 0.5368 |
| ENSP00000220659 | BRF2    | 0.5368 |
| ENSP00000320509 | BANK1   | 0.5368 |
| ENSP00000307875 | B3GAT1  | 0.5368 |
| ENSP00000301178 | AXL     | 0.5368 |
| ENSP00000378917 | ATXN2L  | 0.5368 |
| ENSP00000349595 | ATP2A1  | 0.5368 |
| ENSP00000357060 | ATP1A4  | 0.5368 |
| ENSP00000349877 | ATP13A1 | 0.5368 |
| ENSP00000425107 | ATG12   | 0.5368 |
| ENSP00000263207 | ARVCF   | 0.5368 |
| ENSP00000261842 | AP4E1   | 0.5368 |
| ENSP00000312442 | AP1G2   | 0.5368 |
| ENSP00000280772 | ANK3    | 0.5368 |
| ENSP00000358814 | AHCYL1  | 0.5368 |
| ENSP00000254235 | ADCY7   | 0.5368 |
| ENSP00000237612 | ABCG2   | 0.5368 |
| ENSP00000384863 | XPO1    | 0.5342 |
| ENSP00000406084 | WDR20   | 0.5342 |
| ENSP00000365891 | WAS     | 0.5342 |
| ENSP00000265333 | VDAC1   | 0.5342 |
| ENSP00000265077 | VCAN    | 0.5342 |
| ENSP00000364815 | VARS    | 0.5342 |
| ENSP00000258399 | USP37   | 0.5342 |
| ENSP00000364448 | UPF3A   | 0.5342 |
| ENSP00000217133 | TUBB1   | 0.5342 |
| ENSP00000248437 | TUBA4A  | 0.5342 |
| ENSP00000298746 | TRUB1   | 0.5342 |
| ENSP00000283943 | TRIP12  | 0.5342 |
| ENSP00000295756 | TRAT1   | 0.5342 |
| ENSP00000302783 | TRAPPC1 | 0.5342 |

|                 |                |        |
|-----------------|----------------|--------|
| ENSP00000318820 | TPO            | 0.5342 |
| ENSP00000328835 | TOP1MT         | 0.5342 |
| ENSP00000371341 | TNK2           | 0.5342 |
| ENSP00000263932 | TNFRSF8        | 0.5342 |
| ENSP00000465500 | TNFRSF11A      | 0.5342 |
| ENSP00000303145 | TMED10         | 0.5342 |
| ENSP00000386341 | TICAM2         | 0.5342 |
| ENSP00000260356 | THBS1          | 0.5342 |
| ENSP00000362979 | TGIF2          | 0.5342 |
| ENSP00000367406 | TAF2           | 0.5342 |
| ENSP00000367208 | SUGT1          | 0.5342 |
| ENSP00000367923 | SUCLA2         | 0.5342 |
| ENSP00000360310 | SPO11          | 0.5342 |
| ENSP00000245222 | SPHK2          | 0.5342 |
| ENSP00000445829 | SLC39A11       | 0.5342 |
| ENSP00000333667 | SHMT2          | 0.5342 |
| ENSP00000345193 | SHANK2         | 0.5342 |
| ENSP00000373354 | SETMAR         | 0.5342 |
| ENSP00000399518 | SATB1          | 0.5342 |
| ENSP00000346294 | S100A4         | 0.5342 |
| ENSP00000296084 | RYK            | 0.5342 |
| ENSP00000457868 | RTEL1-TNFRSF6B | 0.5342 |
| ENSP00000217260 | RSPO4          | 0.5342 |
| ENSP00000300738 | RRM1           | 0.5342 |
| ENSP00000373331 | RPUSD3         | 0.5342 |
| ENSP00000470004 | RPS19          | 0.5342 |
| ENSP00000237530 | RPN2           | 0.5342 |
| ENSP00000386717 | RPL31          | 0.5342 |
| ENSP00000417335 | ROBO2          | 0.5342 |
| ENSP00000221486 | RNASEH2A       | 0.5342 |
| ENSP00000365926 | RFK            | 0.5342 |
| ENSP00000254901 | REEP2          | 0.5342 |
| ENSP00000371169 | RCL1           | 0.5342 |
| ENSP00000391723 | PUM1           | 0.5342 |
| ENSP00000352833 | PTPN22         | 0.5342 |
| ENSP00000356438 | PTGS2          | 0.5342 |
| ENSP00000334499 | PTBP3          | 0.5342 |
| ENSP00000365175 | PRRC2A         | 0.5342 |
| ENSP00000366488 | PRKACG         | 0.5342 |
| ENSP00000362803 | PPIL1          | 0.5342 |
| ENSP00000264220 | PPAT           | 0.5342 |
| ENSP00000263331 | POLR1B         | 0.5342 |
| ENSP00000442563 | POLG2          | 0.5342 |
| ENSP00000271715 | POGZ           | 0.5342 |
| ENSP00000356000 | PLXNA2         | 0.5342 |
| ENSP00000196061 | PLOD1          | 0.5342 |
| ENSP00000359019 | PITX3          | 0.5342 |
| ENSP00000360124 | PGM1           | 0.5342 |
| ENSP00000322170 | PFN4           | 0.5342 |
| ENSP00000286091 | PDIA4          | 0.5342 |
| ENSP00000360502 | PDE6C          | 0.5342 |
| ENSP00000347046 | PDE5A          | 0.5342 |
| ENSP00000216277 | PAPOLA         | 0.5342 |



|                 |          |        |
|-----------------|----------|--------|
| ENSP00000230859 | PAPD7    | 0.5342 |
| ENSP00000308012 | PABPC5   | 0.5342 |
| ENSP00000462986 | PABPC4L  | 0.5342 |
| ENSP00000304858 | ORMDL3   | 0.5342 |
| ENSP00000264279 | NOP58    | 0.5342 |
| ENSP00000199447 | NME8     | 0.5342 |
| ENSP00000363205 | NFS1     | 0.5342 |
| ENSP00000306754 | NEUROD2  | 0.5342 |
| ENSP00000261908 | NEO1     | 0.5342 |
| ENSP00000391942 | NECAP2   | 0.5342 |
| ENSP00000369176 | NDUFB6   | 0.5342 |
| ENSP00000265944 | MYO3A    | 0.5342 |
| ENSP00000264668 | MTRR     | 0.5342 |
| ENSP00000450560 | MTHFD1   | 0.5342 |
| ENSP00000263187 | MSH4     | 0.5342 |
| ENSP00000253099 | MRPL4    | 0.5342 |
| ENSP00000260227 | MMP7     | 0.5342 |
| ENSP00000223215 | MEST     | 0.5342 |
| ENSP00000344223 | MBTPS1   | 0.5342 |
| ENSP00000303147 | MAT2A    | 0.5342 |
| ENSP00000337691 | MAPK15   | 0.5342 |
| ENSP00000345629 | MAP3K15  | 0.5342 |
| ENSP00000253055 | MAP3K10  | 0.5342 |
| ENSP00000432799 | MANF     | 0.5342 |
| ENSP00000413964 | LSM14A   | 0.5342 |
| ENSP00000373600 | LRRK1    | 0.5342 |
| ENSP00000422533 | LPHN3    | 0.5342 |
| ENSP00000342071 | LIPT1    | 0.5342 |
| ENSP00000280704 | LDHC     | 0.5342 |
| ENSP00000229319 | LDHB     | 0.5342 |
| ENSP00000432695 | KIAA1456 | 0.5342 |
| ENSP00000228495 | KCTD10   | 0.5342 |
| ENSP00000259021 | KAT7     | 0.5342 |
| ENSP00000340330 | KAT5     | 0.5342 |
| ENSP00000347244 | ITSN2    | 0.5342 |
| ENSP00000367316 | ITGA8    | 0.5342 |
| ENSP00000428220 | IRGM     | 0.5342 |
| ENSP00000258886 | IREB2    | 0.5342 |
| ENSP00000330825 | IFITM1   | 0.5342 |
| ENSP00000370223 | IDH3B    | 0.5342 |
| ENSP00000358211 | HSPA12A  | 0.5342 |
| ENSP00000352706 | HIBCH    | 0.5342 |
| ENSP00000356811 | HBS1L    | 0.5342 |
| ENSP00000222115 | HAS1     | 0.5342 |
| ENSP00000292377 | GPC2     | 0.5342 |
| ENSP00000248114 | GFER     | 0.5342 |
| ENSP00000302251 | GBX2     | 0.5342 |
| ENSP00000314806 | FOXR1    | 0.5342 |
| ENSP00000215530 | FGF22    | 0.5342 |
| ENSP00000377862 | FAT4     | 0.5342 |
| ENSP00000289081 | FANCC    | 0.5342 |
| ENSP00000323046 | EXOSC3   | 0.5342 |
| ENSP00000445077 | EIF2S3L  | 0.5342 |

|                 |            |        |
|-----------------|------------|--------|
| ENSP00000204961 | EFNB1      | 0.5342 |
| ENSP00000343690 | DPYSL3     | 0.5342 |
| ENSP00000309690 | DMXL1      | 0.5342 |
| ENSP00000405620 | DHX30      | 0.5342 |
| ENSP00000307305 | DDIT4      | 0.5342 |
| ENSP00000303887 | DCLK2      | 0.5342 |
| ENSP00000371802 | DAZ3       | 0.5342 |
| ENSP00000261623 | CYBA       | 0.5342 |
| ENSP00000295683 | CXCR1      | 0.5342 |
| ENSP00000352222 | CTPS2      | 0.5342 |
| ENSP00000305777 | CSNK1G1    | 0.5342 |
| ENSP00000445508 | CNOT4      | 0.5342 |
| ENSP00000394734 | CLK1       | 0.5342 |
| ENSP00000269141 | CDH2       | 0.5342 |
| ENSP00000275603 | CCT6A      | 0.5342 |
| ENSP00000344635 | CCNG1      | 0.5342 |
| ENSP00000250151 | CCL4       | 0.5342 |
| ENSP00000302234 | CCL11      | 0.5342 |
| ENSP00000309052 | CATSPER1   | 0.5342 |
| ENSP00000458075 | BOLA2B     | 0.5342 |
| ENSP00000264568 | BMPR1B     | 0.5342 |
| ENSP00000317469 | BBS1       | 0.5342 |
| ENSP00000262429 | ATP2C2     | 0.5342 |
| ENSP00000310561 | ARHGAP32   | 0.5342 |
| ENSP00000297991 | AQP3       | 0.5342 |
| ENSP00000366927 | ALDH1B1    | 0.5342 |
| ENSP00000362249 | AK1        | 0.5342 |
| ENSP00000252071 | ACTR3C     | 0.5342 |
| ENSP00000301956 | ACSM1      | 0.5342 |
| ENSP00000300441 | ACSF2      | 0.5342 |
| ENSP00000409612 | ACADM      | 0.5342 |
| ENSP00000389813 | ACAD10     | 0.5342 |
| ENSP00000472299 | AC013449.1 | 0.5342 |
| ENSP00000472933 | AC012493.2 | 0.5342 |
| ENSP00000323670 | ZBTB7A     | 0.5316 |
| ENSP00000348283 | WWP2       | 0.5316 |
| ENSP00000286574 | WIF1       | 0.5316 |
| ENSP00000233055 | WDFY1      | 0.5316 |
| ENSP00000401191 | WBSCR22    | 0.5316 |
| ENSP00000235521 | WARS2      | 0.5316 |
| ENSP00000238497 | VPS4B      | 0.5316 |
| ENSP00000281187 | VPS26B     | 0.5316 |
| ENSP00000378426 | VKORC1     | 0.5316 |
| ENSP00000316357 | USP9X      | 0.5316 |
| ENSP00000276201 | UPF3B      | 0.5316 |
| ENSP00000344259 | UBE2L3     | 0.5316 |
| ENSP00000303709 | UBE2E1     | 0.5316 |
| ENSP00000216185 | TXN2       | 0.5316 |
| ENSP00000357651 | TUBE1      | 0.5316 |
| ENSP00000298832 | TTL5       | 0.5316 |
| ENSP00000259750 | TTBK1      | 0.5316 |
| ENSP00000273482 | TRPC1      | 0.5316 |
| ENSP00000250018 | TPH1       | 0.5316 |

|                 |              |        |
|-----------------|--------------|--------|
| ENSP00000221132 | TNFRSF10A    | 0.5316 |
| ENSP00000262225 | TMED2        | 0.5316 |
| ENSP00000351905 | TGFBR2       | 0.5316 |
| ENSP00000374205 | TBR1         | 0.5316 |
| ENSP00000330343 | SUMO3        | 0.5316 |
| ENSP00000356540 | STX11        | 0.5316 |
| ENSP00000372689 | STAG1        | 0.5316 |
| ENSP00000265729 | SRI          | 0.5316 |
| ENSP00000374455 | SQSTM1       | 0.5316 |
| ENSP00000323300 | SPAG5        | 0.5316 |
| ENSP00000293894 | SOX8         | 0.5316 |
| ENSP00000330218 | SOX1         | 0.5316 |
| ENSP00000304429 | SNX7         | 0.5316 |
| ENSP00000295951 | SLMAP        | 0.5316 |
| ENSP00000337332 | SIRT6        | 0.5316 |
| ENSP00000348307 | SIRPA        | 0.5316 |
| ENSP00000376793 | SERPINA3     | 0.5316 |
| ENSP00000362335 | SAR1A        | 0.5316 |
| ENSP00000389182 | RPP30        | 0.5316 |
| ENSP00000328977 | RPH3AL       | 0.5316 |
| ENSP00000386655 | RP1-164F3.9  | 0.5316 |
| ENSP00000392995 | RNF103-CHMP3 | 0.5316 |
| ENSP00000363787 | RING1        | 0.5316 |
| ENSP00000025008 | RB1CC1       | 0.5316 |
| ENSP00000349428 | PTBP1        | 0.5316 |
| ENSP00000386541 | PSMD14       | 0.5316 |
| ENSP00000261479 | PSMA6        | 0.5316 |
| ENSP00000457299 | PSMA1        | 0.5316 |
| ENSP00000301522 | PRDX2        | 0.5316 |
| ENSP00000261461 | PPP2R5A      | 0.5316 |
| ENSP00000361918 | PPIE         | 0.5316 |
| ENSP00000450710 | PPAN         | 0.5316 |
| ENSP00000216180 | PNPLA3       | 0.5316 |
| ENSP00000249269 | PMPCB        | 0.5316 |
| ENSP00000343325 | PKN1         | 0.5316 |
| ENSP00000237596 | PKD2         | 0.5316 |
| ENSP00000266095 | PISD         | 0.5316 |
| ENSP00000362773 | PIN4         | 0.5316 |
| ENSP00000226382 | PHOX2B       | 0.5316 |
| ENSP00000232375 | PFKFB4       | 0.5316 |
| ENSP00000417214 | PARP15       | 0.5316 |
| ENSP00000345395 | PAPLN        | 0.5316 |
| ENSP00000302630 | ONECUT1      | 0.5316 |
| ENSP00000347626 | NUDCD3       | 0.5316 |
| ENSP00000159060 | NOX3         | 0.5316 |
| ENSP00000355133 | NOS1AP       | 0.5316 |
| ENSP00000366347 | NKX2-2       | 0.5316 |
| ENSP00000341737 | NECAP1       | 0.5316 |
| ENSP00000319977 | NDRG1        | 0.5316 |
| ENSP00000439182 | MYO1H        | 0.5316 |
| ENSP00000274643 | MYLK4        | 0.5316 |
| ENSP00000237500 | MYL12B       | 0.5316 |
| ENSP00000263063 | MTPAP        | 0.5316 |

|                 |         |        |
|-----------------|---------|--------|
| ENSP00000385045 | MTA3    | 0.5316 |
| ENSP00000308897 | MRPL11  | 0.5316 |
| ENSP00000380313 | MLST8   | 0.5316 |
| ENSP00000282892 | MED21   | 0.5316 |
| ENSP00000380053 | LEUTX   | 0.5316 |
| ENSP00000252242 | KRT5    | 0.5316 |
| ENSP00000424198 | KLHL2   | 0.5316 |
| ENSP00000248071 | KLF2    | 0.5316 |
| ENSP00000367828 | ITM2B   | 0.5316 |
| ENSP00000349252 | ITGAL   | 0.5316 |
| ENSP00000361418 | IPO13   | 0.5316 |
| ENSP00000238628 | IFT43   | 0.5316 |
| ENSP00000270139 | IFNAR1  | 0.5316 |
| ENSP00000430505 | IDO1    | 0.5316 |
| ENSP00000302961 | HSPA4   | 0.5316 |
| ENSP00000364802 | HSPA1A  | 0.5316 |
| ENSP00000302548 | HOXD4   | 0.5316 |
| ENSP00000222728 | HOXA6   | 0.5316 |
| ENSP00000292432 | HK3     | 0.5316 |
| ENSP00000358571 | HIPK1   | 0.5316 |
| ENSP00000296575 | HHIP    | 0.5316 |
| ENSP00000378624 | HERC4   | 0.5316 |
| ENSP00000264345 | HERC3   | 0.5316 |
| ENSP00000232854 | HEMK1   | 0.5316 |
| ENSP00000425634 | HARS    | 0.5316 |
| ENSP00000364398 | HABP4   | 0.5316 |
| ENSP00000348510 | GTF3C1  | 0.5316 |
| ENSP00000156109 | GPKOW   | 0.5316 |
| ENSP00000313869 | GORASP1 | 0.5316 |
| ENSP00000395772 | GNL3    | 0.5316 |
| ENSP00000363489 | GDF5    | 0.5316 |
| ENSP00000222214 | GCDH    | 0.5316 |
| ENSP00000348578 | G3BP1   | 0.5316 |
| ENSP00000371940 | FOXD4   | 0.5316 |
| ENSP00000355518 | FH      | 0.5316 |
| ENSP00000228837 | FGF6    | 0.5316 |
| ENSP00000283268 | FEZF2   | 0.5316 |
| ENSP00000393776 | FCHO2   | 0.5316 |
| ENSP00000428205 | FBXO32  | 0.5316 |
| ENSP00000315476 | EXOSC4  | 0.5316 |
| ENSP00000337451 | EPHA3   | 0.5316 |
| ENSP00000435619 | EID3    | 0.5316 |
| ENSP00000380308 | DYNC1I2 | 0.5316 |
| ENSP00000276420 | DOK2    | 0.5316 |
| ENSP00000368523 | DNAJC15 | 0.5316 |
| ENSP00000369127 | DNAJA1  | 0.5316 |
| ENSP00000382133 | DNA2    | 0.5316 |
| ENSP00000398495 | DIABLO  | 0.5316 |
| ENSP00000268482 | DHX38   | 0.5316 |
| ENSP00000310723 | DDX23   | 0.5316 |
| ENSP00000363840 | COL11A2 | 0.5316 |
| ENSP00000305449 | CNNM3   | 0.5316 |
| ENSP00000303585 | CLIP1   | 0.5316 |

|                 |               |        |
|-----------------|---------------|--------|
| ENSP00000392028 | CHD7          | 0.5316 |
| ENSP00000338673 | CDK10         | 0.5316 |
| ENSP00000364212 | CDA           | 0.5316 |
| ENSP00000264246 | CD80          | 0.5316 |
| ENSP00000359866 | BMP5          | 0.5316 |
| ENSP00000393596 | BIRC6         | 0.5316 |
| ENSP00000352219 | BCS1L         | 0.5316 |
| ENSP00000309103 | BAD           | 0.5316 |
| ENSP00000276390 | ATP6V1B2      | 0.5316 |
| ENSP00000300688 | ATP5L         | 0.5316 |
| ENSP00000324172 | ATP2B2        | 0.5316 |
| ENSP00000261879 | APH1B         | 0.5316 |
| ENSP00000257497 | ANXA1         | 0.5316 |
| ENSP00000324074 | ANP32E        | 0.5316 |
| ENSP00000377083 | ALDH1L1       | 0.5316 |
| ENSP00000285930 | AKR1B1        | 0.5316 |
| ENSP00000231420 | AGXT2         | 0.5316 |
| ENSP00000333664 | ACAA1         | 0.5316 |
| ENSP00000225941 | ABI3          | 0.5316 |
| ENSP00000374467 | ABCC8         | 0.5316 |
| ENSP00000265723 | ABCB4         | 0.5316 |
| ENSP00000338160 | FKBP5         | 0.5316 |
| ENSP00000227322 | ZNF259        | 0.5289 |
| ENSP00000280193 | VEGFC         | 0.5289 |
| ENSP00000340596 | UBE3B         | 0.5289 |
| ENSP00000340305 | UBE2V1        | 0.5289 |
| ENSP00000349722 | UBE2D3        | 0.5289 |
| ENSP00000264029 | TREH          | 0.5289 |
| ENSP00000238788 | TMEM214       | 0.5289 |
| ENSP00000354932 | TLR1          | 0.5289 |
| ENSP00000380969 | THOC5         | 0.5289 |
| ENSP00000265097 | THOC3         | 0.5289 |
| ENSP00000307260 | TBL2          | 0.5289 |
| ENSP00000346139 | TBC1D20       | 0.5289 |
| ENSP00000347792 | SYNJ2         | 0.5289 |
| ENSP00000376178 | STX2          | 0.5289 |
| ENSP00000215095 | STX1B         | 0.5289 |
| ENSP00000282908 | STK32B        | 0.5289 |
| ENSP00000322977 | SSBP2         | 0.5289 |
| ENSP00000309945 | SPNS1         | 0.5289 |
| ENSP00000371542 | SPATA13       | 0.5289 |
| ENSP00000430333 | SLIT3         | 0.5289 |
| ENSP00000222248 | SLC5A5        | 0.5289 |
| ENSP00000371535 | SEPSECS       | 0.5289 |
| ENSP00000396320 | SCN4A         | 0.5289 |
| ENSP00000310448 | SART1         | 0.5289 |
| ENSP00000352608 | RYR1          | 0.5289 |
| ENSP00000419494 | RYBP          | 0.5289 |
| ENSP00000345957 | RPS21         | 0.5289 |
| ENSP00000346022 | RPL9          | 0.5289 |
| ENSP00000294189 | RPL29         | 0.5289 |
| ENSP00000466829 | RP11-318A15.7 | 0.5289 |
| ENSP00000342755 | RNF41         | 0.5289 |

|                 |               |        |
|-----------------|---------------|--------|
| ENSP00000296271 | RHO           | 0.5289 |
| ENSP00000269051 | RHBDL3        | 0.5289 |
| ENSP00000289248 | RHBDL2        | 0.5289 |
| ENSP00000262316 | RHBDF1        | 0.5289 |
| ENSP00000386810 | RGPD4         | 0.5289 |
| ENSP00000253363 | RBM39         | 0.5289 |
| ENSP00000366829 | RBM10         | 0.5289 |
| ENSP00000393262 | RBFOX3        | 0.5289 |
| ENSP00000259569 | RANBP6        | 0.5289 |
| ENSP00000351284 | RAD52         | 0.5289 |
| ENSP00000350708 | RAD23B        | 0.5289 |
| ENSP00000378313 | RAB3IL1       | 0.5289 |
| ENSP00000377047 | PTPRZ1        | 0.5289 |
| ENSP00000400010 | PTPRJ         | 0.5289 |
| ENSP00000418112 | PTPRG         | 0.5289 |
| ENSP00000303424 | PTGDR         | 0.5289 |
| ENSP00000351314 | PSMB10        | 0.5289 |
| ENSP00000262848 | PRKX          | 0.5289 |
| ENSP00000345064 | PRICKLE1      | 0.5289 |
| ENSP00000234310 | PPP3R1        | 0.5289 |
| ENSP00000362296 | POU3F4        | 0.5289 |
| ENSP00000301788 | POLR2G        | 0.5289 |
| ENSP00000216259 | PMM1          | 0.5289 |
| ENSP00000366977 | PLEKHG5       | 0.5289 |
| ENSP00000220809 | PLAT          | 0.5289 |
| ENSP00000244137 | PEPD          | 0.5289 |
| ENSP00000365388 | PDSS1         | 0.5289 |
| ENSP00000360327 | PARS2         | 0.5289 |
| ENSP00000354681 | OPA1          | 0.5289 |
| ENSP00000388001 | OAS1          | 0.5289 |
| ENSP00000285968 | NUP205        | 0.5289 |
| ENSP00000358019 | NSMCE4A       | 0.5289 |
| ENSP00000355944 | NSL1          | 0.5289 |
| ENSP00000348460 | NPAS3         | 0.5289 |
| ENSP00000370215 | NOXRED1       | 0.5289 |
| ENSP00000013034 | NME1          | 0.5289 |
| ENSP00000268459 | NKD1          | 0.5289 |
| ENSP00000431482 | NEDD8-MDP1    | 0.5289 |
| ENSP00000432614 | NDUFC2-KCTD14 | 0.5289 |
| ENSP00000299166 | NDUFB8        | 0.5289 |
| ENSP00000281038 | NARS2         | 0.5289 |
| ENSP00000301972 | MYRIP         | 0.5289 |
| ENSP00000081029 | MRPS35        | 0.5289 |
| ENSP00000372093 | MRPL36        | 0.5289 |
| ENSP00000315017 | MRPL1         | 0.5289 |
| ENSP00000264605 | MLPH          | 0.5289 |
| ENSP00000347427 | MINK1         | 0.5289 |
| ENSP00000215957 | MICALL1       | 0.5289 |
| ENSP00000456533 | MFRP          | 0.5289 |
| ENSP00000342392 | MESP2         | 0.5289 |
| ENSP00000363193 | MED12         | 0.5289 |
| ENSP00000401980 | MAVS          | 0.5289 |
| ENSP00000226578 | MANBA         | 0.5289 |

|                 |          |        |
|-----------------|----------|--------|
| ENSP00000267978 | MAN2C1   | 0.5289 |
| ENSP00000319240 | MAGOHB   | 0.5289 |
| ENSP00000298910 | LRRK2    | 0.5289 |
| ENSP00000377086 | LONRF2   | 0.5289 |
| ENSP00000261434 | LIAS     | 0.5289 |
| ENSP00000263726 | LHX4     | 0.5289 |
| ENSP00000262776 | LGALS3BP | 0.5289 |
| ENSP00000253339 | LATS1    | 0.5289 |
| ENSP00000408411 | LAMP2    | 0.5289 |
| ENSP00000318016 | KIAA0196 | 0.5289 |
| ENSP00000432786 | KDM2A    | 0.5289 |
| ENSP00000366682 | IRG1     | 0.5289 |
| ENSP00000297185 | HSPA9    | 0.5289 |
| ENSP00000348170 | HP       | 0.5289 |
| ENSP00000365402 | HLA-C    | 0.5289 |
| ENSP00000399168 | HLA-B    | 0.5289 |
| ENSP00000264346 | HERC6    | 0.5289 |
| ENSP00000229330 | HCFC2    | 0.5289 |
| ENSP00000306991 | HAS2     | 0.5289 |
| ENSP00000373477 | GPX3     | 0.5289 |
| ENSP00000245206 | GOT2     | 0.5289 |
| ENSP00000222286 | GAPDHS   | 0.5289 |
| ENSP00000340466 | GANAB    | 0.5289 |
| ENSP00000296839 | FOXQ1    | 0.5289 |
| ENSP00000366637 | FOXD4L5  | 0.5289 |
| ENSP00000297904 | FIGF     | 0.5289 |
| ENSP00000304592 | FASN     | 0.5289 |
| ENSP00000221233 | EXOSC5   | 0.5289 |
| ENSP00000358309 | EPHA7    | 0.5289 |
| ENSP00000229277 | ENO2     | 0.5289 |
| ENSP00000338020 | EIF4G1   | 0.5289 |
| ENSP00000273783 | EIF2B5   | 0.5289 |
| ENSP00000398124 | E2F5     | 0.5289 |
| ENSP00000404079 | DNAJB5   | 0.5289 |
| ENSP00000312697 | DMAP1    | 0.5289 |
| ENSP00000377344 | DDX60    | 0.5289 |
| ENSP00000250863 | DAZL     | 0.5289 |
| ENSP00000287490 | COX6A2   | 0.5289 |
| ENSP00000285896 | CNOT8    | 0.5289 |
| ENSP00000272133 | CNIH3    | 0.5289 |
| ENSP00000271636 | CGN      | 0.5289 |
| ENSP00000215980 | CENPM    | 0.5289 |
| ENSP00000380718 | CDYL     | 0.5289 |
| ENSP00000464036 | CDK11B   | 0.5289 |
| ENSP00000353656 | CDH4     | 0.5289 |
| ENSP00000363836 | CCNY     | 0.5289 |
| ENSP00000344549 | CARD14   | 0.5289 |
| ENSP00000296452 | BSN      | 0.5289 |
| ENSP00000314792 | BOLL     | 0.5289 |
| ENSP00000252677 | BMP15    | 0.5289 |
| ENSP00000263182 | BBOX1    | 0.5289 |
| ENSP00000295598 | ATP1A1   | 0.5289 |
| ENSP00000175506 | ASNS     | 0.5289 |

|                 |              |        |
|-----------------|--------------|--------|
| ENSP00000347602 | ARID4A       | 0.5289 |
| ENSP00000236850 | APOA1        | 0.5289 |
| ENSP00000233607 | APC2         | 0.5289 |
| ENSP00000261558 | AP5M1        | 0.5289 |
| ENSP00000297183 | ANKHD1       | 0.5289 |
| ENSP00000261819 | ANAPC5       | 0.5289 |
| ENSP00000262374 | ALG1         | 0.5289 |
| ENSP00000302620 | AGXT         | 0.5289 |
| ENSP00000312126 | ADCY4        | 0.5289 |
| ENSP00000316924 | ACSS1        | 0.5289 |
| ENSP00000293217 | ACOX1        | 0.5289 |
| ENSP00000341044 | ACACB        | 0.5289 |
| ENSP00000222388 | ABCF2        | 0.5289 |
| ENSP00000380795 | VPS29        | 0.5289 |
| ENSP00000402084 | WEE1         | 0.5263 |
| ENSP00000363308 | WDR31        | 0.5263 |
| ENSP00000428845 | VDAC3        | 0.5263 |
| ENSP00000215794 | USP18        | 0.5263 |
| ENSP00000261601 | USP14        | 0.5263 |
| ENSP00000319501 | UGDH         | 0.5263 |
| ENSP00000313454 | UBA6         | 0.5263 |
| ENSP00000287078 | TYSND1       | 0.5263 |
| ENSP00000318697 | TUBB6        | 0.5263 |
| ENSP00000381003 | TTC28        | 0.5263 |
| ENSP00000360552 | TSHZ2        | 0.5263 |
| ENSP00000260810 | TOPBP1       | 0.5263 |
| ENSP00000413697 | TOM1         | 0.5263 |
| ENSP00000276431 | TNFRSF10B    | 0.5263 |
| ENSP00000266085 | TIMP3        | 0.5263 |
| ENSP00000218388 | TIMP1        | 0.5263 |
| ENSP00000438455 | TIMM8B       | 0.5263 |
| ENSP00000245838 | THOC2        | 0.5263 |
| ENSP00000346691 | TBC1D3       | 0.5263 |
| ENSP00000346997 | SUV39H2      | 0.5263 |
| ENSP00000344742 | STAMPB       | 0.5263 |
| ENSP00000360371 | SSBP3        | 0.5263 |
| ENSP00000382518 | SRL          | 0.5263 |
| ENSP00000263672 | SPCS2        | 0.5263 |
| ENSP00000376024 | SNX9         | 0.5263 |
| ENSP00000254193 | SNRPA1       | 0.5263 |
| ENSP00000304360 | SMYD4        | 0.5263 |
| ENSP00000266058 | SLIT1        | 0.5263 |
| ENSP00000345580 | SLC25A10     | 0.5263 |
| ENSP00000368552 | SIRT5        | 0.5263 |
| ENSP00000293441 | SHANK1       | 0.5263 |
| ENSP00000302913 | SH3D19       | 0.5263 |
| ENSP00000321221 | SH2B1        | 0.5263 |
| ENSP00000301037 | SGK494       | 0.5263 |
| ENSP00000263686 | SELP         | 0.5263 |
| ENSP00000254351 | SDC1         | 0.5263 |
| ENSP00000360938 | SARDH        | 0.5263 |
| ENSP00000196551 | RPS5         | 0.5263 |
| ENSP00000450730 | RP11-934B9.3 | 0.5263 |



|                 |          |        |
|-----------------|----------|--------|
| ENSP00000268125 | RLBP1    | 0.5263 |
| ENSP00000369318 | RHOBTB3  | 0.5263 |
| ENSP00000343054 | RBM5     | 0.5263 |
| ENSP00000360286 | RAE1     | 0.5263 |
| ENSP00000216962 | PYGB     | 0.5263 |
| ENSP00000227474 | PUS3     | 0.5263 |
| ENSP00000283228 | PTPRR    | 0.5263 |
| ENSP00000298852 | PSMC3    | 0.5263 |
| ENSP00000261303 | PSMC1    | 0.5263 |
| ENSP00000261454 | PROX1    | 0.5263 |
| ENSP00000333551 | PROSC    | 0.5263 |
| ENSP00000343924 | PRELP    | 0.5263 |
| ENSP00000265462 | PRDX5    | 0.5263 |
| ENSP00000368646 | PRDX4    | 0.5263 |
| ENSP00000329867 | PPME1    | 0.5263 |
| ENSP00000282412 | PPM1B    | 0.5263 |
| ENSP00000292614 | POLR2J   | 0.5263 |
| ENSP00000361465 | POLR1C   | 0.5263 |
| ENSP00000360782 | PMPCA    | 0.5263 |
| ENSP00000339328 | PLAUR    | 0.5263 |
| ENSP00000298282 | PKNOX2   | 0.5263 |
| ENSP00000371393 | PGM2     | 0.5263 |
| ENSP00000363734 | PFDN6    | 0.5263 |
| ENSP00000272227 | PDIA6    | 0.5263 |
| ENSP00000227868 | PDHX     | 0.5263 |
| ENSP00000264933 | PDCD6    | 0.5263 |
| ENSP00000358812 | PDCD11   | 0.5263 |
| ENSP00000193322 | OSTM1    | 0.5263 |
| ENSP00000224950 | OBFC1    | 0.5263 |
| ENSP00000342262 | NUP43    | 0.5263 |
| ENSP00000300291 | NUDT21   | 0.5263 |
| ENSP00000235628 | NT5C1A   | 0.5263 |
| ENSP00000354929 | NOTCH2NL | 0.5263 |
| ENSP00000301457 | NDUFA7   | 0.5263 |
| ENSP00000423673 | NDUFA13  | 0.5263 |
| ENSP00000401508 | NAPRT1   | 0.5263 |
| ENSP00000258787 | MYO1G    | 0.5263 |
| ENSP00000217652 | MYL12A   | 0.5263 |
| ENSP00000262101 | MSR1     | 0.5263 |
| ENSP00000337907 | MPP7     | 0.5263 |
| ENSP00000387278 | MPP4     | 0.5263 |
| ENSP00000269095 | MPP2     | 0.5263 |
| ENSP00000452854 | MEIS3    | 0.5263 |
| ENSP00000350639 | MAPKAPK3 | 0.5263 |
| ENSP00000265960 | MAPKAP1  | 0.5263 |
| ENSP00000375986 | MAP3K4   | 0.5263 |
| ENSP00000285928 | LRGUK    | 0.5263 |
| ENSP00000309757 | LPL      | 0.5263 |
| ENSP00000372035 | LATS2    | 0.5263 |
| ENSP00000258341 | LAMC1    | 0.5263 |
| ENSP00000329471 | KDELRL1  | 0.5263 |
| ENSP00000355402 | ISLR2    | 0.5263 |
| ENSP00000261574 | IPO5     | 0.5263 |

|                 |                |        |
|-----------------|----------------|--------|
| ENSP00000329553 | IMMP2L         | 0.5263 |
| ENSP00000264497 | IL21           | 0.5263 |
| ENSP00000403103 | IL12RB1        | 0.5263 |
| ENSP00000457706 | HSPB2-C11orf52 | 0.5263 |
| ENSP00000364412 | HSD17B3        | 0.5263 |
| ENSP00000216027 | HSCB           | 0.5263 |
| ENSP00000381237 | HM13           | 0.5263 |
| ENSP00000332194 | HIST2H2AC      | 0.5263 |
| ENSP00000413520 | HID1           | 0.5263 |
| ENSP00000317904 | GYS1           | 0.5263 |
| ENSP00000354003 | GYP A          | 0.5263 |
| ENSP00000221130 | GSR            | 0.5263 |
| ENSP00000374265 | GPX2           | 0.5263 |
| ENSP00000282541 | GPD1L          | 0.5263 |
| ENSP00000234160 | GORASP2        | 0.5263 |
| ENSP00000315925 | GMPPA          | 0.5263 |
| ENSP00000385721 | GGT2           | 0.5263 |
| ENSP00000226796 | GAR1           | 0.5263 |
| ENSP00000291670 | FTCD           | 0.5263 |
| ENSP00000295113 | FRZB           | 0.5263 |
| ENSP00000326272 | FOXL1          | 0.5263 |
| ENSP00000259806 | FOXF2          | 0.5263 |
| ENSP00000365301 | FGF14          | 0.5263 |
| ENSP00000366135 | EXOSC10        | 0.5263 |
| ENSP00000323714 | EIF4E1B        | 0.5263 |
| ENSP00000309953 | EFEMP2         | 0.5263 |
| ENSP00000380054 | EAF1           | 0.5263 |
| ENSP00000354111 | DNAJC5         | 0.5263 |
| ENSP00000455744 | DKFZP686D09174 | 0.5263 |
| ENSP00000336741 | DHX15          | 0.5263 |
| ENSP00000265022 | DGKG           | 0.5263 |
| ENSP00000263209 | DGCR8          | 0.5263 |
| ENSP00000259512 | DERL1          | 0.5263 |
| ENSP00000292782 | DCUN1D1        | 0.5263 |
| ENSP00000394484 | DCLK3          | 0.5263 |
| ENSP00000358903 | CYP17A1        | 0.5263 |
| ENSP00000361562 | CTSA           | 0.5263 |
| ENSP00000359976 | CTH            | 0.5263 |
| ENSP00000300527 | COL6A2         | 0.5263 |
| ENSP00000303153 | COL22A1        | 0.5263 |
| ENSP00000341882 | CNTN6          | 0.5263 |
| ENSP00000229329 | CMAS           | 0.5263 |
| ENSP00000284049 | CHD1           | 0.5263 |
| ENSP00000370297 | CER1           | 0.5263 |
| ENSP00000336868 | CENPA          | 0.5263 |
| ENSP00000419879 | CDS2           | 0.5263 |
| ENSP00000355237 | CDC42BPB       | 0.5263 |
| ENSP00000363708 | BMPR2          | 0.5263 |
| ENSP00000355231 | BECN1          | 0.5263 |
| ENSP00000368414 | BCAP29         | 0.5263 |
| ENSP00000370718 | ASMTL          | 0.5263 |
| ENSP00000328789 | AP1S2          | 0.5263 |
| ENSP00000265132 | AMBP           | 0.5263 |

|                 |              |        |
|-----------------|--------------|--------|
| ENSP00000336927 | ALDOA        | 0.5263 |
| ENSP00000346827 | ALDH9A1      | 0.5263 |
| ENSP00000371230 | AK3          | 0.5263 |
| ENSP00000362306 | AGO4         | 0.5263 |
| ENSP00000342952 | ADCY2        | 0.5263 |
| ENSP00000309477 | ACO1         | 0.5263 |
| ENSP00000222800 | ABHD11       | 0.5263 |
| ENSP00000411471 | ABCF3        | 0.5263 |
| ENSP00000434236 | SUGT1P3      | 0.5263 |
| ENSP00000261980 | VSX2         | 0.5237 |
| ENSP00000379602 | VAMP1        | 0.5237 |
| ENSP00000328939 | UTY          | 0.5237 |
| ENSP00000400312 | ULK3         | 0.5237 |
| ENSP00000365105 | TLL9         | 0.5237 |
| ENSP00000433757 | TTC12        | 0.5237 |
| ENSP00000261740 | TRPV4        | 0.5237 |
| ENSP00000362026 | TRMT2B       | 0.5237 |
| ENSP00000261464 | TRAF5        | 0.5237 |
| ENSP00000356966 | TOMM40L      | 0.5237 |
| ENSP00000360689 | TNKS2        | 0.5237 |
| ENSP00000297350 | TNFRSF11B    | 0.5237 |
| ENSP00000420588 | TFAM         | 0.5237 |
| ENSP00000309913 | TBX5         | 0.5237 |
| ENSP0000040877  | TARBP1       | 0.5237 |
| ENSP00000296946 | T            | 0.5237 |
| ENSP00000394700 | SYT16        | 0.5237 |
| ENSP00000392270 | STRAP        | 0.5237 |
| ENSP00000267540 | STON2        | 0.5237 |
| ENSP00000348886 | STOML2       | 0.5237 |
| ENSP00000410452 | STMN1        | 0.5237 |
| ENSP00000301740 | SRRM2        | 0.5237 |
| ENSP00000260324 | SQRDL        | 0.5237 |
| ENSP00000305494 | SPATA5L1     | 0.5237 |
| ENSP00000215829 | SNRPD3       | 0.5237 |
| ENSP00000354720 | SMC3         | 0.5237 |
| ENSP00000306190 | SLAMF1       | 0.5237 |
| ENSP00000262018 | SGCA         | 0.5237 |
| ENSP00000391311 | SEPT5        | 0.5237 |
| ENSP00000310521 | SEC22A       | 0.5237 |
| ENSP00000355499 | SDCCAG8      | 0.5237 |
| ENSP00000344468 | SDC3         | 0.5237 |
| ENSP00000317224 | SAMD4B       | 0.5237 |
| ENSP00000251810 | RRM2B        | 0.5237 |
| ENSP00000298317 | RPUSD4       | 0.5237 |
| ENSP00000323288 | RPUSD2       | 0.5237 |
| ENSP00000339095 | RPS7         | 0.5237 |
| ENSP00000339795 | RPL7         | 0.5237 |
| ENSP00000274242 | RPL37        | 0.5237 |
| ENSP00000391266 | RP1-241P17.4 | 0.5237 |
| ENSP00000315212 | RNF4         | 0.5237 |
| ENSP00000428417 | RIMS1        | 0.5237 |
| ENSP00000333194 | RGS19        | 0.5237 |
| ENSP00000368295 | REXO1L1      | 0.5237 |

|                 |                |        |
|-----------------|----------------|--------|
| ENSP00000309117 | RBFOX1         | 0.5237 |
| ENSP00000358549 | RARS2          | 0.5237 |
| ENSP00000430128 | RALYL          | 0.5237 |
| ENSP00000297338 | RAD21          | 0.5237 |
| ENSP00000355094 | QKI            | 0.5237 |
| ENSP00000369756 | PTPRA          | 0.5237 |
| ENSP00000248594 | PTPN12         | 0.5237 |
| ENSP00000386621 | PTGES3L-AARSD1 | 0.5237 |
| ENSP00000219313 | PSMD7          | 0.5237 |
| ENSP00000223321 | PSMA2          | 0.5237 |
| ENSP00000234347 | PRTN3          | 0.5237 |
| ENSP00000287878 | PRKAG2         | 0.5237 |
| ENSP00000295902 | PRICKLE2       | 0.5237 |
| ENSP00000335614 | PPFIA3         | 0.5237 |
| ENSP00000377385 | PPAN-P2RY11    | 0.5237 |
| ENSP00000343885 | PPA2           | 0.5237 |
| ENSP00000406046 | POLD1          | 0.5237 |
| ENSP00000273077 | PNKD           | 0.5237 |
| ENSP00000406490 | PMS1           | 0.5237 |
| ENSP00000420132 | PLSCR2         | 0.5237 |
| ENSP00000223127 | PLOD3          | 0.5237 |
| ENSP00000262300 | PKMYT1         | 0.5237 |
| ENSP00000264380 | PIKFYVE        | 0.5237 |
| ENSP00000329097 | PHF6           | 0.5237 |
| ENSP00000368682 | PHEX           | 0.5237 |
| ENSP00000425809 | PGM3           | 0.5237 |
| ENSP00000356989 | PFDN2          | 0.5237 |
| ENSP00000301396 | PELP1          | 0.5237 |
| ENSP00000303427 | PDS5A          | 0.5237 |
| ENSP00000384515 | PARVB          | 0.5237 |
| ENSP00000360672 | PARD6B         | 0.5237 |
| ENSP00000297431 | ORC5           | 0.5237 |
| ENSP00000394624 | OPRM1          | 0.5237 |
| ENSP00000369136 | NWD1           | 0.5237 |
| ENSP00000367721 | NUP160         | 0.5237 |
| ENSP00000258960 | NMT1           | 0.5237 |
| ENSP00000299872 | NGFRAP1        | 0.5237 |
| ENSP00000360231 | NFIA           | 0.5237 |
| ENSP00000386461 | MYO7B          | 0.5237 |
| ENSP00000415183 | MUC2           | 0.5237 |
| ENSP00000257552 | MSI1           | 0.5237 |
| ENSP00000333837 | MRPL12         | 0.5237 |
| ENSP00000250156 | MRM1           | 0.5237 |
| ENSP00000222644 | MPP6           | 0.5237 |
| ENSP00000381425 | MPP3           | 0.5237 |
| ENSP00000308351 | MLKL           | 0.5237 |
| ENSP00000246062 | MKKS           | 0.5237 |
| ENSP00000263881 | MAP4K3         | 0.5237 |
| ENSP00000260665 | LRPPRC         | 0.5237 |
| ENSP00000264162 | LCT            | 0.5237 |
| ENSP00000254043 | KRT15          | 0.5237 |
| ENSP00000388241 | KIF26A         | 0.5237 |
| ENSP00000371587 | KCNIP4         | 0.5237 |

|                 |         |        |
|-----------------|---------|--------|
| ENSP00000335106 | KATNA1  | 0.5237 |
| ENSP00000452120 | ITGA7   | 0.5237 |
| ENSP00000364805 | HSPA1L  | 0.5237 |
| ENSP00000308944 | HLTF    | 0.5237 |
| ENSP00000295488 | HELQ    | 0.5237 |
| ENSP00000423563 | H2AFY   | 0.5237 |
| ENSP00000276414 | GNRH1   | 0.5237 |
| ENSP00000312999 | GNAI2   | 0.5237 |
| ENSP00000300648 | GCN1L1  | 0.5237 |
| ENSP00000387662 | GCG     | 0.5237 |
| ENSP00000225614 | GALK1   | 0.5237 |
| ENSP00000363621 | GALE    | 0.5237 |
| ENSP00000354607 | FZD5    | 0.5237 |
| ENSP00000427329 | FOXR2   | 0.5237 |
| ENSP00000302756 | FOXD4L1 | 0.5237 |
| ENSP00000336829 | FGG     | 0.5237 |
| ENSP00000287647 | FANCD2  | 0.5237 |
| ENSP00000166244 | EPHA8   | 0.5237 |
| ENSP00000337168 | EPB41L1 | 0.5237 |
| ENSP00000429986 | ENY2    | 0.5237 |
| ENSP00000345555 | ENO4    | 0.5237 |
| ENSP00000220849 | EIF3E   | 0.5237 |
| ENSP00000363680 | EDA     | 0.5237 |
| ENSP00000311977 | DUS3L   | 0.5237 |
| ENSP00000237449 | DNAH6   | 0.5237 |
| ENSP00000416583 | DERA    | 0.5237 |
| ENSP00000301264 | DAPK3   | 0.5237 |
| ENSP00000297044 | CYTH3   | 0.5237 |
| ENSP00000308928 | CYLD    | 0.5237 |
| ENSP00000324549 | CYFIP1  | 0.5237 |
| ENSP00000286758 | CXCL13  | 0.5237 |
| ENSP00000361699 | CTPS1   | 0.5237 |
| ENSP00000217244 | CSNK2A1 | 0.5237 |
| ENSP00000299529 | CRABP1  | 0.5237 |
| ENSP00000332371 | COL7A1  | 0.5237 |
| ENSP00000419974 | CLASP2  | 0.5237 |
| ENSP00000223500 | CHMP5   | 0.5237 |
| ENSP00000298159 | CFL2    | 0.5237 |
| ENSP00000362018 | CENPI   | 0.5237 |
| ENSP00000372319 | CDY2B   | 0.5237 |
| ENSP00000302968 | CDY1    | 0.5237 |
| ENSP00000384442 | CDK11A  | 0.5237 |
| ENSP00000319166 | CDH7    | 0.5237 |
| ENSP00000368450 | CD83    | 0.5237 |
| ENSP00000300105 | CACNG2  | 0.5237 |
| ENSP00000318128 | BLOC1S4 | 0.5237 |
| ENSP00000326391 | BHLHA15 | 0.5237 |
| ENSP00000343313 | ATG5    | 0.5237 |
| ENSP00000310071 | ANAPC10 | 0.5237 |
| ENSP00000430236 | ALG11   | 0.5237 |
| ENSP00000307634 | AGAP1   | 0.5237 |
| ENSP00000289228 | ACTR1B  | 0.5237 |
| ENSP00000160382 | ACTL6B  | 0.5237 |

|                 |              |        |
|-----------------|--------------|--------|
| ENSP00000313603 | ABCF1        | 0.5237 |
| ENSP00000253699 | ZFYVE20      | 0.5211 |
| ENSP00000343392 | XRCC3        | 0.5211 |
| ENSP00000262887 | XRCC1        | 0.5211 |
| ENSP00000319474 | WSB2         | 0.5211 |
| ENSP00000346829 | WLS          | 0.5211 |
| ENSP00000307491 | WDR48        | 0.5211 |
| ENSP00000298767 | WAPAL        | 0.5211 |
| ENSP00000345656 | VAPA         | 0.5211 |
| ENSP00000381577 | USP34        | 0.5211 |
| ENSP00000324343 | UPB1         | 0.5211 |
| ENSP00000237014 | TTR          | 0.5211 |
| ENSP00000347733 | TRRAP        | 0.5211 |
| ENSP00000317891 | TNIP1        | 0.5211 |
| ENSP00000301634 | TK1          | 0.5211 |
| ENSP00000361993 | TIMM8A       | 0.5211 |
| ENSP00000258975 | TACO1        | 0.5211 |
| ENSP00000366395 | SYVN1        | 0.5211 |
| ENSP00000376472 | STT3A        | 0.5211 |
| ENSP00000325748 | STK25        | 0.5211 |
| ENSP00000356591 | SOAT1        | 0.5211 |
| ENSP00000378414 | SMARCD1      | 0.5211 |
| ENSP00000358770 | SLK          | 0.5211 |
| ENSP00000422591 | SLIT2        | 0.5211 |
| ENSP00000408005 | SLC9A3R2     | 0.5211 |
| ENSP00000263980 | SLC9A1       | 0.5211 |
| ENSP00000233202 | SLC11A1      | 0.5211 |
| ENSP00000304502 | SIX2         | 0.5211 |
| ENSP00000370395 | SGTB         | 0.5211 |
| ENSP00000366604 | SF1          | 0.5211 |
| ENSP00000265175 | SEC24B       | 0.5211 |
| ENSP00000283256 | SCN2A        | 0.5211 |
| ENSP00000385432 | SAR1B        | 0.5211 |
| ENSP00000373713 | SACM1L       | 0.5211 |
| ENSP00000291700 | S100B        | 0.5211 |
| ENSP00000318646 | RPS15A       | 0.5211 |
| ENSP00000404375 | RPL36A       | 0.5211 |
| ENSP00000447000 | RP11-762I7.5 | 0.5211 |
| ENSP00000307971 | RFNG         | 0.5211 |
| ENSP00000216225 | RBX1         | 0.5211 |
| ENSP00000413035 | RBFOX2       | 0.5211 |
| ENSP00000011619 | RANBP9       | 0.5211 |
| ENSP00000467024 | RAD23A       | 0.5211 |
| ENSP00000317473 | RABGGTB      | 0.5211 |
| ENSP00000282091 | PTH          | 0.5211 |
| ENSP00000261712 | PSMD11       | 0.5211 |
| ENSP00000386458 | PRPF40A      | 0.5211 |
| ENSP00000359095 | PRMT6        | 0.5211 |
| ENSP00000350491 | PRIM1        | 0.5211 |
| ENSP00000216367 | POLE2        | 0.5211 |
| ENSP00000316021 | PLSCR3       | 0.5211 |
| ENSP00000386733 | PLEKHG2      | 0.5211 |
| ENSP00000294964 | PKDCC        | 0.5211 |

|                 |          |        |
|-----------------|----------|--------|
| ENSP00000265970 | PIK3C2A  | 0.5211 |
| ENSP00000226319 | PHF17    | 0.5211 |
| ENSP00000257118 | PHC2     | 0.5211 |
| ENSP00000300408 | PHB      | 0.5211 |
| ENSP00000262764 | PGS1     | 0.5211 |
| ENSP00000239940 | PFN2     | 0.5211 |
| ENSP00000310661 | PDE7B    | 0.5211 |
| ENSP00000266395 | PDE6H    | 0.5211 |
| ENSP00000442050 | PCYT2    | 0.5211 |
| ENSP00000406157 | PAPSS2   | 0.5211 |
| ENSP00000265174 | PAPSS1   | 0.5211 |
| ENSP00000347379 | OCLN     | 0.5211 |
| ENSP00000352839 | NPSR1    | 0.5211 |
| ENSP00000370589 | NOP56    | 0.5211 |
| ENSP00000340925 | NADK     | 0.5211 |
| ENSP00000260950 | MSTN     | 0.5211 |
| ENSP00000314441 | METTL1   | 0.5211 |
| ENSP00000308546 | MEPCE    | 0.5211 |
| ENSP00000348982 | MEGF6    | 0.5211 |
| ENSP00000343657 | MCCC2    | 0.5211 |
| ENSP00000355884 | MARK1    | 0.5211 |
| ENSP00000250894 | MAPK8IP3 | 0.5211 |
| ENSP00000298288 | LRR1     | 0.5211 |
| ENSP00000421922 | LRPAP1   | 0.5211 |
| ENSP00000231368 | LNPEP    | 0.5211 |
| ENSP00000252244 | KRT1     | 0.5211 |
| ENSP00000361298 | KIF2C    | 0.5211 |
| ENSP00000296181 | ITGB5    | 0.5211 |
| ENSP00000378295 | INCENP   | 0.5211 |
| ENSP00000296266 | IFT122   | 0.5211 |
| ENSP00000305919 | HTRA4    | 0.5211 |
| ENSP00000366898 | HIF3A    | 0.5211 |
| ENSP00000361943 | HEYL     | 0.5211 |
| ENSP00000385638 | HADH     | 0.5211 |
| ENSP00000262903 | HACE1    | 0.5211 |
| ENSP00000283875 | GTF2E1   | 0.5211 |
| ENSP00000374390 | GPR149   | 0.5211 |
| ENSP00000405573 | GPI      | 0.5211 |
| ENSP00000392859 | GMPR2    | 0.5211 |
| ENSP00000351706 | GK2      | 0.5211 |
| ENSP00000265857 | GET4     | 0.5211 |
| ENSP00000394071 | GDI1     | 0.5211 |
| ENSP00000377192 | G6PD     | 0.5211 |
| ENSP00000256759 | FST      | 0.5211 |
| ENSP00000261302 | FOXN3    | 0.5211 |
| ENSP00000359693 | FKBP1C   | 0.5211 |
| ENSP00000260270 | FDX1     | 0.5211 |
| ENSP00000349078 | FDPS     | 0.5211 |
| ENSP00000369666 | FBXL19   | 0.5211 |
| ENSP00000416387 | FBLIM1   | 0.5211 |
| ENSP00000267430 | FANCM    | 0.5211 |
| ENSP00000033079 | FAM13B   | 0.5211 |
| ENSP00000253496 | F12      | 0.5211 |

|                 |          |        |
|-----------------|----------|--------|
| ENSP00000364709 | F10      | 0.5211 |
| ENSP00000361725 | ENDOG    | 0.5211 |
| ENSP00000304736 | ELOVL6   | 0.5211 |
| ENSP00000258416 | EIF4E2   | 0.5211 |
| ENSP00000318057 | EGR3     | 0.5211 |
| ENSP00000224073 | EDF1     | 0.5211 |
| ENSP00000357535 | ECHS1    | 0.5211 |
| ENSP00000279488 | DUSP6    | 0.5211 |
| ENSP00000373169 | DRD3     | 0.5211 |
| ENSP00000353731 | DPP4     | 0.5211 |
| ENSP00000262415 | DHX8     | 0.5211 |
| ENSP00000286234 | DEPTOR   | 0.5211 |
| ENSP00000280557 | DENR     | 0.5211 |
| ENSP00000250498 | DAD1     | 0.5211 |
| ENSP00000398736 | CYR61    | 0.5211 |
| ENSP00000409075 | CYB5RL   | 0.5211 |
| ENSP00000262061 | COPZ1    | 0.5211 |
| ENSP00000325002 | COPG1    | 0.5211 |
| ENSP00000380602 | CNTN4    | 0.5211 |
| ENSP00000322887 | CIRBP    | 0.5211 |
| ENSP00000256509 | CHL1     | 0.5211 |
| ENSP00000392395 | CHFR     | 0.5211 |
| ENSP00000382863 | CHD8     | 0.5211 |
| ENSP00000369716 | CHD3     | 0.5211 |
| ENSP00000250838 | CDY2A    | 0.5211 |
| ENSP00000328228 | CDCA2    | 0.5211 |
| ENSP00000280200 | CD226    | 0.5211 |
| ENSP00000280326 | CCT5     | 0.5211 |
| ENSP00000358327 | CASP7    | 0.5211 |
| ENSP00000264645 | CASC3    | 0.5211 |
| ENSP00000458149 | CAMP     | 0.5211 |
| ENSP00000009105 | CAMK1G   | 0.5211 |
| ENSP00000285379 | CA2      | 0.5211 |
| ENSP00000302397 | ATP1A3   | 0.5211 |
| ENSP00000322628 | ARL4D    | 0.5211 |
| ENSP00000263674 | ARHGEF17 | 0.5211 |
| ENSP00000336666 | AP1S1    | 0.5211 |
| ENSP00000362010 | ANXA7    | 0.5211 |
| ENSP00000265748 | ANLN     | 0.5211 |
| ENSP00000322175 | AK4      | 0.5211 |
| ENSP00000287295 | AIFM1    | 0.5211 |
| ENSP00000311405 | ADCY6    | 0.5211 |
| ENSP00000286657 | ADAMTS3  | 0.5211 |
| ENSP00000256001 | ACTR3B   | 0.5211 |
| ENSP00000346733 | ACAP3    | 0.5211 |
| ENSP00000263817 | ABCB11   | 0.5211 |
| ENSP00000343488 | EARS2    | 0.5211 |
| ENSP00000355317 | WDTC1    | 0.5184 |
| ENSP00000261405 | VWF      | 0.5184 |
| ENSP00000261517 | VPS13C   | 0.5184 |
| ENSP00000381282 | VIMP     | 0.5184 |
| ENSP00000294728 | VCAM1    | 0.5184 |
| ENSP00000310800 | VANGL1   | 0.5184 |



|                 |                |        |
|-----------------|----------------|--------|
| ENSP00000324560 | ULK1           | 0.5184 |
| ENSP00000379217 | UBFD1          | 0.5184 |
| ENSP00000347836 | UBE2H          | 0.5184 |
| ENSP00000338413 | UBA1           | 0.5184 |
| ENSP00000308000 | TUT1           | 0.5184 |
| ENSP00000451560 | TUBB3          | 0.5184 |
| ENSP00000363095 | TRIM32         | 0.5184 |
| ENSP00000341957 | TP53BP2        | 0.5184 |
| ENSP00000353735 | TOPORS         | 0.5184 |
| ENSP00000361636 | TNNC2          | 0.5184 |
| ENSP00000442046 | TMTC1          | 0.5184 |
| ENSP00000433967 | TM9SF1         | 0.5184 |
| ENSP00000215570 | TIMM13         | 0.5184 |
| ENSP00000355330 | TGM2           | 0.5184 |
| ENSP00000454021 | TGIF2-C20orf24 | 0.5184 |
| ENSP00000240335 | TBX4           | 0.5184 |
| ENSP00000328879 | TBL1Y          | 0.5184 |
| ENSP00000362399 | STXBP1         | 0.5184 |
| ENSP00000350071 | STRN3          | 0.5184 |
| ENSP00000358810 | STRIP1         | 0.5184 |
| ENSP00000320754 | STK33          | 0.5184 |
| ENSP00000381030 | STK32A         | 0.5184 |
| ENSP00000381968 | SPTLC3         | 0.5184 |
| ENSP00000359567 | SOX3           | 0.5184 |
| ENSP00000284776 | SORBS2         | 0.5184 |
| ENSP00000300413 | SNRPD1         | 0.5184 |
| ENSP00000281456 | SLC25A4        | 0.5184 |
| ENSP00000378364 | SLC11A2        | 0.5184 |
| ENSP00000353157 | SEPT2          | 0.5184 |
| ENSP00000359380 | SCD            | 0.5184 |
| ENSP00000357799 | S100A10        | 0.5184 |
| ENSP00000355533 | RYSR2          | 0.5184 |
| ENSP00000043402 | RTN4R          | 0.5184 |
| ENSP00000349131 | RSPO3          | 0.5184 |
| ENSP00000288666 | RPS4Y2         | 0.5184 |
| ENSP00000362744 | RPS4X          | 0.5184 |
| ENSP00000418082 | RPL37A         | 0.5184 |
| ENSP00000362131 | RPA4           | 0.5184 |
| ENSP00000462196 | RP11-403P17.5  | 0.5184 |
| ENSP00000366093 | RORB           | 0.5184 |
| ENSP00000351697 | REV3L          | 0.5184 |
| ENSP00000262031 | RBMS2          | 0.5184 |
| ENSP00000348577 | RANGAP1        | 0.5184 |
| ENSP00000019317 | RALBP1         | 0.5184 |
| ENSP00000351832 | RAB3GAP2       | 0.5184 |
| ENSP00000411418 | RAB3GAP1       | 0.5184 |
| ENSP00000402060 | PVR            | 0.5184 |
| ENSP00000354612 | PTGS1          | 0.5184 |
| ENSP00000216802 | PSME2          | 0.5184 |
| ENSP00000310572 | PSMC5          | 0.5184 |
| ENSP00000311121 | PSMA8          | 0.5184 |
| ENSP00000311290 | PROP1          | 0.5184 |
| ENSP00000351885 | PPP2R4         | 0.5184 |

|                 |          |        |
|-----------------|----------|--------|
| ENSP00000311344 | PPP2R1B  | 0.5184 |
| ENSP00000335084 | PPP1CC   | 0.5184 |
| ENSP00000264714 | PPM1G    | 0.5184 |
| ENSP00000300026 | PPIB     | 0.5184 |
| ENSP00000419425 | PPIA     | 0.5184 |
| ENSP00000312649 | PPARGC1B | 0.5184 |
| ENSP00000402065 | POLR2J2  | 0.5184 |
| ENSP00000264233 | POLQ     | 0.5184 |
| ENSP00000300055 | PLIN1    | 0.5184 |
| ENSP00000279230 | PLCB3    | 0.5184 |
| ENSP00000359552 | PKN2     | 0.5184 |
| ENSP00000266497 | PIK3C2G  | 0.5184 |
| ENSP00000341805 | PHF10    | 0.5184 |
| ENSP00000334910 | PDE2A    | 0.5184 |
| ENSP00000381499 | PAX1     | 0.5184 |
| ENSP00000351049 | PAK4     | 0.5184 |
| ENSP00000219097 | ORC6     | 0.5184 |
| ENSP00000229179 | NUP107   | 0.5184 |
| ENSP00000339503 | NUDT1    | 0.5184 |
| ENSP00000281081 | NUBPL    | 0.5184 |
| ENSP00000309126 | NSUN5    | 0.5184 |
| ENSP00000317992 | NOC2L    | 0.5184 |
| ENSP00000356785 | NME7     | 0.5184 |
| ENSP00000386394 | NIF3L1   | 0.5184 |
| ENSP00000324792 | NFATC2IP | 0.5184 |
| ENSP00000266544 | NDUFA9   | 0.5184 |
| ENSP00000428657 | NAIP     | 0.5184 |
| ENSP00000417763 | NAA10    | 0.5184 |
| ENSP00000418734 | MYSM1    | 0.5184 |
| ENSP00000355536 | MTR      | 0.5184 |
| ENSP00000377617 | MTHFD2   | 0.5184 |
| ENSP00000320567 | MRPS33   | 0.5184 |
| ENSP00000356001 | MRPL18   | 0.5184 |
| ENSP00000343463 | MAP3K2   | 0.5184 |
| ENSP00000451511 | LY75     | 0.5184 |
| ENSP00000312652 | LEP      | 0.5184 |
| ENSP00000314311 | LARP7    | 0.5184 |
| ENSP00000374309 | LAMA1    | 0.5184 |
| ENSP00000295225 | KCNIP3   | 0.5184 |
| ENSP00000267082 | ITGB7    | 0.5184 |
| ENSP00000310623 | ISCU     | 0.5184 |
| ENSP00000360730 | IL13RA1  | 0.5184 |
| ENSP00000348784 | IGBP1    | 0.5184 |
| ENSP00000367623 | HSPA14   | 0.5184 |
| ENSP00000351108 | HNRNPAB  | 0.5184 |
| ENSP00000408146 | HLA-DPB1 | 0.5184 |
| ENSP00000291823 | HIPK4    | 0.5184 |
| ENSP00000382269 | HECTD1   | 0.5184 |
| ENSP00000354581 | GPX6     | 0.5184 |
| ENSP00000366267 | GPC5     | 0.5184 |
| ENSP00000461460 | GOSR2    | 0.5184 |
| ENSP00000248564 | GNG11    | 0.5184 |
| ENSP00000331313 | GNB1L    | 0.5184 |

|                 |         |        |
|-----------------|---------|--------|
| ENSP00000306920 | GLB1    | 0.5184 |
| ENSP00000354347 | GFPT1   | 0.5184 |
| ENSP00000220429 | GABPB1  | 0.5184 |
| ENSP00000366814 | FOXD4L2 | 0.5184 |
| ENSP00000292180 | FLAD1   | 0.5184 |
| ENSP00000326022 | FHL5    | 0.5184 |
| ENSP00000306099 | FGB     | 0.5184 |
| ENSP00000401445 | ERN1    | 0.5184 |
| ENSP00000233057 | EIF2AK2 | 0.5184 |
| ENSP00000267803 | DUOXA1  | 0.5184 |
| ENSP00000322885 | DTX2    | 0.5184 |
| ENSP00000265104 | DNAH5   | 0.5184 |
| ENSP00000371711 | DMRT1   | 0.5184 |
| ENSP00000353132 | DMBX1   | 0.5184 |
| ENSP00000389870 | DLX3    | 0.5184 |
| ENSP00000350616 | DDC     | 0.5184 |
| ENSP00000301764 | DDB1    | 0.5184 |
| ENSP00000376808 | CUL5    | 0.5184 |
| ENSP00000355050 | CTNNB1  | 0.5184 |
| ENSP00000273179 | CTDSPL  | 0.5184 |
| ENSP00000273857 | CORIN   | 0.5184 |
| ENSP00000366275 | CNNM4   | 0.5184 |
| ENSP00000266546 | CLSTN3  | 0.5184 |
| ENSP00000418287 | CIAO1   | 0.5184 |
| ENSP00000301280 | CHAF1A  | 0.5184 |
| ENSP00000364737 | CENPP   | 0.5184 |
| ENSP00000303178 | CDY1B   | 0.5184 |
| ENSP00000271324 | CD53    | 0.5184 |
| ENSP00000295688 | CCT3    | 0.5184 |
| ENSP00000295055 | CAPN13  | 0.5184 |
| ENSP00000263119 | CABIN1  | 0.5184 |
| ENSP00000358474 | BRCC3   | 0.5184 |
| ENSP00000269980 | BCKDHA  | 0.5184 |
| ENSP00000443459 | BCAT1   | 0.5184 |
| ENSP00000310275 | BANF1   | 0.5184 |
| ENSP00000238789 | ATAD2B  | 0.5184 |
| ENSP00000371517 | AMACR   | 0.5184 |
| ENSP00000375881 | ALPP    | 0.5184 |
| ENSP00000249750 | ALDH1A2 | 0.5184 |
| ENSP00000356825 | ADCY10  | 0.5184 |
| ENSP00000309968 | ADAM17  | 0.5184 |
| ENSP00000397552 | ACTL6A  | 0.5184 |
| ENSP00000218758 | ACP5    | 0.5184 |
| ENSP00000260645 | ABCG5   | 0.5184 |
| ENSP00000432545 | NANOGP1 | 0.5184 |
| ENSP00000262383 | ZNF423  | 0.5158 |
| ENSP00000360017 | ZNF280C | 0.5158 |
| ENSP00000288828 | WIPI2   | 0.5158 |
| ENSP00000311127 | VEGFB   | 0.5158 |
| ENSP00000263864 | VAMP8   | 0.5158 |
| ENSP00000262803 | UPF1    | 0.5158 |
| ENSP00000302640 | UBTF    | 0.5158 |
| ENSP00000376215 | UBE2E3  | 0.5158 |

|                 |              |        |
|-----------------|--------------|--------|
| ENSP00000383365 | TXNRD2       | 0.5158 |
| ENSP00000392549 | TLL3         | 0.5158 |
| ENSP00000406407 | TSPY10       | 0.5158 |
| ENSP00000339299 | TRIO         | 0.5158 |
| ENSP00000460823 | TOM1L1       | 0.5158 |
| ENSP00000360483 | TMEM48       | 0.5158 |
| ENSP00000389414 | TBXAS1       | 0.5158 |
| ENSP00000362068 | TAF8         | 0.5158 |
| ENSP00000418379 | TAF1L        | 0.5158 |
| ENSP00000308022 | TADA2B       | 0.5158 |
| ENSP00000377262 | SRPK2        | 0.5158 |
| ENSP00000337513 | SRA1         | 0.5158 |
| ENSP00000330221 | SPSB1        | 0.5158 |
| ENSP00000355217 | SNX6         | 0.5158 |
| ENSP00000374152 | SMYD5        | 0.5158 |
| ENSP00000370990 | SHOX         | 0.5158 |
| ENSP00000418744 | SH3GLB1      | 0.5158 |
| ENSP00000268220 | SEC11A       | 0.5158 |
| ENSP00000225430 | RPL19        | 0.5158 |
| ENSP00000354739 | RPL12        | 0.5158 |
| ENSP00000341730 | RPL10        | 0.5158 |
| ENSP00000414068 | RP4-559A3.7  | 0.5158 |
| ENSP00000461295 | RP11-343C2.3 | 0.5158 |
| ENSP00000290524 | RFX5         | 0.5158 |
| ENSP00000317636 | RECQL5       | 0.5158 |
| ENSP00000359645 | RBMX         | 0.5158 |
| ENSP00000333001 | RBM8A        | 0.5158 |
| ENSP00000264431 | RAPGEF2      | 0.5158 |
| ENSP00000394415 | PTGES3L      | 0.5158 |
| ENSP00000343966 | PSPC1        | 0.5158 |
| ENSP00000290541 | PSMB4        | 0.5158 |
| ENSP00000355747 | PSEN2        | 0.5158 |
| ENSP00000234071 | PROC         | 0.5158 |
| ENSP00000305355 | PRKCB        | 0.5158 |
| ENSP00000233944 | PRKAG3       | 0.5158 |
| ENSP00000331065 | PPP1R27      | 0.5158 |
| ENSP00000200453 | PPP1R15A     | 0.5158 |
| ENSP00000253329 | PPIL4        | 0.5158 |
| ENSP00000215587 | POLR2E       | 0.5158 |
| ENSP00000323856 | PLEC         | 0.5158 |
| ENSP00000348888 | PIGR         | 0.5158 |
| ENSP00000384197 | PDZRN4       | 0.5158 |
| ENSP00000300289 | PDIA3        | 0.5158 |
| ENSP00000369134 | PDHA1        | 0.5158 |
| ENSP00000422464 | PDGFC        | 0.5158 |
| ENSP00000285083 | OXNAD1       | 0.5158 |
| ENSP00000285420 | OTUD6B       | 0.5158 |
| ENSP00000284719 | OLA1         | 0.5158 |
| ENSP00000294172 | NXF1         | 0.5158 |
| ENSP00000419628 | NUDT5        | 0.5158 |
| ENSP00000262302 | NUBP2        | 0.5158 |
| ENSP00000223190 | NRF1         | 0.5158 |
| ENSP00000242152 | NPY          | 0.5158 |

|                 |          |        |
|-----------------|----------|--------|
| ENSP00000359024 | NOLC1    | 0.5158 |
| ENSP00000419457 | NOBOX    | 0.5158 |
| ENSP00000265191 | NME5     | 0.5158 |
| ENSP00000388910 | NFATC4   | 0.5158 |
| ENSP00000251588 | NARFL    | 0.5158 |
| ENSP00000407952 | NAMPTL   | 0.5158 |
| ENSP00000307280 | MYL1     | 0.5158 |
| ENSP00000220058 | MTFMT    | 0.5158 |
| ENSP00000278823 | MTA2     | 0.5158 |
| ENSP00000225969 | MRPL27   | 0.5158 |
| ENSP00000297508 | MICALL2  | 0.5158 |
| ENSP00000235329 | MFN2     | 0.5158 |
| ENSP00000386951 | MED26    | 0.5158 |
| ENSP00000000412 | M6PR     | 0.5158 |
| ENSP00000303634 | LRP8     | 0.5158 |
| ENSP00000273261 | LRIG1    | 0.5158 |
| ENSP00000321537 | LLGL1    | 0.5158 |
| ENSP00000367787 | LIG3     | 0.5158 |
| ENSP00000377854 | LHX6     | 0.5158 |
| ENSP00000329243 | KRT7     | 0.5158 |
| ENSP00000330878 | KPNA7    | 0.5158 |
| ENSP00000334373 | KPNA4    | 0.5158 |
| ENSP00000259335 | KIAA0368 | 0.5158 |
| ENSP00000370744 | ITPR2    | 0.5158 |
| ENSP00000268296 | ITGAX    | 0.5158 |
| ENSP00000331103 | IP6K2    | 0.5158 |
| ENSP00000243786 | INHA     | 0.5158 |
| ENSP00000320566 | ING3     | 0.5158 |
| ENSP00000244174 | IL9R     | 0.5158 |
| ENSP00000256452 | IL5RA    | 0.5158 |
| ENSP00000363779 | IKBKAP   | 0.5158 |
| ENSP00000290341 | IGF2BP1  | 0.5158 |
| ENSP00000343957 | IFNAR2   | 0.5158 |
| ENSP00000276927 | IFNA1    | 0.5158 |
| ENSP00000298556 | HPRT1    | 0.5158 |
| ENSP00000359680 | HOGA1    | 0.5158 |
| ENSP00000264350 | HERC5    | 0.5158 |
| ENSP00000254854 | GUCY2D   | 0.5158 |
| ENSP00000306138 | GRM5     | 0.5158 |
| ENSP00000392398 | GPX5     | 0.5158 |
| ENSP00000359539 | GOT1     | 0.5158 |
| ENSP00000472249 | GMFG     | 0.5158 |
| ENSP00000322716 | GLYR1    | 0.5158 |
| ENSP00000362463 | GLO1     | 0.5158 |
| ENSP00000418001 | GK5      | 0.5158 |
| ENSP00000248923 | GGT1     | 0.5158 |
| ENSP00000311962 | GGA2     | 0.5158 |
| ENSP00000253408 | GFAP     | 0.5158 |
| ENSP00000318977 | GEN1     | 0.5158 |
| ENSP00000366630 | FOXD4L4  | 0.5158 |
| ENSP00000369335 | FBXO18   | 0.5158 |
| ENSP00000347834 | FBXL3    | 0.5158 |
| ENSP00000364731 | F7       | 0.5158 |

|                 |            |        |
|-----------------|------------|--------|
| ENSP00000262455 | ERP44      | 0.5158 |
| ENSP00000237853 | ELL2       | 0.5158 |
| ENSP00000349594 | ELAVL4     | 0.5158 |
| ENSP00000354722 | EIF1AY     | 0.5158 |
| ENSP00000357392 | EFNA1      | 0.5158 |
| ENSP00000331901 | EEF1G      | 0.5158 |
| ENSP00000240343 | DYNLL2     | 0.5158 |
| ENSP00000262177 | DNAJB6     | 0.5158 |
| ENSP00000404381 | DNAJB14    | 0.5158 |
| ENSP00000330671 | DNAH11     | 0.5158 |
| ENSP00000363480 | DLG3       | 0.5158 |
| ENSP00000216500 | DHRS7      | 0.5158 |
| ENSP00000362217 | DACH2      | 0.5158 |
| ENSP00000408236 | CYTH2      | 0.5158 |
| ENSP00000354468 | CYB5R3     | 0.5158 |
| ENSP00000341625 | CYB5A      | 0.5158 |
| ENSP00000220166 | CTSH       | 0.5158 |
| ENSP00000466514 | CTB-54O9.9 | 0.5158 |
| ENSP00000291568 | CSTB       | 0.5158 |
| ENSP00000308236 | COMMD1     | 0.5158 |
| ENSP00000360882 | COL5A1     | 0.5158 |
| ENSP00000362776 | COL16A1    | 0.5158 |
| ENSP00000264638 | CNTNAP1    | 0.5158 |
| ENSP00000064724 | CLDN11     | 0.5158 |
| ENSP00000300283 | CKMT1B     | 0.5158 |
| ENSP00000262315 | CHTF18     | 0.5158 |
| ENSP00000341159 | CERKL      | 0.5158 |
| ENSP00000265071 | CDH6       | 0.5158 |
| ENSP00000356405 | CDC73      | 0.5158 |
| ENSP00000353362 | CACNA1A    | 0.5158 |
| ENSP00000245907 | C3         | 0.5158 |
| ENSP00000348107 | C1D        | 0.5158 |
| ENSP00000378181 | BRD7       | 0.5158 |
| ENSP00000372210 | BET1L      | 0.5158 |
| ENSP00000222547 | BET1       | 0.5158 |
| ENSP00000364883 | AUH        | 0.5158 |
| ENSP00000306003 | ATP5I      | 0.5158 |
| ENSP00000370414 | ATP5EP2    | 0.5158 |
| ENSP00000466174 | ATF7       | 0.5158 |
| ENSP00000262215 | ARFGEF1    | 0.5158 |
| ENSP00000264028 | ARCN1      | 0.5158 |
| ENSP00000233242 | APOB       | 0.5158 |
| ENSP00000263574 | APLP2      | 0.5158 |
| ENSP00000174653 | AP3M2      | 0.5158 |
| ENSP00000377170 | ANKRD39    | 0.5158 |
| ENSP00000332256 | ALDH1A3    | 0.5158 |
| ENSP00000355465 | AHCTF1     | 0.5158 |
| ENSP00000310978 | AGXT2L2    | 0.5158 |
| ENSP00000368766 | ADRA1D     | 0.5158 |
| ENSP00000355739 | ADCK3      | 0.5158 |
| ENSP00000251582 | ADAMTS2    | 0.5158 |
| ENSP00000414558 | ABHD4      | 0.5158 |
| ENSP00000359233 | ABCD3      | 0.5158 |

|                 |          |        |
|-----------------|----------|--------|
| ENSP00000225402 | AATF     | 0.5158 |
| ENSP00000353586 | ZNF280B  | 0.5132 |
| ENSP00000440847 | ZNF185   | 0.5132 |
| ENSP00000322845 | ZMYM3    | 0.5132 |
| ENSP00000251038 | ZC3H14   | 0.5132 |
| ENSP00000329614 | YBEY     | 0.5132 |
| ENSP00000313059 | WNK1     | 0.5132 |
| ENSP00000267199 | VPS33A   | 0.5132 |
| ENSP00000258123 | USP15    | 0.5132 |
| ENSP00000338703 | UGP2     | 0.5132 |
| ENSP00000428209 | UBE2V2   | 0.5132 |
| ENSP00000373570 | TYRP1    | 0.5132 |
| ENSP00000290846 | TRMU     | 0.5132 |
| ENSP00000456272 | TRIM59   | 0.5132 |
| ENSP00000367030 | TRDMT1   | 0.5132 |
| ENSP00000450635 | TMEM189  | 0.5132 |
| ENSP00000233638 | TLX2     | 0.5132 |
| ENSP00000295899 | THOC7    | 0.5132 |
| ENSP00000354588 | TEAD1    | 0.5132 |
| ENSP00000395574 | TCEB3    | 0.5132 |
| ENSP00000312624 | TCAP     | 0.5132 |
| ENSP00000362590 | TBC1D22B | 0.5132 |
| ENSP00000448182 | TBC1D15  | 0.5132 |
| ENSP00000346206 | TAP1     | 0.5132 |
| ENSP00000258281 | TAF5L    | 0.5132 |
| ENSP00000356224 | SYNE1    | 0.5132 |
| ENSP00000295770 | STT3B    | 0.5132 |
| ENSP00000310969 | STON1    | 0.5132 |
| ENSP00000368952 | STOML3   | 0.5132 |
| ENSP00000349259 | SPTBN1   | 0.5132 |
| ENSP00000378517 | SPP1     | 0.5132 |
| ENSP00000311684 | SPEG     | 0.5132 |
| ENSP00000256637 | SORT1    | 0.5132 |
| ENSP00000371554 | SOD3     | 0.5132 |
| ENSP00000370119 | SMN2     | 0.5132 |
| ENSP00000323967 | SMARCE1  | 0.5132 |
| ENSP00000450909 | SLIRP    | 0.5132 |
| ENSP00000230671 | SLC6A7   | 0.5132 |
| ENSP00000261707 | SLC6A4   | 0.5132 |
| ENSP00000355893 | SLC30A10 | 0.5132 |
| ENSP00000383212 | SGSM1    | 0.5132 |
| ENSP00000350447 | SGOL2    | 0.5132 |
| ENSP00000372221 | SERPINB5 | 0.5132 |
| ENSP00000341524 | SEPT6    | 0.5132 |
| ENSP00000368572 | SAT1     | 0.5132 |
| ENSP00000337838 | RTN4     | 0.5132 |
| ENSP00000355315 | RPL39    | 0.5132 |
| ENSP00000346001 | RPL3     | 0.5132 |
| ENSP00000375730 | RPL13A   | 0.5132 |
| ENSP00000304670 | RNFT1    | 0.5132 |
| ENSP00000324956 | RNF14    | 0.5132 |
| ENSP00000373277 | RBMS3    | 0.5132 |
| ENSP00000358042 | QRSL1    | 0.5132 |

|                 |          |        |
|-----------------|----------|--------|
| ENSP00000216392 | PYGL     | 0.5132 |
| ENSP00000344909 | PTP4A2   | 0.5132 |
| ENSP00000379213 | PTHLH    | 0.5132 |
| ENSP00000244043 | PTGIS    | 0.5132 |
| ENSP00000349003 | PTGER3   | 0.5132 |
| ENSP00000217958 | PSMD10   | 0.5132 |
| ENSP00000401802 | PSMC6    | 0.5132 |
| ENSP00000365494 | PRICKLE3 | 0.5132 |
| ENSP00000296122 | PPP1CB   | 0.5132 |
| ENSP00000286175 | PPIL3    | 0.5132 |
| ENSP00000354871 | PPEF1    | 0.5132 |
| ENSP00000369071 | POSTN    | 0.5132 |
| ENSP00000331678 | PKP3     | 0.5132 |
| ENSP00000357883 | PIP5K1A  | 0.5132 |
| ENSP00000262719 | PHLPP1   | 0.5132 |
| ENSP00000305995 | PGK2     | 0.5132 |
| ENSP00000417587 | PEG10    | 0.5132 |
| ENSP00000358033 | PDSS2    | 0.5132 |
| ENSP00000288050 | PDPR     | 0.5132 |
| ENSP00000449770 | PA2G4    | 0.5132 |
| ENSP00000257570 | OASL     | 0.5132 |
| ENSP00000230792 | NUDT12   | 0.5132 |
| ENSP00000310205 | NRIP3    | 0.5132 |
| ENSP00000346196 | NDUFV3   | 0.5132 |
| ENSP00000276689 | NDUFB9   | 0.5132 |
| ENSP00000261597 | NDC80    | 0.5132 |
| ENSP00000354152 | MTHFSD   | 0.5132 |
| ENSP00000354632 | MT-ATP6  | 0.5132 |
| ENSP00000261507 | MSMO1    | 0.5132 |
| ENSP00000391664 | MFRP     | 0.5132 |
| ENSP00000325312 | METAP2   | 0.5132 |
| ENSP00000215555 | MARCH2   | 0.5132 |
| ENSP00000300249 | MAPRE2   | 0.5132 |
| ENSP00000304604 | MAGI3    | 0.5132 |
| ENSP00000374135 | LRP1B    | 0.5132 |
| ENSP00000261596 | LPIN2    | 0.5132 |
| ENSP00000340688 | LPHN1    | 0.5132 |
| ENSP00000377900 | LIPF     | 0.5132 |
| ENSP00000341947 | LIN54    | 0.5132 |
| ENSP00000261731 | LHX5     | 0.5132 |
| ENSP00000300051 | LDHD     | 0.5132 |
| ENSP00000302393 | LDHAL6B  | 0.5132 |
| ENSP00000375810 | KLC3     | 0.5132 |
| ENSP00000341466 | KIF18B   | 0.5132 |
| ENSP00000258739 | KDEL2    | 0.5132 |
| ENSP00000345708 | KCNJ11   | 0.5132 |
| ENSP00000262644 | IMPAD1   | 0.5132 |
| ENSP00000321345 | IL23R    | 0.5132 |
| ENSP00000233946 | IL1R1    | 0.5132 |
| ENSP00000280357 | IL18     | 0.5132 |
| ENSP00000371634 | IGF2BP2  | 0.5132 |
| ENSP00000388223 | IFNAR2   | 0.5132 |
| ENSP00000287936 | HMGCR    | 0.5132 |



|                 |          |        |
|-----------------|----------|--------|
| ENSP00000364310 | H2AFX    | 0.5132 |
| ENSP00000311469 | GSTM1    | 0.5132 |
| ENSP00000338573 | GNL3L    | 0.5132 |
| ENSP00000307900 | GLUL     | 0.5132 |
| ENSP00000241124 | GJB6     | 0.5132 |
| ENSP00000262460 | GINS1    | 0.5132 |
| ENSP00000307939 | GCC2     | 0.5132 |
| ENSP00000366525 | FTL      | 0.5132 |
| ENSP00000162391 | FOXJ2    | 0.5132 |
| ENSP00000366693 | FOXD4L6  | 0.5132 |
| ENSP00000071281 | FHL1     | 0.5132 |
| ENSP00000364277 | FGD1     | 0.5132 |
| ENSP00000243167 | FAAH     | 0.5132 |
| ENSP00000419945 | ERVW-1   | 0.5132 |
| ENSP00000341138 | EPB41L3  | 0.5132 |
| ENSP00000261868 | EIF3J    | 0.5132 |
| ENSP00000221418 | ECH1     | 0.5132 |
| ENSP00000361667 | DOLK     | 0.5132 |
| ENSP00000441858 | DMXL2    | 0.5132 |
| ENSP00000247191 | DLGAP5   | 0.5132 |
| ENSP00000301180 | DIP2B    | 0.5132 |
| ENSP00000264093 | DGUOK    | 0.5132 |
| ENSP00000260184 | DDX60L   | 0.5132 |
| ENSP00000368667 | DDX53    | 0.5132 |
| ENSP00000401363 | DAZ4     | 0.5132 |
| ENSP00000247170 | DAAM1    | 0.5132 |
| ENSP00000370460 | CWC27    | 0.5132 |
| ENSP00000381148 | CTDSP2   | 0.5132 |
| ENSP00000332444 | CSTF2T   | 0.5132 |
| ENSP00000280527 | CRIM1    | 0.5132 |
| ENSP00000181383 | CPB2     | 0.5132 |
| ENSP00000261643 | COX10    | 0.5132 |
| ENSP00000309338 | CLCF1    | 0.5132 |
| ENSP00000364976 | CKS2     | 0.5132 |
| ENSP00000306490 | CHRM1    | 0.5132 |
| ENSP00000355511 | CHML     | 0.5132 |
| ENSP00000283882 | CFDP1    | 0.5132 |
| ENSP00000381768 | CDH23    | 0.5132 |
| ENSP00000370781 | CDC20B   | 0.5132 |
| ENSP00000259633 | CD72     | 0.5132 |
| ENSP00000296140 | CCR1     | 0.5132 |
| ENSP00000374529 | CCNK     | 0.5132 |
| ENSP00000295006 | CAPN2    | 0.5132 |
| ENSP00000312741 | CAMKK2   | 0.5132 |
| ENSP00000256460 | CAMK1    | 0.5132 |
| ENSP00000269127 | C17orf64 | 0.5132 |
| ENSP00000376914 | ATP2C1   | 0.5132 |
| ENSP00000349325 | ATP10A   | 0.5132 |
| ENSP00000369217 | ARIH1    | 0.5132 |
| ENSP00000318775 | ANAPC4   | 0.5132 |
| ENSP00000430075 | AMPD1    | 0.5132 |
| ENSP00000226253 | ALDOC    | 0.5132 |
| ENSP00000267584 | AK7      | 0.5132 |

|                 |         |        |
|-----------------|---------|--------|
| ENSP00000349525 | AHSA2   | 0.5132 |
| ENSP00000269143 | AFG3L2  | 0.5132 |
| ENSP00000381840 | AEBP2   | 0.5132 |
| ENSP00000286621 | ADK     | 0.5132 |
| ENSP00000320709 | ADIPOQ  | 0.5132 |
| ENSP00000336842 | ACTR8   | 0.5132 |
| ENSP00000331514 | ACTG1   | 0.5132 |
| ENSP00000217455 | ACOT8   | 0.5132 |
| ENSP00000265838 | ACAT1   | 0.5132 |
| ENSP00000264990 | ACAD11  | 0.5132 |
| ENSP00000296577 | ABCE1   | 0.5132 |
| ENSP00000377040 | AASS    | 0.5132 |
| ENSP00000361280 | MAT1A   | 0.5132 |
| ENSP00000360817 | ZNFX1   | 0.5105 |
| ENSP00000351137 | XAB2    | 0.5105 |
| ENSP00000350854 | VPS13D  | 0.5105 |
| ENSP00000359869 | USP26   | 0.5105 |
| ENSP00000401197 | USP19   | 0.5105 |
| ENSP00000203407 | UQCRC1  | 0.5105 |
| ENSP00000364403 | UBR4    | 0.5105 |
| ENSP00000222402 | UBE2D4  | 0.5105 |
| ENSP00000246548 | UBA2    | 0.5105 |
| ENSP00000360329 | TTC4    | 0.5105 |
| ENSP00000233623 | TTC31   | 0.5105 |
| ENSP00000403304 | TSPY1   | 0.5105 |
| ENSP00000340913 | TRPC6   | 0.5105 |
| ENSP00000251607 | TRNT1   | 0.5105 |
| ENSP00000252136 | TRMT2A  | 0.5105 |
| ENSP00000381240 | TRDN    | 0.5105 |
| ENSP00000262709 | TOX4    | 0.5105 |
| ENSP00000405926 | TMED7   | 0.5105 |
| ENSP00000218032 | TLR8    | 0.5105 |
| ENSP00000355119 | TGIF2LX | 0.5105 |
| ENSP00000276603 | TERF1   | 0.5105 |
| ENSP00000370607 | TECRL   | 0.5105 |
| ENSP00000215567 | TECR    | 0.5105 |
| ENSP00000234827 | TCEANC2 | 0.5105 |
| ENSP00000393333 | TBXA2R  | 0.5105 |
| ENSP00000356795 | TBX19   | 0.5105 |
| ENSP00000276072 | TAF1    | 0.5105 |
| ENSP00000263918 | STRN    | 0.5105 |
| ENSP00000348278 | STK39   | 0.5105 |
| ENSP00000379964 | STK16   | 0.5105 |
| ENSP00000262554 | SPTLC1  | 0.5105 |
| ENSP00000268704 | SPG7    | 0.5105 |
| ENSP00000309710 | SLC39A1 | 0.5105 |
| ENSP00000075120 | SLC2A3  | 0.5105 |
| ENSP00000360671 | SLC25A5 | 0.5105 |
| ENSP00000221485 | SLC17A7 | 0.5105 |
| ENSP00000316842 | SIX5    | 0.5105 |
| ENSP00000459962 | SHPK    | 0.5105 |
| ENSP00000358464 | SHOC2   | 0.5105 |
| ENSP00000369816 | SHBG    | 0.5105 |

|                 |              |        |
|-----------------|--------------|--------|
| ENSP00000309714 | SH3PXD2B     | 0.5105 |
| ENSP00000332513 | SH3BGR       | 0.5105 |
| ENSP00000338343 | SGCD         | 0.5105 |
| ENSP00000390783 | SCFD1        | 0.5105 |
| ENSP00000264027 | SC5D         | 0.5105 |
| ENSP00000303248 | RXFP1        | 0.5105 |
| ENSP00000302896 | RPS9         | 0.5105 |
| ENSP00000346027 | RPL21        | 0.5105 |
| ENSP00000359688 | RPF1         | 0.5105 |
| ENSP00000385916 | RP11-145E5.5 | 0.5105 |
| ENSP00000362937 | RCC1         | 0.5105 |
| ENSP00000340176 | RBPM5        | 0.5105 |
| ENSP00000316543 | RAPH1        | 0.5105 |
| ENSP00000466399 | RAD51D       | 0.5105 |
| ENSP00000347839 | RAB11FIP2    | 0.5105 |
| ENSP00000304336 | PYDC1        | 0.5105 |
| ENSP00000384211 | PSME4        | 0.5105 |
| ENSP00000357879 | PSMD4        | 0.5105 |
| ENSP00000355325 | PSMB5        | 0.5105 |
| ENSP00000266079 | PRPF6        | 0.5105 |
| ENSP00000333568 | PRKD1        | 0.5105 |
| ENSP00000252115 | POLDIP3      | 0.5105 |
| ENSP00000219345 | PLA2G15      | 0.5105 |
| ENSP00000215904 | PDXP         | 0.5105 |
| ENSP00000355245 | PAX9         | 0.5105 |
| ENSP00000448059 | PAH          | 0.5105 |
| ENSP00000234111 | ODC1         | 0.5105 |
| ENSP00000310668 | NUP93        | 0.5105 |
| ENSP00000245544 | NUP85        | 0.5105 |
| ENSP00000353582 | NRP2         | 0.5105 |
| ENSP00000258317 | NPL          | 0.5105 |
| ENSP00000368190 | NPHS1        | 0.5105 |
| ENSP00000337383 | NLRP3        | 0.5105 |
| ENSP00000342828 | NKX2-3       | 0.5105 |
| ENSP00000232978 | NKTR         | 0.5105 |
| ENSP00000298310 | NEMF         | 0.5105 |
| ENSP00000362702 | NEK6         | 0.5105 |
| ENSP00000339720 | NDUFA4       | 0.5105 |
| ENSP00000348657 | NCAPG2       | 0.5105 |
| ENSP00000251496 | NCAPG        | 0.5105 |
| ENSP00000378288 | MYLK3        | 0.5105 |
| ENSP00000355206 | MT-ND3       | 0.5105 |
| ENSP00000355046 | MT-ND2       | 0.5105 |
| ENSP00000354525 | MRPL24       | 0.5105 |
| ENSP00000248248 | MON1B        | 0.5105 |
| ENSP00000256194 | MICAL2       | 0.5105 |
| ENSP00000243911 | MC3R         | 0.5105 |
| ENSP00000353508 | MAP2         | 0.5105 |
| ENSP00000256720 | LPIN1        | 0.5105 |
| ENSP00000266674 | LGR5         | 0.5105 |
| ENSP00000276590 | LACTB2       | 0.5105 |
| ENSP00000273963 | KLHL8        | 0.5105 |
| ENSP00000268919 | KIF2B        | 0.5105 |

|                 |              |        |
|-----------------|--------------|--------|
| ENSP00000324020 | KIF15        | 0.5105 |
| ENSP00000281156 | KHDRBS2      | 0.5105 |
| ENSP00000266719 | KERA         | 0.5105 |
| ENSP00000361473 | KDM4A        | 0.5105 |
| ENSP00000288309 | KCNJ6        | 0.5105 |
| ENSP00000256861 | ITIH5        | 0.5105 |
| ENSP00000312778 | IFT80        | 0.5105 |
| ENSP00000355672 | IBA57        | 0.5105 |
| ENSP00000261609 | HERC2        | 0.5105 |
| ENSP00000361245 | HECTD3       | 0.5105 |
| ENSP00000325290 | GSG2         | 0.5105 |
| ENSP00000329558 | GRPEL2       | 0.5105 |
| ENSP00000407375 | GPX1         | 0.5105 |
| ENSP00000355556 | GNG4         | 0.5105 |
| ENSP00000323901 | FZD2         | 0.5105 |
| ENSP00000351602 | FUT4         | 0.5105 |
| ENSP00000326948 | FTSJ1        | 0.5105 |
| ENSP00000216187 | FOXRED2      | 0.5105 |
| ENSP00000223136 | FIS1         | 0.5105 |
| ENSP00000413496 | FGF12        | 0.5105 |
| ENSP00000437464 | FBXL17       | 0.5105 |
| ENSP00000310842 | FANCI        | 0.5105 |
| ENSP00000404658 | EZH1         | 0.5105 |
| ENSP00000334675 | ERCC6L       | 0.5105 |
| ENSP00000356489 | EPM2A        | 0.5105 |
| ENSP00000272167 | EPHX1        | 0.5105 |
| ENSP00000393324 | EIF4E3       | 0.5105 |
| ENSP00000307080 | EGLN2        | 0.5105 |
| ENSP00000355601 | EGLN1        | 0.5105 |
| ENSP00000381167 | DYNC2H1      | 0.5105 |
| ENSP00000369129 | DSP          | 0.5105 |
| ENSP00000339850 | DPYSL4       | 0.5105 |
| ENSP00000254322 | DNAJB1       | 0.5105 |
| ENSP00000335304 | DLST         | 0.5105 |
| ENSP00000332258 | DGAT1        | 0.5105 |
| ENSP00000308344 | DCAF7        | 0.5105 |
| ENSP00000376776 | DBH          | 0.5105 |
| ENSP00000301141 | CYP2A6       | 0.5105 |
| ENSP00000224356 | CYP26A1      | 0.5105 |
| ENSP00000457656 | CYB5RL       | 0.5105 |
| ENSP00000463376 | CTC-479C5.12 | 0.5105 |
| ENSP00000378736 | CRCP         | 0.5105 |
| ENSP00000265394 | CPVL         | 0.5105 |
| ENSP00000265641 | CPT1A        | 0.5105 |
| ENSP00000229379 | COX6A1       | 0.5105 |
| ENSP00000355629 | COG2         | 0.5105 |
| ENSP00000355279 | CNOT7        | 0.5105 |
| ENSP00000358894 | CNNM2        | 0.5105 |
| ENSP00000327009 | CLIP4        | 0.5105 |
| ENSP00000254035 | CKMT2        | 0.5105 |
| ENSP00000322343 | CDK20        | 0.5105 |
| ENSP00000215574 | CDC34        | 0.5105 |
| ENSP00000246657 | CCR7         | 0.5105 |

|                 |          |        |
|-----------------|----------|--------|
| ENSP00000315743 | CCNG2    | 0.5105 |
| ENSP00000367832 | CCL7     | 0.5105 |
| ENSP00000251973 | CARD10   | 0.5105 |
| ENSP00000367608 | CA9      | 0.5105 |
| ENSP00000415941 | C4B      | 0.5105 |
| ENSP00000302079 | C3AR1    | 0.5105 |
| ENSP00000327336 | BGN      | 0.5105 |
| ENSP00000362441 | ATRX     | 0.5105 |
| ENSP00000285393 | ATP6V0D2 | 0.5105 |
| ENSP00000329757 | ATP6V0C  | 0.5105 |
| ENSP00000283290 | ATG3     | 0.5105 |
| ENSP00000311538 | ARR3     | 0.5105 |
| ENSP00000266503 | ARNTL2   | 0.5105 |
| ENSP00000264183 | ARID4B   | 0.5105 |
| ENSP00000386911 | ARHGAP25 | 0.5105 |
| ENSP00000300060 | ANPEP    | 0.5105 |
| ENSP00000303518 | ANKRD49  | 0.5105 |
| ENSP00000349957 | ANAPC11  | 0.5105 |
| ENSP00000273588 | AMT      | 0.5105 |
| ENSP00000252505 | ALLC     | 0.5105 |
| ENSP00000314649 | ALDH5A1  | 0.5105 |
| ENSP00000337736 | AKAP1    | 0.5105 |
| ENSP00000216479 | AHSA1    | 0.5105 |
| ENSP00000264167 | AGPS     | 0.5105 |
| ENSP00000294724 | AGL      | 0.5105 |
| ENSP00000296412 | ADH5     | 0.5105 |
| ENSP00000209668 | ADH1A    | 0.5105 |
| ENSP00000286355 | ADCY8    | 0.5105 |
| ENSP00000260600 | ADCY3    | 0.5105 |
| ENSP00000449535 | ACSS3    | 0.5105 |
| ENSP00000307697 | ACOX2    | 0.5105 |
| ENSP00000355637 | ABCB10   | 0.5105 |
| ENSP00000338190 | ABLIM1   | 0.5105 |
| ENSP00000338397 | NUDT2    | 0.5105 |
| ENSP00000311778 | ZMIZ2    | 0.5079 |
| ENSP00000364895 | ZBTB17   | 0.5079 |
| ENSP00000223369 | YKT6     | 0.5079 |
| ENSP00000301765 | VPS37C   | 0.5079 |
| ENSP00000220509 | VPS18    | 0.5079 |
| ENSP00000442436 | URI1     | 0.5079 |
| ENSP00000466420 | UQCR11   | 0.5079 |
| ENSP00000355343 | UBAP2L   | 0.5079 |
| ENSP00000248846 | TUBGCP6  | 0.5079 |
| ENSP00000368591 | TLL10    | 0.5079 |
| ENSP00000300181 | TSC22D4  | 0.5079 |
| ENSP00000379065 | TRPS1    | 0.5079 |
| ENSP00000219746 | TOX3     | 0.5079 |
| ENSP00000336783 | TNRC6C   | 0.5079 |
| ENSP00000330945 | TMED9    | 0.5079 |
| ENSP00000257245 | TIMM10   | 0.5079 |
| ENSP00000358089 | TIAL1    | 0.5079 |
| ENSP00000284240 | THY1     | 0.5079 |
| ENSP00000420616 | TFDP2    | 0.5079 |

|                 |                |        |
|-----------------|----------------|--------|
| ENSP00000444788 | TDO2           | 0.5079 |
| ENSP00000226444 | SULT1E1        | 0.5079 |
| ENSP00000075503 | STYK1          | 0.5079 |
| ENSP00000278742 | ST14           | 0.5079 |
| ENSP00000325905 | SRSF7          | 0.5079 |
| ENSP00000359119 | SRPK3          | 0.5079 |
| ENSP00000374372 | SPTB           | 0.5079 |
| ENSP00000353238 | SPN            | 0.5079 |
| ENSP00000320885 | SPAST          | 0.5079 |
| ENSP00000282470 | SPARCL1        | 0.5079 |
| ENSP00000421380 | SNF8           | 0.5079 |
| ENSP00000349823 | SMARCAL1       | 0.5079 |
| ENSP00000330320 | SLC9A7         | 0.5079 |
| ENSP00000217420 | SLC32A1        | 0.5079 |
| ENSP00000264784 | SLC2A9         | 0.5079 |
| ENSP00000364543 | SKIV2L         | 0.5079 |
| ENSP00000285116 | SKA1           | 0.5079 |
| ENSP00000356906 | SH2D1B         | 0.5079 |
| ENSP00000321853 | SERPINF2       | 0.5079 |
| ENSP00000333203 | SERPINA5       | 0.5079 |
| ENSP00000348822 | SEMA4D         | 0.5079 |
| ENSP00000382779 | SEH1L          | 0.5079 |
| ENSP00000456434 | SDHD           | 0.5079 |
| ENSP00000262878 | SAMHD1         | 0.5079 |
| ENSP00000298386 | RXFP2          | 0.5079 |
| ENSP00000250784 | RPS4Y1         | 0.5079 |
| ENSP00000202773 | RPL6           | 0.5079 |
| ENSP00000454786 | RP11-152F13.10 | 0.5079 |
| ENSP00000362578 | RNF8           | 0.5079 |
| ENSP00000360497 | RNF113A        | 0.5079 |
| ENSP00000289013 | RHPN1          | 0.5079 |
| ENSP00000235382 | RGS2           | 0.5079 |
| ENSP00000295802 | RETSAT         | 0.5079 |
| ENSP00000302088 | RER1           | 0.5079 |
| ENSP00000392423 | RELN           | 0.5079 |
| ENSP00000257895 | RDH5           | 0.5079 |
| ENSP00000425446 | RBM4           | 0.5079 |
| ENSP00000265562 | PTPN23         | 0.5079 |
| ENSP00000394794 | PTPN13         | 0.5079 |
| ENSP00000210313 | PSMD5          | 0.5079 |
| ENSP00000364016 | PSMB8          | 0.5079 |
| ENSP00000225174 | PPIF           | 0.5079 |
| ENSP00000393953 | PNPT1          | 0.5079 |
| ENSP00000326119 | PMAIP1         | 0.5079 |
| ENSP00000266505 | PLCZ1          | 0.5079 |
| ENSP00000380460 | PLAA           | 0.5079 |
| ENSP00000356436 | PLA2G4A        | 0.5079 |
| ENSP00000335333 | PIP5K1C        | 0.5079 |
| ENSP00000268043 | PIF1           | 0.5079 |
| ENSP00000379678 | PGM5           | 0.5079 |
| ENSP00000295266 | PDHA2          | 0.5079 |
| ENSP00000337500 | PCGF5          | 0.5079 |
| ENSP00000391453 | PARVG          | 0.5079 |

|                 |             |        |
|-----------------|-------------|--------|
| ENSP00000371419 | PARP4       | 0.5079 |
| ENSP00000260404 | PAK6        | 0.5079 |
| ENSP00000264883 | NUP54       | 0.5079 |
| ENSP00000219066 | NTHL1       | 0.5079 |
| ENSP00000354910 | NRG2        | 0.5079 |
| ENSP00000367407 | NMT2        | 0.5079 |
| ENSP00000376886 | NME1-NME2   | 0.5079 |
| ENSP00000259037 | NDUFB5      | 0.5079 |
| ENSP00000249299 | NAA38       | 0.5079 |
| ENSP00000288235 | MYO1E       | 0.5079 |
| ENSP00000347055 | MYL4        | 0.5079 |
| ENSP00000278888 | MS4A2       | 0.5079 |
| ENSP00000279242 | MRPL49      | 0.5079 |
| ENSP00000380318 | MPST        | 0.5079 |
| ENSP00000285814 | MKI67IP     | 0.5079 |
| ENSP00000274473 | MEGF10      | 0.5079 |
| ENSP00000258648 | MED4        | 0.5079 |
| ENSP00000365107 | MASTL       | 0.5079 |
| ENSP00000350195 | MAP3K6      | 0.5079 |
| ENSP00000260382 | LRRC49      | 0.5079 |
| ENSP00000244289 | LIPE        | 0.5079 |
| ENSP00000344401 | LIN28B      | 0.5079 |
| ENSP00000349393 | LIG4        | 0.5079 |
| ENSP00000215909 | LGALS1      | 0.5079 |
| ENSP00000272163 | LBR         | 0.5079 |
| ENSP00000424183 | LAMTOR3     | 0.5079 |
| ENSP00000362728 | KPNA6       | 0.5079 |
| ENSP00000355517 | KMO         | 0.5079 |
| ENSP00000356230 | KLHL12      | 0.5079 |
| ENSP00000385000 | KIF2A       | 0.5079 |
| ENSP00000263934 | KIF1B       | 0.5079 |
| ENSP00000367323 | KCNAB2      | 0.5079 |
| ENSP00000394085 | JMJD6       | 0.5079 |
| ENSP00000373854 | ITGAD       | 0.5079 |
| ENSP00000304915 | IL13        | 0.5079 |
| ENSP00000259874 | IER3        | 0.5079 |
| ENSP00000303766 | HTRA3       | 0.5079 |
| ENSP00000218364 | HTATSF1     | 0.5079 |
| ENSP00000295757 | HDAC11      | 0.5079 |
| ENSP00000423822 | GPX8        | 0.5079 |
| ENSP00000261837 | GNB5        | 0.5079 |
| ENSP00000271348 | GJA5        | 0.5079 |
| ENSP00000253462 | GIN52       | 0.5079 |
| ENSP00000261386 | GDE1        | 0.5079 |
| ENSP00000318177 | FUBP3       | 0.5079 |
| ENSP00000302707 | FPR1        | 0.5079 |
| ENSP00000450895 | FPGT-TNNI3K | 0.5079 |
| ENSP00000335677 | FOXK2       | 0.5079 |
| ENSP00000335493 | FOXD2       | 0.5079 |
| ENSP00000304004 | FOXA3       | 0.5079 |
| ENSP00000310935 | FKBP2       | 0.5079 |
| ENSP00000399324 | FGF16       | 0.5079 |
| ENSP00000462972 | FDXR        | 0.5079 |

|                 |          |        |
|-----------------|----------|--------|
| ENSP00000463576 | FAM230A  | 0.5079 |
| ENSP00000264344 | FAM13A   | 0.5079 |
| ENSP00000256104 | FABP4    | 0.5079 |
| ENSP00000374354 | EXOSC8   | 0.5079 |
| ENSP00000265564 | EXOSC7   | 0.5079 |
| ENSP00000384524 | ETV2     | 0.5079 |
| ENSP00000362139 | EPHA10   | 0.5079 |
| ENSP00000307235 | EIF2AK3  | 0.5079 |
| ENSP00000368927 | EIF1AX   | 0.5079 |
| ENSP00000268206 | EFTUD1   | 0.5079 |
| ENSP00000215368 | EFNA2    | 0.5079 |
| ENSP00000254730 | EEFSEC   | 0.5079 |
| ENSP00000263026 | EEF2K    | 0.5079 |
| ENSP00000382064 | DTNA     | 0.5079 |
| ENSP00000306129 | DRD5     | 0.5079 |
| ENSP00000436901 | DPF2     | 0.5079 |
| ENSP00000262375 | DNAJA3   | 0.5079 |
| ENSP00000365625 | DHX16    | 0.5079 |
| ENSP00000311899 | DAW1     | 0.5079 |
| ENSP00000230895 | DAP      | 0.5079 |
| ENSP00000299498 | CYB5R2   | 0.5079 |
| ENSP00000308430 | CYB5B    | 0.5079 |
| ENSP00000292174 | CXCR5    | 0.5079 |
| ENSP00000352544 | CPLX2    | 0.5079 |
| ENSP00000222271 | COMP     | 0.5079 |
| ENSP00000348385 | COL27A1  | 0.5079 |
| ENSP00000364140 | COL15A1  | 0.5079 |
| ENSP00000325506 | CLVS1    | 0.5079 |
| ENSP00000406577 | CKMT1A   | 0.5079 |
| ENSP00000262570 | CHCHD3   | 0.5079 |
| ENSP00000359300 | CETN2    | 0.5079 |
| ENSP00000283006 | CENPH    | 0.5079 |
| ENSP00000337358 | CECR5    | 0.5079 |
| ENSP00000234626 | CDC7     | 0.5079 |
| ENSP00000269385 | CBX8     | 0.5079 |
| ENSP00000376849 | CASP5    | 0.5079 |
| ENSP00000358147 | CACUL1   | 0.5079 |
| ENSP00000260210 | BUD13    | 0.5079 |
| ENSP00000306752 | BOLA2B   | 0.5079 |
| ENSP00000250405 | BCL2L2   | 0.5079 |
| ENSP00000376534 | BAZ2B    | 0.5079 |
| ENSP00000253413 | ATP6V1E1 | 0.5079 |
| ENSP00000318846 | ASCL3    | 0.5079 |
| ENSP00000368332 | ARX      | 0.5079 |
| ENSP00000366487 | ARL5B    | 0.5079 |
| ENSP00000323847 | ARL14    | 0.5079 |
| ENSP00000279873 | ARID5B   | 0.5079 |
| ENSP00000336923 | ARHGAP10 | 0.5079 |
| ENSP00000356969 | APOA2    | 0.5079 |
| ENSP00000347408 | AP3M1    | 0.5079 |
| ENSP00000369579 | ANKDD1A  | 0.5079 |
| ENSP00000394394 | ANAPC7   | 0.5079 |
| ENSP00000294517 | ADC      | 0.5079 |



|                 |          |        |
|-----------------|----------|--------|
| ENSP00000349396 | ABCD4    | 0.5079 |
| ENSP00000402835 | AARSD1   | 0.5079 |
| ENSP00000334474 | ZMIZ1    | 0.5053 |
| ENSP00000384434 | ZGLP1    | 0.5053 |
| ENSP00000261353 | YPEL5    | 0.5053 |
| ENSP00000362576 | YARS     | 0.5053 |
| ENSP00000366396 | XRN2     | 0.5053 |
| ENSP00000328671 | WDR4     | 0.5053 |
| ENSP00000326534 | VPS39    | 0.5053 |
| ENSP00000318629 | VPS37A   | 0.5053 |
| ENSP00000312029 | UCP2     | 0.5053 |
| ENSP00000363338 | UBXN11   | 0.5053 |
| ENSP00000380178 | UBE2G1   | 0.5053 |
| ENSP00000348838 | UBE2C    | 0.5053 |
| ENSP00000239587 | TTL2     | 0.5053 |
| ENSP00000303437 | TSNARE1  | 0.5053 |
| ENSP00000355991 | TRAF3IP3 | 0.5053 |
| ENSP00000216034 | TOMM22   | 0.5053 |
| ENSP00000376445 | TIRAP    | 0.5053 |
| ENSP00000265686 | TCIRG1   | 0.5053 |
| ENSP00000402935 | TBC1D5   | 0.5053 |
| ENSP00000348234 | TAT      | 0.5053 |
| ENSP00000217893 | TAF9     | 0.5053 |
| ENSP00000321106 | TAC1     | 0.5053 |
| ENSP00000216297 | SUPT16H  | 0.5053 |
| ENSP00000363054 | STX12    | 0.5053 |
| ENSP00000194530 | STRADB   | 0.5053 |
| ENSP00000378965 | SNTB1    | 0.5053 |
| ENSP00000272348 | SNRPG    | 0.5053 |
| ENSP00000244520 | SNRPC    | 0.5053 |
| ENSP00000406485 | SMTNL1   | 0.5053 |
| ENSP00000351947 | SMARCA1  | 0.5053 |
| ENSP00000415011 | SLC30A8  | 0.5053 |
| ENSP00000355968 | SLC30A1  | 0.5053 |
| ENSP00000230640 | SKIV2L2  | 0.5053 |
| ENSP00000296257 | SENP2    | 0.5053 |
| ENSP00000260130 | SDCBP    | 0.5053 |
| ENSP00000360569 | SCP2     | 0.5053 |
| ENSP00000316329 | SCD5     | 0.5053 |
| ENSP00000441823 | SALL3    | 0.5053 |
| ENSP00000273064 | RQCD1    | 0.5053 |
| ENSP00000287038 | RPL30    | 0.5053 |
| ENSP00000283646 | RPIA     | 0.5053 |
| ENSP00000380903 | ROBO3    | 0.5053 |
| ENSP00000360441 | RHOXF2   | 0.5053 |
| ENSP00000219551 | RHBDL1   | 0.5053 |
| ENSP00000365946 | RBM3     | 0.5053 |
| ENSP00000369218 | RBM17    | 0.5053 |
| ENSP00000264515 | RBBP5    | 0.5053 |
| ENSP00000338173 | PUM2     | 0.5053 |
| ENSP00000324122 | PRPF31   | 0.5053 |
| ENSP00000279387 | PPP4C    | 0.5053 |
| ENSP00000260970 | PPIG     | 0.5053 |

|                 |         |        |
|-----------------|---------|--------|
| ENSP00000313731 | PLCD3   | 0.5053 |
| ENSP00000316809 | PITPNA  | 0.5053 |
| ENSP00000298231 | PHOX2A  | 0.5053 |
| ENSP00000356047 | PFKFB2  | 0.5053 |
| ENSP00000379503 | PDP1    | 0.5053 |
| ENSP00000345502 | PDE4D   | 0.5053 |
| ENSP00000347689 | PDE4C   | 0.5053 |
| ENSP00000286063 | PDE11A  | 0.5053 |
| ENSP00000384700 | PAPOLB  | 0.5053 |
| ENSP00000298838 | PACSIN3 | 0.5053 |
| ENSP00000361914 | OXCT2   | 0.5053 |
| ENSP00000039007 | OTC     | 0.5053 |
| ENSP00000378504 | NXF3    | 0.5053 |
| ENSP00000281701 | NVL     | 0.5053 |
| ENSP00000318986 | NSUN3   | 0.5053 |
| ENSP00000345147 | NKX2-4  | 0.5053 |
| ENSP00000380781 | NFIX    | 0.5053 |
| ENSP00000356972 | NDUFS2  | 0.5053 |
| ENSP00000360492 | NDUFA1  | 0.5053 |
| ENSP00000263354 | NAPA    | 0.5053 |
| ENSP00000367428 | MS4A13  | 0.5053 |
| ENSP00000260302 | MMP13   | 0.5053 |
| ENSP00000279441 | MMP10   | 0.5053 |
| ENSP00000281928 | MED13L  | 0.5053 |
| ENSP00000385751 | MARK2   | 0.5053 |
| ENSP00000013125 | MAP4K5  | 0.5053 |
| ENSP00000451263 | MAP3K9  | 0.5053 |
| ENSP00000346151 | MAGI2   | 0.5053 |
| ENSP00000231751 | LTF     | 0.5053 |
| ENSP00000353826 | LONP1   | 0.5053 |
| ENSP00000393379 | KIF5C   | 0.5053 |
| ENSP00000363524 | KIF4A   | 0.5053 |
| ENSP00000160827 | KIF22   | 0.5053 |
| ENSP00000382770 | KCNU1   | 0.5053 |
| ENSP00000369042 | IPO7    | 0.5053 |
| ENSP00000380024 | ING4    | 0.5053 |
| ENSP00000326981 | IMP3    | 0.5053 |
| ENSP00000391826 | IGF2    | 0.5053 |
| ENSP00000390158 | HERC1   | 0.5053 |
| ENSP00000282058 | HAUS1   | 0.5053 |
| ENSP00000355316 | GRM3    | 0.5053 |
| ENSP00000360608 | GRIN1   | 0.5053 |
| ENSP00000366246 | GPC6    | 0.5053 |
| ENSP00000311876 | GNPDA1  | 0.5053 |
| ENSP00000363411 | GNG10   | 0.5053 |
| ENSP00000308622 | GLE1    | 0.5053 |
| ENSP00000384363 | GDPD3   | 0.5053 |
| ENSP00000359497 | GBP2    | 0.5053 |
| ENSP00000453129 | GALK2   | 0.5053 |
| ENSP00000262426 | FOXF1   | 0.5053 |
| ENSP00000377311 | FDX1L   | 0.5053 |
| ENSP00000304108 | FAM171B | 0.5053 |
| ENSP00000219368 | FA2H    | 0.5053 |

|                 |                |        |
|-----------------|----------------|--------|
| ENSP00000264870 | F13A1          | 0.5053 |
| ENSP00000252482 | EXOC3L2        | 0.5053 |
| ENSP00000426638 | ETFDH          | 0.5053 |
| ENSP00000414378 | EFNA4          | 0.5053 |
| ENSP00000364028 | ECE1           | 0.5053 |
| ENSP00000354859 | DRD2           | 0.5053 |
| ENSP00000377523 | DQX1           | 0.5053 |
| ENSP00000276651 | DPYS           | 0.5053 |
| ENSP00000285311 | DKK2           | 0.5053 |
| ENSP00000331907 | DHX34          | 0.5053 |
| ENSP00000347717 | DHCR7          | 0.5053 |
| ENSP00000360316 | DHCR24         | 0.5053 |
| ENSP00000241051 | DEPDC7         | 0.5053 |
| ENSP00000392762 | DCT            | 0.5053 |
| ENSP00000366466 | CTNNBIP1       | 0.5053 |
| ENSP00000198765 | CPNE3          | 0.5053 |
| ENSP00000258654 | COG3           | 0.5053 |
| ENSP00000279463 | CNTN5          | 0.5053 |
| ENSP00000302569 | CLEC7A         | 0.5053 |
| ENSP00000288861 | CIB4           | 0.5053 |
| ENSP00000261007 | CHRNA1         | 0.5053 |
| ENSP00000251363 | CERS4          | 0.5053 |
| ENSP00000388566 | CASP4          | 0.5053 |
| ENSP00000360797 | CARD9          | 0.5053 |
| ENSP00000347005 | C7orf55-LUC7L2 | 0.5053 |
| ENSP00000313967 | C1QB           | 0.5053 |
| ENSP00000306477 | BTD            | 0.5053 |
| ENSP00000283147 | BMP6           | 0.5053 |
| ENSP00000318799 | BHLHE22        | 0.5053 |
| ENSP00000323099 | ATRIP          | 0.5053 |
| ENSP00000292475 | ATP5J2         | 0.5053 |
| ENSP00000358737 | ATP5F1         | 0.5053 |
| ENSP00000263519 | ATP2B3         | 0.5053 |
| ENSP00000358159 | ASCC3          | 0.5053 |
| ENSP00000368994 | ARHGAP44       | 0.5053 |
| ENSP00000361027 | AMOT           | 0.5053 |
| ENSP00000329117 | AMER1          | 0.5053 |
| ENSP00000295463 | ALPI           | 0.5053 |
| ENSP00000255084 | ALDH3B2        | 0.5053 |
| ENSP00000225740 | ALDH3A1        | 0.5053 |
| ENSP00000309259 | ALAS1          | 0.5053 |
| ENSP00000386284 | ALAD           | 0.5053 |
| ENSP00000229335 | AICDA          | 0.5053 |
| ENSP00000301732 | ABCA3          | 0.5053 |
| ENSP00000443824 | ZNRF3          | 0.5026 |
| ENSP00000400113 | ZDHHC13        | 0.5026 |
| ENSP00000338788 | ZC3H15         | 0.5026 |
| ENSP00000282007 | ZC3H13         | 0.5026 |
| ENSP00000366098 | YIF1A          | 0.5026 |
| ENSP00000401859 | YAF2           | 0.5026 |
| ENSP00000360147 | XPNPEP2        | 0.5026 |
| ENSP00000296490 | WDR82          | 0.5026 |
| ENSP00000324636 | VRK3           | 0.5026 |

|                 |          |        |
|-----------------|----------|--------|
| ENSP00000313811 | USP20    | 0.5026 |
| ENSP00000263966 | USP13    | 0.5026 |
| ENSP00000354201 | UBE2Z    | 0.5026 |
| ENSP00000366249 | UBD      | 0.5026 |
| ENSP00000364591 | TSPYL2   | 0.5026 |
| ENSP00000339804 | TSLP     | 0.5026 |
| ENSP00000302801 | TRMT61B  | 0.5026 |
| ENSP00000366729 | TNFRSF9  | 0.5026 |
| ENSP00000350965 | TMBIM4   | 0.5026 |
| ENSP00000450607 | TIMELESS | 0.5026 |
| ENSP00000355896 | TGFB2    | 0.5026 |
| ENSP00000262715 | TEP1     | 0.5026 |
| ENSP00000313886 | TCEANC   | 0.5026 |
| ENSP00000298630 | STK32C   | 0.5026 |
| ENSP00000360922 | STAU1    | 0.5026 |
| ENSP00000305230 | SRP9     | 0.5026 |
| ENSP00000295050 | SPRTN    | 0.5026 |
| ENSP00000310620 | SNX32    | 0.5026 |
| ENSP00000363349 | SNX30    | 0.5026 |
| ENSP00000311837 | SNTG2    | 0.5026 |
| ENSP00000246071 | SNRPB2   | 0.5026 |
| ENSP00000412566 | SNRPB    | 0.5026 |
| ENSP00000346762 | SND1     | 0.5026 |
| ENSP00000338606 | SMUG1    | 0.5026 |
| ENSP00000286398 | SMC2     | 0.5026 |
| ENSP00000298681 | SLC39A2  | 0.5026 |
| ENSP00000461324 | SLC25A10 | 0.5026 |
| ENSP00000270162 | SIK1     | 0.5026 |
| ENSP00000442518 | SHANK3   | 0.5026 |
| ENSP00000422168 | SH3BP2   | 0.5026 |
| ENSP00000381992 | SEPT7    | 0.5026 |
| ENSP00000296504 | SAP30    | 0.5026 |
| ENSP00000346045 | RPS17    | 0.5026 |
| ENSP00000270625 | RPS11    | 0.5026 |
| ENSP00000346012 | RPL36AL  | 0.5026 |
| ENSP00000393393 | RPL35A   | 0.5026 |
| ENSP00000378160 | RPL34    | 0.5026 |
| ENSP00000378782 | QPR1     | 0.5026 |
| ENSP00000434359 | PUF60    | 0.5026 |
| ENSP00000412788 | PTBP2    | 0.5026 |
| ENSP00000377384 | PSMC3IP  | 0.5026 |
| ENSP00000318602 | PRTFDC1  | 0.5026 |
| ENSP00000296223 | POLR2H   | 0.5026 |
| ENSP00000308937 | PMP22    | 0.5026 |
| ENSP00000358696 | PLXNA3   | 0.5026 |
| ENSP00000364252 | PLA2G2A  | 0.5026 |
| ENSP00000245255 | PIWIL1   | 0.5026 |
| ENSP00000359665 | PI4K2A   | 0.5026 |
| ENSP00000330918 | PGP      | 0.5026 |
| ENSP00000270776 | PGD      | 0.5026 |
| ENSP00000309548 | PDP2     | 0.5026 |
| ENSP00000334319 | PCLO     | 0.5026 |
| ENSP00000334008 | PARVA    | 0.5026 |

|                 |         |        |
|-----------------|---------|--------|
| ENSP00000453403 | NUSAP1  | 0.5026 |
| ENSP00000357480 | NUS1    | 0.5026 |
| ENSP00000420267 | NR6A1   | 0.5026 |
| ENSP00000382392 | NOP2    | 0.5026 |
| ENSP00000332198 | NOP10   | 0.5026 |
| ENSP00000296684 | NDUFS4  | 0.5026 |
| ENSP00000330737 | NDUFA12 | 0.5026 |
| ENSP00000366225 | NAPB    | 0.5026 |
| ENSP00000325239 | MYLPF   | 0.5026 |
| ENSP00000402038 | MTO1    | 0.5026 |
| ENSP00000223324 | MRPL32  | 0.5026 |
| ENSP00000377252 | MON2    | 0.5026 |
| ENSP00000370880 | MLANA   | 0.5026 |
| ENSP00000267812 | MFAP1   | 0.5026 |
| ENSP00000255764 | MED10   | 0.5026 |
| ENSP00000403946 | MBTD1   | 0.5026 |
| ENSP00000310933 | MADD    | 0.5026 |
| ENSP00000348762 | LSS     | 0.5026 |
| ENSP00000410758 | LSM5    | 0.5026 |
| ENSP00000355963 | LPGAT1  | 0.5026 |
| ENSP00000356257 | LMOD1   | 0.5026 |
| ENSP00000155840 | KCNQ1   | 0.5026 |
| ENSP00000263087 | ITGAE   | 0.5026 |
| ENSP00000249842 | ISLR    | 0.5026 |
| ENSP00000364929 | ING1    | 0.5026 |
| ENSP00000262345 | IL12RB2 | 0.5026 |
| ENSP00000412237 | IL10    | 0.5026 |
| ENSP00000317980 | IGSF9B  | 0.5026 |
| ENSP00000356713 | IFNGR1  | 0.5026 |
| ENSP00000263043 | ICK     | 0.5026 |
| ENSP00000160262 | ICAM3   | 0.5026 |
| ENSP00000285667 | HSPA13  | 0.5026 |
| ENSP00000297679 | HSD3B7  | 0.5026 |
| ENSP00000304226 | HIPK3   | 0.5026 |
| ENSP00000312042 | HDLBP   | 0.5026 |
| ENSP00000366620 | H6PD    | 0.5026 |
| ENSP00000373730 | H2AFJ   | 0.5026 |
| ENSP00000053867 | GRN     | 0.5026 |
| ENSP00000264426 | GRIA2   | 0.5026 |
| ENSP00000263915 | GRB14   | 0.5026 |
| ENSP00000442770 | GPN3    | 0.5026 |
| ENSP00000226413 | GNRHR   | 0.5026 |
| ENSP00000309092 | GMPPB   | 0.5026 |
| ENSP00000321706 | GEMIN4  | 0.5026 |
| ENSP00000378890 | GCH1    | 0.5026 |
| ENSP00000371110 | GCAT    | 0.5026 |
| ENSP00000350928 | GAD1    | 0.5026 |
| ENSP00000357158 | FCRL1   | 0.5026 |
| ENSP00000298047 | FAT3    | 0.5026 |
| ENSP00000218099 | F9      | 0.5026 |
| ENSP00000398597 | EXOSC6  | 0.5026 |
| ENSP00000225371 | EPX     | 0.5026 |
| ENSP00000438095 | ELOVL5  | 0.5026 |

|                 |          |        |
|-----------------|----------|--------|
| ENSP00000216190 | EIF3D    | 0.5026 |
| ENSP00000356076 | DYRK3    | 0.5026 |
| ENSP00000288943 | DUSP2    | 0.5026 |
| ENSP00000384084 | DTNB     | 0.5026 |
| ENSP00000346142 | DPAGT1   | 0.5026 |
| ENSP00000221403 | DHDH     | 0.5026 |
| ENSP00000374574 | DDX42    | 0.5026 |
| ENSP00000344989 | DALRD3   | 0.5026 |
| ENSP00000369050 | CYP1A1   | 0.5026 |
| ENSP00000444856 | CUL2     | 0.5026 |
| ENSP00000217131 | CTSZ     | 0.5026 |
| ENSP00000356954 | CTGF     | 0.5026 |
| ENSP00000356016 | CR1      | 0.5026 |
| ENSP00000386104 | CPE      | 0.5026 |
| ENSP00000330633 | CNTN2    | 0.5026 |
| ENSP00000312995 | CLSPN    | 0.5026 |
| ENSP00000376306 | CIT      | 0.5026 |
| ENSP00000246006 | CD93     | 0.5026 |
| ENSP00000227155 | CD82     | 0.5026 |
| ENSP00000317214 | CAPN6    | 0.5026 |
| ENSP00000365441 | CACNA1F  | 0.5026 |
| ENSP00000358146 | BOLA1    | 0.5026 |
| ENSP00000376946 | BBS10    | 0.5026 |
| ENSP00000415822 | ATXN1L   | 0.5026 |
| ENSP00000417378 | ATP6V1F  | 0.5026 |
| ENSP00000256031 | ATP13A3  | 0.5026 |
| ENSP00000311766 | ATAD3B   | 0.5026 |
| ENSP00000356992 | ARHGAP30 | 0.5026 |
| ENSP00000254584 | ARFIP2   | 0.5026 |
| ENSP00000261733 | ALDH2    | 0.5026 |
| ENSP00000379138 | AFP      | 0.5026 |
| ENSP00000294016 | ADCY9    | 0.5026 |
| ENSP00000419361 | ADCY5    | 0.5026 |
| ENSP00000237283 | ADAT2    | 0.5026 |
| ENSP00000271643 | ADAMTSL4 | 0.5026 |
| ENSP00000243349 | ACVR1C   | 0.5026 |
| ENSP00000188312 | ACTR6    | 0.5026 |
| ENSP00000348775 | ACOX3    | 0.5026 |
| ENSP00000281182 | ACAD8    | 0.5026 |
| ENSP00000365725 | ABHD12   | 0.5026 |
| ENSP00000273359 | ABHD10   | 0.5026 |
| ENSP00000205557 | ABCC6    | 0.5026 |
| ENSP00000359478 | ABCC2    | 0.5026 |
| ENSP00000265316 | ABCB6    | 0.5026 |
| ENSP00000268251 | ABAT     | 0.5026 |
| ENSP00000387841 | MRRFP1   | 0.5026 |
| ENSP00000421566 | XPNPEP1  | 0.5000 |
| ENSP00000262144 | WDR59    | 0.5000 |
| ENSP00000376792 | VTI1A    | 0.5000 |
| ENSP00000311245 | USMG5    | 0.5000 |
| ENSP00000276893 | UHRF2    | 0.5000 |
| ENSP00000263228 | UBE2R2   | 0.5000 |
| ENSP00000323687 | UBE2O    | 0.5000 |

|                 |          |        |
|-----------------|----------|--------|
| ENSP00000338348 | UBE2G2   | 0.5000 |
| ENSP00000269601 | TXNL4A   | 0.5000 |
| ENSP00000363641 | TXN      | 0.5000 |
| ENSP00000367743 | TSPAN7   | 0.5000 |
| ENSP00000262213 | TRAM1    | 0.5000 |
| ENSP00000431872 | TPT1     | 0.5000 |
| ENSP00000354842 | TOX      | 0.5000 |
| ENSP00000347948 | TNFRSF14 | 0.5000 |
| ENSP00000297632 | TMEM65   | 0.5000 |
| ENSP00000258412 | TMBIM1   | 0.5000 |
| ENSP00000270538 | TIMM44   | 0.5000 |
| ENSP00000416330 | TGFBI    | 0.5000 |
| ENSP00000430690 | TFF3     | 0.5000 |
| ENSP00000387303 | TDRD9    | 0.5000 |
| ENSP00000321259 | TALDO1   | 0.5000 |
| ENSP00000263033 | SYTL4    | 0.5000 |
| ENSP00000221283 | STXBP2   | 0.5000 |
| ENSP00000356918 | STX7     | 0.5000 |
| ENSP00000320679 | STX19    | 0.5000 |
| ENSP00000375777 | STRN4    | 0.5000 |
| ENSP00000291386 | SSU72    | 0.5000 |
| ENSP00000424870 | SRP19    | 0.5000 |
| ENSP00000267884 | SRP14    | 0.5000 |
| ENSP00000311489 | SPTBN2   | 0.5000 |
| ENSP00000355354 | SOX15    | 0.5000 |
| ENSP00000306223 | SNRPN    | 0.5000 |
| ENSP00000337125 | SMEK1    | 0.5000 |
| ENSP00000306627 | SLC9C1   | 0.5000 |
| ENSP00000379834 | SLC2A14  | 0.5000 |
| ENSP00000377771 | SIPA1    | 0.5000 |
| ENSP00000398704 | SHOX2    | 0.5000 |
| ENSP00000403712 | SENP3    | 0.5000 |
| ENSP00000265362 | SEMA3A   | 0.5000 |
| ENSP00000251170 | SEC14L5  | 0.5000 |
| ENSP00000368411 | SCNN1D   | 0.5000 |
| ENSP00000357708 | S100A6   | 0.5000 |
| ENSP00000301336 | RILP     | 0.5000 |
| ENSP00000451030 | RGS6     | 0.5000 |
| ENSP00000319308 | RGS5     | 0.5000 |
| ENSP00000356430 | RGS18    | 0.5000 |
| ENSP00000265881 | REXO2    | 0.5000 |
| ENSP00000261973 | RBM25    | 0.5000 |
| ENSP00000361043 | RAD54L   | 0.5000 |
| ENSP00000281273 | QTRTD1   | 0.5000 |
| ENSP00000295718 | PTPRN    | 0.5000 |
| ENSP00000298942 | PTER     | 0.5000 |
| ENSP00000329127 | PRKCH    | 0.5000 |
| ENSP00000417963 | PPP2R5D  | 0.5000 |
| ENSP00000164133 | PPP2R5B  | 0.5000 |
| ENSP00000202556 | PPP1R13B | 0.5000 |
| ENSP00000286719 | PPEF2    | 0.5000 |
| ENSP00000265465 | POLA2    | 0.5000 |
| ENSP00000346810 | PLAGL1   | 0.5000 |

|                 |          |        |
|-----------------|----------|--------|
| ENSP00000291906 | PKN3     | 0.5000 |
| ENSP00000349465 | PICK1    | 0.5000 |
| ENSP00000243052 | PDE1B    | 0.5000 |
| ENSP00000335062 | PDCD1    | 0.5000 |
| ENSP00000292823 | PCYT1A   | 0.5000 |
| ENSP00000365462 | PCCA     | 0.5000 |
| ENSP00000396995 | PAPD5    | 0.5000 |
| ENSP00000234961 | OPRD1    | 0.5000 |
| ENSP00000426978 | NXF5     | 0.5000 |
| ENSP00000345895 | NUP50    | 0.5000 |
| ENSP00000268533 | NUDT7    | 0.5000 |
| ENSP00000337773 | NQO2     | 0.5000 |
| ENSP00000382834 | NPRL3    | 0.5000 |
| ENSP00000264663 | NNT      | 0.5000 |
| ENSP00000442308 | NKRF     | 0.5000 |
| ENSP00000215956 | NHP2L1   | 0.5000 |
| ENSP00000344786 | NFASC    | 0.5000 |
| ENSP00000309899 | NARF     | 0.5000 |
| ENSP00000210444 | NANS     | 0.5000 |
| ENSP00000437073 | MYO18A   | 0.5000 |
| ENSP00000316950 | MYEF2    | 0.5000 |
| ENSP00000354813 | MT-ND5   | 0.5000 |
| ENSP00000354687 | MT-ND1   | 0.5000 |
| ENSP00000355692 | MRPL55   | 0.5000 |
| ENSP00000300151 | MRPL16   | 0.5000 |
| ENSP00000362282 | MOCS1    | 0.5000 |
| ENSP00000379364 | MOB1A    | 0.5000 |
| ENSP00000261245 | MNAT1    | 0.5000 |
| ENSP00000361064 | MINPP1   | 0.5000 |
| ENSP00000315152 | METAP1D  | 0.5000 |
| ENSP00000296411 | METAP1   | 0.5000 |
| ENSP00000356070 | MAPKAPK2 | 0.5000 |
| ENSP00000294066 | MAP4K2   | 0.5000 |
| ENSP00000261921 | LOXL1    | 0.5000 |
| ENSP00000365159 | ISCA1    | 0.5000 |
| ENSP00000242208 | INHBA    | 0.5000 |
| ENSP00000387262 | IMMT     | 0.5000 |
| ENSP00000396301 | IK       | 0.5000 |
| ENSP00000384886 | IFI30    | 0.5000 |
| ENSP00000303599 | HSFY1    | 0.5000 |
| ENSP00000305632 | HOMER2   | 0.5000 |
| ENSP00000265866 | HNRNPH3  | 0.5000 |
| ENSP00000381654 | HMGCLL1  | 0.5000 |
| ENSP00000338387 | HLCS     | 0.5000 |
| ENSP00000353472 | HLA-G    | 0.5000 |
| ENSP00000277903 | HABP2    | 0.5000 |
| ENSP00000381607 | GSTP1    | 0.5000 |
| ENSP00000362656 | GOLGA1   | 0.5000 |
| ENSP00000295448 | GNPDA2   | 0.5000 |
| ENSP00000361894 | GNMT     | 0.5000 |
| ENSP00000248150 | GNG13    | 0.5000 |
| ENSP00000266659 | GLIPR1   | 0.5000 |
| ENSP00000372295 | GJB2     | 0.5000 |



|                 |         |        |
|-----------------|---------|--------|
| ENSP00000338964 | GGT7    | 0.5000 |
| ENSP00000359258 | GCLM    | 0.5000 |
| ENSP00000359804 | FUBP1   | 0.5000 |
| ENSP00000329219 | FMNL1   | 0.5000 |
| ENSP00000364475 | FBP1    | 0.5000 |
| ENSP00000361433 | EXOSC2  | 0.5000 |
| ENSP00000379042 | ERO1L   | 0.5000 |
| ENSP00000276461 | ERLIN2  | 0.5000 |
| ENSP00000185150 | ERLEC1  | 0.5000 |
| ENSP00000332118 | EPHB3   | 0.5000 |
| ENSP00000354125 | EIF3B   | 0.5000 |
| ENSP00000327116 | EHD3    | 0.5000 |
| ENSP00000256497 | EDEM1   | 0.5000 |
| ENSP00000258443 | EDAR    | 0.5000 |
| ENSP00000356130 | DSTYK   | 0.5000 |
| ENSP00000273075 | DNPEP   | 0.5000 |
| ENSP00000406463 | DNAJC7  | 0.5000 |
| ENSP00000378605 | DNAJC30 | 0.5000 |
| ENSP00000366800 | DNAJC11 | 0.5000 |
| ENSP00000366179 | DNAJC1  | 0.5000 |
| ENSP00000359799 | DNAJB4  | 0.5000 |
| ENSP00000386770 | DNAH10  | 0.5000 |
| ENSP00000266070 | DIDO1   | 0.5000 |
| ENSP00000251241 | DHX40   | 0.5000 |
| ENSP00000251636 | DHX29   | 0.5000 |
| ENSP00000288490 | DGKI    | 0.5000 |
| ENSP00000328405 | DGKA    | 0.5000 |
| ENSP00000359361 | DDX43   | 0.5000 |
| ENSP00000355185 | DCLRE1A | 0.5000 |
| ENSP00000390475 | CXXC1   | 0.5000 |
| ENSP00000354901 | CXCL9   | 0.5000 |
| ENSP00000364589 | CUL4A   | 0.5000 |
| ENSP00000321732 | CTDNEP1 | 0.5000 |
| ENSP00000343746 | CORO2A  | 0.5000 |
| ENSP00000261401 | CORO1C  | 0.5000 |
| ENSP00000333946 | COQ6    | 0.5000 |
| ENSP00000263960 | COQ10B  | 0.5000 |
| ENSP00000295550 | COL6A3  | 0.5000 |
| ENSP00000325146 | COL12A1 | 0.5000 |
| ENSP00000387122 | CLEC16A | 0.5000 |
| ENSP00000317468 | CHMP6   | 0.5000 |
| ENSP00000256443 | CDK7    | 0.5000 |
| ENSP00000462701 | CDH8    | 0.5000 |
| ENSP00000267383 | CDH24   | 0.5000 |
| ENSP00000256447 | CD180   | 0.5000 |
| ENSP00000377958 | CCT4    | 0.5000 |
| ENSP00000282572 | CCNO    | 0.5000 |
| ENSP00000004921 | CCL18   | 0.5000 |
| ENSP00000265164 | CASP6   | 0.5000 |
| ENSP00000424038 | CASP12  | 0.5000 |
| ENSP00000310649 | BRSK1   | 0.5000 |
| ENSP00000217169 | BIRC7   | 0.5000 |
| ENSP00000245157 | BBS2    | 0.5000 |

|                 |            |        |
|-----------------|------------|--------|
| ENSP00000332247 | ATP6V0A2   | 0.5000 |
| ENSP00000316854 | ATOX1      | 0.5000 |
| ENSP00000329212 | ATF7       | 0.5000 |
| ENSP00000368030 | ATAD3A     | 0.5000 |
| ENSP00000353210 | ARL9       | 0.5000 |
| ENSP00000260746 | ARL3       | 0.5000 |
| ENSP00000282032 | ARL14EP    | 0.5000 |
| ENSP00000276211 | ARHGAP36   | 0.5000 |
| ENSP00000263245 | ARFGAP3    | 0.5000 |
| ENSP00000434442 | ARFGAP2    | 0.5000 |
| ENSP00000199280 | AQP2       | 0.5000 |
| ENSP00000083182 | APPBP2     | 0.5000 |
| ENSP00000265381 | APBA1      | 0.5000 |
| ENSP00000448165 | APAF1      | 0.5000 |
| ENSP00000344055 | AP3D1      | 0.5000 |
| ENSP00000341662 | AGMO       | 0.5000 |
| ENSP00000364986 | AGMAT      | 0.5000 |
| ENSP00000312262 | ADRBK1     | 0.5000 |
| ENSP00000443189 | AC073610.5 | 0.5000 |
| ENSP00000310688 | ABCD2      | 0.5000 |
| ENSP00000327652 | DRD1       | 0.5000 |
| ENSP00000331111 | ZNRD1      | 0.4974 |
| ENSP00000311679 | ZNF483     | 0.4974 |
| ENSP00000343557 | ZCCHC17    | 0.4974 |
| ENSP00000326813 | YOD1       | 0.4974 |
| ENSP00000274496 | YIPF5      | 0.4974 |
| ENSP00000320658 | YARS2      | 0.4974 |
| ENSP00000235090 | WDR77      | 0.4974 |
| ENSP00000339449 | WDR16      | 0.4974 |
| ENSP00000347495 | WARS       | 0.4974 |
| ENSP00000357887 | VPS72      | 0.4974 |
| ENSP00000440594 | VNN3       | 0.4974 |
| ENSP00000322276 | VNN2       | 0.4974 |
| ENSP00000415434 | USP40      | 0.4974 |
| ENSP00000363397 | UGCG       | 0.4974 |
| ENSP00000296786 | UBLCP1     | 0.4974 |
| ENSP00000451261 | UBE2J1     | 0.4974 |
| ENSP00000281741 | TXNDC16    | 0.4974 |
| ENSP00000369784 | TUBAL3     | 0.4974 |
| ENSP00000392252 | TLL8       | 0.4974 |
| ENSP00000333920 | TTF1       | 0.4974 |
| ENSP00000247829 | TSPAN8     | 0.4974 |
| ENSP00000362936 | TRNAU1AP   | 0.4974 |
| ENSP00000252487 | TOMM40     | 0.4974 |
| ENSP00000368818 | TOM1L2     | 0.4974 |
| ENSP00000252898 | TNNI2      | 0.4974 |
| ENSP00000248244 | TICAM1     | 0.4974 |
| ENSP00000355751 | THBS2      | 0.4974 |
| ENSP00000367440 | TDP2       | 0.4974 |
| ENSP00000326550 | TACC3      | 0.4974 |
| ENSP00000319104 | SUPT6H     | 0.4974 |
| ENSP00000305810 | STX18      | 0.4974 |
| ENSP00000373684 | STK38L     | 0.4974 |

|                 |         |        |
|-----------------|---------|--------|
| ENSP00000276449 | STAR    | 0.4974 |
| ENSP00000274008 | SPATA5  | 0.4974 |
| ENSP00000348984 | SON     | 0.4974 |
| ENSP00000262418 | SLC4A1  | 0.4974 |
| ENSP00000359174 | SLC35A3 | 0.4974 |
| ENSP00000348019 | SLC17A5 | 0.4974 |
| ENSP00000216513 | SIX4    | 0.4974 |
| ENSP00000292055 | SIK3    | 0.4974 |
| ENSP00000246104 | SCRT2   | 0.4974 |
| ENSP00000255390 | SCO1    | 0.4974 |
| ENSP00000328968 | SCN5A   | 0.4974 |
| ENSP00000228284 | SART3   | 0.4974 |
| ENSP00000358423 | RRAGD   | 0.4974 |
| ENSP00000307272 | RPTOR   | 0.4974 |
| ENSP00000472469 | RPS28   | 0.4974 |
| ENSP00000346046 | RPS17L  | 0.4974 |
| ENSP00000296277 | RPL39L  | 0.4974 |
| ENSP00000346015 | RPL27A  | 0.4974 |
| ENSP00000257575 | RNFT2   | 0.4974 |
| ENSP00000417895 | RASA4B  | 0.4974 |
| ENSP00000246194 | RALY    | 0.4974 |
| ENSP00000250237 | QTRT1   | 0.4974 |
| ENSP00000254667 | PTPRE   | 0.4974 |
| ENSP00000293362 | PSME3   | 0.4974 |
| ENSP00000417659 | PPM1L   | 0.4974 |
| ENSP00000392257 | PPIL6   | 0.4974 |
| ENSP00000390427 | PPIL2   | 0.4974 |
| ENSP00000241436 | POLK    | 0.4974 |
| ENSP00000458021 | PMF1    | 0.4974 |
| ENSP00000305152 | PLP1    | 0.4974 |
| ENSP00000466248 | PLK5    | 0.4974 |
| ENSP00000274289 | PLK2    | 0.4974 |
| ENSP00000297540 | PHAX    | 0.4974 |
| ENSP00000292357 | PEAR1   | 0.4974 |
| ENSP00000323313 | PDIA5   | 0.4974 |
| ENSP00000376506 | PDCD10  | 0.4974 |
| ENSP00000263556 | P4HA1   | 0.4974 |
| ENSP00000419740 | NSUN4   | 0.4974 |
| ENSP00000376889 | NME2    | 0.4974 |
| ENSP00000307525 | NMD3    | 0.4974 |
| ENSP00000356988 | NIT1    | 0.4974 |
| ENSP00000362058 | NDUFS5  | 0.4974 |
| ENSP00000293404 | NAGS    | 0.4974 |
| ENSP00000037502 | MYOC    | 0.4974 |
| ENSP00000331152 | MXI1    | 0.4974 |
| ENSP00000436812 | MUC5B   | 0.4974 |
| ENSP00000370508 | MTIF3   | 0.4974 |
| ENSP00000364855 | MSH5    | 0.4974 |
| ENSP00000276585 | MRPS28  | 0.4974 |
| ENSP00000252602 | MRPL34  | 0.4974 |
| ENSP00000355583 | MLK4    | 0.4974 |
| ENSP00000342924 | MCPH1   | 0.4974 |
| ENSP00000383234 | MAPK4   | 0.4974 |

|                 |           |        |
|-----------------|-----------|--------|
| ENSP00000385450 | MAGI1     | 0.4974 |
| ENSP00000376048 | MAG       | 0.4974 |
| ENSP00000302160 | LSM3      | 0.4974 |
| ENSP00000362354 | LPIN3     | 0.4974 |
| ENSP00000329102 | LIN9      | 0.4974 |
| ENSP00000336740 | LIMK1     | 0.4974 |
| ENSP00000226299 | LAP3      | 0.4974 |
| ENSP00000310878 | KLF14     | 0.4974 |
| ENSP00000264501 | KIAA1109  | 0.4974 |
| ENSP00000302719 | KCNAB3    | 0.4974 |
| ENSP00000419952 | KCNAB1    | 0.4974 |
| ENSP00000351190 | ITIH2     | 0.4974 |
| ENSP00000307183 | ING2      | 0.4974 |
| ENSP00000295666 | IGFBP7    | 0.4974 |
| ENSP00000232003 | HRG       | 0.4974 |
| ENSP00000380785 | HOOK2     | 0.4974 |
| ENSP00000349430 | HIST1H2BK | 0.4974 |
| ENSP00000362674 | HDAC8     | 0.4974 |
| ENSP00000222574 | HBP1      | 0.4974 |
| ENSP00000338082 | HBG2      | 0.4974 |
| ENSP00000333994 | HBB       | 0.4974 |
| ENSP00000304440 | HAS3      | 0.4974 |
| ENSP00000216410 | GNPNAT1   | 0.4974 |
| ENSP00000377665 | GAPVD1    | 0.4974 |
| ENSP00000274547 | GABRB2    | 0.4974 |
| ENSP00000350170 | FXR1      | 0.4974 |
| ENSP00000347041 | FMOD      | 0.4974 |
| ENSP00000230124 | FIG4      | 0.4974 |
| ENSP00000394487 | FGD4      | 0.4974 |
| ENSP00000356936 | FCRLA     | 0.4974 |
| ENSP00000281623 | FBXO4     | 0.4974 |
| ENSP00000405738 | ESRP1     | 0.4974 |
| ENSP00000222329 | ERF       | 0.4974 |
| ENSP00000350896 | EPHB4     | 0.4974 |
| ENSP00000231887 | EHHADH    | 0.4974 |
| ENSP00000226091 | EFNB3     | 0.4974 |
| ENSP00000360577 | ECHDC2    | 0.4974 |
| ENSP00000323275 | DYX1C1    | 0.4974 |
| ENSP00000302936 | DYNLRB2   | 0.4974 |
| ENSP00000452398 | DUXA      | 0.4974 |
| ENSP00000355866 | DUSP10    | 0.4974 |
| ENSP00000383303 | DSCAM     | 0.4974 |
| ENSP00000382104 | DOPEY2    | 0.4974 |
| ENSP00000256935 | DOCK2     | 0.4974 |
| ENSP00000382260 | DGKB      | 0.4974 |
| ENSP00000158771 | DERL2     | 0.4974 |
| ENSP00000417748 | DDI2      | 0.4974 |
| ENSP00000358576 | DCLRE1B   | 0.4974 |
| ENSP00000299441 | DCHS1     | 0.4974 |
| ENSP00000341504 | DCAKD     | 0.4974 |
| ENSP00000292427 | CYP11B1   | 0.4974 |
| ENSP00000306884 | CXCL11    | 0.4974 |
| ENSP00000417656 | COX7B     | 0.4974 |

|                 |                 |        |
|-----------------|-----------------|--------|
| ENSP00000310873 | COQ2            | 0.4974 |
| ENSP00000354511 | COMT            | 0.4974 |
| ENSP00000369862 | COL4A3BP        | 0.4974 |
| ENSP00000407546 | CHRNA7          | 0.4974 |
| ENSP00000378350 | CDC23           | 0.4974 |
| ENSP00000348554 | CDC16           | 0.4974 |
| ENSP00000357153 | CD1D            | 0.4974 |
| ENSP00000264157 | CCNT2           | 0.4974 |
| ENSP00000368005 | CCNI2           | 0.4974 |
| ENSP00000381795 | CCDC33          | 0.4974 |
| ENSP00000265872 | CCAR1           | 0.4974 |
| ENSP00000264202 | CAPZB           | 0.4974 |
| ENSP00000375844 | CAPN10          | 0.4974 |
| ENSP00000158166 | CAMKK1          | 0.4974 |
| ENSP00000267103 | C12orf10        | 0.4974 |
| ENSP00000334836 | BMP2K           | 0.4974 |
| ENSP00000412957 | BIRC8           | 0.4974 |
| ENSP00000351575 | BDP1            | 0.4974 |
| ENSP00000451320 | BCL2L2-PABPN1   | 0.4974 |
| ENSP00000364683 | BAMBI           | 0.4974 |
| ENSP00000375872 | ATG16L1         | 0.4974 |
| ENSP00000349887 | ASNA1           | 0.4974 |
| ENSP00000307188 | ASL             | 0.4974 |
| ENSP00000378611 | ARHGAP24        | 0.4974 |
| ENSP00000348714 | AREL1           | 0.4974 |
| ENSP00000325369 | AP3S1           | 0.4974 |
| ENSP00000335287 | ANKRD46         | 0.4974 |
| ENSP00000312606 | AKR1A1          | 0.4974 |
| ENSP00000332448 | ADAT3           | 0.4974 |
| ENSP00000390849 | ABHD5           | 0.4974 |
| ENSP00000351717 | ABCB8           | 0.4974 |
| ENSP00000328808 | TUBB8           | 0.4974 |
| ENSP00000403936 | ENSG00000232856 | 0.4974 |
| ENSP00000311429 | ZWILCH          | 0.4947 |
| ENSP00000303015 | ZRSR2           | 0.4947 |
| ENSP00000219593 | ZP2             | 0.4947 |
| ENSP00000274712 | ZMAT2           | 0.4947 |
| ENSP00000282928 | ZIC1            | 0.4947 |
| ENSP00000257177 | ZCCHC11         | 0.4947 |
| ENSP00000362135 | YRDC            | 0.4947 |
| ENSP00000318480 | YME1L1          | 0.4947 |
| ENSP00000332772 | YIPF7           | 0.4947 |
| ENSP00000370150 | WRNIP1          | 0.4947 |
| ENSP00000450731 | VTI1B           | 0.4947 |
| ENSP00000351492 | UBL5            | 0.4947 |
| ENSP00000309198 | UBE3C           | 0.4947 |
| ENSP00000333326 | TUBA8           | 0.4947 |
| ENSP00000362255 | TSPO2           | 0.4947 |
| ENSP00000286349 | TRIM42          | 0.4947 |
| ENSP00000232975 | TNNC1           | 0.4947 |
| ENSP00000299705 | TMED3           | 0.4947 |
| ENSP00000354911 | TIFA            | 0.4947 |
| ENSP00000379612 | TAX1BP1         | 0.4947 |

|                 |          |        |
|-----------------|----------|--------|
| ENSP00000307684 | TADA3    | 0.4947 |
| ENSP00000341489 | SYDE1    | 0.4947 |
| ENSP00000360183 | STX16    | 0.4947 |
| ENSP00000455047 | SQRDL    | 0.4947 |
| ENSP00000296695 | SPINK1   | 0.4947 |
| ENSP00000366988 | SNX5     | 0.4947 |
| ENSP00000327968 | SNAI3    | 0.4947 |
| ENSP00000358605 | SMNDC1   | 0.4947 |
| ENSP00000363229 | SLC18A3  | 0.4947 |
| ENSP00000372191 | SIRT3    | 0.4947 |
| ENSP00000354829 | SGMS1    | 0.4947 |
| ENSP00000356541 | SF3B5    | 0.4947 |
| ENSP00000318861 | SF3B2    | 0.4947 |
| ENSP00000224140 | SETX     | 0.4947 |
| ENSP00000316203 | SEC14L2  | 0.4947 |
| ENSP00000278282 | SCGB1A1  | 0.4947 |
| ENSP00000357336 | RUSC1    | 0.4947 |
| ENSP00000295930 | RSRC1    | 0.4947 |
| ENSP00000291536 | RSPH1    | 0.4947 |
| ENSP00000435096 | RPS25    | 0.4947 |
| ENSP00000359345 | RPL5     | 0.4947 |
| ENSP00000307889 | RPL13    | 0.4947 |
| ENSP00000305071 | RFXANK   | 0.4947 |
| ENSP00000395449 | RECQL    | 0.4947 |
| ENSP00000320768 | RCAN1    | 0.4947 |
| ENSP00000317872 | RBBP6    | 0.4947 |
| ENSP00000356231 | RABIF    | 0.4947 |
| ENSP00000175756 | PTPN18   | 0.4947 |
| ENSP00000309474 | PSMD1    | 0.4947 |
| ENSP00000378394 | PSAP     | 0.4947 |
| ENSP00000254079 | PPP1R1B  | 0.4947 |
| ENSP00000384496 | PPP1R12B | 0.4947 |
| ENSP00000263212 | PPM1F    | 0.4947 |
| ENSP00000366828 | POLR3F   | 0.4947 |
| ENSP00000361310 | POLH     | 0.4947 |
| ENSP00000337701 | PNPLA2   | 0.4947 |
| ENSP00000369820 | PIGA     | 0.4947 |
| ENSP00000305465 | PDILT    | 0.4947 |
| ENSP00000385632 | PDE7A    | 0.4947 |
| ENSP00000351957 | PDE3A    | 0.4947 |
| ENSP00000438284 | PDE10A   | 0.4947 |
| ENSP00000387911 | PARN     | 0.4947 |
| ENSP00000219169 | NUTF2    | 0.4947 |
| ENSP00000251074 | NUP37    | 0.4947 |
| ENSP00000173229 | NTN1     | 0.4947 |
| ENSP00000359297 | NSDHL    | 0.4947 |
| ENSP00000263317 | NOX4     | 0.4947 |
| ENSP00000243346 | NMI      | 0.4947 |
| ENSP00000219479 | NME4     | 0.4947 |
| ENSP00000377696 | NIT2     | 0.4947 |
| ENSP00000362873 | NDUFA8   | 0.4947 |
| ENSP00000326806 | NCBP2    | 0.4947 |
| ENSP00000350467 | NAT9     | 0.4947 |

|                 |                 |        |
|-----------------|-----------------|--------|
| ENSP00000362617 | NAP1L6          | 0.4947 |
| ENSP00000320488 | NAP1L5          | 0.4947 |
| ENSP00000386213 | MYO3B           | 0.4947 |
| ENSP00000421280 | MYO10           | 0.4947 |
| ENSP00000223364 | MYL7            | 0.4947 |
| ENSP00000354665 | MT-ND6          | 0.4947 |
| ENSP00000347324 | MSRB3           | 0.4947 |
| ENSP00000313921 | MSRA            | 0.4947 |
| ENSP00000364320 | MRTO4           | 0.4947 |
| ENSP00000353643 | MORF4L2         | 0.4947 |
| ENSP00000257979 | MIP             | 0.4947 |
| ENSP00000426103 | MIB2            | 0.4947 |
| ENSP00000302111 | MGMT            | 0.4947 |
| ENSP00000219596 | MEFV            | 0.4947 |
| ENSP00000377686 | MED24           | 0.4947 |
| ENSP00000354346 | MATR3           | 0.4947 |
| ENSP00000411397 | MARK3           | 0.4947 |
| ENSP00000228918 | LTBR            | 0.4947 |
| ENSP00000368516 | LGR4            | 0.4947 |
| ENSP00000354526 | L3MBTL3         | 0.4947 |
| ENSP00000398516 | L3MBTL1         | 0.4947 |
| ENSP00000167586 | KRT14           | 0.4947 |
| ENSP00000261667 | KPNA3           | 0.4947 |
| ENSP00000368976 | KIFC3           | 0.4947 |
| ENSP00000301738 | KCTD5           | 0.4947 |
| ENSP00000325448 | KARS            | 0.4947 |
| ENSP00000283249 | ITGB6           | 0.4947 |
| ENSP00000228534 | IL23A           | 0.4947 |
| ENSP00000233813 | IGFBP5          | 0.4947 |
| ENSP00000360874 | IFIT1B          | 0.4947 |
| ENSP00000261465 | HSD11B1         | 0.4947 |
| ENSP00000295470 | HNRPDL          | 0.4947 |
| ENSP00000377492 | HMMR            | 0.4947 |
| ENSP00000358414 | HMGCS2          | 0.4947 |
| ENSP00000295934 | HESX1           | 0.4947 |
| ENSP00000330721 | HDDC3           | 0.4947 |
| ENSP00000329002 | HAX1            | 0.4947 |
| ENSP00000316339 | HAO2            | 0.4947 |
| ENSP00000323811 | HACL1           | 0.4947 |
| ENSP00000348168 | GTF2E2          | 0.4947 |
| ENSP00000264954 | GRPEL1          | 0.4947 |
| ENSP00000264039 | GPC1            | 0.4947 |
| ENSP00000360021 | GNG12           | 0.4947 |
| ENSP00000356410 | GLRX2           | 0.4947 |
| ENSP00000387170 | GIGYF2          | 0.4947 |
| ENSP00000285873 | GEMIN5          | 0.4947 |
| ENSP00000297537 | GBX1            | 0.4947 |
| ENSP00000351605 | FZD6            | 0.4947 |
| ENSP00000349356 | FIGNL1          | 0.4947 |
| ENSP00000373952 | FANCA           | 0.4947 |
| ENSP00000273854 | EPHA5           | 0.4947 |
| ENSP00000281821 | EPHA4           | 0.4947 |
| ENSP00000456711 | ENSG00000259753 | 0.4947 |

|                 |          |        |
|-----------------|----------|--------|
| ENSP00000243878 | ENKD1    | 0.4947 |
| ENSP00000346693 | ELOVL2   | 0.4947 |
| ENSP00000320503 | EDC3     | 0.4947 |
| ENSP00000257192 | DSG1     | 0.4947 |
| ENSP00000401653 | DRGX     | 0.4947 |
| ENSP00000176183 | DRD4     | 0.4947 |
| ENSP00000319651 | DMRTA1   | 0.4947 |
| ENSP00000349893 | DLK2     | 0.4947 |
| ENSP00000358563 | DKC1     | 0.4947 |
| ENSP00000392066 | DIP2A    | 0.4947 |
| ENSP00000228027 | DGAT2    | 0.4947 |
| ENSP00000306117 | DDX19A   | 0.4947 |
| ENSP00000217109 | CSTF1    | 0.4947 |
| ENSP00000262982 | CSE1L    | 0.4947 |
| ENSP00000339353 | CPSF1    | 0.4947 |
| ENSP00000344562 | CORO6    | 0.4947 |
| ENSP00000454783 | CORO2B   | 0.4947 |
| ENSP00000364000 | COL5A2   | 0.4947 |
| ENSP00000402460 | CLSTN2   | 0.4947 |
| ENSP00000363500 | CLIC4    | 0.4947 |
| ENSP00000326699 | CLGN     | 0.4947 |
| ENSP00000388548 | CITED1   | 0.4947 |
| ENSP00000258930 | CIB2     | 0.4947 |
| ENSP00000265148 | CENPE    | 0.4947 |
| ENSP00000301019 | CDT1     | 0.4947 |
| ENSP00000335357 | CDKN3    | 0.4947 |
| ENSP00000263645 | CD81     | 0.4947 |
| ENSP00000355361 | CD47     | 0.4947 |
| ENSP00000325708 | CD37     | 0.4947 |
| ENSP00000428982 | CCNC     | 0.4947 |
| ENSP00000369689 | CALML5   | 0.4947 |
| ENSP00000360406 | CACNA1B  | 0.4947 |
| ENSP00000256119 | CA1      | 0.4947 |
| ENSP00000373340 | BRPF1    | 0.4947 |
| ENSP00000274353 | BHMT     | 0.4947 |
| ENSP00000219794 | BCKDK    | 0.4947 |
| ENSP00000331210 | BCAN     | 0.4947 |
| ENSP00000287322 | BAG4     | 0.4947 |
| ENSP00000319979 | B3GNTL1  | 0.4947 |
| ENSP00000253856 | ATP6V0A4 | 0.4947 |
| ENSP00000354490 | ATP1A2   | 0.4947 |
| ENSP00000265138 | ARRDC3   | 0.4947 |
| ENSP00000295087 | ARL5A    | 0.4947 |
| ENSP00000308496 | ARL10    | 0.4947 |
| ENSP00000366121 | ARHGAP27 | 0.4947 |
| ENSP00000335578 | ARGFX    | 0.4947 |
| ENSP00000308583 | APITD1   | 0.4947 |
| ENSP00000299402 | APBB1    | 0.4947 |
| ENSP00000257863 | AMHR2    | 0.4947 |
| ENSP00000290649 | AMFR     | 0.4947 |
| ENSP00000258494 | ALDH1L2  | 0.4947 |
| ENSP00000235835 | AKR7A2   | 0.4947 |
| ENSP00000378359 | ADH6     | 0.4947 |



|                 |               |        |
|-----------------|---------------|--------|
| ENSP00000329468 | ADAP2         | 0.4947 |
| ENSP00000295137 | ACTG2         | 0.4947 |
| ENSP00000290378 | ACTC1         | 0.4947 |
| ENSP00000158762 | ACAP1         | 0.4947 |
| ENSP00000250615 | AANAT         | 0.4947 |
| ENSP00000304593 | ZNHIT1        | 0.4921 |
| ENSP00000267807 | ZNF280D       | 0.4921 |
| ENSP00000450742 | ZFYVE1        | 0.4921 |
| ENSP00000384716 | ZDHHC8        | 0.4921 |
| ENSP00000380675 | WEE2          | 0.4921 |
| ENSP00000468969 | WDR83OS       | 0.4921 |
| ENSP00000387982 | WDR73         | 0.4921 |
| ENSP00000297873 | WBSCR27       | 0.4921 |
| ENSP00000377944 | UTP14A        | 0.4921 |
| ENSP00000218348 | USP11         | 0.4921 |
| ENSP00000005226 | USH1C         | 0.4921 |
| ENSP00000361289 | UCK1          | 0.4921 |
| ENSP00000360613 | UBE2A         | 0.4921 |
| ENSP00000333266 | UBA7          | 0.4921 |
| ENSP00000256592 | TSHB          | 0.4921 |
| ENSP00000283351 | TRAPPC8       | 0.4921 |
| ENSP00000362261 | TRAPPC3       | 0.4921 |
| ENSP00000300403 | TPX2          | 0.4921 |
| ENSP00000361900 | TOMM34        | 0.4921 |
| ENSP00000359928 | TNNI3K        | 0.4921 |
| ENSP00000365435 | TNFRSF1B      | 0.4921 |
| ENSP00000254616 | TIMM10B       | 0.4921 |
| ENSP00000361158 | TESK2         | 0.4921 |
| ENSP00000364034 | TAP2          | 0.4921 |
| ENSP00000259075 | TANK          | 0.4921 |
| ENSP00000286713 | STOM          | 0.4921 |
| ENSP00000263373 | SPTBN4        | 0.4921 |
| ENSP00000363149 | SPDEF         | 0.4921 |
| ENSP00000427463 | SPCS3         | 0.4921 |
| ENSP00000451145 | SOX7          | 0.4921 |
| ENSP00000251775 | SNX4          | 0.4921 |
| ENSP00000380336 | SMU1          | 0.4921 |
| ENSP00000323421 | SMC1A         | 0.4921 |
| ENSP00000247138 | SLC35A2       | 0.4921 |
| ENSP00000252595 | SLC27A1       | 0.4921 |
| ENSP00000326305 | SLC25A20      | 0.4921 |
| ENSP00000225519 | SHPK          | 0.4921 |
| ENSP00000371512 | SGCZ          | 0.4921 |
| ENSP00000335321 | SF3B1         | 0.4921 |
| ENSP00000307599 | SCN11A        | 0.4921 |
| ENSP00000252542 | SAFB2         | 0.4921 |
| ENSP00000246115 | S1PR4         | 0.4921 |
| ENSP00000317895 | RPTN          | 0.4921 |
| ENSP00000309830 | RPL38         | 0.4921 |
| ENSP00000252543 | RPL36         | 0.4921 |
| ENSP00000401450 | RPL28         | 0.4921 |
| ENSP00000447001 | RPL18         | 0.4921 |
| ENSP00000467396 | RP11-886H22.1 | 0.4921 |

|                 |             |        |
|-----------------|-------------|--------|
| ENSP00000251507 | RABGAP1L    | 0.4921 |
| ENSP00000308720 | PRSS1       | 0.4921 |
| ENSP00000349577 | PRODH       | 0.4921 |
| ENSP00000368752 | PRNP        | 0.4921 |
| ENSP00000264399 | PRKG2       | 0.4921 |
| ENSP00000276594 | PRDM14      | 0.4921 |
| ENSP00000292539 | PPP1R16A    | 0.4921 |
| ENSP00000304169 | PITX2       | 0.4921 |
| ENSP00000288022 | PDF         | 0.4921 |
| ENSP00000418194 | PARP14      | 0.4921 |
| ENSP00000238714 | PAPOLG      | 0.4921 |
| ENSP00000262890 | PAFAH1B3    | 0.4921 |
| ENSP00000311665 | PAAF1       | 0.4921 |
| ENSP00000311713 | OXR1        | 0.4921 |
| ENSP00000340836 | OSTF1       | 0.4921 |
| ENSP00000220514 | OIP5        | 0.4921 |
| ENSP00000361835 | NXF2B       | 0.4921 |
| ENSP00000331471 | NXF2        | 0.4921 |
| ENSP00000263273 | NUCB1       | 0.4921 |
| ENSP00000283027 | NUBP1       | 0.4921 |
| ENSP00000371201 | NSUN7       | 0.4921 |
| ENSP00000418529 | NSFL1C      | 0.4921 |
| ENSP00000265074 | NPR3        | 0.4921 |
| ENSP00000416658 | NME6        | 0.4921 |
| ENSP00000254940 | NIP7        | 0.4921 |
| ENSP00000362171 | NAP1L3      | 0.4921 |
| ENSP00000463645 | MYO15B      | 0.4921 |
| ENSP00000274813 | MUT         | 0.4921 |
| ENSP00000263629 | MTIF2       | 0.4921 |
| ENSP00000417871 | MSH5-SAPCD1 | 0.4921 |
| ENSP00000360498 | MRPL41      | 0.4921 |
| ENSP00000262794 | MOV10L1     | 0.4921 |
| ENSP00000310189 | MOB1B       | 0.4921 |
| ENSP00000286317 | MED7        | 0.4921 |
| ENSP00000380888 | MED13       | 0.4921 |
| ENSP00000352852 | MDK         | 0.4921 |
| ENSP00000365588 | MDC1        | 0.4921 |
| ENSP00000349640 | MCRS1       | 0.4921 |
| ENSP00000249016 | MCHR1       | 0.4921 |
| ENSP00000440374 | MCF2L       | 0.4921 |
| ENSP00000265594 | MCCC1       | 0.4921 |
| ENSP00000356247 | LGR6        | 0.4921 |
| ENSP00000264005 | LCAT        | 0.4921 |
| ENSP00000284898 | L3MBTL4     | 0.4921 |
| ENSP00000264170 | KYNU        | 0.4921 |
| ENSP00000229214 | KRR1        | 0.4921 |
| ENSP00000265529 | KIF9        | 0.4921 |
| ENSP00000347409 | KEL         | 0.4921 |
| ENSP00000385806 | KCNMA1      | 0.4921 |
| ENSP00000360133 | ITGB3BP     | 0.4921 |
| ENSP00000282588 | ITGA1       | 0.4921 |
| ENSP00000360200 | INADL       | 0.4921 |
| ENSP00000264538 | IFT57       | 0.4921 |

|                 |          |        |
|-----------------|----------|--------|
| ENSP00000260570 | IFT172   | 0.4921 |
| ENSP00000306549 | HSFY2    | 0.4921 |
| ENSP00000254878 | HRSP12   | 0.4921 |
| ENSP00000441828 | HPR      | 0.4921 |
| ENSP00000362566 | HPCA     | 0.4921 |
| ENSP00000438468 | HHAT     | 0.4921 |
| ENSP00000430620 | HEPH     | 0.4921 |
| ENSP00000361219 | GTF3C4   | 0.4921 |
| ENSP00000379372 | GTF2A2   | 0.4921 |
| ENSP00000300177 | GREM1    | 0.4921 |
| ENSP00000264718 | GPN1     | 0.4921 |
| ENSP00000225724 | GOSR1    | 0.4921 |
| ENSP00000371594 | GNG7     | 0.4921 |
| ENSP00000414019 | GDPD2    | 0.4921 |
| ENSP00000247005 | GDF1     | 0.4921 |
| ENSP00000366482 | FXN      | 0.4921 |
| ENSP00000328720 | FOXK1    | 0.4921 |
| ENSP00000222308 | FKBP8    | 0.4921 |
| ENSP00000354691 | FCRL5    | 0.4921 |
| ENSP00000357167 | FCRL3    | 0.4921 |
| ENSP00000313034 | FBXW5    | 0.4921 |
| ENSP00000346240 | FBXO2    | 0.4921 |
| ENSP00000330098 | FBXL6    | 0.4921 |
| ENSP00000445905 | EVI5L    | 0.4921 |
| ENSP00000310520 | ERCC4    | 0.4921 |
| ENSP00000347213 | ENTPD2   | 0.4921 |
| ENSP00000361536 | ELOVL1   | 0.4921 |
| ENSP00000369460 | ELAVL2   | 0.4921 |
| ENSP00000328777 | EFNA5    | 0.4921 |
| ENSP00000436585 | ECHDC1   | 0.4921 |
| ENSP00000349679 | DYNLRB1  | 0.4921 |
| ENSP00000260605 | DYNC2LI1 | 0.4921 |
| ENSP00000227451 | DTX4     | 0.4921 |
| ENSP00000250937 | DOHH     | 0.4921 |
| ENSP00000262442 | DNAH9    | 0.4921 |
| ENSP00000205402 | DLD      | 0.4921 |
| ENSP00000346236 | DDX46    | 0.4921 |
| ENSP00000384703 | DDX11    | 0.4921 |
| ENSP00000302805 | DDI1     | 0.4921 |
| ENSP00000349768 | DCHS2    | 0.4921 |
| ENSP00000221700 | CYP4F2   | 0.4921 |
| ENSP00000273062 | CTDSP1   | 0.4921 |
| ENSP00000299543 | CTDP1    | 0.4921 |
| ENSP00000327647 | CRADD    | 0.4921 |
| ENSP00000219150 | CORO1A   | 0.4921 |
| ENSP00000262812 | COPE     | 0.4921 |
| ENSP00000396755 | CNTD2    | 0.4921 |
| ENSP00000378505 | CLK3     | 0.4921 |
| ENSP00000296130 | CLEC3B   | 0.4921 |
| ENSP00000216492 | CHGA     | 0.4921 |
| ENSP00000416561 | CFB      | 0.4921 |
| ENSP00000219172 | CENPT    | 0.4921 |
| ENSP00000260662 | CENPO    | 0.4921 |

|                 |          |        |
|-----------------|----------|--------|
| ENSP00000355731 | CDC42BPA | 0.4921 |
| ENSP00000311984 | CARKD    | 0.4921 |
| ENSP00000263168 | CAPZA1   | 0.4921 |
| ENSP00000269881 | CALR3    | 0.4921 |
| ENSP00000356652 | CACYBP   | 0.4921 |
| ENSP00000270458 | CACNG8   | 0.4921 |
| ENSP00000377840 | CACNB1   | 0.4921 |
| ENSP00000443246 | BCKDHA   | 0.4921 |
| ENSP00000357475 | ATP8B2   | 0.4921 |
| ENSP00000290299 | ATP5O    | 0.4921 |
| ENSP00000348205 | ATP5G1   | 0.4921 |
| ENSP00000215375 | ATP5D    | 0.4921 |
| ENSP00000263382 | ASF1B    | 0.4921 |
| ENSP00000419199 | ASB14    | 0.4921 |
| ENSP00000391751 | ARL17B   | 0.4921 |
| ENSP00000263620 | ARID3A   | 0.4921 |
| ENSP00000379709 | ARHGAP21 | 0.4921 |
| ENSP00000386502 | ANKRD61  | 0.4921 |
| ENSP00000377051 | ANKRD42  | 0.4921 |
| ENSP00000304292 | ANKRD27  | 0.4921 |
| ENSP00000265512 | ADH4     | 0.4921 |
| ENSP00000320646 | ACSF3    | 0.4921 |
| ENSP00000216139 | ACR      | 0.4921 |
| ENSP00000354995 | ABCG1    | 0.4921 |
| ENSP00000360215 | ZBP1     | 0.4895 |
| ENSP00000343435 | YIF1B    | 0.4895 |
| ENSP00000352271 | XRCC2    | 0.4895 |
| ENSP00000353793 | WDHD1    | 0.4895 |
| ENSP00000417185 | VWA1     | 0.4895 |
| ENSP00000267202 | VPS37B   | 0.4895 |
| ENSP00000327246 | VIPR1    | 0.4895 |
| ENSP00000308332 | UTP23    | 0.4895 |
| ENSP00000285199 | USP43    | 0.4895 |
| ENSP00000003302 | USP28    | 0.4895 |
| ENSP00000305941 | USH2A    | 0.4895 |
| ENSP00000260323 | UNC13C   | 0.4895 |
| ENSP00000311648 | UGT8     | 0.4895 |
| ENSP00000263202 | UFD1L    | 0.4895 |
| ENSP00000379931 | UBE2E2   | 0.4895 |
| ENSP00000252029 | TYMP     | 0.4895 |
| ENSP00000266254 | TLL1     | 0.4895 |
| ENSP00000261647 | TTC19    | 0.4895 |
| ENSP00000262294 | TRIM37   | 0.4895 |
| ENSP00000357750 | TRAF3IP2 | 0.4895 |
| ENSP00000297071 | TRA2A    | 0.4895 |
| ENSP00000344215 | TP53INP1 | 0.4895 |
| ENSP00000238721 | TP53I3   | 0.4895 |
| ENSP00000337022 | TNNI1    | 0.4895 |
| ENSP00000303476 | TLN2     | 0.4895 |
| ENSP00000352926 | TEAD4    | 0.4895 |
| ENSP00000300584 | TBC1D2B  | 0.4895 |
| ENSP00000245934 | SYMPK    | 0.4895 |
| ENSP00000340279 | SSX2IP   | 0.4895 |

|                 |               |        |
|-----------------|---------------|--------|
| ENSP00000311609 | SPSB4         | 0.4895 |
| ENSP00000363391 | SPAG4         | 0.4895 |
| ENSP00000320246 | SLC9A9        | 0.4895 |
| ENSP00000354966 | SLC9A8        | 0.4895 |
| ENSP00000370128 | SLC7A1        | 0.4895 |
| ENSP00000370192 | SLC46A3       | 0.4895 |
| ENSP00000377401 | SLC35B2       | 0.4895 |
| ENSP00000323568 | SLC2A2        | 0.4895 |
| ENSP00000267842 | SLC27A2       | 0.4895 |
| ENSP00000200652 | SLC22A4       | 0.4895 |
| ENSP00000254722 | SERPINF1      | 0.4895 |
| ENSP00000331692 | SCRT1         | 0.4895 |
| ENSP00000262288 | SCPEP1        | 0.4895 |
| ENSP00000261693 | SCARB1        | 0.4895 |
| ENSP00000466933 | S1PR2         | 0.4895 |
| ENSP00000198767 | RRN3          | 0.4895 |
| ENSP00000348849 | RPS26         | 0.4895 |
| ENSP00000465737 | RP11-729L2.2  | 0.4895 |
| ENSP00000309431 | RP11-683L23.1 | 0.4895 |
| ENSP00000373772 | RNF20         | 0.4895 |
| ENSP00000358297 | RNF115        | 0.4895 |
| ENSP00000370750 | RDH11         | 0.4895 |
| ENSP00000252483 | PVRL2         | 0.4895 |
| ENSP00000351342 | PTPN5         | 0.4895 |
| ENSP00000341170 | PTN           | 0.4895 |
| ENSP00000157812 | PSMC4         | 0.4895 |
| ENSP00000365773 | PSAT1         | 0.4895 |
| ENSP00000347906 | PRMT2         | 0.4895 |
| ENSP00000263433 | PPP1R12C      | 0.4895 |
| ENSP00000253925 | PPFIA1        | 0.4895 |
| ENSP00000367029 | POLR1E        | 0.4895 |
| ENSP00000386105 | POLD2         | 0.4895 |
| ENSP00000388631 | PLCD4         | 0.4895 |
| ENSP00000265382 | PIP5K1B       | 0.4895 |
| ENSP00000252603 | PGLS          | 0.4895 |
| ENSP00000359991 | PGAM1         | 0.4895 |
| ENSP00000369100 | PFKFB3        | 0.4895 |
| ENSP00000261813 | PFDN1         | 0.4895 |
| ENSP00000419975 | PEX5L         | 0.4895 |
| ENSP00000419027 | PCCB          | 0.4895 |
| ENSP00000234040 | PASK          | 0.4895 |
| ENSP00000271452 | NUF2          | 0.4895 |
| ENSP00000376349 | NUDT14        | 0.4895 |
| ENSP00000263257 | NOVA2         | 0.4895 |
| ENSP00000354541 | NLGN1         | 0.4895 |
| ENSP00000322087 | NHLH2         | 0.4895 |
| ENSP00000409936 | MYO19         | 0.4895 |
| ENSP00000273353 | MYH15         | 0.4895 |
| ENSP00000370968 | MYBBP1A       | 0.4895 |
| ENSP00000333401 | MRPL40        | 0.4895 |
| ENSP00000315702 | MOB4          | 0.4895 |
| ENSP00000328251 | MINA          | 0.4895 |
| ENSP00000366939 | MGME1         | 0.4895 |

|                 |         |        |
|-----------------|---------|--------|
| ENSP00000219905 | MGA     | 0.4895 |
| ENSP00000352657 | ME3     | 0.4895 |
| ENSP00000262891 | MARK4   | 0.4895 |
| ENSP00000364813 | LSM2    | 0.4895 |
| ENSP00000359990 | LRRC40  | 0.4895 |
| ENSP00000280706 | LDHAL6A | 0.4895 |
| ENSP00000310551 | LCLAT1  | 0.4895 |
| ENSP00000370671 | KLHL42  | 0.4895 |
| ENSP00000232766 | KLHL18  | 0.4895 |
| ENSP00000346401 | KIF25   | 0.4895 |
| ENSP00000295101 | KCNJ3   | 0.4895 |
| ENSP00000222573 | ITGB8   | 0.4895 |
| ENSP00000380227 | ITGA4   | 0.4895 |
| ENSP00000387347 | IQCA1   | 0.4895 |
| ENSP00000274520 | IL9     | 0.4895 |
| ENSP00000375795 | IL24    | 0.4895 |
| ENSP00000406012 | IFT140  | 0.4895 |
| ENSP00000360860 | IFIT5   | 0.4895 |
| ENSP00000362352 | H2AFY2  | 0.4895 |
| ENSP00000248935 | GSTT1   | 0.4895 |
| ENSP00000257248 | GIF     | 0.4895 |
| ENSP00000257868 | GDF11   | 0.4895 |
| ENSP00000421725 | GC      | 0.4895 |
| ENSP00000272252 | GALM    | 0.4895 |
| ENSP00000259271 | GAD2    | 0.4895 |
| ENSP00000229030 | FZD10   | 0.4895 |
| ENSP00000287934 | FZD1    | 0.4895 |
| ENSP00000418823 | FTO     | 0.4895 |
| ENSP00000242209 | FKBP9   | 0.4895 |
| ENSP00000333097 | FIGLA   | 0.4895 |
| ENSP00000358165 | FCGR1A  | 0.4895 |
| ENSP00000310332 | FBXO45  | 0.4895 |
| ENSP00000281828 | FARSB   | 0.4895 |
| ENSP00000264042 | FARP2   | 0.4895 |
| ENSP00000308541 | F2      | 0.4895 |
| ENSP00000257934 | ESPL1   | 0.4895 |
| ENSP00000288221 | ERC2    | 0.4895 |
| ENSP00000248342 | EIF3K   | 0.4895 |
| ENSP00000417229 | EIF2A   | 0.4895 |
| ENSP00000312224 | DTD2    | 0.4895 |
| ENSP00000261590 | DSG2    | 0.4895 |
| ENSP00000404179 | DOCK4   | 0.4895 |
| ENSP00000276570 | DNAJC5B | 0.4895 |
| ENSP00000368565 | DNAJC2  | 0.4895 |
| ENSP00000220496 | DNAJC17 | 0.4895 |
| ENSP00000265028 | DNAJB11 | 0.4895 |
| ENSP00000314030 | DNAJA2  | 0.4895 |
| ENSP00000255189 | DMGDH   | 0.4895 |
| ENSP00000249749 | DLL4    | 0.4895 |
| ENSP00000263576 | DDX25   | 0.4895 |
| ENSP00000288071 | DDX19B  | 0.4895 |
| ENSP00000356218 | CYB5R1  | 0.4895 |
| ENSP00000264474 | CSTA    | 0.4895 |

|                 |          |        |
|-----------------|----------|--------|
| ENSP00000227251 | CRYAB    | 0.4895 |
| ENSP00000312189 | CPT1B    | 0.4895 |
| ENSP00000320672 | COX6B2   | 0.4895 |
| ENSP00000340211 | CORO1B   | 0.4895 |
| ENSP00000268717 | COPS3    | 0.4895 |
| ENSP00000273308 | CNPY2    | 0.4895 |
| ENSP00000349147 | CNNM1    | 0.4895 |
| ENSP00000337056 | CDKN2D   | 0.4895 |
| ENSP00000327191 | CCT6B    | 0.4895 |
| ENSP00000344460 | CBS      | 0.4895 |
| ENSP00000372169 | CACNA2D4 | 0.4895 |
| ENSP00000288139 | CACNA1D  | 0.4895 |
| ENSP00000312054 | C7orf10  | 0.4895 |
| ENSP00000347197 | C5AR1    | 0.4895 |
| ENSP00000256319 | C14orf1  | 0.4895 |
| ENSP00000179259 | C12orf5  | 0.4895 |
| ENSP00000331369 | BOLA3    | 0.4895 |
| ENSP00000259407 | BAAT     | 0.4895 |
| ENSP00000381590 | ATXN7    | 0.4895 |
| ENSP00000264649 | ATP6V0A1 | 0.4895 |
| ENSP00000229595 | ASF1A    | 0.4895 |
| ENSP00000269586 | ARL5C    | 0.4895 |
| ENSP00000337478 | ARL17A   | 0.4895 |
| ENSP00000282026 | ARL11    | 0.4895 |
| ENSP00000374423 | ARHGAP8  | 0.4895 |
| ENSP00000260283 | ARHGAP20 | 0.4895 |
| ENSP00000255040 | APCS     | 0.4895 |
| ENSP00000306185 | ANTXR2   | 0.4895 |
| ENSP00000378260 | ALG13    | 0.4895 |
| ENSP00000293350 | ALDH16A1 | 0.4895 |
| ENSP00000370129 | AKR1C2   | 0.4895 |
| ENSP00000223029 | AIMP2    | 0.4895 |
| ENSP00000407436 | AGAP10   | 0.4895 |
| ENSP00000420269 | ADH7     | 0.4895 |
| ENSP00000413074 | ADAL     | 0.4895 |
| ENSP00000373574 | ACVRL1   | 0.4895 |
| ENSP00000290866 | ACE      | 0.4895 |
| ENSP00000304111 | ABCG4    | 0.4895 |
| ENSP00000304308 | ZNF217   | 0.4868 |
| ENSP00000368727 | XDH      | 0.4868 |
| ENSP00000334186 | VWCE     | 0.4868 |
| ENSP00000358207 | VAX1     | 0.4868 |
| ENSP00000236192 | VAMP4    | 0.4868 |
| ENSP00000261497 | USP22    | 0.4868 |
| ENSP00000357775 | UROS     | 0.4868 |
| ENSP00000314480 | UNCX     | 0.4868 |
| ENSP00000262999 | UCP1     | 0.4868 |
| ENSP00000360116 | UBE2U    | 0.4868 |
| ENSP00000358323 | TXNIP    | 0.4868 |
| ENSP00000264255 | TXNDC9   | 0.4868 |
| ENSP00000318197 | TUBA3E   | 0.4868 |
| ENSP00000326042 | TUBA3D   | 0.4868 |
| ENSP00000260116 | TTPA     | 0.4868 |

|                 |               |        |
|-----------------|---------------|--------|
| ENSP00000323889 | TRIM25        | 0.4868 |
| ENSP00000436005 | TRAPPC4       | 0.4868 |
| ENSP00000266712 | TMTC3         | 0.4868 |
| ENSP00000335416 | TMEM68        | 0.4868 |
| ENSP00000454670 | TMBIM4        | 0.4868 |
| ENSP00000356256 | TIMM17A       | 0.4868 |
| ENSP00000357362 | THBS3         | 0.4868 |
| ENSP00000273368 | TAGLN3        | 0.4868 |
| ENSP00000263846 | SYT7          | 0.4868 |
| ENSP00000247001 | SUGP1         | 0.4868 |
| ENSP00000339435 | SRR           | 0.4868 |
| ENSP00000349677 | SPOCK3        | 0.4868 |
| ENSP00000365811 | SPAG6         | 0.4868 |
| ENSP00000251809 | SPAG1         | 0.4868 |
| ENSP00000301466 | SOAT2         | 0.4868 |
| ENSP00000403310 | SNRNP35       | 0.4868 |
| ENSP00000393453 | SMYD1         | 0.4868 |
| ENSP00000357650 | SLC27A3       | 0.4868 |
| ENSP00000398930 | SGCE          | 0.4868 |
| ENSP00000341117 | SDSL          | 0.4868 |
| ENSP00000272091 | SDE2          | 0.4868 |
| ENSP00000390600 | SCN10A        | 0.4868 |
| ENSP00000373884 | RYR3          | 0.4868 |
| ENSP00000007264 | RPUSD1        | 0.4868 |
| ENSP00000265100 | RPL26L1       | 0.4868 |
| ENSP00000456318 | RP11-234B24.6 | 0.4868 |
| ENSP00000381214 | RGPD2         | 0.4868 |
| ENSP00000381253 | RGPD1         | 0.4868 |
| ENSP00000170168 | REXO1         | 0.4868 |
| ENSP00000336606 | RAD54B        | 0.4868 |
| ENSP00000326003 | PUS10         | 0.4868 |
| ENSP00000327704 | PSMF1         | 0.4868 |
| ENSP00000363939 | PPP3R2        | 0.4868 |
| ENSP00000261207 | PPP1R12A      | 0.4868 |
| ENSP00000370222 | POMP          | 0.4868 |
| ENSP00000396045 | PLA2G4B       | 0.4868 |
| ENSP00000374409 | PKP4          | 0.4868 |
| ENSP00000348611 | PHLPP2        | 0.4868 |
| ENSP00000455607 | PHKG2         | 0.4868 |
| ENSP00000300056 | PEX11A        | 0.4868 |
| ENSP00000263985 | PET112        | 0.4868 |
| ENSP00000397157 | PERP          | 0.4868 |
| ENSP00000319814 | PCK1          | 0.4868 |
| ENSP00000384048 | PAXIP1        | 0.4868 |
| ENSP00000263650 | OSBPL5        | 0.4868 |
| ENSP00000380544 | OGFOD2        | 0.4868 |
| ENSP00000359532 | NTSR1         | 0.4868 |
| ENSP00000447149 | NR1H4         | 0.4868 |
| ENSP00000322450 | NDUFV1        | 0.4868 |
| ENSP00000379430 | NDUFAF6       | 0.4868 |
| ENSP00000252575 | NCAN          | 0.4868 |
| ENSP00000261182 | NAPIL1        | 0.4868 |
| ENSP00000290810 | NAE1          | 0.4868 |



|                 |          |        |
|-----------------|----------|--------|
| ENSP00000252172 | MYH13    | 0.4868 |
| ENSP00000265052 | MGLL     | 0.4868 |
| ENSP00000362166 | MEAF6    | 0.4868 |
| ENSP00000290429 | MCAT     | 0.4868 |
| ENSP00000309141 | MARCH3   | 0.4868 |
| ENSP00000293872 | LUC7L    | 0.4868 |
| ENSP00000376333 | LLGL2    | 0.4868 |
| ENSP00000373487 | KRT18    | 0.4868 |
| ENSP00000308452 | KRT17    | 0.4868 |
| ENSP00000352138 | KIRREL   | 0.4868 |
| ENSP00000301332 | KIFC2    | 0.4868 |
| ENSP00000320821 | KIF1C    | 0.4868 |
| ENSP00000007722 | ITGA3    | 0.4868 |
| ENSP00000452007 | ISCA2    | 0.4868 |
| ENSP00000310260 | INTS6    | 0.4868 |
| ENSP00000413937 | INPP5K   | 0.4868 |
| ENSP00000384534 | INPP5J   | 0.4868 |
| ENSP00000168216 | HSD17B10 | 0.4868 |
| ENSP00000265983 | HPX      | 0.4868 |
| ENSP00000334382 | HOMER1   | 0.4868 |
| ENSP00000339398 | HLA-DQA1 | 0.4868 |
| ENSP00000267845 | HDC      | 0.4868 |
| ENSP00000380514 | HAGH     | 0.4868 |
| ENSP00000351644 | GTPBP3   | 0.4868 |
| ENSP00000350348 | GRM7     | 0.4868 |
| ENSP00000231188 | GRM6     | 0.4868 |
| ENSP00000285900 | GRIA1    | 0.4868 |
| ENSP00000303077 | GOT1L1   | 0.4868 |
| ENSP00000318821 | GCC1     | 0.4868 |
| ENSP00000363826 | FZD8     | 0.4868 |
| ENSP00000286201 | FZD7     | 0.4868 |
| ENSP00000346901 | FMO1     | 0.4868 |
| ENSP00000357789 | FLG      | 0.4868 |
| ENSP00000333836 | FIGN     | 0.4868 |
| ENSP00000344393 | FCF1     | 0.4868 |
| ENSP00000345008 | FBLN5    | 0.4868 |
| ENSP00000261800 | FAT2     | 0.4868 |
| ENSP00000452762 | ETFA     | 0.4868 |
| ENSP00000266397 | ERP27    | 0.4868 |
| ENSP00000256398 | ELP3     | 0.4868 |
| ENSP00000364687 | EHMT2    | 0.4868 |
| ENSP00000263991 | EHBP1    | 0.4868 |
| ENSP00000263083 | DPH1     | 0.4868 |
| ENSP00000280346 | DLAT     | 0.4868 |
| ENSP00000311135 | DHX37    | 0.4868 |
| ENSP00000367527 | DCLRE1C  | 0.4868 |
| ENSP00000227256 | DBX1     | 0.4868 |
| ENSP00000371870 | DAZ2     | 0.4868 |
| ENSP00000259371 | DAB2IP   | 0.4868 |
| ENSP00000268053 | CYP11A1  | 0.4868 |
| ENSP00000267085 | CSAD     | 0.4868 |
| ENSP00000366557 | CRNKL1   | 0.4868 |
| ENSP00000365243 | COX4I2   | 0.4868 |

|                 |                 |        |
|-----------------|-----------------|--------|
| ENSP0000016171  | COX15           | 0.4868 |
| ENSP00000354778 | CNTNAP2         | 0.4868 |
| ENSP00000366513 | CLSTN1          | 0.4868 |
| ENSP00000442057 | CINP            | 0.4868 |
| ENSP00000377747 | CHD2            | 0.4868 |
| ENSP00000337103 | CHAT            | 0.4868 |
| ENSP00000315700 | CHAF1B          | 0.4868 |
| ENSP00000309629 | CFL1            | 0.4868 |
| ENSP00000377007 | CENPN           | 0.4868 |
| ENSP00000242872 | CENPK           | 0.4868 |
| ENSP00000262738 | CELSR1          | 0.4868 |
| ENSP00000237654 | CCNI            | 0.4868 |
| ENSP00000331636 | CAPN12          | 0.4868 |
| ENSP00000265431 | CALB1           | 0.4868 |
| ENSP00000320025 | CACNB2          | 0.4868 |
| ENSP00000363135 | C6orf106        | 0.4868 |
| ENSP00000282701 | BMP3            | 0.4868 |
| ENSP00000359727 | BAG2            | 0.4868 |
| ENSP00000284509 | ATP8B4          | 0.4868 |
| ENSP00000379203 | ATP6V1C1        | 0.4868 |
| ENSP00000341942 | ATP13A5         | 0.4868 |
| ENSP00000345808 | ARHGAP12        | 0.4868 |
| ENSP00000219919 | AQP9            | 0.4868 |
| ENSP00000252486 | APOE            | 0.4868 |
| ENSP00000445688 | ANKRD65         | 0.4868 |
| ENSP00000351416 | ANKRD17         | 0.4868 |
| ENSP00000471417 | ANKDD1B         | 0.4868 |
| ENSP00000380793 | ALG3            | 0.4868 |
| ENSP00000387123 | ALDH7A1         | 0.4868 |
| ENSP00000273430 | AGTR1           | 0.4868 |
| ENSP00000362287 | AGO3            | 0.4868 |
| ENSP00000362888 | ADO             | 0.4868 |
| ENSP00000284984 | ADAMTS1         | 0.4868 |
| ENSP00000289416 | ACSM3           | 0.4868 |
| ENSP00000386456 | AAK1            | 0.4868 |
| ENSP00000415398 | ENSG00000236954 | 0.4868 |
| ENSP00000302855 | ZNF280A         | 0.4842 |
| ENSP00000441410 | ZNF135          | 0.4842 |
| ENSP00000265069 | ZFR             | 0.4842 |
| ENSP00000261749 | ZFAND6          | 0.4842 |
| ENSP00000314619 | ZFAND2A         | 0.4842 |
| ENSP00000342011 | XRCC4           | 0.4842 |
| ENSP00000384290 | WDR60           | 0.4842 |
| ENSP00000314444 | WDR35           | 0.4842 |
| ENSP00000358126 | VPS45           | 0.4842 |
| ENSP00000327650 | VPS33B          | 0.4842 |
| ENSP00000351346 | VPS13B          | 0.4842 |
| ENSP00000248444 | VIL1            | 0.4842 |
| ENSP00000260187 | USP2            | 0.4842 |
| ENSP00000330032 | UPP1            | 0.4842 |
| ENSP00000420270 | UHMK1           | 0.4842 |
| ENSP00000265339 | UBE2B           | 0.4842 |
| ENSP00000217515 | TXNL1           | 0.4842 |

|                 |              |        |
|-----------------|--------------|--------|
| ENSP00000417919 | TSPYL6       | 0.4842 |
| ENSP00000357597 | TSPYL1       | 0.4842 |
| ENSP00000363390 | TRIM63       | 0.4842 |
| ENSP00000392495 | TRAPPC2      | 0.4842 |
| ENSP00000407182 | TNPO2        | 0.4842 |
| ENSP00000260867 | TIMM23       | 0.4842 |
| ENSP00000318502 | TGIF2LY      | 0.4842 |
| ENSP00000338127 | TESK1        | 0.4842 |
| ENSP00000454836 | TBL3         | 0.4842 |
| ENSP00000343610 | SYNRG        | 0.4842 |
| ENSP00000266971 | SUOX         | 0.4842 |
| ENSP00000318635 | SUMO4        | 0.4842 |
| ENSP00000259400 | STX17        | 0.4842 |
| ENSP00000466298 | STX10        | 0.4842 |
| ENSP00000300737 | STIM1        | 0.4842 |
| ENSP00000216484 | SPTLC2       | 0.4842 |
| ENSP00000317790 | SPTBN5       | 0.4842 |
| ENSP00000217381 | SNTA1        | 0.4842 |
| ENSP00000270349 | SLC6A3       | 0.4842 |
| ENSP00000298472 | SLC18A2      | 0.4842 |
| ENSP00000202967 | SIRT4        | 0.4842 |
| ENSP00000366936 | SHB          | 0.4842 |
| ENSP00000415332 | SESTD1       | 0.4842 |
| ENSP00000402527 | SENP6        | 0.4842 |
| ENSP00000300175 | SCG5         | 0.4842 |
| ENSP00000356146 | SCAF8        | 0.4842 |
| ENSP00000262584 | RPL8         | 0.4842 |
| ENSP00000361076 | RPL7A        | 0.4842 |
| ENSP00000454454 | RP11-512M8.5 | 0.4842 |
| ENSP00000304051 | RNF139       | 0.4842 |
| ENSP00000422846 | RNASET2      | 0.4842 |
| ENSP00000331871 | RHD          | 0.4842 |
| ENSP00000259406 | RGS3         | 0.4842 |
| ENSP00000297313 | RGS20        | 0.4842 |
| ENSP00000330842 | RGPD6        | 0.4842 |
| ENSP00000368664 | RGCC         | 0.4842 |
| ENSP00000254325 | RFX1         | 0.4842 |
| ENSP00000226193 | RCVRN        | 0.4842 |
| ENSP00000386226 | RBM34        | 0.4842 |
| ENSP00000352956 | RBM23        | 0.4842 |
| ENSP00000327583 | RANBP1       | 0.4842 |
| ENSP00000353198 | PYY          | 0.4842 |
| ENSP00000418661 | PTRH1        | 0.4842 |
| ENSP00000334928 | PTPRB        | 0.4842 |
| ENSP00000450995 | PTCD1        | 0.4842 |
| ENSP00000339764 | PRDM8        | 0.4842 |
| ENSP00000261475 | PPP2R3C      | 0.4842 |
| ENSP00000375080 | PPP2R3B      | 0.4842 |
| ENSP00000361642 | PPCS         | 0.4842 |
| ENSP00000296028 | PPBP         | 0.4842 |
| ENSP00000350249 | POT1         | 0.4842 |
| ENSP00000363284 | POLE3        | 0.4842 |
| ENSP00000216177 | PNPLA5       | 0.4842 |

|                 |          |        |
|-----------------|----------|--------|
| ENSP00000424417 | PLRG1    | 0.4842 |
| ENSP00000333142 | PLA2G6   | 0.4842 |
| ENSP00000313504 | PHKB     | 0.4842 |
| ENSP00000218343 | PHF16    | 0.4842 |
| ENSP00000251757 | PHC1     | 0.4842 |
| ENSP00000297283 | PGAM2    | 0.4842 |
| ENSP00000387536 | PDK3     | 0.4842 |
| ENSP00000251630 | PDGFRL   | 0.4842 |
| ENSP00000368439 | PCYT1B   | 0.4842 |
| ENSP00000356348 | PCMT1    | 0.4842 |
| ENSP00000300146 | PATL1    | 0.4842 |
| ENSP00000353512 | PARP9    | 0.4842 |
| ENSP00000343144 | PARD6G   | 0.4842 |
| ENSP00000296783 | PAPD4    | 0.4842 |
| ENSP00000310305 | P2RY2    | 0.4842 |
| ENSP00000360270 | OMA1     | 0.4842 |
| ENSP00000319664 | NUDC     | 0.4842 |
| ENSP00000319788 | NQO1     | 0.4842 |
| ENSP00000365663 | NPPA     | 0.4842 |
| ENSP00000405290 | NPAS1    | 0.4842 |
| ENSP00000287139 | NODAL    | 0.4842 |
| ENSP00000383210 | NEK3     | 0.4842 |
| ENSP00000327268 | NDUFV2   | 0.4842 |
| ENSP00000315774 | NDUFS8   | 0.4842 |
| ENSP00000290231 | NCOA5    | 0.4842 |
| ENSP00000379680 | NAGA     | 0.4842 |
| ENSP00000261435 | N4BP2    | 0.4842 |
| ENSP00000302811 | MTNR1A   | 0.4842 |
| ENSP00000354728 | MT-ND4L  | 0.4842 |
| ENSP00000379108 | MTHFD2L  | 0.4842 |
| ENSP00000295491 | MRPS18C  | 0.4842 |
| ENSP00000229238 | MRPL51   | 0.4842 |
| ENSP00000312311 | MRPL46   | 0.4842 |
| ENSP00000260102 | MRPL15   | 0.4842 |
| ENSP00000372445 | METTL17  | 0.4842 |
| ENSP00000384369 | METTL15  | 0.4842 |
| ENSP00000290663 | MED8     | 0.4842 |
| ENSP00000256379 | MED6     | 0.4842 |
| ENSP00000291688 | MCM3AP   | 0.4842 |
| ENSP00000244217 | MCEE     | 0.4842 |
| ENSP00000156825 | MBD3     | 0.4842 |
| ENSP00000326817 | LRRC57   | 0.4842 |
| ENSP00000366886 | KLHL21   | 0.4842 |
| ENSP00000356319 | KIF14    | 0.4842 |
| ENSP00000309501 | KIAA1239 | 0.4842 |
| ENSP00000305824 | KCNS3    | 0.4842 |
| ENSP00000385478 | ISPD     | 0.4842 |
| ENSP00000327889 | INTS5    | 0.4842 |
| ENSP00000344192 | IL17A    | 0.4842 |
| ENSP00000392985 | HTATIP2  | 0.4842 |
| ENSP00000358421 | HSD3B1   | 0.4842 |
| ENSP00000336856 | HMG20A   | 0.4842 |
| ENSP00000299163 | HIF1AN   | 0.4842 |

|                 |          |        |
|-----------------|----------|--------|
| ENSP00000265395 | HIBADH   | 0.4842 |
| ENSP00000261047 | GUCA1C   | 0.4842 |
| ENSP00000216951 | GSS      | 0.4842 |
| ENSP00000324693 | GRHL1    | 0.4842 |
| ENSP00000346103 | GPX4     | 0.4842 |
| ENSP00000355146 | GPRASP1  | 0.4842 |
| ENSP00000383382 | GP1BB    | 0.4842 |
| ENSP00000354900 | GJB1     | 0.4842 |
| ENSP00000401018 | GIN3     | 0.4842 |
| ENSP00000320815 | GDPD4    | 0.4842 |
| ENSP00000288985 | ERCC6L2  | 0.4842 |
| ENSP00000259486 | ENPP2    | 0.4842 |
| ENSP00000295066 | DPY30    | 0.4842 |
| ENSP00000347716 | DPF1     | 0.4842 |
| ENSP00000365007 | DNAJC16  | 0.4842 |
| ENSP00000260818 | DNAJC13  | 0.4842 |
| ENSP00000373825 | DNAH2    | 0.4842 |
| ENSP00000327975 | DHRS7C   | 0.4842 |
| ENSP00000328036 | DGAT2L6  | 0.4842 |
| ENSP00000306528 | DESI2    | 0.4842 |
| ENSP00000307126 | DEGS2    | 0.4842 |
| ENSP00000263579 | DCPS     | 0.4842 |
| ENSP00000423602 | DAPP1    | 0.4842 |
| ENSP00000221307 | CYP4F3   | 0.4842 |
| ENSP00000261726 | CUX2     | 0.4842 |
| ENSP00000350911 | CTSE     | 0.4842 |
| ENSP00000368140 | CRLS1    | 0.4842 |
| ENSP00000315013 | CRAT     | 0.4842 |
| ENSP00000359603 | COL24A1  | 0.4842 |
| ENSP00000375069 | COL23A1  | 0.4842 |
| ENSP00000310003 | CNIH2    | 0.4842 |
| ENSP00000471505 | CKS1B    | 0.4842 |
| ENSP00000221476 | CKM      | 0.4842 |
| ENSP00000333873 | CIB1     | 0.4842 |
| ENSP00000283122 | CETN3    | 0.4842 |
| ENSP00000251108 | CDADC1   | 0.4842 |
| ENSP00000304236 | CD14     | 0.4842 |
| ENSP00000225603 | CBX1     | 0.4842 |
| ENSP00000352561 | CALCR    | 0.4842 |
| ENSP00000295379 | BMP10    | 0.4842 |
| ENSP00000347232 | BLM      | 0.4842 |
| ENSP00000318351 | BCKDHB   | 0.4842 |
| ENSP00000358554 | BCAS2    | 0.4842 |
| ENSP00000264499 | BBS7     | 0.4842 |
| ENSP00000292095 | BACE1    | 0.4842 |
| ENSP00000306410 | ARMC4    | 0.4842 |
| ENSP00000377769 | ARL13B   | 0.4842 |
| ENSP00000320038 | ARHGAP33 | 0.4842 |
| ENSP00000156471 | AQR      | 0.4842 |
| ENSP00000297988 | AQP7     | 0.4842 |
| ENSP00000301455 | ANGPTL4  | 0.4842 |
| ENSP00000360149 | ALG6     | 0.4842 |
| ENSP00000340009 | ALG1L    | 0.4842 |

|                 |               |        |
|-----------------|---------------|--------|
| ENSP00000470087 | AC006486.9    | 0.4842 |
| ENSP00000400587 | AC005008.2    | 0.4842 |
| ENSP00000280560 | ABCB9         | 0.4842 |
| ENSP00000354518 | ZNF830        | 0.4816 |
| ENSP00000287727 | ZFYVE9        | 0.4816 |
| ENSP00000296127 | ZDHHC3        | 0.4816 |
| ENSP00000262577 | ZC3H3         | 0.4816 |
| ENSP00000246914 | WNK4          | 0.4816 |
| ENSP00000355510 | WDR64         | 0.4816 |
| ENSP00000423067 | WDR36         | 0.4816 |
| ENSP00000409952 | VPS52         | 0.4816 |
| ENSP00000320957 | VGLL2         | 0.4816 |
| ENSP00000417175 | VAPB          | 0.4816 |
| ENSP00000289865 | USP21         | 0.4816 |
| ENSP00000287156 | UBE2L6        | 0.4816 |
| ENSP00000434516 | TXNRD1        | 0.4816 |
| ENSP00000262120 | TWSG1         | 0.4816 |
| ENSP00000362386 | TTC16         | 0.4816 |
| ENSP00000355621 | TTC13         | 0.4816 |
| ENSP00000374399 | TRMT61A       | 0.4816 |
| ENSP00000401946 | TNRC6B        | 0.4816 |
| ENSP00000296861 | TNFRSF21      | 0.4816 |
| ENSP00000417517 | TLR9          | 0.4816 |
| ENSP00000340089 | TLR5          | 0.4816 |
| ENSP00000378332 | TGFB1I1       | 0.4816 |
| ENSP00000365431 | TCF19         | 0.4816 |
| ENSP00000246080 | TCF15         | 0.4816 |
| ENSP00000225504 | SUPT4H1       | 0.4816 |
| ENSP00000385616 | SUN2          | 0.4816 |
| ENSP00000457522 | STX16-NPEPL1  | 0.4816 |
| ENSP00000217961 | STS           | 0.4816 |
| ENSP00000218089 | STAG2         | 0.4816 |
| ENSP00000295702 | SSR2          | 0.4816 |
| ENSP00000280098 | SPOPL         | 0.4816 |
| ENSP00000302812 | SP7           | 0.4816 |
| ENSP00000385746 | SMS           | 0.4816 |
| ENSP00000340409 | SMPD1         | 0.4816 |
| ENSP00000367123 | SLC3A2        | 0.4816 |
| ENSP00000368981 | SLC35B3       | 0.4816 |
| ENSP00000352456 | SLC33A1       | 0.4816 |
| ENSP00000307859 | SLC22A18      | 0.4816 |
| ENSP00000419362 | SHOX2         | 0.4816 |
| ENSP00000215793 | SF3A1         | 0.4816 |
| ENSP00000284951 | SEL1L2        | 0.4816 |
| ENSP00000353292 | SCNN1A        | 0.4816 |
| ENSP00000344106 | RTN3          | 0.4816 |
| ENSP00000260563 | RTCA          | 0.4816 |
| ENSP00000468690 | RP11-618P17.4 | 0.4816 |
| ENSP00000452401 | RP11-47I22.4  | 0.4816 |
| ENSP00000220676 | RP1           | 0.4816 |
| ENSP00000278833 | ROM1          | 0.4816 |
| ENSP00000386588 | RGPD3         | 0.4816 |
| ENSP00000368959 | REEP5         | 0.4816 |

|                 |          |        |
|-----------------|----------|--------|
| ENSP00000303482 | REEP4    | 0.4816 |
| ENSP00000382239 | RBM12B   | 0.4816 |
| ENSP00000348632 | RBCK1    | 0.4816 |
| ENSP00000386414 | RAD21L1  | 0.4816 |
| ENSP00000309116 | PTPN7    | 0.4816 |
| ENSP00000332274 | PTP4A3   | 0.4816 |
| ENSP00000361547 | PRRX2    | 0.4816 |
| ENSP00000399970 | PPP2R2D  | 0.4816 |
| ENSP00000234038 | PPP1R7   | 0.4816 |
| ENSP00000350098 | POP5     | 0.4816 |
| ENSP00000339529 | POP1     | 0.4816 |
| ENSP00000303088 | POLR3D   | 0.4816 |
| ENSP00000368349 | POLA1    | 0.4816 |
| ENSP00000263657 | PNO1     | 0.4816 |
| ENSP00000070846 | PKP2     | 0.4816 |
| ENSP00000322218 | PITPNM2  | 0.4816 |
| ENSP00000359683 | PI4K2A   | 0.4816 |
| ENSP00000329933 | PHF12    | 0.4816 |
| ENSP00000298198 | PGM2L1   | 0.4816 |
| ENSP00000404676 | PGGT1B   | 0.4816 |
| ENSP00000364145 | PFKFB1   | 0.4816 |
| ENSP00000346725 | PES1     | 0.4816 |
| ENSP00000282493 | PDZD2    | 0.4816 |
| ENSP00000312634 | PDLIM2   | 0.4816 |
| ENSP00000307241 | PDHB     | 0.4816 |
| ENSP00000305556 | PCBP1    | 0.4816 |
| ENSP00000221265 | PAF1     | 0.4816 |
| ENSP00000007414 | OSBPL7   | 0.4816 |
| ENSP00000320291 | OSBPL1A  | 0.4816 |
| ENSP00000330862 | OPCML    | 0.4816 |
| ENSP00000366519 | NSUN6    | 0.4816 |
| ENSP00000438378 | NRK      | 0.4816 |
| ENSP00000356355 | NEK7     | 0.4816 |
| ENSP00000311997 | NEFH     | 0.4816 |
| ENSP00000233627 | NDUFS7   | 0.4816 |
| ENSP00000362616 | NAP1L2   | 0.4816 |
| ENSP00000249442 | MTX2     | 0.4816 |
| ENSP00000312244 | MSL3     | 0.4816 |
| ENSP00000390331 | MRPS17   | 0.4816 |
| ENSP00000339844 | MRPL43   | 0.4816 |
| ENSP00000361084 | MRPL14   | 0.4816 |
| ENSP00000331310 | MORF4L1  | 0.4816 |
| ENSP00000299855 | MMP3     | 0.4816 |
| ENSP00000261758 | MESDC2   | 0.4816 |
| ENSP00000251871 | MED17    | 0.4816 |
| ENSP00000233121 | MAPRE3   | 0.4816 |
| ENSP00000241014 | MAPK8IP1 | 0.4816 |
| ENSP00000240304 | LUC7L3   | 0.4816 |
| ENSP00000270115 | LRRC56   | 0.4816 |
| ENSP00000291592 | LRRC3    | 0.4816 |
| ENSP00000384665 | LPAR2    | 0.4816 |
| ENSP00000351755 | LPAR1    | 0.4816 |
| ENSP00000310431 | LMAN1L   | 0.4816 |

|                 |          |        |
|-----------------|----------|--------|
| ENSP00000361007 | LIPJ     | 0.4816 |
| ENSP00000359691 | LGSN     | 0.4816 |
| ENSP00000454071 | LDLR     | 0.4816 |
| ENSP00000321997 | LARP1B   | 0.4816 |
| ENSP00000348704 | KPNA5    | 0.4816 |
| ENSP00000393963 | KIFC1    | 0.4816 |
| ENSP00000387875 | KIF4B    | 0.4816 |
| ENSP00000363232 | KIF12    | 0.4816 |
| ENSP00000194118 | KIAA0141 | 0.4816 |
| ENSP00000216039 | JOSD1    | 0.4816 |
| ENSP00000380692 | JHDM1D   | 0.4816 |
| ENSP00000341280 | JARID2   | 0.4816 |
| ENSP00000418397 | IVD      | 0.4816 |
| ENSP00000266646 | INHBE    | 0.4816 |
| ENSP00000416683 | IGFALS   | 0.4816 |
| ENSP00000319623 | IGDCC4   | 0.4816 |
| ENSP00000362121 | IFT52    | 0.4816 |
| ENSP00000263642 | IFIH1    | 0.4816 |
| ENSP00000265986 | IDE      | 0.4816 |
| ENSP00000358424 | HSD3B2   | 0.4816 |
| ENSP00000312625 | HP1BP3   | 0.4816 |
| ENSP00000278715 | HMBS     | 0.4816 |
| ENSP00000230361 | GUCA1B   | 0.4816 |
| ENSP00000303997 | GTPBP2   | 0.4816 |
| ENSP00000288955 | GRHL3    | 0.4816 |
| ENSP00000334952 | GPR125   | 0.4816 |
| ENSP00000203556 | GMIP     | 0.4816 |
| ENSP00000350757 | GMFB     | 0.4816 |
| ENSP00000368119 | GALT     | 0.4816 |
| ENSP00000352738 | G3BP2    | 0.4816 |
| ENSP00000274963 | FGD2     | 0.4816 |
| ENSP00000244426 | FBXO9    | 0.4816 |
| ENSP00000229758 | FBXO5    | 0.4816 |
| ENSP00000406229 | FAT1     | 0.4816 |
| ENSP00000368984 | EXOSC9   | 0.4816 |
| ENSP00000369409 | EXOC3L4  | 0.4816 |
| ENSP00000325674 | EXOC3L1  | 0.4816 |
| ENSP00000311873 | EXO1     | 0.4816 |
| ENSP00000266517 | ETNK1    | 0.4816 |
| ENSP00000306999 | ESCO2    | 0.4816 |
| ENSP00000269214 | ESCO1    | 0.4816 |
| ENSP00000375809 | ERCC2    | 0.4816 |
| ENSP00000013807 | ERCC1    | 0.4816 |
| ENSP00000263735 | EPCAM    | 0.4816 |
| ENSP00000352162 | ELAVL3   | 0.4816 |
| ENSP00000436049 | EIF3M    | 0.4816 |
| ENSP00000370258 | EIF3CL   | 0.4816 |
| ENSP00000346964 | EGFLAM   | 0.4816 |
| ENSP00000301727 | E4F1     | 0.4816 |
| ENSP00000258198 | DYNC1LI2 | 0.4816 |
| ENSP00000451253 | DUX4L6   | 0.4816 |
| ENSP00000240100 | DUSP4    | 0.4816 |
| ENSP00000280904 | DSC2     | 0.4816 |



|                 |             |        |
|-----------------|-------------|--------|
| ENSP00000307197 | DNAJB7      | 0.4816 |
| ENSP00000280886 | DIP2C       | 0.4816 |
| ENSP00000225296 | DHX33       | 0.4816 |
| ENSP00000362795 | CXCR3       | 0.4816 |
| ENSP00000291554 | CRYAA       | 0.4816 |
| ENSP00000276571 | CRH         | 0.4816 |
| ENSP00000315775 | COG4        | 0.4816 |
| ENSP00000360939 | CMPK1       | 0.4816 |
| ENSP00000221455 | CLASRP      | 0.4816 |
| ENSP00000443140 | CHURC1-FNTB | 0.4816 |
| ENSP00000297265 | CHMP4C      | 0.4816 |
| ENSP00000326238 | CAPZA3      | 0.4816 |
| ENSP00000380349 | CAPN3       | 0.4816 |
| ENSP00000262138 | CACNG4      | 0.4816 |
| ENSP00000328173 | C1S         | 0.4816 |
| ENSP00000361577 | C10orf11    | 0.4816 |
| ENSP00000252593 | BST2        | 0.4816 |
| ENSP00000362372 | BRWD3       | 0.4816 |
| ENSP00000314132 | BOK         | 0.4816 |
| ENSP00000393840 | BLOC1S3     | 0.4816 |
| ENSP00000353458 | BAZ1A       | 0.4816 |
| ENSP00000321195 | ATP11B      | 0.4816 |
| ENSP00000269197 | ASXL3       | 0.4816 |
| ENSP00000364694 | ASPN        | 0.4816 |
| ENSP00000264607 | ASB1        | 0.4816 |
| ENSP00000355060 | ARHGEF10L   | 0.4816 |
| ENSP00000296456 | APEH        | 0.4816 |
| ENSP00000379802 | AMPD3       | 0.4816 |
| ENSP00000387739 | AMOTL1      | 0.4816 |
| ENSP00000296486 | AGXT2L1     | 0.4816 |
| ENSP00000331944 | AEN         | 0.4816 |
| ENSP00000238561 | ADCK1       | 0.4816 |
| ENSP00000359958 | ZRANB2      | 0.4789 |
| ENSP00000282388 | ZFP36L2     | 0.4789 |
| ENSP00000337393 | UXT         | 0.4789 |
| ENSP00000207549 | UNC13D      | 0.4789 |
| ENSP00000356982 | UFC1        | 0.4789 |
| ENSP00000429084 | UBR5        | 0.4789 |
| ENSP00000359525 | UBE2NL      | 0.4789 |
| ENSP00000253023 | UBE2M       | 0.4789 |
| ENSP00000283033 | TXNDC11     | 0.4789 |
| ENSP00000231238 | TTC1        | 0.4789 |
| ENSP00000322802 | TSPYL5      | 0.4789 |
| ENSP00000410943 | TSPYL4      | 0.4789 |
| ENSP00000399668 | TSPY4       | 0.4789 |
| ENSP00000309036 | TSPAN17     | 0.4789 |
| ENSP00000379144 | TNRC6A      | 0.4789 |
| ENSP00000265388 | TNPO3       | 0.4789 |
| ENSP00000294543 | TMCO4       | 0.4789 |
| ENSP00000356807 | TIPRL       | 0.4789 |
| ENSP00000379999 | TIMM17B     | 0.4789 |
| ENSP00000317334 | TCP1        | 0.4789 |
| ENSP00000355560 | TBCE        | 0.4789 |

|                 |           |        |
|-----------------|-----------|--------|
| ENSP00000221855 | TBCB      | 0.4789 |
| ENSP00000386921 | TBC1D14   | 0.4789 |
| ENSP00000310094 | TAOK2     | 0.4789 |
| ENSP00000362403 | TACR2     | 0.4789 |
| ENSP00000288422 | TAB3      | 0.4789 |
| ENSP00000263688 | SUCO      | 0.4789 |
| ENSP00000263955 | STK17B    | 0.4789 |
| ENSP00000302978 | SPRY3     | 0.4789 |
| ENSP00000321108 | SPOCK2    | 0.4789 |
| ENSP00000263694 | SNRNP40   | 0.4789 |
| ENSP00000371297 | SNPH      | 0.4789 |
| ENSP00000366641 | SLC2A5    | 0.4789 |
| ENSP00000305529 | SIRPG     | 0.4789 |
| ENSP00000263593 | SIAE      | 0.4789 |
| ENSP00000278407 | SERPING1  | 0.4789 |
| ENSP00000330812 | SDR42E2   | 0.4789 |
| ENSP00000462116 | SAP30BP   | 0.4789 |
| ENSP00000305416 | S1PR1     | 0.4789 |
| ENSP00000267484 | RTN1      | 0.4789 |
| ENSP00000223862 | RLN1      | 0.4789 |
| ENSP00000356429 | RGS1      | 0.4789 |
| ENSP00000452126 | RGMA      | 0.4789 |
| ENSP00000306335 | RFX2      | 0.4789 |
| ENSP00000221515 | RETN      | 0.4789 |
| ENSP00000418070 | PVRL3     | 0.4789 |
| ENSP00000355923 | PTPN14    | 0.4789 |
| ENSP00000295901 | PSMD6     | 0.4789 |
| ENSP00000257181 | PRPF38A   | 0.4789 |
| ENSP00000302114 | PRELID1   | 0.4789 |
| ENSP00000335083 | PPP2R2C   | 0.4789 |
| ENSP00000343943 | PPOX      | 0.4789 |
| ENSP00000299853 | POLR3E    | 0.4789 |
| ENSP00000356104 | PM20D1    | 0.4789 |
| ENSP00000263946 | PKP1      | 0.4789 |
| ENSP00000350676 | PHF8      | 0.4789 |
| ENSP00000378784 | PHF20L1   | 0.4789 |
| ENSP00000315680 | PEX7      | 0.4789 |
| ENSP00000005178 | PDK4      | 0.4789 |
| ENSP00000466214 | PDCD5     | 0.4789 |
| ENSP00000358862 | PCGF6     | 0.4789 |
| ENSP00000257789 | ORC3      | 0.4789 |
| ENSP00000464146 | OAZ1      | 0.4789 |
| ENSP00000254998 | NXT1      | 0.4789 |
| ENSP00000361658 | NUP188    | 0.4789 |
| ENSP00000365160 | NUDT11    | 0.4789 |
| ENSP00000301411 | NTF4      | 0.4789 |
| ENSP00000320089 | NKX2-6    | 0.4789 |
| ENSP00000238616 | NEK9      | 0.4789 |
| ENSP00000218652 | NDFIP2    | 0.4789 |
| ENSP00000369915 | NAP1L4    | 0.4789 |
| ENSP00000468991 | MTRNR2L12 | 0.4789 |
| ENSP00000354961 | MT-ND4    | 0.4789 |
| ENSP00000255087 | MTL5      | 0.4789 |

|                 |           |        |
|-----------------|-----------|--------|
| ENSP00000414287 | MST1      | 0.4789 |
| ENSP00000285298 | MRPS17    | 0.4789 |
| ENSP00000417602 | MRPL47    | 0.4789 |
| ENSP00000233545 | MPV17     | 0.4789 |
| ENSP00000416015 | MICAL3    | 0.4789 |
| ENSP00000297347 | MED30     | 0.4789 |
| ENSP00000357047 | MED23     | 0.4789 |
| ENSP00000325612 | MED16     | 0.4789 |
| ENSP00000308383 | LSP1      | 0.4789 |
| ENSP00000250173 | LRRC6     | 0.4789 |
| ENSP00000283415 | LPCAT1    | 0.4789 |
| ENSP00000301159 | LIN37     | 0.4789 |
| ENSP00000339916 | LIMK2     | 0.4789 |
| ENSP00000355785 | LEFTY2    | 0.4789 |
| ENSP00000363944 | LAS1L     | 0.4789 |
| ENSP00000359074 | LICAM     | 0.4789 |
| ENSP00000287152 | KIF6      | 0.4789 |
| ENSP00000272117 | ITPKB     | 0.4789 |
| ENSP00000273283 | ITIH1     | 0.4789 |
| ENSP00000318641 | INTS3     | 0.4789 |
| ENSP00000385722 | INTS1     | 0.4789 |
| ENSP00000233331 | INO80B    | 0.4789 |
| ENSP00000284202 | IMPACT    | 0.4789 |
| ENSP00000005558 | IFRD1     | 0.4789 |
| ENSP00000262626 | HPN       | 0.4789 |
| ENSP00000295256 | HPGDS     | 0.4789 |
| ENSP00000398890 | HLA-DMB   | 0.4789 |
| ENSP00000328484 | HIST1H2AJ | 0.4789 |
| ENSP00000359454 | HFM1      | 0.4789 |
| ENSP00000361180 | GTF3C5    | 0.4789 |
| ENSP00000314380 | GRINA     | 0.4789 |
| ENSP00000332549 | GRIN2A    | 0.4789 |
| ENSP00000397351 | GRID2IP   | 0.4789 |
| ENSP00000319286 | GP5       | 0.4789 |
| ENSP00000284116 | GDPD1     | 0.4789 |
| ENSP00000358451 | GDAP2     | 0.4789 |
| ENSP00000282538 | GADL1     | 0.4789 |
| ENSP00000305692 | GAA       | 0.4789 |
| ENSP00000305603 | FUT3      | 0.4789 |
| ENSP00000375748 | FUT2      | 0.4789 |
| ENSP00000396673 | FTSJ3     | 0.4789 |
| ENSP00000295633 | FSTL1     | 0.4789 |
| ENSP00000254122 | FSHB      | 0.4789 |
| ENSP00000220584 | FDFT1     | 0.4789 |
| ENSP00000377280 | FBXO8     | 0.4789 |
| ENSP00000364486 | FBP2      | 0.4789 |
| ENSP00000321951 | FAIM2     | 0.4789 |
| ENSP00000321326 | F2R       | 0.4789 |
| ENSP00000379032 | EXT2      | 0.4789 |
| ENSP00000341743 | ENSA      | 0.4789 |
| ENSP00000345974 | ENOSF1    | 0.4789 |
| ENSP00000426741 | EFNA3     | 0.4789 |
| ENSP00000347596 | EFEMP1    | 0.4789 |

|                 |              |        |
|-----------------|--------------|--------|
| ENSP00000380597 | EEF1E1-MUTED | 0.4789 |
| ENSP00000356920 | DUSP12       | 0.4789 |
| ENSP00000332151 | DSE          | 0.4789 |
| ENSP00000353608 | DSC3         | 0.4789 |
| ENSP00000362041 | DNAJC9       | 0.4789 |
| ENSP00000296097 | DNAJC5G      | 0.4789 |
| ENSP00000396896 | DNAJC4       | 0.4789 |
| ENSP00000344431 | DNAJB13      | 0.4789 |
| ENSP00000252011 | DHX35        | 0.4789 |
| ENSP00000297436 | DEFA6        | 0.4789 |
| ENSP00000359151 | DBT          | 0.4789 |
| ENSP00000260327 | CTDSPL2      | 0.4789 |
| ENSP00000316416 | CSH1         | 0.4789 |
| ENSP00000381333 | CRHR1        | 0.4789 |
| ENSP00000264828 | COL5A3       | 0.4789 |
| ENSP00000259938 | CLPS         | 0.4789 |
| ENSP00000290332 | CLIC6        | 0.4789 |
| ENSP00000432279 | CHMP1B       | 0.4789 |
| ENSP00000358595 | CGA          | 0.4789 |
| ENSP00000284382 | CERS3        | 0.4789 |
| ENSP00000271332 | CELSR2       | 0.4789 |
| ENSP00000398880 | CDK12        | 0.4789 |
| ENSP00000371689 | CDH12        | 0.4789 |
| ENSP00000339393 | CCR6         | 0.4789 |
| ENSP00000259607 | CCL21        | 0.4789 |
| ENSP00000221554 | CCDC130      | 0.4789 |
| ENSP00000386959 | CAPS2        | 0.4789 |
| ENSP00000335320 | BCL9L        | 0.4789 |
| ENSP00000357748 | BCCIP        | 0.4789 |
| ENSP00000300404 | B4GALNT2     | 0.4789 |
| ENSP00000376965 | ATXN3        | 0.4789 |
| ENSP00000290949 | ATP6V0D1     | 0.4789 |
| ENSP00000321388 | ASB4         | 0.4789 |
| ENSP00000311165 | AQP1         | 0.4789 |
| ENSP00000338777 | AP3S2        | 0.4789 |
| ENSP00000339109 | ANAPC1       | 0.4789 |
| ENSP00000239891 | ALG5         | 0.4789 |
| ENSP00000345774 | ALDH3A2      | 0.4789 |
| ENSP00000393887 | AHSG         | 0.4789 |
| ENSP00000314036 | AGPAT4       | 0.4789 |
| ENSP00000304501 | ADORA2B      | 0.4789 |
| ENSP00000278175 | ADM          | 0.4789 |
| ENSP00000379865 | ADHFE1       | 0.4789 |
| ENSP00000219054 | ACSM2A       | 0.4789 |
| ENSP00000323036 | ACPP         | 0.4789 |
| ENSP00000367086 | ACOT7        | 0.4789 |
| ENSP00000366084 | ABCC4        | 0.4789 |
| ENSP00000324842 | AACS         | 0.4789 |
| ENSP00000348419 | ZNF44        | 0.4763 |
| ENSP00000337159 | ZFYVE16      | 0.4763 |
| ENSP00000261015 | WDR12        | 0.4763 |
| ENSP00000387230 | UPP2         | 0.4763 |
| ENSP00000323740 | UCP3         | 0.4763 |

|                 |               |        |
|-----------------|---------------|--------|
| ENSP00000382982 | TUBA3C        | 0.4763 |
| ENSP00000398803 | TSTA3         | 0.4763 |
| ENSP00000252015 | TRPC4AP       | 0.4763 |
| ENSP00000261884 | TRIP4         | 0.4763 |
| ENSP00000442778 | TRAPPC2P1     | 0.4763 |
| ENSP00000299608 | TMX3          | 0.4763 |
| ENSP00000371376 | TLR6          | 0.4763 |
| ENSP00000326531 | THOC6         | 0.4763 |
| ENSP00000364037 | TEX10         | 0.4763 |
| ENSP00000221543 | TBC1D17       | 0.4763 |
| ENSP00000357075 | TAGLN2        | 0.4763 |
| ENSP00000225396 | TADA2A        | 0.4763 |
| ENSP00000357307 | SYT11         | 0.4763 |
| ENSP00000233025 | SPCS1         | 0.4763 |
| ENSP00000323439 | SMC6          | 0.4763 |
| ENSP00000354957 | SMC5          | 0.4763 |
| ENSP00000392617 | SMARCD2       | 0.4763 |
| ENSP00000328940 | SLX1B         | 0.4763 |
| ENSP00000417654 | SLC35A5       | 0.4763 |
| ENSP00000366797 | SLC22A12      | 0.4763 |
| ENSP00000340465 | SLC20A2       | 0.4763 |
| ENSP00000248566 | SHFM1         | 0.4763 |
| ENSP00000248929 | SGSM3         | 0.4763 |
| ENSP00000361366 | SFTPD         | 0.4763 |
| ENSP00000321674 | SEPT4         | 0.4763 |
| ENSP00000264454 | SEC22C        | 0.4763 |
| ENSP00000255858 | SEC14L4       | 0.4763 |
| ENSP00000257549 | SDS           | 0.4763 |
| ENSP00000300061 | SCNN1G        | 0.4763 |
| ENSP00000346534 | SCN8A         | 0.4763 |
| ENSP00000371471 | RSAD2         | 0.4763 |
| ENSP00000362092 | RRAGC         | 0.4763 |
| ENSP00000262850 | RRAGB         | 0.4763 |
| ENSP00000230050 | RPS12         | 0.4763 |
| ENSP00000450353 | RP11-162P23.2 | 0.4763 |
| ENSP00000380876 | RGS11         | 0.4763 |
| ENSP00000303192 | RGL1          | 0.4763 |
| ENSP00000371321 | RFC1          | 0.4763 |
| ENSP00000308699 | REC8          | 0.4763 |
| ENSP00000391121 | RDH13         | 0.4763 |
| ENSP00000364582 | RCC2          | 0.4763 |
| ENSP00000374069 | PTPRN2        | 0.4763 |
| ENSP00000321999 | PTH1R         | 0.4763 |
| ENSP00000318176 | PRKRA         | 0.4763 |
| ENSP00000363092 | PRKG1         | 0.4763 |
| ENSP00000394863 | PPT1          | 0.4763 |
| ENSP00000311677 | PPP1R8        | 0.4763 |
| ENSP00000450337 | PPFIA2        | 0.4763 |
| ENSP00000215885 | PLA2G3        | 0.4763 |
| ENSP00000312286 | PLA2G1B       | 0.4763 |
| ENSP00000349208 | PIWIL2        | 0.4763 |
| ENSP00000364204 | PINK1         | 0.4763 |
| ENSP00000359848 | PIGK          | 0.4763 |

|                 |           |        |
|-----------------|-----------|--------|
| ENSP00000345771 | PFKM      | 0.4763 |
| ENSP00000331574 | PDE1A     | 0.4763 |
| ENSP00000411825 | PDCD6IP   | 0.4763 |
| ENSP00000302814 | OTP       | 0.4763 |
| ENSP00000379804 | OSBPL10   | 0.4763 |
| ENSP00000342278 | OAS2      | 0.4763 |
| ENSP00000264670 | NSUN2     | 0.4763 |
| ENSP00000338766 | NPHP3     | 0.4763 |
| ENSP00000261797 | NDST1     | 0.4763 |
| ENSP00000393275 | NANOS1    | 0.4763 |
| ENSP00000302021 | MUC7      | 0.4763 |
| ENSP00000281047 | MSGN1     | 0.4763 |
| ENSP00000308275 | MRPL38    | 0.4763 |
| ENSP00000318318 | MPI       | 0.4763 |
| ENSP00000198801 | MOGAT2    | 0.4763 |
| ENSP00000262430 | MLYCD     | 0.4763 |
| ENSP00000352455 | MFAP5     | 0.4763 |
| ENSP00000337340 | MED19     | 0.4763 |
| ENSP00000263702 | MECR      | 0.4763 |
| ENSP00000358400 | MDN1      | 0.4763 |
| ENSP00000430487 | MATN2     | 0.4763 |
| ENSP00000360690 | LONRF3    | 0.4763 |
| ENSP00000249075 | LIF       | 0.4763 |
| ENSP00000308369 | LEMD3     | 0.4763 |
| ENSP00000304422 | KREMEN2   | 0.4763 |
| ENSP00000209884 | KLHL20    | 0.4763 |
| ENSP00000352282 | KLHDC1    | 0.4763 |
| ENSP00000307023 | KLF11     | 0.4763 |
| ENSP00000420040 | KCNIP2    | 0.4763 |
| ENSP00000295321 | IWS1      | 0.4763 |
| ENSP00000311492 | ISX       | 0.4763 |
| ENSP00000323424 | ISG20L2   | 0.4763 |
| ENSP00000273221 | IQSEC1    | 0.4763 |
| ENSP00000355205 | INO80     | 0.4763 |
| ENSP00000329384 | IL22      | 0.4763 |
| ENSP00000258774 | HUS1      | 0.4763 |
| ENSP00000321389 | HIST1H2AC | 0.4763 |
| ENSP00000340736 | GYG1      | 0.4763 |
| ENSP00000218006 | GUCY2F    | 0.4763 |
| ENSP00000279593 | GRIN2B    | 0.4763 |
| ENSP00000230056 | GMNN      | 0.4763 |
| ENSP00000240093 | FZD3      | 0.4763 |
| ENSP00000384823 | FBXO11    | 0.4763 |
| ENSP00000320604 | FAXDC2    | 0.4763 |
| ENSP00000322229 | FADS1     | 0.4763 |
| ENSP00000301607 | EVPL      | 0.4763 |
| ENSP00000357175 | ETV3      | 0.4763 |
| ENSP00000296741 | ENPP6     | 0.4763 |
| ENSP00000248378 | EMC6      | 0.4763 |
| ENSP00000220325 | EHD4      | 0.4763 |
| ENSP00000273668 | EAF2      | 0.4763 |
| ENSP00000010132 | DYRK4     | 0.4763 |
| ENSP00000451700 | DUX4L7    | 0.4763 |

|                 |            |        |
|-----------------|------------|--------|
| ENSP00000451798 | DUX4L3     | 0.4763 |
| ENSP00000346160 | DUSP19     | 0.4763 |
| ENSP00000320650 | DNAJC25    | 0.4763 |
| ENSP00000378508 | DNAJC22    | 0.4763 |
| ENSP00000249356 | DNAJB9     | 0.4763 |
| ENSP00000378324 | DNAJA4     | 0.4763 |
| ENSP00000311273 | DNAH7      | 0.4763 |
| ENSP00000401514 | DNAH1      | 0.4763 |
| ENSP00000240306 | DLX4       | 0.4763 |
| ENSP00000400258 | DLGAP2     | 0.4763 |
| ENSP00000295373 | DHX57      | 0.4763 |
| ENSP00000368173 | DHRS13     | 0.4763 |
| ENSP00000280665 | DCP1B      | 0.4763 |
| ENSP00000360958 | CYP4A22    | 0.4763 |
| ENSP00000275016 | CYP39A1    | 0.4763 |
| ENSP00000346340 | COPS8      | 0.4763 |
| ENSP00000349790 | COL9A1     | 0.4763 |
| ENSP00000221232 | CNOT3      | 0.4763 |
| ENSP00000250378 | CMA1       | 0.4763 |
| ENSP00000353475 | CLDN7      | 0.4763 |
| ENSP00000183605 | CLDN18     | 0.4763 |
| ENSP00000311083 | CKS1B      | 0.4763 |
| ENSP00000315602 | CHRNA3     | 0.4763 |
| ENSP00000255409 | CHI3L1     | 0.4763 |
| ENSP00000258969 | CHAD       | 0.4763 |
| ENSP00000319052 | CETN1      | 0.4763 |
| ENSP00000271688 | CERS2      | 0.4763 |
| ENSP00000303058 | CEP120     | 0.4763 |
| ENSP00000348527 | CENPL      | 0.4763 |
| ENSP00000293275 | CCL16      | 0.4763 |
| ENSP00000316114 | CCDC101    | 0.4763 |
| ENSP00000354812 | C9orf114   | 0.4763 |
| ENSP00000363768 | C1QC       | 0.4763 |
| ENSP00000361915 | BMP8B      | 0.4763 |
| ENSP00000375067 | BCAS3      | 0.4763 |
| ENSP00000404503 | BBC3       | 0.4763 |
| ENSP00000342434 | BAZ1B      | 0.4763 |
| ENSP00000265605 | ALDH8A1    | 0.4763 |
| ENSP00000450436 | ALDH6A1    | 0.4763 |
| ENSP00000290597 | ALDH4A1    | 0.4763 |
| ENSP00000233710 | ACADL      | 0.4763 |
| ENSP00000341237 | AC008132.1 | 0.4763 |
| ENSP00000382957 | ZNF705D    | 0.4737 |
| ENSP00000264447 | ZNF638     | 0.4737 |
| ENSP00000362527 | ZNF362     | 0.4737 |
| ENSP00000268489 | ZFHX3      | 0.4737 |
| ENSP00000285021 | XPC        | 0.4737 |
| ENSP00000226760 | WFS1       | 0.4737 |
| ENSP00000054666 | VAMP3      | 0.4737 |
| ENSP00000262946 | UQCR11     | 0.4737 |
| ENSP00000366819 | UCHL3      | 0.4737 |
| ENSP00000343001 | UBE4B      | 0.4737 |
| ENSP00000261427 | UBE2K      | 0.4737 |

|                 |          |        |
|-----------------|----------|--------|
| ENSP00000430031 | TXNRD3   | 0.4737 |
| ENSP00000380552 | TSPAN4   | 0.4737 |
| ENSP00000356476 | TRMT1L   | 0.4737 |
| ENSP00000006275 | TRAPPC6A | 0.4737 |
| ENSP00000416037 | TMPRSS4  | 0.4737 |
| ENSP00000259365 | TMOD1    | 0.4737 |
| ENSP00000261881 | TIPIN    | 0.4737 |
| ENSP00000409195 | TBC1D3H  | 0.4737 |
| ENSP00000346576 | SYTL2    | 0.4737 |
| ENSP00000249344 | STRIP2   | 0.4737 |
| ENSP00000429243 | STMN2    | 0.4737 |
| ENSP00000370891 | STK35    | 0.4737 |
| ENSP00000260956 | SSB      | 0.4737 |
| ENSP00000296215 | SNIP1    | 0.4737 |
| ENSP00000342082 | SLPI     | 0.4737 |
| ENSP00000287766 | SLC6A1   | 0.4737 |
| ENSP00000445340 | SLC5A8   | 0.4737 |
| ENSP00000470652 | SLC35E1  | 0.4737 |
| ENSP00000235345 | SLC35D1  | 0.4737 |
| ENSP00000416240 | SEBOX    | 0.4737 |
| ENSP00000265565 | SCAP     | 0.4737 |
| ENSP00000350261 | SAMD4A   | 0.4737 |
| ENSP00000357726 | S100A12  | 0.4737 |
| ENSP00000268661 | RPL3L    | 0.4737 |
| ENSP00000306637 | RGPD8    | 0.4737 |
| ENSP00000258349 | RC3H1    | 0.4737 |
| ENSP00000334813 | RAX      | 0.4737 |
| ENSP00000344936 | PTTG1    | 0.4737 |
| ENSP00000280362 | PTS      | 0.4737 |
| ENSP00000302846 | PTGER4   | 0.4737 |
| ENSP00000325919 | PSMG2    | 0.4737 |
| ENSP00000349856 | PRRC2B   | 0.4737 |
| ENSP00000315379 | PRPF3    | 0.4737 |
| ENSP00000377783 | PROS1    | 0.4737 |
| ENSP00000302478 | POLR1D   | 0.4737 |
| ENSP00000372316 | POLN     | 0.4737 |
| ENSP00000364902 | POFUT1   | 0.4737 |
| ENSP00000347038 | PLSCR4   | 0.4737 |
| ENSP00000417003 | PLEKHM3  | 0.4737 |
| ENSP00000299001 | PIWIL4   | 0.4737 |
| ENSP00000264864 | PI4K2B   | 0.4737 |
| ENSP00000216780 | PCK2     | 0.4737 |
| ENSP00000396040 | PCED1B   | 0.4737 |
| ENSP00000377527 | PC       | 0.4737 |
| ENSP00000354676 | OSTC     | 0.4737 |
| ENSP00000263847 | OSBP     | 0.4737 |
| ENSP00000306561 | OGG1     | 0.4737 |
| ENSP00000295119 | NUP35    | 0.4737 |
| ENSP00000355587 | NTPCR    | 0.4737 |
| ENSP00000337501 | NRIP2    | 0.4737 |
| ENSP00000373810 | NOP16    | 0.4737 |
| ENSP00000264230 | NOA1     | 0.4737 |
| ENSP00000364578 | NELFE    | 0.4737 |



|                 |               |        |
|-----------------|---------------|--------|
| ENSP00000389160 | NDUFA11       | 0.4737 |
| ENSP00000433681 | NCAPD3        | 0.4737 |
| ENSP00000389087 | NAGK          | 0.4737 |
| ENSP00000371221 | MTMR6         | 0.4737 |
| ENSP00000431040 | MRPL22        | 0.4737 |
| ENSP00000040663 | MRI1          | 0.4737 |
| ENSP00000306697 | MRAP          | 0.4737 |
| ENSP00000223114 | MOGAT3        | 0.4737 |
| ENSP00000263969 | MFN1          | 0.4737 |
| ENSP00000386908 | MEGF11        | 0.4737 |
| ENSP00000225728 | MED31         | 0.4737 |
| ENSP00000417235 | MED12L        | 0.4737 |
| ENSP00000007969 | LRRC23        | 0.4737 |
| ENSP00000322270 | LPHN2         | 0.4737 |
| ENSP00000433352 | LMO7          | 0.4737 |
| ENSP00000261438 | KLF3          | 0.4737 |
| ENSP00000297814 | KIF27         | 0.4737 |
| ENSP00000260363 | KIF23         | 0.4737 |
| ENSP00000263181 | KIF18A        | 0.4737 |
| ENSP00000394033 | KCNK2         | 0.4737 |
| ENSP00000360777 | INPP5E        | 0.4737 |
| ENSP00000290200 | IL10RB        | 0.4737 |
| ENSP00000240652 | IAPP          | 0.4737 |
| ENSP00000429214 | HMGB4         | 0.4737 |
| ENSP00000352442 | HIST1H2BM     | 0.4737 |
| ENSP00000366618 | HIST1H2BL     | 0.4737 |
| ENSP00000341094 | HIST1H2AD     | 0.4737 |
| ENSP00000355541 | HEATR1        | 0.4737 |
| ENSP00000355778 | H3F3A         | 0.4737 |
| ENSP00000370555 | GYG2          | 0.4737 |
| ENSP00000340823 | GTF2F2        | 0.4737 |
| ENSP00000282753 | GRM1          | 0.4737 |
| ENSP00000368305 | GPCPD1        | 0.4737 |
| ENSP00000343676 | GJA4          | 0.4737 |
| ENSP00000237527 | GHRH          | 0.4737 |
| ENSP00000253778 | GFPT2         | 0.4737 |
| ENSP00000449751 | FKBP11        | 0.4737 |
| ENSP00000403293 | FBXO43        | 0.4737 |
| ENSP00000349970 | ERGIC3        | 0.4737 |
| ENSP00000377374 | ERGIC1        | 0.4737 |
| ENSP00000365812 | EP400NL       | 0.4737 |
| ENSP00000364073 | EIF4G3        | 0.4737 |
| ENSP00000340281 | EIF4G2        | 0.4737 |
| ENSP00000361668 | EDN2          | 0.4737 |
| ENSP00000389585 | DUX4L2        | 0.4737 |
| ENSP00000363412 | DNAJC25-GNG10 | 0.4737 |
| ENSP00000338019 | DNAJB2        | 0.4737 |
| ENSP00000312554 | DNAH12        | 0.4737 |
| ENSP00000316377 | DLGAP1        | 0.4737 |
| ENSP00000273814 | DGKQ          | 0.4737 |
| ENSP00000331681 | DGCR6         | 0.4737 |
| ENSP00000323858 | DDX54         | 0.4737 |
| ENSP00000387006 | CWC22         | 0.4737 |

|                 |          |        |
|-----------------|----------|--------|
| ENSP00000321260 | COX8A    | 0.4737 |
| ENSP00000404078 | COX6A1P2 | 0.4737 |
| ENSP00000264389 | COPS4    | 0.4737 |
| ENSP00000243222 | COL10A1  | 0.4737 |
| ENSP00000353698 | CNPPD1   | 0.4737 |
| ENSP00000306579 | CERS6    | 0.4737 |
| ENSP00000216264 | CERK     | 0.4737 |
| ENSP00000262607 | CECR1    | 0.4737 |
| ENSP00000363322 | CDC26    | 0.4737 |
| ENSP00000354947 | CAPZA2   | 0.4737 |
| ENSP00000343412 | BRE      | 0.4737 |
| ENSP00000321507 | AZIN1    | 0.4737 |
| ENSP00000283558 | ATP11A   | 0.4737 |
| ENSP00000387185 | ATHL1    | 0.4737 |
| ENSP00000261168 | ATF7IP   | 0.4737 |
| ENSP00000328327 | ASB7     | 0.4737 |
| ENSP00000249822 | ARPP19   | 0.4737 |
| ENSP00000353796 | ANKRD53  | 0.4737 |
| ENSP00000249883 | AMOTL2   | 0.4737 |
| ENSP00000358807 | ALX3     | 0.4737 |
| ENSP00000374219 | ALKBH8   | 0.4737 |
| ENSP00000242375 | AKR1D1   | 0.4737 |
| ENSP00000380184 | AGPAT6   | 0.4737 |
| ENSP00000337463 | AGPAT1   | 0.4737 |
| ENSP00000343782 | ADRB3    | 0.4737 |
| ENSP00000336630 | ADORA2A  | 0.4737 |
| ENSP00000310547 | ADCK5    | 0.4737 |
| ENSP00000361965 | ADA      | 0.4737 |
| ENSP00000327453 | ACSM2B   | 0.4737 |
| ENSP00000305804 | ZNF131   | 0.4711 |
| ENSP00000273320 | ZKSCAN7  | 0.4711 |
| ENSP00000417573 | YIPF6    | 0.4711 |
| ENSP00000364270 | XPA      | 0.4711 |
| ENSP00000262139 | WIPI1    | 0.4711 |
| ENSP00000356433 | UST      | 0.4711 |
| ENSP00000434676 | USP50    | 0.4711 |
| ENSP00000407487 | UNC45A   | 0.4711 |
| ENSP00000354877 | ULK2     | 0.4711 |
| ENSP00000314655 | TSC22D3  | 0.4711 |
| ENSP00000296098 | TRIM54   | 0.4711 |
| ENSP00000284320 | TOMM70A  | 0.4711 |
| ENSP00000419704 | TIMM10B  | 0.4711 |
| ENSP00000339532 | THUMPD3  | 0.4711 |
| ENSP00000261600 | THOC1    | 0.4711 |
| ENSP00000364207 | TBC1D2   | 0.4711 |
| ENSP00000376317 | TAOK3    | 0.4711 |
| ENSP00000332287 | SYNGR1   | 0.4711 |
| ENSP00000305899 | SUV420H1 | 0.4711 |
| ENSP00000333292 | SPNS2    | 0.4711 |
| ENSP00000260197 | SORL1    | 0.4711 |
| ENSP00000339769 | SMEK2    | 0.4711 |
| ENSP00000350036 | SMC1B    | 0.4711 |
| ENSP00000299798 | SLC9A5   | 0.4711 |

|                 |         |        |
|-----------------|---------|--------|
| ENSP00000383698 | SLC2A7  | 0.4711 |
| ENSP00000272542 | SLC20A1 | 0.4711 |
| ENSP00000315137 | SGPP2   | 0.4711 |
| ENSP00000367991 | SEPT8   | 0.4711 |
| ENSP00000385695 | SEC14L6 | 0.4711 |
| ENSP00000301761 | SDHAF2  | 0.4711 |
| ENSP00000283254 | SCN3A   | 0.4711 |
| ENSP00000287482 | SASS6   | 0.4711 |
| ENSP00000223129 | RPA3    | 0.4711 |
| ENSP00000391432 | RNPC3   | 0.4711 |
| ENSP00000357297 | RNF146  | 0.4711 |
| ENSP00000253571 | RLIM    | 0.4711 |
| ENSP00000016946 | RGPD5   | 0.4711 |
| ENSP00000438346 | REEP1   | 0.4711 |
| ENSP00000267502 | RDH12   | 0.4711 |
| ENSP00000306817 | RBKS    | 0.4711 |
| ENSP00000291294 | PTGIR   | 0.4711 |
| ENSP00000335579 | PPP4R1L | 0.4711 |
| ENSP00000387176 | POTEJ   | 0.4711 |
| ENSP00000352288 | PLXNB2  | 0.4711 |
| ENSP00000348772 | PITPNM1 | 0.4711 |
| ENSP00000269554 | PIP4K2B | 0.4711 |
| ENSP00000318966 | PINX1   | 0.4711 |
| ENSP00000357051 | PEX19   | 0.4711 |
| ENSP00000439467 | PDCD2   | 0.4711 |
| ENSP00000354724 | PCGF3   | 0.4711 |
| ENSP00000304767 | P2RY1   | 0.4711 |
| ENSP00000415904 | OAZ3    | 0.4711 |
| ENSP00000361544 | NUP62CL | 0.4711 |
| ENSP00000341083 | NPR2    | 0.4711 |
| ENSP00000268605 | NOL3    | 0.4711 |
| ENSP00000339495 | NELFB   | 0.4711 |
| ENSP00000221166 | NEFM    | 0.4711 |
| ENSP00000002125 | NDUFAF7 | 0.4711 |
| ENSP00000367346 | NDUFAF5 | 0.4711 |
| ENSP00000264363 | NDST4   | 0.4711 |
| ENSP00000362181 | NCR2    | 0.4711 |
| ENSP00000257829 | NAT10   | 0.4711 |
| ENSP00000255416 | MYBPH   | 0.4711 |
| ENSP00000361170 | MUTYH   | 0.4711 |
| ENSP00000367637 | MRS2    | 0.4711 |
| ENSP00000253686 | MRPS25  | 0.4711 |
| ENSP00000354086 | MRPL37  | 0.4711 |
| ENSP00000296102 | MRPL33  | 0.4711 |
| ENSP00000288937 | MRPL17  | 0.4711 |
| ENSP00000269202 | MEP1B   | 0.4711 |
| ENSP00000292035 | MED27   | 0.4711 |
| ENSP00000326767 | MED25   | 0.4711 |
| ENSP00000358719 | ME1     | 0.4711 |
| ENSP00000343164 | MATN4   | 0.4711 |
| ENSP00000319341 | LSM10   | 0.4711 |
| ENSP00000327875 | LPAR5   | 0.4711 |
| ENSP00000383900 | LIPK    | 0.4711 |

|                 |         |        |
|-----------------|---------|--------|
| ENSP00000349477 | KLRG1   | 0.4711 |
| ENSP00000312397 | KLHL3   | 0.4711 |
| ENSP00000331682 | KLHL22  | 0.4711 |
| ENSP00000374566 | KIF19   | 0.4711 |
| ENSP00000394390 | KCTD15  | 0.4711 |
| ENSP00000271751 | KCNH1   | 0.4711 |
| ENSP00000328511 | KCNA4   | 0.4711 |
| ENSP00000322730 | ITM2C   | 0.4711 |
| ENSP00000273541 | ISY1    | 0.4711 |
| ENSP00000322142 | ING5    | 0.4711 |
| ENSP00000296980 | IL22RA2 | 0.4711 |
| ENSP00000382707 | IFITM3  | 0.4711 |
| ENSP00000360876 | IFIT3   | 0.4711 |
| ENSP00000298902 | IFI27   | 0.4711 |
| ENSP00000255631 | HSPBP1  | 0.4711 |
| ENSP00000431063 | HSFX2   | 0.4711 |
| ENSP00000254521 | HSD17B7 | 0.4711 |
| ENSP00000289004 | HPD     | 0.4711 |
| ENSP00000310749 | HPCAL1  | 0.4711 |
| ENSP00000225893 | HNF1B   | 0.4711 |
| ENSP00000436714 | HCAR3   | 0.4711 |
| ENSP00000274306 | GZMA    | 0.4711 |
| ENSP00000230036 | GPLD1   | 0.4711 |
| ENSP00000383431 | GAB4    | 0.4711 |
| ENSP00000246166 | FNTB    | 0.4711 |
| ENSP00000297267 | FNDC1   | 0.4711 |
| ENSP00000364298 | FKBPL   | 0.4711 |
| ENSP00000310841 | FBXO31  | 0.4711 |
| ENSP00000418748 | ESRP2   | 0.4711 |
| ENSP00000374212 | EP400   | 0.4711 |
| ENSP00000320346 | ELL3    | 0.4711 |
| ENSP00000262103 | EFCAB1  | 0.4711 |
| ENSP00000296161 | DTX3L   | 0.4711 |
| ENSP00000244364 | DST     | 0.4711 |
| ENSP00000359127 | DPH5    | 0.4711 |
| ENSP00000329890 | DEFA5   | 0.4711 |
| ENSP00000332340 | DDX28   | 0.4711 |
| ENSP00000221114 | DCTN6   | 0.4711 |
| ENSP00000311095 | CYP4A11 | 0.4711 |
| ENSP00000293778 | CXCL16  | 0.4711 |
| ENSP00000384109 | CUL4B   | 0.4711 |
| ENSP00000320434 | CTNNAL1 | 0.4711 |
| ENSP00000254759 | COQ3    | 0.4711 |
| ENSP00000399013 | CNTNAP5 | 0.4711 |
| ENSP00000325548 | CNDP2   | 0.4711 |
| ENSP00000217402 | CHMP4B  | 0.4711 |
| ENSP00000353720 | CES1    | 0.4711 |
| ENSP00000435926 | CELF1   | 0.4711 |
| ENSP00000442068 | CDCA3   | 0.4711 |
| ENSP00000258091 | CCT7    | 0.4711 |
| ENSP00000308750 | CBX2    | 0.4711 |
| ENSP00000246533 | CAPNS1  | 0.4711 |
| ENSP00000222969 | BUD31   | 0.4711 |

|                 |            |        |
|-----------------|------------|--------|
| ENSP00000330753 | BRWD1      | 0.4711 |
| ENSP00000263080 | ASPA       | 0.4711 |
| ENSP00000366522 | ARHGAP39   | 0.4711 |
| ENSP00000293599 | AQP5       | 0.4711 |
| ENSP00000453144 | APBA2      | 0.4711 |
| ENSP00000216366 | AP4S1      | 0.4711 |
| ENSP00000299626 | ALG8       | 0.4711 |
| ENSP00000363988 | ALDOB      | 0.4711 |
| ENSP00000264409 | AGPAT9     | 0.4711 |
| ENSP00000333666 | ADI1       | 0.4711 |
| ENSP00000356975 | ADAMTS4    | 0.4711 |
| ENSP00000253382 | ACSS2      | 0.4711 |
| ENSP00000327916 | ACSM5      | 0.4711 |
| ENSP00000230048 | ACOT13     | 0.4711 |
| ENSP00000301452 | ACER1      | 0.4711 |
| ENSP00000324287 | ACAP2      | 0.4711 |
| ENSP00000439425 | AC025287.1 | 0.4711 |
| ENSP00000393511 | ABLIM2     | 0.4711 |
| ENSP00000382342 | ABCC1      | 0.4711 |
| ENSP00000319829 | ZNF687     | 0.4684 |
| ENSP00000411409 | ZNF598     | 0.4684 |
| ENSP00000377080 | ZFP1       | 0.4684 |
| ENSP00000369810 | VPS16      | 0.4684 |
| ENSP00000356905 | VNN1       | 0.4684 |
| ENSP00000339122 | VIPAS39    | 0.4684 |
| ENSP00000286428 | VBP1       | 0.4684 |
| ENSP00000261776 | VAC14      | 0.4684 |
| ENSP00000261637 | UTP20      | 0.4684 |
| ENSP00000254181 | USP29      | 0.4684 |
| ENSP00000285679 | USP25      | 0.4684 |
| ENSP00000356853 | UCK2       | 0.4684 |
| ENSP00000358674 | UBL4A      | 0.4684 |
| ENSP00000363634 | TXNDC8     | 0.4684 |
| ENSP00000222567 | TWISTNB    | 0.4684 |
| ENSP00000262605 | TTPAL      | 0.4684 |
| ENSP00000377043 | TLL6       | 0.4684 |
| ENSP00000382659 | TRPV1      | 0.4684 |
| ENSP00000368966 | TRPC3      | 0.4684 |
| ENSP00000261249 | TRMT5      | 0.4684 |
| ENSP00000369373 | TRIM5      | 0.4684 |
| ENSP00000295033 | TRIM17     | 0.4684 |
| ENSP00000239462 | TNN        | 0.4684 |
| ENSP00000243347 | TNFAIP6    | 0.4684 |
| ENSP00000291532 | TMPRSS3    | 0.4684 |
| ENSP00000414786 | TMEM64     | 0.4684 |
| ENSP00000378588 | TIMM9      | 0.4684 |
| ENSP00000266304 | TEF        | 0.4684 |
| ENSP00000310701 | TEAD2      | 0.4684 |
| ENSP00000440190 | TDRD3      | 0.4684 |
| ENSP00000381781 | TBC1D3B    | 0.4684 |
| ENSP00000300504 | TBC1D21    | 0.4684 |
| ENSP00000266987 | TARBP2     | 0.4684 |
| ENSP00000299424 | TAF10      | 0.4684 |

|                 |                |        |
|-----------------|----------------|--------|
| ENSP00000340594 | SYDE2          | 0.4684 |
| ENSP00000332565 | SULT4A1        | 0.4684 |
| ENSP00000260128 | SULF1          | 0.4684 |
| ENSP00000305255 | STX8           | 0.4684 |
| ENSP00000366156 | SRM            | 0.4684 |
| ENSP00000334538 | SREK1          | 0.4684 |
| ENSP00000345405 | SPRED3         | 0.4684 |
| ENSP00000264938 | SLC9A3         | 0.4684 |
| ENSP00000264047 | SLC5A7         | 0.4684 |
| ENSP00000304783 | SLC26A5        | 0.4684 |
| ENSP00000263753 | SGOL1          | 0.4684 |
| ENSP00000367893 | SEPHS1         | 0.4684 |
| ENSP00000263071 | SCARF1         | 0.4684 |
| ENSP00000369270 | RREB1          | 0.4684 |
| ENSP00000346063 | RPL7L1         | 0.4684 |
| ENSP00000389465 | RPL17-C18orf32 | 0.4684 |
| ENSP00000420449 | RP11-1220K2.2  | 0.4684 |
| ENSP00000434797 | RNF170         | 0.4684 |
| ENSP00000243326 | RIF1           | 0.4684 |
| ENSP00000262406 | RGS9           | 0.4684 |
| ENSP00000356641 | RFWD2          | 0.4684 |
| ENSP00000362751 | RABGAP1        | 0.4684 |
| ENSP00000216200 | PVALB          | 0.4684 |
| ENSP00000331418 | PTPRM          | 0.4684 |
| ENSP00000365528 | PTPRH          | 0.4684 |
| ENSP00000020673 | PSD            | 0.4684 |
| ENSP00000343629 | PRRC2C         | 0.4684 |
| ENSP00000343103 | PRMT7          | 0.4684 |
| ENSP00000335185 | PRICKLE4       | 0.4684 |
| ENSP00000337641 | PPP2R5E        | 0.4684 |
| ENSP00000299824 | PPP1R16B       | 0.4684 |
| ENSP00000304353 | POP7           | 0.4684 |
| ENSP00000262483 | PITPNM3        | 0.4684 |
| ENSP00000347032 | PIP4K2C        | 0.4684 |
| ENSP00000078527 | PIGV           | 0.4684 |
| ENSP00000350263 | PIGN           | 0.4684 |
| ENSP00000412189 | PGAM4          | 0.4684 |
| ENSP00000248633 | PEX1           | 0.4684 |
| ENSP00000322341 | PCBP4          | 0.4684 |
| ENSP00000422375 | NUDT16         | 0.4684 |
| ENSP00000356587 | NPHS2          | 0.4684 |
| ENSP00000438875 | NOVA1          | 0.4684 |
| ENSP00000365775 | MTHFR          | 0.4684 |
| ENSP00000341082 | MRPL20         | 0.4684 |
| ENSP00000219271 | MMP15          | 0.4684 |
| ENSP00000325562 | MINOS1         | 0.4684 |
| ENSP00000349490 | MFNG           | 0.4684 |
| ENSP00000364685 | MFAP2          | 0.4684 |
| ENSP00000230588 | MEP1A          | 0.4684 |
| ENSP00000295065 | MEMO1          | 0.4684 |
| ENSP00000362948 | MED18          | 0.4684 |
| ENSP00000249910 | MBD4           | 0.4684 |
| ENSP00000331983 | LRRC16A        | 0.4684 |

|                 |           |        |
|-----------------|-----------|--------|
| ENSP00000299022 | LIPC      | 0.4684 |
| ENSP00000357835 | LHPP      | 0.4684 |
| ENSP00000334052 | LGMN      | 0.4684 |
| ENSP00000363458 | LDLRAP1   | 0.4684 |
| ENSP00000354360 | LAMC3     | 0.4684 |
| ENSP00000205386 | LAMB4     | 0.4684 |
| ENSP00000357973 | LACE1     | 0.4684 |
| ENSP00000298307 | KLHDC2    | 0.4684 |
| ENSP00000384164 | KIF16B    | 0.4684 |
| ENSP00000260731 | KIF11     | 0.4684 |
| ENSP00000415769 | ITIH3     | 0.4684 |
| ENSP00000074304 | INPP4A    | 0.4684 |
| ENSP00000313243 | HSF5      | 0.4684 |
| ENSP00000350275 | HIST1H3A  | 0.4684 |
| ENSP00000289316 | HIST1H2BD | 0.4684 |
| ENSP00000313699 | HEPHL1    | 0.4684 |
| ENSP00000369654 | HBD       | 0.4684 |
| ENSP00000364580 | GRTP1     | 0.4684 |
| ENSP00000344659 | GLB1L2    | 0.4684 |
| ENSP00000467494 | GIPR      | 0.4684 |
| ENSP00000362344 | FPGS      | 0.4684 |
| ENSP00000291744 | FCN2      | 0.4684 |
| ENSP00000320828 | EPS8L2    | 0.4684 |
| ENSP00000345259 | EPB41     | 0.4684 |
| ENSP00000414851 | ELP2      | 0.4684 |
| ENSP00000402634 | ELOVL7    | 0.4684 |
| ENSP00000269466 | ELAC1     | 0.4684 |
| ENSP00000362314 | EIF4EBP2  | 0.4684 |
| ENSP00000369038 | EEF1E1    | 0.4684 |
| ENSP00000376855 | DPP10     | 0.4684 |
| ENSP00000361625 | DOLPP1    | 0.4684 |
| ENSP00000276440 | DOCK5     | 0.4684 |
| ENSP00000374490 | DNAH17    | 0.4684 |
| ENSP00000428480 | DLX6      | 0.4684 |
| ENSP00000300087 | DCTN5     | 0.4684 |
| ENSP00000301645 | CYP7A1    | 0.4684 |
| ENSP00000324648 | CYP2B6    | 0.4684 |
| ENSP00000258415 | CYP27A1   | 0.4684 |
| ENSP00000407724 | CSDE1     | 0.4684 |
| ENSP00000302485 | CSDC2     | 0.4684 |
| ENSP00000360541 | CPT2      | 0.4684 |
| ENSP00000316948 | CLK4      | 0.4684 |
| ENSP00000223398 | CLIP2     | 0.4684 |
| ENSP00000324205 | CHMP4A    | 0.4684 |
| ENSP00000361151 | CEL       | 0.4684 |
| ENSP00000234170 | CEBPZ     | 0.4684 |
| ENSP00000383611 | CCNL2     | 0.4684 |
| ENSP00000311847 | CARHSP1   | 0.4684 |
| ENSP00000258418 | CAB39     | 0.4684 |
| ENSP00000331127 | BOLA2     | 0.4684 |
| ENSP00000322991 | BCAT2     | 0.4684 |
| ENSP00000369055 | B4GALT1   | 0.4684 |
| ENSP00000335203 | ATPIF1    | 0.4684 |

|                 |            |        |
|-----------------|------------|--------|
| ENSP00000358777 | ATP6AP1    | 0.4684 |
| ENSP00000385057 | APOBEC3G   | 0.4684 |
| ENSP00000310146 | AP000769.1 | 0.4684 |
| ENSP00000253799 | AOC2       | 0.4684 |
| ENSP00000314004 | ANAPC2     | 0.4684 |
| ENSP00000297785 | ALDH1A1    | 0.4684 |
| ENSP00000315615 | AKAP5      | 0.4684 |
| ENSP00000312370 | AIFM2      | 0.4684 |
| ENSP00000285518 | AGPAT5     | 0.4684 |
| ENSP00000380413 | AGAP3      | 0.4684 |
| ENSP00000306606 | ADH1B      | 0.4684 |
| ENSP00000264758 | ADD1       | 0.4684 |
| ENSP00000265846 | ADAP1      | 0.4684 |
| ENSP00000333037 | ACTRT3     | 0.4684 |
| ENSP00000354841 | ABHD14B    | 0.4684 |
| ENSP00000362174 | ZC3H12A    | 0.4684 |
| ENSP00000420227 | RPS4XP21   | 0.4684 |
| ENSP00000200135 | ZW10       | 0.4658 |
| ENSP00000352233 | ZNF705A    | 0.4658 |
| ENSP00000331462 | ZNF704     | 0.4658 |
| ENSP00000237937 | ZFAND5     | 0.4658 |
| ENSP00000341681 | ZDHHC7     | 0.4658 |
| ENSP00000365130 | ZCCHC6     | 0.4658 |
| ENSP00000253048 | ZC3H4      | 0.4658 |
| ENSP00000384222 | WWC2       | 0.4658 |
| ENSP00000267973 | WDR61      | 0.4658 |
| ENSP00000371532 | VLDLR      | 0.4658 |
| ENSP00000387019 | UXS1       | 0.4658 |
| ENSP00000312981 | USP39      | 0.4658 |
| ENSP00000301831 | ULK4       | 0.4658 |
| ENSP00000290650 | UBR1       | 0.4658 |
| ENSP00000386935 | UAP1L1     | 0.4658 |
| ENSP00000182527 | TRAM2      | 0.4658 |
| ENSP00000344724 | TOX2       | 0.4658 |
| ENSP00000281834 | TNFSF4     | 0.4658 |
| ENSP00000331288 | TMEM173    | 0.4658 |
| ENSP00000359305 | TMED5      | 0.4658 |
| ENSP00000339730 | THBS4      | 0.4658 |
| ENSP00000238682 | TGFB3      | 0.4658 |
| ENSP00000334785 | TESC       | 0.4658 |
| ENSP00000350937 | TES        | 0.4658 |
| ENSP00000365962 | TBC1D25    | 0.4658 |
| ENSP00000303522 | TACR1      | 0.4658 |
| ENSP00000316130 | SYNE4      | 0.4658 |
| ENSP00000384015 | SUN1       | 0.4658 |
| ENSP00000341938 | SUMF2      | 0.4658 |
| ENSP00000365530 | STXBP4     | 0.4658 |
| ENSP00000330138 | SSTR3      | 0.4658 |
| ENSP00000338191 | SNTB2      | 0.4658 |
| ENSP00000356687 | SLC9C2     | 0.4658 |
| ENSP00000280612 | SLC7A11    | 0.4658 |
| ENSP00000310208 | SLC5A6     | 0.4658 |
| ENSP00000273063 | SLC4A3     | 0.4658 |



|                 |          |        |
|-----------------|----------|--------|
| ENSP00000234800 | SLC35E2B | 0.4658 |
| ENSP00000381399 | SLC2A11  | 0.4658 |
| ENSP00000345873 | SLC26A3  | 0.4658 |
| ENSP00000275233 | SHPRH    | 0.4658 |
| ENSP00000361640 | SH3GLB2  | 0.4658 |
| ENSP00000362298 | SGPL1    | 0.4658 |
| ENSP00000397082 | SFTPA1   | 0.4658 |
| ENSP00000233468 | SF3B14   | 0.4658 |
| ENSP00000426234 | SEPHS2   | 0.4658 |
| ENSP00000370288 | SELO     | 0.4658 |
| ENSP00000019103 | SCTR     | 0.4658 |
| ENSP00000369899 | RRAGA    | 0.4658 |
| ENSP00000362532 | RPRD1B   | 0.4658 |
| ENSP00000463847 | RPL26    | 0.4658 |
| ENSP00000359368 | RPAP2    | 0.4658 |
| ENSP00000273480 | RNF7     | 0.4658 |
| ENSP00000325677 | RNF40    | 0.4658 |
| ENSP00000254260 | RHPN2    | 0.4658 |
| ENSP00000217999 | RHOXF1   | 0.4658 |
| ENSP00000343656 | RAPGEF5  | 0.4658 |
| ENSP00000254695 | RAP1GAP2 | 0.4658 |
| ENSP00000350094 | QRICH1   | 0.4658 |
| ENSP00000363667 | PTPN3    | 0.4658 |
| ENSP00000254630 | PTCD3    | 0.4658 |
| ENSP00000452746 | PSTPIP1  | 0.4658 |
| ENSP00000215071 | PSMD8    | 0.4658 |
| ENSP00000373937 | PRTG     | 0.4658 |
| ENSP00000367835 | PRPF18   | 0.4658 |
| ENSP00000331879 | PRMT3    | 0.4658 |
| ENSP00000303057 | PPIC     | 0.4658 |
| ENSP00000350052 | POTEF    | 0.4658 |
| ENSP00000299443 | POTED    | 0.4658 |
| ENSP00000334564 | POLR3C   | 0.4658 |
| ENSP00000358223 | PNLIP    | 0.4658 |
| ENSP00000332225 | PMCH     | 0.4658 |
| ENSP00000390111 | PLSCR5   | 0.4658 |
| ENSP00000382434 | PLA2G4E  | 0.4658 |
| ENSP00000415203 | PIGG     | 0.4658 |
| ENSP00000263038 | PHYH     | 0.4658 |
| ENSP00000297373 | PHKG1    | 0.4658 |
| ENSP00000324248 | PENK     | 0.4658 |
| ENSP00000342033 | PDC      | 0.4658 |
| ENSP00000364597 | PADI4    | 0.4658 |
| ENSP00000320376 | P2RY13   | 0.4658 |
| ENSP00000280701 | OXSM     | 0.4658 |
| ENSP00000349874 | NUDT13   | 0.4658 |
| ENSP00000287437 | NSMCE2   | 0.4658 |
| ENSP00000278612 | NPAT     | 0.4658 |
| ENSP00000354387 | NMRK1    | 0.4658 |
| ENSP00000342300 | NELFCD   | 0.4658 |
| ENSP00000392709 | NDUFS1   | 0.4658 |
| ENSP00000184266 | NDUFB4   | 0.4658 |
| ENSP00000296499 | NDST3    | 0.4658 |

|                 |           |        |
|-----------------|-----------|--------|
| ENSP00000310657 | NDST2     | 0.4658 |
| ENSP00000361454 | NCBP2L    | 0.4658 |
| ENSP00000302441 | NANP      | 0.4658 |
| ENSP00000452521 | NAA30     | 0.4658 |
| ENSP00000354849 | MYBPC1    | 0.4658 |
| ENSP00000310785 | MRPS22    | 0.4658 |
| ENSP00000312395 | MRPS21    | 0.4658 |
| ENSP00000275053 | MMS22L    | 0.4658 |
| ENSP00000313881 | MKRN3     | 0.4658 |
| ENSP00000321070 | ME2       | 0.4658 |
| ENSP00000256178 | LYVE1     | 0.4658 |
| ENSP00000312001 | LRRN3     | 0.4658 |
| ENSP00000344364 | LRRC29    | 0.4658 |
| ENSP00000222307 | KXD1      | 0.4658 |
| ENSP00000330101 | KRT76     | 0.4658 |
| ENSP00000328236 | KNTC1     | 0.4658 |
| ENSP00000249776 | KNSTRN    | 0.4658 |
| ENSP00000338130 | KLRD1     | 0.4658 |
| ENSP00000326159 | KLK4      | 0.4658 |
| ENSP00000385545 | KIF26B    | 0.4658 |
| ENSP00000378356 | KIF20A    | 0.4658 |
| ENSP00000339960 | KCNJ5     | 0.4658 |
| ENSP00000245787 | INSIG2    | 0.4658 |
| ENSP00000263383 | ILVBL     | 0.4658 |
| ENSP00000330959 | IL1R2     | 0.4658 |
| ENSP00000302476 | HSPB2     | 0.4658 |
| ENSP00000335060 | HPDL      | 0.4658 |
| ENSP00000361935 | HPCAL4    | 0.4658 |
| ENSP00000342886 | HIST1H2BJ | 0.4658 |
| ENSP00000244573 | HIST1H1A  | 0.4658 |
| ENSP00000274787 | HIGD2A    | 0.4658 |
| ENSP00000290765 | GSTT2B    | 0.4658 |
| ENSP00000343428 | GPR18     | 0.4658 |
| ENSP00000363250 | GPN2      | 0.4658 |
| ENSP00000347206 | GPAA1     | 0.4658 |
| ENSP00000300873 | GNG8      | 0.4658 |
| ENSP00000229264 | GNB3      | 0.4658 |
| ENSP00000317379 | GLS       | 0.4658 |
| ENSP00000411593 | GLRA1     | 0.4658 |
| ENSP00000362460 | GJB3      | 0.4658 |
| ENSP00000336914 | FGD3      | 0.4658 |
| ENSP00000441093 | FDX1L     | 0.4658 |
| ENSP00000294800 | FCGR3B    | 0.4658 |
| ENSP00000344866 | FBXL5     | 0.4658 |
| ENSP00000224862 | FBXL15    | 0.4658 |
| ENSP00000188790 | FAP       | 0.4658 |
| ENSP00000402825 | FAM197Y1  | 0.4658 |
| ENSP00000360843 | FAF1      | 0.4658 |
| ENSP00000287675 | EXOGL     | 0.4658 |
| ENSP00000436337 | EPPK1     | 0.4658 |
| ENSP00000317431 | ENTHD1    | 0.4658 |
| ENSP00000230565 | ENPP5     | 0.4658 |
| ENSP00000265162 | ENPEP     | 0.4658 |

|                 |               |        |
|-----------------|---------------|--------|
| ENSP00000358831 | ELOVL4        | 0.4658 |
| ENSP00000470059 | ECH1          | 0.4658 |
| ENSP00000356056 | DYNLT1        | 0.4658 |
| ENSP00000367001 | DPP6          | 0.4658 |
| ENSP00000357384 | DPM3          | 0.4658 |
| ENSP00000263697 | DNAJC8        | 0.4658 |
| ENSP00000316053 | DNAJB8        | 0.4658 |
| ENSP00000251642 | DHX58         | 0.4658 |
| ENSP00000350698 | DDX47         | 0.4658 |
| ENSP00000454699 | DDX19B        | 0.4658 |
| ENSP00000216862 | CYP24A1       | 0.4658 |
| ENSP00000458537 | CTRL          | 0.4658 |
| ENSP00000470389 | CTD-2287O16.3 | 0.4658 |
| ENSP00000243914 | CTCFL         | 0.4658 |
| ENSP00000346805 | CRYBA4        | 0.4658 |
| ENSP00000358460 | CLIC2         | 0.4658 |
| ENSP00000355922 | CENPF         | 0.4658 |
| ENSP00000280614 | CCRN4L        | 0.4658 |
| ENSP00000302227 | CCBL1         | 0.4658 |
| ENSP00000290354 | CBR3          | 0.4658 |
| ENSP00000395359 | CADM1         | 0.4658 |
| ENSP00000349320 | CACNA2D1      | 0.4658 |
| ENSP00000352011 | CACNA1G       | 0.4658 |
| ENSP00000419765 | BRD9          | 0.4658 |
| ENSP00000403524 | BRAP          | 0.4658 |
| ENSP00000308334 | ATP5S         | 0.4658 |
| ENSP00000332756 | ATP11C        | 0.4658 |
| ENSP00000257254 | APLNR         | 0.4658 |
| ENSP00000359096 | AMY1C         | 0.4658 |
| ENSP00000315417 | ALX1          | 0.4658 |
| ENSP00000290953 | AGRP          | 0.4658 |
| ENSP00000449241 | AGAP2         | 0.4658 |
| ENSP00000264436 | ADD2          | 0.4658 |
| ENSP00000342609 | ACER2         | 0.4658 |
| ENSP00000261377 | AC004381.6    | 0.4658 |
| ENSP00000295962 | ABHD6         | 0.4658 |
| ENSP00000218104 | ABCD1         | 0.4658 |
| ENSP00000290575 | C1R           | 0.4658 |
| ENSP00000306381 | SMGA          | 0.4658 |
| ENSP00000361845 | ZMPSTE24      | 0.4632 |
| ENSP00000324274 | ZCCHC10       | 0.4632 |
| ENSP00000367299 | VPS36         | 0.4632 |
| ENSP00000357040 | VANGL2        | 0.4632 |
| ENSP00000296792 | UTP15         | 0.4632 |
| ENSP00000300896 | USP32         | 0.4632 |
| ENSP00000192788 | UHRF1BP1      | 0.4632 |
| ENSP00000334044 | UBL4B         | 0.4632 |
| ENSP00000355599 | TSNAX         | 0.4632 |
| ENSP00000397435 | TSC22D1       | 0.4632 |
| ENSP00000390478 | TREX1         | 0.4632 |
| ENSP00000353165 | TPK1          | 0.4632 |
| ENSP00000229270 | TPI1          | 0.4632 |
| ENSP00000206765 | TGM1          | 0.4632 |

|                 |          |        |
|-----------------|----------|--------|
| ENSP00000391806 | TAP2     | 0.4632 |
| ENSP00000352678 | SUPV3L1  | 0.4632 |
| ENSP00000319323 | STOML1   | 0.4632 |
| ENSP00000342181 | SRP72    | 0.4632 |
| ENSP00000312066 | SRP68    | 0.4632 |
| ENSP00000359484 | SMAP1    | 0.4632 |
| ENSP00000344648 | SLC37A1  | 0.4632 |
| ENSP00000313318 | SLC35C1  | 0.4632 |
| ENSP00000262462 | SLC27A6  | 0.4632 |
| ENSP00000360076 | SGIP1    | 0.4632 |
| ENSP00000264893 | SEPT11   | 0.4632 |
| ENSP00000332407 | SDR42E1  | 0.4632 |
| ENSP00000286835 | SCAF4    | 0.4632 |
| ENSP00000354045 | RRBP1    | 0.4632 |
| ENSP00000358497 | RNGTT    | 0.4632 |
| ENSP00000322242 | RNF10    | 0.4632 |
| ENSP00000397181 | RGS4     | 0.4632 |
| ENSP00000262633 | RBM42    | 0.4632 |
| ENSP00000450687 | RAX2     | 0.4632 |
| ENSP00000264926 | RAD18    | 0.4632 |
| ENSP00000348722 | PUS7     | 0.4632 |
| ENSP00000376758 | PTRH2    | 0.4632 |
| ENSP00000225426 | PSMB3    | 0.4632 |
| ENSP00000276616 | PSKH2    | 0.4632 |
| ENSP00000369634 | PRPF40B  | 0.4632 |
| ENSP00000348010 | PRPF39   | 0.4632 |
| ENSP00000412324 | PPP2R5C  | 0.4632 |
| ENSP00000264977 | PPP2R3A  | 0.4632 |
| ENSP00000295908 | PPM1K    | 0.4632 |
| ENSP00000361302 | POMT1    | 0.4632 |
| ENSP00000420176 | POLE4    | 0.4632 |
| ENSP00000296484 | POC1A    | 0.4632 |
| ENSP00000279036 | PIGT     | 0.4632 |
| ENSP00000378451 | PHF15    | 0.4632 |
| ENSP00000438465 | PGAM5    | 0.4632 |
| ENSP00000407401 | PEX5     | 0.4632 |
| ENSP00000358312 | PEX11B   | 0.4632 |
| ENSP00000326581 | PEG3     | 0.4632 |
| ENSP00000284770 | PDLIM3   | 0.4632 |
| ENSP00000223061 | PCOLCE   | 0.4632 |
| ENSP00000315693 | PAM16    | 0.4632 |
| ENSP00000359085 | NTNG1    | 0.4632 |
| ENSP00000340998 | NTN4     | 0.4632 |
| ENSP00000357669 | NPR1     | 0.4632 |
| ENSP00000319377 | NLRP12   | 0.4632 |
| ENSP00000258829 | NKX2-8   | 0.4632 |
| ENSP00000367301 | NDP      | 0.4632 |
| ENSP00000406861 | MUC6     | 0.4632 |
| ENSP00000355388 | MPHOSPH8 | 0.4632 |
| ENSP00000328694 | MOB2     | 0.4632 |
| ENSP00000456163 | MIR3654  | 0.4632 |
| ENSP00000378957 | MFAP4    | 0.4632 |
| ENSP00000385481 | METTL21A | 0.4632 |

|                 |          |        |
|-----------------|----------|--------|
| ENSP00000268711 | MED9     | 0.4632 |
| ENSP00000265350 | MED20    | 0.4632 |
| ENSP00000293777 | MED11    | 0.4632 |
| ENSP00000256429 | MBD2     | 0.4632 |
| ENSP00000219782 | MAZ      | 0.4632 |
| ENSP00000383690 | MASP2    | 0.4632 |
| ENSP00000252622 | LSM7     | 0.4632 |
| ENSP00000386357 | LRRTM4   | 0.4632 |
| ENSP00000326870 | LRRC48   | 0.4632 |
| ENSP00000363275 | LRRC18   | 0.4632 |
| ENSP00000381490 | LARP4    | 0.4632 |
| ENSP00000354878 | KIF21A   | 0.4632 |
| ENSP00000297404 | KCNV1    | 0.4632 |
| ENSP00000257981 | KCNH3    | 0.4632 |
| ENSP00000252321 | KCNA5    | 0.4632 |
| ENSP00000284262 | JPH3     | 0.4632 |
| ENSP00000314807 | IL1RAP   | 0.4632 |
| ENSP00000431254 | IGLL5    | 0.4632 |
| ENSP00000329991 | IFNL1    | 0.4632 |
| ENSP00000359444 | HSFX1    | 0.4632 |
| ENSP00000316786 | HSD11B2  | 0.4632 |
| ENSP00000296522 | HPGD     | 0.4632 |
| ENSP00000361927 | HNRNPH2  | 0.4632 |
| ENSP00000330074 | HIST1H1B | 0.4632 |
| ENSP00000246551 | HCST     | 0.4632 |
| ENSP00000381666 | GXYLT1   | 0.4632 |
| ENSP00000274400 | GTF2H2   | 0.4632 |
| ENSP00000347251 | GPS1     | 0.4632 |
| ENSP00000287020 | GDF6     | 0.4632 |
| ENSP00000318690 | GCFC2    | 0.4632 |
| ENSP00000377372 | GAP43    | 0.4632 |
| ENSP00000413152 | FKBP7    | 0.4632 |
| ENSP00000342858 | FERMT2   | 0.4632 |
| ENSP00000266087 | FBXO7    | 0.4632 |
| ENSP00000454380 | FAM173A  | 0.4632 |
| ENSP00000356771 | F5       | 0.4632 |
| ENSP00000366702 | ERRFI1   | 0.4632 |
| ENSP00000318066 | ENPP4    | 0.4632 |
| ENSP00000262726 | EFCAB6   | 0.4632 |
| ENSP00000366416 | EDNRB    | 0.4632 |
| ENSP00000430241 | EBF2     | 0.4632 |
| ENSP00000226004 | DUSP3    | 0.4632 |
| ENSP00000377910 | DUSP14   | 0.4632 |
| ENSP00000417548 | DNAJC24  | 0.4632 |
| ENSP00000190165 | DMRT3    | 0.4632 |
| ENSP00000378887 | DHRS7B   | 0.4632 |
| ENSP00000380495 | DDX51    | 0.4632 |
| ENSP00000356814 | DCAF6    | 0.4632 |
| ENSP00000323663 | DBF4B    | 0.4632 |
| ENSP00000413493 | CPSF3L   | 0.4632 |
| ENSP00000312587 | COQ10A   | 0.4632 |
| ENSP00000229251 | COPS7A   | 0.4632 |
| ENSP00000361834 | COL9A2   | 0.4632 |

|                 |                 |        |
|-----------------|-----------------|--------|
| ENSP00000229195 | CNOT2           | 0.4632 |
| ENSP00000252456 | CNN1            | 0.4632 |
| ENSP00000354609 | CNKS1R1         | 0.4632 |
| ENSP00000409378 | CHRM4           | 0.4632 |
| ENSP00000380998 | CHMP1A          | 0.4632 |
| ENSP00000295767 | CHCHD4          | 0.4632 |
| ENSP00000325485 | CERS5           | 0.4632 |
| ENSP00000268383 | CDR2            | 0.4632 |
| ENSP00000181839 | CDK13           | 0.4632 |
| ENSP00000304903 | CD2BP2          | 0.4632 |
| ENSP00000290349 | CBR1            | 0.4632 |
| ENSP00000258947 | CALCOCO2        | 0.4632 |
| ENSP00000396688 | C4A             | 0.4632 |
| ENSP00000466121 | C19orf40        | 0.4632 |
| ENSP00000380598 | BLOC1S5         | 0.4632 |
| ENSP00000398076 | ATP9B           | 0.4632 |
| ENSP00000356789 | ATP1B1          | 0.4632 |
| ENSP00000287394 | ATAD2           | 0.4632 |
| ENSP00000352995 | ARHGEF18        | 0.4632 |
| ENSP00000355026 | ARHGEF15        | 0.4632 |
| ENSP00000217456 | APMAP           | 0.4632 |
| ENSP00000265140 | ANKRD32         | 0.4632 |
| ENSP00000459775 | ANKFY1          | 0.4632 |
| ENSP00000330484 | AMY1B           | 0.4632 |
| ENSP00000262844 | AMMECR1         | 0.4632 |
| ENSP00000363512 | ALOX5           | 0.4632 |
| ENSP00000360761 | AGPAT2          | 0.4632 |
| ENSP00000328938 | AFMID           | 0.4632 |
| ENSP00000420487 | ABHD14A-ACY1    | 0.4632 |
| ENSP00000202788 | MAPKAPK5        | 0.4632 |
| ENSP00000415634 | ENSG00000248354 | 0.4632 |
| ENSP00000382987 | ZNF705B         | 0.4605 |
| ENSP00000311596 | ZNF699          | 0.4605 |
| ENSP00000386488 | ZC3H8           | 0.4605 |
| ENSP00000007699 | YBX2            | 0.4605 |
| ENSP00000334808 | USP16           | 0.4605 |
| ENSP00000293218 | UNK             | 0.4605 |
| ENSP00000406022 | UNC5C           | 0.4605 |
| ENSP00000464265 | UBBP4           | 0.4605 |
| ENSP00000356903 | UAP1            | 0.4605 |
| ENSP00000225576 | TVP23C          | 0.4605 |
| ENSP00000370007 | TMSB4X          | 0.4605 |
| ENSP00000404042 | TMED4           | 0.4605 |
| ENSP00000279263 | TM7SF2          | 0.4605 |
| ENSP00000254942 | TERF2           | 0.4605 |
| ENSP00000354633 | TAF11           | 0.4605 |
| ENSP00000356236 | SYT2            | 0.4605 |
| ENSP00000332818 | SV2B            | 0.4605 |
| ENSP00000319192 | STK17A          | 0.4605 |
| ENSP00000301463 | SPRYD3          | 0.4605 |
| ENSP00000332488 | SPPL2C          | 0.4605 |
| ENSP00000322568 | SOX11           | 0.4605 |
| ENSP00000222990 | SNX8            | 0.4605 |

|                 |               |        |
|-----------------|---------------|--------|
| ENSP00000229729 | SLC44A4       | 0.4605 |
| ENSP00000355920 | SLC22A2       | 0.4605 |
| ENSP00000321735 | SLC16A8       | 0.4605 |
| ENSP00000305976 | SIK2          | 0.4605 |
| ENSP00000373627 | SEPT14        | 0.4605 |
| ENSP00000305675 | SDPR          | 0.4605 |
| ENSP00000333537 | SALL2         | 0.4605 |
| ENSP00000357301 | RXFP4         | 0.4605 |
| ENSP00000274811 | RNF44         | 0.4605 |
| ENSP00000313350 | RNASEH1       | 0.4605 |
| ENSP00000232219 | RBP1          | 0.4605 |
| ENSP00000288976 | PTPDC1        | 0.4605 |
| ENSP00000275605 | PSPH          | 0.4605 |
| ENSP00000384848 | PRR5          | 0.4605 |
| ENSP00000359042 | PRPF38B       | 0.4605 |
| ENSP00000252455 | PRKCSH        | 0.4605 |
| ENSP00000228437 | PRDM4         | 0.4605 |
| ENSP00000278070 | PPRC1         | 0.4605 |
| ENSP00000238994 | PPP1R3C       | 0.4605 |
| ENSP00000393845 | PPIAL4G       | 0.4605 |
| ENSP00000242248 | POLM          | 0.4605 |
| ENSP00000299206 | POLL          | 0.4605 |
| ENSP00000265421 | POLB          | 0.4605 |
| ENSP00000330634 | PKD1P1        | 0.4605 |
| ENSP00000365757 | PIP4K2A       | 0.4605 |
| ENSP00000296029 | PF4           | 0.4605 |
| ENSP00000274311 | PELO          | 0.4605 |
| ENSP00000420927 | PDK2          | 0.4605 |
| ENSP00000370345 | PAN3          | 0.4605 |
| ENSP00000442349 | P2RX7         | 0.4605 |
| ENSP00000339389 | OTUD6A        | 0.4605 |
| ENSP00000265572 | OPRK1         | 0.4605 |
| ENSP00000361141 | OPN4          | 0.4605 |
| ENSP00000356708 | OLIG3         | 0.4605 |
| ENSP00000318029 | ODF3L2        | 0.4605 |
| ENSP00000331843 | NPIP          | 0.4605 |
| ENSP00000360412 | NOC3L         | 0.4605 |
| ENSP00000343479 | NBR1          | 0.4605 |
| ENSP00000442795 | MYBPC3        | 0.4605 |
| ENSP00000245185 | MT2A          | 0.4605 |
| ENSP00000431538 | MPZ           | 0.4605 |
| ENSP00000445920 | MMAB          | 0.4605 |
| ENSP00000314343 | MED29         | 0.4605 |
| ENSP00000359925 | LRRC1         | 0.4605 |
| ENSP00000262290 | LPO           | 0.4605 |
| ENSP00000357731 | LOR           | 0.4605 |
| ENSP00000261292 | LIPG          | 0.4605 |
| ENSP00000318423 | LINS          | 0.4605 |
| ENSP00000378400 | LIMA1         | 0.4605 |
| ENSP00000221421 | LHB           | 0.4605 |
| ENSP00000371886 | JMJD7-PLA2G4B | 0.4605 |
| ENSP00000260386 | ITPKA         | 0.4605 |
| ENSP00000259239 | IMP4          | 0.4605 |

|                 |            |        |
|-----------------|------------|--------|
| ENSP00000360891 | IFIT2      | 0.4605 |
| ENSP00000370293 | HUS1B      | 0.4605 |
| ENSP00000387564 | HMCN2      | 0.4605 |
| ENSP00000358155 | HIST2H2AA4 | 0.4605 |
| ENSP00000274764 | HIST1H2BA  | 0.4605 |
| ENSP00000366679 | HIST1H2AH  | 0.4605 |
| ENSP00000215780 | GSTT2      | 0.4605 |
| ENSP00000370104 | GPS2       | 0.4605 |
| ENSP00000303942 | GP9        | 0.4605 |
| ENSP00000258145 | GNS        | 0.4605 |
| ENSP00000355607 | GNPAT      | 0.4605 |
| ENSP00000310447 | GLS2       | 0.4605 |
| ENSP00000268797 | GFOD2      | 0.4605 |
| ENSP00000368589 | GFOD1      | 0.4605 |
| ENSP00000319531 | GCSH       | 0.4605 |
| ENSP00000265643 | GAL        | 0.4605 |
| ENSP00000292079 | FXVD2      | 0.4605 |
| ENSP00000309823 | FOXP4      | 0.4605 |
| ENSP00000256999 | FOLH1      | 0.4605 |
| ENSP00000254090 | FMO5       | 0.4605 |
| ENSP00000387471 | FAM96B     | 0.4605 |
| ENSP00000250056 | FAM64A     | 0.4605 |
| ENSP00000295834 | FABP1      | 0.4605 |
| ENSP00000356170 | ETNK2      | 0.4605 |
| ENSP00000347978 | ERCC5      | 0.4605 |
| ENSP00000351811 | EDC4       | 0.4605 |
| ENSP00000340742 | DOCK7      | 0.4605 |
| ENSP00000308312 | DNAI2      | 0.4605 |
| ENSP00000251312 | DHRS11     | 0.4605 |
| ENSP00000363071 | DES        | 0.4605 |
| ENSP00000362727 | DENND1A    | 0.4605 |
| ENSP00000003100 | CYP51A1    | 0.4605 |
| ENSP00000321821 | CYP4F12    | 0.4605 |
| ENSP00000376623 | CSH2       | 0.4605 |
| ENSP00000370966 | CRYZL1     | 0.4605 |
| ENSP00000325660 | CNTN1      | 0.4605 |
| ENSP00000317439 | CNPY1      | 0.4605 |
| ENSP00000286808 | CLDN17     | 0.4605 |
| ENSP00000310440 | CHMP2A     | 0.4605 |
| ENSP00000337289 | CENPQ      | 0.4605 |
| ENSP00000164024 | CELSR3     | 0.4605 |
| ENSP00000308815 | CCL19      | 0.4605 |
| ENSP00000325355 | CASKIN2    | 0.4605 |
| ENSP00000340329 | CAPRIN1    | 0.4605 |
| ENSP00000261669 | CAB39L     | 0.4605 |
| ENSP00000342032 | BPGM       | 0.4605 |
| ENSP00000267012 | BIN2       | 0.4605 |
| ENSP00000281474 | BICD1      | 0.4605 |
| ENSP00000309132 | BCL2L14    | 0.4605 |
| ENSP00000439128 | BANF2      | 0.4605 |
| ENSP00000359630 | BAI3       | 0.4605 |
| ENSP00000313171 | ATAD5      | 0.4605 |
| ENSP00000450040 | ASPG       | 0.4605 |



|                 |            |        |
|-----------------|------------|--------|
| ENSP00000264245 | ARHGAP31   | 0.4605 |
| ENSP00000261783 | ARG2       | 0.4605 |
| ENSP00000205948 | APOH       | 0.4605 |
| ENSP00000355929 | ANGEL2     | 0.4605 |
| ENSP00000351327 | AKAP4      | 0.4605 |
| ENSP00000265602 | AHI1       | 0.4605 |
| ENSP00000369921 | ADAMTSL1   | 0.4605 |
| ENSP00000416706 | ACTBL2     | 0.4605 |
| ENSP00000409267 | AC006156.1 | 0.4605 |
| ENSP00000359245 | ABCA4      | 0.4605 |
| ENSP00000313674 | AAR2       | 0.4605 |
| ENSP00000373698 | FBXW4      | 0.4605 |
| ENSP00000325018 | ZNF569     | 0.4579 |
| ENSP00000321209 | ZNF274     | 0.4579 |
| ENSP00000333253 | ZC3H11A    | 0.4579 |
| ENSP00000323678 | ZADH2      | 0.4579 |
| ENSP00000253031 | YIPF2      | 0.4579 |
| ENSP00000427687 | WDR1       | 0.4579 |
| ENSP00000356602 | VTA1       | 0.4579 |
| ENSP00000253794 | VPS25      | 0.4579 |
| ENSP00000348455 | UVRAG      | 0.4579 |
| ENSP00000350009 | USP33      | 0.4579 |
| ENSP00000304811 | UGT2B7     | 0.4579 |
| ENSP00000259253 | UGGT1      | 0.4579 |
| ENSP00000262209 | TRPA1      | 0.4579 |
| ENSP00000345719 | TOR1A      | 0.4579 |
| ENSP00000268957 | TOB1       | 0.4579 |
| ENSP00000266732 | TMPO       | 0.4579 |
| ENSP00000272521 | TMEM177    | 0.4579 |
| ENSP00000389399 | TMCO3      | 0.4579 |
| ENSP00000318115 | TIMM50     | 0.4579 |
| ENSP00000349781 | TBC1D8B    | 0.4579 |
| ENSP00000263974 | TAF12      | 0.4579 |
| ENSP00000246895 | STATH      | 0.4579 |
| ENSP00000364665 | SSX2B      | 0.4579 |
| ENSP00000287641 | SST        | 0.4579 |
| ENSP00000352936 | SPINK5     | 0.4579 |
| ENSP00000465075 | SPC24      | 0.4579 |
| ENSP00000370200 | SNAPC3     | 0.4579 |
| ENSP00000441269 | SLCO1B3    | 0.4579 |
| ENSP00000372390 | SLC7A4     | 0.4579 |
| ENSP00000429200 | SLC25A37   | 0.4579 |
| ENSP00000361666 | SLC22A7    | 0.4579 |
| ENSP00000357844 | SLC16A10   | 0.4579 |
| ENSP00000262461 | SLC12A2    | 0.4579 |
| ENSP00000216540 | SLC10A1    | 0.4579 |
| ENSP00000264382 | SI         | 0.4579 |
| ENSP00000299502 | SERPINB2   | 0.4579 |
| ENSP00000371936 | SEMA5A     | 0.4579 |
| ENSP00000341538 | SEC61G     | 0.4579 |
| ENSP00000245923 | RTN2       | 0.4579 |
| ENSP00000276659 | RSPO2      | 0.4579 |
| ENSP00000232888 | RRP9       | 0.4579 |

|                 |               |        |
|-----------------|---------------|--------|
| ENSP00000417464 | RRP1          | 0.4579 |
| ENSP00000347271 | RPS10         | 0.4579 |
| ENSP00000293842 | RPL26         | 0.4579 |
| ENSP00000431165 | RP11-192H23.4 | 0.4579 |
| ENSP00000342121 | RNF6          | 0.4579 |
| ENSP00000302324 | RNASE3        | 0.4579 |
| ENSP00000362863 | REEP3         | 0.4579 |
| ENSP00000339090 | RBMX2         | 0.4579 |
| ENSP00000362283 | PTPRT         | 0.4579 |
| ENSP00000357196 | PTPRK         | 0.4579 |
| ENSP00000225992 | PPY           | 0.4579 |
| ENSP00000312411 | PPM1E         | 0.4579 |
| ENSP00000439444 | PPIAL4D       | 0.4579 |
| ENSP00000334840 | PNRC2         | 0.4579 |
| ENSP00000323511 | PNKP          | 0.4579 |
| ENSP00000290472 | PLA2G4D       | 0.4579 |
| ENSP00000398824 | PHF21A        | 0.4579 |
| ENSP00000258662 | NUDT15        | 0.4579 |
| ENSP00000296802 | NSA2          | 0.4579 |
| ENSP00000361214 | NRG3          | 0.4579 |
| ENSP00000349041 | NRARP         | 0.4579 |
| ENSP00000264218 | NMU           | 0.4579 |
| ENSP00000252711 | NDUFA10       | 0.4579 |
| ENSP00000239926 | MYOT          | 0.4579 |
| ENSP00000417498 | MUC4          | 0.4579 |
| ENSP00000237380 | MED28         | 0.4579 |
| ENSP00000318604 | MAF1          | 0.4579 |
| ENSP00000235310 | MAD2L2        | 0.4579 |
| ENSP00000365040 | LY6G5B        | 0.4579 |
| ENSP00000302456 | KLF13         | 0.4579 |
| ENSP00000259711 | KIF13A        | 0.4579 |
| ENSP00000370710 | KDM4C         | 0.4579 |
| ENSP00000355580 | KCNK1         | 0.4579 |
| ENSP00000376432 | KCNJ1         | 0.4579 |
| ENSP00000463533 | KCNH6         | 0.4579 |
| ENSP00000346453 | IPO4          | 0.4579 |
| ENSP00000408526 | IMPA1         | 0.4579 |
| ENSP00000360869 | IFIT1         | 0.4579 |
| ENSP00000359393 | HMGB3         | 0.4579 |
| ENSP00000378786 | HLA-DRA       | 0.4579 |
| ENSP00000350580 | HIST1H2BB     | 0.4579 |
| ENSP00000420168 | GSTA2         | 0.4579 |
| ENSP00000378492 | GRM2          | 0.4579 |
| ENSP00000222803 | FKBP14        | 0.4579 |
| ENSP00000361669 | ESX1          | 0.4579 |
| ENSP00000353270 | ERGIC2        | 0.4579 |
| ENSP00000308472 | EIF4EBP3      | 0.4579 |
| ENSP00000394869 | EIF2B4        | 0.4579 |
| ENSP00000370614 | DPF3          | 0.4579 |
| ENSP00000266037 | DOCK3         | 0.4579 |
| ENSP00000365991 | DNAJC3        | 0.4579 |
| ENSP00000238146 | DDX55         | 0.4579 |
| ENSP00000297579 | DCAF13        | 0.4579 |

|                 |                 |        |
|-----------------|-----------------|--------|
| ENSP00000337065 | CXCL14          | 0.4579 |
| ENSP00000367064 | CUBN            | 0.4579 |
| ENSP00000312506 | CSPG4           | 0.4579 |
| ENSP00000397441 | COG6            | 0.4579 |
| ENSP00000355572 | COA6            | 0.4579 |
| ENSP00000315130 | CLU             | 0.4579 |
| ENSP00000354856 | CLK2            | 0.4579 |
| ENSP00000185206 | CLIC5           | 0.4579 |
| ENSP00000319984 | CHRM2           | 0.4579 |
| ENSP00000263780 | CHMP2B          | 0.4579 |
| ENSP00000340210 | CD59            | 0.4579 |
| ENSP00000292301 | CCR2            | 0.4579 |
| ENSP00000303525 | CBR4            | 0.4579 |
| ENSP00000298892 | CAPRIN2         | 0.4579 |
| ENSP00000419195 | CAMKV           | 0.4579 |
| ENSP00000331746 | CALCA           | 0.4579 |
| ENSP00000324960 | CABP4           | 0.4579 |
| ENSP00000294288 | CABP2           | 0.4579 |
| ENSP00000327440 | BMP8A           | 0.4579 |
| ENSP00000363162 | ATP6V1G1        | 0.4579 |
| ENSP00000355173 | ATG9A           | 0.4579 |
| ENSP00000370526 | ARSE            | 0.4579 |
| ENSP00000472409 | ARL14EPL        | 0.4579 |
| ENSP00000219660 | AQP8            | 0.4579 |
| ENSP00000318355 | AQP10           | 0.4579 |
| ENSP00000379133 | APIP            | 0.4579 |
| ENSP00000454303 | AP5B1           | 0.4579 |
| ENSP00000360170 | ANGPTL3         | 0.4579 |
| ENSP00000291572 | AGPAT3          | 0.4579 |
| ENSP00000348381 | ADD3            | 0.4579 |
| ENSP00000296513 | ADAD1           | 0.4579 |
| ENSP00000254286 | ACTR10          | 0.4579 |
| ENSP00000252519 | ACE2            | 0.4579 |
| ENSP00000399696 | AC037459.4      | 0.4579 |
| ENSP00000272286 | ABCG8           | 0.4579 |
| ENSP00000352498 | WASH6P          | 0.4579 |
| ENSP00000448888 | ENSG00000258210 | 0.4579 |
| ENSP00000378201 | ZBTB1           | 0.4553 |
| ENSP00000242796 | WDR83           | 0.4553 |
| ENSP00000320563 | WDFY4           | 0.4553 |
| ENSP00000272322 | VPS54           | 0.4553 |
| ENSP00000262291 | VMP1            | 0.4553 |
| ENSP00000227471 | UNC93B1         | 0.4553 |
| ENSP00000358478 | TTF2            | 0.4553 |
| ENSP00000357219 | TTC24           | 0.4553 |
| ENSP00000398163 | TSPY3           | 0.4553 |
| ENSP00000342222 | TRPV2           | 0.4553 |
| ENSP00000354204 | TOMM20L         | 0.4553 |
| ENSP00000356298 | TMEM9           | 0.4553 |
| ENSP00000423933 | THUMPD2         | 0.4553 |
| ENSP00000255224 | SYT4            | 0.4553 |
| ENSP00000293695 | SYCE2           | 0.4553 |
| ENSP00000343645 | SULT1A3         | 0.4553 |

|                 |         |        |
|-----------------|---------|--------|
| ENSP00000264228 | SRD5A3  | 0.4553 |
| ENSP00000282223 | SPOCK1  | 0.4553 |
| ENSP00000347314 | SPG20   | 0.4553 |
| ENSP00000219611 | SOLH    | 0.4553 |
| ENSP00000355261 | SMG5    | 0.4553 |
| ENSP00000354574 | SLC9B2  | 0.4553 |
| ENSP00000261867 | SLC30A4 | 0.4553 |
| ENSP00000378756 | SLC16A9 | 0.4553 |
| ENSP00000319991 | SLC16A6 | 0.4553 |
| ENSP00000338171 | SKAP1   | 0.4553 |
| ENSP00000361400 | SFTPA2  | 0.4553 |
| ENSP00000345751 | SCNN1B  | 0.4553 |
| ENSP00000381824 | SAC3D1  | 0.4553 |
| ENSP00000375853 | RGS13   | 0.4553 |
| ENSP00000370648 | RDH14   | 0.4553 |
| ENSP00000054950 | RCN1    | 0.4553 |
| ENSP00000341483 | RANBP3  | 0.4553 |
| ENSP00000311360 | RAD9A   | 0.4553 |
| ENSP00000216840 | RABGGTA | 0.4553 |
| ENSP00000350934 | RABEP2  | 0.4553 |
| ENSP00000302327 | PYGO1   | 0.4553 |
| ENSP00000348472 | PXK     | 0.4553 |
| ENSP00000387365 | PWP1    | 0.4553 |
| ENSP00000266688 | PTPRQ   | 0.4553 |
| ENSP00000301974 | PTAFR   | 0.4553 |
| ENSP00000295083 | PQLC3   | 0.4553 |
| ENSP00000377390 | PPP6R3  | 0.4553 |
| ENSP00000439146 | PPIAL4A | 0.4553 |
| ENSP00000329697 | PPAP2C  | 0.4553 |
| ENSP00000392718 | POTEI   | 0.4553 |
| ENSP00000439189 | POTEE   | 0.4553 |
| ENSP00000457689 | POTEB   | 0.4553 |
| ENSP00000402758 | PMEL    | 0.4553 |
| ENSP00000247665 | PHPT1   | 0.4553 |
| ENSP00000311453 | PDE8A   | 0.4553 |
| ENSP00000354950 | PCDH15  | 0.4553 |
| ENSP00000296220 | OSBPL11 | 0.4553 |
| ENSP00000264169 | ORC4    | 0.4553 |
| ENSP00000228928 | OAS3    | 0.4553 |
| ENSP00000368459 | NUFIP1  | 0.4553 |
| ENSP00000303575 | NUDT9   | 0.4553 |
| ENSP00000336528 | NR1I2   | 0.4553 |
| ENSP00000370883 | NOMO2   | 0.4553 |
| ENSP00000297990 | NOL6    | 0.4553 |
| ENSP00000351591 | NLGN3   | 0.4553 |
| ENSP00000396103 | MYT1L   | 0.4553 |
| ENSP00000348821 | MYOM1   | 0.4553 |
| ENSP00000349977 | MVP     | 0.4553 |
| ENSP00000258105 | MRPL53  | 0.4553 |
| ENSP00000354580 | MRPL21  | 0.4553 |
| ENSP00000302177 | MBOAT2  | 0.4553 |
| ENSP00000352835 | MB      | 0.4553 |
| ENSP00000403208 | MAP10   | 0.4553 |

|                 |             |        |
|-----------------|-------------|--------|
| ENSP00000228740 | LTA4H       | 0.4553 |
| ENSP00000321334 | LPA         | 0.4553 |
| ENSP00000462730 | LMNB2       | 0.4553 |
| ENSP00000402301 | LAPTM4B     | 0.4553 |
| ENSP00000377582 | KRTAP4-12   | 0.4553 |
| ENSP00000395323 | KCNIP1      | 0.4553 |
| ENSP00000328813 | KCNH8       | 0.4553 |
| ENSP00000262186 | KCNH2       | 0.4553 |
| ENSP00000348648 | JPH4        | 0.4553 |
| ENSP00000420419 | JAM2        | 0.4553 |
| ENSP00000354742 | IPO9        | 0.4553 |
| ENSP00000429065 | INTS9       | 0.4553 |
| ENSP00000380247 | HRH1        | 0.4553 |
| ENSP00000322706 | HMGCS1      | 0.4553 |
| ENSP00000355656 | HIST3H2A    | 0.4553 |
| ENSP00000344504 | HIF0        | 0.4553 |
| ENSP00000216044 | GTPBP1      | 0.4553 |
| ENSP00000345282 | GPT2        | 0.4553 |
| ENSP00000392828 | GPSM1       | 0.4553 |
| ENSP00000339057 | GPRASP2     | 0.4553 |
| ENSP00000229314 | GOLT1B      | 0.4553 |
| ENSP00000381340 | GGT5        | 0.4553 |
| ENSP00000359504 | GBP1        | 0.4553 |
| ENSP00000331358 | GAST        | 0.4553 |
| ENSP00000254466 | GAS2L2      | 0.4553 |
| ENSP00000242257 | FTSJ2       | 0.4553 |
| ENSP00000340191 | FPR2        | 0.4553 |
| ENSP00000288670 | FMNL2       | 0.4553 |
| ENSP00000317232 | FKBP10      | 0.4553 |
| ENSP00000411145 | FEZF1       | 0.4553 |
| ENSP00000365944 | FBXO6       | 0.4553 |
| ENSP00000364742 | FBXO42      | 0.4553 |
| ENSP00000229971 | FBXL4       | 0.4553 |
| ENSP00000337477 | FAM60A      | 0.4553 |
| ENSP00000367059 | ESPN        | 0.4553 |
| ENSP00000258484 | EPC2        | 0.4553 |
| ENSP00000311545 | EMR1        | 0.4553 |
| ENSP00000273130 | DYNC1LI1    | 0.4553 |
| ENSP00000329539 | DUSP8       | 0.4553 |
| ENSP00000255108 | DPH2        | 0.4553 |
| ENSP00000246949 | DNASE1      | 0.4553 |
| ENSP00000216068 | DNAL4       | 0.4553 |
| ENSP00000284061 | DGKE        | 0.4553 |
| ENSP00000265728 | DBF4        | 0.4553 |
| ENSP00000360247 | CYP2J2      | 0.4553 |
| ENSP00000228606 | CYP27B1     | 0.4553 |
| ENSP00000365116 | CTRC        | 0.4553 |
| ENSP00000454861 | CTC-554D6.1 | 0.4553 |
| ENSP00000339399 | CRYZ        | 0.4553 |
| ENSP00000299335 | COX11       | 0.4553 |
| ENSP00000272995 | COPS7B      | 0.4553 |
| ENSP00000381949 | COL13A1     | 0.4553 |
| ENSP00000305459 | COG8        | 0.4553 |

|                 |          |        |
|-----------------|----------|--------|
| ENSP00000328478 | CNGA2    | 0.4553 |
| ENSP00000405635 | CNEP1R1  | 0.4553 |
| ENSP00000305204 | CKAP2L   | 0.4553 |
| ENSP00000299847 | CHRFAM7A | 0.4553 |
| ENSP00000229266 | CHPT1    | 0.4553 |
| ENSP00000275517 | CDCA5    | 0.4553 |
| ENSP00000323280 | CD6      | 0.4553 |
| ENSP00000320084 | CD276    | 0.4553 |
| ENSP00000262962 | CCDC94   | 0.4553 |
| ENSP00000216133 | CBX7     | 0.4553 |
| ENSP00000355837 | CAPN8    | 0.4553 |
| ENSP00000278559 | CAPN5    | 0.4553 |
| ENSP00000381758 | CAPN11   | 0.4553 |
| ENSP00000226021 | CACNG1   | 0.4553 |
| ENSP00000223642 | C5       | 0.4553 |
| ENSP00000332979 | BACE2    | 0.4553 |
| ENSP00000352408 | BABAM1   | 0.4553 |
| ENSP00000029410 | B4GALT7  | 0.4553 |
| ENSP00000421076 | ATP5L2   | 0.4553 |
| ENSP00000246747 | ARL2     | 0.4553 |
| ENSP00000264487 | AREG     | 0.4553 |
| ENSP00000266594 | ANP32D   | 0.4553 |
| ENSP00000296785 | ANKRA2   | 0.4553 |
| ENSP00000417764 | ALG2     | 0.4553 |
| ENSP00000223357 | AEBP1    | 0.4553 |
| ENSP00000253003 | ADRM1    | 0.4553 |
| ENSP00000072869 | ADCK2    | 0.4553 |
| ENSP00000384296 | ACY1     | 0.4553 |
| ENSP00000311224 | ACOT1    | 0.4553 |
| ENSP00000434480 | ACER3    | 0.4553 |
| ENSP00000464149 | ACE      | 0.4553 |
| ENSP00000311436 | ABRA     | 0.4553 |
| ENSP00000261200 | ABCC9    | 0.4553 |
| ENSP00000282326 | ZSCAN1   | 0.4526 |
| ENSP00000408108 | WDR26    | 0.4526 |
| ENSP00000295156 | VSNL1    | 0.4526 |
| ENSP00000356213 | VIP      | 0.4526 |
| ENSP00000334329 | UNC5B    | 0.4526 |
| ENSP00000268876 | UNC45B   | 0.4526 |
| ENSP00000283628 | UBP1     | 0.4526 |
| ENSP00000387362 | UBE4A    | 0.4526 |
| ENSP00000397453 | UBE2W    | 0.4526 |
| ENSP00000314077 | TSPY2    | 0.4526 |
| ENSP00000369003 | TRPC4    | 0.4526 |
| ENSP00000350352 | TRMT1    | 0.4526 |
| ENSP00000328203 | TRAIP    | 0.4526 |
| ENSP00000351214 | TOMM7    | 0.4526 |
| ENSP00000328207 | TNFRSF18 | 0.4526 |
| ENSP00000230461 | TMEM30A  | 0.4526 |
| ENSP00000385995 | THADA    | 0.4526 |
| ENSP00000251864 | TDRD1    | 0.4526 |
| ENSP00000347719 | TBCD     | 0.4526 |
| ENSP00000345014 | TBC1D3G  | 0.4526 |

|                 |              |        |
|-----------------|--------------|--------|
| ENSP00000236273 | SYF2         | 0.4526 |
| ENSP00000443988 | SUDS3        | 0.4526 |
| ENSP00000248600 | STYXL1       | 0.4526 |
| ENSP00000265044 | SSR3         | 0.4526 |
| ENSP00000347721 | SPNS3        | 0.4526 |
| ENSP00000366452 | SNX15        | 0.4526 |
| ENSP00000361803 | SMAP2        | 0.4526 |
| ENSP00000251303 | SLX1A        | 0.4526 |
| ENSP00000394168 | SLCO1B7      | 0.4526 |
| ENSP00000265113 | SLC1A3       | 0.4526 |
| ENSP00000277010 | SIGMAR1      | 0.4526 |
| ENSP00000306473 | SHCBP1       | 0.4526 |
| ENSP00000362308 | SH3BGRL      | 0.4526 |
| ENSP00000347117 | SEMA4A       | 0.4526 |
| ENSP00000299333 | SCN3B        | 0.4526 |
| ENSP00000324729 | SAV1         | 0.4526 |
| ENSP00000374280 | RTF1         | 0.4526 |
| ENSP00000462023 | RPL17        | 0.4526 |
| ENSP00000306123 | RPAP1        | 0.4526 |
| ENSP00000468280 | RP11-178C3.1 | 0.4526 |
| ENSP00000283109 | RIOK2        | 0.4526 |
| ENSP00000301459 | RCOR2        | 0.4526 |
| ENSP00000222145 | RASIP1       | 0.4526 |
| ENSP00000291041 | PSKH1        | 0.4526 |
| ENSP00000234179 | PRKD3        | 0.4526 |
| ENSP00000315035 | PPP1R42      | 0.4526 |
| ENSP00000301242 | PPP1R14A     | 0.4526 |
| ENSP00000465213 | POP4         | 0.4526 |
| ENSP00000317128 | PLXND1       | 0.4526 |
| ENSP00000217971 | PGRMC1       | 0.4526 |
| ENSP00000303511 | PEX6         | 0.4526 |
| ENSP00000408598 | PABPN1L      | 0.4526 |
| ENSP00000298440 | OXGR1        | 0.4526 |
| ENSP00000385636 | OBSL1        | 0.4526 |
| ENSP00000225388 | NUFIP2       | 0.4526 |
| ENSP00000368314 | NRCAM        | 0.4526 |
| ENSP00000382274 | NOMO3        | 0.4526 |
| ENSP00000265500 | NDUFC1       | 0.4526 |
| ENSP00000247866 | NDUFB2       | 0.4526 |
| ENSP00000323076 | NDUFAF3      | 0.4526 |
| ENSP00000251127 | NALCN        | 0.4526 |
| ENSP00000223167 | MYL10        | 0.4526 |
| ENSP00000304147 | MYEOV2       | 0.4526 |
| ENSP00000350332 | MYBPC2       | 0.4526 |
| ENSP00000228510 | MVK          | 0.4526 |
| ENSP00000331849 | MRPL54       | 0.4526 |
| ENSP00000363999 | MRPL50       | 0.4526 |
| ENSP00000240488 | MND1         | 0.4526 |
| ENSP00000262065 | MMD          | 0.4526 |
| ENSP00000383894 | MATN3        | 0.4526 |
| ENSP00000359240 | LZTS2        | 0.4526 |
| ENSP00000284818 | LY96         | 0.4526 |
| ENSP00000357020 | LY9          | 0.4526 |

|                 |           |        |
|-----------------|-----------|--------|
| ENSP00000469468 | LSM4      | 0.4526 |
| ENSP00000295628 | LRRC58    | 0.4526 |
| ENSP00000326759 | LRIG3     | 0.4526 |
| ENSP00000359643 | LPAR3     | 0.4526 |
| ENSP00000216237 | L3MBTL2   | 0.4526 |
| ENSP00000351933 | KLHL9     | 0.4526 |
| ENSP00000343273 | KLHL7     | 0.4526 |
| ENSP00000356990 | KLHDC9    | 0.4526 |
| ENSP00000358784 | KCNA3     | 0.4526 |
| ENSP00000262419 | KANSL1    | 0.4526 |
| ENSP00000269593 | IGFBP4    | 0.4526 |
| ENSP00000316244 | HTR1A     | 0.4526 |
| ENSP00000199936 | HSD17B2   | 0.4526 |
| ENSP00000366506 | HRH2      | 0.4526 |
| ENSP00000380177 | HIST1H2BN | 0.4526 |
| ENSP00000352627 | HIST1H2AM | 0.4526 |
| ENSP00000352119 | HIST1H2AG | 0.4526 |
| ENSP00000259791 | HIST1H2AB | 0.4526 |
| ENSP00000297012 | HIST1H2AA | 0.4526 |
| ENSP00000359049 | HENMT1    | 0.4526 |
| ENSP00000293330 | HCRT      | 0.4526 |
| ENSP00000261170 | GUCY2C    | 0.4526 |
| ENSP00000378408 | GPT       | 0.4526 |
| ENSP00000237858 | GLRX      | 0.4526 |
| ENSP00000355675 | GJC2      | 0.4526 |
| ENSP00000333157 | GH2       | 0.4526 |
| ENSP00000458307 | GGT6      | 0.4526 |
| ENSP00000272224 | GDF7      | 0.4526 |
| ENSP00000224605 | GDF10     | 0.4526 |
| ENSP00000299267 | GABRB3    | 0.4526 |
| ENSP00000313691 | FTMT      | 0.4526 |
| ENSP00000371798 | FSCN1     | 0.4526 |
| ENSP00000350032 | FRMD4A    | 0.4526 |
| ENSP00000417257 | FNDC3A    | 0.4526 |
| ENSP00000318884 | FMN2      | 0.4526 |
| ENSP00000326570 | FKRP      | 0.4526 |
| ENSP00000310686 | FBXW8     | 0.4526 |
| ENSP00000385021 | FANCL     | 0.4526 |
| ENSP00000346635 | ERO1LB    | 0.4526 |
| ENSP00000348089 | ERCC6     | 0.4526 |
| ENSP00000199389 | EIF2AK1   | 0.4526 |
| ENSP00000357393 | EFNA3     | 0.4526 |
| ENSP00000228862 | DUSP16    | 0.4526 |
| ENSP00000225729 | DRG2      | 0.4526 |
| ENSP00000365838 | DPRX      | 0.4526 |
| ENSP00000262960 | DPP9      | 0.4526 |
| ENSP00000296218 | DNALI1    | 0.4526 |
| ENSP00000305785 | DMRT2     | 0.4526 |
| ENSP00000356366 | DENND1B   | 0.4526 |
| ENSP00000228476 | DAO       | 0.4526 |
| ENSP00000378360 | DAK       | 0.4526 |
| ENSP00000265968 | CSRP3     | 0.4526 |
| ENSP00000264193 | CPOX      | 0.4526 |



|                 |                |        |
|-----------------|----------------|--------|
| ENSP00000296046 | CPA3           | 0.4526 |
| ENSP00000373298 | COLQ           | 0.4526 |
| ENSP00000275162 | CLVS2          | 0.4526 |
| ENSP00000353732 | CLIP3          | 0.4526 |
| ENSP00000335632 | CHP1           | 0.4526 |
| ENSP00000344683 | CDK5RAP3       | 0.4526 |
| ENSP00000316121 | CDCA8          | 0.4526 |
| ENSP00000259631 | CCL27          | 0.4526 |
| ENSP00000379157 | CAST           | 0.4526 |
| ENSP00000304364 | C1GALT1C1      | 0.4526 |
| ENSP00000396052 | BRMS1          | 0.4526 |
| ENSP00000359474 | BARHL2         | 0.4526 |
| ENSP00000286800 | BACH1          | 0.4526 |
| ENSP00000367697 | ATP6AP2        | 0.4526 |
| ENSP00000286371 | ATP1B3         | 0.4526 |
| ENSP00000250111 | ATP1B2         | 0.4526 |
| ENSP00000384259 | ATG4B          | 0.4526 |
| ENSP00000370639 | ASMT           | 0.4526 |
| ENSP00000397582 | AMY2A          | 0.4526 |
| ENSP00000293761 | ALOX15         | 0.4526 |
| ENSP00000355377 | AKR7A3         | 0.4526 |
| ENSP00000263126 | AKR1C4         | 0.4526 |
| ENSP00000467958 | AC006538.4     | 0.4526 |
| ENSP00000311030 | ABCC12         | 0.4526 |
| ENSP00000375133 | ZRSR1          | 0.4500 |
| ENSP00000383020 | ZNF705G        | 0.4500 |
| ENSP00000313258 | ZNF541         | 0.4500 |
| ENSP00000349494 | ZNF254         | 0.4500 |
| ENSP00000353863 | ZNF148         | 0.4500 |
| ENSP00000349708 | ZMYM6          | 0.4500 |
| ENSP00000339030 | ZFP91          | 0.4500 |
| ENSP00000262394 | WSB1           | 0.4500 |
| ENSP00000324203 | WRAP53         | 0.4500 |
| ENSP00000297954 | WNK2           | 0.4500 |
| ENSP00000385361 | VPREB1         | 0.4500 |
| ENSP00000309262 | USP48          | 0.4500 |
| ENSP00000304845 | UGT1A1         | 0.4500 |
| ENSP00000362711 | TXLNA          | 0.4500 |
| ENSP00000451131 | TTC6           | 0.4500 |
| ENSP00000327984 | TSPY8          | 0.4500 |
| ENSP00000309402 | TRAM1L1        | 0.4500 |
| ENSP00000329093 | TPH2           | 0.4500 |
| ENSP00000347930 | TMEM30B        | 0.4500 |
| ENSP00000344166 | TMEM189-UBE2V1 | 0.4500 |
| ENSP00000267415 | TINF2          | 0.4500 |
| ENSP00000363211 | TIMM23B        | 0.4500 |
| ENSP00000295400 | TGFA           | 0.4500 |
| ENSP00000223051 | TFR2           | 0.4500 |
| ENSP00000249284 | TAS2R16        | 0.4500 |
| ENSP00000371932 | TAS2R1         | 0.4500 |
| ENSP00000312709 | TAF7           | 0.4500 |
| ENSP00000399982 | TAF6           | 0.4500 |
| ENSP00000272902 | SUMF1          | 0.4500 |

|                 |          |        |
|-----------------|----------|--------|
| ENSP00000366746 | STAM     | 0.4500 |
| ENSP00000265437 | ST7      | 0.4500 |
| ENSP00000269033 | SSH2     | 0.4500 |
| ENSP00000265896 | SQLE     | 0.4500 |
| ENSP00000365019 | SPIN1    | 0.4500 |
| ENSP00000297316 | SOX17    | 0.4500 |
| ENSP00000261368 | SNCAIP   | 0.4500 |
| ENSP00000355110 | SMOC1    | 0.4500 |
| ENSP00000263073 | SMG6     | 0.4500 |
| ENSP00000298085 | SLC7A3   | 0.4500 |
| ENSP00000336888 | SLC44A2  | 0.4500 |
| ENSP00000363807 | SLC39A7  | 0.4500 |
| ENSP00000246421 | SLC35E2  | 0.4500 |
| ENSP00000243896 | SLC35C2  | 0.4500 |
| ENSP00000363394 | SLC30A2  | 0.4500 |
| ENSP00000378920 | SLC26A6  | 0.4500 |
| ENSP00000265715 | SLC26A4  | 0.4500 |
| ENSP00000225665 | SLC25A11 | 0.4500 |
| ENSP00000215882 | SLC25A1  | 0.4500 |
| ENSP00000344322 | SLC23A2  | 0.4500 |
| ENSP00000278379 | SLC1A2   | 0.4500 |
| ENSP00000358640 | SLC16A1  | 0.4500 |
| ENSP00000365686 | SLC15A1  | 0.4500 |
| ENSP00000357022 | SLAMF7   | 0.4500 |
| ENSP00000319417 | SKA3     | 0.4500 |
| ENSP00000262901 | SIM1     | 0.4500 |
| ENSP00000368477 | SERP2    | 0.4500 |
| ENSP00000327197 | SENP5    | 0.4500 |
| ENSP00000270176 | SCYL1    | 0.4500 |
| ENSP00000358016 | SCML4    | 0.4500 |
| ENSP00000326247 | SAMD9L   | 0.4500 |
| ENSP00000350878 | S1PR3    | 0.4500 |
| ENSP00000325594 | RUFY1    | 0.4500 |
| ENSP00000222247 | RPL18A   | 0.4500 |
| ENSP00000255499 | RNF128   | 0.4500 |
| ENSP00000371434 | RFX3     | 0.4500 |
| ENSP00000233596 | REEP6    | 0.4500 |
| ENSP00000348538 | RBM38    | 0.4500 |
| ENSP00000255688 | RARRES3  | 0.4500 |
| ENSP00000362639 | RABEPK   | 0.4500 |
| ENSP00000272198 | PPFIA4   | 0.4500 |
| ENSP00000392553 | PPAPDC1B | 0.4500 |
| ENSP00000400036 | PLA2G4C  | 0.4500 |
| ENSP00000335618 | PITPNC1  | 0.4500 |
| ENSP00000334738 | PITPNB   | 0.4500 |
| ENSP00000369274 | PHKA2    | 0.4500 |
| ENSP00000362807 | PEF1     | 0.4500 |
| ENSP00000256404 | PEBP4    | 0.4500 |
| ENSP00000321804 | PAQR4    | 0.4500 |
| ENSP00000324270 | OXTR     | 0.4500 |
| ENSP00000358967 | OPN1LW   | 0.4500 |
| ENSP00000257627 | OCM2     | 0.4500 |
| ENSP00000381105 | NPS      | 0.4500 |

|                 |           |        |
|-----------------|-----------|--------|
| ENSP00000259526 | NOV       | 0.4500 |
| ENSP00000307853 | MUS81     | 0.4500 |
| ENSP00000441929 | MUC12     | 0.4500 |
| ENSP00000300057 | MESP1     | 0.4500 |
| ENSP00000325425 | MAT2B     | 0.4500 |
| ENSP00000296280 | MASP1     | 0.4500 |
| ENSP00000255681 | MACROD1   | 0.4500 |
| ENSP00000296581 | LSM6      | 0.4500 |
| ENSP00000346414 | LRRIQ3    | 0.4500 |
| ENSP00000344233 | LRRC43    | 0.4500 |
| ENSP00000310126 | LINGO2    | 0.4500 |
| ENSP00000293760 | LEMD2     | 0.4500 |
| ENSP00000348298 | LCOR      | 0.4500 |
| ENSP00000356162 | KISS1     | 0.4500 |
| ENSP00000377934 | KIF7      | 0.4500 |
| ENSP00000328494 | KIF21B    | 0.4500 |
| ENSP00000256707 | KIDINS220 | 0.4500 |
| ENSP00000300035 | KIAA0101  | 0.4500 |
| ENSP00000357067 | KCNJ9     | 0.4500 |
| ENSP00000314520 | KCNA2     | 0.4500 |
| ENSP00000395742 | JAM3      | 0.4500 |
| ENSP00000457016 | INO80E    | 0.4500 |
| ENSP00000308716 | INHBC     | 0.4500 |
| ENSP00000295228 | INHBB     | 0.4500 |
| ENSP00000229134 | IL26      | 0.4500 |
| ENSP00000233954 | IL1RL1    | 0.4500 |
| ENSP00000327824 | IFNLR1    | 0.4500 |
| ENSP00000382714 | IFITM2    | 0.4500 |
| ENSP00000337949 | HTR7      | 0.4500 |
| ENSP00000350549 | HMX3      | 0.4500 |
| ENSP00000417404 | HFE       | 0.4500 |
| ENSP00000216465 | GSTZ1     | 0.4500 |
| ENSP00000265276 | GPAM      | 0.4500 |
| ENSP00000362153 | GNL2      | 0.4500 |
| ENSP00000241502 | FYTTD1    | 0.4500 |
| ENSP00000259748 | FRS3      | 0.4500 |
| ENSP00000379369 | FOXB1     | 0.4500 |
| ENSP00000378368 | FLOT2     | 0.4500 |
| ENSP00000420213 | FLNB      | 0.4500 |
| ENSP00000307298 | FEM1B     | 0.4500 |
| ENSP00000285398 | ERCC3     | 0.4500 |
| ENSP00000228741 | ELK3      | 0.4500 |
| ENSP00000315011 | EDNRA     | 0.4500 |
| ENSP00000345575 | DNAJB12   | 0.4500 |
| ENSP00000361467 | DLG5      | 0.4500 |
| ENSP00000284690 | DHX32     | 0.4500 |
| ENSP00000408994 | DET1      | 0.4500 |
| ENSP00000328524 | DENND5A   | 0.4500 |
| ENSP00000357920 | DDO       | 0.4500 |
| ENSP00000451235 | DCAF8     | 0.4500 |
| ENSP00000315351 | D2HGDH    | 0.4500 |
| ENSP00000248901 | CYTH4     | 0.4500 |
| ENSP00000353820 | CYP2D6    | 0.4500 |

|                 |          |        |
|-----------------|----------|--------|
| ENSP00000260630 | CYP1B1   | 0.4500 |
| ENSP00000366124 | CST3     | 0.4500 |
| ENSP00000342015 | COX19    | 0.4500 |
| ENSP00000261037 | COL8A1   | 0.4500 |
| ENSP00000263665 | CNTN3    | 0.4500 |
| ENSP00000367276 | CKAP2    | 0.4500 |
| ENSP00000319851 | CHDH     | 0.4500 |
| ENSP00000356399 | CFH      | 0.4500 |
| ENSP00000332139 | CFD      | 0.4500 |
| ENSP00000402697 | CERS1    | 0.4500 |
| ENSP00000326432 | CCR8     | 0.4500 |
| ENSP00000441600 | CCR3     | 0.4500 |
| ENSP00000295926 | CCNL1    | 0.4500 |
| ENSP00000378118 | CCL8     | 0.4500 |
| ENSP00000311695 | CCDC85B  | 0.4500 |
| ENSP00000239374 | CCDC170  | 0.4500 |
| ENSP00000357057 | CASQ1    | 0.4500 |
| ENSP00000380523 | CAPSL    | 0.4500 |
| ENSP00000418081 | CACNA2D2 | 0.4500 |
| ENSP00000345824 | BZRAP1   | 0.4500 |
| ENSP00000446880 | BAZ2A    | 0.4500 |
| ENSP00000417190 | ATPAF2   | 0.4500 |
| ENSP00000313600 | ATP10B   | 0.4500 |
| ENSP00000284629 | ASZ1     | 0.4500 |
| ENSP00000388169 | ARPC4    | 0.4500 |
| ENSP00000420333 | ARMC8    | 0.4500 |
| ENSP00000326884 | ARFRP1   | 0.4500 |
| ENSP00000320247 | AQP6     | 0.4500 |
| ENSP00000360998 | ANKRD22  | 0.4500 |
| ENSP00000359100 | AMY1A    | 0.4500 |
| ENSP00000298375 | AKR1E2   | 0.4500 |
| ENSP00000417935 | AKR1CL1  | 0.4500 |
| ENSP00000279146 | AIP      | 0.4500 |
| ENSP00000349436 | ADAM15   | 0.4500 |
| ENSP00000205214 | AASDH    | 0.4500 |
| ENSP00000209873 | AAAS     | 0.4500 |
| ENSP00000316746 | PRF1     | 0.4500 |
| ENSP00000369774 | ZNF763   | 0.4474 |
| ENSP00000337386 | ZFP36L1  | 0.4474 |
| ENSP00000293883 | WDR24    | 0.4474 |
| ENSP00000333255 | VMA21    | 0.4474 |
| ENSP00000305647 | VAMP5    | 0.4474 |
| ENSP00000366006 | UBIAD1   | 0.4474 |
| ENSP00000260505 | TLL7     | 0.4474 |
| ENSP00000262839 | TRPC5    | 0.4474 |
| ENSP00000323913 | TRIM55   | 0.4474 |
| ENSP00000316990 | TRAPPC5  | 0.4474 |
| ENSP00000469049 | TNFSF14  | 0.4474 |
| ENSP00000386443 | TGOLN2   | 0.4474 |
| ENSP00000300086 | TERF2IP  | 0.4474 |
| ENSP00000440704 | SYTL1    | 0.4474 |
| ENSP00000341282 | SYCE1    | 0.4474 |
| ENSP00000276646 | SYBU     | 0.4474 |

|                 |              |        |
|-----------------|--------------|--------|
| ENSP00000398789 | SNX13        | 0.4474 |
| ENSP00000256958 | SLCO1B1      | 0.4474 |
| ENSP00000004531 | SLC7A2       | 0.4474 |
| ENSP00000231706 | SLC7A14      | 0.4474 |
| ENSP00000269740 | SLC39A3      | 0.4474 |
| ENSP00000316596 | SLC38A9      | 0.4474 |
| ENSP00000311833 | SLC37A2      | 0.4474 |
| ENSP00000245680 | SLC35F5      | 0.4474 |
| ENSP00000367770 | SLC35B4      | 0.4474 |
| ENSP00000330141 | SLC16A5      | 0.4474 |
| ENSP00000370381 | SLC12A1      | 0.4474 |
| ENSP00000370299 | SHROOM2      | 0.4474 |
| ENSP00000268989 | SGSM2        | 0.4474 |
| ENSP00000376268 | SEC14L1      | 0.4474 |
| ENSP00000345599 | SCXA         | 0.4474 |
| ENSP00000386306 | SCN9A        | 0.4474 |
| ENSP00000322460 | SCN4B        | 0.4474 |
| ENSP00000415178 | RP4-539M6.19 | 0.4474 |
| ENSP00000308219 | RGMB         | 0.4474 |
| ENSP00000405038 | REXO1L11P    | 0.4474 |
| ENSP00000300069 | RBPM52       | 0.4474 |
| ENSP00000309166 | RBM4         | 0.4474 |
| ENSP00000298854 | RAPSN        | 0.4474 |
| ENSP00000302647 | RALGAPA1     | 0.4474 |
| ENSP00000281171 | PTPRO        | 0.4474 |
| ENSP00000263708 | PTPN4        | 0.4474 |
| ENSP00000332812 | PTGDR2       | 0.4474 |
| ENSP00000272645 | POLR2D       | 0.4474 |
| ENSP00000402861 | PLCL1        | 0.4474 |
| ENSP00000371833 | PLA2G4F      | 0.4474 |
| ENSP00000225609 | PIGL         | 0.4474 |
| ENSP00000383168 | PCBP3        | 0.4474 |
| ENSP00000351618 | PARD3B       | 0.4474 |
| ENSP00000217386 | OXT          | 0.4474 |
| ENSP00000457258 | OGFOD1       | 0.4474 |
| ENSP00000348831 | NUDT10       | 0.4474 |
| ENSP00000261402 | NUAK1        | 0.4474 |
| ENSP00000287667 | NOMO1        | 0.4474 |
| ENSP00000283429 | NMRAL1       | 0.4474 |
| ENSP00000354159 | NLRC4        | 0.4474 |
| ENSP00000253719 | NAPSA        | 0.4474 |
| ENSP00000384288 | MYCBP2       | 0.4474 |
| ENSP00000221086 | MTMR9        | 0.4474 |
| ENSP00000325285 | MTMR4        | 0.4474 |
| ENSP00000436767 | MTG1         | 0.4474 |
| ENSP00000347277 | MRPL52       | 0.4474 |
| ENSP00000258383 | MRPL44       | 0.4474 |
| ENSP00000261326 | MOCOS        | 0.4474 |
| ENSP00000383820 | MIER1        | 0.4474 |
| ENSP00000262843 | MID2         | 0.4474 |
| ENSP00000296755 | MAP1B        | 0.4474 |
| ENSP00000313021 | MAK          | 0.4474 |
| ENSP00000264265 | LXN          | 0.4474 |

|                 |              |        |
|-----------------|--------------|--------|
| ENSP00000356548 | LTV1         | 0.4474 |
| ENSP00000419542 | LRRC55       | 0.4474 |
| ENSP00000446121 | LIMS1        | 0.4474 |
| ENSP00000413479 | KRT3         | 0.4474 |
| ENSP00000285407 | KLF10        | 0.4474 |
| ENSP00000260753 | KIF20B       | 0.4474 |
| ENSP00000397239 | KDM4E        | 0.4474 |
| ENSP00000391498 | KCNK16       | 0.4474 |
| ENSP00000229447 | IYD          | 0.4474 |
| ENSP00000411822 | ISY1-RAB43   | 0.4474 |
| ENSP00000330408 | IST1         | 0.4474 |
| ENSP00000344741 | INSIG1       | 0.4474 |
| ENSP00000269159 | IMPA2        | 0.4474 |
| ENSP00000258729 | IGF2BP3      | 0.4474 |
| ENSP00000296051 | HPS3         | 0.4474 |
| ENSP00000363614 | HMGCL        | 0.4474 |
| ENSP00000364076 | HLA-DQA2     | 0.4474 |
| ENSP00000355657 | HIST3H3      | 0.4474 |
| ENSP00000366962 | HIST1H2BI    | 0.4474 |
| ENSP00000341214 | HIST1H1T     | 0.4474 |
| ENSP00000396452 | HDHD1        | 0.4474 |
| ENSP00000206474 | HAUS4        | 0.4474 |
| ENSP00000264108 | HAT1         | 0.4474 |
| ENSP00000415430 | GTSE1        | 0.4474 |
| ENSP00000363296 | GRM4         | 0.4474 |
| ENSP00000367343 | GBA2         | 0.4474 |
| ENSP00000381549 | FRMD4B       | 0.4474 |
| ENSP00000365898 | FOXB2        | 0.4474 |
| ENSP00000356729 | FMO3         | 0.4474 |
| ENSP00000209929 | FMO2         | 0.4474 |
| ENSP00000279227 | FERMT3       | 0.4474 |
| ENSP00000423630 | FBXL7        | 0.4474 |
| ENSP00000417601 | FBXL2        | 0.4474 |
| ENSP00000354497 | FAN1         | 0.4474 |
| ENSP00000244869 | EREG         | 0.4474 |
| ENSP00000400376 | ERAP2        | 0.4474 |
| ENSP00000379383 | ENAM         | 0.4474 |
| ENSP00000417183 | DUSP7        | 0.4474 |
| ENSP00000355958 | DTL          | 0.4474 |
| ENSP00000339208 | DPP8         | 0.4474 |
| ENSP00000452037 | DNAL1        | 0.4474 |
| ENSP00000316670 | DHRS9        | 0.4474 |
| ENSP00000391167 | DENND4A      | 0.4474 |
| ENSP00000414906 | DCTN4        | 0.4474 |
| ENSP00000367715 | DCDC2        | 0.4474 |
| ENSP00000261891 | DAPK2        | 0.4474 |
| ENSP00000260682 | CYP2C9       | 0.4474 |
| ENSP00000438788 | CUL7         | 0.4474 |
| ENSP00000470383 | CTC-273B12.7 | 0.4474 |
| ENSP00000389026 | CRISP3       | 0.4474 |
| ENSP00000433459 | CREBZF       | 0.4474 |
| ENSP00000410396 | CMSS1        | 0.4474 |
| ENSP00000342991 | CLYBL        | 0.4474 |

|                 |          |        |
|-----------------|----------|--------|
| ENSP00000372193 | CLCN7    | 0.4474 |
| ENSP00000269878 | CIB3     | 0.4474 |
| ENSP00000384400 | CHKB     | 0.4474 |
| ENSP00000262450 | CHD5     | 0.4474 |
| ENSP00000349696 | CEPT1    | 0.4474 |
| ENSP00000369075 | CENPB    | 0.4474 |
| ENSP00000199764 | CEACAM6  | 0.4474 |
| ENSP00000358501 | CD58     | 0.4474 |
| ENSP00000316333 | CD55     | 0.4474 |
| ENSP00000317310 | CABP1    | 0.4474 |
| ENSP00000216115 | BIK      | 0.4474 |
| ENSP00000369647 | AVP      | 0.4474 |
| ENSP00000397259 | ATXN7L3  | 0.4474 |
| ENSP00000338769 | ASAP3    | 0.4474 |
| ENSP00000268042 | ARRDC4   | 0.4474 |
| ENSP00000249601 | ARHGAP22 | 0.4474 |
| ENSP00000336762 | ANG      | 0.4474 |
| ENSP00000403270 | AGAP9    | 0.4474 |
| ENSP00000308549 | ADORA1   | 0.4474 |
| ENSP00000364555 | ACTL8    | 0.4474 |
| ENSP00000303246 | ACOT12   | 0.4474 |
| ENSP00000285238 | ABCC3    | 0.4474 |
| ENSP00000264159 | ZRANB3   | 0.4447 |
| ENSP00000257940 | ZC3H10   | 0.4447 |
| ENSP00000308179 | WDR3     | 0.4447 |
| ENSP00000295888 | WDFY3    | 0.4447 |
| ENSP00000397879 | VPS8     | 0.4447 |
| ENSP00000303129 | VAT1L    | 0.4447 |
| ENSP00000369681 | USP3     | 0.4447 |
| ENSP00000351596 | TTC37    | 0.4447 |
| ENSP00000333018 | TTC32    | 0.4447 |
| ENSP00000303452 | TRH      | 0.4447 |
| ENSP00000217121 | TPD52L2  | 0.4447 |
| ENSP00000389998 | TMEM67   | 0.4447 |
| ENSP00000411099 | TLK1     | 0.4447 |
| ENSP00000262968 | TJP3     | 0.4447 |
| ENSP00000291526 | TFF2     | 0.4447 |
| ENSP00000008391 | TFAP2D   | 0.4447 |
| ENSP00000279386 | TBX6     | 0.4447 |
| ENSP00000321703 | TACC1    | 0.4447 |
| ENSP00000346265 | SYT5     | 0.4447 |
| ENSP00000255613 | SUV420H2 | 0.4447 |
| ENSP00000360515 | SUPT3H   | 0.4447 |
| ENSP00000350734 | ST7L     | 0.4447 |
| ENSP00000312318 | SSSCA1   | 0.4447 |
| ENSP00000312081 | SSH3     | 0.4447 |
| ENSP00000315713 | SSH1     | 0.4447 |
| ENSP00000261854 | SPPL2A   | 0.4447 |
| ENSP00000265295 | SPDL1    | 0.4447 |
| ENSP00000295269 | SLC9A4   | 0.4447 |
| ENSP00000233969 | SLC9A2   | 0.4447 |
| ENSP00000261622 | SLC7A5   | 0.4447 |
| ENSP00000371483 | SLC34A2  | 0.4447 |

|                 |           |        |
|-----------------|-----------|--------|
| ENSP00000321424 | SLC34A1   | 0.4447 |
| ENSP00000233535 | SLC30A3   | 0.4447 |
| ENSP00000279178 | SLC22A9   | 0.4447 |
| ENSP00000444408 | SLC1A5    | 0.4447 |
| ENSP00000234256 | SLC1A4    | 0.4447 |
| ENSP00000227880 | SLC15A3   | 0.4447 |
| ENSP00000417085 | SLC15A2   | 0.4447 |
| ENSP00000316905 | SFXN1     | 0.4447 |
| ENSP00000370115 | SERPINB1  | 0.4447 |
| ENSP00000361867 | SEMG1     | 0.4447 |
| ENSP00000418910 | SELT      | 0.4447 |
| ENSP00000360593 | SELRC1    | 0.4447 |
| ENSP00000281142 | SCLT1     | 0.4447 |
| ENSP00000350333 | SAP130    | 0.4447 |
| ENSP00000339521 | RSU1      | 0.4447 |
| ENSP00000254605 | RRP8      | 0.4447 |
| ENSP00000322419 | RPLP2     | 0.4447 |
| ENSP00000360120 | ROR1      | 0.4447 |
| ENSP00000444777 | REXO1L10P | 0.4447 |
| ENSP00000258428 | REV1      | 0.4447 |
| ENSP00000413929 | RCOR3     | 0.4447 |
| ENSP00000265271 | RBM27     | 0.4447 |
| ENSP00000368341 | RBM24     | 0.4447 |
| ENSP00000199814 | RBM22     | 0.4447 |
| ENSP00000376440 | RAD9B     | 0.4447 |
| ENSP00000340879 | RAD1      | 0.4447 |
| ENSP00000386212 | PSMB11    | 0.4447 |
| ENSP00000358224 | PPIAL4C   | 0.4447 |
| ENSP00000443989 | PPIAL4B   | 0.4447 |
| ENSP00000215591 | POLRMT    | 0.4447 |
| ENSP00000216832 | PNN       | 0.4447 |
| ENSP00000358242 | PNISR     | 0.4447 |
| ENSP00000276914 | PLIN2     | 0.4447 |
| ENSP00000367391 | PGA4      | 0.4447 |
| ENSP00000322192 | PGA3      | 0.4447 |
| ENSP00000356563 | PEX3      | 0.4447 |
| ENSP00000349016 | PEX14     | 0.4447 |
| ENSP00000280154 | PDCD4     | 0.4447 |
| ENSP00000353739 | PCMTD1    | 0.4447 |
| ENSP00000299299 | PCBD1     | 0.4447 |
| ENSP00000358747 | OVGP1     | 0.4447 |
| ENSP00000272371 | OTOF      | 0.4447 |
| ENSP00000261183 | OSBPL8    | 0.4447 |
| ENSP00000354652 | NPY1R     | 0.4447 |
| ENSP00000342848 | NOXA1     | 0.4447 |
| ENSP00000242994 | NEUROD4   | 0.4447 |
| ENSP00000349654 | NELL1     | 0.4447 |
| ENSP00000253814 | NDFIP1    | 0.4447 |
| ENSP00000352272 | MYOZ1     | 0.4447 |
| ENSP00000396774 | MUC20     | 0.4447 |
| ENSP00000303222 | MTCH2     | 0.4447 |
| ENSP00000355084 | MSRB1     | 0.4447 |
| ENSP00000318158 | MRPS24    | 0.4447 |



|                 |           |        |
|-----------------|-----------|--------|
| ENSP00000320184 | MRPS23    | 0.4447 |
| ENSP00000313437 | MMP19     | 0.4447 |
| ENSP00000215754 | MIF       | 0.4447 |
| ENSP00000259050 | MARCH7    | 0.4447 |
| ENSP00000320043 | LYPLA1    | 0.4447 |
| ENSP00000296144 | LRRC2     | 0.4447 |
| ENSP00000262134 | LPCAT2    | 0.4447 |
| ENSP00000175091 | LAPTM4A   | 0.4447 |
| ENSP00000272797 | KLHL23    | 0.4447 |
| ENSP00000313995 | KLHDC3    | 0.4447 |
| ENSP00000354560 | KIFAP3    | 0.4447 |
| ENSP00000385215 | KIAA1009  | 0.4447 |
| ENSP00000384391 | KCTD17    | 0.4447 |
| ENSP00000365198 | KAZN      | 0.4447 |
| ENSP00000371734 | KANK1     | 0.4447 |
| ENSP00000358310 | ITGA10    | 0.4447 |
| ENSP00000355961 | INTS7     | 0.4447 |
| ENSP00000358865 | INA       | 0.4447 |
| ENSP00000328133 | IL20RB    | 0.4447 |
| ENSP00000260049 | IL18BP    | 0.4447 |
| ENSP00000233809 | IGFBP2    | 0.4447 |
| ENSP00000280097 | HNMT      | 0.4447 |
| ENSP00000363976 | HLA-DMA   | 0.4447 |
| ENSP00000332790 | HIST2H2AB | 0.4447 |
| ENSP00000321744 | HIST1H2BC | 0.4447 |
| ENSP00000339566 | HIST1H1C  | 0.4447 |
| ENSP00000294973 | HAAO      | 0.4447 |
| ENSP00000445162 | GTF2H3    | 0.4447 |
| ENSP00000253237 | GRWD1     | 0.4447 |
| ENSP00000256857 | GRP       | 0.4447 |
| ENSP00000293190 | GRIN2C    | 0.4447 |
| ENSP00000294409 | GMEB1     | 0.4447 |
| ENSP00000371398 | GLIS3     | 0.4447 |
| ENSP00000326227 | GANC      | 0.4447 |
| ENSP00000355632 | GALNT2    | 0.4447 |
| ENSP00000360488 | FRA10AC1  | 0.4447 |
| ENSP00000318716 | FAM9B     | 0.4447 |
| ENSP00000362409 | FAM129B   | 0.4447 |
| ENSP00000328103 | EIF4ENIF1 | 0.4447 |
| ENSP00000355480 | EFCAB2    | 0.4447 |
| ENSP00000270517 | ECSIT     | 0.4447 |
| ENSP00000367841 | DYNLT3    | 0.4447 |
| ENSP00000412178 | DGKZ      | 0.4447 |
| ENSP00000412292 | DEPDC1    | 0.4447 |
| ENSP00000448051 | DAZAP2    | 0.4447 |
| ENSP00000310721 | CYP7B1    | 0.4447 |
| ENSP00000360968 | CYP4X1    | 0.4447 |
| ENSP00000337915 | CYP3A4    | 0.4447 |
| ENSP00000360317 | CYP2C8    | 0.4447 |
| ENSP00000357204 | CRABP2    | 0.4447 |
| ENSP00000366787 | CNTNAP3B  | 0.4447 |
| ENSP00000388872 | CLUH      | 0.4447 |
| ENSP00000433919 | CLNS1A    | 0.4447 |

|                 |           |        |
|-----------------|-----------|--------|
| ENSP00000353073 | CLN3      | 0.4447 |
| ENSP00000405577 | CLMP      | 0.4447 |
| ENSP00000247153 | CFP       | 0.4447 |
| ENSP00000355089 | CELF4     | 0.4447 |
| ENSP00000253693 | CAPN7     | 0.4447 |
| ENSP00000438949 | CACNB4    | 0.4447 |
| ENSP00000385019 | CACNA1I   | 0.4447 |
| ENSP00000334198 | CACNA1H   | 0.4447 |
| ENSP00000293255 | CABP5     | 0.4447 |
| ENSP00000256925 | CABLES1   | 0.4447 |
| ENSP00000310696 | B4GALT2   | 0.4447 |
| ENSP00000272238 | ATP6V1C2  | 0.4447 |
| ENSP00000364349 | ATF6B     | 0.4447 |
| ENSP00000222250 | ARRDC2    | 0.4447 |
| ENSP00000363832 | AOX1      | 0.4447 |
| ENSP00000370254 | AKR1C1    | 0.4447 |
| ENSP00000379514 | ADCYAP1R1 | 0.4447 |
| ENSP00000382349 | ACSM4     | 0.4447 |
| ENSP00000238651 | ACOT2     | 0.4447 |
| ENSP00000411096 | ABCA13    | 0.4447 |
| ENSP00000429734 | 61E3.4    | 0.4447 |
| ENSP00000299927 | ZNF592    | 0.4421 |
| ENSP00000340796 | ZNF326    | 0.4421 |
| ENSP00000278856 | WDR74     | 0.4421 |
| ENSP00000261167 | WBP11     | 0.4421 |
| ENSP00000376504 | VWA5A     | 0.4421 |
| ENSP00000301962 | USP42     | 0.4421 |
| ENSP00000294119 | UBXN1     | 0.4421 |
| ENSP00000217173 | UBOX5     | 0.4421 |
| ENSP00000305654 | TVP23B    | 0.4421 |
| ENSP00000370031 | TTC8      | 0.4421 |
| ENSP00000295314 | TMOD4     | 0.4421 |
| ENSP00000288025 | TMED6     | 0.4421 |
| ENSP00000370867 | TGM3      | 0.4421 |
| ENSP00000207157 | TBX15     | 0.4421 |
| ENSP00000294168 | TAF6L     | 0.4421 |
| ENSP00000258052 | SMPD2     | 0.4421 |
| ENSP00000296422 | SLC9B1    | 0.4421 |
| ENSP00000379326 | SLC5A12   | 0.4421 |
| ENSP00000363891 | SLC38A10  | 0.4421 |
| ENSP00000345528 | SLC35F6   | 0.4421 |
| ENSP00000339626 | SLC35E4   | 0.4421 |
| ENSP00000350278 | SLC30A7   | 0.4421 |
| ENSP00000263093 | SLC27A5   | 0.4421 |
| ENSP00000286298 | SLC26A2   | 0.4421 |
| ENSP00000400101 | SLC25A13  | 0.4421 |
| ENSP00000302851 | SLC23A1   | 0.4421 |
| ENSP00000290399 | SIM2      | 0.4421 |
| ENSP00000223095 | SERPINE1  | 0.4421 |
| ENSP00000338358 | SERPINB6  | 0.4421 |
| ENSP00000292169 | S100A1    | 0.4421 |
| ENSP00000346080 | RPL22L1   | 0.4421 |
| ENSP00000341905 | RASAL3    | 0.4421 |

|                 |          |        |
|-----------------|----------|--------|
| ENSP00000359607 | PYROXD2  | 0.4421 |
| ENSP00000332706 | PURA     | 0.4421 |
| ENSP00000334941 | PTPRU    | 0.4421 |
| ENSP00000363459 | PTPN20A  | 0.4421 |
| ENSP00000360687 | PTGDS    | 0.4421 |
| ENSP00000301175 | PRODH2   | 0.4421 |
| ENSP00000408342 | PRAM1    | 0.4421 |
| ENSP00000354218 | PPP1R13L | 0.4421 |
| ENSP00000360296 | PPAP2B   | 0.4421 |
| ENSP00000373702 | PP2D1    | 0.4421 |
| ENSP00000349205 | PIK3R4   | 0.4421 |
| ENSP00000339382 | PIGO     | 0.4421 |
| ENSP00000410626 | PHRF1    | 0.4421 |
| ENSP00000349543 | PEX2     | 0.4421 |
| ENSP00000402551 | OTUB1    | 0.4421 |
| ENSP00000380193 | NRL      | 0.4421 |
| ENSP00000345752 | MTMR2    | 0.4421 |
| ENSP00000355304 | MOK      | 0.4421 |
| ENSP00000301327 | MFSD3    | 0.4421 |
| ENSP00000339047 | LRRC61   | 0.4421 |
| ENSP00000302621 | LRG1     | 0.4421 |
| ENSP00000262301 | LMF1     | 0.4421 |
| ENSP00000278193 | LIN7C    | 0.4421 |
| ENSP00000428765 | LETM2    | 0.4421 |
| ENSP00000369317 | KRT6A    | 0.4421 |
| ENSP00000229402 | KLRB1    | 0.4421 |
| ENSP00000343930 | KLHL17   | 0.4421 |
| ENSP00000344820 | KCNK7    | 0.4421 |
| ENSP00000295082 | KCNF1    | 0.4421 |
| ENSP00000327290 | ITGA11   | 0.4421 |
| ENSP00000270800 | IL22RA1  | 0.4421 |
| ENSP00000302935 | IL16     | 0.4421 |
| ENSP00000343552 | ICMT     | 0.4421 |
| ENSP00000314736 | HYDIN    | 0.4421 |
| ENSP00000372224 | HGFAC    | 0.4421 |
| ENSP00000304185 | GTSF1    | 0.4421 |
| ENSP00000426120 | GRAMD3   | 0.4421 |
| ENSP00000371420 | GPNMB    | 0.4421 |
| ENSP00000241125 | GJA3     | 0.4421 |
| ENSP00000350005 | GIP      | 0.4421 |
| ENSP00000383558 | GCGR     | 0.4421 |
| ENSP00000344012 | GAS2L1   | 0.4421 |
| ENSP00000364150 | GALNT12  | 0.4421 |
| ENSP00000261304 | GALC     | 0.4421 |
| ENSP00000236166 | FMO6P    | 0.4421 |
| ENSP00000386722 | FCHSD2   | 0.4421 |
| ENSP00000367910 | FANCG    | 0.4421 |
| ENSP00000272610 | FAHD2B   | 0.4421 |
| ENSP00000296677 | F2RL1    | 0.4421 |
| ENSP00000384957 | F11      | 0.4421 |
| ENSP00000265038 | ERCC8    | 0.4421 |
| ENSP00000416892 | EIF3L    | 0.4421 |
| ENSP00000320130 | DYNC1I1  | 0.4421 |

|                 |               |        |
|-----------------|---------------|--------|
| ENSP00000357087 | DUSP23        | 0.4421 |
| ENSP00000257198 | DSC1          | 0.4421 |
| ENSP00000315988 | DPY19L2       | 0.4421 |
| ENSP00000294618 | DOCK6         | 0.4421 |
| ENSP00000251473 | DKFZP761J1410 | 0.4421 |
| ENSP00000252137 | DGCR14        | 0.4421 |
| ENSP00000297439 | DEFB1         | 0.4421 |
| ENSP00000415556 | DCAF11        | 0.4421 |
| ENSP00000274867 | DAAM2         | 0.4421 |
| ENSP00000252945 | CYP2E1        | 0.4421 |
| ENSP00000343900 | CPSF4L        | 0.4421 |
| ENSP00000234301 | COX7A2L       | 0.4421 |
| ENSP00000354762 | COA3          | 0.4421 |
| ENSP00000359285 | CHRNA4        | 0.4421 |
| ENSP00000372750 | CHRM5         | 0.4421 |
| ENSP00000361923 | CHCHD1        | 0.4421 |
| ENSP00000360918 | CH25H         | 0.4421 |
| ENSP00000364389 | CDC14B        | 0.4421 |
| ENSP00000335657 | CCK           | 0.4421 |
| ENSP00000260508 | CCBL2         | 0.4421 |
| ENSP00000398481 | CADPS2        | 0.4421 |
| ENSP00000373215 | CADPS         | 0.4421 |
| ENSP00000419101 | CACNA2D3      | 0.4421 |
| ENSP00000289388 | C2orf62       | 0.4421 |
| ENSP00000255192 | BHMT2         | 0.4421 |
| ENSP00000243578 | B9D2          | 0.4421 |
| ENSP00000257861 | AVIL          | 0.4421 |
| ENSP00000371070 | ATP8A2        | 0.4421 |
| ENSP00000352522 | ATP6V1H       | 0.4421 |
| ENSP00000451575 | ASB2          | 0.4421 |
| ENSP00000259477 | ARPC5L        | 0.4421 |
| ENSP00000270747 | ARHGEF19      | 0.4421 |
| ENSP00000221891 | APLP1         | 0.4421 |
| ENSP00000400325 | AP000350.10   | 0.4421 |
| ENSP00000297837 | ANKS6         | 0.4421 |
| ENSP00000369530 | ALOX15B       | 0.4421 |
| ENSP00000346577 | AK5           | 0.4421 |
| ENSP00000369960 | ADRA1A        | 0.4421 |
| ENSP00000381036 | ADGB          | 0.4421 |
| ENSP00000357668 | ADAM12        | 0.4421 |
| ENSP00000360165 | ACTRT1        | 0.4421 |
| ENSP00000363799 | ACTL7B        | 0.4421 |
| ENSP00000454833 | AC025263.3    | 0.4421 |
| ENSP00000352676 | ZRANB1        | 0.4395 |
| ENSP00000262096 | ZDHHC2        | 0.4395 |
| ENSP00000327821 | XPOT          | 0.4395 |
| ENSP00000287380 | WDR67         | 0.4395 |
| ENSP00000382717 | WDR19         | 0.4395 |
| ENSP00000347872 | VAT1          | 0.4395 |
| ENSP00000229268 | USP5          | 0.4395 |
| ENSP00000320401 | UGT2B17       | 0.4395 |
| ENSP00000301281 | UBXN6         | 0.4395 |
| ENSP00000268483 | TXNL4B        | 0.4395 |

|                 |              |        |
|-----------------|--------------|--------|
| ENSP00000304908 | TXNDC2       | 0.4395 |
| ENSP00000380897 | TRPM1        | 0.4395 |
| ENSP00000426070 | TRPC7        | 0.4395 |
| ENSP00000273962 | TRMT10A      | 0.4395 |
| ENSP00000424048 | TRIM39-RPP21 | 0.4395 |
| ENSP00000272424 | TPRKB        | 0.4395 |
| ENSP00000233143 | TMSB10       | 0.4395 |
| ENSP00000422473 | TMEM33       | 0.4395 |
| ENSP00000375975 | TMCO1        | 0.4395 |
| ENSP00000287814 | TIMP4        | 0.4395 |
| ENSP00000220616 | TG           | 0.4395 |
| ENSP00000343995 | TEKT3        | 0.4395 |
| ENSP00000369736 | TBCA         | 0.4395 |
| ENSP00000440207 | TBC1D30      | 0.4395 |
| ENSP00000225235 | TBC1D12      | 0.4395 |
| ENSP00000355051 | TAF13        | 0.4395 |
| ENSP00000358531 | SYCP1        | 0.4395 |
| ENSP00000361042 | SURF1        | 0.4395 |
| ENSP00000353007 | SULF2        | 0.4395 |
| ENSP00000216218 | ST13         | 0.4395 |
| ENSP00000282074 | SPC25        | 0.4395 |
| ENSP00000320378 | SLC7A8       | 0.4395 |
| ENSP00000261024 | SLC40A1      | 0.4395 |
| ENSP00000300456 | SLC27A4      | 0.4395 |
| ENSP00000360855 | SLC16A12     | 0.4395 |
| ENSP00000261994 | SERPINA10    | 0.4395 |
| ENSP00000460441 | SEPT1        | 0.4395 |
| ENSP00000350215 | SEMA5B       | 0.4395 |
| ENSP00000358071 | SEC23IP      | 0.4395 |
| ENSP00000215812 | SEC14L3      | 0.4395 |
| ENSP00000367197 | SCGN         | 0.4395 |
| ENSP00000296370 | S100P        | 0.4395 |
| ENSP00000321449 | RRP7A        | 0.4395 |
| ENSP00000420821 | RPL41        | 0.4395 |
| ENSP00000367766 | RPGR         | 0.4395 |
| ENSP00000346402 | RNH1         | 0.4395 |
| ENSP00000385328 | RNF43        | 0.4395 |
| ENSP00000386229 | RGS14        | 0.4395 |
| ENSP00000309163 | RCE1         | 0.4395 |
| ENSP00000318415 | RBMXL1       | 0.4395 |
| ENSP00000264808 | PRDM5        | 0.4395 |
| ENSP00000383402 | PPP4R1       | 0.4395 |
| ENSP00000382058 | POLR3G       | 0.4395 |
| ENSP00000345988 | PLCH1        | 0.4395 |
| ENSP00000393847 | PLA2G10      | 0.4395 |
| ENSP00000354775 | PJA2         | 0.4395 |
| ENSP00000379496 | PDE1C        | 0.4395 |
| ENSP00000353868 | PCED1A       | 0.4395 |
| ENSP00000412733 | OSBPL9       | 0.4395 |
| ENSP00000304854 | NUDCD2       | 0.4395 |
| ENSP00000313169 | NPHP1        | 0.4395 |
| ENSP00000275857 | NLGN4X       | 0.4395 |
| ENSP00000216286 | NID2         | 0.4395 |

|                 |           |        |
|-----------------|-----------|--------|
| ENSP00000299821 | NCAPH2    | 0.4395 |
| ENSP00000334563 | MYO18B    | 0.4395 |
| ENSP00000180173 | MTMR7     | 0.4395 |
| ENSP00000342343 | MED22     | 0.4395 |
| ENSP00000302537 | MDM1      | 0.4395 |
| ENSP00000324944 | MBOAT1    | 0.4395 |
| ENSP00000351813 | MARCH5    | 0.4395 |
| ENSP00000330572 | MAPK8IP2  | 0.4395 |
| ENSP00000443900 | LYRM4     | 0.4395 |
| ENSP00000373846 | LTN1      | 0.4395 |
| ENSP00000337224 | LRAT      | 0.4395 |
| ENSP00000451812 | LIN52     | 0.4395 |
| ENSP00000272134 | LEFTY1    | 0.4395 |
| ENSP00000217407 | LBP       | 0.4395 |
| ENSP00000336721 | LARP1     | 0.4395 |
| ENSP00000380982 | KIAA0020  | 0.4395 |
| ENSP00000306497 | KCNJ4     | 0.4395 |
| ENSP00000328150 | KCNJ12    | 0.4395 |
| ENSP00000331727 | KCNH7     | 0.4395 |
| ENSP00000356087 | IKBKE     | 0.4395 |
| ENSP00000357113 | IFI16     | 0.4395 |
| ENSP00000370748 | IDI1      | 0.4395 |
| ENSP00000367959 | HTR2A     | 0.4395 |
| ENSP00000328269 | HMG20B    | 0.4395 |
| ENSP00000303408 | HIST1H2BO | 0.4395 |
| ENSP00000303373 | HIST1H2AE | 0.4395 |
| ENSP00000283871 | HGD       | 0.4395 |
| ENSP00000253669 | HAUS8     | 0.4395 |
| ENSP00000263956 | GTF3C3    | 0.4395 |
| ENSP00000433511 | GRK6      | 0.4395 |
| ENSP00000264126 | GPSM2     | 0.4395 |
| ENSP00000468772 | GPS2      | 0.4395 |
| ENSP00000356581 | GPR126    | 0.4395 |
| ENSP00000300406 | GNGT2     | 0.4395 |
| ENSP00000359675 | GNG5      | 0.4395 |
| ENSP00000370194 | GMDS      | 0.4395 |
| ENSP00000308533 | GEMIN2    | 0.4395 |
| ENSP00000255759 | FOPNL     | 0.4395 |
| ENSP00000303423 | FNTA      | 0.4395 |
| ENSP00000359506 | FMR1      | 0.4395 |
| ENSP00000278840 | FADS2     | 0.4395 |
| ENSP00000220562 | EXTL3     | 0.4395 |
| ENSP00000296754 | ERAP1     | 0.4395 |
| ENSP00000332656 | ENPP7     | 0.4395 |
| ENSP00000337128 | EDN3      | 0.4395 |
| ENSP00000314810 | EDDM3B    | 0.4395 |
| ENSP00000307850 | DRAP1     | 0.4395 |
| ENSP00000389630 | DPY19L4   | 0.4395 |
| ENSP00000254579 | DNHD1     | 0.4395 |
| ENSP00000288111 | DHRS1     | 0.4395 |
| ENSP00000367454 | DFFB      | 0.4395 |
| ENSP00000373734 | DENND5B   | 0.4395 |
| ENSP00000359446 | CPN1      | 0.4395 |

|                 |          |        |
|-----------------|----------|--------|
| ENSP00000359225 | CNN3     | 0.4395 |
| ENSP00000419395 | CDNF     | 0.4395 |
| ENSP00000370588 | CD99     | 0.4395 |
| ENSP00000298546 | C9orf9   | 0.4395 |
| ENSP00000216038 | C22orf28 | 0.4395 |
| ENSP00000255608 | BTBD2    | 0.4395 |
| ENSP00000350914 | BDH1     | 0.4395 |
| ENSP00000233997 | AZU1     | 0.4395 |
| ENSP00000342481 | ATP9A    | 0.4395 |
| ENSP00000311318 | ATG4D    | 0.4395 |
| ENSP00000421315 | AQP1     | 0.4395 |
| ENSP00000359224 | ALG14    | 0.4395 |
| ENSP00000310120 | ALG10B   | 0.4395 |
| ENSP00000367658 | ACTRT2   | 0.4395 |
| ENSP00000326491 | ABHD1    | 0.4395 |
| ENSP00000349017 | ABCC11   | 0.4395 |
| ENSP00000253577 | ABCB7    | 0.4395 |
| ENSP00000435509 | ZIC4     | 0.4368 |
| ENSP00000294258 | ZFPL1    | 0.4368 |
| ENSP00000324463 | YLPM1    | 0.4368 |
| ENSP00000428619 | UTP14C   | 0.4368 |
| ENSP00000297229 | USP49    | 0.4368 |
| ENSP00000263897 | USE1     | 0.4368 |
| ENSP00000312107 | UBXN2A   | 0.4368 |
| ENSP00000313953 | TTC27    | 0.4368 |
| ENSP00000329858 | TRMT12   | 0.4368 |
| ENSP00000169551 | TIMM21   | 0.4368 |
| ENSP00000258449 | TGFBRAP1 | 0.4368 |
| ENSP00000366036 | TBC1D8   | 0.4368 |
| ENSP00000390761 | TBC1D3C  | 0.4368 |
| ENSP00000395220 | SYTL5    | 0.4368 |
| ENSP00000266743 | SYCP3    | 0.4368 |
| ENSP00000423541 | SV2C     | 0.4368 |
| ENSP00000317331 | SSR4     | 0.4368 |
| ENSP00000244763 | SSR1     | 0.4368 |
| ENSP00000274192 | SRD5A1   | 0.4368 |
| ENSP00000301691 | SOST     | 0.4368 |
| ENSP00000261196 | SLCO1B3  | 0.4368 |
| ENSP00000331938 | SLC9B1P1 | 0.4368 |
| ENSP00000305302 | SLC6A19  | 0.4368 |
| ENSP00000359892 | SLC44A5  | 0.4368 |
| ENSP00000353557 | SLC35F1  | 0.4368 |
| ENSP00000271628 | SF3B4    | 0.4368 |
| ENSP00000303212 | SEMA3E   | 0.4368 |
| ENSP00000382327 | SDR39U1  | 0.4368 |
| ENSP00000244496 | RRP36    | 0.4368 |
| ENSP00000320898 | RNF168   | 0.4368 |
| ENSP00000430955 | RNF145   | 0.4368 |
| ENSP00000358099 | RGS10    | 0.4368 |
| ENSP00000332208 | RFX6     | 0.4368 |
| ENSP00000267229 | RBM26    | 0.4368 |
| ENSP00000291576 | PWP2     | 0.4368 |
| ENSP00000343081 | PUS7L    | 0.4368 |

|                 |            |        |
|-----------------|------------|--------|
| ENSP00000418721 | PURG       | 0.4368 |
| ENSP00000252329 | PSMG3      | 0.4368 |
| ENSP00000284601 | PPP1R3A    | 0.4368 |
| ENSP00000340510 | PPL        | 0.4368 |
| ENSP00000380129 | PIIP5K1    | 0.4368 |
| ENSP00000257694 | PNPLA8     | 0.4368 |
| ENSP00000367747 | PLCH2      | 0.4368 |
| ENSP00000346809 | PGAP1      | 0.4368 |
| ENSP00000288774 | PEX10      | 0.4368 |
| ENSP00000351789 | PELI1      | 0.4368 |
| ENSP00000337405 | PCID2      | 0.4368 |
| ENSP00000261584 | PALB2      | 0.4368 |
| ENSP00000364620 | PADI1      | 0.4368 |
| ENSP00000166534 | P4HA2      | 0.4368 |
| ENSP00000326869 | ORMDL1     | 0.4368 |
| ENSP00000279147 | ORAOV1     | 0.4368 |
| ENSP00000256010 | NTS        | 0.4368 |
| ENSP00000338349 | NRXN3      | 0.4368 |
| ENSP00000357581 | NKX6-2     | 0.4368 |
| ENSP00000372335 | NELFA      | 0.4368 |
| ENSP00000383295 | NBEA       | 0.4368 |
| ENSP00000261745 | NAA25      | 0.4368 |
| ENSP00000258874 | MTHFS      | 0.4368 |
| ENSP00000361014 | MKNK1      | 0.4368 |
| ENSP00000357643 | MKI67      | 0.4368 |
| ENSP00000290130 | MIS18A     | 0.4368 |
| ENSP00000403117 | MFSD1      | 0.4368 |
| ENSP00000333821 | MC2R       | 0.4368 |
| ENSP00000354671 | MAST2      | 0.4368 |
| ENSP00000355877 | MARC1      | 0.4368 |
| ENSP00000306524 | LRRC8E     | 0.4368 |
| ENSP00000332681 | LRP2BP     | 0.4368 |
| ENSP00000369445 | KRTAP10-7  | 0.4368 |
| ENSP00000297625 | KIAA1161   | 0.4368 |
| ENSP00000408405 | KCTD1      | 0.4368 |
| ENSP00000243457 | KCNJ2      | 0.4368 |
| ENSP00000355568 | IRF2BP2    | 0.4368 |
| ENSP00000354519 | INPP5F     | 0.4368 |
| ENSP00000262992 | INPP4B     | 0.4368 |
| ENSP00000369564 | IFNA16     | 0.4368 |
| ENSP00000375736 | HIST3H2BB  | 0.4368 |
| ENSP00000358158 | HIST2H2AA3 | 0.4368 |
| ENSP00000348924 | HIST1H2BE  | 0.4368 |
| ENSP00000367714 | HES5       | 0.4368 |
| ENSP00000233099 | HEATR5B    | 0.4368 |
| ENSP00000251595 | HBA2       | 0.4368 |
| ENSP00000415032 | GTF2H5     | 0.4368 |
| ENSP00000335620 | GSTA1      | 0.4368 |
| ENSP00000293662 | GRASP      | 0.4368 |
| ENSP00000264717 | GCKR       | 0.4368 |
| ENSP00000468977 | FLT3LG     | 0.4368 |
| ENSP00000320309 | FARSA      | 0.4368 |
| ENSP00000384396 | FAM58A     | 0.4368 |



|                 |          |        |
|-----------------|----------|--------|
| ENSP00000334145 | F3       | 0.4368 |
| ENSP00000369677 | EMILIN1  | 0.4368 |
| ENSP00000309175 | EIF1AD   | 0.4368 |
| ENSP00000401566 | ECD      | 0.4368 |
| ENSP00000407323 | EBNA1BP2 | 0.4368 |
| ENSP00000452702 | DUSP13   | 0.4368 |
| ENSP00000311399 | DSCR3    | 0.4368 |
| ENSP00000261383 | DNAH3    | 0.4368 |
| ENSP00000326219 | DHRS4    | 0.4368 |
| ENSP00000337450 | CYP3A7   | 0.4368 |
| ENSP00000222982 | CYP3A5   | 0.4368 |
| ENSP00000325822 | CYP11B2  | 0.4368 |
| ENSP00000006053 | CX3CL1   | 0.4368 |
| ENSP00000319464 | CPN2     | 0.4368 |
| ENSP00000347549 | CPA5     | 0.4368 |
| ENSP00000341640 | COL9A3   | 0.4368 |
| ENSP00000356182 | CNKSR3   | 0.4368 |
| ENSP00000273986 | CISD2    | 0.4368 |
| ENSP00000356579 | CEP350   | 0.4368 |
| ENSP00000416445 | CCDC120  | 0.4368 |
| ENSP00000273145 | CCBP2    | 0.4368 |
| ENSP00000398391 | CC2D2A   | 0.4368 |
| ENSP00000259199 | CBWD2    | 0.4368 |
| ENSP00000364859 | CARD17   | 0.4368 |
| ENSP00000222125 | CAPS     | 0.4368 |
| ENSP00000400882 | CAPNS2   | 0.4368 |
| ENSP00000271971 | CAPN9    | 0.4368 |
| ENSP00000263867 | CAPG     | 0.4368 |
| ENSP00000348300 | BTG4     | 0.4368 |
| ENSP00000261721 | BTBD1    | 0.4368 |
| ENSP00000216807 | BRMS1L   | 0.4368 |
| ENSP00000359371 | BHLHE23  | 0.4368 |
| ENSP00000265471 | B3GAT3   | 0.4368 |
| ENSP00000273859 | ATP10D   | 0.4368 |
| ENSP00000366475 | ATG2A    | 0.4368 |
| ENSP00000345420 | ASCL4    | 0.4368 |
| ENSP00000396747 | ANKRD60  | 0.4368 |
| ENSP00000357112 | AIM2     | 0.4368 |
| ENSP00000317578 | ADRBK2   | 0.4368 |
| ENSP00000315118 | ADCK4    | 0.4368 |
| ENSP00000316674 | ACTL9    | 0.4368 |
| ENSP00000278618 | AASDHPPT | 0.4368 |
| ENSP00000262525 | ZNF629   | 0.4342 |
| ENSP00000309161 | ZNF471   | 0.4342 |
| ENSP00000418210 | ZMYND8   | 0.4342 |
| ENSP00000386764 | ZC3H6    | 0.4342 |
| ENSP00000356792 | XCL1     | 0.4342 |
| ENSP00000386878 | WIPF3    | 0.4342 |
| ENSP00000401435 | VPS53    | 0.4342 |
| ENSP00000343838 | UGT1A10  | 0.4342 |
| ENSP00000348565 | UBA5     | 0.4342 |
| ENSP00000308925 | TLR10    | 0.4342 |
| ENSP00000327323 | THNSL2   | 0.4342 |

|                 |              |        |
|-----------------|--------------|--------|
| ENSP00000411197 | TBC1D9       | 0.4342 |
| ENSP00000266556 | TAPBPL       | 0.4342 |
| ENSP00000334280 | TACC2        | 0.4342 |
| ENSP00000321988 | SULT1A1      | 0.4342 |
| ENSP00000219334 | SMPD3        | 0.4342 |
| ENSP00000307252 | SMOX         | 0.4342 |
| ENSP00000381089 | SLC35E3      | 0.4342 |
| ENSP00000264451 | SLC30A9      | 0.4342 |
| ENSP00000417686 | SLBP         | 0.4342 |
| ENSP00000317817 | SH2D3C       | 0.4342 |
| ENSP00000342850 | SERPINA6     | 0.4342 |
| ENSP00000382767 | SEL1L3       | 0.4342 |
| ENSP00000340463 | S100A14      | 0.4342 |
| ENSP00000322396 | RRS1         | 0.4342 |
| ENSP00000259469 | RPL35        | 0.4342 |
| ENSP00000440272 | RP13-512J5.1 | 0.4342 |
| ENSP00000242719 | RNF11        | 0.4342 |
| ENSP00000339381 | RGS12        | 0.4342 |
| ENSP00000361010 | REXO4        | 0.4342 |
| ENSP00000352668 | RBM12        | 0.4342 |
| ENSP00000345341 | PTGES2       | 0.4342 |
| ENSP00000245457 | PTGER2       | 0.4342 |
| ENSP00000292513 | PTGER1       | 0.4342 |
| ENSP00000367164 | PRR20A       | 0.4342 |
| ENSP00000361009 | PREX1        | 0.4342 |
| ENSP00000397050 | PPM1N        | 0.4342 |
| ENSP00000264775 | PPAP2A       | 0.4342 |
| ENSP00000325296 | PKD2L1       | 0.4342 |
| ENSP00000309542 | PGA5         | 0.4342 |
| ENSP00000282077 | PDK1         | 0.4342 |
| ENSP00000307854 | PCMTD2       | 0.4342 |
| ENSP00000264360 | PCDH10       | 0.4342 |
| ENSP00000343877 | PAQR5        | 0.4342 |
| ENSP00000337946 | PACRG        | 0.4342 |
| ENSP00000363643 | P2RY4        | 0.4342 |
| ENSP00000336764 | OPRL1        | 0.4342 |
| ENSP00000247271 | OMG          | 0.4342 |
| ENSP00000346659 | OCA2         | 0.4342 |
| ENSP00000244766 | NRN1         | 0.4342 |
| ENSP00000233557 | NRBP1        | 0.4342 |
| ENSP00000356958 | NR1I3        | 0.4342 |
| ENSP00000168977 | NMRK2        | 0.4342 |
| ENSP00000260361 | NDUFAF1      | 0.4342 |
| ENSP00000296543 | NAA15        | 0.4342 |
| ENSP00000323047 | MTG1         | 0.4342 |
| ENSP00000355265 | MT-ATP8      | 0.4342 |
| ENSP00000239761 | MRC1         | 0.4342 |
| ENSP00000465894 | MPPE1        | 0.4342 |
| ENSP00000250896 | MKNK2        | 0.4342 |
| ENSP00000317087 | MARCH8       | 0.4342 |
| ENSP00000343706 | MAGEH1       | 0.4342 |
| ENSP00000359301 | MAGEA3       | 0.4342 |
| ENSP00000217246 | MACROD2      | 0.4342 |

|                 |          |        |
|-----------------|----------|--------|
| ENSP00000344470 | LRRC39   | 0.4342 |
| ENSP00000383923 | LIPN     | 0.4342 |
| ENSP00000447488 | LIN7A    | 0.4342 |
| ENSP00000328358 | KRT79    | 0.4342 |
| ENSP00000352064 | KLRC1    | 0.4342 |
| ENSP00000469315 | KLK15    | 0.4342 |
| ENSP00000296343 | KIAA0226 | 0.4342 |
| ENSP00000310568 | KCNK10   | 0.4342 |
| ENSP00000344488 | JPH1     | 0.4342 |
| ENSP00000356468 | IVNS1ABP | 0.4342 |
| ENSP00000254654 | ILKAP    | 0.4342 |
| ENSP00000409000 | IFNL3    | 0.4342 |
| ENSP00000290219 | IFNGR2   | 0.4342 |
| ENSP00000411940 | IFNA17   | 0.4342 |
| ENSP00000277517 | IDI2     | 0.4342 |
| ENSP00000258400 | HTR2B    | 0.4342 |
| ENSP00000466799 | HSD17B1  | 0.4342 |
| ENSP00000355167 | HORMAD1  | 0.4342 |
| ENSP00000357189 | HDGF     | 0.4342 |
| ENSP00000086933 | GSC2     | 0.4342 |
| ENSP00000270257 | GEMIN7   | 0.4342 |
| ENSP00000226798 | FRG1     | 0.4342 |
| ENSP00000260008 | FHDC1    | 0.4342 |
| ENSP00000363036 | FBXW2    | 0.4342 |
| ENSP00000261755 | FAH      | 0.4342 |
| ENSP00000306356 | ENC1     | 0.4342 |
| ENSP00000365643 | DOCK9    | 0.4342 |
| ENSP00000383909 | DMRTA2   | 0.4342 |
| ENSP00000205143 | DLL3     | 0.4342 |
| ENSP00000419005 | DIEXF    | 0.4342 |
| ENSP00000384744 | DERL3    | 0.4342 |
| ENSP00000322524 | DCTPP1   | 0.4342 |
| ENSP00000318867 | CYP8B1   | 0.4342 |
| ENSP00000368079 | CYP4V2   | 0.4342 |
| ENSP00000160373 | CTTNBP2  | 0.4342 |
| ENSP00000359114 | COL11A1  | 0.4342 |
| ENSP00000377914 | CIAPIN1  | 0.4342 |
| ENSP00000385026 | CHRNA2   | 0.4342 |
| ENSP00000373998 | CCDC64B  | 0.4342 |
| ENSP00000222693 | CAV2     | 0.4342 |
| ENSP00000261448 | CASQ2    | 0.4342 |
| ENSP00000301050 | CACNB3   | 0.4342 |
| ENSP00000294360 | C1orf123 | 0.4342 |
| ENSP00000230340 | BYSL     | 0.4342 |
| ENSP00000338862 | BRIX1    | 0.4342 |
| ENSP00000304151 | BOP1     | 0.4342 |
| ENSP00000296424 | BDH2     | 0.4342 |
| ENSP00000419371 | AZI2     | 0.4342 |
| ENSP00000299178 | AVPR1A   | 0.4342 |
| ENSP00000361306 | ATG4A    | 0.4342 |
| ENSP00000343126 | ARID3B   | 0.4342 |
| ENSP00000354610 | AMY2B    | 0.4342 |
| ENSP00000272647 | AMMECR1L | 0.4342 |

|                 |               |        |
|-----------------|---------------|--------|
| ENSP00000357880 | AMD1          | 0.4342 |
| ENSP00000315167 | ALOX12B       | 0.4342 |
| ENSP00000284987 | ADAMTS5       | 0.4342 |
| ENSP00000334300 | ACTL7A        | 0.4342 |
| ENSP00000268129 | ABHD2         | 0.4342 |
| ENSP00000395902 | CCNYL2        | 0.4342 |
| ENSP00000287538 | ZIC3          | 0.4316 |
| ENSP00000220669 | ZFAND1        | 0.4316 |
| ENSP00000225298 | UTP18         | 0.4316 |
| ENSP00000272638 | UBXN4         | 0.4316 |
| ENSP00000346916 | TRIM6-TRIM34  | 0.4316 |
| ENSP00000261180 | TRHDE         | 0.4316 |
| ENSP00000393292 | TOR1AIP1      | 0.4316 |
| ENSP00000310263 | TNFRSF10D     | 0.4316 |
| ENSP00000334962 | TMPRSS6       | 0.4316 |
| ENSP00000283916 | TMPRSS11D     | 0.4316 |
| ENSP00000187762 | TMEM38A       | 0.4316 |
| ENSP00000257262 | TMEM258       | 0.4316 |
| ENSP00000440638 | TMEM216       | 0.4316 |
| ENSP00000304467 | THOP1         | 0.4316 |
| ENSP00000355736 | TCTE3         | 0.4316 |
| ENSP00000339973 | TBC1D28       | 0.4316 |
| ENSP00000455547 | TBC1D24       | 0.4316 |
| ENSP00000403636 | SYNGAP1       | 0.4316 |
| ENSP00000222002 | SULT2A1       | 0.4316 |
| ENSP00000455643 | ST20-MTHFS    | 0.4316 |
| ENSP00000346959 | SLC38A6       | 0.4316 |
| ENSP00000321498 | SLC37A3       | 0.4316 |
| ENSP00000390722 | SLC25A17      | 0.4316 |
| ENSP00000310490 | SLC16A11      | 0.4316 |
| ENSP00000402152 | SLC12A3       | 0.4316 |
| ENSP00000370074 | SERPINB9      | 0.4316 |
| ENSP00000283752 | SERPINB3      | 0.4316 |
| ENSP00000298841 | SERPINA4      | 0.4316 |
| ENSP00000266214 | SCARF2        | 0.4316 |
| ENSP00000425421 | SATL1         | 0.4316 |
| ENSP00000328708 | RXFP3         | 0.4316 |
| ENSP00000339145 | RRP1B         | 0.4316 |
| ENSP00000360031 | RRP12         | 0.4316 |
| ENSP00000414321 | RPS24         | 0.4316 |
| ENSP00000380156 | RPL32         | 0.4316 |
| ENSP00000455952 | RP13-279N23.2 | 0.4316 |
| ENSP00000416453 | RP11-287D1.3  | 0.4316 |
| ENSP00000303554 | PTPN9         | 0.4316 |
| ENSP00000342385 | PTGES         | 0.4316 |
| ENSP00000364697 | PROZ          | 0.4316 |
| ENSP00000392147 | PPP6C         | 0.4316 |
| ENSP00000330190 | POU6F1        | 0.4316 |
| ENSP00000320337 | PLA2G16       | 0.4316 |
| ENSP00000287600 | PDE6D         | 0.4316 |
| ENSP00000380855 | PDCD1LG2      | 0.4316 |
| ENSP00000327557 | PAPL          | 0.4316 |
| ENSP00000302108 | PANK1         | 0.4316 |

|                 |           |        |
|-----------------|-----------|--------|
| ENSP00000315410 | OSBPL3    | 0.4316 |
| ENSP00000242104 | OCM       | 0.4316 |
| ENSP00000387310 | NOTUM     | 0.4316 |
| ENSP00000349145 | MYO16     | 0.4316 |
| ENSP00000324834 | MUC3A     | 0.4316 |
| ENSP00000360365 | MCTS1     | 0.4316 |
| ENSP00000273067 | MARCH4    | 0.4316 |
| ENSP00000348959 | MAN1A2    | 0.4316 |
| ENSP00000035383 | LRRC7     | 0.4316 |
| ENSP00000294507 | LAPTM5    | 0.4316 |
| ENSP00000252250 | KRT6C     | 0.4316 |
| ENSP00000448220 | KRT4      | 0.4316 |
| ENSP00000417303 | KLF8      | 0.4316 |
| ENSP00000334181 | KDM4D     | 0.4316 |
| ENSP00000362328 | KCNK17    | 0.4316 |
| ENSP00000312631 | INSM1     | 0.4316 |
| ENSP00000265967 | HPS5      | 0.4316 |
| ENSP00000358151 | HIST2H2BE | 0.4316 |
| ENSP00000352252 | HIST1H3J  | 0.4316 |
| ENSP00000348706 | HIST1H2BH | 0.4316 |
| ENSP00000252951 | HBZ       | 0.4316 |
| ENSP00000322421 | HBA1      | 0.4316 |
| ENSP00000254810 | H3F3B     | 0.4316 |
| ENSP00000333193 | GJC1      | 0.4316 |
| ENSP00000281950 | GEMIN6    | 0.4316 |
| ENSP00000249598 | GDF2      | 0.4316 |
| ENSP00000265012 | GCNT2     | 0.4316 |
| ENSP00000450281 | GATC      | 0.4316 |
| ENSP00000363317 | FRMPD2    | 0.4316 |
| ENSP00000356723 | FMO4      | 0.4316 |
| ENSP00000376652 | EVL       | 0.4316 |
| ENSP00000429190 | ENDOV     | 0.4316 |
| ENSP00000286523 | ELMSAN1   | 0.4316 |
| ENSP00000360129 | EFCAB7    | 0.4316 |
| ENSP00000307143 | DONSON    | 0.4316 |
| ENSP00000356985 | DEDD      | 0.4316 |
| ENSP00000357103 | DARC      | 0.4316 |
| ENSP00000455329 | CRIP1     | 0.4316 |
| ENSP00000362734 | CRB2      | 0.4316 |
| ENSP00000222482 | CPA4      | 0.4316 |
| ENSP00000292907 | COX7A1    | 0.4316 |
| ENSP00000361616 | COMTD1    | 0.4316 |
| ENSP00000272602 | CNGA3     | 0.4316 |
| ENSP00000336571 | CLDN2     | 0.4316 |
| ENSP00000339867 | CLCN1     | 0.4316 |
| ENSP00000276410 | CHRNA6    | 0.4316 |
| ENSP00000299565 | CHRNA5    | 0.4316 |
| ENSP00000361112 | CHRD1     | 0.4316 |
| ENSP00000353048 | CCT8L2    | 0.4316 |
| ENSP00000221740 | CASP14    | 0.4316 |
| ENSP00000296777 | CARTPT    | 0.4316 |
| ENSP00000375767 | CARD8     | 0.4316 |
| ENSP00000005284 | CACNG3    | 0.4316 |

|                 |                 |        |
|-----------------|-----------------|--------|
| ENSP00000320081 | C3orf58         | 0.4316 |
| ENSP00000261714 | BLMH            | 0.4316 |
| ENSP00000295240 | BBS5            | 0.4316 |
| ENSP00000299575 | ATMIN           | 0.4316 |
| ENSP00000348769 | ARIH2           | 0.4316 |
| ENSP00000350078 | ARID5A          | 0.4316 |
| ENSP00000258530 | APPL2           | 0.4316 |
| ENSP00000321617 | ANKZF1          | 0.4316 |
| ENSP00000251535 | ALOX12          | 0.4316 |
| ENSP00000389289 | AKR1B15         | 0.4316 |
| ENSP00000316109 | AGGF1           | 0.4316 |
| ENSP00000280155 | ADRA2A          | 0.4316 |
| ENSP00000329647 | ACTL10          | 0.4316 |
| ENSP00000377496 | ACD             | 0.4316 |
| ENSP00000450694 | ENSG00000258508 | 0.4316 |
| ENSP00000361499 | YIPF3           | 0.4289 |
| ENSP00000310405 | XCR1            | 0.4289 |
| ENSP00000327716 | WRB             | 0.4289 |
| ENSP00000314193 | WDR75           | 0.4289 |
| ENSP00000351100 | WDR55           | 0.4289 |
| ENSP00000407818 | USP46           | 0.4289 |
| ENSP00000362513 | UGT1A5          | 0.4289 |
| ENSP00000216129 | TTL12           | 0.4289 |
| ENSP00000298355 | TRIM9           | 0.4289 |
| ENSP00000291574 | TRAPPC10        | 0.4289 |
| ENSP00000212355 | TGFBR3          | 0.4289 |
| ENSP00000329256 | TBC1D3F         | 0.4289 |
| ENSP00000339917 | TAF9B           | 0.4289 |
| ENSP00000290607 | STARD9          | 0.4289 |
| ENSP00000314491 | SRRT            | 0.4289 |
| ENSP00000335612 | SPATA21         | 0.4289 |
| ENSP00000347646 | SOX12           | 0.4289 |
| ENSP00000363392 | SNX12           | 0.4289 |
| ENSP00000305974 | SLCO1A2         | 0.4289 |
| ENSP00000434364 | SLC6A5          | 0.4289 |
| ENSP00000295736 | SLC4A7          | 0.4289 |
| ENSP00000219320 | SLC38A7         | 0.4289 |
| ENSP00000327133 | SLC35A4         | 0.4289 |
| ENSP00000352216 | SLC2A10         | 0.4289 |
| ENSP00000377112 | SLC12A8         | 0.4289 |
| ENSP00000264930 | SLC12A7         | 0.4289 |
| ENSP00000342962 | SERINC1         | 0.4289 |
| ENSP00000002829 | SEMA3F          | 0.4289 |
| ENSP00000439918 | RBM7            | 0.4289 |
| ENSP00000356621 | RASAL2          | 0.4289 |
| ENSP00000321271 | PXMP2           | 0.4289 |
| ENSP00000381302 | PPAPDC1A        | 0.4289 |
| ENSP00000373399 | PIP5KL1         | 0.4289 |
| ENSP00000255389 | PEMT            | 0.4289 |
| ENSP00000309142 | PDE12           | 0.4289 |
| ENSP00000368887 | PAK1IP1         | 0.4289 |
| ENSP00000332170 | P4HA3           | 0.4289 |
| ENSP00000396722 | NTM             | 0.4289 |

|                 |           |        |
|-----------------|-----------|--------|
| ENSP00000339377 | NPY5R     | 0.4289 |
| ENSP00000332591 | NPY2R     | 0.4289 |
| ENSP00000337889 | MXD4      | 0.4289 |
| ENSP00000363985 | MTMR8     | 0.4289 |
| ENSP00000250124 | MPDU1     | 0.4289 |
| ENSP00000223054 | MOSPD3    | 0.4289 |
| ENSP00000406674 | MOGAT1    | 0.4289 |
| ENSP00000376827 | MKS1      | 0.4289 |
| ENSP00000309790 | MIS18BP1  | 0.4289 |
| ENSP00000371607 | MIPEP     | 0.4289 |
| ENSP00000385527 | MFSD2B    | 0.4289 |
| ENSP00000323264 | MARVELD2  | 0.4289 |
| ENSP00000353655 | MAN2A2    | 0.4289 |
| ENSP00000387928 | MAGIX     | 0.4289 |
| ENSP00000386043 | LTBP1     | 0.4289 |
| ENSP00000353538 | LRRCC1    | 0.4289 |
| ENSP00000304923 | LRRC28    | 0.4289 |
| ENSP00000221459 | LIN7B     | 0.4289 |
| ENSP00000378856 | LGALS9    | 0.4289 |
| ENSP00000416696 | KIAA1432  | 0.4289 |
| ENSP00000360626 | KCNG1     | 0.4289 |
| ENSP00000362071 | JPH2      | 0.4289 |
| ENSP00000382204 | JMJD1C    | 0.4289 |
| ENSP00000263370 | ITPKC     | 0.4289 |
| ENSP00000262457 | INVS      | 0.4289 |
| ENSP00000434466 | INTS4     | 0.4289 |
| ENSP00000369553 | IFNA8     | 0.4289 |
| ENSP00000342560 | HRH3      | 0.4289 |
| ENSP00000439493 | HIST1H3C  | 0.4289 |
| ENSP00000349873 | HIST1H2AL | 0.4289 |
| ENSP00000302276 | HEXIM2    | 0.4289 |
| ENSP00000350378 | GOLGA7    | 0.4289 |
| ENSP00000262366 | GLIS2     | 0.4289 |
| ENSP00000359490 | GBP4      | 0.4289 |
| ENSP00000269373 | FN3KRP    | 0.4289 |
| ENSP00000357429 | FABP7     | 0.4289 |
| ENSP00000364035 | FAAH2     | 0.4289 |
| ENSP00000326267 | EFCAB11   | 0.4289 |
| ENSP00000370022 | EBF4      | 0.4289 |
| ENSP00000222219 | DNASE2    | 0.4289 |
| ENSP00000344674 | DHRS2     | 0.4289 |
| ENSP00000219481 | DECR2     | 0.4289 |
| ENSP00000361232 | DDX31     | 0.4289 |
| ENSP00000351147 | DCAF4     | 0.4289 |
| ENSP00000337439 | DACT1     | 0.4289 |
| ENSP00000360372 | CYP2C19   | 0.4289 |
| ENSP00000301146 | CYP2A7    | 0.4289 |
| ENSP00000216416 | CNIH      | 0.4289 |
| ENSP00000328674 | CLDN6     | 0.4289 |
| ENSP00000428780 | CLDN23    | 0.4289 |
| ENSP00000299736 | CENPV     | 0.4289 |
| ENSP00000436318 | CCS       | 0.4289 |
| ENSP00000342344 | CCNYL1    | 0.4289 |

|                 |            |        |
|-----------------|------------|--------|
| ENSP00000225842 | CCL1       | 0.4289 |
| ENSP00000318429 | CCDC114    | 0.4289 |
| ENSP00000303092 | CACNG5     | 0.4289 |
| ENSP00000365522 | C9orf64    | 0.4289 |
| ENSP00000286122 | BANP       | 0.4289 |
| ENSP00000369141 | APTX       | 0.4289 |
| ENSP00000371347 | ANGPT4     | 0.4289 |
| ENSP00000316590 | AL445665.1 | 0.4289 |
| ENSP00000363208 | AGAP7      | 0.4289 |
| ENSP00000238855 | AFTPH      | 0.4289 |
| ENSP00000312250 | ADPGK      | 0.4289 |
| ENSP00000255082 | ACY3       | 0.4289 |
| ENSP00000273596 | ABHD14A    | 0.4289 |
| ENSP00000217130 | ZNF512B    | 0.4263 |
| ENSP00000378165 | ZNF207     | 0.4263 |
| ENSP00000308759 | ZBTB21     | 0.4263 |
| ENSP00000354822 | XAF1       | 0.4263 |
| ENSP00000340526 | UTS2B      | 0.4263 |
| ENSP00000254803 | UTP3       | 0.4263 |
| ENSP00000343526 | USP1       | 0.4263 |
| ENSP00000337040 | UNC119     | 0.4263 |
| ENSP00000366434 | UIMC1      | 0.4263 |
| ENSP00000387888 | UGT2A2     | 0.4263 |
| ENSP00000303174 | UGT1A6     | 0.4263 |
| ENSP00000365938 | UGGT2      | 0.4263 |
| ENSP00000203001 | TRMT6      | 0.4263 |
| ENSP00000432743 | TP53AIP1   | 0.4263 |
| ENSP00000320236 | TIMM22     | 0.4263 |
| ENSP00000247881 | TAS2R4     | 0.4263 |
| ENSP00000269142 | TAF4B      | 0.4263 |
| ENSP00000327072 | TAF1A      | 0.4263 |
| ENSP00000344041 | SYNGR4     | 0.4263 |
| ENSP00000371388 | SRXN1      | 0.4263 |
| ENSP00000346298 | SLC6A20    | 0.4263 |
| ENSP00000339260 | SLC6A13    | 0.4263 |
| ENSP00000393557 | SLC4A4     | 0.4263 |
| ENSP00000260649 | SLC3A1     | 0.4263 |
| ENSP00000358565 | SLC35A1    | 0.4263 |
| ENSP00000379836 | SLC30A5    | 0.4263 |
| ENSP00000005587 | SKAP2      | 0.4263 |
| ENSP00000343445 | SERPINB4   | 0.4263 |
| ENSP00000324857 | SEMA6D     | 0.4263 |
| ENSP00000369380 | SCML1      | 0.4263 |
| ENSP00000370394 | RUFY3      | 0.4263 |
| ENSP00000460871 | RSL1D1     | 0.4263 |
| ENSP00000328340 | RNF135     | 0.4263 |
| ENSP00000369162 | RIOK1      | 0.4263 |
| ENSP00000360455 | RHOXF2B    | 0.4263 |
| ENSP00000264400 | RASGEF1B   | 0.4263 |
| ENSP00000262305 | RAB11FIP3  | 0.4263 |
| ENSP00000419503 | PTPLAD2    | 0.4263 |
| ENSP00000261875 | PTPLAD1    | 0.4263 |
| ENSP00000258324 | PIGC       | 0.4263 |



|                 |         |        |
|-----------------|---------|--------|
| ENSP00000362116 | PGC     | 0.4263 |
| ENSP00000225873 | PEX12   | 0.4263 |
| ENSP00000254908 | PCBD2   | 0.4263 |
| ENSP00000325618 | PARP10  | 0.4263 |
| ENSP00000316649 | OSBPL2  | 0.4263 |
| ENSP00000305288 | NLGN2   | 0.4263 |
| ENSP00000396538 | NFAT5   | 0.4263 |
| ENSP00000416341 | NELL2   | 0.4263 |
| ENSP00000281871 | MZT2B   | 0.4263 |
| ENSP00000367049 | MZT1    | 0.4263 |
| ENSP00000462945 | MSL1    | 0.4263 |
| ENSP00000365005 | MAP3K19 | 0.4263 |
| ENSP00000215637 | MADCAM1 | 0.4263 |
| ENSP00000369251 | MAB21L1 | 0.4263 |
| ENSP00000309463 | LIPT2   | 0.4263 |
| ENSP00000383901 | LIPM    | 0.4263 |
| ENSP00000305653 | LETM1   | 0.4263 |
| ENSP00000252252 | KRT6B   | 0.4263 |
| ENSP00000263372 | KCNK6   | 0.4263 |
| ENSP00000240662 | KCNJ8   | 0.4263 |
| ENSP00000333496 | KCND2   | 0.4263 |
| ENSP00000357753 | IVL     | 0.4263 |
| ENSP00000379712 | IQSEC2  | 0.4263 |
| ENSP00000381064 | INTS10  | 0.4263 |
| ENSP00000358963 | HTR1B   | 0.4263 |
| ENSP00000392896 | HSBP1   | 0.4263 |
| ENSP00000326649 | HPS1    | 0.4263 |
| ENSP00000247815 | HELB    | 0.4263 |
| ENSP00000437968 | HEATR5A | 0.4263 |
| ENSP00000199708 | HBQ1    | 0.4263 |
| ENSP00000384597 | GTF2A1L | 0.4263 |
| ENSP00000263269 | GRIN2D  | 0.4263 |
| ENSP00000297469 | GPER    | 0.4263 |
| ENSP00000351552 | GATAD2A | 0.4263 |
| ENSP00000313309 | FUZ     | 0.4263 |
| ENSP00000368207 | FTHL17  | 0.4263 |
| ENSP00000357682 | FANK1   | 0.4263 |
| ENSP00000217429 | FAM83D  | 0.4263 |
| ENSP00000335808 | FAM192A | 0.4263 |
| ENSP00000263062 | EPC1    | 0.4263 |
| ENSP00000265800 | EPB49   | 0.4263 |
| ENSP00000333917 | DUSP18  | 0.4263 |
| ENSP00000340609 | DUPD1   | 0.4263 |
| ENSP00000257189 | DSG3    | 0.4263 |
| ENSP00000322181 | DPM2    | 0.4263 |
| ENSP00000316240 | DNAJC14 | 0.4263 |
| ENSP00000365397 | DHRS3   | 0.4263 |
| ENSP00000366237 | DFFA    | 0.4263 |
| ENSP00000258772 | DDX56   | 0.4263 |
| ENSP00000269703 | CYP4F22 | 0.4263 |
| ENSP00000222382 | CYP3A43 | 0.4263 |
| ENSP00000001146 | CYP26B1 | 0.4263 |
| ENSP00000342007 | CYP1A2  | 0.4263 |

|                 |               |        |
|-----------------|---------------|--------|
| ENSP00000297135 | COG5          | 0.4263 |
| ENSP00000418741 | CNTNAP4       | 0.4263 |
| ENSP00000297668 | CNTNAP3       | 0.4263 |
| ENSP00000261514 | CLCN3         | 0.4263 |
| ENSP00000261751 | CHRN4         | 0.4263 |
| ENSP00000357461 | CHRN2         | 0.4263 |
| ENSP00000300113 | CHP2          | 0.4263 |
| ENSP00000403649 | CGB8          | 0.4263 |
| ENSP00000317842 | CES2          | 0.4263 |
| ENSP00000290122 | CELA3A        | 0.4263 |
| ENSP00000365075 | CELA2B        | 0.4263 |
| ENSP00000371278 | CDC37L1       | 0.4263 |
| ENSP00000384040 | CCDC85A       | 0.4263 |
| ENSP00000364464 | C9orf3        | 0.4263 |
| ENSP00000356311 | C1orf106      | 0.4263 |
| ENSP00000297161 | BMPER         | 0.4263 |
| ENSP00000307713 | BDKRB2        | 0.4263 |
| ENSP00000435210 | BCLAF1        | 0.4263 |
| ENSP00000283684 | ATP8B1        | 0.4263 |
| ENSP00000304891 | ATP6V1E2      | 0.4263 |
| ENSP00000417914 | ASB11         | 0.4263 |
| ENSP00000368189 | ARID3C        | 0.4263 |
| ENSP00000372654 | AQP4          | 0.4263 |
| ENSP00000227667 | APOC3         | 0.4263 |
| ENSP00000409722 | AL592183.1    | 0.4263 |
| ENSP00000364217 | AGER          | 0.4263 |
| ENSP00000415452 | AGAP8         | 0.4263 |
| ENSP00000363207 | AGAP5         | 0.4263 |
| ENSP00000341785 | ADIPOR1       | 0.4263 |
| ENSP00000282641 | A1CF          | 0.4263 |
| ENSP00000378286 | ZBTB3         | 0.4237 |
| ENSP00000326200 | ZBTB11        | 0.4237 |
| ENSP00000282344 | USP12         | 0.4237 |
| ENSP00000252597 | USHBP1        | 0.4237 |
| ENSP00000346768 | UGT1A9        | 0.4237 |
| ENSP00000418532 | UGT1A3        | 0.4237 |
| ENSP00000351206 | TXLNB         | 0.4237 |
| ENSP00000299866 | TVP23A        | 0.4237 |
| ENSP00000284995 | TSEN2         | 0.4237 |
| ENSP00000356411 | TROVE2        | 0.4237 |
| ENSP00000302120 | TRIM8         | 0.4237 |
| ENSP00000305161 | TRIM56        | 0.4237 |
| ENSP00000371693 | TNFRSF19      | 0.4237 |
| ENSP00000402698 | TMEM30C       | 0.4237 |
| ENSP00000380747 | TMEM209       | 0.4237 |
| ENSP00000261296 | TGDS          | 0.4237 |
| ENSP00000295201 | TEKT4         | 0.4237 |
| ENSP00000264037 | TECTA         | 0.4237 |
| ENSP00000410111 | TBC1D26       | 0.4237 |
| ENSP00000350162 | SYCP2         | 0.4237 |
| ENSP00000311493 | STON1-GTF2A1L | 0.4237 |
| ENSP00000428756 | STAU2         | 0.4237 |
| ENSP00000350198 | SSTR2         | 0.4237 |

|                 |               |        |
|-----------------|---------------|--------|
| ENSP00000364430 | SP5           | 0.4237 |
| ENSP00000216294 | SNAPC1        | 0.4237 |
| ENSP00000247225 | SGPP1         | 0.4237 |
| ENSP00000308339 | SEC16B        | 0.4237 |
| ENSP00000256190 | SBF2          | 0.4237 |
| ENSP00000461728 | RP11-212D19.4 | 0.4237 |
| ENSP00000257700 | RINT1         | 0.4237 |
| ENSP00000465742 | RASGRP4       | 0.4237 |
| ENSP00000363350 | PTPN20B       | 0.4237 |
| ENSP00000222381 | PON1          | 0.4237 |
| ENSP00000318914 | PNMA1         | 0.4237 |
| ENSP00000291009 | PIP           | 0.4237 |
| ENSP00000217446 | PIGU          | 0.4237 |
| ENSP00000387966 | PGBD3         | 0.4237 |
| ENSP00000357547 | NUP210L       | 0.4237 |
| ENSP00000265459 | NRXN2         | 0.4237 |
| ENSP00000348395 | NPEPL1        | 0.4237 |
| ENSP00000373518 | NOX5          | 0.4237 |
| ENSP00000268802 | NOB1          | 0.4237 |
| ENSP00000337452 | NIPA1         | 0.4237 |
| ENSP00000353375 | MAP4          | 0.4237 |
| ENSP00000387077 | LYPD6B        | 0.4237 |
| ENSP00000329932 | LGALS9C       | 0.4237 |
| ENSP00000382021 | LCMT1         | 0.4237 |
| ENSP00000256644 | LAMTOR5       | 0.4237 |
| ENSP00000438526 | KLHL35        | 0.4237 |
| ENSP00000368813 | KLHL34        | 0.4237 |
| ENSP00000221200 | KCTD9         | 0.4237 |
| ENSP00000371985 | KCNA1         | 0.4237 |
| ENSP00000218436 | ITIH6         | 0.4237 |
| ENSP00000254801 | IGJ           | 0.4237 |
| ENSP00000379908 | ICA1          | 0.4237 |
| ENSP00000338457 | HPS4          | 0.4237 |
| ENSP00000012134 | HIVEP2        | 0.4237 |
| ENSP00000330307 | HIST1H2AK     | 0.4237 |
| ENSP00000238379 | HDHD3         | 0.4237 |
| ENSP00000204726 | GOLGA3        | 0.4237 |
| ENSP00000246802 | GLTSCR2       | 0.4237 |
| ENSP00000396615 | GLB1L3        | 0.4237 |
| ENSP00000340811 | GJB5          | 0.4237 |
| ENSP00000365920 | GCNT1         | 0.4237 |
| ENSP00000351631 | FAM76B        | 0.4237 |
| ENSP00000267750 | EMC4          | 0.4237 |
| ENSP00000318147 | EDEM3         | 0.4237 |
| ENSP00000366672 | DTD1          | 0.4237 |
| ENSP00000343665 | DOC2B         | 0.4237 |
| ENSP00000222122 | DBP           | 0.4237 |
| ENSP00000470318 | CTD-3148I10.9 | 0.4237 |
| ENSP00000297405 | CSMD3         | 0.4237 |
| ENSP00000364691 | CROCC         | 0.4237 |
| ENSP00000454500 | COG8          | 0.4237 |
| ENSP00000420443 | CNIH4         | 0.4237 |
| ENSP00000311733 | CMKLR1        | 0.4237 |

|                 |              |        |
|-----------------|--------------|--------|
| ENSP00000298912 | CLMN         | 0.4237 |
| ENSP00000374145 | CHRNG        | 0.4237 |
| ENSP00000352841 | CEP57L1      | 0.4237 |
| ENSP00000332504 | CCR10        | 0.4237 |
| ENSP00000390423 | CATSPER4     | 0.4237 |
| ENSP00000222212 | CACNG7       | 0.4237 |
| ENSP00000282059 | C18orf25     | 0.4237 |
| ENSP00000333769 | BSG          | 0.4237 |
| ENSP00000335201 | BCDIN3D      | 0.4237 |
| ENSP00000297512 | ASIC3        | 0.4237 |
| ENSP00000369855 | ASB9         | 0.4237 |
| ENSP00000273258 | ARL6IP5      | 0.4237 |
| ENSP00000315136 | APBA3        | 0.4237 |
| ENSP00000360762 | ANKRD1       | 0.4237 |
| ENSP00000333813 | ALG12        | 0.4237 |
| ENSP00000266483 | ALG10        | 0.4237 |
| ENSP00000277491 | AL354898.1   | 0.4237 |
| ENSP00000347581 | AGK          | 0.4237 |
| ENSP00000306662 | ADRA1B       | 0.4237 |
| ENSP00000348912 | ADAM33       | 0.4237 |
| ENSP00000243903 | ACTR5        | 0.4237 |
| ENSP00000333926 | ABCC5        | 0.4237 |
| ENSP00000262095 | ONECUT2      | 0.4237 |
| ENSP00000299218 | CAND1        | 0.4237 |
| ENSP00000359837 | ZZZ3         | 0.4211 |
| ENSP00000363384 | ZNF593       | 0.4211 |
| ENSP00000313582 | ZNF436       | 0.4211 |
| ENSP00000363257 | ZDHHC18      | 0.4211 |
| ENSP00000347999 | ZC3H7A       | 0.4211 |
| ENSP00000349503 | ZBTB14       | 0.4211 |
| ENSP00000339245 | YTHDC1       | 0.4211 |
| ENSP00000261381 | XYLT1        | 0.4211 |
| ENSP00000356793 | XCL2         | 0.4211 |
| ENSP00000258499 | USP44        | 0.4211 |
| ENSP00000362525 | UGT1A7       | 0.4211 |
| ENSP00000456827 | UBE2F        | 0.4211 |
| ENSP00000429865 | TVP23C-CDRT4 | 0.4211 |
| ENSP00000321346 | TTL11        | 0.4211 |
| ENSP00000301021 | TRAPPC2L     | 0.4211 |
| ENSP00000358765 | TPBG         | 0.4211 |
| ENSP00000386239 | TONSL        | 0.4211 |
| ENSP00000272771 | TMEFF2       | 0.4211 |
| ENSP00000462799 | TBC1D29      | 0.4211 |
| ENSP00000332592 | SPAG16       | 0.4211 |
| ENSP00000271227 | SLC44A3      | 0.4211 |
| ENSP00000337561 | SLC43A3      | 0.4211 |
| ENSP00000256689 | SLC38A2      | 0.4211 |
| ENSP00000317382 | SLC36A4      | 0.4211 |
| ENSP00000368648 | SLC30A6      | 0.4211 |
| ENSP00000350024 | SLC29A2      | 0.4211 |
| ENSP00000367102 | SLC22A6      | 0.4211 |
| ENSP00000301891 | SLC22A11     | 0.4211 |
| ENSP00000263160 | SLC17A6      | 0.4211 |

|                 |            |        |
|-----------------|------------|--------|
| ENSP00000406220 | SLC13A5    | 0.4211 |
| ENSP00000393762 | SESN1      | 0.4211 |
| ENSP00000329374 | SERPINA7   | 0.4211 |
| ENSP00000394791 | SENP1      | 0.4211 |
| ENSP00000297029 | SCIN       | 0.4211 |
| ENSP00000328472 | S1PR5      | 0.4211 |
| ENSP00000357711 | S100A7     | 0.4211 |
| ENSP00000216036 | RTDR1      | 0.4211 |
| ENSP00000355927 | RPS6KC1    | 0.4211 |
| ENSP00000333948 | RPS19BP1   | 0.4211 |
| ENSP00000427123 | RAI14      | 0.4211 |
| ENSP00000274710 | PSD2       | 0.4211 |
| ENSP00000291281 | PRKD2      | 0.4211 |
| ENSP00000254101 | PRKAB2     | 0.4211 |
| ENSP00000384725 | PRDM6      | 0.4211 |
| ENSP00000349124 | PPP4R2     | 0.4211 |
| ENSP00000308318 | PPP1R3B    | 0.4211 |
| ENSP00000265322 | PECR       | 0.4211 |
| ENSP00000291565 | PDXK       | 0.4211 |
| ENSP00000332576 | OSBP2      | 0.4211 |
| ENSP00000332823 | NR2C2AP    | 0.4211 |
| ENSP00000365651 | NPPB       | 0.4211 |
| ENSP00000320324 | NPEPPS     | 0.4211 |
| ENSP00000215057 | MZF1       | 0.4211 |
| ENSP00000351790 | MYPN       | 0.4211 |
| ENSP00000287025 | MTERFD1    | 0.4211 |
| ENSP00000248643 | MTERF      | 0.4211 |
| ENSP00000290208 | MRPL10     | 0.4211 |
| ENSP00000219431 | MPG        | 0.4211 |
| ENSP00000344242 | LRRC17     | 0.4211 |
| ENSP00000317619 | LACC1      | 0.4211 |
| ENSP00000356123 | KLHDC8A    | 0.4211 |
| ENSP00000368881 | KIN        | 0.4211 |
| ENSP00000159111 | KDM4B      | 0.4211 |
| ENSP00000271915 | KCNN3      | 0.4211 |
| ENSP00000264661 | KCNH4      | 0.4211 |
| ENSP00000319591 | KCND3      | 0.4211 |
| ENSP00000315662 | IQSEC3     | 0.4211 |
| ENSP00000361502 | HYI        | 0.4211 |
| ENSP00000351035 | HSD17B11   | 0.4211 |
| ENSP00000271588 | HMCN1      | 0.4211 |
| ENSP00000353581 | HIST1H3E   | 0.4211 |
| ENSP00000307705 | HIST1H1E   | 0.4211 |
| ENSP00000327431 | HBG1       | 0.4211 |
| ENSP00000292896 | HBE1       | 0.4211 |
| ENSP00000352047 | GULP1      | 0.4211 |
| ENSP00000253458 | GSE1       | 0.4211 |
| ENSP00000313756 | GPR75-ASB3 | 0.4211 |
| ENSP00000272644 | GPR17      | 0.4211 |
| ENSP00000308535 | GOLT1A     | 0.4211 |
| ENSP00000335074 | GHRL       | 0.4211 |
| ENSP00000238018 | GDA        | 0.4211 |
| ENSP00000269856 | FEM1A      | 0.4211 |

|                 |              |        |
|-----------------|--------------|--------|
| ENSP00000355157 | FCRL2        | 0.4211 |
| ENSP00000361592 | ERMAP        | 0.4211 |
| ENSP00000323246 | E2F7         | 0.4211 |
| ENSP00000195654 | DOPEY1       | 0.4211 |
| ENSP00000302843 | DNAJC18      | 0.4211 |
| ENSP00000269945 | DMRTC2       | 0.4211 |
| ENSP00000417706 | DCUN1D2      | 0.4211 |
| ENSP00000360991 | CYP4B1       | 0.4211 |
| ENSP00000333212 | CYP2U1       | 0.4211 |
| ENSP00000408860 | CYP21A2      | 0.4211 |
| ENSP00000293230 | CYGB         | 0.4211 |
| ENSP00000271277 | CTTNBP2NL    | 0.4211 |
| ENSP00000246891 | CSN1S1       | 0.4211 |
| ENSP00000251102 | CNGB1        | 0.4211 |
| ENSP00000370213 | CLCN4        | 0.4211 |
| ENSP00000290583 | CELF3        | 0.4211 |
| ENSP00000383986 | CDCA7L       | 0.4211 |
| ENSP00000357012 | CD244        | 0.4211 |
| ENSP00000324101 | CD151        | 0.4211 |
| ENSP00000369853 | C2CD2        | 0.4211 |
| ENSP00000223122 | C1GALT1      | 0.4211 |
| ENSP00000261700 | C14orf166    | 0.4211 |
| ENSP00000254900 | BRD8         | 0.4211 |
| ENSP00000242067 | BBS9         | 0.4211 |
| ENSP00000400168 | ATP5J2-PTCD1 | 0.4211 |
| ENSP00000306678 | ANKK1        | 0.4211 |
| ENSP00000367631 | ANKEF1       | 0.4211 |
| ENSP00000392513 | AGAP4        | 0.4211 |
| ENSP00000360997 | ADAMTS13     | 0.4211 |
| ENSP00000361608 | ABCC10       | 0.4211 |
| ENSP00000430633 | 61E3.4       | 0.4211 |
| ENSP00000253115 | ZNF426       | 0.4184 |
| ENSP00000290974 | ZFYVE28      | 0.4184 |
| ENSP00000304985 | ZFX          | 0.4184 |
| ENSP00000300101 | ZBTB39       | 0.4184 |
| ENSP00000262178 | VIPR2        | 0.4184 |
| ENSP00000333329 | USP17L2      | 0.4184 |
| ENSP00000332737 | UNC5A        | 0.4184 |
| ENSP00000305221 | UGT2B4       | 0.4184 |
| ENSP00000382507 | UBXN2B       | 0.4184 |
| ENSP00000312356 | TRMT10C      | 0.4184 |
| ENSP00000373272 | TRIM71       | 0.4184 |
| ENSP00000361162 | TOE1         | 0.4184 |
| ENSP00000307519 | TMPRSS11E    | 0.4184 |
| ENSP00000222284 | TMEM147      | 0.4184 |
| ENSP00000384376 | TDRD15       | 0.4184 |
| ENSP00000263346 | TCF25        | 0.4184 |
| ENSP00000334308 | SYNE3        | 0.4184 |
| ENSP00000336750 | SUPT7L       | 0.4184 |
| ENSP00000263997 | SLC7A6OS     | 0.4184 |
| ENSP00000395653 | SLC46A1      | 0.4184 |
| ENSP00000360966 | SLC2A6       | 0.4184 |
| ENSP00000259608 | SIT1         | 0.4184 |

|                 |               |        |
|-----------------|---------------|--------|
| ENSP00000309186 | SH3RF3        | 0.4184 |
| ENSP00000331368 | SERPINB8      | 0.4184 |
| ENSP00000307607 | SDR16C5       | 0.4184 |
| ENSP00000396915 | SCN1B         | 0.4184 |
| ENSP00000449223 | RP11-347C12.3 | 0.4184 |
| ENSP00000355523 | RGS7          | 0.4184 |
| ENSP00000360519 | RBP4          | 0.4184 |
| ENSP00000331211 | RBM43         | 0.4184 |
| ENSP00000223073 | RBM28         | 0.4184 |
| ENSP00000261741 | RBM19         | 0.4184 |
| ENSP00000330276 | PTPN21        | 0.4184 |
| ENSP00000263681 | POLD3         | 0.4184 |
| ENSP00000364249 | PLA2G5        | 0.4184 |
| ENSP00000294338 | PDZK1IP1      | 0.4184 |
| ENSP00000328992 | PAXBP1        | 0.4184 |
| ENSP00000328088 | PAWR          | 0.4184 |
| ENSP00000309771 | P2RY6         | 0.4184 |
| ENSP00000376921 | NTNG2         | 0.4184 |
| ENSP00000355077 | NSMCE1        | 0.4184 |
| ENSP00000269228 | NPC1          | 0.4184 |
| ENSP00000380109 | NFKBID        | 0.4184 |
| ENSP00000355955 | NENF          | 0.4184 |
| ENSP00000446132 | NAV3          | 0.4184 |
| ENSP00000403683 | NABP1         | 0.4184 |
| ENSP00000401867 | MXD3          | 0.4184 |
| ENSP00000423600 | MTX3          | 0.4184 |
| ENSP00000328118 | MCF2L2        | 0.4184 |
| ENSP00000304198 | MBD3L1        | 0.4184 |
| ENSP00000274140 | MARCH6        | 0.4184 |
| ENSP00000389128 | LRRC15        | 0.4184 |
| ENSP00000349629 | LRBA          | 0.4184 |
| ENSP00000325929 | LNX2          | 0.4184 |
| ENSP00000347088 | LARGE         | 0.4184 |
| ENSP00000265598 | LAMP3         | 0.4184 |
| ENSP00000257951 | KRT84         | 0.4184 |
| ENSP00000427900 | KIF13B        | 0.4184 |
| ENSP00000262916 | KCNQ4         | 0.4184 |
| ENSP00000378033 | KCNK4         | 0.4184 |
| ENSP00000368982 | KATNB1        | 0.4184 |
| ENSP00000295980 | IL17RE        | 0.4184 |
| ENSP00000412897 | IFNA4         | 0.4184 |
| ENSP00000369566 | IFNA10        | 0.4184 |
| ENSP00000395590 | IFI35         | 0.4184 |
| ENSP00000322924 | HTR1F         | 0.4184 |
| ENSP00000263278 | HSD17B14      | 0.4184 |
| ENSP00000299238 | HPS6          | 0.4184 |
| ENSP00000264720 | GTF3C2        | 0.4184 |
| ENSP00000265963 | GTF2H1        | 0.4184 |
| ENSP00000282020 | GRID2         | 0.4184 |
| ENSP00000290374 | GJD2          | 0.4184 |
| ENSP00000335592 | GABRA5        | 0.4184 |
| ENSP00000331411 | FBLN7         | 0.4184 |
| ENSP00000347744 | FAM49A        | 0.4184 |

|                 |          |        |
|-----------------|----------|--------|
| ENSP00000298937 | ELP4     | 0.4184 |
| ENSP00000312671 | EHBP1L1  | 0.4184 |
| ENSP00000403932 | EFCAB3   | 0.4184 |
| ENSP00000344235 | DUSP28   | 0.4184 |
| ENSP00000276202 | DOCK11   | 0.4184 |
| ENSP00000314910 | DKK3     | 0.4184 |
| ENSP00000268854 | DDX52    | 0.4184 |
| ENSP00000282957 | CPB1     | 0.4184 |
| ENSP00000366248 | CORT     | 0.4184 |
| ENSP00000286809 | CLDN8    | 0.4184 |
| ENSP00000243776 | CHPF     | 0.4184 |
| ENSP00000292672 | CELF5    | 0.4184 |
| ENSP00000345133 | CDC42BPG | 0.4184 |
| ENSP00000354416 | CCL28    | 0.4184 |
| ENSP00000364858 | CARD16   | 0.4184 |
| ENSP00000248420 | CACTIN   | 0.4184 |
| ENSP00000263413 | C6       | 0.4184 |
| ENSP00000363642 | BMS1     | 0.4184 |
| ENSP00000263368 | BLVRB    | 0.4184 |
| ENSP00000344087 | AUTS2    | 0.4184 |
| ENSP00000277458 | ASB6     | 0.4184 |
| ENSP00000371152 | ASAH1    | 0.4184 |
| ENSP00000433427 | ARL15    | 0.4184 |
| ENSP00000297562 | AP5Z1    | 0.4184 |
| ENSP00000353518 | ANKS1A   | 0.4184 |
| ENSP00000369927 | AKR1C3   | 0.4184 |
| ENSP00000365227 | AIF1     | 0.4184 |
| ENSP00000363168 | AGAP6    | 0.4184 |
| ENSP00000386069 | ADRA2C   | 0.4184 |
| ENSP00000349616 | ADIPOR2  | 0.4184 |
| ENSP00000356567 | ACBD6    | 0.4184 |
| ENSP00000303252 | ZNF804A  | 0.4158 |
| ENSP00000334394 | ZNF677   | 0.4158 |
| ENSP00000337008 | ZNF644   | 0.4158 |
| ENSP00000337313 | ZCCHC8   | 0.4158 |
| ENSP00000406955 | ZBTB38   | 0.4158 |
| ENSP00000351539 | ZBTB18   | 0.4158 |
| ENSP00000309031 | VCP1P1   | 0.4158 |
| ENSP00000303434 | USP38    | 0.4158 |
| ENSP00000307701 | TSPAN5   | 0.4158 |
| ENSP00000299427 | TPP1     | 0.4158 |
| ENSP00000312599 | TMEM70   | 0.4158 |
| ENSP00000346065 | TDRD6    | 0.4158 |
| ENSP00000421655 | TCOF1    | 0.4158 |
| ENSP00000358677 | TBX18    | 0.4158 |
| ENSP00000321826 | STXBP5   | 0.4158 |
| ENSP00000270061 | SSBP4    | 0.4158 |
| ENSP00000288680 | SPPL3    | 0.4158 |
| ENSP00000386531 | SMPD4    | 0.4158 |
| ENSP00000294008 | SLX4     | 0.4158 |
| ENSP00000219343 | SLC7A6   | 0.4158 |
| ENSP00000266682 | SLC6A15  | 0.4158 |
| ENSP00000393571 | SLC35F2  | 0.4158 |



|                 |          |        |
|-----------------|----------|--------|
| ENSP00000359526 | SLC25A28 | 0.4158 |
| ENSP00000355930 | SLC22A1  | 0.4158 |
| ENSP00000360549 | SLC1A7   | 0.4158 |
| ENSP00000395983 | SLC12A4  | 0.4158 |
| ENSP00000394049 | SLA      | 0.4158 |
| ENSP00000341141 | SIGLEC1  | 0.4158 |
| ENSP00000271375 | SFT2D2   | 0.4158 |
| ENSP00000354590 | SFT2D1   | 0.4158 |
| ENSP00000377655 | SENP7    | 0.4158 |
| ENSP00000345512 | SEMA6A   | 0.4158 |
| ENSP00000278947 | SCN2B    | 0.4158 |
| ENSP00000304133 | SCG2     | 0.4158 |
| ENSP00000346037 | RPLP1    | 0.4158 |
| ENSP00000371923 | RP1L1    | 0.4158 |
| ENSP00000329454 | RCAN2    | 0.4158 |
| ENSP00000379051 | PURB     | 0.4158 |
| ENSP00000373153 | PTPLB    | 0.4158 |
| ENSP00000341914 | PTCHD4   | 0.4158 |
| ENSP00000216968 | PROCR    | 0.4158 |
| ENSP00000261308 | PPWD1    | 0.4158 |
| ENSP00000414202 | PPP6R1   | 0.4158 |
| ENSP00000257622 | POM121   | 0.4158 |
| ENSP00000283426 | PLEKHG4B | 0.4158 |
| ENSP00000389275 | PKD1P1   | 0.4158 |
| ENSP00000317721 | PIPOX    | 0.4158 |
| ENSP00000352185 | PHF2     | 0.4158 |
| ENSP00000295030 | PEX13    | 0.4158 |
| ENSP00000221480 | PEX11G   | 0.4158 |
| ENSP00000436376 | OMP      | 0.4158 |
| ENSP00000378367 | NRG4     | 0.4158 |
| ENSP00000460475 | NLRP1    | 0.4158 |
| ENSP00000436926 | NFRKB    | 0.4158 |
| ENSP00000382390 | NEURL4   | 0.4158 |
| ENSP00000361475 | NCS1     | 0.4158 |
| ENSP00000303920 | MZB1     | 0.4158 |
| ENSP00000302716 | MUC17    | 0.4158 |
| ENSP00000215743 | MMP11    | 0.4158 |
| ENSP00000361895 | MFSD2A   | 0.4158 |
| ENSP00000267287 | MBNL2    | 0.4158 |
| ENSP00000399718 | MBIP     | 0.4158 |
| ENSP00000261483 | MAN2A1   | 0.4158 |
| ENSP00000265801 | LZTS1    | 0.4158 |
| ENSP00000230568 | LY86     | 0.4158 |
| ENSP00000376910 | LRRIQ1   | 0.4158 |
| ENSP00000278198 | LRRC4C   | 0.4158 |
| ENSP00000379880 | LRRC3B   | 0.4158 |
| ENSP00000355396 | LRIG2    | 0.4158 |
| ENSP00000317300 | LPCAT4   | 0.4158 |
| ENSP00000307214 | LCMT2    | 0.4158 |
| ENSP00000443191 | KLHL13   | 0.4158 |
| ENSP00000234371 | KISS1R   | 0.4158 |
| ENSP00000274629 | KCNMB1   | 0.4158 |
| ENSP00000321427 | KCNH5    | 0.4158 |

|                 |           |        |
|-----------------|-----------|--------|
| ENSP00000337255 | KCNE1     | 0.4158 |
| ENSP00000265969 | KCNC1     | 0.4158 |
| ENSP00000386992 | IPO11     | 0.4158 |
| ENSP00000239347 | IFNA7     | 0.4158 |
| ENSP00000259555 | IFNA5     | 0.4158 |
| ENSP00000465194 | IER3IP1   | 0.4158 |
| ENSP00000333300 | HSD17B13  | 0.4158 |
| ENSP00000259241 | HS6ST1    | 0.4158 |
| ENSP00000244601 | HIST1H2BG | 0.4158 |
| ENSP00000351589 | HIST1H2AI | 0.4158 |
| ENSP00000358727 | GSTO1     | 0.4158 |
| ENSP00000282499 | GRIA4     | 0.4158 |
| ENSP00000259803 | GCM1      | 0.4158 |
| ENSP00000394842 | GCA       | 0.4158 |
| ENSP00000264318 | GABRA4    | 0.4158 |
| ENSP00000265651 | FBXO3     | 0.4158 |
| ENSP00000359778 | ELTD1     | 0.4158 |
| ENSP00000431162 | EID1      | 0.4158 |
| ENSP00000345281 | DUSP22    | 0.4158 |
| ENSP00000317997 | DUOX1     | 0.4158 |
| ENSP00000248041 | CYP4F11   | 0.4158 |
| ENSP00000334128 | CYP27C1   | 0.4158 |
| ENSP00000418348 | CMC1      | 0.4158 |
| ENSP00000384554 | CLDN5     | 0.4158 |
| ENSP00000308870 | CLDN15    | 0.4158 |
| ENSP00000281141 | CDC123    | 0.4158 |
| ENSP00000405708 | CCDC39    | 0.4158 |
| ENSP00000348915 | CBWD1     | 0.4158 |
| ENSP00000361524 | C9orf78   | 0.4158 |
| ENSP00000340296 | C10orf129 | 0.4158 |
| ENSP00000346697 | BMF       | 0.4158 |
| ENSP00000371084 | ATP8A1    | 0.4158 |
| ENSP00000281087 | ATP6V1G3  | 0.4158 |
| ENSP00000252491 | APOC1     | 0.4158 |
| ENSP00000264908 | ANXA3     | 0.4158 |
| ENSP00000346987 | ANAPC13   | 0.4158 |
| ENSP00000307199 | AHSP      | 0.4158 |
| ENSP00000387281 | ADRA2B    | 0.4158 |
| ENSP00000411658 | ADCYAP1   | 0.4158 |
| ENSP00000419446 | ADAM9     | 0.4158 |
| ENSP00000322376 | U2SURP    | 0.4158 |
| ENSP00000352614 | ZSWIM5    | 0.4132 |
| ENSP00000295131 | ZSWIM2    | 0.4132 |
| ENSP00000371905 | ZDHHC20   | 0.4132 |
| ENSP00000243344 | TTC21B    | 0.4132 |
| ENSP00000301364 | TSR1      | 0.4132 |
| ENSP00000449795 | TRIAP1    | 0.4132 |
| ENSP00000381567 | TMF1      | 0.4132 |
| ENSP00000376553 | TMEM119   | 0.4132 |
| ENSP00000417050 | TM4SF2    | 0.4132 |
| ENSP00000347538 | SYT17     | 0.4132 |
| ENSP00000242465 | SRGN      | 0.4132 |
| ENSP00000353670 | SPOCD1    | 0.4132 |

|                 |              |        |
|-----------------|--------------|--------|
| ENSP00000308057 | SNCB         | 0.4132 |
| ENSP00000266088 | SLC5A1       | 0.4132 |
| ENSP00000275230 | SLC2A12      | 0.4132 |
| ENSP00000355384 | SLC26A11     | 0.4132 |
| ENSP00000388658 | SLC25A12     | 0.4132 |
| ENSP00000381698 | SHARPIN      | 0.4132 |
| ENSP00000348471 | SH3YL1       | 0.4132 |
| ENSP00000331376 | SERHL2       | 0.4132 |
| ENSP00000333956 | SELV         | 0.4132 |
| ENSP00000342868 | SCXB         | 0.4132 |
| ENSP00000272430 | RTKN         | 0.4132 |
| ENSP00000330188 | RSRC2        | 0.4132 |
| ENSP00000449334 | RP11-345J4.3 | 0.4132 |
| ENSP00000446654 | RP11-176H8.1 | 0.4132 |
| ENSP00000270357 | RNPEPL1      | 0.4132 |
| ENSP00000262173 | RNMT         | 0.4132 |
| ENSP00000315112 | RNF31        | 0.4132 |
| ENSP00000342667 | RNF19A       | 0.4132 |
| ENSP00000306906 | RNF181       | 0.4132 |
| ENSP00000269439 | RNF165       | 0.4132 |
| ENSP00000292363 | RNF126       | 0.4132 |
| ENSP00000350136 | RIMKLB       | 0.4132 |
| ENSP00000240285 | RDH10        | 0.4132 |
| ENSP00000356991 | PVRL4        | 0.4132 |
| ENSP00000349541 | PTRF         | 0.4132 |
| ENSP00000230582 | PRSS16       | 0.4132 |
| ENSP00000356156 | PPP1R15B     | 0.4132 |
| ENSP00000314724 | PPFIBP1      | 0.4132 |
| ENSP00000330442 | PLB1         | 0.4132 |
| ENSP00000217305 | PDYN         | 0.4132 |
| ENSP00000218004 | NXT2         | 0.4132 |
| ENSP00000356125 | NUAK2        | 0.4132 |
| ENSP00000358783 | NPBWR2       | 0.4132 |
| ENSP00000360464 | NKAP         | 0.4132 |
| ENSP00000298352 | NGB          | 0.4132 |
| ENSP00000324628 | NAPG         | 0.4132 |
| ENSP00000267023 | NABP2        | 0.4132 |
| ENSP00000264444 | MXD1         | 0.4132 |
| ENSP00000357823 | MRPL9        | 0.4132 |
| ENSP00000258169 | MPHOSPH6     | 0.4132 |
| ENSP00000286614 | MMP16        | 0.4132 |
| ENSP00000312678 | MID1         | 0.4132 |
| ENSP00000296135 | LZTFL1       | 0.4132 |
| ENSP00000340118 | LITAF        | 0.4132 |
| ENSP00000365637 | KIAA1217     | 0.4132 |
| ENSP00000352527 | KCNK5        | 0.4132 |
| ENSP00000334650 | KCNK18       | 0.4132 |
| ENSP00000357068 | KCNJ10       | 0.4132 |
| ENSP00000449253 | KCNC2        | 0.4132 |
| ENSP00000379739 | IPP          | 0.4132 |
| ENSP00000314976 | IL20RA       | 0.4132 |
| ENSP00000387941 | IFFO2        | 0.4132 |
| ENSP00000256433 | IER3IP1      | 0.4132 |

|                 |             |        |
|-----------------|-------------|--------|
| ENSP00000384474 | HYPK        | 0.4132 |
| ENSP00000407154 | HSD11B1L    | 0.4132 |
| ENSP00000387088 | HNRPLL      | 0.4132 |
| ENSP00000393566 | HLA-DPA1    | 0.4132 |
| ENSP00000244661 | HIST1H3B    | 0.4132 |
| ENSP00000359171 | HIAT1       | 0.4132 |
| ENSP00000014930 | HEBP1       | 0.4132 |
| ENSP00000326579 | HCCS        | 0.4132 |
| ENSP00000243706 | HAUS3       | 0.4132 |
| ENSP00000334002 | HAP1        | 0.4132 |
| ENSP00000355155 | GRIN3A      | 0.4132 |
| ENSP00000403536 | GAMT        | 0.4132 |
| ENSP00000253801 | G6PC        | 0.4132 |
| ENSP00000376945 | FBXW9       | 0.4132 |
| ENSP00000292853 | FBXO27      | 0.4132 |
| ENSP00000252338 | FAM155B     | 0.4132 |
| ENSP00000261172 | EPYC        | 0.4132 |
| ENSP00000381247 | EFCAB9      | 0.4132 |
| ENSP00000250024 | E2F8        | 0.4132 |
| ENSP00000256261 | DUSP26      | 0.4132 |
| ENSP00000408464 | DOCK8       | 0.4132 |
| ENSP00000270172 | DNMT3L      | 0.4132 |
| ENSP00000360500 | DMRTB1      | 0.4132 |
| ENSP00000247003 | DDX49       | 0.4132 |
| ENSP00000334625 | DCUN1D4     | 0.4132 |
| ENSP00000308032 | CYP2S1      | 0.4132 |
| ENSP00000333534 | CYP2F1      | 0.4132 |
| ENSP00000469517 | CTB-167G5.5 | 0.4132 |
| ENSP00000225387 | CRYBA1      | 0.4132 |
| ENSP00000321856 | CRELD1      | 0.4132 |
| ENSP00000231948 | CRBN        | 0.4132 |
| ENSP00000222481 | CPA2        | 0.4132 |
| ENSP00000011292 | CPA1        | 0.4132 |
| ENSP00000287916 | CLDN12      | 0.4132 |
| ENSP00000320209 | CIDEA       | 0.4132 |
| ENSP00000264993 | CDV3        | 0.4132 |
| ENSP00000350256 | CCR9        | 0.4132 |
| ENSP00000225844 | CCL13       | 0.4132 |
| ENSP00000312706 | CCDC65      | 0.4132 |
| ENSP00000385247 | CAPN14      | 0.4132 |
| ENSP00000333919 | BTLA        | 0.4132 |
| ENSP00000349351 | BICD2       | 0.4132 |
| ENSP00000365131 | BAG6        | 0.4132 |
| ENSP00000421172 | AWAT2       | 0.4132 |
| ENSP00000302194 | ATP6V1G2    | 0.4132 |
| ENSP00000225737 | AKAP10      | 0.4132 |
| ENSP00000373640 | AGPHD1      | 0.4132 |
| ENSP00000370713 | ADARB2      | 0.4132 |
| ENSP00000355777 | ACBD3       | 0.4132 |
| ENSP00000471024 | AC093917.1  | 0.4132 |
| ENSP00000299989 | CATSPER2    | 0.4132 |
| ENSP00000310042 | ZNF622      | 0.4105 |
| ENSP00000379363 | ZNF501      | 0.4105 |

|                 |          |        |
|-----------------|----------|--------|
| ENSP00000251119 | ZFYVE26  | 0.4105 |
| ENSP00000289528 | ZFAND2B  | 0.4105 |
| ENSP00000417677 | ZBTB8OS  | 0.4105 |
| ENSP00000329803 | ZAR1     | 0.4105 |
| ENSP00000342832 | YPEL1    | 0.4105 |
| ENSP00000362549 | UGT1A8   | 0.4105 |
| ENSP00000362508 | UGT1A4   | 0.4105 |
| ENSP00000359904 | TYW3     | 0.4105 |
| ENSP00000352358 | TRPV6    | 0.4105 |
| ENSP00000343709 | SNX10    | 0.4105 |
| ENSP00000285850 | SLC7A7   | 0.4105 |
| ENSP00000243389 | SLC36A1  | 0.4105 |
| ENSP00000387694 | SLC12A5  | 0.4105 |
| ENSP00000313079 | SHISA2   | 0.4105 |
| ENSP00000327436 | SETD3    | 0.4105 |
| ENSP00000379704 | SEPT3    | 0.4105 |
| ENSP00000361855 | SEMG2    | 0.4105 |
| ENSP00000337688 | SEC62    | 0.4105 |
| ENSP00000349486 | SCRIB    | 0.4105 |
| ENSP00000301904 | SCARA3   | 0.4105 |
| ENSP00000297109 | SAP30L   | 0.4105 |
| ENSP00000430237 | RNF130   | 0.4105 |
| ENSP00000267291 | RNF113B  | 0.4105 |
| ENSP00000324127 | PSD3     | 0.4105 |
| ENSP00000360035 | PPP1R3D  | 0.4105 |
| ENSP00000260264 | POU2F3   | 0.4105 |
| ENSP00000442736 | PLXNB3   | 0.4105 |
| ENSP00000026218 | PIGQ     | 0.4105 |
| ENSP00000225538 | P2RX1    | 0.4105 |
| ENSP00000367930 | OXER1    | 0.4105 |
| ENSP00000371155 | NUPL1    | 0.4105 |
| ENSP00000246912 | MLX      | 0.4105 |
| ENSP00000345270 | MGAT3    | 0.4105 |
| ENSP00000373300 | METTL6   | 0.4105 |
| ENSP00000374443 | LYST     | 0.4105 |
| ENSP00000359609 | LMBRD1   | 0.4105 |
| ENSP00000326888 | LIMS2    | 0.4105 |
| ENSP00000431443 | KRTAP5-9 | 0.4105 |
| ENSP00000287777 | KLHL40   | 0.4105 |
| ENSP00000310670 | KIAA1967 | 0.4105 |
| ENSP00000297591 | KIAA1429 | 0.4105 |
| ENSP00000352035 | KCNQ2    | 0.4105 |
| ENSP00000315654 | KCNG2    | 0.4105 |
| ENSP00000337432 | IL17F    | 0.4105 |
| ENSP00000369558 | IFNA6    | 0.4105 |
| ENSP00000194214 | HSPB11   | 0.4105 |
| ENSP00000383516 | HMX1     | 0.4105 |
| ENSP00000274341 | HAPLN1   | 0.4105 |
| ENSP00000362183 | GRIK3    | 0.4105 |
| ENSP00000309493 | GPRC6A   | 0.4105 |
| ENSP00000365806 | GNL1     | 0.4105 |
| ENSP00000359385 | GLMN     | 0.4105 |
| ENSP00000205061 | GLG1     | 0.4105 |

|                 |          |        |
|-----------------|----------|--------|
| ENSP00000248272 | GAN      | 0.4105 |
| ENSP00000376570 | GALNT13  | 0.4105 |
| ENSP00000278882 | FRG1B    | 0.4105 |
| ENSP00000300784 | FN3K     | 0.4105 |
| ENSP00000248076 | F2RL3    | 0.4105 |
| ENSP00000260585 | EPT1     | 0.4105 |
| ENSP00000358045 | ECM1     | 0.4105 |
| ENSP00000356791 | DPT      | 0.4105 |
| ENSP00000334113 | DHRX     | 0.4105 |
| ENSP00000334246 | CYP4Z1   | 0.4105 |
| ENSP00000261835 | CYP46A1  | 0.4105 |
| ENSP00000359507 | CUTC     | 0.4105 |
| ENSP00000358511 | CNR1     | 0.4105 |
| ENSP00000384264 | CNGA1    | 0.4105 |
| ENSP00000316228 | CLEC4M   | 0.4105 |
| ENSP00000353500 | CLEC4C   | 0.4105 |
| ENSP00000357683 | CHTOP    | 0.4105 |
| ENSP00000302629 | CHSY3    | 0.4105 |
| ENSP00000375086 | CCL25    | 0.4105 |
| ENSP00000293280 | CCL23    | 0.4105 |
| ENSP00000219244 | CCL17    | 0.4105 |
| ENSP00000436691 | CARD18   | 0.4105 |
| ENSP00000244513 | BTN1A1   | 0.4105 |
| ENSP00000399709 | BEST1    | 0.4105 |
| ENSP00000261499 | B9D1     | 0.4105 |
| ENSP00000360475 | ARRDC1   | 0.4105 |
| ENSP00000466775 | APOC2    | 0.4105 |
| ENSP00000301030 | ANKRD11  | 0.4105 |
| ENSP00000344241 | ZMAT5    | 0.4079 |
| ENSP00000364840 | VWA7     | 0.4079 |
| ENSP00000366565 | VPS28    | 0.4079 |
| ENSP00000387683 | UGT2B11  | 0.4079 |
| ENSP00000358283 | UFL1     | 0.4079 |
| ENSP00000345294 | TTL13    | 0.4079 |
| ENSP00000265310 | TRPV5    | 0.4079 |
| ENSP00000362205 | TREM2    | 0.4079 |
| ENSP00000356599 | TOR3A    | 0.4079 |
| ENSP00000284856 | TMSB4Y   | 0.4079 |
| ENSP00000299596 | TMEM41B  | 0.4079 |
| ENSP00000061240 | TLL1     | 0.4079 |
| ENSP00000340995 | TEX11    | 0.4079 |
| ENSP00000293970 | TBC1D24  | 0.4079 |
| ENSP00000309794 | TBC1D16  | 0.4079 |
| ENSP00000303325 | TACR3    | 0.4079 |
| ENSP00000293897 | SSTR5    | 0.4079 |
| ENSP00000344967 | SPRY4    | 0.4079 |
| ENSP00000348753 | SPRED2   | 0.4079 |
| ENSP00000335628 | SPDYA    | 0.4079 |
| ENSP00000319597 | SNAPC5   | 0.4079 |
| ENSP00000425133 | SMG7     | 0.4079 |
| ENSP00000319574 | SLC25A19 | 0.4079 |
| ENSP00000265870 | SLC25A16 | 0.4079 |
| ENSP00000262352 | SLC1A1   | 0.4079 |

|                 |               |        |
|-----------------|---------------|--------|
| ENSP00000380250 | SLC17A3       | 0.4079 |
| ENSP00000358541 | SIKE1         | 0.4079 |
| ENSP00000291842 | SHKBP1        | 0.4079 |
| ENSP00000373301 | SH3BP5        | 0.4079 |
| ENSP00000350789 | SFMBT1        | 0.4079 |
| ENSP00000264896 | SCARB2        | 0.4079 |
| ENSP00000406738 | SARM1         | 0.4079 |
| ENSP00000349955 | RPRD1A        | 0.4079 |
| ENSP00000345156 | RPL14         | 0.4079 |
| ENSP00000426906 | RP11-514O12.4 | 0.4079 |
| ENSP00000283632 | RMND5A        | 0.4079 |
| ENSP00000361768 | RIMS3         | 0.4079 |
| ENSP00000401536 | RFX8          | 0.4079 |
| ENSP00000357442 | PYGO2         | 0.4079 |
| ENSP00000267568 | PTGR2         | 0.4079 |
| ENSP00000430548 | PTDSS1        | 0.4079 |
| ENSP00000337194 | PRPF4B        | 0.4079 |
| ENSP00000269844 | PRDM15        | 0.4079 |
| ENSP00000323302 | POC1B         | 0.4079 |
| ENSP00000347883 | PLEKHA7       | 0.4079 |
| ENSP00000348901 | PLD3          | 0.4079 |
| ENSP00000309430 | PIGS          | 0.4079 |
| ENSP00000308361 | P2RY14        | 0.4079 |
| ENSP00000429064 | MTSS1         | 0.4079 |
| ENSP00000359518 | MRGBP         | 0.4079 |
| ENSP00000225275 | MPO           | 0.4079 |
| ENSP00000318077 | MC5R          | 0.4079 |
| ENSP00000368798 | MBTPS2        | 0.4079 |
| ENSP00000359890 | MBNL3         | 0.4079 |
| ENSP00000345917 | LYAR          | 0.4079 |
| ENSP00000274711 | LRRTM2        | 0.4079 |
| ENSP00000366950 | KRTAP9-2      | 0.4079 |
| ENSP00000366629 | KM-PA-2       | 0.4079 |
| ENSP00000336800 | KLHL25        | 0.4079 |
| ENSP00000257408 | KLB           | 0.4079 |
| ENSP00000307694 | KCNS1         | 0.4079 |
| ENSP00000262888 | KCNN4         | 0.4079 |
| ENSP00000304127 | KCNG3         | 0.4079 |
| ENSP00000362935 | ITGB1BP2      | 0.4079 |
| ENSP00000414237 | INTS2         | 0.4079 |
| ENSP00000301464 | IGFBP6        | 0.4079 |
| ENSP00000333277 | HIST2H3D      | 0.4079 |
| ENSP00000264357 | GRIA3         | 0.4079 |
| ENSP00000376384 | GPR123        | 0.4079 |
| ENSP00000280187 | GPM6A         | 0.4079 |
| ENSP00000261858 | GLCE          | 0.4079 |
| ENSP00000295759 | GLB1L         | 0.4079 |
| ENSP00000363603 | FUCA1         | 0.4079 |
| ENSP00000285071 | FLCN          | 0.4079 |
| ENSP00000316491 | FCAMR         | 0.4079 |
| ENSP00000292147 | ETHE1         | 0.4079 |
| ENSP00000261735 | ERP29         | 0.4079 |
| ENSP00000359022 | ELOVL3        | 0.4079 |

|                 |             |        |
|-----------------|-------------|--------|
| ENSP00000345853 | DUSP9       | 0.4079 |
| ENSP00000337572 | DGKH        | 0.4079 |
| ENSP00000360652 | CXorf56     | 0.4079 |
| ENSP00000284878 | CXADR       | 0.4079 |
| ENSP00000365025 | CSNK2B      | 0.4079 |
| ENSP00000341030 | CSN2        | 0.4079 |
| ENSP00000460885 | CORO7-PAM16 | 0.4079 |
| ENSP00000262507 | COQ9        | 0.4079 |
| ENSP00000305913 | COL8A2      | 0.4079 |
| ENSP00000382083 | COL25A1     | 0.4079 |
| ENSP00000244728 | COL21A1     | 0.4079 |
| ENSP00000305442 | COG7        | 0.4079 |
| ENSP00000336587 | CDR2L       | 0.4079 |
| ENSP00000370503 | CCM2        | 0.4079 |
| ENSP00000404220 | CCDC155     | 0.4079 |
| ENSP00000378690 | CALN1       | 0.4079 |
| ENSP00000419081 | CALML4      | 0.4079 |
| ENSP00000216144 | CABP7       | 0.4079 |
| ENSP00000263408 | C9          | 0.4079 |
| ENSP00000313046 | BAI1        | 0.4079 |
| ENSP00000311336 | ATP8B3      | 0.4079 |
| ENSP00000455561 | ATP6C       | 0.4079 |
| ENSP00000334216 | ATP4B       | 0.4079 |
| ENSP00000387435 | ARTN        | 0.4079 |
| ENSP00000348828 | ARHGEF26    | 0.4079 |
| ENSP00000307004 | APLF        | 0.4079 |
| ENSP00000246041 | AP5S1       | 0.4079 |
| ENSP00000265447 | ANXA11      | 0.4079 |
| ENSP00000369434 | ANKRD16     | 0.4079 |
| ENSP00000388275 | AGBL3       | 0.4079 |
| ENSP00000369099 | ADPRM       | 0.4079 |
| ENSP00000262198 | ADNP2       | 0.4079 |
| ENSP00000373472 | ADAMTS7     | 0.4079 |
| ENSP00000370443 | ADAMTS6     | 0.4079 |
| ENSP00000323071 | ACOT4       | 0.4079 |
| ENSP00000269080 | ABCA8       | 0.4079 |
| ENSP00000232892 | AADAC       | 0.4079 |
| ENSP00000442633 | NPIPL3      | 0.4079 |
| ENSP00000358590 | ZNF292      | 0.4053 |
| ENSP00000292579 | ZNF250      | 0.4053 |
| ENSP00000362918 | YTHDF2      | 0.4053 |
| ENSP00000305906 | UTF1        | 0.4053 |
| ENSP00000431876 | USP35       | 0.4053 |
| ENSP00000354039 | UBAP2       | 0.4053 |
| ENSP00000320239 | TRPM7       | 0.4053 |
| ENSP00000343129 | TRIM29      | 0.4053 |
| ENSP00000343505 | TNFSF13     | 0.4053 |
| ENSP00000275780 | TLK2        | 0.4053 |
| ENSP00000370741 | THUMPD1     | 0.4053 |
| ENSP00000343199 | TC2N        | 0.4053 |
| ENSP00000364520 | TAS1R2      | 0.4053 |
| ENSP00000404833 | TAPBP       | 0.4053 |
| ENSP00000384917 | SVEP1       | 0.4053 |



|                 |               |        |
|-----------------|---------------|--------|
| ENSP00000227135 | SPA17         | 0.4053 |
| ENSP00000222584 | SP4           | 0.4053 |
| ENSP00000253188 | SLC7A10       | 0.4053 |
| ENSP00000333433 | SKA2          | 0.4053 |
| ENSP00000450832 | SIPA1L1       | 0.4053 |
| ENSP00000350018 | SH3BP1        | 0.4053 |
| ENSP00000329189 | SETD4         | 0.4053 |
| ENSP00000380824 | SEPT10        | 0.4053 |
| ENSP00000229554 | RSPH4A        | 0.4053 |
| ENSP00000311513 | RSF1          | 0.4053 |
| ENSP00000454445 | RP11-463D19.2 | 0.4053 |
| ENSP00000258646 | RCBTB1        | 0.4053 |
| ENSP00000232217 | RBP2          | 0.4053 |
| ENSP00000368684 | RASSF2        | 0.4053 |
| ENSP00000202677 | RALGAPA2      | 0.4053 |
| ENSP00000329915 | PSMG1         | 0.4053 |
| ENSP00000268124 | POLG          | 0.4053 |
| ENSP00000311368 | POLD4         | 0.4053 |
| ENSP00000351318 | PLEKHG1       | 0.4053 |
| ENSP00000307822 | NPFFR2        | 0.4053 |
| ENSP00000360660 | NPDC1         | 0.4053 |
| ENSP00000345464 | NHLRC1        | 0.4053 |
| ENSP00000330694 | NDNL2         | 0.4053 |
| ENSP00000442464 | NCEH1         | 0.4053 |
| ENSP00000359423 | MTM1          | 0.4053 |
| ENSP00000365693 | MSRB2         | 0.4053 |
| ENSP00000339086 | MKL2          | 0.4053 |
| ENSP00000340900 | MIA3          | 0.4053 |
| ENSP00000260953 | METTL5        | 0.4053 |
| ENSP00000354341 | MEPE          | 0.4053 |
| ENSP00000333181 | MARCH11       | 0.4053 |
| ENSP00000265245 | LSG1          | 0.4053 |
| ENSP00000295057 | LRRTM1        | 0.4053 |
| ENSP00000434849 | LRRC24        | 0.4053 |
| ENSP00000296388 | LEPRE1        | 0.4053 |
| ENSP00000358861 | LCA5          | 0.4053 |
| ENSP00000358786 | KCNA10        | 0.4053 |
| ENSP00000369402 | IFT74         | 0.4053 |
| ENSP00000369574 | IFNA21        | 0.4053 |
| ENSP00000307766 | HTR1E         | 0.4053 |
| ENSP00000252825 | HRC           | 0.4053 |
| ENSP00000244534 | HIST1H1D      | 0.4053 |
| ENSP00000375066 | HCAR2         | 0.4053 |
| ENSP00000339835 | H3F3C         | 0.4053 |
| ENSP00000373176 | GTPBP8        | 0.4053 |
| ENSP00000434045 | GPR68         | 0.4053 |
| ENSP00000362353 | GLP1R         | 0.4053 |
| ENSP00000336832 | GJD3          | 0.4053 |
| ENSP00000376465 | GALNT3        | 0.4053 |
| ENSP00000321320 | FAM203A       | 0.4053 |
| ENSP00000233379 | FAHD2A        | 0.4053 |
| ENSP00000367446 | EXT1          | 0.4053 |
| ENSP00000242108 | EPPD1         | 0.4053 |

|                 |            |        |
|-----------------|------------|--------|
| ENSP00000242317 | DNAI1      | 0.4053 |
| ENSP00000318227 | DCAF8      | 0.4053 |
| ENSP00000300452 | COQ4       | 0.4053 |
| ENSP00000330060 | CNOT10     | 0.4053 |
| ENSP00000263097 | CNN2       | 0.4053 |
| ENSP00000328182 | CLN8       | 0.4053 |
| ENSP00000324491 | CHMP7      | 0.4053 |
| ENSP00000457031 | CHKB-CPT1B | 0.4053 |
| ENSP00000291577 | C21orf33   | 0.4053 |
| ENSP00000401770 | C14orf2    | 0.4053 |
| ENSP00000262865 | BPI        | 0.4053 |
| ENSP00000357591 | BET3L      | 0.4053 |
| ENSP00000364092 | ASIP       | 0.4053 |
| ENSP00000227665 | APOA5      | 0.4053 |
| ENSP00000346550 | ANXA6      | 0.4053 |
| ENSP00000358730 | ADORA3     | 0.4053 |
| ENSP00000418735 | ADAMTS9    | 0.4053 |
| ENSP00000265708 | ADAM2      | 0.4053 |
| ENSP00000310309 | ABLIM3     | 0.4053 |
| ENSP00000263094 | ABCA7      | 0.4053 |
| ENSP00000344155 | ABCA2      | 0.4053 |
| ENSP00000433773 | ZNF585B    | 0.4026 |
| ENSP00000287218 | ZFAND3     | 0.4026 |
| ENSP00000306864 | VASN       | 0.4026 |
| ENSP00000239878 | UFM1       | 0.4026 |
| ENSP00000361990 | UBR2       | 0.4026 |
| ENSP00000355613 | TRIM67     | 0.4026 |
| ENSP00000438204 | TOMM5      | 0.4026 |
| ENSP00000381104 | TM9SF4     | 0.4026 |
| ENSP00000256246 | TEX15      | 0.4026 |
| ENSP00000417569 | STIM2      | 0.4026 |
| ENSP00000234454 | SPR        | 0.4026 |
| ENSP00000352175 | SNX11      | 0.4026 |
| ENSP00000341550 | SLC24A5    | 0.4026 |
| ENSP00000383256 | SIAH3      | 0.4026 |
| ENSP00000351981 | SGMS2      | 0.4026 |
| ENSP00000337212 | SERPINB7   | 0.4026 |
| ENSP00000335024 | SERPINA11  | 0.4026 |
| ENSP00000314173 | SAMD12     | 0.4026 |
| ENSP00000379090 | PPP6R2     | 0.4026 |
| ENSP00000305924 | PPP4R4     | 0.4026 |
| ENSP00000384004 | POU6F2     | 0.4026 |
| ENSP00000309509 | PLAC8      | 0.4026 |
| ENSP00000243501 | PLA2G12A   | 0.4026 |
| ENSP00000360158 | PKHD1      | 0.4026 |
| ENSP00000385795 | PHF14      | 0.4026 |
| ENSP00000429301 | PGRMC2     | 0.4026 |
| ENSP00000278060 | PAOX       | 0.4026 |
| ENSP00000302768 | PAIP1      | 0.4026 |
| ENSP00000376293 | OSBPL6     | 0.4026 |
| ENSP00000341987 | OR51I2     | 0.4026 |
| ENSP00000293973 | NTN3       | 0.4026 |
| ENSP00000330284 | NPBWR1     | 0.4026 |

|                 |           |        |
|-----------------|-----------|--------|
| ENSP00000328854 | NOC4L     | 0.4026 |
| ENSP00000350364 | NEGR1     | 0.4026 |
| ENSP00000340093 | NAPEPLD   | 0.4026 |
| ENSP00000369682 | MRPS26    | 0.4026 |
| ENSP00000354335 | MPEG1     | 0.4026 |
| ENSP00000369860 | MOSPD2    | 0.4026 |
| ENSP00000367668 | MMEL1     | 0.4026 |
| ENSP00000281317 | MMAA      | 0.4026 |
| ENSP00000310375 | MLC1      | 0.4026 |
| ENSP00000363079 | MBL2      | 0.4026 |
| ENSP00000266643 | MARCH9    | 0.4026 |
| ENSP00000274056 | MARCH1    | 0.4026 |
| ENSP00000357453 | MAN1A1    | 0.4026 |
| ENSP00000433433 | MAGEL2    | 0.4026 |
| ENSP00000324701 | MAB21L2   | 0.4026 |
| ENSP00000292616 | LRWD1     | 0.4026 |
| ENSP00000361177 | LRIT1     | 0.4026 |
| ENSP00000347451 | LINGO1    | 0.4026 |
| ENSP00000295682 | KRTCAP2   | 0.4026 |
| ENSP00000246662 | KRT9      | 0.4026 |
| ENSP00000362206 | KLHL4     | 0.4026 |
| ENSP00000328062 | KIAA1033  | 0.4026 |
| ENSP00000371514 | KCNV2     | 0.4026 |
| ENSP00000287042 | KCNS2     | 0.4026 |
| ENSP00000218176 | KCND1     | 0.4026 |
| ENSP00000388723 | KBTBD13   | 0.4026 |
| ENSP00000343000 | IL19      | 0.4026 |
| ENSP00000359787 | IFI44L    | 0.4026 |
| ENSP00000287907 | HTR5A     | 0.4026 |
| ENSP00000336984 | HORMAD2   | 0.4026 |
| ENSP00000244537 | HIST1H4G  | 0.4026 |
| ENSP00000353074 | HIST1H2BF | 0.4026 |
| ENSP00000310621 | HHATL     | 0.4026 |
| ENSP00000367196 | GLIPR2    | 0.4026 |
| ENSP00000345868 | GJB4      | 0.4026 |
| ENSP00000319254 | GIPC3     | 0.4026 |
| ENSP00000233838 | GGCX      | 0.4026 |
| ENSP00000379895 | GATM      | 0.4026 |
| ENSP00000259455 | GABBR2    | 0.4026 |
| ENSP00000274457 | FEM1C     | 0.4026 |
| ENSP00000292852 | FBXO17    | 0.4026 |
| ENSP00000393154 | FBXO15    | 0.4026 |
| ENSP00000369857 | FAM175A   | 0.4026 |
| ENSP00000332111 | EFCAB13   | 0.4026 |
| ENSP00000384223 | ECE2      | 0.4026 |
| ENSP00000337759 | DOM3Z     | 0.4026 |
| ENSP00000383737 | DNAH14    | 0.4026 |
| ENSP00000298292 | DNAAF2    | 0.4026 |
| ENSP00000355114 | DCAF12    | 0.4026 |
| ENSP00000310149 | CYP2W1    | 0.4026 |
| ENSP00000304414 | CXCR6     | 0.4026 |
| ENSP00000278816 | CSRP2BP   | 0.4026 |
| ENSP00000305964 | COX7B2    | 0.4026 |

|                 |            |        |
|-----------------|------------|--------|
| ENSP00000370984 | COMMD8     | 0.4026 |
| ENSP00000316030 | COL19A1    | 0.4026 |
| ENSP00000216361 | COCH       | 0.4026 |
| ENSP00000378130 | CFI        | 0.4026 |
| ENSP00000428864 | CES5A      | 0.4026 |
| ENSP00000306968 | CDCA7      | 0.4026 |
| ENSP00000332659 | CCR4       | 0.4026 |
| ENSP00000353295 | CBWD3      | 0.4026 |
| ENSP00000290039 | CACHD1     | 0.4026 |
| ENSP00000327541 | BLZF1      | 0.4026 |
| ENSP00000258168 | BCMO1      | 0.4026 |
| ENSP00000363645 | AWAT1      | 0.4026 |
| ENSP00000432412 | ATG13      | 0.4026 |
| ENSP00000425658 | ANKRD50    | 0.4026 |
| ENSP00000335147 | ANKRD37    | 0.4026 |
| ENSP00000382379 | ANKRD28    | 0.4026 |
| ENSP00000306163 | ANKRD2     | 0.4026 |
| ENSP00000265742 | ANKIB1     | 0.4026 |
| ENSP00000353920 | ADARB1     | 0.4026 |
| ENSP00000263776 | ACCS       | 0.4026 |
| ENSP00000431116 | AC133919.6 | 0.4026 |
| ENSP00000226840 | AADAT      | 0.4026 |
| ENSP00000303696 | ZNF57      | 0.4000 |
| ENSP00000216923 | ZFP64      | 0.4000 |
| ENSP00000252512 | XPO7       | 0.4000 |
| ENSP00000351141 | WTAP       | 0.4000 |
| ENSP00000386156 | WIBG       | 0.4000 |
| ENSP00000272930 | UBE2F      | 0.4000 |
| ENSP00000305524 | TSEN34     | 0.4000 |
| ENSP00000354006 | TRPM6      | 0.4000 |
| ENSP00000330774 | TMEM106A   | 0.4000 |
| ENSP00000350718 | TMCC2      | 0.4000 |
| ENSP00000273037 | TAMM41     | 0.4000 |
| ENSP00000243918 | SYS1       | 0.4000 |
| ENSP00000348496 | SUN5       | 0.4000 |
| ENSP00000346599 | STYX       | 0.4000 |
| ENSP00000428338 | SPSB2      | 0.4000 |
| ENSP00000295872 | SPICE1     | 0.4000 |
| ENSP00000309831 | SNUPN      | 0.4000 |
| ENSP00000369446 | SMAGP      | 0.4000 |
| ENSP00000253122 | SLC6A8     | 0.4000 |
| ENSP00000363852 | SLC44A1    | 0.4000 |
| ENSP00000360773 | SLC29A1    | 0.4000 |
| ENSP00000362159 | SLC25A25   | 0.4000 |
| ENSP00000275730 | SLC12A9    | 0.4000 |
| ENSP00000329213 | SIVA1      | 0.4000 |
| ENSP00000325827 | SEC16A     | 0.4000 |
| ENSP00000271638 | S100A11    | 0.4000 |
| ENSP00000364235 | RNF5       | 0.4000 |
| ENSP00000317039 | RMI1       | 0.4000 |
| ENSP00000171214 | RDH8       | 0.4000 |
| ENSP00000228843 | RAD51AP1   | 0.4000 |
| ENSP00000310088 | PTMS       | 0.4000 |

|                 |            |        |
|-----------------|------------|--------|
| ENSP00000328178 | PPP1R2     | 0.4000 |
| ENSP00000323927 | PLXDC1     | 0.4000 |
| ENSP00000361337 | PLAC9      | 0.4000 |
| ENSP00000364257 | PLA2G2E    | 0.4000 |
| ENSP00000355014 | PJA1       | 0.4000 |
| ENSP00000330031 | PIWIL3     | 0.4000 |
| ENSP00000262265 | PIH1D1     | 0.4000 |
| ENSP00000267460 | PELI2      | 0.4000 |
| ENSP00000277508 | PAEP       | 0.4000 |
| ENSP00000343339 | P2RX2      | 0.4000 |
| ENSP00000309673 | OR52W1     | 0.4000 |
| ENSP00000219022 | OLFM4      | 0.4000 |
| ENSP00000287706 | NTAN1      | 0.4000 |
| ENSP00000301295 | NLRP4      | 0.4000 |
| ENSP00000313088 | NETO1      | 0.4000 |
| ENSP00000368716 | NAA16      | 0.4000 |
| ENSP00000311500 | MZT2A      | 0.4000 |
| ENSP00000259873 | MRPS18B    | 0.4000 |
| ENSP00000339881 | MIOS       | 0.4000 |
| ENSP00000354850 | MGEA5      | 0.4000 |
| ENSP00000262432 | METTL2B    | 0.4000 |
| ENSP00000364847 | MAGED1     | 0.4000 |
| ENSP00000261978 | LTBP2      | 0.4000 |
| ENSP00000403495 | LTA        | 0.4000 |
| ENSP00000293406 | LSM12      | 0.4000 |
| ENSP00000326128 | LARP4B     | 0.4000 |
| ENSP00000397598 | KY         | 0.4000 |
| ENSP00000310861 | KRT2       | 0.4000 |
| ENSP00000344668 | KRIT1      | 0.4000 |
| ENSP00000279544 | KLRF1      | 0.4000 |
| ENSP00000250916 | KLF16      | 0.4000 |
| ENSP00000307265 | IRF2BP1    | 0.4000 |
| ENSP00000325423 | INPP1      | 0.4000 |
| ENSP00000376410 | INF2       | 0.4000 |
| ENSP00000384432 | ICOSLG     | 0.4000 |
| ENSP00000445831 | HIST2H2BF  | 0.4000 |
| ENSP00000444823 | HIST1H3F   | 0.4000 |
| ENSP00000261917 | HCN4       | 0.4000 |
| ENSP00000222304 | HAMP       | 0.4000 |
| ENSP00000397026 | GRIK2      | 0.4000 |
| ENSP00000375893 | GPR55      | 0.4000 |
| ENSP00000262441 | GLP2R      | 0.4000 |
| ENSP00000266069 | GID8       | 0.4000 |
| ENSP00000415635 | GGTLC3     | 0.4000 |
| ENSP00000278765 | GGTLC1     | 0.4000 |
| ENSP00000275428 | GGCT       | 0.4000 |
| ENSP00000299727 | GALR1      | 0.4000 |
| ENSP00000323065 | GADD45GIP1 | 0.4000 |
| ENSP00000341821 | FPR3       | 0.4000 |
| ENSP00000229769 | FANCE      | 0.4000 |
| ENSP00000443411 | FAM92B     | 0.4000 |
| ENSP00000366623 | FAM203B    | 0.4000 |
| ENSP00000373808 | FAM169A    | 0.4000 |

|                 |              |        |
|-----------------|--------------|--------|
| ENSP00000300215 | EPB42        | 0.4000 |
| ENSP00000220853 | EMC2         | 0.4000 |
| ENSP00000307843 | EGFL7        | 0.4000 |
| ENSP00000343244 | DUSP21       | 0.4000 |
| ENSP00000344277 | DOK4         | 0.4000 |
| ENSP00000470082 | DEDD2        | 0.4000 |
| ENSP00000321573 | DCBLD2       | 0.4000 |
| ENSP00000341351 | DCAF5        | 0.4000 |
| ENSP00000246012 | CST8         | 0.4000 |
| ENSP00000413575 | CROT         | 0.4000 |
| ENSP00000394770 | CMYA5        | 0.4000 |
| ENSP00000454253 | CLN3         | 0.4000 |
| ENSP00000339292 | CLDN14       | 0.4000 |
| ENSP00000259216 | CFC1         | 0.4000 |
| ENSP00000313875 | CD46         | 0.4000 |
| ENSP00000357152 | CD1C         | 0.4000 |
| ENSP00000219235 | CCL22        | 0.4000 |
| ENSP00000300900 | CA4          | 0.4000 |
| ENSP00000298295 | C10orf10     | 0.4000 |
| ENSP00000231668 | BNIP1        | 0.4000 |
| ENSP00000256496 | ARL8B        | 0.4000 |
| ENSP00000468354 | ANKRD29      | 0.4000 |
| ENSP00000270593 | ACPT         | 0.4000 |
| ENSP00000360366 | ACOT11       | 0.4000 |
| ENSP00000354193 | ABP1         | 0.4000 |
| ENSP00000261332 | ZNF24        | 0.3974 |
| ENSP00000362465 | ZDHHC15      | 0.3974 |
| ENSP00000337839 | ZCCHC7       | 0.3974 |
| ENSP00000381821 | YPEL3        | 0.3974 |
| ENSP00000207870 | XYLB         | 0.3974 |
| ENSP00000310590 | USP36        | 0.3974 |
| ENSP00000412922 | URM1         | 0.3974 |
| ENSP00000356308 | ULBP3        | 0.3974 |
| ENSP00000384312 | TRIOBP       | 0.3974 |
| ENSP00000397073 | TRIM10       | 0.3974 |
| ENSP00000356584 | TOR1AIP2     | 0.3974 |
| ENSP00000457601 | TMSB15B      | 0.3974 |
| ENSP00000282382 | TMED7-TICAM2 | 0.3974 |
| ENSP00000334294 | TCFL5        | 0.3974 |
| ENSP00000344411 | TAS1R3       | 0.3974 |
| ENSP00000361998 | TAF7L        | 0.3974 |
| ENSP00000314971 | TAF1D        | 0.3974 |
| ENSP00000324419 | SYT9         | 0.3974 |
| ENSP00000011691 | SS18L2       | 0.3974 |
| ENSP00000298130 | SPTSSA       | 0.3974 |
| ENSP00000289431 | SPATA2       | 0.3974 |
| ENSP00000304930 | SOSTDC1      | 0.3974 |
| ENSP00000336543 | SNURF        | 0.3974 |
| ENSP00000221573 | SNAPC2       | 0.3974 |
| ENSP00000405600 | SLC4A2       | 0.3974 |
| ENSP00000354721 | SLC26A1      | 0.3974 |
| ENSP00000253063 | SESN2        | 0.3974 |
| ENSP00000356437 | SASH1        | 0.3974 |

|                 |                |        |
|-----------------|----------------|--------|
| ENSP00000259030 | RTP4           | 0.3974 |
| ENSP00000451484 | RP5-1021I20.4  | 0.3974 |
| ENSP00000382101 | RP11-166B2.1   | 0.3974 |
| ENSP00000454746 | RP11-1035H13.3 | 0.3974 |
| ENSP00000338293 | ROMO1          | 0.3974 |
| ENSP00000295640 | RNPEP          | 0.3974 |
| ENSP00000237455 | RNF103         | 0.3974 |
| ENSP00000356529 | RGS16          | 0.3974 |
| ENSP00000417291 | REPIN1         | 0.3974 |
| ENSP00000377801 | RCCD1          | 0.3974 |
| ENSP00000349783 | RC3H2          | 0.3974 |
| ENSP00000226105 | RANGRF         | 0.3974 |
| ENSP00000344829 | QPCT           | 0.3974 |
| ENSP00000252804 | PXDN           | 0.3974 |
| ENSP00000359793 | PTGFR          | 0.3974 |
| ENSP00000261534 | POMT2          | 0.3974 |
| ENSP00000376372 | PLD4           | 0.3974 |
| ENSP00000409637 | PLCL2          | 0.3974 |
| ENSP00000367096 | PCDH9          | 0.3974 |
| ENSP00000249389 | OPN1SW         | 0.3974 |
| ENSP00000379401 | ODAM           | 0.3974 |
| ENSP00000463013 | OAZ2           | 0.3974 |
| ENSP00000277942 | NPFFR1         | 0.3974 |
| ENSP00000315674 | NOP14          | 0.3974 |
| ENSP00000349313 | NHEJ1          | 0.3974 |
| ENSP00000307449 | NECAB2         | 0.3974 |
| ENSP00000330787 | NDUFB1         | 0.3974 |
| ENSP00000372313 | MSLN           | 0.3974 |
| ENSP00000338057 | MRPL30         | 0.3974 |
| ENSP00000317271 | MCFD2          | 0.3974 |
| ENSP00000369395 | LRRC19         | 0.3974 |
| ENSP00000369252 | LRIT3          | 0.3974 |
| ENSP00000357288 | LAMTOR2        | 0.3974 |
| ENSP00000278671 | LAMTOR1        | 0.3974 |
| ENSP00000379434 | KLHL28         | 0.3974 |
| ENSP00000368464 | KIF24          | 0.3974 |
| ENSP00000313885 | KIAA0195       | 0.3974 |
| ENSP00000430338 | INTS8          | 0.3974 |
| ENSP00000357583 | INPP5A         | 0.3974 |
| ENSP00000329312 | IGLL1          | 0.3974 |
| ENSP00000264020 | IFT46          | 0.3974 |
| ENSP00000333639 | IFNL2          | 0.3974 |
| ENSP00000276943 | IFNK           | 0.3974 |
| ENSP00000359783 | IFI44          | 0.3974 |
| ENSP00000339801 | IDS            | 0.3974 |
| ENSP00000261374 | HS3ST2         | 0.3974 |
| ENSP00000358160 | HIST1H3H       | 0.3974 |
| ENSP00000439660 | HIST1H3G       | 0.3974 |
| ENSP00000347119 | H2BFM          | 0.3974 |
| ENSP00000256594 | GSTM3          | 0.3974 |
| ENSP00000359998 | GSTA4          | 0.3974 |
| ENSP00000455469 | GJE1           | 0.3974 |
| ENSP00000320180 | GHRHR          | 0.3974 |

|                 |                 |        |
|-----------------|-----------------|--------|
| ENSP00000249041 | GALR3           | 0.3974 |
| ENSP00000296591 | EDIL3           | 0.3974 |
| ENSP00000315465 | DSCAML1         | 0.3974 |
| ENSP00000371846 | DEAF1           | 0.3974 |
| ENSP00000386870 | DCDC2B          | 0.3974 |
| ENSP00000351059 | CX3CR1          | 0.3974 |
| ENSP00000217423 | CST4            | 0.3974 |
| ENSP00000304822 | CSN3            | 0.3974 |
| ENSP00000441462 | CSMD1           | 0.3974 |
| ENSP00000255030 | CRP             | 0.3974 |
| ENSP00000339155 | CRISP2          | 0.3974 |
| ENSP00000351310 | COL6A6          | 0.3974 |
| ENSP00000460850 | CLUAP1          | 0.3974 |
| ENSP00000234488 | CLCN6           | 0.3974 |
| ENSP00000263671 | CHRDL2          | 0.3974 |
| ENSP00000200676 | CETP            | 0.3974 |
| ENSP00000354458 | C8A             | 0.3974 |
| ENSP00000358575 | C6orf165        | 0.3974 |
| ENSP00000334130 | C11orf30        | 0.3974 |
| ENSP00000306822 | AVEN            | 0.3974 |
| ENSP00000410759 | ATXN7L1         | 0.3974 |
| ENSP00000247178 | ATG14           | 0.3974 |
| ENSP00000383059 | ARGLU1          | 0.3974 |
| ENSP00000350541 | AQPEP           | 0.3974 |
| ENSP00000341674 | ANXA8           | 0.3974 |
| ENSP00000257527 | ADAM19          | 0.3974 |
| ENSP00000248450 | AAMP            | 0.3974 |
| ENSP00000346572 | 61E3.4          | 0.3974 |
| ENSP00000451628 | ENSG00000258447 | 0.3974 |
| ENSP00000318373 | ZNF513          | 0.3947 |
| ENSP00000418259 | ZFP57           | 0.3947 |
| ENSP00000352821 | ZDHHC14         | 0.3947 |
| ENSP00000419153 | ZBTB20          | 0.3947 |
| ENSP00000312272 | YPEL2           | 0.3947 |
| ENSP00000402219 | VSIG1           | 0.3947 |
| ENSP00000219689 | USP31           | 0.3947 |
| ENSP00000257548 | USP30           | 0.3947 |
| ENSP00000391879 | TRIM26          | 0.3947 |
| ENSP00000369299 | TRIM22          | 0.3947 |
| ENSP00000299045 | TCP11L2         | 0.3947 |
| ENSP00000367802 | TAF1C           | 0.3947 |
| ENSP00000443168 | STH             | 0.3947 |
| ENSP00000319678 | ST5             | 0.3947 |
| ENSP00000307340 | SPRR1A          | 0.3947 |
| ENSP00000023064 | SLC7A9          | 0.3947 |
| ENSP00000330199 | SLC6A17         | 0.3947 |
| ENSP00000254488 | SLC6A11         | 0.3947 |
| ENSP00000296589 | SLC45A2         | 0.3947 |
| ENSP00000400932 | SLC35G1         | 0.3947 |
| ENSP00000280871 | SLC2A13         | 0.3947 |
| ENSP00000314606 | SGSH            | 0.3947 |
| ENSP00000310803 | SFT2D3          | 0.3947 |
| ENSP00000265361 | SEMA3C          | 0.3947 |



|                 |                |        |
|-----------------|----------------|--------|
| ENSP00000296694 | SCGB3A2        | 0.3947 |
| ENSP00000395259 | SCAND3         | 0.3947 |
| ENSP00000253788 | RPL27          | 0.3947 |
| ENSP00000432029 | RP11-719K4.2   | 0.3947 |
| ENSP00000435325 | RP11-1212A22.2 | 0.3947 |
| ENSP00000256257 | RNF122         | 0.3947 |
| ENSP00000337623 | RNASEH2B       | 0.3947 |
| ENSP00000414330 | RIMKLA         | 0.3947 |
| ENSP00000376583 | RIC8B          | 0.3947 |
| ENSP00000258302 | RGS8           | 0.3947 |
| ENSP00000363516 | RCAN3          | 0.3947 |
| ENSP00000282884 | RASSF8         | 0.3947 |
| ENSP00000344547 | PTMA           | 0.3947 |
| ENSP00000272847 | PTH2R          | 0.3947 |
| ENSP00000452296 | POTEM          | 0.3947 |
| ENSP00000429344 | PNMA2          | 0.3947 |
| ENSP00000274793 | PLA2G7         | 0.3947 |
| ENSP00000433597 | PKD1P1         | 0.3947 |
| ENSP00000363124 | PHF20          | 0.3947 |
| ENSP00000326519 | PAGR1          | 0.3947 |
| ENSP00000316454 | PACS1          | 0.3947 |
| ENSP00000247026 | NSRP1          | 0.3947 |
| ENSP00000370372 | NLN            | 0.3947 |
| ENSP00000303580 | NKIRAS2        | 0.3947 |
| ENSP00000392057 | MTUS2          | 0.3947 |
| ENSP00000338235 | MTDH           | 0.3947 |
| ENSP00000447547 | MRPL42         | 0.3947 |
| ENSP00000264790 | MMRN1          | 0.3947 |
| ENSP00000246186 | MMP24          | 0.3947 |
| ENSP00000170447 | MKRN2          | 0.3947 |
| ENSP00000292596 | LTC4S          | 0.3947 |
| ENSP00000301873 | LTBP3          | 0.3947 |
| ENSP00000259324 | LRRC8A         | 0.3947 |
| ENSP00000269025 | LRRC46         | 0.3947 |
| ENSP00000335223 | LCE4A          | 0.3947 |
| ENSP00000381009 | KRTAP10-9      | 0.3947 |
| ENSP00000375682 | KLK8           | 0.3947 |
| ENSP00000386389 | KLHL30         | 0.3947 |
| ENSP00000367075 | KLHL1          | 0.3947 |
| ENSP00000312129 | KCNG4          | 0.3947 |
| ENSP00000262648 | KAL1           | 0.3947 |
| ENSP00000264260 | IL18RAP        | 0.3947 |
| ENSP00000369571 | IFNA14         | 0.3947 |
| ENSP00000429473 | HS6ST2         | 0.3947 |
| ENSP00000308107 | HPSE           | 0.3947 |
| ENSP00000414109 | HJURP          | 0.3947 |
| ENSP00000358154 | HIST2H3C       | 0.3947 |
| ENSP00000397566 | GTF2IRD1       | 0.3947 |
| ENSP00000243673 | GPR83          | 0.3947 |
| ENSP00000406367 | GPR124         | 0.3947 |
| ENSP00000271732 | GOLPH3L        | 0.3947 |
| ENSP00000266068 | GMEB2          | 0.3947 |
| ENSP00000282570 | GMCL1          | 0.3947 |

|                 |          |        |
|-----------------|----------|--------|
| ENSP00000358358 | GJA10    | 0.3947 |
| ENSP00000419751 | GGTLC2   | 0.3947 |
| ENSP00000369600 | FRY      | 0.3947 |
| ENSP00000400223 | FJX1     | 0.3947 |
| ENSP00000359375 | FATE1    | 0.3947 |
| ENSP00000330875 | FANCF    | 0.3947 |
| ENSP00000384880 | FAM49B   | 0.3947 |
| ENSP00000382646 | FAM166B  | 0.3947 |
| ENSP00000355204 | FAM110B  | 0.3947 |
| ENSP00000352540 | EMP2     | 0.3947 |
| ENSP00000317564 | EID2B    | 0.3947 |
| ENSP00000253392 | EDA2R    | 0.3947 |
| ENSP00000271385 | DUSP27   | 0.3947 |
| ENSP00000322180 | DSCC1    | 0.3947 |
| ENSP00000371451 | DNAJC21  | 0.3947 |
| ENSP00000280056 | DHRS12   | 0.3947 |
| ENSP00000316476 | DEGS1    | 0.3947 |
| ENSP00000323155 | DAND5    | 0.3947 |
| ENSP00000285949 | CYP26C1  | 0.3947 |
| ENSP00000273153 | CSRNP1   | 0.3947 |
| ENSP00000338276 | CRISP1   | 0.3947 |
| ENSP00000220763 | CPQ      | 0.3947 |
| ENSP00000396163 | CLEC2A   | 0.3947 |
| ENSP00000362207 | CHST3    | 0.3947 |
| ENSP00000255380 | CHRM3    | 0.3947 |
| ENSP00000439856 | CHERP    | 0.3947 |
| ENSP00000293636 | CELA1    | 0.3947 |
| ENSP00000250535 | CDO1     | 0.3947 |
| ENSP00000242786 | CD97     | 0.3947 |
| ENSP00000283285 | CD96     | 0.3947 |
| ENSP00000356545 | CACNA1E  | 0.3947 |
| ENSP00000361005 | ATPAF1   | 0.3947 |
| ENSP00000427941 | ATP6V0E1 | 0.3947 |
| ENSP00000367638 | ARHGEF39 | 0.3947 |
| ENSP00000350425 | APOA4    | 0.3947 |
| ENSP00000298861 | AGBL2    | 0.3947 |
| ENSP00000284425 | ABCA6    | 0.3947 |
| ENSP00000272895 | ABCA12   | 0.3947 |
| ENSP00000404439 | 61E3.4   | 0.3947 |
| ENSP00000430853 | 61E3.4   | 0.3947 |
| ENSP00000297857 | ZHX1     | 0.3921 |
| ENSP00000370303 | ZDHHC21  | 0.3921 |
| ENSP00000279281 | VPS51    | 0.3921 |
| ENSP00000314556 | UACA     | 0.3921 |
| ENSP00000362546 | TTI1     | 0.3921 |
| ENSP00000422496 | TTC39B   | 0.3921 |
| ENSP00000173898 | TRO      | 0.3921 |
| ENSP00000362013 | TRERF1   | 0.3921 |
| ENSP00000330289 | TRAPPC6B | 0.3921 |
| ENSP00000352413 | TMC3     | 0.3921 |
| ENSP00000317170 | TIGD2    | 0.3921 |
| ENSP00000406052 | TDRD5    | 0.3921 |
| ENSP00000342098 | SPINT1   | 0.3921 |

|                 |               |        |
|-----------------|---------------|--------|
| ENSP00000375899 | SP140         | 0.3921 |
| ENSP00000233575 | SNX17         | 0.3921 |
| ENSP00000308893 | SNED1         | 0.3921 |
| ENSP00000270066 | SMG9          | 0.3921 |
| ENSP00000349174 | SLC39A8       | 0.3921 |
| ENSP00000381634 | SLC38A1       | 0.3921 |
| ENSP00000334223 | SLC36A2       | 0.3921 |
| ENSP00000333591 | SLC35D3       | 0.3921 |
| ENSP00000362469 | SLC2A8        | 0.3921 |
| ENSP00000297578 | SLC25A32      | 0.3921 |
| ENSP00000391249 | SEPT9         | 0.3921 |
| ENSP00000306844 | SEMA4C        | 0.3921 |
| ENSP00000429969 | SCUBE2        | 0.3921 |
| ENSP00000370196 | SBF1          | 0.3921 |
| ENSP00000431814 | RP11-467M13.1 | 0.3921 |
| ENSP00000415840 | RP11-295K3.1  | 0.3921 |
| ENSP00000295317 | RNF149        | 0.3921 |
| ENSP00000341874 | RIOK3         | 0.3921 |
| ENSP00000294413 | RHCE          | 0.3921 |
| ENSP00000295971 | RBM47         | 0.3921 |
| ENSP00000362123 | PLA2G12B      | 0.3921 |
| ENSP00000376865 | PDGFD         | 0.3921 |
| ENSP00000328216 | ORAI1         | 0.3921 |
| ENSP00000340328 | NYX           | 0.3921 |
| ENSP00000330070 | NPW           | 0.3921 |
| ENSP00000292199 | NLRX1         | 0.3921 |
| ENSP00000216121 | NIPSNAP1      | 0.3921 |
| ENSP00000268766 | NEK8          | 0.3921 |
| ENSP00000311364 | MUCL1         | 0.3921 |
| ENSP00000261413 | MRPS27        | 0.3921 |
| ENSP00000244230 | MPHOSPH10     | 0.3921 |
| ENSP00000306220 | MMGT1         | 0.3921 |
| ENSP00000262370 | MGRN1         | 0.3921 |
| ENSP00000296350 | MFI2          | 0.3921 |
| ENSP00000276282 | MFHAS1        | 0.3921 |
| ENSP00000268150 | MFGE8         | 0.3921 |
| ENSP00000376127 | MAU2          | 0.3921 |
| ENSP00000285879 | MAGEC1        | 0.3921 |
| ENSP00000337733 | KLK5          | 0.3921 |
| ENSP00000301420 | KLK1          | 0.3921 |
| ENSP00000327468 | KLHDC8B       | 0.3921 |
| ENSP00000354848 | KIAA1279      | 0.3921 |
| ENSP00000280684 | KCNA6         | 0.3921 |
| ENSP00000233957 | IL18R1        | 0.3921 |
| ENSP00000316664 | IGSF8         | 0.3921 |
| ENSP00000347754 | HTR3A         | 0.3921 |
| ENSP00000384889 | HIC2          | 0.3921 |
| ENSP00000300605 | HDHD2         | 0.3921 |
| ENSP00000358452 | H2AFB3        | 0.3921 |
| ENSP00000345023 | GSTO2         | 0.3921 |
| ENSP00000431049 | GSTK1         | 0.3921 |
| ENSP00000417161 | GPR143        | 0.3921 |
| ENSP00000267731 | GOLGA8B       | 0.3921 |

|                 |                |        |
|-----------------|----------------|--------|
| ENSP00000350415 | GJA9           | 0.3921 |
| ENSP00000241256 | GHSR           | 0.3921 |
| ENSP00000357914 | GABPB2         | 0.3921 |
| ENSP00000246841 | FLRT1          | 0.3921 |
| ENSP00000251547 | FBXO44         | 0.3921 |
| ENSP00000371805 | FBXL18         | 0.3921 |
| ENSP00000377549 | FABP6          | 0.3921 |
| ENSP00000363616 | EDEM2          | 0.3921 |
| ENSP00000302051 | ECEL1          | 0.3921 |
| ENSP00000341658 | DUSP15         | 0.3921 |
| ENSP00000450980 | DIO2           | 0.3921 |
| ENSP00000275884 | DENND2A        | 0.3921 |
| ENSP00000334592 | CYP2R1         | 0.3921 |
| ENSP00000282251 | CWF19L2        | 0.3921 |
| ENSP00000317257 | CPNE1          | 0.3921 |
| ENSP00000330730 | COA5           | 0.3921 |
| ENSP00000368824 | CNKSR2         | 0.3921 |
| ENSP00000318113 | CLDN22         | 0.3921 |
| ENSP00000363041 | CISD1          | 0.3921 |
| ENSP00000254190 | CHSY1          | 0.3921 |
| ENSP00000035307 | CHPF2          | 0.3921 |
| ENSP00000329507 | CD300C         | 0.3921 |
| ENSP00000299367 | C2             | 0.3921 |
| ENSP00000435634 | C1orf94        | 0.3921 |
| ENSP00000381377 | C15orf38-AP3S2 | 0.3921 |
| ENSP00000265016 | BST1           | 0.3921 |
| ENSP00000338814 | BAG5           | 0.3921 |
| ENSP00000312457 | BAALC          | 0.3921 |
| ENSP00000339404 | ASCC1          | 0.3921 |
| ENSP00000391137 | ASB10          | 0.3921 |
| ENSP00000312458 | ARV1           | 0.3921 |
| ENSP00000345179 | APOD           | 0.3921 |
| ENSP00000321679 | ANKRD23        | 0.3921 |
| ENSP00000382218 | ZSWIM7         | 0.3895 |
| ENSP00000307746 | ZNF608         | 0.3895 |
| ENSP00000387091 | ZNF365         | 0.3895 |
| ENSP00000368801 | WBP4           | 0.3895 |
| ENSP00000303908 | TWF2           | 0.3895 |
| ENSP00000325266 | TTC9C          | 0.3895 |
| ENSP00000374332 | TSN            | 0.3895 |
| ENSP00000349324 | TNFRSF10C      | 0.3895 |
| ENSP00000374484 | TMEM87A        | 0.3895 |
| ENSP00000222543 | TFPI2          | 0.3895 |
| ENSP00000399753 | TEX13A         | 0.3895 |
| ENSP00000349291 | TBC1D9B        | 0.3895 |
| ENSP00000331867 | TAS1R1         | 0.3895 |
| ENSP00000408792 | SP8            | 0.3895 |
| ENSP00000323549 | SLC6A18        | 0.3895 |
| ENSP00000202831 | SLC24A6        | 0.3895 |
| ENSP00000406546 | SLC23A3        | 0.3895 |
| ENSP00000337335 | SLC22A8        | 0.3895 |
| ENSP00000245407 | SLC22A5        | 0.3895 |
| ENSP00000396586 | SLC22A24       | 0.3895 |

|                 |              |        |
|-----------------|--------------|--------|
| ENSP00000279477 | SIRPB1       | 0.3895 |
| ENSP00000264677 | SERPINI2     | 0.3895 |
| ENSP00000328729 | SEP15        | 0.3895 |
| ENSP00000437133 | RP11-719K4.1 | 0.3895 |
| ENSP00000355308 | PTPLA        | 0.3895 |
| ENSP00000365963 | PPP1R11      | 0.3895 |
| ENSP00000386971 | POTEG        | 0.3895 |
| ENSP00000301908 | PNOC         | 0.3895 |
| ENSP00000361508 | PLTP         | 0.3895 |
| ENSP00000364243 | PLA2G2F      | 0.3895 |
| ENSP00000357069 | PIGM         | 0.3895 |
| ENSP00000362456 | PBDC1        | 0.3895 |
| ENSP00000336607 | P2RX4        | 0.3895 |
| ENSP00000353078 | NRAP         | 0.3895 |
| ENSP00000367398 | NPHP4        | 0.3895 |
| ENSP00000296597 | NDUFAF2      | 0.3895 |
| ENSP00000354223 | MPC1         | 0.3895 |
| ENSP00000391227 | MGAT5B       | 0.3895 |
| ENSP00000307423 | MGAT2        | 0.3895 |
| ENSP00000251472 | MAST1        | 0.3895 |
| ENSP00000325313 | MAP1S        | 0.3895 |
| ENSP00000349085 | MAGEA1       | 0.3895 |
| ENSP00000307445 | LTB4R        | 0.3895 |
| ENSP00000454748 | LRRC9        | 0.3895 |
| ENSP00000332674 | LRRC8B       | 0.3895 |
| ENSP00000249363 | LRRC4        | 0.3895 |
| ENSP00000375478 | KRTAP10-3    | 0.3895 |
| ENSP00000369349 | KRT81        | 0.3895 |
| ENSP00000293303 | KLHL10       | 0.3895 |
| ENSP00000272748 | KIAA1715     | 0.3895 |
| ENSP00000260598 | KHK          | 0.3895 |
| ENSP00000331698 | KCNJ15       | 0.3895 |
| ENSP00000233826 | KCNJ13       | 0.3895 |
| ENSP00000267615 | ITPK1        | 0.3895 |
| ENSP00000356063 | IL20         | 0.3895 |
| ENSP00000282466 | IGSF10       | 0.3895 |
| ENSP00000394494 | IFNA13       | 0.3895 |
| ENSP00000292433 | IER2         | 0.3895 |
| ENSP00000302562 | HSPBAP1      | 0.3895 |
| ENSP00000376162 | HOMER3       | 0.3895 |
| ENSP00000349478 | HCAR1        | 0.3895 |
| ENSP00000211122 | GSTA3        | 0.3895 |
| ENSP00000254799 | GRSF1        | 0.3895 |
| ENSP00000404063 | GRIK4        | 0.3895 |
| ENSP00000352111 | GOLGA8A      | 0.3895 |
| ENSP00000268719 | GID4         | 0.3895 |
| ENSP00000318142 | FUT7         | 0.3895 |
| ENSP00000312021 | FUT1         | 0.3895 |
| ENSP00000288078 | FUK          | 0.3895 |
| ENSP00000263578 | FOXRED1      | 0.3895 |
| ENSP00000257209 | FHOD3        | 0.3895 |
| ENSP00000264072 | FCER2        | 0.3895 |
| ENSP00000262365 | FAM86B2      | 0.3895 |

|                 |                 |        |
|-----------------|-----------------|--------|
| ENSP00000358458 | FAM46C          | 0.3895 |
| ENSP00000356058 | FAIM3           | 0.3895 |
| ENSP00000202816 | ESF1            | 0.3895 |
| ENSP00000318982 | EPSTI1          | 0.3895 |
| ENSP00000346412 | ELP5            | 0.3895 |
| ENSP00000269445 | DYM             | 0.3895 |
| ENSP00000360635 | DPP7            | 0.3895 |
| ENSP00000328690 | DDX24           | 0.3895 |
| ENSP00000440698 | DBI             | 0.3895 |
| ENSP00000362401 | CYSLTR1         | 0.3895 |
| ENSP00000388320 | CTU2            | 0.3895 |
| ENSP00000241305 | CPXM2           | 0.3895 |
| ENSP00000369979 | CPXM1           | 0.3895 |
| ENSP00000351767 | COL20A1         | 0.3895 |
| ENSP00000365256 | CLCN5           | 0.3895 |
| ENSP00000258711 | CHST12          | 0.3895 |
| ENSP00000287202 | CELF6           | 0.3895 |
| ENSP00000256343 | CATSPERB        | 0.3895 |
| ENSP00000344566 | C21orf2         | 0.3895 |
| ENSP00000216442 | ATP6V1D         | 0.3895 |
| ENSP00000218008 | ATP1B4          | 0.3895 |
| ENSP00000368062 | ATAD3C          | 0.3895 |
| ENSP00000368767 | ASPH            | 0.3895 |
| ENSP00000320893 | ASB8            | 0.3895 |
| ENSP00000299381 | ANAPC16         | 0.3895 |
| ENSP00000264595 | AGA             | 0.3895 |
| ENSP00000379086 | ADM2            | 0.3895 |
| ENSP00000468389 | AC002398.9      | 0.3895 |
| ENSP00000456021 | ENSG00000260527 | 0.3895 |
| ENSP00000405289 | ZNF778          | 0.3868 |
| ENSP00000155093 | ZFY             | 0.3868 |
| ENSP00000317686 | ZFP42           | 0.3868 |
| ENSP00000413418 | ZFHX2           | 0.3868 |
| ENSP00000349689 | ZDHHC9          | 0.3868 |
| ENSP00000287387 | WDYHV1          | 0.3868 |
| ENSP00000366314 | TRPM3           | 0.3868 |
| ENSP00000363942 | TP53INP2        | 0.3868 |
| ENSP00000245817 | TNFSF9          | 0.3868 |
| ENSP00000363157 | TNFSF15         | 0.3868 |
| ENSP00000363189 | TMEM222         | 0.3868 |
| ENSP00000357804 | THEM4           | 0.3868 |
| ENSP00000366307 | THBD            | 0.3868 |
| ENSP00000306015 | SYNPO2          | 0.3868 |
| ENSP00000312329 | STAG3L3         | 0.3868 |
| ENSP00000368808 | SMPX            | 0.3868 |
| ENSP00000357754 | SMCP            | 0.3868 |
| ENSP00000366942 | SLC36A3         | 0.3868 |
| ENSP00000295777 | SERPINI1        | 0.3868 |
| ENSP00000330631 | RTN4RL1         | 0.3868 |
| ENSP00000262340 | RPE65           | 0.3868 |
| ENSP00000420037 | PIGP            | 0.3868 |
| ENSP00000300658 | PGAP3           | 0.3868 |
| ENSP00000263549 | PARP12          | 0.3868 |

|                 |          |        |
|-----------------|----------|--------|
| ENSP00000203664 | OTUB2    | 0.3868 |
| ENSP00000259396 | ORM1     | 0.3868 |
| ENSP00000436455 | NUCB2    | 0.3868 |
| ENSP00000346890 | NRD1     | 0.3868 |
| ENSP00000366061 | NMS      | 0.3868 |
| ENSP00000246117 | NCLN     | 0.3868 |
| ENSP00000443194 | NAT1     | 0.3868 |
| ENSP00000357360 | MTX1     | 0.3868 |
| ENSP00000265517 | MTTP     | 0.3868 |
| ENSP00000356552 | MR1      | 0.3868 |
| ENSP00000281806 | MCHR2    | 0.3868 |
| ENSP00000262811 | MAST3    | 0.3868 |
| ENSP00000364777 | MAGED4   | 0.3868 |
| ENSP00000305742 | LRTOMT   | 0.3868 |
| ENSP00000300417 | LRSAM1   | 0.3868 |
| ENSP00000400803 | LRRC69   | 0.3868 |
| ENSP00000374447 | LRCH1    | 0.3868 |
| ENSP00000238875 | LGALSL   | 0.3868 |
| ENSP00000371661 | LCORL    | 0.3868 |
| ENSP00000341342 | KLHL6    | 0.3868 |
| ENSP00000359942 | KLHL31   | 0.3868 |
| ENSP00000312814 | KCTD2    | 0.3868 |
| ENSP00000319370 | KCNMB3   | 0.3868 |
| ENSP00000396749 | KANSL3   | 0.3868 |
| ENSP00000369578 | IFNW1    | 0.3868 |
| ENSP00000342513 | IFI6     | 0.3868 |
| ENSP00000305721 | IBTK     | 0.3868 |
| ENSP00000281938 | HSPB8    | 0.3868 |
| ENSP00000366999 | HIST1H3D | 0.3868 |
| ENSP00000362810 | HCRTR1   | 0.3868 |
| ENSP00000349270 | HBM      | 0.3868 |
| ENSP00000359239 | HAUS7    | 0.3868 |
| ENSP00000354723 | H2BFWT   | 0.3868 |
| ENSP00000344260 | GALNT15  | 0.3868 |
| ENSP00000288988 | GALNT14  | 0.3868 |
| ENSP00000353910 | FUT8     | 0.3868 |
| ENSP00000002165 | FUCA2    | 0.3868 |
| ENSP00000351113 | FRYL     | 0.3868 |
| ENSP00000386881 | DYSF     | 0.3868 |
| ENSP00000373691 | DUOX2    | 0.3868 |
| ENSP00000349727 | DOK3     | 0.3868 |
| ENSP00000264057 | DGKD     | 0.3868 |
| ENSP00000387426 | CYHR1    | 0.3868 |
| ENSP00000322316 | COQ7     | 0.3868 |
| ENSP00000289382 | CNOT11   | 0.3868 |
| ENSP00000364831 | CLCNKB   | 0.3868 |
| ENSP00000327179 | CIRH1A   | 0.3868 |
| ENSP00000339723 | CIR1     | 0.3868 |
| ENSP00000341828 | CHIA     | 0.3868 |
| ENSP00000334229 | C2CD5    | 0.3868 |
| ENSP00000260502 | BCAR3    | 0.3868 |
| ENSP00000352319 | ARSF     | 0.3868 |
| ENSP00000306788 | ARL6IP1  | 0.3868 |

|                 |          |        |
|-----------------|----------|--------|
| ENSP00000370521 | AIPL1    | 0.3868 |
| ENSP00000362799 | ACRC     | 0.3868 |
| ENSP00000250974 | ABHD17A  | 0.3868 |
| ENSP00000325634 | ZNF639   | 0.3842 |
| ENSP00000305077 | ZNF439   | 0.3842 |
| ENSP00000300022 | YPEL4    | 0.3842 |
| ENSP00000328079 | WDR53    | 0.3842 |
| ENSP00000251289 | WDR18    | 0.3842 |
| ENSP00000462337 | VEZF1    | 0.3842 |
| ENSP00000396068 | UBR3     | 0.3842 |
| ENSP00000369465 | TXLNG    | 0.3842 |
| ENSP00000386181 | TTC30B   | 0.3842 |
| ENSP00000365924 | TRIM31   | 0.3842 |
| ENSP00000362424 | TRAF3IP1 | 0.3842 |
| ENSP00000223795 | TNFSF8   | 0.3842 |
| ENSP00000433361 | TMEM9B   | 0.3842 |
| ENSP00000300128 | TMEM194A | 0.3842 |
| ENSP00000268674 | TIGD7    | 0.3842 |
| ENSP00000263707 | TFCP2L1  | 0.3842 |
| ENSP00000280358 | TEX12    | 0.3842 |
| ENSP00000331302 | TCEB3B   | 0.3842 |
| ENSP00000371394 | SYT8     | 0.3842 |
| ENSP00000319318 | STAG3    | 0.3842 |
| ENSP00000332931 | SLC8A1   | 0.3842 |
| ENSP00000289952 | SLC39A14 | 0.3842 |
| ENSP00000362285 | SLC29A3  | 0.3842 |
| ENSP00000355141 | SEPN1    | 0.3842 |
| ENSP00000301293 | SEMA6B   | 0.3842 |
| ENSP00000350547 | SEMA4F   | 0.3842 |
| ENSP00000293502 | SDR9C7   | 0.3842 |
| ENSP00000274938 | SCUBE3   | 0.3842 |
| ENSP00000357697 | S100A2   | 0.3842 |
| ENSP00000369257 | RPGRIP1L | 0.3842 |
| ENSP00000360217 | RHAG     | 0.3842 |
| ENSP00000428343 | RGS21    | 0.3842 |
| ENSP00000258062 | REPS1    | 0.3842 |
| ENSP00000262879 | RALGAPB  | 0.3842 |
| ENSP00000311572 | PTGR1    | 0.3842 |
| ENSP00000225573 | PNPO     | 0.3842 |
| ENSP00000317177 | PLD6     | 0.3842 |
| ENSP00000247992 | PLA2G2C  | 0.3842 |
| ENSP00000241041 | PEX16    | 0.3842 |
| ENSP00000297565 | OSR2     | 0.3842 |
| ENSP00000455169 | NETO2    | 0.3842 |
| ENSP00000284503 | NEIL2    | 0.3842 |
| ENSP00000380702 | MYCBP    | 0.3842 |
| ENSP00000362718 | MTCH1    | 0.3842 |
| ENSP00000373261 | MOBP     | 0.3842 |
| ENSP00000298717 | METTL3   | 0.3842 |
| ENSP00000353098 | MCMBP    | 0.3842 |
| ENSP00000363452 | MAN1C1   | 0.3842 |
| ENSP00000364467 | LYZL2    | 0.3842 |
| ENSP00000364650 | LYZL1    | 0.3842 |



|                 |          |        |
|-----------------|----------|--------|
| ENSP00000354575 | LSR      | 0.3842 |
| ENSP00000375857 | LRRFIP1  | 0.3842 |
| ENSP00000240618 | KLRK1    | 0.3842 |
| ENSP00000321475 | KLHL38   | 0.3842 |
| ENSP00000290310 | KCNE2    | 0.3842 |
| ENSP00000395650 | KANK2    | 0.3842 |
| ENSP00000384198 | INO80D   | 0.3842 |
| ENSP00000313661 | HTR1D    | 0.3842 |
| ENSP00000365895 | HS6ST3   | 0.3842 |
| ENSP00000341108 | HMX2     | 0.3842 |
| ENSP00000297440 | HEATR2   | 0.3842 |
| ENSP00000307342 | HCN1     | 0.3842 |
| ENSP00000261208 | HAL      | 0.3842 |
| ENSP00000204679 | GNPTG    | 0.3842 |
| ENSP00000331831 | GAS6     | 0.3842 |
| ENSP00000410732 | GABRG2   | 0.3842 |
| ENSP00000399588 | GAB3     | 0.3842 |
| ENSP00000269097 | G6PC3    | 0.3842 |
| ENSP00000280481 | FREM2    | 0.3842 |
| ENSP00000435061 | FNTA     | 0.3842 |
| ENSP00000335655 | FMNL3    | 0.3842 |
| ENSP00000339912 | FLRT3    | 0.3842 |
| ENSP00000217289 | FERMT1   | 0.3842 |
| ENSP00000326819 | FANCB    | 0.3842 |
| ENSP00000354669 | FAM63A   | 0.3842 |
| ENSP00000410603 | FAM131B  | 0.3842 |
| ENSP00000394352 | DIXDC1   | 0.3842 |
| ENSP00000334801 | DHRS4L2  | 0.3842 |
| ENSP00000380352 | DDHD2    | 0.3842 |
| ENSP00000285979 | CYP2C18  | 0.3842 |
| ENSP00000361628 | CXorf57  | 0.3842 |
| ENSP00000381273 | CRYBB2   | 0.3842 |
| ENSP00000340943 | CRHR2    | 0.3842 |
| ENSP00000383938 | CRELD2   | 0.3842 |
| ENSP00000290776 | CPNE2    | 0.3842 |
| ENSP00000359098 | COX7A2   | 0.3842 |
| ENSP00000299886 | COG1     | 0.3842 |
| ENSP00000314544 | CCZ1B    | 0.3842 |
| ENSP00000240079 | CCDC53   | 0.3842 |
| ENSP00000252729 | CACNG6   | 0.3842 |
| ENSP00000412388 | C9orf172 | 0.3842 |
| ENSP00000379092 | BTC      | 0.3842 |
| ENSP00000354032 | BSCL2    | 0.3842 |
| ENSP00000265523 | BLVRA    | 0.3842 |
| ENSP00000264381 | BCHE     | 0.3842 |
| ENSP00000320965 | B4GALT3  | 0.3842 |
| ENSP00000315568 | AVL9     | 0.3842 |
| ENSP00000351155 | ATL1     | 0.3842 |
| ENSP00000378897 | ASAH2    | 0.3842 |
| ENSP00000335560 | ARHGEF25 | 0.3842 |
| ENSP00000391596 | AMDHD2   | 0.3842 |
| ENSP00000318313 | AMBRA1   | 0.3842 |
| ENSP00000433931 | AIM1L    | 0.3842 |

|                 |               |        |
|-----------------|---------------|--------|
| ENSP00000365251 | AGTPBP1       | 0.3842 |
| ENSP00000358413 | ZDHHC6        | 0.3816 |
| ENSP00000301011 | ZC3H18        | 0.3816 |
| ENSP00000423333 | USP51         | 0.3816 |
| ENSP00000449428 | TWF1          | 0.3816 |
| ENSP00000328875 | TRAK2         | 0.3816 |
| ENSP00000350990 | TNKS1BP1      | 0.3816 |
| ENSP00000308753 | TMOD3         | 0.3816 |
| ENSP00000262817 | TMEM59L       | 0.3816 |
| ENSP00000281017 | TMEM18        | 0.3816 |
| ENSP00000360184 | TM9SF3        | 0.3816 |
| ENSP00000357631 | TCERG1L       | 0.3816 |
| ENSP00000386170 | TBX20         | 0.3816 |
| ENSP00000361731 | TBC1D13       | 0.3816 |
| ENSP00000248121 | SYNGR3        | 0.3816 |
| ENSP00000337926 | SUGP2         | 0.3816 |
| ENSP00000356172 | SOX13         | 0.3816 |
| ENSP00000372482 | SNRNP25       | 0.3816 |
| ENSP00000353791 | SLC6A9        | 0.3816 |
| ENSP00000360967 | SLC6A14       | 0.3816 |
| ENSP00000352702 | SLC6A12       | 0.3816 |
| ENSP00000266579 | SLC38A4       | 0.3816 |
| ENSP00000309504 | SLC26A7       | 0.3816 |
| ENSP00000279027 | SLC13A3       | 0.3816 |
| ENSP00000262866 | SLA2          | 0.3816 |
| ENSP00000390084 | SHISA6        | 0.3816 |
| ENSP00000265965 | SERGEF        | 0.3816 |
| ENSP00000349929 | SDCCAG3       | 0.3816 |
| ENSP00000358374 | SCAF11        | 0.3816 |
| ENSP00000467041 | RP11-322E11.6 | 0.3816 |
| ENSP00000259939 | RNF144B       | 0.3816 |
| ENSP00000377055 | PRCP          | 0.3816 |
| ENSP00000420826 | PRB1          | 0.3816 |
| ENSP00000257905 | PPP1R1A       | 0.3816 |
| ENSP00000322373 | PLEKHF2       | 0.3816 |
| ENSP00000239231 | PANK3         | 0.3816 |
| ENSP00000361558 | NTMT1         | 0.3816 |
| ENSP00000371101 | NOL10         | 0.3816 |
| ENSP00000371577 | MTMR12        | 0.3816 |
| ENSP00000402537 | MTMR10        | 0.3816 |
| ENSP00000377995 | MT1X          | 0.3816 |
| ENSP00000307636 | MORN4         | 0.3816 |
| ENSP00000356859 | MGST3         | 0.3816 |
| ENSP00000264036 | MCAM          | 0.3816 |
| ENSP00000362870 | MATN1         | 0.3816 |
| ENSP00000215739 | LZTR1         | 0.3816 |
| ENSP00000355187 | LRRTM3        | 0.3816 |
| ENSP00000312535 | LRFN4         | 0.3816 |
| ENSP00000357778 | LCE3E         | 0.3816 |
| ENSP00000284669 | KLHL41        | 0.3816 |
| ENSP00000270583 | KLHDC4        | 0.3816 |
| ENSP00000379654 | KIAA0430      | 0.3816 |
| ENSP00000259154 | KCTD3         | 0.3816 |

|                 |            |        |
|-----------------|------------|--------|
| ENSP00000443432 | IDO2       | 0.3816 |
| ENSP00000256906 | HRH4       | 0.3816 |
| ENSP00000263208 | HIRA       | 0.3816 |
| ENSP00000439056 | HAUS5      | 0.3816 |
| ENSP00000329662 | H1FX       | 0.3816 |
| ENSP00000330148 | GRID1      | 0.3816 |
| ENSP00000306449 | GPR37      | 0.3816 |
| ENSP00000366157 | GPR180     | 0.3816 |
| ENSP00000313050 | GBAS       | 0.3816 |
| ENSP00000258201 | FHOD1      | 0.3816 |
| ENSP00000221466 | FCGRT      | 0.3816 |
| ENSP00000369625 | FAM50B     | 0.3816 |
| ENSP00000265840 | ELMOD1     | 0.3816 |
| ENSP00000445626 | EGR4       | 0.3816 |
| ENSP00000353701 | DPP3       | 0.3816 |
| ENSP00000417182 | DPCR1      | 0.3816 |
| ENSP00000261811 | CYSTM1     | 0.3816 |
| ENSP00000373244 | CSPG5      | 0.3816 |
| ENSP00000363590 | CSGALNACT2 | 0.3816 |
| ENSP00000323696 | CRTAP      | 0.3816 |
| ENSP00000265379 | COL6A5     | 0.3816 |
| ENSP00000356133 | CLDN20     | 0.3816 |
| ENSP00000265593 | CLCN2      | 0.3816 |
| ENSP00000269967 | CCDC97     | 0.3816 |
| ENSP00000376177 | CALCRL     | 0.3816 |
| ENSP00000346017 | CALCB      | 0.3816 |
| ENSP00000366030 | C9orf41    | 0.3816 |
| ENSP00000243611 | C4BPB      | 0.3816 |
| ENSP00000356037 | C4BPA      | 0.3816 |
| ENSP00000299578 | C16orf46   | 0.3816 |
| ENSP00000264914 | ARSB       | 0.3816 |
| ENSP00000187397 | ARPP21     | 0.3816 |
| ENSP00000354432 | ANKRD30A   | 0.3816 |
| ENSP00000269701 | AKAP8      | 0.3816 |
| ENSP00000324827 | AKAP17A    | 0.3816 |
| ENSP00000413001 | AGBL1      | 0.3816 |
| ENSP00000453302 | ADAM8      | 0.3816 |
| ENSP00000368109 | ACCSL      | 0.3816 |
| ENSP00000469958 | ZNF626     | 0.3789 |
| ENSP00000340171 | ZNF573     | 0.3789 |
| ENSP00000458062 | ZNF286A    | 0.3789 |
| ENSP00000364220 | VWA5B1     | 0.3789 |
| ENSP00000255304 | USPL1      | 0.3789 |
| ENSP00000372199 | URB1       | 0.3789 |
| ENSP00000356320 | ULBP2      | 0.3789 |
| ENSP00000267938 | UBE2Q2     | 0.3789 |
| ENSP00000292879 | U2AF1L4    | 0.3789 |
| ENSP00000300482 | TRPM2      | 0.3789 |
| ENSP00000326737 | TNFRSF12A  | 0.3789 |
| ENSP00000319992 | TMEM11     | 0.3789 |
| ENSP00000216468 | TMED8      | 0.3789 |
| ENSP00000281030 | THRSP      | 0.3789 |
| ENSP00000304689 | THAP11     | 0.3789 |

|                 |          |        |
|-----------------|----------|--------|
| ENSP00000324323 | TCTEX1D2 | 0.3789 |
| ENSP00000357794 | TCHH     | 0.3789 |
| ENSP00000297239 | SYTL3    | 0.3789 |
| ENSP00000267377 | SSTR1    | 0.3789 |
| ENSP00000457386 | SMIM1    | 0.3789 |
| ENSP00000354107 | SLC6A6   | 0.3789 |
| ENSP00000327943 | SLC5A2   | 0.3789 |
| ENSP00000367950 | SHROOM1  | 0.3789 |
| ENSP00000358853 | SH3BGRL2 | 0.3789 |
| ENSP00000402338 | RPF2     | 0.3789 |
| ENSP00000347548 | RNF220   | 0.3789 |
| ENSP00000217740 | RNF125   | 0.3789 |
| ENSP00000454919 | RNF112   | 0.3789 |
| ENSP00000320623 | RMND5B   | 0.3789 |
| ENSP00000381206 | RDH16    | 0.3789 |
| ENSP00000273968 | PYURF    | 0.3789 |
| ENSP00000446916 | PRSS58   | 0.3789 |
| ENSP00000327386 | PRSS57   | 0.3789 |
| ENSP00000354280 | PRSS3    | 0.3789 |
| ENSP00000275034 | PHIP     | 0.3789 |
| ENSP00000367727 | PANK4    | 0.3789 |
| ENSP00000284292 | NRGN     | 0.3789 |
| ENSP00000311196 | NPAS4    | 0.3789 |
| ENSP00000339958 | NISCH    | 0.3789 |
| ENSP00000371362 | NADKD1   | 0.3789 |
| ENSP00000306997 | MYOZ2    | 0.3789 |
| ENSP00000359417 | MTMR1    | 0.3789 |
| ENSP00000308901 | MRPL45   | 0.3789 |
| ENSP00000199706 | MRPL28   | 0.3789 |
| ENSP00000331664 | MGAT4C   | 0.3789 |
| ENSP00000307077 | METTL18  | 0.3789 |
| ENSP00000370800 | MBD3L2   | 0.3789 |
| ENSP00000355880 | MARC2    | 0.3789 |
| ENSP00000395473 | MAN2B1   | 0.3789 |
| ENSP00000367315 | LRRC10B  | 0.3789 |
| ENSP00000344353 | LPAR6    | 0.3789 |
| ENSP00000355302 | KRTAP1-5 | 0.3789 |
| ENSP00000246635 | KRT13    | 0.3789 |
| ENSP00000242810 | KLHL24   | 0.3789 |
| ENSP00000338013 | KIAA1984 | 0.3789 |
| ENSP00000456200 | IST1     | 0.3789 |
| ENSP00000263379 | IL27RA   | 0.3789 |
| ENSP00000359583 | HPSE2    | 0.3789 |
| ENSP00000390431 | HLA-DQB2 | 0.3789 |
| ENSP00000284562 | GSTA5    | 0.3789 |
| ENSP00000382791 | GRIK1    | 0.3789 |
| ENSP00000389175 | GLYCTK   | 0.3789 |
| ENSP00000309653 | GLIS1    | 0.3789 |
| ENSP00000360060 | FRAT1    | 0.3789 |
| ENSP00000371397 | FAM43A   | 0.3789 |
| ENSP00000300255 | EVA1C    | 0.3789 |
| ENSP00000375073 | EID2     | 0.3789 |
| ENSP00000216733 | EFS      | 0.3789 |

|                 |              |        |
|-----------------|--------------|--------|
| ENSP00000345229 | DNER         | 0.3789 |
| ENSP00000311401 | DENND6A      | 0.3789 |
| ENSP00000358953 | CUEDC2       | 0.3789 |
| ENSP00000310832 | CTSF         | 0.3789 |
| ENSP00000457718 | COG8         | 0.3789 |
| ENSP00000352639 | CELA2A       | 0.3789 |
| ENSP00000261692 | CDK2AP1      | 0.3789 |
| ENSP00000432034 | CCL15-CCL14  | 0.3789 |
| ENSP00000335544 | CCKBR        | 0.3789 |
| ENSP00000366612 | CBWD5        | 0.3789 |
| ENSP00000372955 | C3orf37      | 0.3789 |
| ENSP00000040738 | BOD1L1       | 0.3789 |
| ENSP00000353010 | ATG2B        | 0.3789 |
| ENSP00000225823 | ASIC2        | 0.3789 |
| ENSP00000431391 | API5         | 0.3789 |
| ENSP00000377833 | ANXA4        | 0.3789 |
| ENSP00000159087 | ANO8         | 0.3789 |
| ENSP00000292246 | ANO10        | 0.3789 |
| ENSP00000313670 | ALS2CL       | 0.3789 |
| ENSP00000229243 | ACRBP        | 0.3789 |
| ENSP00000370531 | ACOT6        | 0.3789 |
| ENSP00000294353 | ZYG11B       | 0.3763 |
| ENSP00000252463 | ZSCAN10      | 0.3763 |
| ENSP00000311521 | ZNF490       | 0.3763 |
| ENSP00000367069 | ZFAT         | 0.3763 |
| ENSP00000370616 | ZBED1        | 0.3763 |
| ENSP00000255305 | XPO4         | 0.3763 |
| ENSP00000341819 | VWC2         | 0.3763 |
| ENSP00000383719 | UBE2J2       | 0.3763 |
| ENSP00000346627 | TYW5         | 0.3763 |
| ENSP00000332152 | TRIM52       | 0.3763 |
| ENSP00000451451 | TNFSF12      | 0.3763 |
| ENSP00000386210 | TAS2R40      | 0.3763 |
| ENSP00000300108 | TAC3         | 0.3763 |
| ENSP00000275216 | TAAR1        | 0.3763 |
| ENSP00000355156 | SUCNR1       | 0.3763 |
| ENSP00000321347 | STRBP        | 0.3763 |
| ENSP00000306461 | SPRR1B       | 0.3763 |
| ENSP00000315006 | SLC28A2      | 0.3763 |
| ENSP00000342267 | SLC25A15     | 0.3763 |
| ENSP00000266771 | SLC15A4      | 0.3763 |
| ENSP00000362814 | SERINC2      | 0.3763 |
| ENSP00000005386 | RPAP3        | 0.3763 |
| ENSP00000462747 | RP11-343C2.7 | 0.3763 |
| ENSP00000354571 | RNF121       | 0.3763 |
| ENSP00000293677 | RAVER1       | 0.3763 |
| ENSP00000312837 | RAB11FIP4    | 0.3763 |
| ENSP00000269582 | PNMT         | 0.3763 |
| ENSP00000369785 | PIR          | 0.3763 |
| ENSP00000280350 | PIH1D2       | 0.3763 |
| ENSP00000306670 | NUDT16L1     | 0.3763 |
| ENSP00000290401 | NPTN         | 0.3763 |
| ENSP00000375726 | NOSIP        | 0.3763 |

|                 |           |        |
|-----------------|-----------|--------|
| ENSP00000386134 | NGDN      | 0.3763 |
| ENSP00000300131 | NAB2      | 0.3763 |
| ENSP00000354972 | NAA35     | 0.3763 |
| ENSP00000354772 | MVB12B    | 0.3763 |
| ENSP00000300209 | METTLL21B | 0.3763 |
| ENSP00000363040 | MEGF9     | 0.3763 |
| ENSP00000357624 | MARCKS    | 0.3763 |
| ENSP00000433290 | LTB4R2    | 0.3763 |
| ENSP00000367157 | LRRC3C    | 0.3763 |
| ENSP00000348043 | LRRC20    | 0.3763 |
| ENSP00000297293 | LMTK2     | 0.3763 |
| ENSP00000221973 | LIM2      | 0.3763 |
| ENSP00000383226 | KRTAP10-1 | 0.3763 |
| ENSP00000257974 | KRT82     | 0.3763 |
| ENSP00000295746 | KIAA1524  | 0.3763 |
| ENSP00000434241 | KCNC3     | 0.3763 |
| ENSP00000360806 | KCNB1     | 0.3763 |
| ENSP00000368797 | KBTBD7    | 0.3763 |
| ENSP00000368799 | KBTBD6    | 0.3763 |
| ENSP00000334003 | INTU      | 0.3763 |
| ENSP00000377370 | IGSF11    | 0.3763 |
| ENSP00000319476 | ICOS      | 0.3763 |
| ENSP00000388666 | ICAM2     | 0.3763 |
| ENSP00000289753 | HTR6      | 0.3763 |
| ENSP00000301785 | HNRNPUL2  | 0.3763 |
| ENSP00000385479 | HIST2H3A  | 0.3763 |
| ENSP00000318085 | HINFP     | 0.3763 |
| ENSP00000346450 | H2AFB1    | 0.3763 |
| ENSP00000358851 | GSTM4     | 0.3763 |
| ENSP00000218316 | GPR50     | 0.3763 |
| ENSP00000428824 | GPBAR1    | 0.3763 |
| ENSP00000325775 | GJC3      | 0.3763 |
| ENSP00000359485 | GBP6      | 0.3763 |
| ENSP00000471397 | GBA3      | 0.3763 |
| ENSP00000278919 | FEZ1      | 0.3763 |
| ENSP00000399259 | FCHSD1    | 0.3763 |
| ENSP00000432931 | FAM86B1   | 0.3763 |
| ENSP00000273920 | ENOPH1    | 0.3763 |
| ENSP00000345997 | DMPK      | 0.3763 |
| ENSP00000340935 | DMP1      | 0.3763 |
| ENSP00000235180 | DLGAP3    | 0.3763 |
| ENSP00000260803 | DBR1      | 0.3763 |
| ENSP00000265997 | CPEB3     | 0.3763 |
| ENSP00000297770 | CPA6      | 0.3763 |
| ENSP00000264734 | CLDN16    | 0.3763 |
| ENSP00000357311 | CENPW     | 0.3763 |
| ENSP00000369325 | CDKL5     | 0.3763 |
| ENSP00000249887 | CCRL1     | 0.3763 |
| ENSP00000300213 | CCNDBP1   | 0.3763 |
| ENSP00000366608 | CBWD7     | 0.3763 |
| ENSP00000323339 | C2CD3     | 0.3763 |
| ENSP00000218147 | BCORL1    | 0.3763 |
| ENSP00000263610 | BARHL1    | 0.3763 |

|                 |               |        |
|-----------------|---------------|--------|
| ENSP00000333395 | ARSI          | 0.3763 |
| ENSP00000391490 | AGR2          | 0.3763 |
| ENSP00000265727 | ADAM22        | 0.3763 |
| ENSP00000342216 | ABCA9         | 0.3763 |
| ENSP00000365395 | AADAACL4      | 0.3763 |
| ENSP00000378326 | ZP3           | 0.3737 |
| ENSP00000314709 | ZHX2          | 0.3737 |
| ENSP00000331933 | WSCD2         | 0.3737 |
| ENSP00000263795 | WDR76         | 0.3737 |
| ENSP00000384302 | WDR43         | 0.3737 |
| ENSP00000333799 | WBSCR16       | 0.3737 |
| ENSP00000362105 | UTP11L        | 0.3737 |
| ENSP00000305426 | TUB           | 0.3737 |
| ENSP00000388293 | TSTD1         | 0.3737 |
| ENSP00000011898 | TSPAN9        | 0.3737 |
| ENSP00000332668 | TSKU          | 0.3737 |
| ENSP00000376930 | TMCC1         | 0.3737 |
| ENSP00000360560 | TCTE1         | 0.3737 |
| ENSP00000247883 | TAS2R5        | 0.3737 |
| ENSP00000297325 | SUN3          | 0.3737 |
| ENSP00000302951 | STRA13        | 0.3737 |
| ENSP00000379353 | ST8SIA1       | 0.3737 |
| ENSP00000345849 | SPAM1         | 0.3737 |
| ENSP00000341682 | SLC26A9       | 0.3737 |
| ENSP00000413049 | SLC25A48      | 0.3737 |
| ENSP00000316909 | SLC17A8       | 0.3737 |
| ENSP00000452776 | SLC12A6       | 0.3737 |
| ENSP00000296043 | SHROOM3       | 0.3737 |
| ENSP00000403476 | SH3D21        | 0.3737 |
| ENSP00000443130 | RP11-286N22.8 | 0.3737 |
| ENSP00000259605 | RNF38         | 0.3737 |
| ENSP00000262482 | RNF167        | 0.3737 |
| ENSP00000425840 | RNF150        | 0.3737 |
| ENSP00000367202 | RECK          | 0.3737 |
| ENSP00000245796 | PSD4          | 0.3737 |
| ENSP00000357452 | PMVK          | 0.3737 |
| ENSP00000406933 | NT5DC2        | 0.3737 |
| ENSP00000360530 | NSMF          | 0.3737 |
| ENSP00000366934 | NOL9          | 0.3737 |
| ENSP00000299964 | NNMT          | 0.3737 |
| ENSP00000373411 | NKIRAS1       | 0.3737 |
| ENSP00000296849 | NKD2          | 0.3737 |
| ENSP00000280700 | NGLY1         | 0.3737 |
| ENSP00000424757 | NEK1          | 0.3737 |
| ENSP00000381008 | MUC16         | 0.3737 |
| ENSP00000338487 | MGAT4B        | 0.3737 |
| ENSP00000218439 | MAGED2        | 0.3737 |
| ENSP00000356846 | MAEL          | 0.3737 |
| ENSP00000309689 | LRCH4         | 0.3737 |
| ENSP00000375683 | KLK7          | 0.3737 |
| ENSP00000332791 | KLHL15        | 0.3737 |
| ENSP00000345055 | KCNQ5         | 0.3737 |
| ENSP00000361952 | KCNK15        | 0.3737 |

|                 |                 |        |
|-----------------|-----------------|--------|
| ENSP00000334714 | IGFN1           | 0.3737 |
| ENSP00000353915 | HTR4            | 0.3737 |
| ENSP00000390354 | HS3ST6          | 0.3737 |
| ENSP00000427888 | HS3ST5          | 0.3737 |
| ENSP00000365817 | HLA-E           | 0.3737 |
| ENSP00000308733 | GPR151          | 0.3737 |
| ENSP00000274093 | GLRA3           | 0.3737 |
| ENSP00000324292 | FBF1            | 0.3737 |
| ENSP00000377225 | FAM50A          | 0.3737 |
| ENSP00000374565 | FAM168B         | 0.3737 |
| ENSP00000261488 | ENOX1           | 0.3737 |
| ENSP00000270221 | EMP3            | 0.3737 |
| ENSP00000370889 | DENND1C         | 0.3737 |
| ENSP00000332679 | CYP2A13         | 0.3737 |
| ENSP00000226432 | CWH43           | 0.3737 |
| ENSP00000354294 | CTRB1           | 0.3737 |
| ENSP00000333833 | CMTM4           | 0.3737 |
| ENSP00000317404 | CHST13          | 0.3737 |
| ENSP00000293780 | CHRNE           | 0.3737 |
| ENSP00000338369 | CELA3B          | 0.3737 |
| ENSP00000353942 | CCDC135         | 0.3737 |
| ENSP00000366677 | CBWD6           | 0.3737 |
| ENSP00000279101 | CABLES2         | 0.3737 |
| ENSP00000400815 | C16orf62        | 0.3737 |
| ENSP00000411672 | ATP6V0E2        | 0.3737 |
| ENSP00000370522 | ARSH            | 0.3737 |
| ENSP00000352101 | ANXA8L1         | 0.3737 |
| ENSP00000314048 | ANO2            | 0.3737 |
| ENSP00000280979 | AKAP6           | 0.3737 |
| ENSP00000229583 | ADTRP           | 0.3737 |
| ENSP00000352268 | AADACL3         | 0.3737 |
| ENSP00000348911 | AADACL2         | 0.3737 |
| ENSP00000368732 | DGAT2L7P        | 0.3737 |
| ENSP00000466795 | ENSG00000267149 | 0.3737 |
| ENSP00000276123 | ZNF711          | 0.3711 |
| ENSP00000394757 | ZNF516          | 0.3711 |
| ENSP00000371003 | ZMYND11         | 0.3711 |
| ENSP00000267294 | ZIC5            | 0.3711 |
| ENSP00000270001 | ZFP14           | 0.3711 |
| ENSP00000430497 | ZFHX4           | 0.3711 |
| ENSP00000318222 | ZDHHC22         | 0.3711 |
| ENSP00000404403 | ZBTB22          | 0.3711 |
| ENSP00000263381 | WIZ             | 0.3711 |
| ENSP00000385143 | UNC5D           | 0.3711 |
| ENSP00000155858 | TRPM5           | 0.3711 |
| ENSP00000257909 | TROAP           | 0.3711 |
| ENSP00000285419 | TMEM55A         | 0.3711 |
| ENSP00000214869 | TMED1           | 0.3711 |
| ENSP00000305852 | TM4SF4          | 0.3711 |
| ENSP00000262319 | TELO2           | 0.3711 |
| ENSP00000257264 | TCN1            | 0.3711 |
| ENSP00000310008 | SWSAP1          | 0.3711 |
| ENSP00000361092 | SURF6           | 0.3711 |



|                 |           |        |
|-----------------|-----------|--------|
| ENSP00000169298 | ST6GAL1   | 0.3711 |
| ENSP00000373454 | SRRM3     | 0.3711 |
| ENSP00000361087 | SNCG      | 0.3711 |
| ENSP00000369399 | SLC4A11   | 0.3711 |
| ENSP00000322020 | SLC25A22  | 0.3711 |
| ENSP00000327569 | SLC22A10  | 0.3711 |
| ENSP00000245312 | SLC10A2   | 0.3711 |
| ENSP00000210633 | SEMA4G    | 0.3711 |
| ENSP00000176195 | SCT       | 0.3711 |
| ENSP00000388550 | RNF24     | 0.3711 |
| ENSP00000206262 | RGS17     | 0.3711 |
| ENSP00000344226 | RASSF7    | 0.3711 |
| ENSP00000336616 | RASSF3    | 0.3711 |
| ENSP00000336931 | PNRC1     | 0.3711 |
| ENSP00000266671 | PHLDA1    | 0.3711 |
| ENSP00000227638 | PANX1     | 0.3711 |
| ENSP00000171757 | P2RY10    | 0.3711 |
| ENSP00000359121 | OLFM3     | 0.3711 |
| ENSP00000303686 | NTSR2     | 0.3711 |
| ENSP00000411012 | NSMAF     | 0.3711 |
| ENSP00000389252 | NPNT      | 0.3711 |
| ENSP00000381486 | NOTO      | 0.3711 |
| ENSP00000275820 | NOM1      | 0.3711 |
| ENSP00000262113 | MYOM2     | 0.3711 |
| ENSP00000349298 | MYLIP     | 0.3711 |
| ENSP00000312235 | MUC13     | 0.3711 |
| ENSP00000323527 | MKLN1     | 0.3711 |
| ENSP00000362144 | MCU       | 0.3711 |
| ENSP00000405268 | MBD1      | 0.3711 |
| ENSP00000342188 | LRRIQ4    | 0.3711 |
| ENSP00000405987 | LRRD1     | 0.3711 |
| ENSP00000372959 | LRRC30    | 0.3711 |
| ENSP00000355166 | LRRC10    | 0.3711 |
| ENSP00000428281 | LEPROTL1  | 0.3711 |
| ENSP00000335565 | KRTAP10-8 | 0.3711 |
| ENSP00000391457 | INO80C    | 0.3711 |
| ENSP00000370105 | GTF2H2C   | 0.3711 |
| ENSP00000381129 | GRK4      | 0.3711 |
| ENSP00000329684 | GALR2     | 0.3711 |
| ENSP00000296137 | FYCO1     | 0.3711 |
| ENSP00000289166 | FAM46B    | 0.3711 |
| ENSP00000274024 | FABP2     | 0.3711 |
| ENSP00000382086 | EVPLL     | 0.3711 |
| ENSP00000344758 | ECM2      | 0.3711 |
| ENSP00000357637 | EBF3      | 0.3711 |
| ENSP00000419599 | DPH3      | 0.3711 |
| ENSP00000411010 | DNTTIP2   | 0.3711 |
| ENSP00000284476 | DISP1     | 0.3711 |
| ENSP00000327104 | DDHD1     | 0.3711 |
| ENSP00000357779 | CRCT1     | 0.3711 |
| ENSP00000313854 | CLPTMIL   | 0.3711 |
| ENSP00000398017 | CLDN9     | 0.3711 |
| ENSP00000307297 | CHST14    | 0.3711 |

|                 |               |        |
|-----------------|---------------|--------|
| ENSP00000244336 | CEACAM8       | 0.3711 |
| ENSP00000379176 | CDKL1         | 0.3711 |
| ENSP00000386378 | CD207         | 0.3711 |
| ENSP00000434724 | CCDC90B       | 0.3711 |
| ENSP00000282611 | CATSPER3      | 0.3711 |
| ENSP00000341213 | C20orf24      | 0.3711 |
| ENSP00000266383 | B4GALNT3      | 0.3711 |
| ENSP00000317674 | APOL1         | 0.3711 |
| ENSP00000345767 | ANKRD6        | 0.3711 |
| ENSP00000391950 | ANKRD36       | 0.3711 |
| ENSP00000314879 | ALOXE3        | 0.3711 |
| ENSP00000369858 | ALOX5AP       | 0.3711 |
| ENSP00000292069 | ZNF667        | 0.3684 |
| ENSP00000296091 | ZNF502        | 0.3684 |
| ENSP00000339767 | ZNF433        | 0.3684 |
| ENSP00000356562 | XPR1          | 0.3684 |
| ENSP00000363746 | WDR46         | 0.3684 |
| ENSP00000425375 | USP17L24      | 0.3684 |
| ENSP00000424077 | USP17L23      | 0.3684 |
| ENSP00000423115 | USP17L22      | 0.3684 |
| ENSP00000262376 | UBN1          | 0.3684 |
| ENSP00000317327 | UBASH3A       | 0.3684 |
| ENSP00000361229 | TSPAN14       | 0.3684 |
| ENSP00000312675 | TRIM72        | 0.3684 |
| ENSP00000300747 | TRIM68        | 0.3684 |
| ENSP00000384876 | TRIM66        | 0.3684 |
| ENSP00000321203 | TNIP2         | 0.3684 |
| ENSP00000406885 | TMEM41A       | 0.3684 |
| ENSP00000266025 | TMEM115       | 0.3684 |
| ENSP00000231198 | THG1L         | 0.3684 |
| ENSP00000328232 | TCEB3C        | 0.3684 |
| ENSP00000273980 | TBCK          | 0.3684 |
| ENSP00000225525 | TAX1BP3       | 0.3684 |
| ENSP00000324302 | STXBP6        | 0.3684 |
| ENSP00000261866 | SPG11         | 0.3684 |
| ENSP00000355721 | SNAP47        | 0.3684 |
| ENSP00000366586 | SLC39A12      | 0.3684 |
| ENSP00000365413 | SLC28A3       | 0.3684 |
| ENSP00000381782 | SLC25A45      | 0.3684 |
| ENSP00000307443 | SLC22A25      | 0.3684 |
| ENSP00000221742 | SLC1A6        | 0.3684 |
| ENSP00000392411 | SLC13A2       | 0.3684 |
| ENSP00000357036 | SLAMF6        | 0.3684 |
| ENSP00000265195 | SIL1          | 0.3684 |
| ENSP00000455510 | SIGLEC5       | 0.3684 |
| ENSP00000270792 | SH3BGRL3      | 0.3684 |
| ENSP00000224807 | SFXN3         | 0.3684 |
| ENSP00000348596 | SDAD1         | 0.3684 |
| ENSP00000450554 | RP11-1012A1.4 | 0.3684 |
| ENSP00000281722 | RBM46         | 0.3684 |
| ENSP00000354608 | PPT2          | 0.3684 |
| ENSP00000299492 | PPFIBP2       | 0.3684 |
| ENSP00000296333 | PIGX          | 0.3684 |

|                 |          |        |
|-----------------|----------|--------|
| ENSP00000216452 | PIGH     | 0.3684 |
| ENSP00000322532 | PELI3    | 0.3684 |
| ENSP00000362186 | PCDH11X  | 0.3684 |
| ENSP00000363414 | PAQR7    | 0.3684 |
| ENSP00000381049 | NSG1     | 0.3684 |
| ENSP00000367752 | NRSN1    | 0.3684 |
| ENSP00000233840 | NEU2     | 0.3684 |
| ENSP00000366326 | NEBL     | 0.3684 |
| ENSP00000324810 | MVB12A   | 0.3684 |
| ENSP00000264198 | MUL1     | 0.3684 |
| ENSP00000384651 | MTMR3    | 0.3684 |
| ENSP00000337816 | MMP25    | 0.3684 |
| ENSP00000260228 | MMP20    | 0.3684 |
| ENSP00000331787 | METTL7A  | 0.3684 |
| ENSP00000314196 | MBOAT4   | 0.3684 |
| ENSP00000318916 | MARCO    | 0.3684 |
| ENSP00000354660 | MAGEC2   | 0.3684 |
| ENSP00000225972 | LRRC59   | 0.3684 |
| ENSP00000360104 | LEPROT   | 0.3684 |
| ENSP00000252245 | KRT75    | 0.3684 |
| ENSP00000341549 | KLHL33   | 0.3684 |
| ENSP00000359392 | KHDC3L   | 0.3684 |
| ENSP00000398410 | KDM8     | 0.3684 |
| ENSP00000358802 | KCNC4    | 0.3684 |
| ENSP00000221444 | KCNA7    | 0.3684 |
| ENSP00000415436 | KANSL2   | 0.3684 |
| ENSP00000360195 | KANK4    | 0.3684 |
| ENSP00000365351 | ITGBL1   | 0.3684 |
| ENSP00000173527 | ISOC1    | 0.3684 |
| ENSP00000310111 | HSPB7    | 0.3684 |
| ENSP00000363794 | HSD17B8  | 0.3684 |
| ENSP00000329554 | HIST1H3I | 0.3684 |
| ENSP00000264553 | GZMM     | 0.3684 |
| ENSP00000231009 | GZMK     | 0.3684 |
| ENSP00000386772 | GPATCH11 | 0.3684 |
| ENSP00000359795 | GIPC2    | 0.3684 |
| ENSP00000359329 | GABRQ    | 0.3684 |
| ENSP00000260282 | FXVD6    | 0.3684 |
| ENSP00000283309 | FRMD1    | 0.3684 |
| ENSP00000358391 | FCGR1B   | 0.3684 |
| ENSP00000352182 | FAM86C1  | 0.3684 |
| ENSP00000372112 | FAHD1    | 0.3684 |
| ENSP00000355028 | DZIP3    | 0.3684 |
| ENSP00000308695 | DPY19L1  | 0.3684 |
| ENSP00000260247 | DCUN1D5  | 0.3684 |
| ENSP00000215939 | CRYBB1   | 0.3684 |
| ENSP00000382356 | COL28A1  | 0.3684 |
| ENSP00000254868 | CLEC10A  | 0.3684 |
| ENSP00000299339 | CLDN10   | 0.3684 |
| ENSP00000304290 | CHRN1    | 0.3684 |
| ENSP00000356198 | CHIT1    | 0.3684 |
| ENSP00000368244 | CHGB     | 0.3684 |
| ENSP00000410815 | CFB      | 0.3684 |

|                 |          |        |
|-----------------|----------|--------|
| ENSP00000351684 | CAMSAP2  | 0.3684 |
| ENSP00000406598 | C4orf27  | 0.3684 |
| ENSP00000270233 | BCAM     | 0.3684 |
| ENSP00000366748 | AUP1     | 0.3684 |
| ENSP00000228468 | ASIC1    | 0.3684 |
| ENSP00000369346 | ARSK     | 0.3684 |
| ENSP00000398637 | ARL13A   | 0.3684 |
| ENSP00000365081 | APOM     | 0.3684 |
| ENSP00000338260 | APOL4    | 0.3684 |
| ENSP00000229304 | APOBEC1  | 0.3684 |
| ENSP00000305464 | APLN     | 0.3684 |
| ENSP00000225410 | ZNHIT3   | 0.3658 |
| ENSP00000411084 | ZNF799   | 0.3658 |
| ENSP00000325326 | ZNF335   | 0.3658 |
| ENSP00000343443 | ZNF107   | 0.3658 |
| ENSP00000351052 | ZC3HC1   | 0.3658 |
| ENSP00000242351 | ZC3HAV1  | 0.3658 |
| ENSP00000238831 | YIPF4    | 0.3658 |
| ENSP00000384792 | WDR62    | 0.3658 |
| ENSP00000346986 | WAC      | 0.3658 |
| ENSP00000363506 | UQCC     | 0.3658 |
| ENSP00000284551 | TRIM11   | 0.3658 |
| ENSP00000373979 | TRAPPC9  | 0.3658 |
| ENSP00000439594 | THEMIS   | 0.3658 |
| ENSP00000337353 | TDP1     | 0.3658 |
| ENSP00000348813 | TBC1D7   | 0.3658 |
| ENSP00000263233 | SYP      | 0.3658 |
| ENSP00000336775 | SYNM     | 0.3658 |
| ENSP00000319622 | SULT1C2  | 0.3658 |
| ENSP00000262915 | ST3GAL3  | 0.3658 |
| ENSP00000204566 | SPG21    | 0.3658 |
| ENSP00000378418 | SP9      | 0.3658 |
| ENSP00000219833 | SLC6A2   | 0.3658 |
| ENSP00000457733 | SLC25A24 | 0.3658 |
| ENSP00000343248 | SBK1     | 0.3658 |
| ENSP00000369292 | SAMD9    | 0.3658 |
| ENSP00000361238 | RSPH9    | 0.3658 |
| ENSP00000325941 | RIC8A    | 0.3658 |
| ENSP00000377075 | RGL3     | 0.3658 |
| ENSP00000345144 | RCBTB2   | 0.3658 |
| ENSP00000296859 | RAPGEF6  | 0.3658 |
| ENSP00000281243 | QDPR     | 0.3658 |
| ENSP00000326598 | PRSS50   | 0.3658 |
| ENSP00000295619 | PROK2    | 0.3658 |
| ENSP00000313070 | PIIP5K2  | 0.3658 |
| ENSP00000322304 | PORCN    | 0.3658 |
| ENSP00000262043 | PHF3     | 0.3658 |
| ENSP00000313377 | PANK2    | 0.3658 |
| ENSP00000448689 | MAP3K12  | 0.3658 |
| ENSP00000276344 | MAGEA4   | 0.3658 |
| ENSP00000328737 | LYPD4    | 0.3658 |
| ENSP00000414670 | LMOD3    | 0.3658 |
| ENSP00000261893 | LACTB    | 0.3658 |

|                 |            |        |
|-----------------|------------|--------|
| ENSP00000366955 | KRTAP4-2   | 0.3658 |
| ENSP00000418018 | IFNE       | 0.3658 |
| ENSP00000002596 | HS3ST1     | 0.3658 |
| ENSP00000334876 | GRK1       | 0.3658 |
| ENSP00000218075 | GLRA2      | 0.3658 |
| ENSP00000295454 | GABRB1     | 0.3658 |
| ENSP00000344254 | FXYD5      | 0.3658 |
| ENSP00000360262 | FGGY       | 0.3658 |
| ENSP00000264658 | FBXL20     | 0.3658 |
| ENSP00000346874 | FAR1       | 0.3658 |
| ENSP00000282633 | FAM21A     | 0.3658 |
| ENSP00000329735 | FAM212A    | 0.3658 |
| ENSP00000284486 | FAM167A    | 0.3658 |
| ENSP00000263713 | EPB41L5    | 0.3658 |
| ENSP00000359520 | ENTPD7     | 0.3658 |
| ENSP00000344937 | DPY19L3    | 0.3658 |
| ENSP00000230431 | DNPH1      | 0.3658 |
| ENSP00000357905 | DMBT1      | 0.3658 |
| ENSP00000310891 | CSGALNACT1 | 0.3658 |
| ENSP00000305725 | CHST11     | 0.3658 |
| ENSP00000304782 | CES3       | 0.3658 |
| ENSP00000430897 | CCDC71L    | 0.3658 |
| ENSP00000425493 | CAGE1      | 0.3658 |
| ENSP00000424363 | BBS5       | 0.3658 |
| ENSP00000312326 | AOC3       | 0.3658 |
| ENSP00000295453 | ALPPL2     | 0.3658 |
| ENSP00000378161 | ACYP2      | 0.3658 |
| ENSP00000355529 | ZP4        | 0.3632 |
| ENSP00000345479 | ZNF587     | 0.3632 |
| ENSP00000347648 | ZNF512     | 0.3632 |
| ENSP00000359740 | ZNF451     | 0.3632 |
| ENSP00000407262 | ZNF138     | 0.3632 |
| ENSP00000344162 | ZNF136     | 0.3632 |
| ENSP00000332013 | ZGPAT      | 0.3632 |
| ENSP00000291900 | ZER1       | 0.3632 |
| ENSP00000328326 | XKR4       | 0.3632 |
| ENSP00000295121 | WDR92      | 0.3632 |
| ENSP00000398688 | VWA5B2     | 0.3632 |
| ENSP00000323516 | UTS2R      | 0.3632 |
| ENSP00000423777 | USP17L28   | 0.3632 |
| ENSP00000296099 | UCN        | 0.3632 |
| ENSP00000324318 | TRAPPC12   | 0.3632 |
| ENSP00000381856 | TOMM6      | 0.3632 |
| ENSP00000335094 | TMEM17     | 0.3632 |
| ENSP00000335595 | TCP11L1    | 0.3632 |
| ENSP00000455444 | TCF24      | 0.3632 |
| ENSP00000295367 | SPRR3      | 0.3632 |
| ENSP00000369887 | SLTM       | 0.3632 |
| ENSP00000297524 | SLC7A13    | 0.3632 |
| ENSP00000268099 | SCAMP2     | 0.3632 |
| ENSP00000338556 | RSPH10B    | 0.3632 |
| ENSP00000258098 | RAB11FIP5  | 0.3632 |
| ENSP00000386385 | PXMP4      | 0.3632 |

|                 |           |        |
|-----------------|-----------|--------|
| ENSP00000368666 | PTCHD1    | 0.3632 |
| ENSP00000413405 | PIGZ      | 0.3632 |
| ENSP00000330658 | PAPPA     | 0.3632 |
| ENSP00000337862 | OVOL1     | 0.3632 |
| ENSP00000252854 | OLFM1     | 0.3632 |
| ENSP00000270235 | NTN5      | 0.3632 |
| ENSP00000358272 | NDUFAF4   | 0.3632 |
| ENSP00000320886 | MLXIPL    | 0.3632 |
| ENSP00000267984 | MESDC1    | 0.3632 |
| ENSP00000286307 | LSM11     | 0.3632 |
| ENSP00000367888 | LRP4      | 0.3632 |
| ENSP00000346442 | LRMP      | 0.3632 |
| ENSP00000362398 | LPAR4     | 0.3632 |
| ENSP00000373783 | LOXL2     | 0.3632 |
| ENSP00000411932 | LMOD2     | 0.3632 |
| ENSP00000316881 | LEPREL1   | 0.3632 |
| ENSP00000371595 | KRTAP5-6  | 0.3632 |
| ENSP00000383223 | KRTAP10-5 | 0.3632 |
| ENSP00000373648 | KCNQ3     | 0.3632 |
| ENSP00000430846 | KCNB2     | 0.3632 |
| ENSP00000375691 | JOSD2     | 0.3632 |
| ENSP00000369962 | IGSF5     | 0.3632 |
| ENSP00000359940 | IGSF1     | 0.3632 |
| ENSP00000390020 | HLA-DOB   | 0.3632 |
| ENSP00000241337 | GSTM2     | 0.3632 |
| ENSP00000245983 | GNRH2     | 0.3632 |
| ENSP00000223528 | FKTN      | 0.3632 |
| ENSP00000360871 | FCN1      | 0.3632 |
| ENSP00000338050 | DTX3      | 0.3632 |
| ENSP00000445366 | DND1      | 0.3632 |
| ENSP00000352928 | DDA1      | 0.3632 |
| ENSP00000215855 | CRYBB3    | 0.3632 |
| ENSP00000238892 | CRIP1     | 0.3632 |
| ENSP00000339157 | CPM       | 0.3632 |
| ENSP00000261340 | CLEC2D    | 0.3632 |
| ENSP00000332771 | CLCNKA    | 0.3632 |
| ENSP00000351118 | CDHR5     | 0.3632 |
| ENSP00000308117 | CD248     | 0.3632 |
| ENSP00000216029 | CBY1      | 0.3632 |
| ENSP00000371037 | CATSPERD  | 0.3632 |
| ENSP00000333283 | C17orf70  | 0.3632 |
| ENSP00000338990 | C12orf44  | 0.3632 |
| ENSP00000355195 | ASB12     | 0.3632 |
| ENSP00000468236 | APOC4     | 0.3632 |
| ENSP00000215941 | ANKRD54   | 0.3632 |
| ENSP00000267116 | ANKRD52   | 0.3632 |
| ENSP00000227618 | ANAPC15   | 0.3632 |
| ENSP00000336693 | ABHD12B   | 0.3632 |
| ENSP00000270459 | ZNF787    | 0.3605 |
| ENSP00000252797 | ZNF764    | 0.3605 |
| ENSP00000294753 | ZNF496    | 0.3605 |
| ENSP00000277225 | ZNF462    | 0.3605 |
| ENSP00000276816 | ZNF16     | 0.3605 |

|                 |          |        |
|-----------------|----------|--------|
| ENSP00000292176 | ZBTB7B   | 0.3605 |
| ENSP00000072644 | YIPF1    | 0.3605 |
| ENSP00000288912 | WDR66    | 0.3605 |
| ENSP00000234392 | VAX2     | 0.3605 |
| ENSP00000333376 | USP45    | 0.3605 |
| ENSP00000422969 | USP17L29 | 0.3605 |
| ENSP00000423211 | USP17L27 | 0.3605 |
| ENSP00000427366 | USP17L26 | 0.3605 |
| ENSP00000422097 | USP17L25 | 0.3605 |
| ENSP00000441024 | UBAP1    | 0.3605 |
| ENSP00000007390 | TSR3     | 0.3605 |
| ENSP00000323926 | TRPM8    | 0.3605 |
| ENSP00000381184 | TMEM231  | 0.3605 |
| ENSP00000379531 | TMC5     | 0.3605 |
| ENSP00000362332 | TFAP2E   | 0.3605 |
| ENSP00000403954 | TENM1    | 0.3605 |
| ENSP00000404923 | TECPR1   | 0.3605 |
| ENSP00000377700 | TBC1D23  | 0.3605 |
| ENSP00000228567 | SYT10    | 0.3605 |
| ENSP00000377789 | SYNPO    | 0.3605 |
| ENSP00000337446 | STARD3   | 0.3605 |
| ENSP00000227495 | ST3GAL4  | 0.3605 |
| ENSP00000299084 | SPRED1   | 0.3605 |
| ENSP00000317332 | SNX18    | 0.3605 |
| ENSP00000269187 | SLC39A6  | 0.3605 |
| ENSP00000301305 | SLC39A4  | 0.3605 |
| ENSP00000313740 | SLC38A5  | 0.3605 |
| ENSP00000355353 | SLC34A3  | 0.3605 |
| ENSP00000454014 | SHISA9   | 0.3605 |
| ENSP00000332204 | SEMA4B   | 0.3605 |
| ENSP00000386796 | SCN7A    | 0.3605 |
| ENSP00000355387 | SCAMP5   | 0.3605 |
| ENSP00000362555 | RNF19B   | 0.3605 |
| ENSP00000391564 | RIMBP3   | 0.3605 |
| ENSP00000444196 | RIBC2    | 0.3605 |
| ENSP00000326170 | RFFL     | 0.3605 |
| ENSP00000261336 | PZP      | 0.3605 |
| ENSP00000217270 | PROKR2   | 0.3605 |
| ENSP00000358232 | PNLIPRP3 | 0.3605 |
| ENSP00000425556 | PALLD    | 0.3605 |
| ENSP00000367462 | OLAH     | 0.3605 |
| ENSP00000380450 | NOXO1    | 0.3605 |
| ENSP00000337618 | NIPA2    | 0.3605 |
| ENSP00000348394 | NCDN     | 0.3605 |
| ENSP00000362869 | MORN5    | 0.3605 |
| ENSP00000215862 | MORC2    | 0.3605 |
| ENSP00000370611 | MIER3    | 0.3605 |
| ENSP00000281923 | MGAT5    | 0.3605 |
| ENSP00000257724 | MDFIC    | 0.3605 |
| ENSP00000264079 | MCOLN1   | 0.3605 |
| ENSP00000360645 | MAN1B1   | 0.3605 |
| ENSP00000354912 | MAGEE1   | 0.3605 |
| ENSP00000363638 | LYPLA2   | 0.3605 |

|                 |          |        |
|-----------------|----------|--------|
| ENSP00000414635 | LRRC34   | 0.3605 |
| ENSP00000359557 | LDOC1    | 0.3605 |
| ENSP00000360411 | LDLRAD1  | 0.3605 |
| ENSP00000385597 | IQCE     | 0.3605 |
| ENSP00000363046 | IPMK     | 0.3605 |
| ENSP00000412457 | HLA-DMB  | 0.3605 |
| ENSP00000346509 | H2AFB2   | 0.3605 |
| ENSP00000315070 | GJD4     | 0.3605 |
| ENSP00000260118 | GGH      | 0.3605 |
| ENSP00000269195 | GALNT1   | 0.3605 |
| ENSP00000343314 | FXYD1    | 0.3605 |
| ENSP00000302599 | FUT9     | 0.3605 |
| ENSP00000357594 | FAM26F   | 0.3605 |
| ENSP00000247270 | EVI2A    | 0.3605 |
| ENSP00000264059 | EFHD1    | 0.3605 |
| ENSP00000360107 | EFHC1    | 0.3605 |
| ENSP00000295824 | EFHB     | 0.3605 |
| ENSP00000320813 | DEFB104A | 0.3605 |
| ENSP00000303963 | CTRB2    | 0.3605 |
| ENSP00000326052 | COX14    | 0.3605 |
| ENSP00000363596 | CNR2     | 0.3605 |
| ENSP00000296387 | CLDN19   | 0.3605 |
| ENSP00000290913 | CHCHD6   | 0.3605 |
| ENSP00000304250 | CDK5R2   | 0.3605 |
| ENSP00000301458 | CD320    | 0.3605 |
| ENSP00000316237 | CCDC102B | 0.3605 |
| ENSP00000366221 | CASZ1    | 0.3605 |
| ENSP00000367808 | C1orf86  | 0.3605 |
| ENSP00000228136 | C11orf58 | 0.3605 |
| ENSP00000326340 | ATG16L2  | 0.3605 |
| ENSP00000276569 | ARMC1    | 0.3605 |
| ENSP00000272217 | ARL8A    | 0.3605 |
| ENSP00000367355 | ARHGEF35 | 0.3605 |
| ENSP00000347454 | ANO1     | 0.3605 |
| ENSP00000449629 | ANKS1B   | 0.3605 |
| ENSP00000257787 | AKIRIN2  | 0.3605 |
| ENSP00000378430 | TMSB4XP4 | 0.3605 |
| ENSP00000240499 | ZNF141   | 0.3579 |
| ENSP00000231749 | ZMYND10  | 0.3579 |
| ENSP00000261683 | ZBTB25   | 0.3579 |
| ENSP00000017003 | XYLT2    | 0.3579 |
| ENSP00000311184 | WFIKKN2  | 0.3579 |
| ENSP00000363869 | VSIG4    | 0.3579 |
| ENSP00000373873 | UNKL     | 0.3579 |
| ENSP00000341045 | UGT2B15  | 0.3579 |
| ENSP00000251566 | UGT2A3   | 0.3579 |
| ENSP00000418648 | UBN2     | 0.3579 |
| ENSP00000419279 | TTC26    | 0.3579 |
| ENSP00000369440 | TRIM6    | 0.3579 |
| ENSP00000290942 | TPPP3    | 0.3579 |
| ENSP00000386292 | TMEM194B | 0.3579 |
| ENSP00000327724 | TAS2R60  | 0.3579 |
| ENSP00000327124 | SMCR7L   | 0.3579 |



|                 |              |        |
|-----------------|--------------|--------|
| ENSP00000405812 | SLC4A8       | 0.3579 |
| ENSP00000386272 | SLC38A11     | 0.3579 |
| ENSP00000222345 | SIPA1L3      | 0.3579 |
| ENSP00000333656 | SIGIRR       | 0.3579 |
| ENSP00000268231 | SEPT12       | 0.3579 |
| ENSP00000357861 | SELENBP1     | 0.3579 |
| ENSP00000456615 | RP11-697E2.6 | 0.3579 |
| ENSP00000361857 | RLF          | 0.3579 |
| ENSP00000354884 | RASSF9       | 0.3579 |
| ENSP00000409279 | OTUD4        | 0.3579 |
| ENSP00000264833 | OLFM2        | 0.3579 |
| ENSP00000285402 | ODF1         | 0.3579 |
| ENSP00000326858 | NT5DC1       | 0.3579 |
| ENSP00000267425 | NOP9         | 0.3579 |
| ENSP00000292431 | NACC1        | 0.3579 |
| ENSP00000416753 | MUC15        | 0.3579 |
| ENSP00000385610 | MEX3C        | 0.3579 |
| ENSP00000314901 | LRRN1        | 0.3579 |
| ENSP00000260061 | LRRC32       | 0.3579 |
| ENSP00000360597 | LRRC26       | 0.3579 |
| ENSP00000334644 | LCE3C        | 0.3579 |
| ENSP00000349923 | LAGE3        | 0.3579 |
| ENSP00000320936 | IL17RA       | 0.3579 |
| ENSP00000229829 | HLA-DOA      | 0.3579 |
| ENSP00000369018 | GPR56        | 0.3579 |
| ENSP00000220940 | GML          | 0.3579 |
| ENSP00000315835 | GALNT11      | 0.3579 |
| ENSP00000412673 | GABRR1       | 0.3579 |
| ENSP00000023897 | GABRA1       | 0.3579 |
| ENSP00000252675 | FUT5         | 0.3579 |
| ENSP00000367284 | FUNDC1       | 0.3579 |
| ENSP00000270509 | FBN3         | 0.3579 |
| ENSP00000318298 | FAM46A       | 0.3579 |
| ENSP00000422131 | FAM193B      | 0.3579 |
| ENSP00000250263 | ERI1         | 0.3579 |
| ENSP00000272444 | DUSP11       | 0.3579 |
| ENSP00000315659 | DNMBP        | 0.3579 |
| ENSP00000293371 | DCD          | 0.3579 |
| ENSP00000369592 | CCDC85C      | 0.3579 |
| ENSP00000380679 | CCDC40       | 0.3579 |
| ENSP00000219299 | CCDC113      | 0.3579 |
| ENSP00000285381 | CA3          | 0.3579 |
| ENSP00000328277 | B4GALNT4     | 0.3579 |
| ENSP00000309096 | B3GNT1       | 0.3579 |
| ENSP00000274361 | ANKRD31      | 0.3579 |
| ENSP00000296721 | AFAP1L1      | 0.3579 |
| ENSP00000366527 | ZSCAN16      | 0.3553 |
| ENSP00000337475 | ZDHHC4       | 0.3553 |
| ENSP00000266529 | ZCRB1        | 0.3553 |
| ENSP00000356375 | ZBTB41       | 0.3553 |
| ENSP00000219454 | WFDC1        | 0.3553 |
| ENSP00000422887 | USP17L30     | 0.3553 |
| ENSP00000422216 | USP17L21     | 0.3553 |

|                 |          |        |
|-----------------|----------|--------|
| ENSP00000427264 | USP17L20 | 0.3553 |
| ENSP00000422621 | USP17L17 | 0.3553 |
| ENSP00000229708 | ULBP1    | 0.3553 |
| ENSP00000364293 | TSR2     | 0.3553 |
| ENSP00000222747 | TSPAN12  | 0.3553 |
| ENSP00000297994 | TRMT10B  | 0.3553 |
| ENSP00000326063 | TMEM39A  | 0.3553 |
| ENSP00000240361 | TEX14    | 0.3553 |
| ENSP00000341346 | TEKT1    | 0.3553 |
| ENSP00000352510 | TECPR2   | 0.3553 |
| ENSP00000263635 | TANC1    | 0.3553 |
| ENSP00000356848 | TADA1    | 0.3553 |
| ENSP00000360269 | TACSTD2  | 0.3553 |
| ENSP00000296632 | STARD4   | 0.3553 |
| ENSP00000255008 | SSTR4    | 0.3553 |
| ENSP00000397911 | SP140L   | 0.3553 |
| ENSP00000326603 | SMCHD1   | 0.3553 |
| ENSP00000326693 | SLC25A42 | 0.3553 |
| ENSP00000297282 | SLC13A4  | 0.3553 |
| ENSP00000231721 | SEMA3G   | 0.3553 |
| ENSP00000371800 | RNF215   | 0.3553 |
| ENSP00000005995 | PRSS21   | 0.3553 |
| ENSP00000412064 | PRR13    | 0.3553 |
| ENSP00000365570 | PRAF2    | 0.3553 |
| ENSP00000290294 | PRAC     | 0.3553 |
| ENSP00000339613 | POFUT2   | 0.3553 |
| ENSP00000347560 | PLEKHA5  | 0.3553 |
| ENSP00000322579 | PHF23    | 0.3553 |
| ENSP00000253812 | PCDHGA3  | 0.3553 |
| ENSP00000295290 | PACRGL   | 0.3553 |
| ENSP00000272223 | OSR1     | 0.3553 |
| ENSP00000355512 | OPN3     | 0.3553 |
| ENSP00000325868 | ODF3     | 0.3553 |
| ENSP00000302648 | NRTN     | 0.3553 |
| ENSP00000232501 | NPRL2    | 0.3553 |
| ENSP00000289547 | NPC1L1   | 0.3553 |
| ENSP00000277554 | NACC2    | 0.3553 |
| ENSP00000338389 | MRPL35   | 0.3553 |
| ENSP00000367792 | MORN1    | 0.3553 |
| ENSP00000311888 | MGAT1    | 0.3553 |
| ENSP00000314543 | MAGEB18  | 0.3553 |
| ENSP00000355895 | LYPLAL1  | 0.3553 |
| ENSP00000253193 | LRP3     | 0.3553 |
| ENSP00000298119 | LRFN5    | 0.3553 |
| ENSP00000313571 | LGALS7B  | 0.3553 |
| ENSP00000343490 | LCTL     | 0.3553 |
| ENSP00000371327 | KLRC2    | 0.3553 |
| ENSP00000454657 | KIAA0391 | 0.3553 |
| ENSP00000258111 | KCNMB4   | 0.3553 |
| ENSP00000302166 | KCNK9    | 0.3553 |
| ENSP00000341479 | KCNJ14   | 0.3553 |
| ENSP00000328923 | KANK3    | 0.3553 |
| ENSP00000321724 | INSL3    | 0.3553 |

|                 |               |        |
|-----------------|---------------|--------|
| ENSP00000246532 | IGFLR1        | 0.3553 |
| ENSP00000359579 | HS2ST1        | 0.3553 |
| ENSP00000360299 | GPR110        | 0.3553 |
| ENSP00000301671 | GHDC          | 0.3553 |
| ENSP00000252318 | GALNT8        | 0.3553 |
| ENSP00000452885 | FAM63B        | 0.3553 |
| ENSP00000348852 | FAM168A       | 0.3553 |
| ENSP00000420608 | EMC1          | 0.3553 |
| ENSP00000367815 | DNAAF1        | 0.3553 |
| ENSP00000220812 | DKK4          | 0.3553 |
| ENSP00000215773 | DDT           | 0.3553 |
| ENSP00000414904 | CTSO          | 0.3553 |
| ENSP00000438400 | CLDN24        | 0.3553 |
| ENSP00000349954 | CGB           | 0.3553 |
| ENSP00000312367 | CD84          | 0.3553 |
| ENSP00000378167 | CCDC66        | 0.3553 |
| ENSP00000307666 | CCDC132       | 0.3553 |
| ENSP00000314407 | CA8           | 0.3553 |
| ENSP00000431184 | C6orf141      | 0.3553 |
| ENSP00000290390 | C2orf81       | 0.3553 |
| ENSP00000420959 | C2orf15       | 0.3553 |
| ENSP00000381132 | C12orf66      | 0.3553 |
| ENSP00000252934 | ATXN10        | 0.3553 |
| ENSP00000469019 | ASCL5         | 0.3553 |
| ENSP00000296525 | ASB5          | 0.3553 |
| ENSP00000253332 | AKAP12        | 0.3553 |
| ENSP00000362273 | ADPRHL2       | 0.3553 |
| ENSP00000270328 | ADAMTS10      | 0.3553 |
| ENSP00000419512 | BTNL2         | 0.3553 |
| ENSP00000425257 | hCG 33128     | 0.3553 |
| ENSP00000379702 | ZNF665        | 0.3526 |
| ENSP00000311319 | ZNF417        | 0.3526 |
| ENSP00000296326 | ZDHHC19       | 0.3526 |
| ENSP00000359364 | YTHDF1        | 0.3526 |
| ENSP00000425582 | USP17L19      | 0.3526 |
| ENSP00000423503 | USP17L18      | 0.3526 |
| ENSP00000410621 | USP17L15      | 0.3526 |
| ENSP00000390759 | USP17L13      | 0.3526 |
| ENSP00000389443 | USP17L12      | 0.3526 |
| ENSP00000400880 | USP17L11      | 0.3526 |
| ENSP00000355437 | TRIM58        | 0.3526 |
| ENSP00000230099 | TRIM38        | 0.3526 |
| ENSP00000365884 | TRIM15        | 0.3526 |
| ENSP00000263663 | TAF1B         | 0.3526 |
| ENSP00000268164 | ST8SIA2       | 0.3526 |
| ENSP00000300917 | SMG8          | 0.3526 |
| ENSP00000286749 | SLC28A1       | 0.3526 |
| ENSP00000329452 | SLC25A21      | 0.3526 |
| ENSP00000244527 | SLC17A1       | 0.3526 |
| ENSP00000215727 | SERPIND1      | 0.3526 |
| ENSP00000337133 | SERPINA9      | 0.3526 |
| ENSP00000329008 | S100A7A       | 0.3526 |
| ENSP00000421307 | RP11-455G16.1 | 0.3526 |

|                 |            |        |
|-----------------|------------|--------|
| ENSP00000269391 | RNF157     | 0.3526 |
| ENSP00000328325 | PTTG1IP    | 0.3526 |
| ENSP00000275072 | PM20D2     | 0.3526 |
| ENSP00000337757 | PIH1D3     | 0.3526 |
| ENSP00000282096 | PDE3B      | 0.3526 |
| ENSP00000259467 | PDCL       | 0.3526 |
| ENSP00000338330 | PAQR6      | 0.3526 |
| ENSP00000341422 | P4HTM      | 0.3526 |
| ENSP00000342535 | NLGN4Y     | 0.3526 |
| ENSP00000415034 | NBEAL2     | 0.3526 |
| ENSP00000413064 | NAT8L      | 0.3526 |
| ENSP00000261520 | NARG2      | 0.3526 |
| ENSP00000225927 | NAGLU      | 0.3526 |
| ENSP00000274054 | NAF1       | 0.3526 |
| ENSP00000260229 | MMP27      | 0.3526 |
| ENSP00000228506 | MLEC       | 0.3526 |
| ENSP00000255977 | MKRN1      | 0.3526 |
| ENSP00000265498 | MGST2      | 0.3526 |
| ENSP00000408058 | METT11B    | 0.3526 |
| ENSP00000311496 | MARCH10    | 0.3526 |
| ENSP00000272462 | MALL       | 0.3526 |
| ENSP00000368273 | MAGEB2     | 0.3526 |
| ENSP00000328625 | LRRC33     | 0.3526 |
| ENSP00000326604 | LMBR1      | 0.3526 |
| ENSP00000303366 | LMAN2      | 0.3526 |
| ENSP00000283936 | KCNJ16     | 0.3526 |
| ENSP00000432163 | KBTBD3     | 0.3526 |
| ENSP00000302586 | KBTBD2     | 0.3526 |
| ENSP00000323780 | IP6K1      | 0.3526 |
| ENSP00000421191 | IGSF22     | 0.3526 |
| ENSP00000284110 | HS3ST3A1   | 0.3526 |
| ENSP00000284674 | GPR26      | 0.3526 |
| ENSP00000274545 | GABRA6     | 0.3526 |
| ENSP00000398502 | FAM86A     | 0.3526 |
| ENSP00000356382 | F13B       | 0.3526 |
| ENSP00000348380 | CYP20A1    | 0.3526 |
| ENSP00000272852 | CPO        | 0.3526 |
| ENSP00000398105 | CHAC1      | 0.3526 |
| ENSP00000385739 | CEACAM21   | 0.3526 |
| ENSP00000354504 | ASTN2      | 0.3526 |
| ENSP00000301776 | ASRGL1     | 0.3526 |
| ENSP00000326627 | ASIC4      | 0.3526 |
| ENSP00000269299 | ASGR1      | 0.3526 |
| ENSP00000350331 | ASB13      | 0.3526 |
| ENSP00000370546 | ARSD       | 0.3526 |
| ENSP00000216124 | ARSA       | 0.3526 |
| ENSP00000371200 | ARRDC5     | 0.3526 |
| ENSP00000362268 | APOOL      | 0.3526 |
| ENSP00000265224 | ANKRD7     | 0.3526 |
| ENSP00000261739 | ANKRD13A   | 0.3526 |
| ENSP00000305988 | ALCAM      | 0.3526 |
| ENSP00000323816 | AHRR       | 0.3526 |
| ENSP00000472696 | AD000671.6 | 0.3526 |

|                 |              |        |
|-----------------|--------------|--------|
| ENSP00000348459 | ACMSD        | 0.3526 |
| ENSP00000269081 | ABCA10       | 0.3526 |
| ENSP00000005905 | KIAA0100     | 0.3526 |
| ENSP00000371051 | ZZEF1        | 0.3500 |
| ENSP00000364023 | ZXDB         | 0.3500 |
| ENSP00000335384 | ZPBP2        | 0.3500 |
| ENSP00000278853 | ZP1          | 0.3500 |
| ENSP00000309606 | ZNF408       | 0.3500 |
| ENSP00000303468 | ZCCHC4       | 0.3500 |
| ENSP00000362758 | ZBTB26       | 0.3500 |
| ENSP00000306279 | UMOD         | 0.3500 |
| ENSP00000360688 | TXNDC12      | 0.3500 |
| ENSP00000320869 | TRIM41       | 0.3500 |
| ENSP00000309818 | TRHR         | 0.3500 |
| ENSP00000289373 | TMSB15A      | 0.3500 |
| ENSP00000365567 | TM9SF2       | 0.3500 |
| ENSP00000386186 | TIGD1        | 0.3500 |
| ENSP00000352424 | TIAF1        | 0.3500 |
| ENSP00000283025 | TEKT5        | 0.3500 |
| ENSP00000384996 | TBC1D10A     | 0.3500 |
| ENSP00000431719 | TAS2R43      | 0.3500 |
| ENSP00000376822 | STEAP3       | 0.3500 |
| ENSP00000338030 | STARD7       | 0.3500 |
| ENSP00000320634 | SLCO3A1      | 0.3500 |
| ENSP00000370964 | SLCO1C1      | 0.3500 |
| ENSP00000301454 | SLC25A23     | 0.3500 |
| ENSP00000329033 | SLC25A18     | 0.3500 |
| ENSP00000247020 | SDF2         | 0.3500 |
| ENSP00000354061 | SCYL2        | 0.3500 |
| ENSP00000221538 | RSPH6A       | 0.3500 |
| ENSP00000473200 | RP11-295P9.3 | 0.3500 |
| ENSP00000315950 | RNF32        | 0.3500 |
| ENSP00000270631 | PTH2         | 0.3500 |
| ENSP00000370430 | PNPLA4       | 0.3500 |
| ENSP00000221957 | PLIN3        | 0.3500 |
| ENSP00000432688 | PIGY         | 0.3500 |
| ENSP00000164305 | PIGB         | 0.3500 |
| ENSP00000364635 | PADI2        | 0.3500 |
| ENSP00000393559 | PACS2        | 0.3500 |
| ENSP00000263314 | P2RX3        | 0.3500 |
| ENSP00000278780 | OVOL2        | 0.3500 |
| ENSP00000394051 | NOSTRIN      | 0.3500 |
| ENSP00000305877 | NMUR1        | 0.3500 |
| ENSP00000345292 | NDRG3        | 0.3500 |
| ENSP00000348050 | MXRA7        | 0.3500 |
| ENSP00000296003 | MTMR14       | 0.3500 |
| ENSP00000281416 | MFSD6        | 0.3500 |
| ENSP00000384115 | MEI1         | 0.3500 |
| ENSP00000261407 | LPCAT3       | 0.3500 |
| ENSP00000315564 | LGALS9B      | 0.3500 |
| ENSP00000296233 | KLF15        | 0.3500 |
| ENSP00000353331 | KIRREL2      | 0.3500 |
| ENSP00000432561 | HTN3         | 0.3500 |

|                 |           |        |
|-----------------|-----------|--------|
| ENSP00000364493 | HIATL1    | 0.3500 |
| ENSP00000262895 | GRIK5     | 0.3500 |
| ENSP00000318650 | GREM2     | 0.3500 |
| ENSP00000340200 | GLYAT     | 0.3500 |
| ENSP00000271234 | FNBP1L    | 0.3500 |
| ENSP00000374218 | ESYT3     | 0.3500 |
| ENSP00000256951 | EMP1      | 0.3500 |
| ENSP00000333234 | DEFB108B  | 0.3500 |
| ENSP00000376188 | CRLF1     | 0.3500 |
| ENSP00000411904 | CPNE4     | 0.3500 |
| ENSP00000366673 | CLN5      | 0.3500 |
| ENSP00000258385 | CHRND     | 0.3500 |
| ENSP00000161559 | CEACAM1   | 0.3500 |
| ENSP00000368080 | CDKL4     | 0.3500 |
| ENSP00000363330 | CD52      | 0.3500 |
| ENSP00000253968 | BARX1     | 0.3500 |
| ENSP00000358886 | ATXN7L2   | 0.3500 |
| ENSP00000386398 | ANKRD30BL | 0.3500 |
| ENSP00000319713 | AGTRAP    | 0.3500 |
| ENSP00000375599 | DNAAF3    | 0.3500 |
| ENSP00000349401 | ZNF708    | 0.3474 |
| ENSP00000393876 | ZNF655    | 0.3474 |
| ENSP00000343617 | ZNF606    | 0.3474 |
| ENSP00000327314 | ZNF283    | 0.3474 |
| ENSP00000282308 | ZNF256    | 0.3474 |
| ENSP00000383563 | ZG16      | 0.3474 |
| ENSP00000362556 | ZBTB43    | 0.3474 |
| ENSP00000254029 | WDR44     | 0.3474 |
| ENSP00000263150 | WDR37     | 0.3474 |
| ENSP00000308976 | VWC2L     | 0.3474 |
| ENSP00000345216 | USP54     | 0.3474 |
| ENSP00000274278 | UGT3A1    | 0.3474 |
| ENSP00000306344 | TMEM135   | 0.3474 |
| ENSP00000389277 | TMBIM6    | 0.3474 |
| ENSP00000308708 | TCP11     | 0.3474 |
| ENSP00000244625 | TBCC      | 0.3474 |
| ENSP00000258034 | TAAR5     | 0.3474 |
| ENSP00000312284 | SPESP1    | 0.3474 |
| ENSP00000352167 | SLC25A29  | 0.3474 |
| ENSP00000239451 | SLC25A2   | 0.3474 |
| ENSP00000236137 | SLC19A2   | 0.3474 |
| ENSP00000291707 | SIGLEC12  | 0.3474 |
| ENSP00000341584 | SERPINB13 | 0.3474 |
| ENSP00000342109 | SERPINA12 | 0.3474 |
| ENSP00000317691 | RPP25     | 0.3474 |
| ENSP00000274134 | ROPN1L    | 0.3474 |
| ENSP00000252998 | RBBP8NL   | 0.3474 |
| ENSP00000330389 | PTRHD1    | 0.3474 |
| ENSP00000262293 | PRR11     | 0.3474 |
| ENSP00000408288 | PPP1R3E   | 0.3474 |
| ENSP00000011684 | PLEKHG6   | 0.3474 |
| ENSP00000246229 | PLAGL2    | 0.3474 |
| ENSP00000352782 | PHOSPHO2  | 0.3474 |

|                 |             |        |
|-----------------|-------------|--------|
| ENSP00000364609 | PADI3       | 0.3474 |
| ENSP00000451112 | NPC2        | 0.3474 |
| ENSP00000294064 | NEU3        | 0.3474 |
| ENSP00000307887 | MXRA8       | 0.3474 |
| ENSP00000217939 | MXRA5       | 0.3474 |
| ENSP00000395253 | MUC19       | 0.3474 |
| ENSP00000391668 | MTMR11      | 0.3474 |
| ENSP00000379669 | MPV17L      | 0.3474 |
| ENSP00000350353 | METTL20     | 0.3474 |
| ENSP00000345985 | LRFN2       | 0.3474 |
| ENSP00000296603 | LMBRD2      | 0.3474 |
| ENSP00000366280 | LMAN2L      | 0.3474 |
| ENSP00000384979 | LINGO3      | 0.3474 |
| ENSP00000318374 | LENG8       | 0.3474 |
| ENSP00000473047 | KLK11       | 0.3474 |
| ENSP00000309570 | KLF7        | 0.3474 |
| ENSP00000357881 | IKZF5       | 0.3474 |
| ENSP00000234389 | GRIN3B      | 0.3474 |
| ENSP00000314223 | GPR88       | 0.3474 |
| ENSP00000267549 | GPR65       | 0.3474 |
| ENSP00000352547 | GPAT2       | 0.3474 |
| ENSP00000361700 | GLRA4       | 0.3474 |
| ENSP00000259056 | GALNT5      | 0.3474 |
| ENSP00000436604 | GALNT4      | 0.3474 |
| ENSP00000344729 | FAM166A     | 0.3474 |
| ENSP00000424176 | EPPIN-WFDC6 | 0.3474 |
| ENSP00000452085 | EPPIN       | 0.3474 |
| ENSP00000216799 | EMC9        | 0.3474 |
| ENSP00000257312 | DZIP1       | 0.3474 |
| ENSP00000363023 | DLGAP4      | 0.3474 |
| ENSP00000354623 | DFNB31      | 0.3474 |
| ENSP00000376957 | DENND2C     | 0.3474 |
| ENSP00000225428 | CWC25       | 0.3474 |
| ENSP00000366208 | CST11       | 0.3474 |
| ENSP00000369614 | CNTROB      | 0.3474 |
| ENSP00000412365 | CDKL2       | 0.3474 |
| ENSP00000227520 | CCDC86      | 0.3474 |
| ENSP00000453019 | C9orf69     | 0.3474 |
| ENSP00000319914 | C8orf4      | 0.3474 |
| ENSP00000360281 | C8B         | 0.3474 |
| ENSP00000357922 | C1orf56     | 0.3474 |
| ENSP00000303740 | B3GALT1     | 0.3474 |
| ENSP00000386532 | ASB18       | 0.3474 |
| ENSP00000358896 | AS3MT       | 0.3474 |
| ENSP00000365255 | ANKRD26     | 0.3474 |
| ENSP00000367263 | AHNAK       | 0.3474 |
| ENSP00000380999 | ZNF846      | 0.3447 |
| ENSP00000379387 | ZNF445      | 0.3447 |
| ENSP00000338572 | ZNF212      | 0.3447 |
| ENSP00000317542 | WASH4P      | 0.3447 |
| ENSP00000425955 | USP17L5     | 0.3447 |
| ENSP00000264689 | UFSP2       | 0.3447 |
| ENSP00000374387 | TRMT44      | 0.3447 |

|                 |             |        |
|-----------------|-------------|--------|
| ENSP00000332288 | TRIM61      | 0.3447 |
| ENSP00000348216 | TRIM4       | 0.3447 |
| ENSP00000283206 | TMEM87B     | 0.3447 |
| ENSP00000381102 | TMEM55B     | 0.3447 |
| ENSP00000363478 | TMEM50A     | 0.3447 |
| ENSP00000386264 | TMEM237     | 0.3447 |
| ENSP00000282670 | TCTEX1D1    | 0.3447 |
| ENSP00000247879 | TAS2R3      | 0.3447 |
| ENSP00000362095 | SRPX2       | 0.3447 |
| ENSP00000217159 | SLCO4A1     | 0.3447 |
| ENSP00000258538 | SLC41A2     | 0.3447 |
| ENSP00000261918 | SEMA7A      | 0.3447 |
| ENSP00000409799 | RPP21       | 0.3447 |
| ENSP00000404011 | RP11-13B9.3 | 0.3447 |
| ENSP00000328287 | RNF123      | 0.3447 |
| ENSP00000349824 | REPS2       | 0.3447 |
| ENSP00000304311 | REG3A       | 0.3447 |
| ENSP00000348645 | PXDNL       | 0.3447 |
| ENSP00000230381 | PRPH2       | 0.3447 |
| ENSP00000362125 | PCDH19      | 0.3447 |
| ENSP00000341564 | PAQR9       | 0.3447 |
| ENSP00000421981 | PAQR3       | 0.3447 |
| ENSP00000310337 | OR4S2       | 0.3447 |
| ENSP00000355435 | OR2L2       | 0.3447 |
| ENSP00000289820 | NPM2        | 0.3447 |
| ENSP00000404705 | NAALADL2    | 0.3447 |
| ENSP00000326240 | MYNN        | 0.3447 |
| ENSP00000424328 | MRPS30      | 0.3447 |
| ENSP00000244711 | MEA1        | 0.3447 |
| ENSP00000359307 | MAGEA2      | 0.3447 |
| ENSP00000309576 | LGALS8      | 0.3447 |
| ENSP00000383505 | KLHDC7A     | 0.3447 |
| ENSP00000296121 | KIAA1143    | 0.3447 |
| ENSP00000264773 | KCNN2       | 0.3447 |
| ENSP00000259895 | GTF2H4      | 0.3447 |
| ENSP00000356658 | GPR52       | 0.3447 |
| ENSP00000296882 | GJB7        | 0.3447 |
| ENSP00000368805 | GCM2        | 0.3447 |
| ENSP00000348668 | GALNT6      | 0.3447 |
| ENSP00000295452 | GABRG1      | 0.3447 |
| ENSP00000384900 | ERLIN1      | 0.3447 |
| ENSP00000282478 | DSPP        | 0.3447 |
| ENSP00000403984 | DCDC2C      | 0.3447 |
| ENSP00000366953 | DCAF10      | 0.3447 |
| ENSP00000252050 | CUL9        | 0.3447 |
| ENSP00000356370 | CRB1        | 0.3447 |
| ENSP00000443985 | CPEB2       | 0.3447 |
| ENSP00000289957 | CHRN3       | 0.3447 |
| ENSP00000418428 | CHCHD10     | 0.3447 |
| ENSP00000380690 | CCDC64      | 0.3447 |
| ENSP00000425166 | C1orf216    | 0.3447 |
| ENSP00000278483 | C11orf73    | 0.3447 |
| ENSP00000216629 | BDKRB1      | 0.3447 |



|                 |          |        |
|-----------------|----------|--------|
| ENSP00000303042 | AFAP1L2  | 0.3447 |
| ENSP00000274849 | ABT1     | 0.3447 |
| ENSP00000376443 | ABCA5    | 0.3447 |
| ENSP00000438833 | MST1L    | 0.3447 |
| ENSP00000417470 | ZNF786   | 0.3421 |
| ENSP00000382513 | ZNF594   | 0.3421 |
| ENSP00000292562 | ZNF251   | 0.3421 |
| ENSP00000340299 | ZDHHC1   | 0.3421 |
| ENSP00000362763 | ZBTB6    | 0.3421 |
| ENSP00000403760 | USP17L10 | 0.3421 |
| ENSP00000320076 | USH1G    | 0.3421 |
| ENSP00000258821 | TTC5     | 0.3421 |
| ENSP00000327487 | TSEN54   | 0.3421 |
| ENSP00000274773 | TRIM7    | 0.3421 |
| ENSP00000343765 | TRIM60   | 0.3421 |
| ENSP00000308310 | TRIM40   | 0.3421 |
| ENSP00000186436 | TMEM131  | 0.3421 |
| ENSP00000299134 | SVOP     | 0.3421 |
| ENSP00000348314 | SPEF2    | 0.3421 |
| ENSP00000340799 | SP6      | 0.3421 |
| ENSP00000311427 | SNX33    | 0.3421 |
| ENSP00000244227 | SNRNP27  | 0.3421 |
| ENSP00000370543 | SLC5A3   | 0.3421 |
| ENSP00000356105 | SLC41A1  | 0.3421 |
| ENSP00000275300 | SLC22A3  | 0.3421 |
| ENSP00000248958 | SDF2L1   | 0.3421 |
| ENSP00000357692 | S100A16  | 0.3421 |
| ENSP00000376258 | RNF34    | 0.3421 |
| ENSP00000364263 | RNF186   | 0.3421 |
| ENSP00000320508 | RNF185   | 0.3421 |
| ENSP00000347443 | RASSF5   | 0.3421 |
| ENSP00000264160 | R3HDM1   | 0.3421 |
| ENSP00000271331 | PROK1    | 0.3421 |
| ENSP00000383587 | PNRC2    | 0.3421 |
| ENSP00000366460 | PLXDC2   | 0.3421 |
| ENSP00000331106 | PEX26    | 0.3421 |
| ENSP00000308466 | PBLD     | 0.3421 |
| ENSP00000365318 | NFKBIL1  | 0.3421 |
| ENSP00000351484 | NAALADL1 | 0.3421 |
| ENSP00000432481 | NAALAD2  | 0.3421 |
| ENSP00000365473 | MUC21    | 0.3421 |
| ENSP00000271373 | MPC2     | 0.3421 |
| ENSP00000438205 | MANSC1   | 0.3421 |
| ENSP00000333487 | MAGEA2B  | 0.3421 |
| ENSP00000340983 | LRRC25   | 0.3421 |
| ENSP00000375829 | LAD1     | 0.3421 |
| ENSP00000366894 | KLF12    | 0.3421 |
| ENSP00000386738 | KCMF1    | 0.3421 |
| ENSP00000362395 | ITM2A    | 0.3421 |
| ENSP00000354213 | HS3ST3B1 | 0.3421 |
| ENSP00000247584 | HIVEP3   | 0.3421 |
| ENSP00000251287 | HCN2     | 0.3421 |
| ENSP00000259254 | GYPC     | 0.3421 |

|                 |          |        |
|-----------------|----------|--------|
| ENSP00000359512 | GBP3     | 0.3421 |
| ENSP00000206595 | G2E3     | 0.3421 |
| ENSP00000389770 | FXYD3    | 0.3421 |
| ENSP00000263773 | FNBP4    | 0.3421 |
| ENSP00000354481 | FAM5B    | 0.3421 |
| ENSP00000353025 | FAM3C    | 0.3421 |
| ENSP00000322323 | FAM20C   | 0.3421 |
| ENSP00000335076 | EDARADD  | 0.3421 |
| ENSP00000359699 | DNASE2B  | 0.3421 |
| ENSP00000308597 | DLEC1    | 0.3421 |
| ENSP00000261038 | DIRC2    | 0.3421 |
| ENSP00000328359 | DEFA3    | 0.3421 |
| ENSP00000262207 | CRISPLD1 | 0.3421 |
| ENSP00000369268 | CNGA4    | 0.3421 |
| ENSP00000366493 | CGB7     | 0.3421 |
| ENSP00000256151 | CCDC59   | 0.3421 |
| ENSP00000440765 | C16orf13 | 0.3421 |
| ENSP00000341562 | B4GALNT1 | 0.3421 |
| ENSP00000343002 | B3GALTL  | 0.3421 |
| ENSP00000368496 | B3GALT6  | 0.3421 |
| ENSP00000293414 | ASB16    | 0.3421 |
| ENSP00000407193 | ARSG     | 0.3421 |
| ENSP00000382610 | ANKRD18A | 0.3421 |
| ENSP00000228850 | AKAP3    | 0.3421 |
| ENSP00000256997 | ACP2     | 0.3421 |
| ENSP00000337320 | ZNF664   | 0.3395 |
| ENSP00000344129 | ZNF648   | 0.3395 |
| ENSP00000354414 | ZNF627   | 0.3395 |
| ENSP00000288466 | ZNF618   | 0.3395 |
| ENSP00000219091 | ZNF205   | 0.3395 |
| ENSP00000311221 | ZMAT3    | 0.3395 |
| ENSP00000352820 | WDSUB1   | 0.3395 |
| ENSP00000283713 | VILL     | 0.3395 |
| ENSP00000054668 | UTS2     | 0.3395 |
| ENSP00000334276 | UGT2B28  | 0.3395 |
| ENSP00000461518 | TRPV3    | 0.3395 |
| ENSP00000335371 | TRAPPC11 | 0.3395 |
| ENSP00000368391 | TPD52    | 0.3395 |
| ENSP00000421848 | TNFAIP8  | 0.3395 |
| ENSP00000284885 | TMPRSS15 | 0.3395 |
| ENSP00000363824 | TMEM38B  | 0.3395 |
| ENSP00000370736 | TMEM165  | 0.3395 |
| ENSP00000308540 | TBC1D3   | 0.3395 |
| ENSP00000405095 | TAS2R39  | 0.3395 |
| ENSP00000256366 | SYNJ2BP  | 0.3395 |
| ENSP00000308770 | SULT1B1  | 0.3395 |
| ENSP00000337804 | SPAG17   | 0.3395 |
| ENSP00000289932 | SLC5A11  | 0.3395 |
| ENSP00000354689 | SLC39A13 | 0.3395 |
| ENSP00000261892 | SLC24A1  | 0.3395 |
| ENSP00000373420 | RUFY2    | 0.3395 |
| ENSP00000304945 | ROBO4    | 0.3395 |
| ENSP00000321330 | RNF144A  | 0.3395 |

|                 |            |        |
|-----------------|------------|--------|
| ENSP00000341361 | RNF13      | 0.3395 |
| ENSP00000261655 | RIMBP2     | 0.3395 |
| ENSP00000064780 | RELT       | 0.3395 |
| ENSP00000308258 | PTDSS2     | 0.3395 |
| ENSP00000405514 | PPP1R9A    | 0.3395 |
| ENSP00000464890 | POU5F2     | 0.3395 |
| ENSP00000389787 | PLEKHF1    | 0.3395 |
| ENSP00000347931 | PCNXL3     | 0.3395 |
| ENSP00000351153 | PARPBP     | 0.3395 |
| ENSP00000243045 | ORMDL2     | 0.3395 |
| ENSP00000328563 | OR4D9      | 0.3395 |
| ENSP00000255262 | NMUR2      | 0.3395 |
| ENSP00000262510 | NLRC5      | 0.3395 |
| ENSP00000357341 | NCOA7      | 0.3395 |
| ENSP00000298894 | MOAP1      | 0.3395 |
| ENSP00000289359 | MITD1      | 0.3395 |
| ENSP00000010404 | MGST1      | 0.3395 |
| ENSP00000309610 | METTL2A    | 0.3395 |
| ENSP00000359640 | MCOLN2     | 0.3395 |
| ENSP00000300231 | MAP1A      | 0.3395 |
| ENSP00000423463 | LY75-CD302 | 0.3395 |
| ENSP00000341944 | LRRC66     | 0.3395 |
| ENSP00000384291 | LRP5L      | 0.3395 |
| ENSP00000326563 | KDM3B      | 0.3395 |
| ENSP00000351068 | KCNMB2     | 0.3395 |
| ENSP00000242591 | IFT81      | 0.3395 |
| ENSP00000184956 | HEATR6     | 0.3395 |
| ENSP00000355902 | GPATCH2    | 0.3395 |
| ENSP00000317027 | GCNT4      | 0.3395 |
| ENSP00000357644 | GATAD2B    | 0.3395 |
| ENSP00000386029 | GABRR2     | 0.3395 |
| ENSP00000359334 | GABRA3     | 0.3395 |
| ENSP00000264433 | FNIP2      | 0.3395 |
| ENSP00000421985 | FNIP1      | 0.3395 |
| ENSP00000278829 | FADS3      | 0.3395 |
| ENSP00000258534 | DRAM1      | 0.3395 |
| ENSP00000258390 | DOCK10     | 0.3395 |
| ENSP00000324633 | DEFB103B   | 0.3395 |
| ENSP00000364404 | DCAF17     | 0.3395 |
| ENSP00000305731 | CST1       | 0.3395 |
| ENSP00000244751 | CPNE5      | 0.3395 |
| ENSP00000396304 | CLDN25     | 0.3395 |
| ENSP00000352071 | CD163      | 0.3395 |
| ENSP00000224181 | C8G        | 0.3395 |
| ENSP00000334267 | C5orf38    | 0.3395 |
| ENSP00000258761 | BZW2       | 0.3395 |
| ENSP00000305595 | B3GNT2     | 0.3395 |
| ENSP00000296557 | ARFIP1     | 0.3395 |
| ENSP00000249066 | APOL2      | 0.3395 |
| ENSP00000381250 | APOF       | 0.3395 |
| ENSP00000363395 | ANXA8L2    | 0.3395 |
| ENSP00000387233 | ANKRD44    | 0.3395 |
| ENSP00000310015 | ADAT1      | 0.3395 |

|                 |                 |        |
|-----------------|-----------------|--------|
| ENSP00000238618 | ACYP1           | 0.3395 |
| ENSP00000289119 | ABHD3           | 0.3395 |
| ENSP00000379282 | ABHD16A         | 0.3395 |
| ENSP00000239730 | SEPT7L          | 0.3395 |
| ENSP00000353957 | ZNF567          | 0.3368 |
| ENSP00000362609 | ZBTB8A          | 0.3368 |
| ENSP00000376139 | WDR45B          | 0.3368 |
| ENSP00000261708 | UTP6            | 0.3368 |
| ENSP00000373073 | UROC1           | 0.3368 |
| ENSP00000244565 | UNC5CL          | 0.3368 |
| ENSP00000354883 | UBL7            | 0.3368 |
| ENSP00000229771 | TULP1           | 0.3368 |
| ENSP00000257910 | TSPAN31         | 0.3368 |
| ENSP00000299882 | TMPRSS5         | 0.3368 |
| ENSP00000401338 | TMEM8A          | 0.3368 |
| ENSP00000373167 | TIGIT           | 0.3368 |
| ENSP00000309007 | THAP6           | 0.3368 |
| ENSP00000361707 | TCEAL1          | 0.3368 |
| ENSP00000334050 | TAS2R42         | 0.3368 |
| ENSP00000352655 | SLC39A10        | 0.3368 |
| ENSP00000289292 | SHROOM4         | 0.3368 |
| ENSP00000351395 | SCGB1D4         | 0.3368 |
| ENSP00000382895 | RPGRIPI         | 0.3368 |
| ENSP00000455258 | RP11-58C22.1    | 0.3368 |
| ENSP00000310356 | RMI2            | 0.3368 |
| ENSP00000303712 | RBMY1A1         | 0.3368 |
| ENSP00000351608 | PRRT2           | 0.3368 |
| ENSP00000296682 | PRDM9           | 0.3368 |
| ENSP00000356849 | POGK            | 0.3368 |
| ENSP00000246151 | PITHD1          | 0.3368 |
| ENSP00000264917 | PDE8B           | 0.3368 |
| ENSP00000370224 | PARM1           | 0.3368 |
| ENSP00000353953 | PAQR8           | 0.3368 |
| ENSP00000252835 | OR11H1          | 0.3368 |
| ENSP00000309124 | OLR1            | 0.3368 |
| ENSP00000352208 | MYOF            | 0.3368 |
| ENSP00000278949 | MPZL3           | 0.3368 |
| ENSP00000300762 | MMP26           | 0.3368 |
| ENSP00000373476 | MEX3D           | 0.3368 |
| ENSP00000292494 | LY6E            | 0.3368 |
| ENSP00000365253 | LRRC38          | 0.3368 |
| ENSP00000266604 | LLPH            | 0.3368 |
| ENSP00000333711 | LL0XNC01-19D8.1 | 0.3368 |
| ENSP00000392879 | LL0XNC01-19D8.1 | 0.3368 |
| ENSP00000251645 | KRT31           | 0.3368 |
| ENSP00000423897 | KLHL5           | 0.3368 |
| ENSP00000355121 | ITPRIPL1        | 0.3368 |
| ENSP00000276198 | HTR2C           | 0.3368 |
| ENSP00000355870 | HLX             | 0.3368 |
| ENSP00000330601 | HHIPL1          | 0.3368 |
| ENSP00000218516 | GLA             | 0.3368 |
| ENSP00000275732 | GIGYF1          | 0.3368 |
| ENSP00000220822 | GDAP1           | 0.3368 |

|                 |            |        |
|-----------------|------------|--------|
| ENSP00000340396 | GBP5       | 0.3368 |
| ENSP00000265029 | FETUB      | 0.3368 |
| ENSP00000363398 | EXTL1      | 0.3368 |
| ENSP00000245046 | EMC3       | 0.3368 |
| ENSP00000271835 | CRNN       | 0.3368 |
| ENSP00000205636 | CMTM6      | 0.3368 |
| ENSP00000352270 | CMTM5      | 0.3368 |
| ENSP00000276055 | CHST7      | 0.3368 |
| ENSP00000281282 | CGNL1      | 0.3368 |
| ENSP00000337226 | CDCA4      | 0.3368 |
| ENSP00000296449 | CCDC36     | 0.3368 |
| ENSP00000373669 | C17orf59   | 0.3368 |
| ENSP00000224652 | ATE1       | 0.3368 |
| ENSP00000261191 | ASUN       | 0.3368 |
| ENSP00000244669 | APOBEC2    | 0.3368 |
| ENSP00000366826 | ANKRD20A2  | 0.3368 |
| ENSP00000358407 | ADAM30     | 0.3368 |
| ENSP00000368605 | ACOT9      | 0.3368 |
| ENSP00000232744 | ABTB1      | 0.3368 |
| ENSP00000263100 | A1BG       | 0.3368 |
| ENSP00000304843 | MCOLN3     | 0.3368 |
| ENSP00000369802 | DENND4C    | 0.3368 |
| ENSP00000459216 | ZNF578     | 0.3342 |
| ENSP00000340514 | ZNF14      | 0.3342 |
| ENSP00000455911 | ZFP91-CNTF | 0.3342 |
| ENSP00000307858 | ZBTB4      | 0.3342 |
| ENSP00000416707 | XKR6       | 0.3342 |
| ENSP00000258796 | TTYH3      | 0.3342 |
| ENSP00000298772 | TRIM13     | 0.3342 |
| ENSP00000359013 | TNFRSF6B   | 0.3342 |
| ENSP00000261862 | THSD4      | 0.3342 |
| ENSP00000357812 | TDRKH      | 0.3342 |
| ENSP00000335191 | TBX10      | 0.3342 |
| ENSP00000272452 | SULT1C4    | 0.3342 |
| ENSP00000273666 | STXBP5L    | 0.3342 |
| ENSP00000279058 | SPINT4     | 0.3342 |
| ENSP00000365931 | SP2        | 0.3342 |
| ENSP00000431840 | SLC24A4    | 0.3342 |
| ENSP00000194130 | SLC13A1    | 0.3342 |
| ENSP00000347924 | SFXN4      | 0.3342 |
| ENSP00000420357 | RWDD1      | 0.3342 |
| ENSP00000355177 | RUSC2      | 0.3342 |
| ENSP00000369391 | RPP40      | 0.3342 |
| ENSP00000423391 | RFPL4B     | 0.3342 |
| ENSP00000392936 | RFPL4A     | 0.3342 |
| ENSP00000012049 | QPCTL      | 0.3342 |
| ENSP00000317836 | PRR15      | 0.3342 |
| ENSP00000381010 | PRKRIP1    | 0.3342 |
| ENSP00000435300 | PCDHA4     | 0.3342 |
| ENSP00000333735 | NPAP1      | 0.3342 |
| ENSP00000429553 | NKX6-3     | 0.3342 |
| ENSP00000221978 | NKG7       | 0.3342 |
| ENSP00000338648 | MS4A4A     | 0.3342 |

|                 |            |        |
|-----------------|------------|--------|
| ENSP00000310726 | MRP63      | 0.3342 |
| ENSP00000353767 | MMP17      | 0.3342 |
| ENSP00000218721 | MLNR       | 0.3342 |
| ENSP00000378851 | MAPK1IP1L  | 0.3342 |
| ENSP00000368320 | MAGEB6     | 0.3342 |
| ENSP00000368135 | LRRN4      | 0.3342 |
| ENSP00000375629 | LILRB2     | 0.3342 |
| ENSP00000367198 | LECT1      | 0.3342 |
| ENSP00000263598 | LCN1       | 0.3342 |
| ENSP00000353203 | LCE1B      | 0.3342 |
| ENSP00000435466 | KIRREL3    | 0.3342 |
| ENSP00000310557 | KCNE3      | 0.3342 |
| ENSP00000306106 | JAGN1      | 0.3342 |
| ENSP00000357863 | GTF3C6     | 0.3342 |
| ENSP00000256593 | GSTM5      | 0.3342 |
| ENSP00000369643 | GRPR       | 0.3342 |
| ENSP00000369198 | GPR64      | 0.3342 |
| ENSP00000319744 | GPR4       | 0.3342 |
| ENSP00000328818 | GPR132     | 0.3342 |
| ENSP00000379377 | GCNT3      | 0.3342 |
| ENSP00000348897 | GABRA2     | 0.3342 |
| ENSP00000307833 | FBXO22     | 0.3342 |
| ENSP00000328187 | FBXO21     | 0.3342 |
| ENSP00000308575 | FAM46D     | 0.3342 |
| ENSP00000350673 | FAM3B      | 0.3342 |
| ENSP00000307181 | FAM103A1   | 0.3342 |
| ENSP00000265843 | EXPH5      | 0.3342 |
| ENSP00000430271 | ETV3L      | 0.3342 |
| ENSP00000252445 | ELOF1      | 0.3342 |
| ENSP00000417052 | EBP        | 0.3342 |
| ENSP00000221847 | EBI3       | 0.3342 |
| ENSP00000284031 | DDAH1      | 0.3342 |
| ENSP00000311300 | CTSW       | 0.3342 |
| ENSP00000345436 | CASKIN1    | 0.3342 |
| ENSP00000297156 | CAMLG      | 0.3342 |
| ENSP00000270502 | C19orf52   | 0.3342 |
| ENSP00000402020 | C17orf58   | 0.3342 |
| ENSP00000312158 | BTN2A1     | 0.3342 |
| ENSP00000335615 | BTBD7      | 0.3342 |
| ENSP00000306459 | B4GALT6    | 0.3342 |
| ENSP00000352144 | B4GALT4    | 0.3342 |
| ENSP00000216489 | ALKBH1     | 0.3342 |
| ENSP00000405700 | AL953854.2 | 0.3342 |
| ENSP00000317912 | STAP2      | 0.3342 |
| ENSP00000363064 | ZNF76      | 0.3316 |
| ENSP00000338217 | ZNF532     | 0.3316 |
| ENSP00000467931 | ZNF461     | 0.3316 |
| ENSP00000313158 | ZNF366     | 0.3316 |
| ENSP00000309429 | ZDHHC24    | 0.3316 |
| ENSP00000330485 | ZDHHC23    | 0.3316 |
| ENSP00000292778 | YDJC       | 0.3316 |
| ENSP00000335522 | WDR86      | 0.3316 |
| ENSP00000292211 | UBE2Q1     | 0.3316 |

|                 |            |        |
|-----------------|------------|--------|
| ENSP00000207457 | TEKT2      | 0.3316 |
| ENSP00000362390 | TBX22      | 0.3316 |
| ENSP00000386201 | TAS2R41    | 0.3316 |
| ENSP00000218894 | SUPT20H    | 0.3316 |
| ENSP00000156626 | ST6GALNAC1 | 0.3316 |
| ENSP00000266086 | SLC5A4     | 0.3316 |
| ENSP00000393066 | SLC4A10    | 0.3316 |
| ENSP00000320217 | SLC26A10   | 0.3316 |
| ENSP00000358909 | SFXN2      | 0.3316 |
| ENSP00000357909 | SEMA6C     | 0.3316 |
| ENSP00000388942 | SCRN1      | 0.3316 |
| ENSP00000244930 | SCGB2A1    | 0.3316 |
| ENSP00000345044 | SBK2       | 0.3316 |
| ENSP00000340979 | RNF175     | 0.3316 |
| ENSP00000346342 | RFPL1      | 0.3316 |
| ENSP00000421853 | RANBP3L    | 0.3316 |
| ENSP00000349709 | RAET1E     | 0.3316 |
| ENSP00000217043 | R3HDML     | 0.3316 |
| ENSP00000290431 | PKD2L2     | 0.3316 |
| ENSP00000332313 | PIGW       | 0.3316 |
| ENSP00000246535 | PDCD2L     | 0.3316 |
| ENSP00000310585 | PCP2       | 0.3316 |
| ENSP00000358131 | OTUD7B     | 0.3316 |
| ENSP00000352021 | NOL12      | 0.3316 |
| ENSP00000333938 | NEXN       | 0.3316 |
| ENSP00000293201 | MYO15B     | 0.3316 |
| ENSP00000248306 | METTL25    | 0.3316 |
| ENSP00000353246 | MAK16      | 0.3316 |
| ENSP00000373853 | LRRC4B     | 0.3316 |
| ENSP00000424381 | LMF2       | 0.3316 |
| ENSP00000293670 | KRT83      | 0.3316 |
| ENSP00000307240 | KRT74      | 0.3316 |
| ENSP00000055682 | KIAA2022   | 0.3316 |
| ENSP00000316482 | KCTD14     | 0.3316 |
| ENSP00000415106 | KBTBD4     | 0.3316 |
| ENSP00000247933 | IDUA       | 0.3316 |
| ENSP00000350049 | HOMEZ      | 0.3316 |
| ENSP00000259456 | HEMGN      | 0.3316 |
| ENSP00000378548 | GPR135     | 0.3316 |
| ENSP00000349687 | GM2A       | 0.3316 |
| ENSP00000268699 | GAS8       | 0.3316 |
| ENSP00000361932 | FUT11      | 0.3316 |
| ENSP00000360058 | FRAT2      | 0.3316 |
| ENSP00000328230 | FFAR3      | 0.3316 |
| ENSP00000298097 | FBXO33     | 0.3316 |
| ENSP00000362817 | FABP3      | 0.3316 |
| ENSP00000361331 | ERI3       | 0.3316 |
| ENSP00000361705 | DNTTIP1    | 0.3316 |
| ENSP00000319482 | DCUN1D3    | 0.3316 |
| ENSP00000292385 | DBN1       | 0.3316 |
| ENSP00000219599 | CRYM       | 0.3316 |
| ENSP00000282141 | CRYGC      | 0.3316 |
| ENSP00000318804 | CRLF3      | 0.3316 |

|                 |          |        |
|-----------------|----------|--------|
| ENSP00000225719 | CPD      | 0.3316 |
| ENSP00000354960 | COLGALT2 | 0.3316 |
| ENSP00000258807 | CIDEB    | 0.3316 |
| ENSP00000333947 | CHST15   | 0.3316 |
| ENSP00000348564 | CDAN1    | 0.3316 |
| ENSP00000313500 | C17orf53 | 0.3316 |
| ENSP00000330200 | BTNL9    | 0.3316 |
| ENSP00000289361 | BTN3A1   | 0.3316 |
| ENSP00000349022 | ARC      | 0.3316 |
| ENSP00000427211 | APBB2    | 0.3316 |
| ENSP00000308772 | ANKS4B   | 0.3316 |
| ENSP00000302232 | ALKBH3   | 0.3316 |
| ENSP00000342905 | ADNP     | 0.3316 |
| ENSP00000381693 | ZSWIM8   | 0.3289 |
| ENSP00000243644 | ZNF350   | 0.3289 |
| ENSP00000262961 | ZFR2     | 0.3289 |
| ENSP00000362551 | ZBTB34   | 0.3289 |
| ENSP00000006526 | WDR54    | 0.3289 |
| ENSP00000248948 | VPREB3   | 0.3289 |
| ENSP00000380321 | TULP3    | 0.3289 |
| ENSP00000339813 | TPST2    | 0.3289 |
| ENSP00000325738 | TNP2     | 0.3289 |
| ENSP00000393316 | TMX1     | 0.3289 |
| ENSP00000335261 | TMLHE    | 0.3289 |
| ENSP00000360222 | TM2D1    | 0.3289 |
| ENSP00000363031 | THEMIS2  | 0.3289 |
| ENSP00000429430 | TENM2    | 0.3289 |
| ENSP00000340914 | SYT3     | 0.3289 |
| ENSP00000361032 | SURF2    | 0.3289 |
| ENSP00000265087 | STC2     | 0.3289 |
| ENSP00000329200 | STAC3    | 0.3289 |
| ENSP00000291672 | SPATC1L  | 0.3289 |
| ENSP00000301921 | SOX7     | 0.3289 |
| ENSP00000262861 | SIPA1L2  | 0.3289 |
| ENSP00000356744 | SCYL3    | 0.3289 |
| ENSP00000357901 | SCNM1    | 0.3289 |
| ENSP00000296142 | RTP3     | 0.3289 |
| ENSP00000303775 | PROKR1   | 0.3289 |
| ENSP00000260648 | PREPL    | 0.3289 |
| ENSP00000358217 | PRDM13   | 0.3289 |
| ENSP00000361052 | POMGNT1  | 0.3289 |
| ENSP00000410216 | POC5     | 0.3289 |
| ENSP00000365505 | PLP2     | 0.3289 |
| ENSP00000263265 | PLEKHA4  | 0.3289 |
| ENSP00000358753 | PIFO     | 0.3289 |
| ENSP00000295992 | PCOLCE2  | 0.3289 |
| ENSP00000384408 | PARG     | 0.3289 |
| ENSP00000379003 | NUPR1    | 0.3289 |
| ENSP00000332766 | NPB      | 0.3289 |
| ENSP00000383840 | MMACHC   | 0.3289 |
| ENSP00000388825 | MLN      | 0.3289 |
| ENSP00000298296 | MAGEC3   | 0.3289 |
| ENSP00000357762 | KPRP     | 0.3289 |



|                 |           |        |
|-----------------|-----------|--------|
| ENSP00000385879 | KBTBD12   | 0.3289 |
| ENSP00000333350 | JRKL      | 0.3289 |
| ENSP00000348986 | INS-IGF2  | 0.3289 |
| ENSP00000342114 | ICAM4     | 0.3289 |
| ENSP00000253457 | EMC8      | 0.3289 |
| ENSP00000319705 | DUOXA2    | 0.3289 |
| ENSP00000261615 | DPEP1     | 0.3289 |
| ENSP00000371546 | DEPDC5    | 0.3289 |
| ENSP00000353373 | CUEDC1    | 0.3289 |
| ENSP00000295589 | CCKAR     | 0.3289 |
| ENSP00000355492 | C1orf101  | 0.3289 |
| ENSP00000253110 | C19orf66  | 0.3289 |
| ENSP00000373657 | C17orf85  | 0.3289 |
| ENSP00000304987 | BFSP2     | 0.3289 |
| ENSP00000360776 | B4GALT5   | 0.3289 |
| ENSP00000390784 | B3GALT4   | 0.3289 |
| ENSP00000347152 | ATRNL1    | 0.3289 |
| ENSP00000347802 | ANKRD35   | 0.3289 |
| ENSP00000359982 | ANKRD13C  | 0.3289 |
| ENSP00000267339 | ANKRD10   | 0.3289 |
| ENSP00000226355 | AFM       | 0.3289 |
| ENSP00000264377 | ADAM23    | 0.3289 |
| ENSP00000364005 | LPPR1     | 0.3289 |
| ENSP00000046087 | ZBPB      | 0.3263 |
| ENSP00000369777 | ZNF768    | 0.3263 |
| ENSP00000294740 | ZNF281    | 0.3263 |
| ENSP00000219069 | ZNF263    | 0.3263 |
| ENSP00000361790 | ZFP69     | 0.3263 |
| ENSP00000387462 | ZBTB10    | 0.3263 |
| ENSP00000252826 | TRPM4     | 0.3263 |
| ENSP00000309792 | TMEM234   | 0.3263 |
| ENSP00000355162 | TIGD4     | 0.3263 |
| ENSP00000304941 | TCTN2     | 0.3263 |
| ENSP00000354777 | TBKBP1    | 0.3263 |
| ENSP00000357836 | SNX27     | 0.3263 |
| ENSP00000266980 | SLC39A5   | 0.3263 |
| ENSP00000347778 | SLC26A8   | 0.3263 |
| ENSP00000269298 | SAT2      | 0.3263 |
| ENSP00000216487 | RIN3      | 0.3263 |
| ENSP00000344779 | RHBDD1    | 0.3263 |
| ENSP00000331342 | RAB11FIP1 | 0.3263 |
| ENSP00000382241 | QSER1     | 0.3263 |
| ENSP00000296666 | PRRC1     | 0.3263 |
| ENSP00000307292 | PRKCDBP   | 0.3263 |
| ENSP00000358106 | PREP      | 0.3263 |
| ENSP00000264254 | PDCL3     | 0.3263 |
| ENSP00000322249 | ORAI3     | 0.3263 |
| ENSP00000309767 | NLRP6     | 0.3263 |
| ENSP00000345716 | NKAPL     | 0.3263 |
| ENSP00000320318 | NEU4      | 0.3263 |
| ENSP00000367024 | NAA40     | 0.3263 |
| ENSP00000315064 | MAGEF1    | 0.3263 |
| ENSP00000294818 | LRRC52    | 0.3263 |

|                 |             |        |
|-----------------|-------------|--------|
| ENSP00000371548 | LGI2        | 0.3263 |
| ENSP00000357768 | LCE2A       | 0.3263 |
| ENSP00000310216 | KLRC4       | 0.3263 |
| ENSP00000339634 | KIR2DL4     | 0.3263 |
| ENSP00000306275 | KCNK3       | 0.3263 |
| ENSP00000420182 | IQCJ-SCHIP1 | 0.3263 |
| ENSP00000349365 | IL27        | 0.3263 |
| ENSP00000330606 | HS3ST4      | 0.3263 |
| ENSP00000370826 | HR          | 0.3263 |
| ENSP00000259951 | HLA-F       | 0.3263 |
| ENSP00000368965 | HGSNAT      | 0.3263 |
| ENSP00000357342 | HCN3        | 0.3263 |
| ENSP00000299314 | GNPTAB      | 0.3263 |
| ENSP00000310770 | GLIPR1L1    | 0.3263 |
| ENSP00000286955 | FUT6        | 0.3263 |
| ENSP00000246549 | FFAR2       | 0.3263 |
| ENSP00000261275 | FAM189A1    | 0.3263 |
| ENSP00000251527 | ESYT2       | 0.3263 |
| ENSP00000253673 | EMR3        | 0.3263 |
| ENSP00000377430 | DPEP2       | 0.3263 |
| ENSP00000319255 | CHORDC1     | 0.3263 |
| ENSP00000378812 | CHCHD2      | 0.3263 |
| ENSP00000444052 | CES4A       | 0.3263 |
| ENSP00000325681 | CCZ1        | 0.3263 |
| ENSP00000334996 | CCIN        | 0.3263 |
| ENSP00000449960 | CALCOCO1    | 0.3263 |
| ENSP00000448598 | C17orf49    | 0.3263 |
| ENSP00000433157 | BBIP1       | 0.3263 |
| ENSP00000262919 | ATRNL       | 0.3263 |
| ENSP00000403302 | ANKRD36C    | 0.3263 |
| ENSP00000405252 | AKAP7       | 0.3263 |
| ENSP00000268070 | ADAMTS17    | 0.3263 |
| ENSP00000265769 | ADAM28      | 0.3263 |
| ENSP00000221315 | ZNF432      | 0.3237 |
| ENSP00000228289 | ZNF268      | 0.3237 |
| ENSP00000287169 | ZDHHC5      | 0.3237 |
| ENSP00000295237 | XIRP2       | 0.3237 |
| ENSP00000346667 | WNK3        | 0.3237 |
| ENSP00000378857 | WDR6        | 0.3237 |
| ENSP00000254806 | WBP2        | 0.3237 |
| ENSP00000358470 | VTCN1       | 0.3237 |
| ENSP00000258398 | TTL4        | 0.3237 |
| ENSP00000342499 | TSTD2       | 0.3237 |
| ENSP00000182290 | TSPAN32     | 0.3237 |
| ENSP00000332284 | TRIM69      | 0.3237 |
| ENSP00000215838 | TCN2        | 0.3237 |
| ENSP00000301244 | SPINT2      | 0.3237 |
| ENSP00000355577 | SLC35F3     | 0.3237 |
| ENSP00000356518 | SHCBP1L     | 0.3237 |
| ENSP00000350633 | SERTAD1     | 0.3237 |
| ENSP00000284136 | SEMA3D      | 0.3237 |
| ENSP00000383411 | SAMSN1      | 0.3237 |
| ENSP00000261441 | RSBN1       | 0.3237 |

|                 |          |        |
|-----------------|----------|--------|
| ENSP00000378349 | RCN2     | 0.3237 |
| ENSP00000323074 | RAI1     | 0.3237 |
| ENSP00000271620 | PRUNE    | 0.3237 |
| ENSP00000241808 | PRM2     | 0.3237 |
| ENSP00000282406 | PLEKHH2  | 0.3237 |
| ENSP00000367177 | PCDH8    | 0.3237 |
| ENSP00000304846 | OR2AT4   | 0.3237 |
| ENSP00000457628 | NUB1     | 0.3237 |
| ENSP00000327545 | NPTXR    | 0.3237 |
| ENSP00000336894 | NAB1     | 0.3237 |
| ENSP00000278836 | MYRF     | 0.3237 |
| ENSP00000247712 | MPV17L2  | 0.3237 |
| ENSP00000357123 | MNDA     | 0.3237 |
| ENSP00000348308 | MMP23B   | 0.3237 |
| ENSP00000330051 | MFSD6L   | 0.3237 |
| ENSP00000373474 | METTL14  | 0.3237 |
| ENSP00000310593 | MAP9     | 0.3237 |
| ENSP00000244096 | MAGEA10  | 0.3237 |
| ENSP00000215886 | LGALS2   | 0.3237 |
| ENSP00000334187 | LCE1F    | 0.3237 |
| ENSP00000299213 | LARP6    | 0.3237 |
| ENSP00000320917 | KRI1     | 0.3237 |
| ENSP00000363360 | INIP     | 0.3237 |
| ENSP00000367848 | GABRD    | 0.3237 |
| ENSP00000335651 | FSD2     | 0.3237 |
| ENSP00000300147 | ELFN2    | 0.3237 |
| ENSP00000365147 | EFHD2    | 0.3237 |
| ENSP00000359629 | CRTAC1   | 0.3237 |
| ENSP00000316605 | CNGB3    | 0.3237 |
| ENSP00000228438 | CLEC2B   | 0.3237 |
| ENSP00000299752 | CDH16    | 0.3237 |
| ENSP00000296129 | CDCP1    | 0.3237 |
| ENSP00000426174 | CCDC169  | 0.3237 |
| ENSP00000297273 | CASD1    | 0.3237 |
| ENSP00000366662 | CA6      | 0.3237 |
| ENSP00000369339 | C9orf72  | 0.3237 |
| ENSP00000373509 | C11orf31 | 0.3237 |
| ENSP00000346251 | BPIFA1   | 0.3237 |
| ENSP00000320219 | ARSJ     | 0.3237 |
| ENSP00000454770 | ANKRD66  | 0.3237 |
| ENSP00000360905 | AGBL4    | 0.3237 |
| ENSP00000298715 | VWA2     | 0.3237 |
| ENSP00000388902 | CCNJ     | 0.3237 |
| ENSP00000301093 | ZNF701   | 0.3211 |
| ENSP00000380351 | ZNF682   | 0.3211 |
| ENSP00000301475 | ZNF558   | 0.3211 |
| ENSP00000470381 | ZNF468   | 0.3211 |
| ENSP00000411514 | ZNF385C  | 0.3211 |
| ENSP00000301318 | ZFP28    | 0.3211 |
| ENSP00000368017 | ZFC3H1   | 0.3211 |
| ENSP00000323183 | ZBTB2    | 0.3211 |
| ENSP00000391088 | UNC80    | 0.3211 |
| ENSP00000265403 | UGT2B10  | 0.3211 |

|                 |          |        |
|-----------------|----------|--------|
| ENSP00000358762 | UBE3D    | 0.3211 |
| ENSP00000296015 | TTC14    | 0.3211 |
| ENSP00000318615 | TRIM73   | 0.3211 |
| ENSP00000304710 | TMC7     | 0.3211 |
| ENSP00000297784 | TMC1     | 0.3211 |
| ENSP00000341803 | TCTEX1D4 | 0.3211 |
| ENSP00000363441 | SYT15    | 0.3211 |
| ENSP00000348206 | SLMO2    | 0.3211 |
| ENSP00000259392 | SLC31A2  | 0.3211 |
| ENSP00000308895 | SLC19A1  | 0.3211 |
| ENSP00000362650 | SCAI     | 0.3211 |
| ENSP00000256733 | SAA2     | 0.3211 |
| ENSP00000344489 | RNF133   | 0.3211 |
| ENSP00000377303 | RENBP    | 0.3211 |
| ENSP00000376899 | PTGFRN   | 0.3211 |
| ENSP00000310515 | PRM1     | 0.3211 |
| ENSP00000260113 | PI15     | 0.3211 |
| ENSP00000400958 | PHTF2    | 0.3211 |
| ENSP00000400895 | OTOGL    | 0.3211 |
| ENSP00000330247 | NT5DC4   | 0.3211 |
| ENSP00000378089 | NMB      | 0.3211 |
| ENSP00000369400 | NHS      | 0.3211 |
| ENSP00000310998 | NAGPA    | 0.3211 |
| ENSP00000382328 | N4BP2L2  | 0.3211 |
| ENSP00000327465 | MYT1     | 0.3211 |
| ENSP00000383333 | MORC3    | 0.3211 |
| ENSP00000358512 | MAB21L3  | 0.3211 |
| ENSP00000356143 | LRRN2    | 0.3211 |
| ENSP00000366028 | KLK9     | 0.3211 |
| ENSP00000351207 | KIAA1671 | 0.3211 |
| ENSP00000221980 | ICAM5    | 0.3211 |
| ENSP00000216106 | HMGXB4   | 0.3211 |
| ENSP00000370125 | HMGN1    | 0.3211 |
| ENSP00000356630 | HECA     | 0.3211 |
| ENSP00000365596 | GPR183   | 0.3211 |
| ENSP00000453076 | GPR176   | 0.3211 |
| ENSP00000276077 | GPR174   | 0.3211 |
| ENSP00000265417 | GPR116   | 0.3211 |
| ENSP00000343234 | GAL3ST1  | 0.3211 |
| ENSP00000260257 | FDXACB1  | 0.3211 |
| ENSP00000362978 | EYA3     | 0.3211 |
| ENSP00000326411 | CWF19L1  | 0.3211 |
| ENSP00000245903 | CD70     | 0.3211 |
| ENSP00000312399 | CCDC63   | 0.3211 |
| ENSP00000367755 | CAMKMT   | 0.3211 |
| ENSP00000178638 | CA12     | 0.3211 |
| ENSP00000343318 | B3GALT5  | 0.3211 |
| ENSP00000369996 | ATXN3L   | 0.3211 |
| ENSP00000282185 | ATG10    | 0.3211 |
| ENSP00000347140 | ASGR2    | 0.3211 |
| ENSP00000346378 | APBB3    | 0.3211 |
| ENSP00000304586 | ANKS3    | 0.3211 |
| ENSP00000321731 | ANKRD24  | 0.3211 |

|                 |          |        |
|-----------------|----------|--------|
| ENSP00000378328 | ANKRD13B | 0.3211 |
| ENSP00000353249 | AGBL5    | 0.3211 |
| ENSP00000286744 | ADAMTSL3 | 0.3211 |
| ENSP00000366240 | ABHD17B  | 0.3211 |
| ENSP00000376135 | ZNF605   | 0.3184 |
| ENSP00000421258 | ZNF154   | 0.3184 |
| ENSP00000314153 | ZBTB33   | 0.3184 |
| ENSP00000340797 | TRIM3    | 0.3184 |
| ENSP00000302413 | TPST1    | 0.3184 |
| ENSP00000312304 | TPMT     | 0.3184 |
| ENSP00000300433 | TMEM92   | 0.3184 |
| ENSP00000401513 | STRC     | 0.3184 |
| ENSP00000315182 | SHQ1     | 0.3184 |
| ENSP00000249007 | RFPL3    | 0.3184 |
| ENSP00000298999 | R3HCC1L  | 0.3184 |
| ENSP00000316675 | PVRIG    | 0.3184 |
| ENSP00000257860 | PRPH     | 0.3184 |
| ENSP00000358320 | POLR3GL  | 0.3184 |
| ENSP00000367817 | PODXL    | 0.3184 |
| ENSP00000294489 | PDPN     | 0.3184 |
| ENSP00000329689 | OR10G7   | 0.3184 |
| ENSP00000267017 | NPFF     | 0.3184 |
| ENSP00000358307 | NHLRC2   | 0.3184 |
| ENSP00000286479 | NAT2     | 0.3184 |
| ENSP00000349678 | MYBPHL   | 0.3184 |
| ENSP00000412130 | MRV11    | 0.3184 |
| ENSP00000382178 | MDGA2    | 0.3184 |
| ENSP00000402584 | MDGA1    | 0.3184 |
| ENSP00000368264 | MAGEB1   | 0.3184 |
| ENSP00000248668 | LRFN1    | 0.3184 |
| ENSP00000357773 | LCE2D    | 0.3184 |
| ENSP00000257867 | LACRT    | 0.3184 |
| ENSP00000306261 | KRT78    | 0.3184 |
| ENSP00000251993 | KIAA0930 | 0.3184 |
| ENSP00000327611 | KCNK12   | 0.3184 |
| ENSP00000244241 | IL17C    | 0.3184 |
| ENSP00000410447 | IKZF2    | 0.3184 |
| ENSP00000449784 | HECTD4   | 0.3184 |
| ENSP00000312002 | HAVCR2   | 0.3184 |
| ENSP00000411827 | GPR137   | 0.3184 |
| ENSP00000317385 | GLIPR1L2 | 0.3184 |
| ENSP00000355827 | FBXO28   | 0.3184 |
| ENSP00000265978 | FAM160A2 | 0.3184 |
| ENSP00000342144 | EVC2     | 0.3184 |
| ENSP00000339115 | ESPNL    | 0.3184 |
| ENSP00000221730 | EPHX3    | 0.3184 |
| ENSP00000296149 | ELP6     | 0.3184 |
| ENSP00000372160 | DOK6     | 0.3184 |
| ENSP00000331470 | DBX2     | 0.3184 |
| ENSP00000241312 | CSMD2    | 0.3184 |
| ENSP00000295728 | CRYBA2   | 0.3184 |
| ENSP00000329748 | CPNE8    | 0.3184 |
| ENSP00000314299 | CFHR1    | 0.3184 |

|                 |          |        |
|-----------------|----------|--------|
| ENSP00000230053 | B3GAT2   | 0.3184 |
| ENSP00000369513 | ATP6AP1L | 0.3184 |
| ENSP00000355340 | APOBEC3C | 0.3184 |
| ENSP00000328515 | ZNF696   | 0.3158 |
| ENSP00000270617 | ZNF473   | 0.3158 |
| ENSP00000350773 | ZNF329   | 0.3158 |
| ENSP00000364798 | ZBTB40   | 0.3158 |
| ENSP00000336127 | TTC7B    | 0.3158 |
| ENSP00000327738 | TRIML1   | 0.3158 |
| ENSP00000402595 | TRIM34   | 0.3158 |
| ENSP00000333441 | TREX2    | 0.3158 |
| ENSP00000261234 | TMEM5    | 0.3158 |
| ENSP00000344503 | TMEM201  | 0.3158 |
| ENSP00000291934 | TMEM190  | 0.3158 |
| ENSP00000254250 | THAP1    | 0.3158 |
| ENSP00000310193 | TBC1D10C | 0.3158 |
| ENSP00000290271 | STC1     | 0.3158 |
| ENSP00000318445 | ST3GAL1  | 0.3158 |
| ENSP00000346537 | SMOC2    | 0.3158 |
| ENSP00000297195 | SLC29A4  | 0.3158 |
| ENSP00000334594 | SLC10A7  | 0.3158 |
| ENSP00000368165 | SDHAF1   | 0.3158 |
| ENSP00000362894 | RTKN2    | 0.3158 |
| ENSP00000355899 | RRP15    | 0.3158 |
| ENSP00000244061 | RNF114   | 0.3158 |
| ENSP00000216085 | RHBDD3   | 0.3158 |
| ENSP00000305696 | RBFA     | 0.3158 |
| ENSP00000417658 | PTCHD3   | 0.3158 |
| ENSP00000365694 | PPP1R10  | 0.3158 |
| ENSP00000222572 | PON2     | 0.3158 |
| ENSP00000244221 | PAIP2B   | 0.3158 |
| ENSP00000347003 | OR5K4    | 0.3158 |
| ENSP00000277309 | OR1K1    | 0.3158 |
| ENSP00000398290 | NDUFA3   | 0.3158 |
| ENSP00000364407 | METTL8   | 0.3158 |
| ENSP00000351669 | MANEA    | 0.3158 |
| ENSP00000347358 | MAGEA11  | 0.3158 |
| ENSP00000263177 | LPPR5    | 0.3158 |
| ENSP00000260702 | LOXL4    | 0.3158 |
| ENSP00000357757 | LCE1C    | 0.3158 |
| ENSP00000247194 | L3HYPDH  | 0.3158 |
| ENSP00000383672 | KIR3DS1  | 0.3158 |
| ENSP00000401878 | KBTBD8   | 0.3158 |
| ENSP00000238647 | IRF2BPL  | 0.3158 |
| ENSP00000342520 | IL17REL  | 0.3158 |
| ENSP00000364371 | HIATL2   | 0.3158 |
| ENSP00000342118 | HHIPL2   | 0.3158 |
| ENSP00000216338 | GZMH     | 0.3158 |
| ENSP00000361207 | GHITM    | 0.3158 |
| ENSP00000337512 | FTSJD1   | 0.3158 |
| ENSP00000319897 | FAM214B  | 0.3158 |
| ENSP00000377566 | ELMO3    | 0.3158 |
| ENSP00000262593 | DOK5     | 0.3158 |

|                 |            |        |
|-----------------|------------|--------|
| ENSP00000350266 | DENND2D    | 0.3158 |
| ENSP00000330488 | CXorf38    | 0.3158 |
| ENSP00000330523 | CTHRC1     | 0.3158 |
| ENSP00000345079 | CSRP1      | 0.3158 |
| ENSP00000315203 | CREG2      | 0.3158 |
| ENSP00000359540 | CREG1      | 0.3158 |
| ENSP00000354255 | CPZ        | 0.3158 |
| ENSP00000252599 | COLGALT1   | 0.3158 |
| ENSP00000327599 | CLEC4G     | 0.3158 |
| ENSP00000408631 | CIDEC      | 0.3158 |
| ENSP00000307911 | CHST2      | 0.3158 |
| ENSP00000312663 | CHRNA9     | 0.3158 |
| ENSP00000393854 | CENPBD1    | 0.3158 |
| ENSP00000363139 | CD164L2    | 0.3158 |
| ENSP00000387641 | CAND2      | 0.3158 |
| ENSP00000381270 | C6orf170   | 0.3158 |
| ENSP00000274000 | AP1AR      | 0.3158 |
| ENSP00000254835 | ANKRD20A3  | 0.3158 |
| ENSP00000215479 | AMELY      | 0.3158 |
| ENSP00000422554 | ADAMTS12   | 0.3158 |
| ENSP00000375413 | AC011841.1 | 0.3158 |
| ENSP00000299698 | A2ML1      | 0.3158 |
| ENSP00000223210 | ZNF862     | 0.3132 |
| ENSP00000352444 | ZNF33B     | 0.3132 |
| ENSP00000299667 | ZNF3       | 0.3132 |
| ENSP00000263095 | ZNF264     | 0.3132 |
| ENSP00000345809 | ZNF197     | 0.3132 |
| ENSP00000323148 | ZKSCAN1    | 0.3132 |
| ENSP00000370242 | WWC3       | 0.3132 |
| ENSP00000393183 | VPRBP      | 0.3132 |
| ENSP00000357556 | VENTX      | 0.3132 |
| ENSP00000244709 | TREM1      | 0.3132 |
| ENSP00000343577 | TPSAB1     | 0.3132 |
| ENSP00000294309 | TPCN2      | 0.3132 |
| ENSP00000298351 | TMEM63C    | 0.3132 |
| ENSP00000305892 | TMEM208    | 0.3132 |
| ENSP00000347444 | TDRD7      | 0.3132 |
| ENSP00000418994 | SYNPR      | 0.3132 |
| ENSP00000338742 | SULT1A2    | 0.3132 |
| ENSP00000359070 | STMN3      | 0.3132 |
| ENSP00000369419 | STEAP4     | 0.3132 |
| ENSP00000270570 | SLC47A1    | 0.3132 |
| ENSP00000363329 | SLC31A1    | 0.3132 |
| ENSP00000460571 | RP1-4G17.5 | 0.3132 |
| ENSP00000255006 | RIN2       | 0.3132 |
| ENSP00000304139 | RBMXL2     | 0.3132 |
| ENSP00000339692 | RASSF4     | 0.3132 |
| ENSP00000333490 | PRHOXNB    | 0.3132 |
| ENSP00000397947 | PLEKHA8    | 0.3132 |
| ENSP00000281382 | PIGF       | 0.3132 |
| ENSP00000348752 | ORAI2      | 0.3132 |
| ENSP00000329467 | OR4M2      | 0.3132 |
| ENSP00000300127 | OR4D6      | 0.3132 |

|                 |            |        |
|-----------------|------------|--------|
| ENSP00000352717 | OR13G1     | 0.3132 |
| ENSP00000356191 | OPTC       | 0.3132 |
| ENSP00000273598 | NICN1      | 0.3132 |
| ENSP00000379394 | NAV2       | 0.3132 |
| ENSP00000347486 | MORN3      | 0.3132 |
| ENSP00000357776 | LCE3D      | 0.3132 |
| ENSP00000406970 | LAX1       | 0.3132 |
| ENSP00000360676 | KTI12      | 0.3132 |
| ENSP00000445768 | KIAA1147   | 0.3132 |
| ENSP00000282146 | KCNK13     | 0.3132 |
| ENSP00000323587 | ITLN1      | 0.3132 |
| ENSP00000415900 | IL31RA     | 0.3132 |
| ENSP00000359581 | HS2ST1     | 0.3132 |
| ENSP00000344844 | HAVCR1     | 0.3132 |
| ENSP00000355799 | GPR31      | 0.3132 |
| ENSP00000308479 | GPR171     | 0.3132 |
| ENSP00000276218 | GPR119     | 0.3132 |
| ENSP00000369895 | GEMIN8     | 0.3132 |
| ENSP00000265000 | GALNT7     | 0.3132 |
| ENSP00000297107 | GALNT10    | 0.3132 |
| ENSP00000265294 | GABRP      | 0.3132 |
| ENSP00000331912 | GABRG3     | 0.3132 |
| ENSP00000037869 | FAM136A    | 0.3132 |
| ENSP00000297258 | FABP5      | 0.3132 |
| ENSP00000326342 | ELMOD2     | 0.3132 |
| ENSP00000250454 | EAPP       | 0.3132 |
| ENSP00000352785 | DSG4       | 0.3132 |
| ENSP00000371835 | DEFB126    | 0.3132 |
| ENSP00000320951 | DEFB103A   | 0.3132 |
| ENSP00000371682 | DCAF16     | 0.3132 |
| ENSP00000349204 | CRB3       | 0.3132 |
| ENSP00000336994 | CLPTM1     | 0.3132 |
| ENSP00000338728 | CCDC88A    | 0.3132 |
| ENSP00000084798 | CA11       | 0.3132 |
| ENSP00000272139 | C1orf35    | 0.3132 |
| ENSP00000219139 | C16orf70   | 0.3132 |
| ENSP00000394316 | BZW1       | 0.3132 |
| ENSP00000260442 | BCL2L10    | 0.3132 |
| ENSP00000316173 | B3GNT5     | 0.3132 |
| ENSP00000359660 | AVPI1      | 0.3132 |
| ENSP00000319778 | AURKAIP1   | 0.3132 |
| ENSP00000366697 | ANKRD20A1  | 0.3132 |
| ENSP00000380557 | AKAP8L     | 0.3132 |
| ENSP00000325519 | AC020907.1 | 0.3132 |
| ENSP00000327691 | HMGN4      | 0.3132 |
| ENSP00000302222 | ZNF25      | 0.3105 |
| ENSP00000423820 | ZFP62      | 0.3105 |
| ENSP00000371559 | TSSC1      | 0.3105 |
| ENSP00000334657 | TRIM46     | 0.3105 |
| ENSP00000234798 | TPSG1      | 0.3105 |
| ENSP00000259339 | TOR1B      | 0.3105 |
| ENSP00000246024 | TMX4       | 0.3105 |
| ENSP00000444565 | TMUB2      | 0.3105 |



|                 |            |        |
|-----------------|------------|--------|
| ENSP00000351737 | TMEM126B   | 0.3105 |
| ENSP00000350630 | TLL2       | 0.3105 |
| ENSP00000271064 | TINAGL1    | 0.3105 |
| ENSP00000386538 | TBC1D10B   | 0.3105 |
| ENSP00000287908 | STEAP2     | 0.3105 |
| ENSP00000312946 | STAB1      | 0.3105 |
| ENSP00000291839 | ST6GALNAC6 | 0.3105 |
| ENSP00000274565 | SPINK7     | 0.3105 |
| ENSP00000369407 | SLC25A35   | 0.3105 |
| ENSP00000340505 | SENP8      | 0.3105 |
| ENSP00000361557 | RBM41      | 0.3105 |
| ENSP00000360112 | RAVER2     | 0.3105 |
| ENSP00000319730 | PRSS8      | 0.3105 |
| ENSP00000355719 | PRSS38     | 0.3105 |
| ENSP00000356278 | PHLDA3     | 0.3105 |
| ENSP00000278243 | PGAP2      | 0.3105 |
| ENSP00000470539 | PET100     | 0.3105 |
| ENSP00000306688 | OR2M4      | 0.3105 |
| ENSP00000294794 | OLFML2B    | 0.3105 |
| ENSP00000351650 | NUDT3      | 0.3105 |
| ENSP00000295461 | NIPAL1     | 0.3105 |
| ENSP00000343847 | NEK10      | 0.3105 |
| ENSP00000240050 | MTERFD3    | 0.3105 |
| ENSP00000311827 | MSL2       | 0.3105 |
| ENSP00000356940 | MOXD1      | 0.3105 |
| ENSP00000347896 | MBD6       | 0.3105 |
| ENSP00000334375 | LRCH3      | 0.3105 |
| ENSP00000352962 | LPPR3      | 0.3105 |
| ENSP00000360472 | LGI1       | 0.3105 |
| ENSP00000379034 | KLHDC7B    | 0.3105 |
| ENSP00000324742 | IL32       | 0.3105 |
| ENSP00000299157 | IKBIP      | 0.3105 |
| ENSP00000263863 | GPLY       | 0.3105 |
| ENSP00000268695 | GALNS      | 0.3105 |
| ENSP00000221347 | FCGBP      | 0.3105 |
| ENSP00000247977 | FBXL12     | 0.3105 |
| ENSP00000300030 | FAM96A     | 0.3105 |
| ENSP00000351259 | FAM21B     | 0.3105 |
| ENSP00000298492 | FAM175B    | 0.3105 |
| ENSP00000353393 | F8         | 0.3105 |
| ENSP00000359131 | EXTL2      | 0.3105 |
| ENSP00000378254 | EML3       | 0.3105 |
| ENSP00000356898 | DDR2       | 0.3105 |
| ENSP00000373343 | CPNE9      | 0.3105 |
| ENSP00000386962 | CATSPERG   | 0.3105 |
| ENSP00000363298 | BSPRY      | 0.3105 |
| ENSP00000357927 | BNIP1      | 0.3105 |
| ENSP00000287590 | B3GNT7     | 0.3105 |
| ENSP00000321874 | B3GNT3     | 0.3105 |
| ENSP00000275699 | ASB15      | 0.3105 |
| ENSP00000256389 | ADAM20     | 0.3105 |
| ENSP00000414066 | ACN9       | 0.3105 |
| ENSP00000471569 | GABRR3     | 0.3105 |

|                 |              |        |
|-----------------|--------------|--------|
| ENSP00000359606 | ZNHIT6       | 0.3079 |
| ENSP00000324598 | ZNF540       | 0.3079 |
| ENSP00000315173 | ZNF41        | 0.3079 |
| ENSP00000397163 | ZNF286A      | 0.3079 |
| ENSP00000349796 | ZNF23        | 0.3079 |
| ENSP00000348848 | WDR45        | 0.3079 |
| ENSP00000347915 | TTC30A       | 0.3079 |
| ENSP00000339820 | TSPAN18      | 0.3079 |
| ENSP00000362387 | TSPAN15      | 0.3079 |
| ENSP00000236979 | TNP1         | 0.3079 |
| ENSP00000321038 | TMEM86B      | 0.3079 |
| ENSP00000234831 | TMEM59       | 0.3079 |
| ENSP00000363463 | TMEM57       | 0.3079 |
| ENSP00000338624 | TASP1        | 0.3079 |
| ENSP00000333310 | SULT1C3      | 0.3079 |
| ENSP00000367139 | SPINK9       | 0.3079 |
| ENSP00000322649 | SLC25A41     | 0.3079 |
| ENSP00000358515 | SLC22A15     | 0.3079 |
| ENSP00000273861 | SLC10A4      | 0.3079 |
| ENSP00000321077 | SIGLEC8      | 0.3079 |
| ENSP00000323328 | SIGLEC7      | 0.3079 |
| ENSP00000265807 | SH2D4A       | 0.3079 |
| ENSP00000238508 | SERPINB10    | 0.3079 |
| ENSP00000292641 | SCGB3A1      | 0.3079 |
| ENSP00000388920 | RWDD4        | 0.3079 |
| ENSP00000435342 | RTL1         | 0.3079 |
| ENSP00000358064 | RPRD2        | 0.3079 |
| ENSP00000443772 | RP11-87C12.2 | 0.3079 |
| ENSP00000352734 | RNF217       | 0.3079 |
| ENSP00000299563 | RNF169       | 0.3079 |
| ENSP00000268122 | RHCG         | 0.3079 |
| ENSP00000310471 | RBM4B        | 0.3079 |
| ENSP00000377948 | QRFPR        | 0.3079 |
| ENSP00000345487 | QRFPP        | 0.3079 |
| ENSP00000325958 | PTPMT1       | 0.3079 |
| ENSP00000353646 | PLEKHG4      | 0.3079 |
| ENSP00000428288 | PCDHGB4      | 0.3079 |
| ENSP00000306100 | PAM          | 0.3079 |
| ENSP00000365678 | OTUD1        | 0.3079 |
| ENSP00000332500 | OR4N4        | 0.3079 |
| ENSP00000233027 | NEK4         | 0.3079 |
| ENSP00000250144 | MMP28        | 0.3079 |
| ENSP00000384690 | MMD2         | 0.3079 |
| ENSP00000285599 | MAN2B2       | 0.3079 |
| ENSP00000287748 | LYZL4        | 0.3079 |
| ENSP00000338727 | LRRFIP2      | 0.3079 |
| ENSP00000354001 | KRTAP12-2    | 0.3079 |
| ENSP00000377570 | KRT34        | 0.3079 |
| ENSP00000470555 | KLK13        | 0.3079 |
| ENSP00000262032 | IKZF4        | 0.3079 |
| ENSP00000268389 | IGSF6        | 0.3079 |
| ENSP00000246896 | HTN1         | 0.3079 |
| ENSP00000381220 | HDDC2        | 0.3079 |

|                 |            |        |
|-----------------|------------|--------|
| ENSP00000412315 | GSKIP      | 0.3079 |
| ENSP00000353465 | GSDMB      | 0.3079 |
| ENSP00000297146 | GPR85      | 0.3079 |
| ENSP00000361110 | GBGT1      | 0.3079 |
| ENSP00000417509 | FAM208A    | 0.3079 |
| ENSP00000395249 | FAM134A    | 0.3079 |
| ENSP00000277165 | FAM120A    | 0.3079 |
| ENSP00000296380 | EXO5       | 0.3079 |
| ENSP00000350336 | DSCR8      | 0.3079 |
| ENSP00000262424 | CRISPLD2   | 0.3079 |
| ENSP00000291495 | CILP2      | 0.3079 |
| ENSP00000281882 | CFC1B      | 0.3079 |
| ENSP00000321005 | CD300LG    | 0.3079 |
| ENSP00000409197 | CCL14      | 0.3079 |
| ENSP00000400592 | CASP16     | 0.3079 |
| ENSP00000290363 | C1orf51    | 0.3079 |
| ENSP00000244519 | BTN3A3     | 0.3079 |
| ENSP00000261658 | BFAR       | 0.3079 |
| ENSP00000319062 | BBS12      | 0.3079 |
| ENSP00000368528 | APOO       | 0.3079 |
| ENSP00000196548 | ZNF8       | 0.3053 |
| ENSP00000396857 | ZNF697     | 0.3053 |
| ENSP00000312277 | ZNF507     | 0.3053 |
| ENSP00000219478 | ZNF500     | 0.3053 |
| ENSP00000311183 | ZNF497     | 0.3053 |
| ENSP00000326249 | ZNF454     | 0.3053 |
| ENSP00000252979 | ZNF337     | 0.3053 |
| ENSP00000343140 | XIRP1      | 0.3053 |
| ENSP00000013070 | UBR7       | 0.3053 |
| ENSP00000272395 | TRIM43     | 0.3053 |
| ENSP00000397773 | TMEM50B    | 0.3053 |
| ENSP00000253047 | TMEM160    | 0.3053 |
| ENSP00000261226 | TMCC3      | 0.3053 |
| ENSP00000275198 | TAAR6      | 0.3053 |
| ENSP00000346130 | SVIP       | 0.3053 |
| ENSP00000417583 | ST6GALNAC5 | 0.3053 |
| ENSP00000237536 | SOGA1      | 0.3053 |
| ENSP00000236495 | SLC5A9     | 0.3053 |
| ENSP00000379008 | SLC5A10    | 0.3053 |
| ENSP00000350475 | SLC4A5     | 0.3053 |
| ENSP00000428316 | SERPINE3   | 0.3053 |
| ENSP00000383155 | SELM       | 0.3053 |
| ENSP00000353094 | SDF4       | 0.3053 |
| ENSP00000295704 | RNF25      | 0.3053 |
| ENSP00000006777 | RHBDD2     | 0.3053 |
| ENSP00000340610 | POTEH      | 0.3053 |
| ENSP00000308315 | PODN       | 0.3053 |
| ENSP00000468678 | PLEKHH3    | 0.3053 |
| ENSP00000429273 | PCDHGB1    | 0.3053 |
| ENSP00000380153 | OR51E2     | 0.3053 |
| ENSP00000290291 | OGFR       | 0.3053 |
| ENSP00000423014 | OCIAD2     | 0.3053 |
| ENSP00000363894 | NIPSNAP3B  | 0.3053 |

|                 |           |        |
|-----------------|-----------|--------|
| ENSP00000309782 | MRGPRF    | 0.3053 |
| ENSP00000347821 | MORC4     | 0.3053 |
| ENSP00000265026 | MAP3K13   | 0.3053 |
| ENSP00000301046 | LALBA     | 0.3053 |
| ENSP00000203629 | LAG3      | 0.3053 |
| ENSP00000353742 | KRTAP26-1 | 0.3053 |
| ENSP00000250351 | KLK12     | 0.3053 |
| ENSP00000311746 | KLK10     | 0.3053 |
| ENSP00000358265 | KLHL32    | 0.3053 |
| ENSP00000420659 | KLHL29    | 0.3053 |
| ENSP00000257572 | HRK       | 0.3053 |
| ENSP00000362746 | GPR21     | 0.3053 |
| ENSP00000273352 | GPR128    | 0.3053 |
| ENSP00000370767 | GP2       | 0.3053 |
| ENSP00000454322 | GOLGA8F   | 0.3053 |
| ENSP00000408132 | GOLGA6B   | 0.3053 |
| ENSP00000354053 | GLT8D2    | 0.3053 |
| ENSP00000302552 | GLOD5     | 0.3053 |
| ENSP00000334940 | GGN       | 0.3053 |
| ENSP00000384742 | GAGE2E    | 0.3053 |
| ENSP00000369604 | FBXO16    | 0.3053 |
| ENSP00000394405 | FAM213B   | 0.3053 |
| ENSP00000355264 | FAM111A   | 0.3053 |
| ENSP00000182096 | CRYBG3    | 0.3053 |
| ENSP00000374562 | COX16     | 0.3053 |
| ENSP00000348054 | COMMD6    | 0.3053 |
| ENSP00000335605 | CMTM7     | 0.3053 |
| ENSP00000249806 | CLN6      | 0.3053 |
| ENSP00000261944 | CDHR2     | 0.3053 |
| ENSP00000291691 | C21orf58  | 0.3053 |
| ENSP00000286732 | C15orf26  | 0.3053 |
| ENSP00000421169 | BEND4     | 0.3053 |
| ENSP00000363575 | FXVD4     | 0.3053 |
| ENSP00000379684 | ZNF813    | 0.3026 |
| ENSP00000301744 | ZNF597    | 0.3026 |
| ENSP00000301399 | ZNF577    | 0.3026 |
| ENSP00000247956 | ZNF317    | 0.3026 |
| ENSP00000337724 | ZNF202    | 0.3026 |
| ENSP00000363344 | ZFP37     | 0.3026 |
| ENSP00000361748 | ZDHHC12   | 0.3026 |
| ENSP00000324763 | WFIKKN1   | 0.3026 |
| ENSP00000254442 | WDR7      | 0.3026 |
| ENSP00000365536 | WDR45     | 0.3026 |
| ENSP00000285805 | TRIM74    | 0.3026 |
| ENSP00000402414 | TRIM48    | 0.3026 |
| ENSP00000376227 | TMEM44    | 0.3026 |
| ENSP00000275767 | TMEM140   | 0.3026 |
| ENSP00000408581 | TMEM132D  | 0.3026 |
| ENSP00000416050 | TM2D2     | 0.3026 |
| ENSP00000315630 | SWAP70    | 0.3026 |
| ENSP00000339221 | SULT1A4   | 0.3026 |
| ENSP00000377717 | ST3GAL6   | 0.3026 |
| ENSP00000298396 | SSX3      | 0.3026 |

|                 |           |        |
|-----------------|-----------|--------|
| ENSP00000387266 | SPIRE1    | 0.3026 |
| ENSP00000355900 | SPATA17   | 0.3026 |
| ENSP00000329287 | SNN       | 0.3026 |
| ENSP00000326671 | SLC47A2   | 0.3026 |
| ENSP00000306328 | SLC25A33  | 0.3026 |
| ENSP00000340402 | SLC15A5   | 0.3026 |
| ENSP00000269491 | SERPINB12 | 0.3026 |
| ENSP00000387187 | SERF2     | 0.3026 |
| ENSP00000377751 | SCOC      | 0.3026 |
| ENSP00000307275 | SCAMP3    | 0.3026 |
| ENSP00000344822 | S100A13   | 0.3026 |
| ENSP00000334134 | RGS9BP    | 0.3026 |
| ENSP00000224600 | RBP3      | 0.3026 |
| ENSP00000317445 | PSAPL1    | 0.3026 |
| ENSP00000293851 | PRSS33    | 0.3026 |
| ENSP00000344961 | PLEKHG7   | 0.3026 |
| ENSP00000253255 | PKDREJ    | 0.3026 |
| ENSP00000362643 | PHKA1     | 0.3026 |
| ENSP00000387523 | OR7E24    | 0.3026 |
| ENSP00000232603 | MORC1     | 0.3026 |
| ENSP00000363348 | MNF1      | 0.3026 |
| ENSP00000393099 | MAPKBP1   | 0.3026 |
| ENSP00000362244 | MAP7D1    | 0.3026 |
| ENSP00000350592 | MAGEA12   | 0.3026 |
| ENSP00000472039 | LSP1      | 0.3026 |
| ENSP00000338887 | LRRC8D    | 0.3026 |
| ENSP00000353346 | LHFPL5    | 0.3026 |
| ENSP00000257901 | KRT85     | 0.3026 |
| ENSP00000342710 | KRT77     | 0.3026 |
| ENSP00000314608 | KLHL11    | 0.3026 |
| ENSP00000370842 | IL33      | 0.3026 |
| ENSP00000267015 | GPR84     | 0.3026 |
| ENSP00000458130 | GOLGA8G   | 0.3026 |
| ENSP00000403802 | FBXO10    | 0.3026 |
| ENSP00000236980 | FASTKD2   | 0.3026 |
| ENSP00000373360 | FAM131A   | 0.3026 |
| ENSP00000334314 | EML1      | 0.3026 |
| ENSP00000376952 | EME1      | 0.3026 |
| ENSP00000303532 | DEFB4A    | 0.3026 |
| ENSP00000365492 | DEFB119   | 0.3026 |
| ENSP00000346483 | DDRKG1    | 0.3026 |
| ENSP00000295542 | DCST1     | 0.3026 |
| ENSP00000282018 | CYSLTR2   | 0.3026 |
| ENSP00000278980 | COMMD7    | 0.3026 |
| ENSP00000323782 | CCDC43    | 0.3026 |
| ENSP00000348933 | CCDC25    | 0.3026 |
| ENSP00000350011 | C7orf50   | 0.3026 |
| ENSP00000278174 | BTBD10    | 0.3026 |
| ENSP00000359045 | ARHGAP4   | 0.3026 |
| ENSP00000262219 | ANXA13    | 0.3026 |
| ENSP00000409126 | ANO6      | 0.3026 |
| ENSP00000296657 | ANKRD33B  | 0.3026 |
| ENSP00000175238 | ADAM7     | 0.3026 |

|                 |            |        |
|-----------------|------------|--------|
| ENSP00000380254 | AC007390.5 | 0.3026 |
| ENSP00000317614 | ZNF518B    | 0.3000 |
| ENSP00000375656 | ZNF321P    | 0.3000 |
| ENSP00000278319 | ZNF215     | 0.3000 |
| ENSP00000245663 | ZBTB46     | 0.3000 |
| ENSP00000250101 | TXNDC17    | 0.3000 |
| ENSP00000434279 | TMPRSS13   | 0.3000 |
| ENSP00000274532 | TIMD4      | 0.3000 |
| ENSP00000321343 | ST8SIA5    | 0.3000 |
| ENSP00000320431 | ST8SIA3    | 0.3000 |
| ENSP00000376423 | SPRR2A     | 0.3000 |
| ENSP00000264694 | SNX25      | 0.3000 |
| ENSP00000299709 | SLC38A8    | 0.3000 |
| ENSP00000376150 | SLC16A3    | 0.3000 |
| ENSP00000276033 | SLC16A2    | 0.3000 |
| ENSP00000418813 | SELK       | 0.3000 |
| ENSP00000342935 | SDCBP2     | 0.3000 |
| ENSP00000354733 | SBNO2      | 0.3000 |
| ENSP00000335397 | RTN4RL2    | 0.3000 |
| ENSP00000308193 | RNASEH2C   | 0.3000 |
| ENSP00000356329 | RAET1G     | 0.3000 |
| ENSP00000317903 | R3HDM2     | 0.3000 |
| ENSP00000234453 | PLEKHA3    | 0.3000 |
| ENSP00000346802 | PCDHB11    | 0.3000 |
| ENSP00000330384 | OR6A2      | 0.3000 |
| ENSP00000322273 | OLFML3     | 0.3000 |
| ENSP00000308717 | MRPL48     | 0.3000 |
| ENSP00000332124 | MRC1L1     | 0.3000 |
| ENSP00000304553 | MPLKIP     | 0.3000 |
| ENSP00000445859 | MPHOSPH9   | 0.3000 |
| ENSP00000245615 | MBOAT7     | 0.3000 |
| ENSP00000395962 | MAGED4B    | 0.3000 |
| ENSP00000368266 | MAGEB4     | 0.3000 |
| ENSP00000367891 | LGALS7     | 0.3000 |
| ENSP00000375236 | KRTAP4-7   | 0.3000 |
| ENSP00000331242 | KREMEN1    | 0.3000 |
| ENSP00000386787 | KIAA0922   | 0.3000 |
| ENSP00000379441 | JMY        | 0.3000 |
| ENSP00000264952 | GRK7       | 0.3000 |
| ENSP00000335158 | GPR142     | 0.3000 |
| ENSP00000170564 | GPATCH1    | 0.3000 |
| ENSP00000246553 | FFAR1      | 0.3000 |
| ENSP00000337510 | FBXO40     | 0.3000 |
| ENSP00000386895 | FAM124B    | 0.3000 |
| ENSP00000472280 | EMR2       | 0.3000 |
| ENSP00000365103 | DAOA       | 0.3000 |
| ENSP00000319141 | CYBRD1     | 0.3000 |
| ENSP00000313759 | CTC1       | 0.3000 |
| ENSP00000370021 | CNTLN      | 0.3000 |
| ENSP00000206423 | CCDC80     | 0.3000 |
| ENSP00000416797 | CAMSAP3    | 0.3000 |
| ENSP00000297623 | C9orf24    | 0.3000 |
| ENSP00000295898 | C4orf36    | 0.3000 |

|                 |           |        |
|-----------------|-----------|--------|
| ENSP00000245957 | C20orf26  | 0.3000 |
| ENSP00000318883 | BCL2L13   | 0.3000 |
| ENSP00000286918 | ANKRD9    | 0.3000 |
| ENSP00000251089 | ANGEL1    | 0.3000 |
| ENSP00000252744 | ZSWIM6    | 0.2974 |
| ENSP00000330838 | ZNF775    | 0.2974 |
| ENSP00000375598 | ZNF628    | 0.2974 |
| ENSP00000306869 | ZNF565    | 0.2974 |
| ENSP00000472802 | ZNF446    | 0.2974 |
| ENSP00000340494 | ZNF395    | 0.2974 |
| ENSP00000252211 | ZKSCAN3   | 0.2974 |
| ENSP00000442373 | ZDHHHC11B | 0.2974 |
| ENSP00000339918 | XRRA1     | 0.2974 |
| ENSP00000326379 | VWA9      | 0.2974 |
| ENSP00000374501 | UVSSA     | 0.2974 |
| ENSP00000221399 | TULP2     | 0.2974 |
| ENSP00000395086 | TRIM51    | 0.2974 |
| ENSP00000256649 | TRIM45    | 0.2974 |
| ENSP00000339659 | TRIM2     | 0.2974 |
| ENSP00000335144 | TPGS2     | 0.2974 |
| ENSP00000359222 | TMEM56    | 0.2974 |
| ENSP00000358430 | TECTB     | 0.2974 |
| ENSP00000366549 | ST3GAL5   | 0.2974 |
| ENSP00000345477 | ST3GAL2   | 0.2974 |
| ENSP00000381480 | SPAG11B   | 0.2974 |
| ENSP00000323435 | SNX22     | 0.2974 |
| ENSP00000273158 | SLC25A38  | 0.2974 |
| ENSP00000307369 | SHE       | 0.2974 |
| ENSP00000441927 | SESN3     | 0.2974 |
| ENSP00000302579 | SCEL      | 0.2974 |
| ENSP00000352427 | RGR       | 0.2974 |
| ENSP00000383096 | RFPL2     | 0.2974 |
| ENSP00000270645 | RCN3      | 0.2974 |
| ENSP00000295588 | POGLUT1   | 0.2974 |
| ENSP00000429601 | PCDHGA6   | 0.2974 |
| ENSP00000239450 | PCDHB12   | 0.2974 |
| ENSP00000394936 | ORM2      | 0.2974 |
| ENSP00000376615 | NT5DC3    | 0.2974 |
| ENSP00000259953 | NRM       | 0.2974 |
| ENSP00000357798 | MMP21     | 0.2974 |
| ENSP00000273286 | LRTM1     | 0.2974 |
| ENSP00000339621 | LCN6      | 0.2974 |
| ENSP00000261588 | KIAA0556  | 0.2974 |
| ENSP00000258180 | KIAA0513  | 0.2974 |
| ENSP00000345667 | ILDR1     | 0.2974 |
| ENSP00000407107 | HHLA1     | 0.2974 |
| ENSP00000384582 | GPR98     | 0.2974 |
| ENSP00000399563 | GPR89C    | 0.2974 |
| ENSP00000378195 | GPR75     | 0.2974 |
| ENSP00000284311 | GPR15     | 0.2974 |
| ENSP00000417354 | GOLIM4    | 0.2974 |
| ENSP00000287957 | GATAD1    | 0.2974 |
| ENSP00000357540 | FUOM      | 0.2974 |

|                 |               |        |
|-----------------|---------------|--------|
| ENSP00000365569 | FLOT1         | 0.2974 |
| ENSP00000359410 | EPHX4         | 0.2974 |
| ENSP00000306105 | CEP89         | 0.2974 |
| ENSP00000361189 | CDHR1         | 0.2974 |
| ENSP00000309376 | CD164         | 0.2974 |
| ENSP00000306522 | CAMTA1        | 0.2974 |
| ENSP00000262947 | C19orf10      | 0.2974 |
| ENSP00000300091 | C18orf54      | 0.2974 |
| ENSP00000349143 | BTN2A2        | 0.2974 |
| ENSP00000386121 | BTBD9         | 0.2974 |
| ENSP00000253354 | BPIFB1        | 0.2974 |
| ENSP00000319974 | BBX           | 0.2974 |
| ENSP00000281437 | BARX2         | 0.2974 |
| ENSP00000472450 | BAGE5         | 0.2974 |
| ENSP00000312700 | B3GNT8        | 0.2974 |
| ENSP00000319636 | B3GNT4        | 0.2974 |
| ENSP00000298815 | ARHGAP42      | 0.2974 |
| ENSP00000301945 | ANTXR1        | 0.2974 |
| ENSP00000342295 | ANKRD55       | 0.2974 |
| ENSP00000351875 | ANKRD30B      | 0.2974 |
| ENSP00000343021 | ALKBH2        | 0.2974 |
| ENSP00000258884 | ABHD17C       | 0.2974 |
| ENSP00000324450 | ZSCAN20       | 0.2974 |
| ENSP00000319053 | ZNF77         | 0.2947 |
| ENSP00000301480 | ZNF560        | 0.2947 |
| ENSP00000357323 | YY1AP1        | 0.2947 |
| ENSP00000282507 | UGT3A2        | 0.2947 |
| ENSP00000321987 | TSPEAR        | 0.2947 |
| ENSP00000267970 | TSPAN3        | 0.2947 |
| ENSP00000282369 | TRIM36        | 0.2947 |
| ENSP00000385470 | TNFSF18       | 0.2947 |
| ENSP00000295694 | TMEM79        | 0.2947 |
| ENSP00000358948 | TEX28P1       | 0.2947 |
| ENSP00000380779 | TCTN1         | 0.2947 |
| ENSP00000352463 | TCF20         | 0.2947 |
| ENSP00000356470 | SWT1          | 0.2947 |
| ENSP00000427401 | SREK1IP1      | 0.2947 |
| ENSP00000365830 | SOWAHC        | 0.2947 |
| ENSP00000338988 | SLMO1         | 0.2947 |
| ENSP00000336887 | SLC39A9       | 0.2947 |
| ENSP00000348211 | SLC25A46      | 0.2947 |
| ENSP00000386348 | SAPCD2        | 0.2947 |
| ENSP00000457682 | RP11-458D21.5 | 0.2947 |
| ENSP00000340578 | RASSF6        | 0.2947 |
| ENSP00000306390 | PRSS27        | 0.2947 |
| ENSP00000420686 | PLCXD2        | 0.2947 |
| ENSP00000258042 | NMBR          | 0.2947 |
| ENSP00000321976 | NKPD1         | 0.2947 |
| ENSP00000298687 | NDRG2         | 0.2947 |
| ENSP00000363557 | MYOM3         | 0.2947 |
| ENSP00000380531 | MRPS34        | 0.2947 |
| ENSP00000354415 | MICU1         | 0.2947 |
| ENSP00000341543 | METTL23       | 0.2947 |



|                 |          |        |
|-----------------|----------|--------|
| ENSP00000343298 | LRRC41   | 0.2947 |
| ENSP00000339251 | KRTDAP   | 0.2947 |
| ENSP00000361373 | KLF17    | 0.2947 |
| ENSP00000281830 | KCNE4    | 0.2947 |
| ENSP00000347504 | ITGB1BP1 | 0.2947 |
| ENSP00000395219 | IGFL2    | 0.2947 |
| ENSP00000357791 | HRNR     | 0.2947 |
| ENSP00000359899 | HCRTR2   | 0.2947 |
| ENSP00000308908 | GPR148   | 0.2947 |
| ENSP00000403067 | FRMD5    | 0.2947 |
| ENSP00000321927 | FBXL13   | 0.2947 |
| ENSP00000349805 | FAM212B  | 0.2947 |
| ENSP00000358251 | FAM160B1 | 0.2947 |
| ENSP00000350651 | ERI2     | 0.2947 |
| ENSP00000333823 | EFHC2    | 0.2947 |
| ENSP00000364271 | DFNB59   | 0.2947 |
| ENSP00000335382 | DEFB128  | 0.2947 |
| ENSP00000367248 | CD177    | 0.2947 |
| ENSP00000293276 | CCL15    | 0.2947 |
| ENSP00000362704 | CCDC28B  | 0.2947 |
| ENSP00000288065 | ARMC12   | 0.2947 |
| ENSP00000282849 | ADAMTS18 | 0.2947 |
| ENSP00000362304 | ADAMTS14 | 0.2947 |
| ENSP00000200557 | ADAM11   | 0.2947 |
| ENSP00000358241 | ACP6     | 0.2947 |
| ENSP00000332595 | ZNF92    | 0.2921 |
| ENSP00000270451 | ZNF581   | 0.2921 |
| ENSP00000363556 | ZNF32    | 0.2921 |
| ENSP00000366902 | ZBTB48   | 0.2921 |
| ENSP00000388299 | TRIM49C  | 0.2921 |
| ENSP00000296529 | TMEM144  | 0.2921 |
| ENSP00000400471 | TMEM106C | 0.2921 |
| ENSP00000468046 | TCEB3CL2 | 0.2921 |
| ENSP00000325564 | SYCN     | 0.2921 |
| ENSP00000231461 | ST8SIA4  | 0.2921 |
| ENSP00000299977 | SLFN5    | 0.2921 |
| ENSP00000260126 | SLCO5A1  | 0.2921 |
| ENSP00000217909 | SLC25A43 | 0.2921 |
| ENSP00000294454 | SLC25A34 | 0.2921 |
| ENSP00000352028 | SH3RF2   | 0.2921 |
| ENSP00000284637 | SH3RF1   | 0.2921 |
| ENSP00000340237 | SH3BP4   | 0.2921 |
| ENSP00000330930 | SGK223   | 0.2921 |
| ENSP00000387361 | SBNO1    | 0.2921 |
| ENSP00000349359 | SASH3    | 0.2921 |
| ENSP00000297186 | RSPH10B2 | 0.2921 |
| ENSP00000255324 | RNF17    | 0.2921 |
| ENSP00000345151 | RFPL4AL1 | 0.2921 |
| ENSP00000345826 | PMEPA1   | 0.2921 |
| ENSP00000252590 | PLVAP    | 0.2921 |
| ENSP00000380155 | OR51E1   | 0.2921 |
| ENSP00000358951 | OPN1MW   | 0.2921 |
| ENSP00000338352 | NUDT4    | 0.2921 |

|                 |           |        |
|-----------------|-----------|--------|
| ENSP00000399903 | NBEAL1    | 0.2921 |
| ENSP00000356265 | NAV1      | 0.2921 |
| ENSP00000356115 | MFSD4     | 0.2921 |
| ENSP00000354920 | METTL13   | 0.2921 |
| ENSP00000314484 | MEIOB     | 0.2921 |
| ENSP00000367486 | MEIG1     | 0.2921 |
| ENSP00000385727 | MAST4     | 0.2921 |
| ENSP00000286482 | MAGEA8    | 0.2921 |
| ENSP00000246529 | LRFN3     | 0.2921 |
| ENSP00000382584 | KRTAP5-5  | 0.2921 |
| ENSP00000375232 | KRTAP4-11 | 0.2921 |
| ENSP00000375475 | KRTAP12-1 | 0.2921 |
| ENSP00000347532 | KIAA1598  | 0.2921 |
| ENSP00000367459 | KIAA0319  | 0.2921 |
| ENSP00000294725 | KCNT2     | 0.2921 |
| ENSP00000319918 | ITFG1     | 0.2921 |
| ENSP00000328111 | IL25      | 0.2921 |
| ENSP00000417492 | FSD1L     | 0.2921 |
| ENSP00000373370 | FLG2      | 0.2921 |
| ENSP00000356925 | FCRLB     | 0.2921 |
| ENSP00000323635 | FAM210A   | 0.2921 |
| ENSP00000310565 | DSEL      | 0.2921 |
| ENSP00000427336 | DIO3      | 0.2921 |
| ENSP00000363624 | CUTA      | 0.2921 |
| ENSP00000332716 | CCDC28A   | 0.2921 |
| ENSP00000362507 | CCDC167   | 0.2921 |
| ENSP00000398526 | BBS1      | 0.2921 |
| ENSP00000367453 | ACBD7     | 0.2921 |
| ENSP00000292450 | ZSCAN21   | 0.2895 |
| ENSP00000416662 | ZNF713    | 0.2895 |
| ENSP00000354686 | ZNF652    | 0.2895 |
| ENSP00000340749 | ZNF124    | 0.2895 |
| ENSP00000283441 | ZDHHC11   | 0.2895 |
| ENSP00000269346 | TTYH2     | 0.2895 |
| ENSP00000360323 | TTC22     | 0.2895 |
| ENSP00000431987 | TRIM64C   | 0.2895 |
| ENSP00000327994 | TRIM50    | 0.2895 |
| ENSP00000409231 | TRAPPC13  | 0.2895 |
| ENSP00000057513 | TNIP3     | 0.2895 |
| ENSP00000341364 | TMEM230   | 0.2895 |
| ENSP00000346954 | TMEM205   | 0.2895 |
| ENSP00000304277 | TM4SF1    | 0.2895 |
| ENSP00000441949 | TAS2R14   | 0.2895 |
| ENSP00000258381 | SP110     | 0.2895 |
| ENSP00000276373 | SLC18A1   | 0.2895 |
| ENSP00000401502 | SIGLEC6   | 0.2895 |
| ENSP00000023939 | RTFDC1    | 0.2895 |
| ENSP00000420465 | RNF182    | 0.2895 |
| ENSP00000307096 | RNASE4    | 0.2895 |
| ENSP00000334851 | RGS7BP    | 0.2895 |
| ENSP00000233735 | REG1A     | 0.2895 |
| ENSP00000294484 | PTCHD2    | 0.2895 |
| ENSP00000359234 | PDZD7     | 0.2895 |

|                 |          |        |
|-----------------|----------|--------|
| ENSP00000228820 | PARP11   | 0.2895 |
| ENSP00000377778 | MIEN1    | 0.2895 |
| ENSP00000343118 | LAMTOR4  | 0.2895 |
| ENSP00000456743 | KLHL36   | 0.2895 |
| ENSP00000085068 | ISOC2    | 0.2895 |
| ENSP00000288167 | IL17RB   | 0.2895 |
| ENSP00000454407 | GOLGA6L2 | 0.2895 |
| ENSP00000294671 | GBP7     | 0.2895 |
| ENSP00000309432 | FAM134C  | 0.2895 |
| ENSP00000267113 | ESYT1    | 0.2895 |
| ENSP00000267889 | DISP2    | 0.2895 |
| ENSP00000297056 | DAGLB    | 0.2895 |
| ENSP00000312099 | CRYGS    | 0.2895 |
| ENSP00000265085 | CPEB4    | 0.2895 |
| ENSP00000288040 | CLEC18A  | 0.2895 |
| ENSP00000362601 | CHIC1    | 0.2895 |
| ENSP00000353259 | CD300A   | 0.2895 |
| ENSP00000384193 | CADM2    | 0.2895 |
| ENSP00000423049 | C5orf27  | 0.2895 |
| ENSP00000333737 | C1QTNF9  | 0.2895 |
| ENSP00000338812 | C1QTNF6  | 0.2895 |
| ENSP00000324510 | BAIAP3   | 0.2895 |
| ENSP00000323479 | B3GALNT1 | 0.2895 |
| ENSP00000406381 | APOC4    | 0.2895 |
| ENSP00000365063 | ABHD13   | 0.2895 |
| ENSP00000429148 | ZNF674   | 0.2868 |
| ENSP00000282286 | ZNF304   | 0.2868 |
| ENSP00000391067 | ZNF302   | 0.2868 |
| ENSP00000395723 | ZNF200   | 0.2868 |
| ENSP00000269834 | ZIM3     | 0.2868 |
| ENSP00000363972 | ZC4H2    | 0.2868 |
| ENSP00000263243 | ZC3H7B   | 0.2868 |
| ENSP00000340839 | ZC3H12B  | 0.2868 |
| ENSP00000398211 | TTC21A   | 0.2868 |
| ENSP00000262067 | TSPAN13  | 0.2868 |
| ENSP00000302144 | TMEM154  | 0.2868 |
| ENSP00000296736 | TIGD6    | 0.2868 |
| ENSP00000020926 | SYT13    | 0.2868 |
| ENSP00000344219 | SUSD4    | 0.2868 |
| ENSP00000168148 | SPP2     | 0.2868 |
| ENSP00000324870 | SPINK6   | 0.2868 |
| ENSP00000341765 | SPATA16  | 0.2868 |
| ENSP00000358715 | SORCS3   | 0.2868 |
| ENSP00000246515 | SLURP1   | 0.2868 |
| ENSP00000369135 | SLCO6A1  | 0.2868 |
| ENSP00000242275 | SLC25A51 | 0.2868 |
| ENSP00000371729 | SACS     | 0.2868 |
| ENSP00000297157 | RP9      | 0.2868 |
| ENSP00000357229 | RHBG     | 0.2868 |
| ENSP00000357882 | PSTK     | 0.2868 |
| ENSP00000245810 | PSPN     | 0.2868 |
| ENSP00000300835 | PRR14    | 0.2868 |
| ENSP00000399679 | PRG4     | 0.2868 |

|                 |              |        |
|-----------------|--------------|--------|
| ENSP00000318131 | PNMAL1       | 0.2868 |
| ENSP00000358945 | OPN1MW2      | 0.2868 |
| ENSP00000262283 | OC90         | 0.2868 |
| ENSP00000401177 | NOL8         | 0.2868 |
| ENSP00000253247 | NOL11        | 0.2868 |
| ENSP00000386227 | MCC          | 0.2868 |
| ENSP00000376246 | MB21D2       | 0.2868 |
| ENSP00000273390 | MAATS1       | 0.2868 |
| ENSP00000380605 | LYPD1        | 0.2868 |
| ENSP00000361185 | LRIT2        | 0.2868 |
| ENSP00000357810 | LINGO4       | 0.2868 |
| ENSP00000315997 | LILRB1       | 0.2868 |
| ENSP00000274507 | LECT2        | 0.2868 |
| ENSP00000305975 | KRTAP1-1     | 0.2868 |
| ENSP00000260191 | HTR3B        | 0.2868 |
| ENSP00000446205 | HES7         | 0.2868 |
| ENSP00000234142 | GREB1        | 0.2868 |
| ENSP00000384345 | GPR1         | 0.2868 |
| ENSP00000380037 | FITM2        | 0.2868 |
| ENSP00000270879 | FCN3         | 0.2868 |
| ENSP00000331044 | ENKUR        | 0.2868 |
| ENSP00000354579 | CMTM3        | 0.2868 |
| ENSP00000219400 | CMC2         | 0.2868 |
| ENSP00000367265 | CKAP4        | 0.2868 |
| ENSP00000338783 | CHST5        | 0.2868 |
| ENSP00000221992 | CEACAM5      | 0.2868 |
| ENSP00000385576 | CEACAM16     | 0.2868 |
| ENSP00000357150 | CD1B         | 0.2868 |
| ENSP00000295117 | CCDC104      | 0.2868 |
| ENSP00000367471 | BTBD3        | 0.2868 |
| ENSP00000256538 | ATPBD4       | 0.2868 |
| ENSP00000442477 | ASIC5        | 0.2868 |
| ENSP00000435517 | ALG9         | 0.2868 |
| ENSP00000267499 | ADAM21       | 0.2868 |
| ENSP00000268624 | ADAD2        | 0.2868 |
| ENSP00000342002 | ZNF93        | 0.2842 |
| ENSP00000301096 | ZNF83        | 0.2842 |
| ENSP00000341151 | ZNF81        | 0.2842 |
| ENSP00000415836 | ZNF276       | 0.2842 |
| ENSP00000344616 | ZAR1L        | 0.2842 |
| ENSP00000318684 | VSIG2        | 0.2842 |
| ENSP00000328998 | TRAK1        | 0.2842 |
| ENSP00000249700 | TMOD2        | 0.2842 |
| ENSP00000354441 | TMEM184B     | 0.2842 |
| ENSP00000371364 | TMEM156      | 0.2842 |
| ENSP00000429275 | TMEM125      | 0.2842 |
| ENSP00000409932 | TCEB3CL      | 0.2842 |
| ENSP00000355273 | ST6GAL2      | 0.2842 |
| ENSP00000345964 | SORCS1       | 0.2842 |
| ENSP00000024061 | SLC45A4      | 0.2842 |
| ENSP00000316007 | SCAMP4       | 0.2842 |
| ENSP00000434508 | RP11-849H4.2 | 0.2842 |
| ENSP00000302046 | RNASE6       | 0.2842 |

|                 |           |        |
|-----------------|-----------|--------|
| ENSP00000397644 | RFX7      | 0.2842 |
| ENSP00000424261 | PTTG2     | 0.2842 |
| ENSP00000387261 | PSTPIP2   | 0.2842 |
| ENSP00000401701 | PRSS42    | 0.2842 |
| ENSP00000345359 | PODXL2    | 0.2842 |
| ENSP00000460274 | PCDHGA9   | 0.2842 |
| ENSP00000454411 | OST4      | 0.2842 |
| ENSP00000457071 | MPV17L    | 0.2842 |
| ENSP00000368304 | MAGEB10   | 0.2842 |
| ENSP00000299194 | LRTM2     | 0.2842 |
| ENSP00000399441 | LRRC70    | 0.2842 |
| ENSP00000261247 | JKAMP     | 0.2842 |
| ENSP00000295981 | IL17RC    | 0.2842 |
| ENSP00000321184 | IGSF3     | 0.2842 |
| ENSP00000365601 | IDNK      | 0.2842 |
| ENSP00000004982 | HSPB6     | 0.2842 |
| ENSP00000362094 | GTSF1L    | 0.2842 |
| ENSP00000295500 | GPR155    | 0.2842 |
| ENSP00000263384 | FAM32A    | 0.2842 |
| ENSP00000385158 | FAM161A   | 0.2842 |
| ENSP00000257013 | FAM127A   | 0.2842 |
| ENSP00000278903 | EI24      | 0.2842 |
| ENSP00000381921 | DSCR4     | 0.2842 |
| ENSP00000360803 | DNLZ      | 0.2842 |
| ENSP00000334681 | DEFB107A  | 0.2842 |
| ENSP00000316496 | DCAF4L2   | 0.2842 |
| ENSP00000358763 | CHI3L2    | 0.2842 |
| ENSP00000259053 | CD302     | 0.2842 |
| ENSP00000349967 | CCRL2     | 0.2842 |
| ENSP00000372576 | CCDC178   | 0.2842 |
| ENSP00000354769 | C1orf68   | 0.2842 |
| ENSP00000300618 | C17orf78  | 0.2842 |
| ENSP00000344609 | BTG3      | 0.2842 |
| ENSP00000374359 | ZXDC      | 0.2816 |
| ENSP00000308548 | ZNHIT2    | 0.2816 |
| ENSP00000405218 | ZNF347    | 0.2816 |
| ENSP00000328732 | ZBTB7C    | 0.2816 |
| ENSP00000264234 | UPK1B     | 0.2816 |
| ENSP00000361072 | TSPAN1    | 0.2816 |
| ENSP00000211076 | TPSD1     | 0.2816 |
| ENSP00000312309 | TNK1      | 0.2816 |
| ENSP00000331827 | TNFAIP8L1 | 0.2816 |
| ENSP00000301939 | TMEM256   | 0.2816 |
| ENSP00000281924 | TMEM163   | 0.2816 |
| ENSP00000229563 | TMEM14C   | 0.2816 |
| ENSP00000266534 | TMEM117   | 0.2816 |
| ENSP00000308354 | TIGD3     | 0.2816 |
| ENSP00000215742 | THAP7     | 0.2816 |
| ENSP00000240619 | TAS2R10   | 0.2816 |
| ENSP00000356908 | TAAR2     | 0.2816 |
| ENSP00000304707 | SLN       | 0.2816 |
| ENSP00000355109 | SFMBT2    | 0.2816 |
| ENSP00000364965 | SECISBP2  | 0.2816 |

|                 |              |        |
|-----------------|--------------|--------|
| ENSP00000244360 | RNF39        | 0.2816 |
| ENSP00000388207 | RNF148       | 0.2816 |
| ENSP00000390630 | RIMBP3C      | 0.2816 |
| ENSP00000255476 | RFXAP        | 0.2816 |
| ENSP00000336866 | RBBP9        | 0.2816 |
| ENSP00000430307 | PRSS46       | 0.2816 |
| ENSP00000262731 | PRR5-ARHGAP8 | 0.2816 |
| ENSP00000055335 | PPP1R3F      | 0.2816 |
| ENSP00000342143 | PDZK1        | 0.2816 |
| ENSP00000347742 | PDZD3        | 0.2816 |
| ENSP00000202017 | PDRG1        | 0.2816 |
| ENSP00000334456 | OR5D14       | 0.2816 |
| ENSP00000408697 | NUGGC        | 0.2816 |
| ENSP00000405674 | NOL7         | 0.2816 |
| ENSP00000370949 | NFXL1        | 0.2816 |
| ENSP00000341637 | NCR3LG1      | 0.2816 |
| ENSP00000281513 | NBAS         | 0.2816 |
| ENSP00000362127 | MTF1         | 0.2816 |
| ENSP00000396622 | MROH7        | 0.2816 |
| ENSP00000278937 | MPZL2        | 0.2816 |
| ENSP00000216075 | MIOX         | 0.2816 |
| ENSP00000381566 | MFSD12       | 0.2816 |
| ENSP00000294635 | LRRC53       | 0.2816 |
| ENSP00000325091 | LRCH2        | 0.2816 |
| ENSP00000333952 | LCE5A        | 0.2816 |
| ENSP00000335358 | LCE3B        | 0.2816 |
| ENSP00000288350 | LCA5L        | 0.2816 |
| ENSP00000375476 | KRTAP12-4    | 0.2816 |
| ENSP00000300976 | KLHL26       | 0.2816 |
| ENSP00000336769 | KIR2DL1      | 0.2816 |
| ENSP00000374558 | KIAA0226L    | 0.2816 |
| ENSP00000456039 | INMT-FAM188B | 0.2816 |
| ENSP00000376403 | GPRC5C       | 0.2816 |
| ENSP00000270310 | FXYD7        | 0.2816 |
| ENSP00000334665 | FSCN2        | 0.2816 |
| ENSP00000360538 | FFAR4        | 0.2816 |
| ENSP00000369863 | FAM57B       | 0.2816 |
| ENSP00000291634 | FAM207A      | 0.2816 |
| ENSP00000452347 | CTB-96E2.2   | 0.2816 |
| ENSP00000419378 | CLIC3        | 0.2816 |
| ENSP00000381290 | CHTF8        | 0.2816 |
| ENSP00000384887 | CEACAM19     | 0.2816 |
| ENSP00000287097 | CD109        | 0.2816 |
| ENSP00000366656 | BX255923.1   | 0.2816 |
| ENSP00000355559 | B3GALNT2     | 0.2816 |
| ENSP00000309749 | APOBEC3F     | 0.2816 |
| ENSP00000290943 | ANKRD18B     | 0.2816 |
| ENSP00000415273 | AL353608.1   | 0.2816 |
| ENSP00000025301 | AKAP11       | 0.2816 |
| ENSP00000360973 | AGTR2        | 0.2816 |
| ENSP00000334800 | ZSCAN25      | 0.2789 |
| ENSP00000362446 | ZNF79        | 0.2789 |
| ENSP00000304769 | ZNF467       | 0.2789 |

|                 |            |        |
|-----------------|------------|--------|
| ENSP00000337363 | ZNF394     | 0.2789 |
| ENSP00000435550 | ZC2HC1C    | 0.2789 |
| ENSP00000343990 | TRIM14     | 0.2789 |
| ENSP00000323455 | TPRX1      | 0.2789 |
| ENSP00000381476 | TMPRSS12   | 0.2789 |
| ENSP00000341657 | THYN1      | 0.2789 |
| ENSP00000387593 | TANC2      | 0.2789 |
| ENSP00000273183 | STAC       | 0.2789 |
| ENSP00000336733 | ST6GALNAC4 | 0.2789 |
| ENSP00000329214 | ST6GALNAC3 | 0.2789 |
| ENSP00000369045 | SPINK4     | 0.2789 |
| ENSP00000354090 | SIGLEC14   | 0.2789 |
| ENSP00000412361 | SIGLEC11   | 0.2789 |
| ENSP00000422644 | SEPW1      | 0.2789 |
| ENSP00000260385 | RMDN3      | 0.2789 |
| ENSP00000260045 | PRKRIR     | 0.2789 |
| ENSP00000412436 | PRH1       | 0.2789 |
| ENSP00000345175 | PODNL1     | 0.2789 |
| ENSP00000428603 | PCDHGB6    | 0.2789 |
| ENSP00000431083 | PCDHGA1    | 0.2789 |
| ENSP00000367151 | PCDH17     | 0.2789 |
| ENSP00000289619 | PAGE5      | 0.2789 |
| ENSP00000316955 | OR7A5      | 0.2789 |
| ENSP00000319546 | OR2A4      | 0.2789 |
| ENSP00000308082 | OR10P1     | 0.2789 |
| ENSP00000399078 | OR10J1     | 0.2789 |
| ENSP00000264312 | OCIAD1     | 0.2789 |
| ENSP00000277746 | NRBF2      | 0.2789 |
| ENSP00000290705 | MT1A       | 0.2789 |
| ENSP00000332646 | MFSD10     | 0.2789 |
| ENSP00000362638 | MARCKSL1   | 0.2789 |
| ENSP00000329199 | MAGEA6     | 0.2789 |
| ENSP00000359483 | LRRC8C     | 0.2789 |
| ENSP00000469337 | LRRC63     | 0.2789 |
| ENSP00000358778 | LRIF1      | 0.2789 |
| ENSP00000358966 | IMPG1      | 0.2789 |
| ENSP00000357073 | IGSF9      | 0.2789 |
| ENSP00000276708 | GSDMC      | 0.2789 |
| ENSP00000300571 | GPRC5B     | 0.2789 |
| ENSP00000358233 | GPR89B     | 0.2789 |
| ENSP00000356251 | GPR37L1    | 0.2789 |
| ENSP00000335156 | GPR144     | 0.2789 |
| ENSP00000266754 | GAS2L3     | 0.2789 |
| ENSP00000359353 | GABRE      | 0.2789 |
| ENSP00000285046 | FGD5       | 0.2789 |
| ENSP00000377396 | FAM198B    | 0.2789 |
| ENSP00000359052 | FAM102B    | 0.2789 |
| ENSP00000357409 | DCST2      | 0.2789 |
| ENSP00000446100 | CMIP       | 0.2789 |
| ENSP00000234701 | CLCA1      | 0.2789 |
| ENSP00000361721 | CITED4     | 0.2789 |
| ENSP00000309270 | CHST1      | 0.2789 |
| ENSP00000310966 | CD3EAP     | 0.2789 |

|                 |          |        |
|-----------------|----------|--------|
| ENSP00000374507 | CCDC88C  | 0.2789 |
| ENSP00000350961 | C9orf123 | 0.2789 |
| ENSP00000297534 | C7orf55  | 0.2789 |
| ENSP00000328677 | C2CD4C   | 0.2789 |
| ENSP00000354553 | C1orf85  | 0.2789 |
| ENSP00000333845 | C11orf88 | 0.2789 |
| ENSP00000042931 | BEST2    | 0.2789 |
| ENSP00000358878 | AMIGO1   | 0.2789 |
| ENSP00000245812 | ALKBH7   | 0.2789 |
| ENSP00000405969 | ACBD4    | 0.2789 |
| ENSP00000410157 | ABTB2    | 0.2789 |
| ENSP00000395007 | ZNF746   | 0.2763 |
| ENSP00000428878 | ZNF721   | 0.2763 |
| ENSP00000377873 | ZNF358   | 0.2763 |
| ENSP00000461413 | ZNF286B  | 0.2763 |
| ENSP00000352920 | ZMYM1    | 0.2763 |
| ENSP00000348593 | ZFYVE27  | 0.2763 |
| ENSP00000359891 | ZDHHC16  | 0.2763 |
| ENSP00000307604 | ZBTB5    | 0.2763 |
| ENSP00000398106 | ZBED5    | 0.2763 |
| ENSP00000258243 | URB2     | 0.2763 |
| ENSP00000398003 | U82695.9 | 0.2763 |
| ENSP00000323584 | TSHZ1    | 0.2763 |
| ENSP00000422581 | TRIML2   | 0.2763 |
| ENSP00000330216 | TRIM49B  | 0.2763 |
| ENSP00000349087 | TMEM259  | 0.2763 |
| ENSP00000299308 | TMEM132B | 0.2763 |
| ENSP00000358957 | TEX28P2  | 0.2763 |
| ENSP00000324404 | TCHP     | 0.2763 |
| ENSP00000377520 | SYT12    | 0.2763 |
| ENSP00000352097 | SPTSSB   | 0.2763 |
| ENSP00000433712 | SPRN     | 0.2763 |
| ENSP00000296088 | SNRK     | 0.2763 |
| ENSP00000366288 | SLITRK1  | 0.2763 |
| ENSP00000366299 | SLC25A39 | 0.2763 |
| ENSP00000295190 | SLC16A14 | 0.2763 |
| ENSP00000369374 | SKOR1    | 0.2763 |
| ENSP00000261674 | SFSWAP   | 0.2763 |
| ENSP00000357706 | S100A5   | 0.2763 |
| ENSP00000314946 | RPRM     | 0.2763 |
| ENSP00000364476 | RIBC1    | 0.2763 |
| ENSP00000161006 | PRSS22   | 0.2763 |
| ENSP00000239032 | PRLHR    | 0.2763 |
| ENSP00000362942 | PHACTR4  | 0.2763 |
| ENSP00000378077 | PCDHGA2  | 0.2763 |
| ENSP00000431914 | OR10S1   | 0.2763 |
| ENSP00000305631 | NXNL1    | 0.2763 |
| ENSP00000337443 | NXN      | 0.2763 |
| ENSP00000318154 | MRFAP1L1 | 0.2763 |
| ENSP00000301920 | MMADHC   | 0.2763 |
| ENSP00000263369 | MIA      | 0.2763 |
| ENSP00000320234 | MFSD7    | 0.2763 |
| ENSP00000298974 | MAGEA9   | 0.2763 |



|                 |                 |        |
|-----------------|-----------------|--------|
| ENSP00000430025 | LYRM2           | 0.2763 |
| ENSP00000450675 | LIMS3           | 0.2763 |
| ENSP00000457330 | LIMS1           | 0.2763 |
| ENSP00000357412 | LENEP           | 0.2763 |
| ENSP00000233714 | LANCL1          | 0.2763 |
| ENSP00000346536 | KRTAP23-1       | 0.2763 |
| ENSP00000307014 | KRT73           | 0.2763 |
| ENSP00000352314 | KLHL14          | 0.2763 |
| ENSP00000356189 | IPCEF1          | 0.2763 |
| ENSP00000239316 | INSL4           | 0.2763 |
| ENSP00000385491 | GTF2IRD2        | 0.2763 |
| ENSP00000275169 | GPR6            | 0.2763 |
| ENSP00000348161 | GPR160          | 0.2763 |
| ENSP00000316861 | GPM6B           | 0.2763 |
| ENSP00000371170 | GAGE13          | 0.2763 |
| ENSP00000364512 | G6PC2           | 0.2763 |
| ENSP00000275461 | FERD3L          | 0.2763 |
| ENSP00000369618 | FASTKD5         | 0.2763 |
| ENSP00000286544 | FAM161B         | 0.2763 |
| ENSP00000398401 | FAM133B         | 0.2763 |
| ENSP00000216214 | FAM118A         | 0.2763 |
| ENSP00000371643 | DEFB135         | 0.2763 |
| ENSP00000412267 | CXXC4           | 0.2763 |
| ENSP00000264376 | CRYGD           | 0.2763 |
| ENSP00000268720 | CPNE7           | 0.2763 |
| ENSP00000267935 | COMMD4          | 0.2763 |
| ENSP00000296658 | CMBL            | 0.2763 |
| ENSP00000229332 | CLEC4A          | 0.2763 |
| ENSP00000356395 | CFHR3           | 0.2763 |
| ENSP00000329942 | CD300E          | 0.2763 |
| ENSP00000309681 | CCDC106         | 0.2763 |
| ENSP00000237822 | C2orf43         | 0.2763 |
| ENSP00000333064 | C22orf39        | 0.2763 |
| ENSP00000256324 | C14orf159       | 0.2763 |
| ENSP00000332413 | BEST3           | 0.2763 |
| ENSP00000387512 | AC139426.2      | 0.2763 |
| ENSP00000387547 | AC016745.1      | 0.2763 |
| ENSP00000408206 | ENSG00000235153 | 0.2763 |
| ENSP00000440053 | NPIP1           | 0.2763 |
| ENSP00000293771 | ZNF653          | 0.2737 |
| ENSP00000344308 | ZNF341          | 0.2737 |
| ENSP00000354501 | ZNF277          | 0.2737 |
| ENSP00000308921 | ZCCHC12         | 0.2737 |
| ENSP00000409107 | ZBTB42          | 0.2737 |
| ENSP00000267522 | WDR89           | 0.2737 |
| ENSP00000256339 | UNC79           | 0.2737 |
| ENSP00000382713 | UBE2QL1         | 0.2737 |
| ENSP00000383911 | UBAC2           | 0.2737 |
| ENSP00000347161 | TSGA10          | 0.2737 |
| ENSP00000278422 | TMX2            | 0.2737 |
| ENSP00000355800 | TMEM63A         | 0.2737 |
| ENSP00000227525 | TMEM109         | 0.2737 |
| ENSP00000264866 | TBC1D19         | 0.2737 |

|                 |            |        |
|-----------------|------------|--------|
| ENSP00000352849 | SIRPB2     | 0.2737 |
| ENSP00000413861 | SIGLEC9    | 0.2737 |
| ENSP00000261593 | RNF138     | 0.2737 |
| ENSP00000295049 | RFTN2      | 0.2737 |
| ENSP00000242249 | RAMP3      | 0.2737 |
| ENSP00000288368 | PREX2      | 0.2737 |
| ENSP00000393832 | PPP1R3G    | 0.2737 |
| ENSP00000456953 | POTEB      | 0.2737 |
| ENSP00000240617 | PLBD1      | 0.2737 |
| ENSP00000458570 | PCDHGA4    | 0.2737 |
| ENSP00000261888 | PARP16     | 0.2737 |
| ENSP00000239690 | NUDCD1     | 0.2737 |
| ENSP00000364782 | NEU1       | 0.2737 |
| ENSP00000315397 | MRPS31     | 0.2737 |
| ENSP00000368315 | MAGEB5     | 0.2737 |
| ENSP00000316891 | LIMCH1     | 0.2737 |
| ENSP00000335006 | LCE3A      | 0.2737 |
| ENSP00000267119 | KRT71      | 0.2737 |
| ENSP00000358955 | KIAA1324   | 0.2737 |
| ENSP00000407353 | IFLTD1     | 0.2737 |
| ENSP00000335447 | HEATR4     | 0.2737 |
| ENSP00000271357 | GPR161     | 0.2737 |
| ENSP00000329266 | GPIHBP1    | 0.2737 |
| ENSP00000356842 | GPA33      | 0.2737 |
| ENSP00000266014 | GLT8D1     | 0.2737 |
| ENSP00000355938 | FLVCR1     | 0.2737 |
| ENSP00000368517 | ECHDC3     | 0.2737 |
| ENSP00000297581 | DCSTAMP    | 0.2737 |
| ENSP00000375220 | CTAGE1     | 0.2737 |
| ENSP00000309524 | CSHL1      | 0.2737 |
| ENSP00000465204 | CNTD1      | 0.2737 |
| ENSP00000268595 | CMTM2      | 0.2737 |
| ENSP00000460682 | CLEC3A     | 0.2737 |
| ENSP00000391402 | CISD3      | 0.2737 |
| ENSP00000328983 | CHST6      | 0.2737 |
| ENSP00000262150 | CDH19      | 0.2737 |
| ENSP00000376397 | CD300LB    | 0.2737 |
| ENSP00000368102 | CCDC3      | 0.2737 |
| ENSP00000431759 | C12ORF55   | 0.2737 |
| ENSP00000329990 | BX072566.1 | 0.2737 |
| ENSP00000341762 | BSPH1      | 0.2737 |
| ENSP00000370047 | BNC2       | 0.2737 |
| ENSP00000361813 | BEX1       | 0.2737 |
| ENSP00000349891 | ANKRD20A4  | 0.2737 |
| ENSP00000335255 | ANGPTL5    | 0.2737 |
| ENSP00000236709 | A4GNT      | 0.2737 |
| ENSP00000306756 | ZNF584     | 0.2711 |
| ENSP00000322545 | ZNF543     | 0.2711 |
| ENSP00000298299 | ZNF22      | 0.2711 |
| ENSP00000278314 | ZNF214     | 0.2711 |
| ENSP00000385939 | ZNF12      | 0.2711 |
| ENSP00000331704 | XKR3       | 0.2711 |
| ENSP00000361726 | WFDC10A    | 0.2711 |

|                 |           |        |
|-----------------|-----------|--------|
| ENSP00000386609 | WDR81     | 0.2711 |
| ENSP00000368612 | VWA8      | 0.2711 |
| ENSP00000350409 | UNC50     | 0.2711 |
| ENSP00000332969 | TRIM64B   | 0.2711 |
| ENSP00000257604 | TRAFD1    | 0.2711 |
| ENSP00000330475 | TMPRSS11B | 0.2711 |
| ENSP00000334849 | TMEM104   | 0.2711 |
| ENSP00000395328 | TMEM100   | 0.2711 |
| ENSP00000330433 | TM2D3     | 0.2711 |
| ENSP00000361522 | TJAP1     | 0.2711 |
| ENSP00000258613 | THSD1     | 0.2711 |
| ENSP00000358142 | SV2A      | 0.2711 |
| ENSP00000265007 | SOX30     | 0.2711 |
| ENSP00000339324 | SMIM15    | 0.2711 |
| ENSP00000376123 | SH2D2A    | 0.2711 |
| ENSP00000312439 | RNF26     | 0.2711 |
| ENSP00000296498 | PRSS12    | 0.2711 |
| ENSP00000378935 | PPHLN1    | 0.2711 |
| ENSP00000351695 | PNLIPRP1  | 0.2711 |
| ENSP00000351379 | PFN3      | 0.2711 |
| ENSP00000429834 | PCDHGA5   | 0.2711 |
| ENSP00000287008 | PCDH1     | 0.2711 |
| ENSP00000405424 | OXR1      | 0.2711 |
| ENSP00000373610 | OTOA      | 0.2711 |
| ENSP00000301532 | OR5I1     | 0.2711 |
| ENSP00000332613 | OAF       | 0.2711 |
| ENSP00000364595 | NINJ1     | 0.2711 |
| ENSP00000473092 | MUC8      | 0.2711 |
| ENSP00000264819 | MIER2     | 0.2711 |
| ENSP00000382867 | MAGEB16   | 0.2711 |
| ENSP00000296252 | LIPH      | 0.2711 |
| ENSP00000250366 | KLK9      | 0.2711 |
| ENSP00000355211 | KIAA1704  | 0.2711 |
| ENSP00000347188 | KCTD6     | 0.2711 |
| ENSP00000287996 | IPPK      | 0.2711 |
| ENSP00000263326 | IL37      | 0.2711 |
| ENSP00000386207 | HMSD      | 0.2711 |
| ENSP00000310255 | GPR152    | 0.2711 |
| ENSP00000458791 | GPR139    | 0.2711 |
| ENSP00000359634 | GOLGA7B   | 0.2711 |
| ENSP00000300515 | GOLGA6L9  | 0.2711 |
| ENSP00000290438 | GOLGA6A   | 0.2711 |
| ENSP00000315263 | GLTP      | 0.2711 |
| ENSP00000240986 | GJA8      | 0.2711 |
| ENSP00000423313 | GALNTL6   | 0.2711 |
| ENSP00000394249 | FLCN      | 0.2711 |
| ENSP00000221665 | FIZ1      | 0.2711 |
| ENSP00000416558 | FBXO24    | 0.2711 |
| ENSP00000238823 | FAM98A    | 0.2711 |
| ENSP00000393987 | FAM19A2   | 0.2711 |
| ENSP00000355045 | FAM179B   | 0.2711 |
| ENSP00000354270 | FAM107A   | 0.2711 |
| ENSP00000352273 | DIO3      | 0.2711 |

|                 |            |        |
|-----------------|------------|--------|
| ENSP00000335307 | DEFB106A   | 0.2711 |
| ENSP00000334330 | DEFB105A   | 0.2711 |
| ENSP00000390590 | DDN        | 0.2711 |
| ENSP00000265922 | DBC1       | 0.2711 |
| ENSP00000371294 | CTNS       | 0.2711 |
| ENSP00000328521 | CRIP2      | 0.2711 |
| ENSP00000419475 | COMMD2     | 0.2711 |
| ENSP00000364934 | CLIC1      | 0.2711 |
| ENSP00000449999 | CLEC5A     | 0.2711 |
| ENSP00000367476 | CEP104     | 0.2711 |
| ENSP00000289429 | CD1A       | 0.2711 |
| ENSP00000365477 | CCDC93     | 0.2711 |
| ENSP00000254691 | CARD6      | 0.2711 |
| ENSP00000369755 | C2CD4B     | 0.2711 |
| ENSP00000290155 | C21orf59   | 0.2711 |
| ENSP00000397394 | C19orf25   | 0.2711 |
| ENSP00000307264 | C11orf24   | 0.2711 |
| ENSP00000362637 | BLCAP      | 0.2711 |
| ENSP00000246174 | ARMCX5     | 0.2711 |
| ENSP00000253401 | ARHGEF9    | 0.2711 |
| ENSP00000427130 | ANKRD13D   | 0.2711 |
| ENSP00000370088 | AMELX      | 0.2711 |
| ENSP00000351384 | ANKRD36BP1 | 0.2711 |
| ENSP00000367228 | CMAHP      | 0.2711 |
| ENSP00000269973 | ZNF45      | 0.2684 |
| ENSP00000230122 | ZBTB24     | 0.2684 |
| ENSP00000410083 | VEZT       | 0.2684 |
| ENSP00000373413 | UFSP1      | 0.2684 |
| ENSP00000360821 | UBAC1      | 0.2684 |
| ENSP00000346791 | TTC3       | 0.2684 |
| ENSP00000372394 | TMEM129    | 0.2684 |
| ENSP00000306887 | TMEM126A   | 0.2684 |
| ENSP00000385276 | TENM3      | 0.2684 |
| ENSP00000364621 | SUSD3      | 0.2684 |
| ENSP00000295641 | STK11IP    | 0.2684 |
| ENSP00000312402 | SLFN11     | 0.2684 |
| ENSP00000289575 | SLCO2B1    | 0.2684 |
| ENSP00000371872 | SLC35G5    | 0.2684 |
| ENSP00000385028 | SLC22A23   | 0.2684 |
| ENSP00000310241 | SLC22A13   | 0.2684 |
| ENSP00000255226 | SLC14A2    | 0.2684 |
| ENSP00000289707 | SLAMF8     | 0.2684 |
| ENSP00000410862 | RUNDC3A    | 0.2684 |
| ENSP00000344193 | RNASE1     | 0.2684 |
| ENSP00000308948 | PTCD2      | 0.2684 |
| ENSP00000371272 | PLIN5      | 0.2684 |
| ENSP00000333751 | PLCXD3     | 0.2684 |
| ENSP00000327763 | NLRP10     | 0.2684 |
| ENSP00000369473 | N4BP2L1    | 0.2684 |
| ENSP00000254770 | LANCL2     | 0.2684 |
| ENSP00000366970 | GPR20      | 0.2684 |
| ENSP00000264080 | GPR108     | 0.2684 |
| ENSP00000467556 | GPATCH8    | 0.2684 |

|                 |               |        |
|-----------------|---------------|--------|
| ENSP00000420405 | FSBP          | 0.2684 |
| ENSP00000282226 | FAM151B       | 0.2684 |
| ENSP00000331915 | FAM101B       | 0.2684 |
| ENSP00000321029 | EXD1          | 0.2684 |
| ENSP00000264956 | EVC           | 0.2684 |
| ENSP00000337675 | EBAG9         | 0.2684 |
| ENSP00000340017 | DOC2A         | 0.2684 |
| ENSP00000216241 | CHADL         | 0.2684 |
| ENSP00000327075 | CD300LF       | 0.2684 |
| ENSP00000225726 | CCDC47        | 0.2684 |
| ENSP00000355623 | C1orf198      | 0.2684 |
| ENSP00000254336 | C19orf57      | 0.2684 |
| ENSP00000317579 | C16orf58      | 0.2684 |
| ENSP00000358293 | C10orf118     | 0.2684 |
| ENSP00000327459 | APOBEC3B      | 0.2684 |
| ENSP00000327608 | ADAMTSL5      | 0.2684 |
| ENSP00000274181 | ADAMTS16      | 0.2684 |
| ENSP00000470123 | ZSCAN18       | 0.2658 |
| ENSP00000305373 | ZNF440        | 0.2658 |
| ENSP00000270708 | WRAP73        | 0.2658 |
| ENSP00000360065 | WDR78         | 0.2658 |
| ENSP00000464258 | VHLL          | 0.2658 |
| ENSP00000355299 | TSEN15        | 0.2658 |
| ENSP00000361982 | TRUB2         | 0.2658 |
| ENSP00000297459 | TMEM74        | 0.2658 |
| ENSP00000362021 | TMEM35        | 0.2658 |
| ENSP00000296978 | TMEM200A      | 0.2658 |
| ENSP00000301204 | TMEM145       | 0.2658 |
| ENSP00000351380 | TMA16         | 0.2658 |
| ENSP00000248701 | SPINK2        | 0.2658 |
| ENSP00000305343 | SOX14         | 0.2658 |
| ENSP00000278222 | SAA4          | 0.2658 |
| ENSP00000374552 | RNF216        | 0.2658 |
| ENSP00000301258 | PSCA          | 0.2658 |
| ENSP00000215912 | PIK3IP1       | 0.2658 |
| ENSP00000375907 | PID1          | 0.2658 |
| ENSP00000008938 | PGLYRP1       | 0.2658 |
| ENSP00000410858 | NHLRC4        | 0.2658 |
| ENSP00000377823 | NDRG4         | 0.2658 |
| ENSP00000262244 | MOB3B         | 0.2658 |
| ENSP00000263092 | METTL16       | 0.2658 |
| ENSP00000306760 | LRRC45        | 0.2658 |
| ENSP00000321546 | LOH12CR1      | 0.2658 |
| ENSP00000317141 | KCTD12        | 0.2658 |
| ENSP00000328352 | KCTD11        | 0.2658 |
| ENSP00000356549 | IER5          | 0.2658 |
| ENSP00000367378 | GPR34         | 0.2658 |
| ENSP00000300079 | GLYATL1       | 0.2658 |
| ENSP00000338523 | FNDC3B        | 0.2658 |
| ENSP00000339067 | FGFBP3        | 0.2658 |
| ENSP00000339250 | DPPA3         | 0.2658 |
| ENSP00000359170 | DPCD          | 0.2658 |
| ENSP00000469533 | CTC-490E21.12 | 0.2658 |

|                 |               |        |
|-----------------|---------------|--------|
| ENSP00000360360 | CT47B1        | 0.2658 |
| ENSP00000307540 | CST2          | 0.2658 |
| ENSP00000347919 | COA4          | 0.2658 |
| ENSP00000368814 | CMTM1         | 0.2658 |
| ENSP00000347916 | CLEC12A       | 0.2658 |
| ENSP00000357474 | CEP85L        | 0.2658 |
| ENSP00000389427 | CEP44         | 0.2658 |
| ENSP00000249064 | CCDC117       | 0.2658 |
| ENSP00000345659 | CA7           | 0.2658 |
| ENSP00000257267 | C5AR2         | 0.2658 |
| ENSP00000280758 | BTBD11        | 0.2658 |
| ENSP00000344285 | BSX           | 0.2658 |
| ENSP00000358062 | AIM1          | 0.2658 |
| ENSP00000221204 | FGL1          | 0.2658 |
| ENSP00000319222 | ZNF720        | 0.2632 |
| ENSP00000334853 | ZNF555        | 0.2632 |
| ENSP00000361761 | WFDC2         | 0.2632 |
| ENSP00000263461 | WDR11         | 0.2632 |
| ENSP00000359668 | VGLL1         | 0.2632 |
| ENSP00000358888 | SYPL2         | 0.2632 |
| ENSP00000260637 | SULT6B1       | 0.2632 |
| ENSP00000275764 | STRA8         | 0.2632 |
| ENSP00000366144 | SOX21         | 0.2632 |
| ENSP00000352927 | SOGA2         | 0.2632 |
| ENSP00000436897 | SMIM3         | 0.2632 |
| ENSP00000385814 | RPAIN         | 0.2632 |
| ENSP00000468267 | RP11-146D12.2 | 0.2632 |
| ENSP00000326095 | RNF166        | 0.2632 |
| ENSP00000407925 | RIMBP3B       | 0.2632 |
| ENSP00000333003 | PRSS55        | 0.2632 |
| ENSP00000314396 | PRMT10        | 0.2632 |
| ENSP00000351856 | POTEC         | 0.2632 |
| ENSP00000219207 | PLLP          | 0.2632 |
| ENSP00000440896 | PLD5          | 0.2632 |
| ENSP00000433378 | PCDHA6        | 0.2632 |
| ENSP00000363400 | PAFAH2        | 0.2632 |
| ENSP00000325381 | OR8D4         | 0.2632 |
| ENSP00000310488 | OR7D4         | 0.2632 |
| ENSP00000441354 | OR4D2         | 0.2632 |
| ENSP00000306651 | OR4C11        | 0.2632 |
| ENSP00000389625 | OR2M3         | 0.2632 |
| ENSP00000319817 | OPA3          | 0.2632 |
| ENSP00000215061 | OCEL1         | 0.2632 |
| ENSP00000414055 | NRBP2         | 0.2632 |
| ENSP00000359128 | NPM3          | 0.2632 |
| ENSP00000322956 | MFAP3         | 0.2632 |
| ENSP00000377796 | METTL7B       | 0.2632 |
| ENSP00000362457 | MAGEE2        | 0.2632 |
| ENSP00000336661 | LRRC71        | 0.2632 |
| ENSP00000357769 | LCE2B         | 0.2632 |
| ENSP00000334869 | LCE1A         | 0.2632 |
| ENSP00000303549 | GPR82         | 0.2632 |
| ENSP00000359686 | GPR112        | 0.2632 |

|                 |                |        |
|-----------------|----------------|--------|
| ENSP00000361483 | GPR107         | 0.2632 |
| ENSP00000264428 | GLRB           | 0.2632 |
| ENSP00000355996 | GOS2           | 0.2632 |
| ENSP00000332886 | FREM3          | 0.2632 |
| ENSP00000277632 | FAM188A        | 0.2632 |
| ENSP00000359292 | FAM178A        | 0.2632 |
| ENSP00000246100 | FAM110A        | 0.2632 |
| ENSP00000284274 | FAM105B        | 0.2632 |
| ENSP00000334037 | EMC10          | 0.2632 |
| ENSP00000384081 | EFR3B          | 0.2632 |
| ENSP00000242827 | EBPL           | 0.2632 |
| ENSP00000335306 | DPPA4          | 0.2632 |
| ENSP00000365486 | DEFB123        | 0.2632 |
| ENSP00000472710 | CTD-2192J16.24 | 0.2632 |
| ENSP00000366032 | COMMD3         | 0.2632 |
| ENSP00000339168 | COLEC11        | 0.2632 |
| ENSP00000264001 | CKLF           | 0.2632 |
| ENSP00000341206 | CHST4          | 0.2632 |
| ENSP00000264249 | CHST10         | 0.2632 |
| ENSP00000291458 | CCDC58         | 0.2632 |
| ENSP00000261058 | CCDC54         | 0.2632 |
| ENSP00000373566 | CCDC158        | 0.2632 |
| ENSP00000387252 | CCDC103        | 0.2632 |
| ENSP00000356263 | C6orf211       | 0.2632 |
| ENSP00000238044 | C2orf40        | 0.2632 |
| ENSP00000343742 | BROX           | 0.2632 |
| ENSP00000354675 | BHLHB9         | 0.2632 |
| ENSP00000266736 | AMDHD1         | 0.2632 |
| ENSP00000339161 | AIDA           | 0.2632 |
| ENSP00000402343 | ZNF469         | 0.2605 |
| ENSP00000350869 | ZNF346         | 0.2605 |
| ENSP00000327604 | TRIM49         | 0.2605 |
| ENSP00000362381 | TOR2A          | 0.2605 |
| ENSP00000324775 | TMIE           | 0.2605 |
| ENSP00000312679 | TESPA1         | 0.2605 |
| ENSP00000343223 | TCL1B          | 0.2605 |
| ENSP00000455908 | SOGA3          | 0.2605 |
| ENSP00000236877 | SLC8A2         | 0.2605 |
| ENSP00000357915 | SLC22A16       | 0.2605 |
| ENSP00000390637 | SLC14A1        | 0.2605 |
| ENSP00000245908 | SH2D3A         | 0.2605 |
| ENSP00000342313 | SAMD11         | 0.2605 |
| ENSP00000454437 | RP4-576H24.4   | 0.2605 |
| ENSP00000417176 | RNF183         | 0.2605 |
| ENSP00000397415 | RLN3           | 0.2605 |
| ENSP00000198536 | PILRA          | 0.2605 |
| ENSP00000268896 | PCTP           | 0.2605 |
| ENSP00000381611 | PCDHGA10       | 0.2605 |
| ENSP00000431748 | PCDHA2         | 0.2605 |
| ENSP00000304235 | OR1L6          | 0.2605 |
| ENSP00000363522 | OR13A1         | 0.2605 |
| ENSP00000321929 | NME9           | 0.2605 |
| ENSP00000363899 | NIPSNAP3A      | 0.2605 |

|                 |                 |        |
|-----------------|-----------------|--------|
| ENSP00000334197 | KRTAP10-11      | 0.2605 |
| ENSP00000377616 | KRT222          | 0.2605 |
| ENSP00000350570 | IFT20           | 0.2605 |
| ENSP00000398971 | IFRD2           | 0.2605 |
| ENSP00000382670 | GRXCR1          | 0.2605 |
| ENSP00000228887 | GPRC5D          | 0.2605 |
| ENSP00000229955 | GPR63           | 0.2605 |
| ENSP00000303149 | GPR27           | 0.2605 |
| ENSP00000362550 | FTSJD2          | 0.2605 |
| ENSP00000238256 | FKBP15          | 0.2605 |
| ENSP00000252530 | FAM98C          | 0.2605 |
| ENSP00000354688 | FAM45A          | 0.2605 |
| ENSP00000309786 | FAM21D          | 0.2605 |
| ENSP00000375267 | FAM127B         | 0.2605 |
| ENSP00000268793 | DPEP3           | 0.2605 |
| ENSP00000306407 | DBNDD1          | 0.2605 |
| ENSP00000232508 | CYB561D2        | 0.2605 |
| ENSP00000302543 | CXXC5           | 0.2605 |
| ENSP00000355470 | CNST            | 0.2605 |
| ENSP00000348757 | CCDC151         | 0.2605 |
| ENSP00000328495 | C21orf128       | 0.2605 |
| ENSP00000454565 | C17orf103       | 0.2605 |
| ENSP00000318852 | BPNT1           | 0.2605 |
| ENSP00000376148 | ARMC6           | 0.2605 |
| ENSP00000298032 | ARMC3           | 0.2605 |
| ENSP00000399547 | ANKRD63         | 0.2605 |
| ENSP00000459356 | ENSG00000262314 | 0.2605 |
| ENSP00000347338 | ZNF607          | 0.2579 |
| ENSP00000377461 | ZNF559          | 0.2579 |
| ENSP00000354663 | ZNF438          | 0.2579 |
| ENSP00000299687 | ZNF407          | 0.2579 |
| ENSP00000354206 | ZNF219          | 0.2579 |
| ENSP00000335437 | ZNF20           | 0.2579 |
| ENSP00000431265 | ZFP82           | 0.2579 |
| ENSP00000361740 | WBP5            | 0.2579 |
| ENSP00000387100 | TPRN            | 0.2579 |
| ENSP00000303992 | TMEM43          | 0.2579 |
| ENSP00000297477 | TMEM184A        | 0.2579 |
| ENSP00000206380 | TMEM101         | 0.2579 |
| ENSP00000276480 | ST18            | 0.2579 |
| ENSP00000357251 | SOGA3           | 0.2579 |
| ENSP00000309741 | SLCO4C1         | 0.2579 |
| ENSP00000420939 | SEPP1           | 0.2579 |
| ENSP00000220478 | SCG3            | 0.2579 |
| ENSP00000453436 | RP11-467N20.5   | 0.2579 |
| ENSP00000296292 | RFT1            | 0.2579 |
| ENSP00000358919 | PSRC1           | 0.2579 |
| ENSP00000405718 | PNMA6A          | 0.2579 |
| ENSP00000357986 | PLEKHA1         | 0.2579 |
| ENSP00000371073 | PLCXD1          | 0.2579 |
| ENSP00000381589 | PCDHGA11        | 0.2579 |
| ENSP00000353343 | OR52M1          | 0.2579 |
| ENSP00000391397 | MT1G            | 0.2579 |



|                 |                 |        |
|-----------------|-----------------|--------|
| ENSP00000307093 | MAP6            | 0.2579 |
| ENSP00000300591 | LOXHD1          | 0.2579 |
| ENSP00000381298 | LONRF1          | 0.2579 |
| ENSP00000353893 | LGALS14         | 0.2579 |
| ENSP00000316737 | LCE1D           | 0.2579 |
| ENSP00000334287 | KRTAP21-2       | 0.2579 |
| ENSP00000368872 | INSC            | 0.2579 |
| ENSP00000385422 | GPR61           | 0.2579 |
| ENSP00000327417 | GPR39           | 0.2579 |
| ENSP00000367125 | GPR153          | 0.2579 |
| ENSP00000365550 | GKAP1           | 0.2579 |
| ENSP00000368547 | FEZ2            | 0.2579 |
| ENSP00000258200 | FBXL8           | 0.2579 |
| ENSP00000318974 | FAM133A         | 0.2579 |
| ENSP00000419235 | FAM115A         | 0.2579 |
| ENSP00000261486 | EPB41L4A        | 0.2579 |
| ENSP00000274458 | COMMD10         | 0.2579 |
| ENSP00000262622 | CHST8           | 0.2579 |
| ENSP00000309649 | CA5A            | 0.2579 |
| ENSP00000322108 | C9orf84         | 0.2579 |
| ENSP00000331167 | C11orf35        | 0.2579 |
| ENSP00000397759 | BSDC1           | 0.2579 |
| ENSP00000332788 | ANO9            | 0.2579 |
| ENSP00000326572 | ANKRD62         | 0.2579 |
| ENSP00000313809 | AMBN            | 0.2579 |
| ENSP00000300176 | AGFG2           | 0.2579 |
| ENSP00000423134 | ENSG00000250765 | 0.2579 |
| ENSP00000332325 | ZNF703          | 0.2553 |
| ENSP00000296600 | ZNF474          | 0.2553 |
| ENSP00000354964 | ZNF318          | 0.2553 |
| ENSP00000253159 | ZNF236          | 0.2553 |
| ENSP00000380087 | ZNF213          | 0.2553 |
| ENSP00000345392 | ZNF2            | 0.2553 |
| ENSP00000262259 | ZNF175          | 0.2553 |
| ENSP00000254166 | ZNF132          | 0.2553 |
| ENSP00000278590 | ZC3H12C         | 0.2553 |
| ENSP00000346603 | ZBTB45          | 0.2553 |
| ENSP00000365899 | VSX1            | 0.2553 |
| ENSP00000322339 | VN1R1           | 0.2553 |
| ENSP00000257632 | UPK3B           | 0.2553 |
| ENSP00000281441 | TMEM45B         | 0.2553 |
| ENSP00000358559 | SYT6            | 0.2553 |
| ENSP00000366827 | ST8SIA6         | 0.2553 |
| ENSP00000301717 | SPSB3           | 0.2553 |
| ENSP00000338034 | SPRYD4          | 0.2553 |
| ENSP00000364054 | SPIN3           | 0.2553 |
| ENSP00000375909 | SPHKAP          | 0.2553 |
| ENSP00000380354 | SPATA22         | 0.2553 |
| ENSP00000302400 | SMR3B           | 0.2553 |
| ENSP00000390750 | SMIM19          | 0.2553 |
| ENSP00000298966 | SMCO4           | 0.2553 |
| ENSP00000301335 | SLC43A2         | 0.2553 |
| ENSP00000428331 | SFTA3           | 0.2553 |

|                 |               |        |
|-----------------|---------------|--------|
| ENSP00000285947 | SETD9         | 0.2553 |
| ENSP00000384182 | SCFD2         | 0.2553 |
| ENSP00000431198 | RP11-585F1.10 | 0.2553 |
| ENSP00000295755 | RETNLB        | 0.2553 |
| ENSP00000401328 | PRSS48        | 0.2553 |
| ENSP00000256103 | PMP2          | 0.2553 |
| ENSP00000385892 | PLEKHB2       | 0.2553 |
| ENSP00000366876 | PHF13         | 0.2553 |
| ENSP00000381605 | PCDHGA8       | 0.2553 |
| ENSP00000304419 | OR2B2         | 0.2553 |
| ENSP00000254627 | OC90          | 0.2553 |
| ENSP00000329295 | NXPH3         | 0.2553 |
| ENSP00000323184 | MYCBPAP       | 0.2553 |
| ENSP00000263268 | MREG          | 0.2553 |
| ENSP00000442688 | MFSD5         | 0.2553 |
| ENSP00000371345 | METTL22       | 0.2553 |
| ENSP00000315731 | METRNL        | 0.2553 |
| ENSP00000267102 | LMBR1L        | 0.2553 |
| ENSP00000463483 | KRT222        | 0.2553 |
| ENSP00000156499 | KLK14         | 0.2553 |
| ENSP00000344424 | KIAA0247      | 0.2553 |
| ENSP00000368402 | KCTD4         | 0.2553 |
| ENSP00000279392 | HIRIP3        | 0.2553 |
| ENSP00000344125 | GTDC2         | 0.2553 |
| ENSP00000328672 | GPRIN3        | 0.2553 |
| ENSP00000369344 | GPR150        | 0.2553 |
| ENSP00000455298 | GOLGA8S       | 0.2553 |
| ENSP00000399637 | GOLGA8I       | 0.2553 |
| ENSP00000376548 | GALNTL5       | 0.2553 |
| ENSP00000227756 | GALNT18       | 0.2553 |
| ENSP00000306888 | FAM151A       | 0.2553 |
| ENSP00000359820 | FAM122C       | 0.2553 |
| ENSP00000354461 | FAM109A       | 0.2553 |
| ENSP00000296420 | EMCN          | 0.2553 |
| ENSP00000342012 | DMKN          | 0.2553 |
| ENSP00000262585 | DENND3        | 0.2553 |
| ENSP00000276127 | CPXCR1        | 0.2553 |
| ENSP00000251166 | CORO7         | 0.2553 |
| ENSP00000387209 | CEP19         | 0.2553 |
| ENSP00000376250 | CCDC50        | 0.2553 |
| ENSP00000330240 | CCDC34        | 0.2553 |
| ENSP00000395706 | CCDC14        | 0.2553 |
| ENSP00000379310 | CASC1         | 0.2553 |
| ENSP00000357106 | CADM3         | 0.2553 |
| ENSP00000349358 | C12orf29      | 0.2553 |
| ENSP00000367878 | C11orf49      | 0.2553 |
| ENSP00000367104 | BFSP1         | 0.2553 |
| ENSP00000396976 | BAHD1         | 0.2553 |
| ENSP00000348635 | AMICA1        | 0.2553 |
| ENSP00000391200 | ZNF692        | 0.2526 |
| ENSP00000320188 | ZNF579        | 0.2526 |
| ENSP00000347045 | ZNF43         | 0.2526 |
| ENSP00000268655 | ZNF174        | 0.2526 |

|                 |               |        |
|-----------------|---------------|--------|
| ENSP00000371715 | ZG16B         | 0.2526 |
| ENSP00000274030 | USP53         | 0.2526 |
| ENSP00000350716 | TUSC1         | 0.2526 |
| ENSP00000310829 | TTC18         | 0.2526 |
| ENSP00000039989 | TTC17         | 0.2526 |
| ENSP00000334708 | TMEM150A      | 0.2526 |
| ENSP00000418803 | TIMMDC1       | 0.2526 |
| ENSP00000240615 | TAS2R8        | 0.2526 |
| ENSP00000456609 | STRA6         | 0.2526 |
| ENSP00000265404 | STAP1         | 0.2526 |
| ENSP00000414302 | SRSF12        | 0.2526 |
| ENSP00000328149 | SPATA8        | 0.2526 |
| ENSP00000422185 | SORCS2        | 0.2526 |
| ENSP00000370669 | SLC8A3        | 0.2526 |
| ENSP00000424424 | SLC4A9        | 0.2526 |
| ENSP00000352497 | SLC25A44      | 0.2526 |
| ENSP00000263512 | SLC10A3       | 0.2526 |
| ENSP00000264313 | SLAIN2        | 0.2526 |
| ENSP00000345243 | SIGLEC10      | 0.2526 |
| ENSP00000442339 | SAP25         | 0.2526 |
| ENSP00000447650 | RP11-644F5.10 | 0.2526 |
| ENSP00000368144 | PRR5L         | 0.2526 |
| ENSP00000318270 | PROM2         | 0.2526 |
| ENSP00000368720 | PLEKHN1       | 0.2526 |
| ENSP00000295645 | PDCL2         | 0.2526 |
| ENSP00000306095 | OR10H2        | 0.2526 |
| ENSP00000273347 | NXPE3         | 0.2526 |
| ENSP00000450924 | NKX1-2        | 0.2526 |
| ENSP00000361596 | NEURL2        | 0.2526 |
| ENSP00000315878 | MS4A6A        | 0.2526 |
| ENSP00000366095 | MOG           | 0.2526 |
| ENSP00000333539 | MIPOL1        | 0.2526 |
| ENSP00000333183 | MBD3L3        | 0.2526 |
| ENSP00000209718 | KRT23         | 0.2526 |
| ENSP00000339340 | KCTD21        | 0.2526 |
| ENSP00000262487 | ISM1          | 0.2526 |
| ENSP00000242607 | HVCN1         | 0.2526 |
| ENSP00000398064 | HIGD1A        | 0.2526 |
| ENSP00000182377 | FAR2          | 0.2526 |
| ENSP00000288228 | FAM81A        | 0.2526 |
| ENSP00000365080 | FAM155A       | 0.2526 |
| ENSP00000282041 | EPG5          | 0.2526 |
| ENSP00000256545 | EMC7          | 0.2526 |
| ENSP00000315098 | EDDM3A        | 0.2526 |
| ENSP00000288710 | DRC1          | 0.2526 |
| ENSP00000417710 | DPPA2         | 0.2526 |
| ENSP00000359788 | DDX26B        | 0.2526 |
| ENSP00000311313 | CST6          | 0.2526 |
| ENSP00000296953 | CREBRF        | 0.2526 |
| ENSP00000223336 | COA1          | 0.2526 |
| ENSP00000328487 | CCDC87        | 0.2526 |
| ENSP00000344655 | CCDC41        | 0.2526 |
| ENSP00000368503 | C4orf46       | 0.2526 |

|                 |               |        |
|-----------------|---------------|--------|
| ENSP00000356886 | C1orf110      | 0.2526 |
| ENSP00000005260 | BAIAP2L1      | 0.2526 |
| ENSP00000313422 | ARL6IP4       | 0.2526 |
| ENSP00000314103 | ANKRD34A      | 0.2526 |
| ENSP00000299164 | ADAMTS15      | 0.2526 |
| ENSP00000349161 | ZNF790        | 0.2500 |
| ENSP00000409463 | ZNF740        | 0.2500 |
| ENSP00000349098 | ZNF74         | 0.2500 |
| ENSP00000347730 | ZNF536        | 0.2500 |
| ENSP00000406201 | ZNF160        | 0.2500 |
| ENSP00000392095 | ZNF146        | 0.2500 |
| ENSP00000286760 | WHAMM         | 0.2500 |
| ENSP00000429216 | TRNP1         | 0.2500 |
| ENSP00000291416 | TRIM62        | 0.2500 |
| ENSP00000338989 | TRIM16        | 0.2500 |
| ENSP00000347748 | TPRA1         | 0.2500 |
| ENSP00000334611 | TMPRSS11A     | 0.2500 |
| ENSP00000338607 | THEM6         | 0.2500 |
| ENSP00000369500 | SYAP1         | 0.2500 |
| ENSP00000382231 | SMIM11        | 0.2500 |
| ENSP00000296327 | SLC51A        | 0.2500 |
| ENSP00000353677 | SLC17A2       | 0.2500 |
| ENSP00000405676 | RP11-565P22.6 | 0.2500 |
| ENSP00000419057 | RP11-159G9.5  | 0.2500 |
| ENSP00000334958 | RLTPR         | 0.2500 |
| ENSP00000354963 | RASGEF1C      | 0.2500 |
| ENSP00000325589 | PTPRCAP       | 0.2500 |
| ENSP00000374013 | PRB2          | 0.2500 |
| ENSP00000292330 | PPP1R35       | 0.2500 |
| ENSP00000340125 | PPP1R17       | 0.2500 |
| ENSP00000352458 | PLGLB2        | 0.2500 |
| ENSP00000329403 | PCP4          | 0.2500 |
| ENSP00000429018 | PCDHGB2       | 0.2500 |
| ENSP00000252085 | PCDHGA12      | 0.2500 |
| ENSP00000349719 | OR2L8         | 0.2500 |
| ENSP00000331545 | OR1G1         | 0.2500 |
| ENSP00000424126 | MCTP1         | 0.2500 |
| ENSP00000331435 | MBD3L5        | 0.2500 |
| ENSP00000370801 | MBD3L4        | 0.2500 |
| ENSP00000303758 | LUZP1         | 0.2500 |
| ENSP00000343331 | LIPI          | 0.2500 |
| ENSP00000318607 | LDLRAD3       | 0.2500 |
| ENSP00000296564 | KIAA0947      | 0.2500 |
| ENSP00000321544 | KBTBD11       | 0.2500 |
| ENSP00000366234 | IL31          | 0.2500 |
| ENSP00000341267 | HMGN3         | 0.2500 |
| ENSP00000299192 | HEATR3        | 0.2500 |
| ENSP00000363433 | GPRIN2        | 0.2500 |
| ENSP00000363136 | GPR3          | 0.2500 |
| ENSP00000355551 | GPR137B       | 0.2500 |
| ENSP00000370844 | GPR12         | 0.2500 |
| ENSP00000446479 | FICD          | 0.2500 |
| ENSP00000431459 | FAM89B        | 0.2500 |

|                 |           |        |
|-----------------|-----------|--------|
| ENSP00000352955 | FAM3A     | 0.2500 |
| ENSP00000419088 | FAM162A   | 0.2500 |
| ENSP00000280057 | FAM124A   | 0.2500 |
| ENSP00000331734 | DSCR6     | 0.2500 |
| ENSP00000257215 | DAGLA     | 0.2500 |
| ENSP00000301391 | CYB5D2    | 0.2500 |
| ENSP00000227348 | CRTAM     | 0.2500 |
| ENSP00000223208 | CEP41     | 0.2500 |
| ENSP00000338258 | CDC42EP4  | 0.2500 |
| ENSP00000221922 | CCDC9     | 0.2500 |
| ENSP00000298050 | CCDC67    | 0.2500 |
| ENSP00000285273 | CA10      | 0.2500 |
| ENSP00000318119 | C9orf139  | 0.2500 |
| ENSP00000347301 | BEGAIN    | 0.2500 |
| ENSP00000384894 | AQP12B    | 0.2500 |
| ENSP00000409937 | ALS2CR11  | 0.2500 |
| ENSP00000368761 | ZNF827    | 0.2474 |
| ENSP00000352836 | ZNF675    | 0.2474 |
| ENSP00000366853 | ZNF658    | 0.2474 |
| ENSP00000363747 | ZNF33A    | 0.2474 |
| ENSP00000255198 | ZBED3     | 0.2474 |
| ENSP00000289953 | WFDC8     | 0.2474 |
| ENSP00000383599 | WDR47     | 0.2474 |
| ENSP00000355932 | VASH2     | 0.2474 |
| ENSP00000311219 | TRIM59    | 0.2474 |
| ENSP00000301924 | TRIM35    | 0.2474 |
| ENSP00000305664 | TRABD     | 0.2474 |
| ENSP00000348639 | TMPRSS11F | 0.2474 |
| ENSP00000258439 | TMEM127   | 0.2474 |
| ENSP00000355323 | TEX28     | 0.2474 |
| ENSP00000385347 | TAPT1     | 0.2474 |
| ENSP00000289805 | SPATA2L   | 0.2474 |
| ENSP00000312774 | SPACA4    | 0.2474 |
| ENSP00000269053 | SPACA3    | 0.2474 |
| ENSP00000333519 | SLC24A3   | 0.2474 |
| ENSP00000266560 | RBP5      | 0.2474 |
| ENSP00000384160 | RBM33     | 0.2474 |
| ENSP00000405932 | PROX2     | 0.2474 |
| ENSP00000329880 | PHACTR1   | 0.2474 |
| ENSP00000274569 | PCYOX1L   | 0.2474 |
| ENSP00000461862 | PCDHGB3   | 0.2474 |
| ENSP00000430024 | PCDHGA7   | 0.2474 |
| ENSP00000307726 | OR2C1     | 0.2474 |
| ENSP00000371786 | ONECUT3   | 0.2474 |
| ENSP00000384551 | NXPH1     | 0.2474 |
| ENSP00000311687 | NIPAL4    | 0.2474 |
| ENSP00000308330 | MYEOV     | 0.2474 |
| ENSP00000307706 | MT1E      | 0.2474 |
| ENSP00000256441 | MRPS36    | 0.2474 |
| ENSP00000312834 | MLXIP     | 0.2474 |
| ENSP00000258436 | MFSD9     | 0.2474 |
| ENSP00000329918 | MEX3B     | 0.2474 |
| ENSP00000359339 | MB21D1    | 0.2474 |

|                 |           |        |
|-----------------|-----------|--------|
| ENSP00000243314 | MAGEA9B   | 0.2474 |
| ENSP00000419901 | LITD1     | 0.2474 |
| ENSP00000365756 | KIAA2013  | 0.2474 |
| ENSP00000279024 | KIAA1755  | 0.2474 |
| ENSP00000413445 | KIAA1324L | 0.2474 |
| ENSP00000435150 | KIAA0408  | 0.2474 |
| ENSP00000262580 | GSDMD     | 0.2474 |
| ENSP00000290795 | GPBP1L1   | 0.2474 |
| ENSP00000255945 | GIMAP4    | 0.2474 |
| ENSP00000363709 | FRRS1L    | 0.2474 |
| ENSP00000298223 | FOLR2     | 0.2474 |
| ENSP00000344855 | FBXL14    | 0.2474 |
| ENSP00000335082 | FAM91A1   | 0.2474 |
| ENSP00000328426 | FAM208B   | 0.2474 |
| ENSP00000329040 | FAM174B   | 0.2474 |
| ENSP00000422338 | FAM173B   | 0.2474 |
| ENSP00000340427 | ERMP1     | 0.2474 |
| ENSP00000295571 | EOGT      | 0.2474 |
| ENSP00000339587 | DFNA5     | 0.2474 |
| ENSP00000345374 | CXXC11    | 0.2474 |
| ENSP00000274368 | CRHBP     | 0.2474 |
| ENSP00000262428 | COTL1     | 0.2474 |
| ENSP00000348074 | CLEC9A    | 0.2474 |
| ENSP00000361929 | CERCAM    | 0.2474 |
| ENSP00000262717 | CDH20     | 0.2474 |
| ENSP00000314099 | CA5B      | 0.2474 |
| ENSP00000340220 | C7orf26   | 0.2474 |
| ENSP00000255174 | C20orf111 | 0.2474 |
| ENSP00000215376 | C19orf26  | 0.2474 |
| ENSP00000317671 | C12orf40  | 0.2474 |
| ENSP00000359674 | C10orf62  | 0.2474 |
| ENSP00000319281 | BASP1     | 0.2474 |
| ENSP00000250693 | ART1      | 0.2474 |
| ENSP00000324277 | APOLD1    | 0.2474 |
| ENSP00000315371 | ANO5      | 0.2474 |
| ENSP00000284268 | ANKH      | 0.2474 |
| ENSP00000366015 | ANGPTL7   | 0.2474 |
| ENSP00000255152 | ZSWIM3    | 0.2447 |
| ENSP00000321963 | ZSCAN4    | 0.2447 |
| ENSP00000323879 | ZNRF2     | 0.2447 |
| ENSP00000396402 | ZNF793    | 0.2447 |
| ENSP00000391641 | ZNF780B   | 0.2447 |
| ENSP00000365906 | ZNF615    | 0.2447 |
| ENSP00000338860 | ZNF444    | 0.2447 |
| ENSP00000211936 | ZNF184    | 0.2447 |
| ENSP00000277540 | WDR85     | 0.2447 |
| ENSP00000329654 | WBSCR17   | 0.2447 |
| ENSP00000353971 | TTI2      | 0.2447 |
| ENSP00000226230 | TMEM97    | 0.2447 |
| ENSP00000281961 | TMEM178A  | 0.2447 |
| ENSP00000304032 | STARD5    | 0.2447 |
| ENSP00000418593 | SNX21     | 0.2447 |
| ENSP00000332062 | SNX20     | 0.2447 |

|                 |              |        |
|-----------------|--------------|--------|
| ENSP00000327467 | SMDT1        | 0.2447 |
| ENSP00000338627 | SLC6A16      | 0.2447 |
| ENSP00000325414 | SERTAD3      | 0.2447 |
| ENSP00000294435 | RBP7         | 0.2447 |
| ENSP00000357122 | PYHIN1       | 0.2447 |
| ENSP00000465932 | PRCD         | 0.2447 |
| ENSP00000344140 | PPP1R32      | 0.2447 |
| ENSP00000447852 | POC1B-GALNT4 | 0.2447 |
| ENSP00000247226 | PLEKHG3      | 0.2447 |
| ENSP00000356634 | PAPPA2       | 0.2447 |
| ENSP00000322939 | OR56B1       | 0.2447 |
| ENSP00000327585 | OR1D2        | 0.2447 |
| ENSP00000330075 | OGFOD3       | 0.2447 |
| ENSP00000363431 | NPY4R        | 0.2447 |
| ENSP00000310631 | MRGPRD       | 0.2447 |
| ENSP00000264968 | MGAT4A       | 0.2447 |
| ENSP00000334219 | MEGF8        | 0.2447 |
| ENSP00000426359 | MCIDAS       | 0.2447 |
| ENSP00000328410 | MACC1        | 0.2447 |
| ENSP00000379651 | LILRA6       | 0.2447 |
| ENSP00000417116 | LBX2         | 0.2447 |
| ENSP00000375238 | KRTAP2-1     | 0.2447 |
| ENSP00000452237 | KRT86        | 0.2447 |
| ENSP00000225899 | KRT32        | 0.2447 |
| ENSP00000355720 | JMJD4        | 0.2447 |
| ENSP00000410925 | GPR42        | 0.2447 |
| ENSP00000296862 | GPR111       | 0.2447 |
| ENSP00000456927 | GOLGA8M      | 0.2447 |
| ENSP00000223145 | GLCCI1       | 0.2447 |
| ENSP00000307617 | GGNBP2       | 0.2447 |
| ENSP00000336729 | GALNT16      | 0.2447 |
| ENSP00000366233 | GABBR1       | 0.2447 |
| ENSP00000379026 | FBXW10       | 0.2447 |
| ENSP00000374328 | FAXC         | 0.2447 |
| ENSP00000380734 | FAM98B       | 0.2447 |
| ENSP00000362187 | FAM102A      | 0.2447 |
| ENSP00000358857 | EMD          | 0.2447 |
| ENSP00000389455 | DIRC3        | 0.2447 |
| ENSP00000216775 | CPNE6        | 0.2447 |
| ENSP00000450144 | CHURC1       | 0.2447 |
| ENSP00000309285 | CCDC96       | 0.2447 |
| ENSP00000330361 | C8orf33      | 0.2447 |
| ENSP00000367330 | C12orf73     | 0.2447 |
| ENSP00000325508 | C11orf71     | 0.2447 |
| ENSP00000299353 | C10ORF32     | 0.2447 |
| ENSP00000361281 | BEST4        | 0.2447 |
| ENSP00000337144 | AQP12A       | 0.2447 |
| ENSP00000358105 | APH1A        | 0.2447 |
| ENSP00000285243 | ANKRD40      | 0.2447 |
| ENSP00000308606 | AGR3         | 0.2447 |
| ENSP00000361083 | ADIRF        | 0.2447 |
| ENSP00000415978 | FAM74A2      | 0.2447 |
| ENSP00000282292 | ZNF773       | 0.2421 |

|                 |              |        |
|-----------------|--------------|--------|
| ENSP00000380237 | ZNF691       | 0.2421 |
| ENSP00000324441 | ZNF610       | 0.2421 |
| ENSP00000252840 | ZNF557       | 0.2421 |
| ENSP00000347755 | ZNF140       | 0.2421 |
| ENSP00000250160 | WISP1        | 0.2421 |
| ENSP00000362111 | TSPAN6       | 0.2421 |
| ENSP00000249861 | THAP10       | 0.2421 |
| ENSP00000373539 | STAB2        | 0.2421 |
| ENSP00000225276 | ST6GALNAC2   | 0.2421 |
| ENSP00000290902 | SPON2        | 0.2421 |
| ENSP00000417806 | SMIM4        | 0.2421 |
| ENSP00000335557 | SLX4IP       | 0.2421 |
| ENSP00000367137 | SLC17A4      | 0.2421 |
| ENSP00000385899 | SDK1         | 0.2421 |
| ENSP00000451369 | RP11-371E8.4 | 0.2421 |
| ENSP00000310335 | REP15        | 0.2421 |
| ENSP00000240651 | PYROXD1      | 0.2421 |
| ENSP00000354498 | PHLDB1       | 0.2421 |
| ENSP00000322530 | PGBD5        | 0.2421 |
| ENSP00000226524 | PF4V1        | 0.2421 |
| ENSP00000379691 | PDXDC1       | 0.2421 |
| ENSP00000265192 | PAIP2        | 0.2421 |
| ENSP00000371377 | OR1A2        | 0.2421 |
| ENSP00000305207 | OR1A1        | 0.2421 |
| ENSP00000306070 | NUDT6        | 0.2421 |
| ENSP00000346335 | NRDE2        | 0.2421 |
| ENSP00000411584 | MSANTD1      | 0.2421 |
| ENSP00000379156 | MPRIP        | 0.2421 |
| ENSP00000245551 | MIF4GD       | 0.2421 |
| ENSP00000362136 | MANEAL       | 0.2421 |
| ENSP00000310880 | MAL          | 0.2421 |
| ENSP00000410481 | LTB          | 0.2421 |
| ENSP00000377558 | KRT35        | 0.2421 |
| ENSP00000251691 | KIAA1244     | 0.2421 |
| ENSP00000261244 | KIAA0586     | 0.2421 |
| ENSP00000299732 | IQCD         | 0.2421 |
| ENSP00000306523 | INSM2        | 0.2421 |
| ENSP00000259212 | IL36RN       | 0.2421 |
| ENSP00000348815 | HYLS1        | 0.2421 |
| ENSP00000374268 | GXYLT2       | 0.2421 |
| ENSP00000331600 | GPR173       | 0.2421 |
| ENSP00000455826 | GOLGA8T      | 0.2421 |
| ENSP00000426691 | GOLGA8K      | 0.2421 |
| ENSP00000456401 | GOLGA8J      | 0.2421 |
| ENSP00000301329 | GLOD4        | 0.2421 |
| ENSP00000223293 | GIMAP2       | 0.2421 |
| ENSP00000305334 | FSTL5        | 0.2421 |
| ENSP00000308292 | FAM170B      | 0.2421 |
| ENSP00000289921 | FAM160B2     | 0.2421 |
| ENSP00000297435 | DEFA4        | 0.2421 |
| ENSP00000417289 | CTAGE8       | 0.2421 |
| ENSP00000420384 | CST7         | 0.2421 |
| ENSP00000361926 | CNPY3        | 0.2421 |



|                 |           |        |
|-----------------|-----------|--------|
| ENSP00000255784 | CCDC134   | 0.2421 |
| ENSP00000408730 | CCDC124   | 0.2421 |
| ENSP00000313816 | CCDC111   | 0.2421 |
| ENSP00000360642 | CC2D1B    | 0.2421 |
| ENSP00000349732 | C3orf18   | 0.2421 |
| ENSP00000382794 | C14orf164 | 0.2421 |
| ENSP00000434385 | ADIG      | 0.2421 |
| ENSP00000377078 | AAMDC     | 0.2421 |
| ENSP00000467286 | ZNF763    | 0.2395 |
| ENSP00000469582 | ZNF729    | 0.2395 |
| ENSP00000364405 | ZNF367    | 0.2395 |
| ENSP00000307774 | ZNF239    | 0.2395 |
| ENSP00000315664 | ZNF18     | 0.2395 |
| ENSP00000361800 | WDR34     | 0.2395 |
| ENSP00000350102 | TOR4A     | 0.2395 |
| ENSP00000256255 | TMEM66    | 0.2395 |
| ENSP00000312615 | TMEM134   | 0.2395 |
| ENSP00000407497 | SPINK8    | 0.2395 |
| ENSP00000388741 | SPATA3    | 0.2395 |
| ENSP00000358794 | SLC16A4   | 0.2395 |
| ENSP00000219315 | SETD6     | 0.2395 |
| ENSP00000356071 | SERAC1    | 0.2395 |
| ENSP00000431971 | SAMD1     | 0.2395 |
| ENSP00000218340 | RP2       | 0.2395 |
| ENSP00000312134 | PRG2      | 0.2395 |
| ENSP00000218224 | PQBP1     | 0.2395 |
| ENSP00000417038 | PHACTR2   | 0.2395 |
| ENSP00000363242 | PGBD3     | 0.2395 |
| ENSP00000300778 | OR51Q1    | 0.2395 |
| ENSP00000326225 | OR2T8     | 0.2395 |
| ENSP00000265634 | NPTX2     | 0.2395 |
| ENSP00000395232 | MTFR2     | 0.2395 |
| ENSP00000359819 | MOSPD1    | 0.2395 |
| ENSP00000287701 | HMBOX1    | 0.2395 |
| ENSP00000264779 | GPBP1     | 0.2395 |
| ENSP00000398615 | GOLGA6L6  | 0.2395 |
| ENSP00000278187 | GAS2      | 0.2395 |
| ENSP00000332757 | FUT10     | 0.2395 |
| ENSP00000221498 | DKKL1     | 0.2395 |
| ENSP00000417128 | DEFB121   | 0.2395 |
| ENSP00000310901 | CSRP2     | 0.2395 |
| ENSP00000326538 | CLEC18C   | 0.2395 |
| ENSP00000297788 | CCDC136   | 0.2395 |
| ENSP00000318912 | CA13      | 0.2395 |
| ENSP00000284437 | C4orf19   | 0.2395 |
| ENSP00000295966 | C3orf67   | 0.2395 |
| ENSP00000362376 | C10orf35  | 0.2395 |
| ENSP00000328698 | C10orf107 | 0.2395 |
| ENSP00000338072 | AVPR2     | 0.2395 |
| ENSP00000350686 | ANKLE2    | 0.2395 |
| ENSP00000292530 | ZNF333    | 0.2368 |
| ENSP00000366542 | ZNF165    | 0.2368 |
| ENSP00000343581 | ZFP30     | 0.2368 |

|                 |          |        |
|-----------------|----------|--------|
| ENSP00000261789 | TM9SF1   | 0.2368 |
| ENSP00000268138 | TICRR    | 0.2368 |
| ENSP00000258991 | TEX2     | 0.2368 |
| ENSP00000385122 | SYCE3    | 0.2368 |
| ENSP00000309189 | SPERT    | 0.2368 |
| ENSP00000261369 | SNX24    | 0.2368 |
| ENSP00000313121 | SNX14    | 0.2368 |
| ENSP00000371036 | SIRPD    | 0.2368 |
| ENSP00000370126 | SERF1B   | 0.2368 |
| ENSP00000297613 | RPP25L   | 0.2368 |
| ENSP00000282003 | RNF219   | 0.2368 |
| ENSP00000303276 | RNASE2   | 0.2368 |
| ENSP00000280571 | RILPL2   | 0.2368 |
| ENSP00000354361 | RFWD3    | 0.2368 |
| ENSP00000264644 | RAPGEFL1 | 0.2368 |
| ENSP00000253796 | RAMP2    | 0.2368 |
| ENSP00000387654 | PCYOX1   | 0.2368 |
| ENSP00000441802 | PCDH7    | 0.2368 |
| ENSP00000341171 | MTSS1L   | 0.2368 |
| ENSP00000343212 | MAP3K7CL | 0.2368 |
| ENSP00000472698 | L34079.2 | 0.2368 |
| ENSP00000405032 | GSG1     | 0.2368 |
| ENSP00000348550 | FRMD6    | 0.2368 |
| ENSP00000237281 | FBXO30   | 0.2368 |
| ENSP00000442365 | EML2     | 0.2368 |
| ENSP00000369976 | EGFL6    | 0.2368 |
| ENSP00000320303 | DNAJC28  | 0.2368 |
| ENSP00000253381 | DEFB118  | 0.2368 |
| ENSP00000339511 | CXorf27  | 0.2368 |
| ENSP00000337209 | CCDC68   | 0.2368 |
| ENSP00000370077 | CCDC171  | 0.2368 |
| ENSP00000426159 | C6orf223 | 0.2368 |
| ENSP00000326879 | C5orf22  | 0.2368 |
| ENSP00000231512 | C5orf15  | 0.2368 |
| ENSP00000384965 | C22orf15 | 0.2368 |
| ENSP00000394472 | BTBD18   | 0.2368 |
| ENSP00000379290 | BCAS1    | 0.2368 |
| ENSP00000381844 | ATL3     | 0.2368 |
| ENSP00000298694 | ARHGEF40 | 0.2368 |
| ENSP00000216099 | APOBEC3D | 0.2368 |
| ENSP00000234816 | ANGPTL1  | 0.2368 |
| ENSP00000426528 | AMER2    | 0.2368 |
| ENSP00000374071 | ADAMTS20 | 0.2368 |
| ENSP00000249005 | A4GALT   | 0.2368 |
| ENSP00000300619 | ZNF91    | 0.2342 |
| ENSP00000374185 | ZNF841   | 0.2342 |
| ENSP00000254321 | ZNF700   | 0.2342 |
| ENSP00000324605 | ZNF660   | 0.2342 |
| ENSP00000322427 | ZNF611   | 0.2342 |
| ENSP00000382237 | TMEM26   | 0.2342 |
| ENSP00000383594 | TMEM242  | 0.2342 |
| ENSP00000379901 | TMEM106B | 0.2342 |
| ENSP00000331500 | TEX19    | 0.2342 |

|                 |           |        |
|-----------------|-----------|--------|
| ENSP00000415564 | TCEAL4    | 0.2342 |
| ENSP00000363573 | SRSF10    | 0.2342 |
| ENSP00000377176 | SPATA7    | 0.2342 |
| ENSP00000326070 | SLC41A3   | 0.2342 |
| ENSP00000295959 | RPP14     | 0.2342 |
| ENSP00000275423 | RBAK      | 0.2342 |
| ENSP00000356574 | QSOX1     | 0.2342 |
| ENSP00000165524 | PRLH      | 0.2342 |
| ENSP00000301286 | PLIN4     | 0.2342 |
| ENSP00000381628 | PCDHA12   | 0.2342 |
| ENSP00000357448 | PBXIP1    | 0.2342 |
| ENSP00000323872 | P2RY11    | 0.2342 |
| ENSP00000263084 | OVCA2     | 0.2342 |
| ENSP00000461388 | OVCA2     | 0.2342 |
| ENSP00000356110 | NUCKS1    | 0.2342 |
| ENSP00000382883 | MAGEB17   | 0.2342 |
| ENSP00000230538 | LAMA4     | 0.2342 |
| ENSP00000332805 | KRTAP8-1  | 0.2342 |
| ENSP00000375430 | KRTAP3-1  | 0.2342 |
| ENSP00000382777 | KRTAP13-2 | 0.2342 |
| ENSP00000371328 | KLRC3     | 0.2342 |
| ENSP00000193391 | IMPG2     | 0.2342 |
| ENSP00000341794 | IL1F10    | 0.2342 |
| ENSP00000255039 | HAPLN2    | 0.2342 |
| ENSP00000333744 | GPR19     | 0.2342 |
| ENSP00000307831 | GPR113    | 0.2342 |
| ENSP00000298110 | GPR101    | 0.2342 |
| ENSP00000349884 | GALP      | 0.2342 |
| ENSP00000265825 | FSCN3     | 0.2342 |
| ENSP00000344572 | FIBP      | 0.2342 |
| ENSP00000296438 | FBXW12    | 0.2342 |
| ENSP00000307798 | FAM90A1   | 0.2342 |
| ENSP00000400099 | FAM65A    | 0.2342 |
| ENSP00000364814 | FAM131C   | 0.2342 |
| ENSP00000432104 | EBLN2     | 0.2342 |
| ENSP00000344432 | DOK7      | 0.2342 |
| ENSP00000354830 | DDIT4L    | 0.2342 |
| ENSP00000307132 | CST5      | 0.2342 |
| ENSP00000304544 | COMMD5    | 0.2342 |
| ENSP00000326407 | CLEC1A    | 0.2342 |
| ENSP00000284224 | CHST9     | 0.2342 |
| ENSP00000365401 | CCDC22    | 0.2342 |
| ENSP00000412150 | CCDC121   | 0.2342 |
| ENSP00000364260 | C9orf156  | 0.2342 |
| ENSP00000448536 | C12orf75  | 0.2342 |
| ENSP00000339637 | BRAT1     | 0.2342 |
| ENSP00000442521 | BEX2      | 0.2342 |
| ENSP00000356404 | B3GALT2   | 0.2342 |
| ENSP00000305502 | ASCC2     | 0.2342 |
| ENSP00000340297 | ARHGEF10  | 0.2342 |
| ENSP00000371983 | AFAP1     | 0.2342 |
| ENSP00000352846 | ZNF808    | 0.2316 |
| ENSP00000331927 | ZNF789    | 0.2316 |

|                 |              |        |
|-----------------|--------------|--------|
| ENSP00000311768 | ZNF706       | 0.2316 |
| ENSP00000380310 | ZNF676       | 0.2316 |
| ENSP00000319305 | ZNF572       | 0.2316 |
| ENSP00000376010 | ZNF566       | 0.2316 |
| ENSP00000407130 | ZNF410       | 0.2316 |
| ENSP00000324064 | ZNF354C      | 0.2316 |
| ENSP00000411097 | ZNF275       | 0.2316 |
| ENSP00000380315 | ZNF208       | 0.2316 |
| ENSP00000349568 | WDR96        | 0.2316 |
| ENSP00000359160 | TRMT13       | 0.2316 |
| ENSP00000364938 | TMEM82       | 0.2316 |
| ENSP00000259746 | TMEM63B      | 0.2316 |
| ENSP00000359449 | TMEM185A     | 0.2316 |
| ENSP00000259782 | TINAG        | 0.2316 |
| ENSP00000296125 | TGM4         | 0.2316 |
| ENSP00000357739 | SPRR2E       | 0.2316 |
| ENSP00000254853 | SLC52A1      | 0.2316 |
| ENSP00000355467 | SCCPDH       | 0.2316 |
| ENSP00000430242 | SBSN         | 0.2316 |
| ENSP00000337732 | RUNDC3B      | 0.2316 |
| ENSP00000314992 | RRH          | 0.2316 |
| ENSP00000453573 | RP13-996F3.5 | 0.2316 |
| ENSP00000265981 | RNF141       | 0.2316 |
| ENSP00000385927 | RMDN1        | 0.2316 |
| ENSP00000366070 | RILPL1       | 0.2316 |
| ENSP00000254661 | RAMP1        | 0.2316 |
| ENSP00000333456 | RAI2         | 0.2316 |
| ENSP00000279575 | PRB4         | 0.2316 |
| ENSP00000380880 | PQLC1        | 0.2316 |
| ENSP00000264231 | POPDC2       | 0.2316 |
| ENSP00000346127 | PLEKHB1      | 0.2316 |
| ENSP00000463094 | PIEZO2       | 0.2316 |
| ENSP00000324403 | PHF21B       | 0.2316 |
| ENSP00000312070 | PCDHGC3      | 0.2316 |
| ENSP00000231134 | PCDHB5       | 0.2316 |
| ENSP00000436557 | PCDHA5       | 0.2316 |
| ENSP00000244623 | OR2B6        | 0.2316 |
| ENSP00000407978 | NKX1-1       | 0.2316 |
| ENSP00000419000 | LSAMP        | 0.2316 |
| ENSP00000221797 | LGALS13      | 0.2316 |
| ENSP00000257696 | HILPDA       | 0.2316 |
| ENSP00000339750 | GTDC1        | 0.2316 |
| ENSP00000319673 | GPR89A       | 0.2316 |
| ENSP00000261654 | GPR133       | 0.2316 |
| ENSP00000343890 | GLTPD1       | 0.2316 |
| ENSP00000370262 | FREM1        | 0.2316 |
| ENSP00000334364 | DEFB106B     | 0.2316 |
| ENSP00000369009 | CXorf23      | 0.2316 |
| ENSP00000299663 | CLEC4E       | 0.2316 |
| ENSP00000357149 | CD1E         | 0.2316 |
| ENSP00000235933 | CD160        | 0.2316 |
| ENSP00000064571 | CBLN4        | 0.2316 |
| ENSP00000295622 | C3orf30      | 0.2316 |

|                 |            |        |
|-----------------|------------|--------|
| ENSP00000332809 | C2orf71    | 0.2316 |
| ENSP00000373586 | C2orf54    | 0.2316 |
| ENSP00000360320 | C1orf177   | 0.2316 |
| ENSP00000319179 | C1orf172   | 0.2316 |
| ENSP00000326846 | C14orf28   | 0.2316 |
| ENSP00000377369 | C14orf166B | 0.2316 |
| ENSP00000360312 | BSND       | 0.2316 |
| ENSP00000354536 | ASTN1      | 0.2316 |
| ENSP00000303570 | ANKMY2     | 0.2316 |
| ENSP00000362524 | ANGPTL2    | 0.2316 |
| ENSP00000346478 | ADAMTSL2   | 0.2316 |
| ENSP00000269829 | ZNF544     | 0.2289 |
| ENSP00000379168 | ZNF287     | 0.2289 |
| ENSP00000282869 | ZNF117     | 0.2289 |
| ENSP00000322872 | ZKSCAN5    | 0.2289 |
| ENSP00000285279 | VOPP1      | 0.2289 |
| ENSP00000329548 | TUSC5      | 0.2289 |
| ENSP00000422188 | TTC23L     | 0.2289 |
| ENSP00000362122 | TNMD       | 0.2289 |
| ENSP00000280734 | TMEM86A    | 0.2289 |
| ENSP00000366243 | TMEM2      | 0.2289 |
| ENSP00000005286 | TMEM132A   | 0.2289 |
| ENSP00000324651 | TMEM108    | 0.2289 |
| ENSP00000405482 | SVOPL      | 0.2289 |
| ENSP00000322652 | SNX16      | 0.2289 |
| ENSP00000385025 | SMCR8      | 0.2289 |
| ENSP00000359376 | SLC17A9    | 0.2289 |
| ENSP00000326933 | SERTAD2    | 0.2289 |
| ENSP00000367173 | RNF207     | 0.2289 |
| ENSP00000351536 | QSOX2      | 0.2289 |
| ENSP00000396732 | PRDM7      | 0.2289 |
| ENSP00000349274 | PPP1R26    | 0.2289 |
| ENSP00000228705 | PPM1H      | 0.2289 |
| ENSP00000414208 | POM121C    | 0.2289 |
| ENSP00000382323 | OTOG       | 0.2289 |
| ENSP00000324769 | OR4C6      | 0.2289 |
| ENSP00000272641 | NXPH2      | 0.2289 |
| ENSP00000371126 | NUTM2A     | 0.2289 |
| ENSP00000307722 | NSG2       | 0.2289 |
| ENSP00000362841 | NKAIN1     | 0.2289 |
| ENSP00000347170 | NEIL1      | 0.2289 |
| ENSP00000257776 | MRAP2      | 0.2289 |
| ENSP00000381928 | MGARP      | 0.2289 |
| ENSP00000354583 | MFAP3L     | 0.2289 |
| ENSP00000244333 | LYPD3      | 0.2289 |
| ENSP00000301263 | LY6D       | 0.2289 |
| ENSP00000311905 | LTBP4      | 0.2289 |
| ENSP00000360753 | LCN8       | 0.2289 |
| ENSP00000342215 | KIR2DL3    | 0.2289 |
| ENSP00000353129 | KCTD8      | 0.2289 |
| ENSP00000362836 | KCTD20     | 0.2289 |
| ENSP00000300098 | GPR182     | 0.2289 |
| ENSP00000379946 | GLTSCR1    | 0.2289 |

|                 |           |        |
|-----------------|-----------|--------|
| ENSP00000243913 | GCNT7     | 0.2289 |
| ENSP00000248598 | FGL2      | 0.2289 |
| ENSP00000363482 | FAM21C    | 0.2289 |
| ENSP00000263256 | DESI1     | 0.2289 |
| ENSP00000319831 | DEF6      | 0.2289 |
| ENSP00000360167 | DCAF12L1  | 0.2289 |
| ENSP00000265136 | COBL      | 0.2289 |
| ENSP00000295324 | CDC42EP3  | 0.2289 |
| ENSP00000296238 | CAMK2N2   | 0.2289 |
| ENSP00000399947 | ASAH2C    | 0.2289 |
| ENSP00000299155 | AMN       | 0.2289 |
| ENSP00000356632 | ABRACL    | 0.2289 |
| ENSP00000366342 | ASB16-AS1 | 0.2289 |
| ENSP00000351482 | ZNF707    | 0.2263 |
| ENSP00000282296 | ZNF551    | 0.2263 |
| ENSP00000417424 | ZNF480    | 0.2263 |
| ENSP00000356064 | TULP4     | 0.2263 |
| ENSP00000402855 | TREML1    | 0.2263 |
| ENSP00000330264 | TMPRSS9   | 0.2263 |
| ENSP00000331640 | TMEM186   | 0.2263 |
| ENSP00000453399 | TMEM185B  | 0.2263 |
| ENSP00000424707 | TMEM167A  | 0.2263 |
| ENSP00000326244 | TMEM151A  | 0.2263 |
| ENSP00000354774 | SPRYD7    | 0.2263 |
| ENSP00000405210 | SPANXN4   | 0.2263 |
| ENSP00000427407 | SMIM20    | 0.2263 |
| ENSP00000366645 | SCP2D1    | 0.2263 |
| ENSP00000350976 | RTP2      | 0.2263 |
| ENSP00000418667 | RGAG4     | 0.2263 |
| ENSP00000270077 | PSG9      | 0.2263 |
| ENSP00000401932 | PRSS45    | 0.2263 |
| ENSP00000378072 | PNPLA1    | 0.2263 |
| ENSP00000304192 | PCNX      | 0.2263 |
| ENSP00000361486 | PCIF1     | 0.2263 |
| ENSP00000342448 | OR5W2     | 0.2263 |
| ENSP00000319601 | OR4N2     | 0.2263 |
| ENSP00000378516 | OR10W1    | 0.2263 |
| ENSP00000307552 | NINJ2     | 0.2263 |
| ENSP00000444617 | NHSL2     | 0.2263 |
| ENSP00000355198 | MAGEB3    | 0.2263 |
| ENSP00000327533 | LYG2      | 0.2263 |
| ENSP00000332103 | LSMD1     | 0.2263 |
| ENSP00000405165 | LIMS3     | 0.2263 |
| ENSP00000381488 | KRTAP9-1  | 0.2263 |
| ENSP00000359768 | KIAA1586  | 0.2263 |
| ENSP00000347178 | HSPB9     | 0.2263 |
| ENSP00000456894 | GOLGA8H   | 0.2263 |
| ENSP00000369907 | FAM154A   | 0.2263 |
| ENSP00000409256 | EFCAB4A   | 0.2263 |
| ENSP00000371847 | DEFB125   | 0.2263 |
| ENSP00000264192 | CYTIP     | 0.2263 |
| ENSP00000318258 | CSRNP3    | 0.2263 |
| ENSP00000359594 | CLCA4     | 0.2263 |

|                 |           |        |
|-----------------|-----------|--------|
| ENSP00000256785 | CFHR5     | 0.2263 |
| ENSP00000252992 | CEP85     | 0.2263 |
| ENSP00000361336 | CDH22     | 0.2263 |
| ENSP00000362085 | C9orf16   | 0.2263 |
| ENSP00000322061 | C7        | 0.2263 |
| ENSP00000386190 | C2orf16   | 0.2263 |
| ENSP00000355609 | C1orf131  | 0.2263 |
| ENSP00000284694 | C10orf90  | 0.2263 |
| ENSP00000400157 | B3GNT9    | 0.2263 |
| ENSP00000386280 | APOL6     | 0.2263 |
| ENSP00000357943 | ANXA9     | 0.2263 |
| ENSP00000379568 | ACBD5     | 0.2263 |
| ENSP00000360069 | ZNF831    | 0.2237 |
| ENSP00000440403 | ZNF678    | 0.2237 |
| ENSP00000422344 | ZNF550    | 0.2237 |
| ENSP00000278772 | ZNF343    | 0.2237 |
| ENSP00000262990 | ZNF330    | 0.2237 |
| ENSP00000418719 | ZNF273    | 0.2237 |
| ENSP00000457704 | ZNF10     | 0.2237 |
| ENSP00000217299 | XKR7      | 0.2237 |
| ENSP00000190983 | WISP2     | 0.2237 |
| ENSP00000331087 | TSSC4     | 0.2237 |
| ENSP00000301599 | TMEM88    | 0.2237 |
| ENSP00000340668 | TMEM248   | 0.2237 |
| ENSP00000292894 | THAP8     | 0.2237 |
| ENSP00000225777 | SYNGR2    | 0.2237 |
| ENSP00000351075 | SUSD2     | 0.2237 |
| ENSP00000310814 | STARD6    | 0.2237 |
| ENSP00000009041 | STARD3NL  | 0.2237 |
| ENSP00000369080 | SPEF1     | 0.2237 |
| ENSP00000316012 | SPAG11A   | 0.2237 |
| ENSP00000346990 | SCARA5    | 0.2237 |
| ENSP00000364956 | PLEKHM2   | 0.2237 |
| ENSP00000330278 | PLEKHH1   | 0.2237 |
| ENSP00000406909 | PHOSPHO1  | 0.2237 |
| ENSP00000429808 | PCDHA3    | 0.2237 |
| ENSP00000355082 | PCDH18    | 0.2237 |
| ENSP00000359382 | PASD1     | 0.2237 |
| ENSP00000319511 | OR4K5     | 0.2237 |
| ENSP00000307852 | NUDT18    | 0.2237 |
| ENSP00000286733 | NAAA      | 0.2237 |
| ENSP00000318086 | MAP7D3    | 0.2237 |
| ENSP00000337950 | LYNX1     | 0.2237 |
| ENSP00000270452 | LILRB4    | 0.2237 |
| ENSP00000381542 | KRTAP5-10 | 0.2237 |
| ENSP00000330746 | KRTAP20-2 | 0.2237 |
| ENSP00000334985 | KRTAP19-5 | 0.2237 |
| ENSP00000246646 | KRT38     | 0.2237 |
| ENSP00000167588 | KRT20     | 0.2237 |
| ENSP00000305200 | IL1RAPL1  | 0.2237 |
| ENSP00000238609 | IFI27L2   | 0.2237 |
| ENSP00000371929 | HTR3D     | 0.2237 |
| ENSP00000355228 | HMGN2     | 0.2237 |

|                 |                 |        |
|-----------------|-----------------|--------|
| ENSP00000305839 | GPRIN1          | 0.2237 |
| ENSP00000319250 | GPR62           | 0.2237 |
| ENSP00000281703 | GLT1D1          | 0.2237 |
| ENSP00000323075 | GAPT            | 0.2237 |
| ENSP00000267426 | FITM1           | 0.2237 |
| ENSP00000259988 | FGFBP1          | 0.2237 |
| ENSP00000355614 | FAM89A          | 0.2237 |
| ENSP00000351138 | FAM73B          | 0.2237 |
| ENSP00000319336 | FAM216B         | 0.2237 |
| ENSP00000254624 | EFR3A           | 0.2237 |
| ENSP00000361276 | DYDC1           | 0.2237 |
| ENSP00000307860 | DIRC1           | 0.2237 |
| ENSP00000392568 | DEFB130         | 0.2237 |
| ENSP00000246105 | DEFB129         | 0.2237 |
| ENSP00000226951 | CLNK            | 0.2237 |
| ENSP00000298527 | CLEC1B          | 0.2237 |
| ENSP00000263284 | CCDC61          | 0.2237 |
| ENSP00000313601 | CC2D1A          | 0.2237 |
| ENSP00000374183 | CAMSAP1         | 0.2237 |
| ENSP00000355306 | C1orf174        | 0.2237 |
| ENSP00000369739 | BPHL            | 0.2237 |
| ENSP00000453153 | BLID            | 0.2237 |
| ENSP00000442793 | BEAN1           | 0.2237 |
| ENSP00000249044 | APOL5           | 0.2237 |
| ENSP00000256737 | ANO3            | 0.2237 |
| ENSP00000310459 | AKIP1           | 0.2237 |
| ENSP00000257359 | ADAMTS8         | 0.2237 |
| ENSP00000455585 | ZNF853          | 0.2211 |
| ENSP00000337122 | ZNF354A         | 0.2211 |
| ENSP00000337473 | ZNF324B         | 0.2211 |
| ENSP00000336719 | ZNF226          | 0.2211 |
| ENSP00000263805 | ZNF106          | 0.2211 |
| ENSP00000372361 | ZMYM5           | 0.2211 |
| ENSP00000362360 | ZHX3            | 0.2211 |
| ENSP00000428966 | ZFP41           | 0.2211 |
| ENSP00000264031 | UPK2            | 0.2211 |
| ENSP00000279907 | UHRF1BP1L       | 0.2211 |
| ENSP00000357575 | TTC40           | 0.2211 |
| ENSP00000370419 | TTC38           | 0.2211 |
| ENSP00000353785 | TPPP            | 0.2211 |
| ENSP00000293826 | TNFSF12-TNFSF13 | 0.2211 |
| ENSP00000361311 | TMEM53          | 0.2211 |
| ENSP00000422431 | TMEM158         | 0.2211 |
| ENSP00000273695 | TM4SF19         | 0.2211 |
| ENSP00000273590 | TCTA            | 0.2211 |
| ENSP00000217428 | SPINT3          | 0.2211 |
| ENSP00000295958 | SMIM14          | 0.2211 |
| ENSP00000266077 | SLC2A4RG        | 0.2211 |
| ENSP00000344801 | SLC24A2         | 0.2211 |
| ENSP00000383939 | SETD5           | 0.2211 |
| ENSP00000436496 | RP11-481A20.11  | 0.2211 |
| ENSP00000358703 | RIPPLY2         | 0.2211 |
| ENSP00000262753 | POF1B           | 0.2211 |



|                 |                |        |
|-----------------|----------------|--------|
| ENSP00000258526 | PLXNC1         | 0.2211 |
| ENSP00000362778 | PI16           | 0.2211 |
| ENSP00000231137 | PCDHB7         | 0.2211 |
| ENSP00000194155 | PCDHB2         | 0.2211 |
| ENSP00000342008 | OR2T27         | 0.2211 |
| ENSP00000329448 | NUTM1          | 0.2211 |
| ENSP00000222674 | NPVF           | 0.2211 |
| ENSP00000295440 | NPPC           | 0.2211 |
| ENSP00000302037 | MFF            | 0.2211 |
| ENSP00000357829 | METTL10        | 0.2211 |
| ENSP00000357772 | LCE2C          | 0.2211 |
| ENSP00000335660 | KRTAP19-2      | 0.2211 |
| ENSP00000352941 | KCTD18         | 0.2211 |
| ENSP00000361173 | KCNE1L         | 0.2211 |
| ENSP00000327786 | IZUMO1         | 0.2211 |
| ENSP00000380041 | INCA1          | 0.2211 |
| ENSP00000301790 | HRASLS5        | 0.2211 |
| ENSP00000255695 | HRASLS2        | 0.2211 |
| ENSP00000291481 | HAPLN4         | 0.2211 |
| ENSP00000427690 | GYPB           | 0.2211 |
| ENSP00000398454 | GOLGA8N        | 0.2211 |
| ENSP00000313933 | GLTSCR1L       | 0.2211 |
| ENSP00000399938 | FLYWCH1        | 0.2211 |
| ENSP00000351740 | FAM114A1       | 0.2211 |
| ENSP00000463517 | EGFL8          | 0.2211 |
| ENSP00000354643 | DIO1           | 0.2211 |
| ENSP00000254337 | DCAF15         | 0.2211 |
| ENSP00000372459 | CTIF           | 0.2211 |
| ENSP00000470240 | CTD-2192J16.22 | 0.2211 |
| ENSP00000332602 | CTAG1B         | 0.2211 |
| ENSP00000371193 | CPPED1         | 0.2211 |
| ENSP00000261883 | CILP           | 0.2211 |
| ENSP00000249014 | CDC42EP1       | 0.2211 |
| ENSP00000295226 | CCDC140        | 0.2211 |
| ENSP00000376823 | C7orf49        | 0.2211 |
| ENSP00000386184 | C5orf54        | 0.2211 |
| ENSP00000352704 | C20orf112      | 0.2211 |
| ENSP00000307765 | C17orf62       | 0.2211 |
| ENSP00000306320 | C14orf142      | 0.2211 |
| ENSP00000331581 | C11orf87       | 0.2211 |
| ENSP00000414390 | C11orf70       | 0.2211 |
| ENSP00000262126 | ANKRD12        | 0.2211 |
| ENSP00000434258 | ZNF623         | 0.2211 |
| ENSP00000388311 | ZNF845         | 0.2184 |
| ENSP00000252799 | ZNF747         | 0.2184 |
| ENSP00000329264 | ZNF662         | 0.2184 |
| ENSP00000377504 | ZNF414         | 0.2184 |
| ENSP00000420418 | ZNF398         | 0.2184 |
| ENSP00000354680 | ZNF266         | 0.2184 |
| ENSP00000270014 | ZNF155         | 0.2184 |
| ENSP00000398798 | ZNF142         | 0.2184 |
| ENSP00000361411 | ZCCHC24        | 0.2184 |
| ENSP00000347997 | UBQLN3         | 0.2184 |

|                 |              |        |
|-----------------|--------------|--------|
| ENSP00000357906 | TNFAIP8L2    | 0.2184 |
| ENSP00000325561 | TMC8         | 0.2184 |
| ENSP00000342322 | TM7SF3       | 0.2184 |
| ENSP00000217320 | TLDC2        | 0.2184 |
| ENSP00000421489 | TIGD5        | 0.2184 |
| ENSP00000176763 | STK10        | 0.2184 |
| ENSP00000241274 | SLITRK3      | 0.2184 |
| ENSP00000345295 | SH2D4B       | 0.2184 |
| ENSP00000376421 | SDK2         | 0.2184 |
| ENSP00000354080 | SCUBE1       | 0.2184 |
| ENSP00000303070 | SCGB1D1      | 0.2184 |
| ENSP00000301995 | SCAND1       | 0.2184 |
| ENSP00000438042 | SAMD8        | 0.2184 |
| ENSP00000311712 | RTP1         | 0.2184 |
| ENSP00000455755 | RP11-12J10.3 | 0.2184 |
| ENSP00000364246 | PLA2G2D      | 0.2184 |
| ENSP00000252087 | PCDHGC5      | 0.2184 |
| ENSP00000355419 | PCDH11Y      | 0.2184 |
| ENSP00000307164 | PATE1        | 0.2184 |
| ENSP00000362682 | OLFML2A      | 0.2184 |
| ENSP00000297130 | MYOZ3        | 0.2184 |
| ENSP00000271139 | MOB3C        | 0.2184 |
| ENSP00000410818 | MAD2L1BP     | 0.2184 |
| ENSP00000470948 | LRLE1        | 0.2184 |
| ENSP00000357759 | LCE1E        | 0.2184 |
| ENSP00000381198 | KIAA1468     | 0.2184 |
| ENSP00000263468 | KIAA1377     | 0.2184 |
| ENSP00000341490 | ISM2         | 0.2184 |
| ENSP00000302676 | GPR22        | 0.2184 |
| ENSP00000271883 | GON4L        | 0.2184 |
| ENSP00000323217 | GOLGA8R      | 0.2184 |
| ENSP00000452706 | GOLGA6L9     | 0.2184 |
| ENSP00000391085 | GOLGA6D      | 0.2184 |
| ENSP00000419485 | GCSAM        | 0.2184 |
| ENSP00000396160 | FBRSL1       | 0.2184 |
| ENSP00000259963 | FAM8A1       | 0.2184 |
| ENSP00000257515 | FAM189A2     | 0.2184 |
| ENSP00000333779 | EVI2B        | 0.2184 |
| ENSP00000228865 | CREBL2       | 0.2184 |
| ENSP00000299721 | CPLX4        | 0.2184 |
| ENSP00000341360 | COBLL1       | 0.2184 |
| ENSP00000329158 | CLRN1        | 0.2184 |
| ENSP00000371505 | CLEC6A       | 0.2184 |
| ENSP00000341051 | CLEC18B      | 0.2184 |
| ENSP00000219197 | CBLN1        | 0.2184 |
| ENSP00000358107 | CA14         | 0.2184 |
| ENSP00000322469 | C3orf38      | 0.2184 |
| ENSP00000338885 | C2CD2L       | 0.2184 |
| ENSP00000217195 | C20orf27     | 0.2184 |
| ENSP00000377545 | C1QTNF2      | 0.2184 |
| ENSP00000297290 | BRI3         | 0.2184 |
| ENSP00000456645 | ALG9         | 0.2184 |
| ENSP00000375387 | AL356585.1   | 0.2184 |

|                 |           |        |
|-----------------|-----------|--------|
| ENSP00000357565 | ZUFSP     | 0.2158 |
| ENSP00000254323 | ZSWIM4    | 0.2158 |
| ENSP00000325038 | ZNF836    | 0.2158 |
| ENSP00000415774 | ZNF732    | 0.2158 |
| ENSP00000342818 | ZNF669    | 0.2158 |
| ENSP00000417696 | ZNF525    | 0.2158 |
| ENSP00000464872 | ZNF519    | 0.2158 |
| ENSP00000262894 | ZNF225    | 0.2158 |
| ENSP00000391742 | ZMYND15   | 0.2158 |
| ENSP00000452959 | ZMYND11   | 0.2158 |
| ENSP00000332750 | ZKSCAN8   | 0.2158 |
| ENSP00000250823 | VCY1B     | 0.2158 |
| ENSP00000370479 | VCX3A     | 0.2158 |
| ENSP00000290079 | TMEM141   | 0.2158 |
| ENSP00000317000 | TM6SF1    | 0.2158 |
| ENSP00000220420 | TGM5      | 0.2158 |
| ENSP00000272438 | TEX261    | 0.2158 |
| ENSP00000356536 | TEDDM1    | 0.2158 |
| ENSP00000383866 | SZRD1     | 0.2158 |
| ENSP00000240333 | SLC35B1   | 0.2158 |
| ENSP00000227918 | SCGB2A2   | 0.2158 |
| ENSP00000353769 | SCAF1     | 0.2158 |
| ENSP00000369547 | S100G     | 0.2158 |
| ENSP00000303206 | REG1B     | 0.2158 |
| ENSP00000266022 | RBM6      | 0.2158 |
| ENSP00000326018 | PRX       | 0.2158 |
| ENSP00000372649 | PRR23A    | 0.2158 |
| ENSP00000308926 | PPM1J     | 0.2158 |
| ENSP00000326706 | PLEKHO2   | 0.2158 |
| ENSP00000346227 | PKIB      | 0.2158 |
| ENSP00000305926 | OTUD7A    | 0.2158 |
| ENSP00000302639 | OR5AR1    | 0.2158 |
| ENSP00000259357 | OR1J1     | 0.2158 |
| ENSP00000397900 | MRO       | 0.2158 |
| ENSP00000277526 | LCN9      | 0.2158 |
| ENSP00000375107 | KRTAP19-6 | 0.2158 |
| ENSP00000378292 | KRT80     | 0.2158 |
| ENSP00000337850 | KPTN      | 0.2158 |
| ENSP00000358956 | IRAK1BP1  | 0.2158 |
| ENSP00000261796 | IL17B     | 0.2158 |
| ENSP00000353695 | GSTCD     | 0.2158 |
| ENSP00000365624 | GRIPAP1   | 0.2158 |
| ENSP00000260843 | GPR87     | 0.2158 |
| ENSP00000423159 | GOLGA8O   | 0.2158 |
| ENSP00000300576 | GOLGA6C   | 0.2158 |
| ENSP00000319726 | FRMD8     | 0.2158 |
| ENSP00000362684 | FAM167B   | 0.2158 |
| ENSP00000354597 | DENND4B   | 0.2158 |
| ENSP00000382951 | DEFB130   | 0.2158 |
| ENSP00000215770 | DDTL      | 0.2158 |
| ENSP00000262210 | CSPP1     | 0.2158 |
| ENSP00000378464 | CPLX3     | 0.2158 |
| ENSP00000222032 | CNFN      | 0.2158 |

|                 |            |        |
|-----------------|------------|--------|
| ENSP00000221804 | CLC        | 0.2158 |
| ENSP00000381428 | CGGBP1     | 0.2158 |
| ENSP00000310031 | CDRT4      | 0.2158 |
| ENSP00000339390 | CDH26      | 0.2158 |
| ENSP00000420298 | CD200      | 0.2158 |
| ENSP00000285871 | CCDC146    | 0.2158 |
| ENSP00000421871 | C5orf20    | 0.2158 |
| ENSP00000351642 | BCAS4      | 0.2158 |
| ENSP00000356094 | AVPR1B     | 0.2158 |
| ENSP00000368237 | ATL2       | 0.2158 |
| ENSP00000264992 | ASTE1      | 0.2158 |
| ENSP00000392678 | AKIRIN1    | 0.2158 |
| ENSP00000470441 | AC012313.1 | 0.2158 |
| ENSP00000284322 | ABI3BP     | 0.2158 |
| ENSP00000342974 | ZNF791     | 0.2132 |
| ENSP00000355459 | ZNF670     | 0.2132 |
| ENSP00000292841 | ZNF585A    | 0.2132 |
| ENSP00000339823 | ZNF546     | 0.2132 |
| ENSP00000465578 | ZNF529     | 0.2132 |
| ENSP00000302310 | ZNF396     | 0.2132 |
| ENSP00000466519 | ZNF229     | 0.2132 |
| ENSP00000248211 | ZNF10      | 0.2132 |
| ENSP00000354453 | ZFP2       | 0.2132 |
| ENSP00000433457 | ZBTB44     | 0.2132 |
| ENSP00000411004 | XG         | 0.2132 |
| ENSP00000320532 | WFDC9      | 0.2132 |
| ENSP00000406144 | TTC39A     | 0.2132 |
| ENSP00000358529 | TSPAN2     | 0.2132 |
| ENSP00000299413 | TRIM44     | 0.2132 |
| ENSP00000395538 | TNRC18     | 0.2132 |
| ENSP00000393161 | TMEM151B   | 0.2132 |
| ENSP00000454261 | TMEM114    | 0.2132 |
| ENSP00000307142 | TEX37      | 0.2132 |
| ENSP00000409016 | TBRG1      | 0.2132 |
| ENSP00000327509 | STAC2      | 0.2132 |
| ENSP00000337991 | SPTY2D1    | 0.2132 |
| ENSP00000311291 | SLCO2A1    | 0.2132 |
| ENSP00000320688 | SLC25A36   | 0.2132 |
| ENSP00000336801 | SLC25A26   | 0.2132 |
| ENSP00000358742 | SFR1       | 0.2132 |
| ENSP00000381081 | RNASE4     | 0.2132 |
| ENSP00000355969 | RD3        | 0.2132 |
| ENSP00000295927 | PTX3       | 0.2132 |
| ENSP00000365908 | PRUNE2     | 0.2132 |
| ENSP00000301015 | PIEZO1     | 0.2132 |
| ENSP00000204549 | PDCD7      | 0.2132 |
| ENSP00000381594 | PCDHGB7    | 0.2132 |
| ENSP00000239446 | PCDHB10    | 0.2132 |
| ENSP00000231484 | PCDH12     | 0.2132 |
| ENSP00000296358 | OTOP1      | 0.2132 |
| ENSP00000300179 | NYAP1      | 0.2132 |
| ENSP00000334872 | MT1F       | 0.2132 |
| ENSP00000432845 | MEX3A      | 0.2132 |

|                 |            |        |
|-----------------|------------|--------|
| ENSP00000314560 | MAP6D1     | 0.2132 |
| ENSP00000267838 | LYSMD2     | 0.2132 |
| ENSP00000361048 | LURAP1     | 0.2132 |
| ENSP00000333887 | KRTAP22-1  | 0.2132 |
| ENSP00000399475 | JMJD8      | 0.2132 |
| ENSP00000324570 | GYLTL1B    | 0.2132 |
| ENSP00000315106 | GPR137C    | 0.2132 |
| ENSP00000457904 | GOLGA8Q    | 0.2132 |
| ENSP00000388606 | GOLGA6L10  | 0.2132 |
| ENSP00000370439 | FLJ27365   | 0.2132 |
| ENSP00000381982 | FER1L6     | 0.2132 |
| ENSP00000342023 | FBXO38     | 0.2132 |
| ENSP00000379294 | FAM172A    | 0.2132 |
| ENSP00000462333 | ENGASE     | 0.2132 |
| ENSP00000271764 | EIF2D      | 0.2132 |
| ENSP00000435010 | DEFB134    | 0.2132 |
| ENSP00000326309 | DEFB124    | 0.2132 |
| ENSP00000335281 | DEFB105B   | 0.2132 |
| ENSP00000280083 | CTAGE5     | 0.2132 |
| ENSP00000331766 | CLECL1     | 0.2132 |
| ENSP00000329318 | CECR6      | 0.2132 |
| ENSP00000349773 | CDC42SE1   | 0.2132 |
| ENSP00000284481 | C8orf12    | 0.2132 |
| ENSP00000232519 | C3orf14    | 0.2132 |
| ENSP00000359115 | C20orf195  | 0.2132 |
| ENSP00000317905 | C17orf96   | 0.2132 |
| ENSP00000239125 | C10orf95   | 0.2132 |
| ENSP00000366477 | C10orf112  | 0.2132 |
| ENSP00000170150 | BPIFB2     | 0.2132 |
| ENSP00000358038 | BEND3      | 0.2132 |
| ENSP00000348799 | ATF7IP2    | 0.2132 |
| ENSP00000385741 | APOBEC3H   | 0.2132 |
| ENSP00000258888 | ALPK3      | 0.2132 |
| ENSP00000382091 | ALKBH5     | 0.2132 |
| ENSP00000451476 | AKAP2      | 0.2132 |
| ENSP00000469799 | AC091948.1 | 0.2132 |
| ENSP00000323348 | ZNF645     | 0.2105 |
| ENSP00000334685 | ZNF568     | 0.2105 |
| ENSP00000361602 | ZNF503     | 0.2105 |
| ENSP00000302770 | ZNF296     | 0.2105 |
| ENSP00000409318 | ZNF230     | 0.2105 |
| ENSP00000362435 | ZMYM6NB    | 0.2105 |
| ENSP00000216602 | ZFYVE21    | 0.2105 |
| ENSP00000378503 | ZBTB9      | 0.2105 |
| ENSP00000434142 | TPD52L1    | 0.2105 |
| ENSP00000338165 | TMEM39B    | 0.2105 |
| ENSP00000343507 | TMEM198    | 0.2105 |
| ENSP00000270560 | TM4SF5     | 0.2105 |
| ENSP00000295924 | TIPARP     | 0.2105 |
| ENSP00000462963 | TEFM       | 0.2105 |
| ENSP00000332359 | TCEAL2     | 0.2105 |
| ENSP00000335247 | STARD10    | 0.2105 |
| ENSP00000367494 | SPIRE2     | 0.2105 |

|                 |           |        |
|-----------------|-----------|--------|
| ENSP00000366390 | SPDYC     | 0.2105 |
| ENSP00000362574 | S100PBP   | 0.2105 |
| ENSP00000363270 | RUFY4     | 0.2105 |
| ENSP00000369320 | RS1       | 0.2105 |
| ENSP00000456566 | RNF151    | 0.2105 |
| ENSP00000355385 | R3HDM4    | 0.2105 |
| ENSP00000428325 | PYDC2     | 0.2105 |
| ENSP00000268281 | PRSS36    | 0.2105 |
| ENSP00000211413 | PRRT1     | 0.2105 |
| ENSP00000376848 | PRIMA1    | 0.2105 |
| ENSP00000345968 | PGLYRP2   | 0.2105 |
| ENSP00000287196 | PARP6     | 0.2105 |
| ENSP00000416829 | OARD1     | 0.2105 |
| ENSP00000439228 | MTRNR2L1  | 0.2105 |
| ENSP00000370761 | LYRM5     | 0.2105 |
| ENSP00000417330 | KRTAP5-7  | 0.2105 |
| ENSP00000335567 | KRTAP19-4 | 0.2105 |
| ENSP00000298622 | JAKMIP3   | 0.2105 |
| ENSP00000302724 | INSL5     | 0.2105 |
| ENSP00000291560 | HSF2BP    | 0.2105 |
| ENSP00000352606 | HAPLN3    | 0.2105 |
| ENSP00000338290 | GZF1      | 0.2105 |
| ENSP00000332900 | GPR97     | 0.2105 |
| ENSP00000421586 | GOLGA6L4  | 0.2105 |
| ENSP00000356389 | GINM1     | 0.2105 |
| ENSP00000341782 | GDAP1L1   | 0.2105 |
| ENSP00000298542 | FRMD7     | 0.2105 |
| ENSP00000259698 | FAM65B    | 0.2105 |
| ENSP00000254528 | EMILIN2   | 0.2105 |
| ENSP00000360190 | DEFB110   | 0.2105 |
| ENSP00000359571 | CXorf66   | 0.2105 |
| ENSP00000357900 | CUZD1     | 0.2105 |
| ENSP00000309772 | CPED1     | 0.2105 |
| ENSP00000325655 | CHCHD5    | 0.2105 |
| ENSP00000382508 | CDIP1     | 0.2105 |
| ENSP00000303158 | CCDC8     | 0.2105 |
| ENSP00000375087 | C8orf44   | 0.2105 |
| ENSP00000343242 | C7orf29   | 0.2105 |
| ENSP00000371205 | C2orf48   | 0.2105 |
| ENSP00000347712 | C2CD4A    | 0.2105 |
| ENSP00000288048 | C1orf158  | 0.2105 |
| ENSP00000316465 | C18orf56  | 0.2105 |
| ENSP00000376307 | C14orf80  | 0.2105 |
| ENSP00000367189 | C11orf83  | 0.2105 |
| ENSP00000368152 | ALKBH6    | 0.2105 |
| ENSP00000359489 | AFF2      | 0.2105 |
| ENSP00000340683 | ZNF823    | 0.2079 |
| ENSP00000316527 | ZNF609    | 0.2079 |
| ENSP00000295208 | ZNF514    | 0.2079 |
| ENSP00000337368 | ZNF224    | 0.2079 |
| ENSP00000361868 | ZMAT1     | 0.2079 |
| ENSP00000338807 | ZBTB49    | 0.2079 |
| ENSP00000297533 | TMUB1     | 0.2079 |

|                 |                |        |
|-----------------|----------------|--------|
| ENSP00000389039 | SYT14          | 0.2079 |
| ENSP00000421686 | SPDYE2         | 0.2079 |
| ENSP00000280191 | SPATA4         | 0.2079 |
| ENSP00000340982 | SPAG8          | 0.2079 |
| ENSP00000341963 | RSC1A1         | 0.2079 |
| ENSP00000184183 | ROPN1          | 0.2079 |
| ENSP00000223271 | RARRES2        | 0.2079 |
| ENSP00000257836 | PRRG4          | 0.2079 |
| ENSP00000280800 | PLBD2          | 0.2079 |
| ENSP00000306918 | PCDHGC4        | 0.2079 |
| ENSP00000304234 | PCDHA10        | 0.2079 |
| ENSP00000303822 | OR7G2          | 0.2079 |
| ENSP00000332068 | OR5P3          | 0.2079 |
| ENSP00000320077 | OR4D11         | 0.2079 |
| ENSP00000349930 | OR11G2         | 0.2079 |
| ENSP00000368920 | NHLRC3         | 0.2079 |
| ENSP00000372857 | NEK11          | 0.2079 |
| ENSP00000410910 | MUSTN1         | 0.2079 |
| ENSP00000303398 | MTBP           | 0.2079 |
| ENSP00000318352 | MRFAP1         | 0.2079 |
| ENSP00000381494 | KRTAP2-2       | 0.2079 |
| ENSP00000375108 | KRTAP19-1      | 0.2079 |
| ENSP00000440915 | KIAA0391       | 0.2079 |
| ENSP00000424151 | KCTD16         | 0.2079 |
| ENSP00000281772 | KANSL1L        | 0.2079 |
| ENSP00000271843 | JTB            | 0.2079 |
| ENSP00000296318 | IL17RD         | 0.2079 |
| ENSP00000335511 | HTR3E          | 0.2079 |
| ENSP00000386076 | GUCD1          | 0.2079 |
| ENSP00000274721 | GFRA3          | 0.2079 |
| ENSP00000221856 | FSD1           | 0.2079 |
| ENSP00000303508 | FRMD3          | 0.2079 |
| ENSP00000359935 | FPGT           | 0.2079 |
| ENSP00000344307 | FOCAD          | 0.2079 |
| ENSP00000332879 | FLRT2          | 0.2079 |
| ENSP00000342604 | FAM184A        | 0.2079 |
| ENSP00000391524 | DENND6B        | 0.2079 |
| ENSP00000355760 | DACT2          | 0.2079 |
| ENSP00000367746 | CLLU1          | 0.2079 |
| ENSP00000301407 | CGB1           | 0.2079 |
| ENSP00000301488 | CDK2AP2        | 0.2079 |
| ENSP00000329482 | CCSER1         | 0.2079 |
| ENSP00000304065 | C2orf27B       | 0.2079 |
| ENSP00000295297 | C1QTNF7        | 0.2079 |
| ENSP00000262498 | C16orf80       | 0.2079 |
| ENSP00000355022 | C16orf59       | 0.2079 |
| ENSP00000343686 | BTBD8          | 0.2079 |
| ENSP00000359682 | BRS3           | 0.2079 |
| ENSP00000454697 | BLOC1S5-TXNDC5 | 0.2079 |
| ENSP00000345773 | BEND7          | 0.2079 |
| ENSP00000246785 | BCL2L12        | 0.2079 |
| ENSP00000315383 | ASPRV1         | 0.2079 |
| ENSP00000348064 | ART3           | 0.2079 |

|                 |              |        |
|-----------------|--------------|--------|
| ENSP00000436682 | ARMS2        | 0.2079 |
| ENSP00000354569 | GNRHR2       | 0.2079 |
| ENSP00000466433 | LINC00493    | 0.2079 |
| ENSP00000444747 | ZNF835       | 0.2053 |
| ENSP00000345333 | ZNF69        | 0.2053 |
| ENSP00000270649 | ZNF614       | 0.2053 |
| ENSP00000337852 | ZNF576       | 0.2053 |
| ENSP00000333776 | ZNF479       | 0.2053 |
| ENSP00000378792 | ZNF169       | 0.2053 |
| ENSP00000318898 | ZNF114       | 0.2053 |
| ENSP00000232974 | ZBTB47       | 0.2053 |
| ENSP00000364677 | ZBTB12       | 0.2053 |
| ENSP00000414721 | WBP1L        | 0.2053 |
| ENSP00000216211 | UPK3A        | 0.2053 |
| ENSP00000316740 | TTC29        | 0.2053 |
| ENSP00000367227 | TMEM8B       | 0.2053 |
| ENSP00000369699 | TMEM27       | 0.2053 |
| ENSP00000390407 | TMEM213      | 0.2053 |
| ENSP00000315387 | TMEM102      | 0.2053 |
| ENSP00000378166 | TMCO6        | 0.2053 |
| ENSP00000288014 | THTPA        | 0.2053 |
| ENSP00000011473 | SYPL1        | 0.2053 |
| ENSP00000367794 | SRPX         | 0.2053 |
| ENSP00000359529 | SPANXN2      | 0.2053 |
| ENSP00000359221 | RWDD3        | 0.2053 |
| ENSP00000452844 | RP13-996F3.4 | 0.2053 |
| ENSP00000389709 | RNF212       | 0.2053 |
| ENSP00000333358 | RNASE10      | 0.2053 |
| ENSP00000256585 | REG4         | 0.2053 |
| ENSP00000409315 | RBM18        | 0.2053 |
| ENSP00000286380 | RAET1L       | 0.2053 |
| ENSP00000358120 | PLEKHO1      | 0.2053 |
| ENSP00000273371 | PLA1A        | 0.2053 |
| ENSP00000309515 | PHYHD1       | 0.2053 |
| ENSP00000352672 | PGLYRP4      | 0.2053 |
| ENSP00000231173 | PCDHB15      | 0.2053 |
| ENSP00000420840 | PCDHA1       | 0.2053 |
| ENSP00000261592 | NOL4         | 0.2053 |
| ENSP00000062104 | NNAT         | 0.2053 |
| ENSP00000246190 | NECAB3       | 0.2053 |
| ENSP00000345789 | MUM1         | 0.2053 |
| ENSP00000296468 | MFSD8        | 0.2053 |
| ENSP00000293745 | KRT72        | 0.2053 |
| ENSP00000438244 | KLRF2        | 0.2053 |
| ENSP00000320794 | KIAA2018     | 0.2053 |
| ENSP00000301659 | GSDMA        | 0.2053 |
| ENSP00000441032 | GRAMD1A      | 0.2053 |
| ENSP00000396441 | GPATCH4      | 0.2053 |
| ENSP00000353142 | GAL3ST4      | 0.2053 |
| ENSP00000322926 | FARP1        | 0.2053 |
| ENSP00000302578 | FAM84B       | 0.2053 |
| ENSP00000366901 | FAM216A      | 0.2053 |
| ENSP00000261844 | FAM214A      | 0.2053 |



|                 |                 |        |
|-----------------|-----------------|--------|
| ENSP00000354958 | FAM189B         | 0.2053 |
| ENSP00000368876 | FAM179A         | 0.2053 |
| ENSP00000293443 | FAM171A2        | 0.2053 |
| ENSP00000375268 | FAM127C         | 0.2053 |
| ENSP00000342805 | FAIM            | 0.2053 |
| ENSP00000409382 | EFCAB4B         | 0.2053 |
| ENSP00000364943 | DDAH2           | 0.2053 |
| ENSP00000301408 | CGB5            | 0.2053 |
| ENSP00000353717 | CCDC144A        | 0.2053 |
| ENSP00000260743 | CALHM2          | 0.2053 |
| ENSP00000329926 | CALHM1          | 0.2053 |
| ENSP00000302260 | C8orf46         | 0.2053 |
| ENSP00000340761 | BRI3BP          | 0.2053 |
| ENSP00000303486 | BAHCC1          | 0.2053 |
| ENSP00000327832 | ATAT1           | 0.2053 |
| ENSP00000245543 | ARMC7           | 0.2053 |
| ENSP00000353114 | AHNAK2          | 0.2053 |
| ENSP00000349496 | ADPRH           | 0.2053 |
| ENSP00000306241 | ENSG00000229450 | 0.2053 |
| ENSP00000302502 | ZSCAN32         | 0.2026 |
| ENSP00000373274 | ZNF860          | 0.2026 |
| ENSP00000454241 | ZNF747          | 0.2026 |
| ENSP00000333802 | ZNF599          | 0.2026 |
| ENSP00000310033 | ZNF596          | 0.2026 |
| ENSP00000393835 | ZNF506          | 0.2026 |
| ENSP00000244576 | ZNF391          | 0.2026 |
| ENSP00000338927 | ZNF385A         | 0.2026 |
| ENSP00000292928 | ZNF382          | 0.2026 |
| ENSP00000351042 | ZNF100          | 0.2026 |
| ENSP00000399664 | ZFP69B          | 0.2026 |
| ENSP00000219281 | USB1            | 0.2026 |
| ENSP00000359698 | UBTD1           | 0.2026 |
| ENSP00000269383 | TRIM65          | 0.2026 |
| ENSP00000343398 | TMPPE           | 0.2026 |
| ENSP00000260403 | TMEM62          | 0.2026 |
| ENSP00000341539 | TCAIM           | 0.2026 |
| ENSP00000418193 | SPRR2F          | 0.2026 |
| ENSP00000363001 | SMPDL3B         | 0.2026 |
| ENSP00000359521 | SLITRK2         | 0.2026 |
| ENSP00000361681 | SLC25A53        | 0.2026 |
| ENSP00000309751 | SLC16A13        | 0.2026 |
| ENSP00000269389 | SECTM1          | 0.2026 |
| ENSP00000272732 | SCRN3           | 0.2026 |
| ENSP00000358739 | RWDD2A          | 0.2026 |
| ENSP00000252655 | RSPH3           | 0.2026 |
| ENSP00000419786 | RGAG1           | 0.2026 |
| ENSP00000299638 | POLR2M          | 0.2026 |
| ENSP00000389913 | PLEKHM1         | 0.2026 |
| ENSP00000381636 | PCDHA11         | 0.2026 |
| ENSP00000416193 | P2RX6           | 0.2026 |
| ENSP00000225328 | P2RX5           | 0.2026 |
| ENSP00000262637 | OVOL3           | 0.2026 |
| ENSP00000298642 | OR4K2           | 0.2026 |

|                 |              |        |
|-----------------|--------------|--------|
| ENSP00000321338 | OR4C5        | 0.2026 |
| ENSP00000347767 | NEK5         | 0.2026 |
| ENSP00000380603 | NCKAP5       | 0.2026 |
| ENSP00000241527 | MTERFD2      | 0.2026 |
| ENSP00000314042 | MRGPRX4      | 0.2026 |
| ENSP00000357904 | LYSMD1       | 0.2026 |
| ENSP00000379951 | LEPREL2      | 0.2026 |
| ENSP00000344420 | KRTAP1-3     | 0.2026 |
| ENSP00000369438 | KRTAP10-10   | 0.2026 |
| ENSP00000251646 | KRT33B       | 0.2026 |
| ENSP00000455951 | KLRK1        | 0.2026 |
| ENSP00000336940 | KIAA1958     | 0.2026 |
| ENSP00000283303 | GPR115       | 0.2026 |
| ENSP00000290823 | GPR114       | 0.2026 |
| ENSP00000356737 | GORAB        | 0.2026 |
| ENSP00000428518 | GFRA2        | 0.2026 |
| ENSP00000356432 | FAM5C        | 0.2026 |
| ENSP00000363753 | FAM206A      | 0.2026 |
| ENSP00000280987 | FAM177A1     | 0.2026 |
| ENSP00000410768 | FAM135A      | 0.2026 |
| ENSP00000240364 | FAM117A      | 0.2026 |
| ENSP00000333380 | EGFL8        | 0.2026 |
| ENSP00000375416 | DKFZP666M039 | 0.2026 |
| ENSP00000371813 | DEFB132      | 0.2026 |
| ENSP00000359759 | CT45A5       | 0.2026 |
| ENSP00000306776 | CCDC110      | 0.2026 |
| ENSP00000312770 | C2orf69      | 0.2026 |
| ENSP00000376337 | BTBD6        | 0.2026 |
| ENSP00000228936 | ART4         | 0.2026 |
| ENSP00000347433 | APCDD1       | 0.2026 |
| ENSP00000222033 | ZNRF4        | 0.2000 |
| ENSP00000335091 | ZNRF1        | 0.2000 |
| ENSP00000329638 | ZNF804B      | 0.2000 |
| ENSP00000323945 | ZNF771       | 0.2000 |
| ENSP00000301042 | ZNF641       | 0.2000 |
| ENSP00000333223 | ZNF470       | 0.2000 |
| ENSP00000308578 | ZNF431       | 0.2000 |
| ENSP00000196489 | ZNF416       | 0.2000 |
| ENSP00000221722 | ZIM2         | 0.2000 |
| ENSP00000327427 | ZFP41        | 0.2000 |
| ENSP00000381109 | ZCWPW1       | 0.2000 |
| ENSP00000316794 | ZCCHC5       | 0.2000 |
| ENSP00000289407 | TSPAN33      | 0.2000 |
| ENSP00000254051 | TNS4         | 0.2000 |
| ENSP00000456881 | TMX2-CTNND1  | 0.2000 |
| ENSP00000162044 | TMEM161A     | 0.2000 |
| ENSP00000406482 | THSD7A       | 0.2000 |
| ENSP00000054650 | THAP3        | 0.2000 |
| ENSP00000261778 | TANGO6       | 0.2000 |
| ENSP00000381468 | SPINK13      | 0.2000 |
| ENSP00000366690 | SPATC1       | 0.2000 |
| ENSP00000383143 | SLITRK6      | 0.2000 |
| ENSP00000333638 | SLC52A2      | 0.2000 |

|                 |                 |        |
|-----------------|-----------------|--------|
| ENSP00000206544 | SLC22A17        | 0.2000 |
| ENSP00000414750 | SKOR2           | 0.2000 |
| ENSP00000440273 | SH2B2           | 0.2000 |
| ENSP00000272433 | SFXN5           | 0.2000 |
| ENSP00000355979 | SERTAD4         | 0.2000 |
| ENSP00000418693 | RWDD2B          | 0.2000 |
| ENSP00000298690 | RNASE7          | 0.2000 |
| ENSP00000344413 | PSG5            | 0.2000 |
| ENSP00000371307 | PPAPDC2         | 0.2000 |
| ENSP00000194152 | PCDHB4          | 0.2000 |
| ENSP00000330049 | OR4Q3           | 0.2000 |
| ENSP00000386167 | OR2A25          | 0.2000 |
| ENSP00000303862 | OR10A2          | 0.2000 |
| ENSP00000307549 | NPTX1           | 0.2000 |
| ENSP00000359340 | NKAIN4          | 0.2000 |
| ENSP00000337998 | NCKAP5L         | 0.2000 |
| ENSP00000267853 | MYZAP           | 0.2000 |
| ENSP00000356214 | MYCT1           | 0.2000 |
| ENSP00000337222 | MYADM           | 0.2000 |
| ENSP00000262102 | MTUS1           | 0.2000 |
| ENSP00000330587 | MT1H            | 0.2000 |
| ENSP00000016913 | MS4A12          | 0.2000 |
| ENSP00000352513 | MPZL1           | 0.2000 |
| ENSP00000260453 | MNS1            | 0.2000 |
| ENSP00000292524 | LRRC14          | 0.2000 |
| ENSP00000259006 | LIMD2           | 0.2000 |
| ENSP00000351047 | ICA1L           | 0.2000 |
| ENSP00000311502 | HEG1            | 0.2000 |
| ENSP00000058691 | HEBP2           | 0.2000 |
| ENSP00000297977 | HDX             | 0.2000 |
| ENSP00000308080 | GTF2IRD2B       | 0.2000 |
| ENSP00000014914 | GPRC5A          | 0.2000 |
| ENSP00000263733 | FAM20B          | 0.2000 |
| ENSP00000340474 | EXD3            | 0.2000 |
| ENSP00000472922 | DKFZP547L112    | 0.2000 |
| ENSP00000404151 | CEP170B         | 0.2000 |
| ENSP00000381553 | CCDC11          | 0.2000 |
| ENSP00000425786 | C4orf22         | 0.2000 |
| ENSP00000300006 | C16orf45        | 0.2000 |
| ENSP00000403987 | C15orf40        | 0.2000 |
| ENSP00000350314 | BCO2            | 0.2000 |
| ENSP00000286353 | ACPL2           | 0.2000 |
| ENSP00000448403 | ENSG00000257755 | 0.2000 |
| ENSP00000375593 | ZSCAN5A         | 0.1974 |
| ENSP00000385099 | ZNF792          | 0.1974 |
| ENSP00000461425 | ZNF66           | 0.1974 |
| ENSP00000344791 | ZNF600          | 0.1974 |
| ENSP00000332861 | ZNF530          | 0.1974 |
| ENSP00000379054 | ZNF488          | 0.1974 |
| ENSP00000303889 | ZNF30           | 0.1974 |
| ENSP00000288177 | ZNF19           | 0.1974 |
| ENSP00000366509 | ZKSCAN4         | 0.1974 |
| ENSP00000400836 | ZBTB8B          | 0.1974 |

|                 |           |        |
|-----------------|-----------|--------|
| ENSP00000249330 | VGF       | 0.1974 |
| ENSP00000354919 | VEPH1     | 0.1974 |
| ENSP00000240587 | TSHZ3     | 0.1974 |
| ENSP00000378050 | TRPT1     | 0.1974 |
| ENSP00000309532 | TP53I11   | 0.1974 |
| ENSP00000238936 | TMEM180   | 0.1974 |
| ENSP00000296595 | TMEM161B  | 0.1974 |
| ENSP00000357807 | THEM5     | 0.1974 |
| ENSP00000310796 | THAP2     | 0.1974 |
| ENSP00000375093 | TAS2R31   | 0.1974 |
| ENSP00000331532 | SPATA32   | 0.1974 |
| ENSP00000335292 | SLC51B    | 0.1974 |
| ENSP00000300650 | RNF214    | 0.1974 |
| ENSP00000330269 | RESP18    | 0.1974 |
| ENSP00000259351 | RALGPS1   | 0.1974 |
| ENSP00000369636 | PXDC1     | 0.1974 |
| ENSP00000246794 | PRRG2     | 0.1974 |
| ENSP00000265627 | PON3      | 0.1974 |
| ENSP00000358316 | PLEKHS1   | 0.1974 |
| ENSP00000239449 | PCDHB14   | 0.1974 |
| ENSP00000156084 | OTUD5     | 0.1974 |
| ENSP00000285600 | OR4K1     | 0.1974 |
| ENSP00000343062 | OR2T2     | 0.1974 |
| ENSP00000386138 | OR1C1     | 0.1974 |
| ENSP00000319071 | OR11H6    | 0.1974 |
| ENSP00000318997 | OR11H4    | 0.1974 |
| ENSP00000371994 | NYNRIN    | 0.1974 |
| ENSP00000374237 | NXPE2     | 0.1974 |
| ENSP00000369014 | NDNF      | 0.1974 |
| ENSP00000369849 | MEDAG     | 0.1974 |
| ENSP00000381150 | MBLAC1    | 0.1974 |
| ENSP00000414712 | MAP7      | 0.1974 |
| ENSP00000352163 | LYPD2     | 0.1974 |
| ENSP00000347649 | LEPREL4   | 0.1974 |
| ENSP00000335503 | KRTAP20-1 | 0.1974 |
| ENSP00000334834 | KRTAP13-4 | 0.1974 |
| ENSP00000330720 | KRTAP11-1 | 0.1974 |
| ENSP00000325525 | KIR3DL2   | 0.1974 |
| ENSP00000264257 | IL1RL2    | 0.1974 |
| ENSP00000253680 | HSH2D     | 0.1974 |
| ENSP00000248098 | HN1L      | 0.1974 |
| ENSP00000354313 | GRAMD4    | 0.1974 |
| ENSP00000399235 | FOLR3     | 0.1974 |
| ENSP00000347714 | FCAR      | 0.1974 |
| ENSP00000313159 | FBXO34    | 0.1974 |
| ENSP00000010299 | FAM76A    | 0.1974 |
| ENSP00000398617 | FAM71E2   | 0.1974 |
| ENSP00000376071 | FAM117B   | 0.1974 |
| ENSP00000368362 | FABP9     | 0.1974 |
| ENSP00000420976 | DLEU7     | 0.1974 |
| ENSP00000297866 | CXorf22   | 0.1974 |
| ENSP00000307741 | CMTM8     | 0.1974 |
| ENSP00000293845 | CCDC42    | 0.1974 |

|                 |            |        |
|-----------------|------------|--------|
| ENSP00000286688 | C8orf37    | 0.1974 |
| ENSP00000331720 | C16orf72   | 0.1974 |
| ENSP00000288757 | C12orf43   | 0.1974 |
| ENSP00000376799 | C11orf65   | 0.1974 |
| ENSP00000292566 | ALKBH4     | 0.1974 |
| ENSP00000361383 | AIF1L      | 0.1974 |
| ENSP00000472810 | AC090673.2 | 0.1974 |
| ENSP00000255746 | ZNF679     | 0.1947 |
| ENSP00000421915 | ZNF672     | 0.1947 |
| ENSP00000403975 | ZNF668     | 0.1947 |
| ENSP00000340004 | ZNF564     | 0.1947 |
| ENSP00000410734 | ZNF562     | 0.1947 |
| ENSP00000366384 | ZNF311     | 0.1947 |
| ENSP00000333725 | ZNF26      | 0.1947 |
| ENSP00000291182 | ZNF235     | 0.1947 |
| ENSP00000366273 | ZNF157     | 0.1947 |
| ENSP00000366899 | ZNF133     | 0.1947 |
| ENSP00000374592 | ZC3H12D    | 0.1947 |
| ENSP00000294664 | WDR63      | 0.1947 |
| ENSP00000320416 | VPS37D     | 0.1947 |
| ENSP00000331305 | TOB2       | 0.1947 |
| ENSP00000322300 | TMTC2      | 0.1947 |
| ENSP00000424040 | TAS2R50    | 0.1947 |
| ENSP00000334042 | TAC4       | 0.1947 |
| ENSP00000414920 | SPATA24    | 0.1947 |
| ENSP00000404438 | SOHLH1     | 0.1947 |
| ENSP00000336627 | SLITRK4    | 0.1947 |
| ENSP00000261187 | SLC16A7    | 0.1947 |
| ENSP00000351086 | RPS6KL1    | 0.1947 |
| ENSP00000373752 | RNF180     | 0.1947 |
| ENSP00000316628 | RNF152     | 0.1947 |
| ENSP00000313385 | RELL1      | 0.1947 |
| ENSP00000377502 | PHLDB2     | 0.1947 |
| ENSP00000438685 | PCDHB17    | 0.1947 |
| ENSP00000253807 | PCDHAC1    | 0.1947 |
| ENSP00000436042 | PCDHA9     | 0.1947 |
| ENSP00000364107 | PAGE2      | 0.1947 |
| ENSP00000303864 | OR8I2      | 0.1947 |
| ENSP00000333724 | OR6X1      | 0.1947 |
| ENSP00000368987 | OR6C75     | 0.1947 |
| ENSP00000308689 | OR10AD1    | 0.1947 |
| ENSP00000437563 | NKG2-E     | 0.1947 |
| ENSP00000377411 | NDUFA4L2   | 0.1947 |
| ENSP00000383392 | NCAM2      | 0.1947 |
| ENSP00000369146 | MT1M       | 0.1947 |
| ENSP00000379571 | MRGPRX3    | 0.1947 |
| ENSP00000349575 | MOB3A      | 0.1947 |
| ENSP00000276654 | LRP12      | 0.1947 |
| ENSP00000375429 | KRTAP3-2   | 0.1947 |
| ENSP00000366976 | KRTAP1-4   | 0.1947 |
| ENSP00000220244 | KIAA1199   | 0.1947 |
| ENSP00000355250 | KIAA0753   | 0.1947 |
| ENSP00000335196 | GLDN       | 0.1947 |

|                 |            |        |
|-----------------|------------|--------|
| ENSP00000398277 | GCNT6      | 0.1947 |
| ENSP00000276185 | FRMPD3     | 0.1947 |
| ENSP00000330432 | FAM83F     | 0.1947 |
| ENSP00000453973 | EPDR1      | 0.1947 |
| ENSP00000318264 | ELMOD3     | 0.1947 |
| ENSP00000327796 | DCAF4L1    | 0.1947 |
| ENSP00000304327 | COPRS      | 0.1947 |
| ENSP00000378577 | CLDN3      | 0.1947 |
| ENSP00000292779 | CCDC116    | 0.1947 |
| ENSP00000276704 | C8orf76    | 0.1947 |
| ENSP00000367359 | C6orf62    | 0.1947 |
| ENSP00000243189 | C1orf63    | 0.1947 |
| ENSP00000280756 | C12orf23   | 0.1947 |
| ENSP00000364643 | BPIFB3     | 0.1947 |
| ENSP00000310622 | APOBEC4    | 0.1947 |
| ENSP00000383520 | AL354822.1 | 0.1947 |
| ENSP00000380293 | ZNF99      | 0.1921 |
| ENSP00000378642 | ZNF785     | 0.1921 |
| ENSP00000394380 | ZNF625     | 0.1921 |
| ENSP00000301073 | ZNF524     | 0.1921 |
| ENSP00000319716 | ZNF101     | 0.1921 |
| ENSP00000272321 | WDPCP      | 0.1921 |
| ENSP00000233615 | WBP1       | 0.1921 |
| ENSP00000353998 | VKORC1L1   | 0.1921 |
| ENSP00000232496 | TUSC2      | 0.1921 |
| ENSP00000307640 | TTC36      | 0.1921 |
| ENSP00000418767 | TREML2     | 0.1921 |
| ENSP00000341677 | TPD52L3    | 0.1921 |
| ENSP00000368858 | TMEM14B    | 0.1921 |
| ENSP00000340088 | THEG       | 0.1921 |
| ENSP00000353542 | SPRR2D     | 0.1921 |
| ENSP00000429168 | SLC25A30   | 0.1921 |
| ENSP00000418707 | SLAIN1     | 0.1921 |
| ENSP00000314023 | SIDT2      | 0.1921 |
| ENSP00000446058 | SHD        | 0.1921 |
| ENSP00000245105 | SH3TC1     | 0.1921 |
| ENSP00000323191 | SAGE1      | 0.1921 |
| ENSP00000356272 | RMND1      | 0.1921 |
| ENSP00000344299 | PTAR1      | 0.1921 |
| ENSP00000254765 | POPDC3     | 0.1921 |
| ENSP00000222968 | PDAP1      | 0.1921 |
| ENSP00000231130 | PCDHB3     | 0.1921 |
| ENSP00000289269 | PCDHAC2    | 0.1921 |
| ENSP00000289272 | PCDHA13    | 0.1921 |
| ENSP00000281631 | PARP8      | 0.1921 |
| ENSP00000308595 | OR5R1      | 0.1921 |
| ENSP00000334393 | OR4F5      | 0.1921 |
| ENSP00000335575 | OR1J2      | 0.1921 |
| ENSP00000316782 | NBPF3      | 0.1921 |
| ENSP00000371553 | NANOGNB    | 0.1921 |
| ENSP00000305766 | MRGPRX1    | 0.1921 |
| ENSP00000300952 | MIDN       | 0.1921 |
| ENSP00000375479 | KRTAP10-2  | 0.1921 |

|                 |                 |        |
|-----------------|-----------------|--------|
| ENSP00000316681 | KIAA1731        | 0.1921 |
| ENSP00000315295 | KIAA1549L       | 0.1921 |
| ENSP00000318406 | KIAA0319L       | 0.1921 |
| ENSP00000259205 | IL36G           | 0.1921 |
| ENSP00000301917 | GPR25           | 0.1921 |
| ENSP00000320207 | GOLGA6L1        | 0.1921 |
| ENSP00000293981 | FLYWCH2         | 0.1921 |
| ENSP00000361345 | FAM78A          | 0.1921 |
| ENSP00000393667 | FAM126B         | 0.1921 |
| ENSP00000300714 | ENTHD2          | 0.1921 |
| ENSP00000262547 | DZANK1          | 0.1921 |
| ENSP00000248879 | DGCR6L          | 0.1921 |
| ENSP00000347810 | DEFB107B        | 0.1921 |
| ENSP00000363128 | DEC1            | 0.1921 |
| ENSP00000332449 | CRIP1           | 0.1921 |
| ENSP00000338838 | CHID1           | 0.1921 |
| ENSP00000359563 | CDR1            | 0.1921 |
| ENSP00000427108 | CDKN2AIP        | 0.1921 |
| ENSP00000333374 | CCDC60          | 0.1921 |
| ENSP00000374260 | CCDC149         | 0.1921 |
| ENSP00000222374 | CADM4           | 0.1921 |
| ENSP00000390153 | C6orf203        | 0.1921 |
| ENSP00000367564 | C19orf54        | 0.1921 |
| ENSP00000466104 | C17orf61-PLSCR3 | 0.1921 |
| ENSP00000285697 | C16orf87        | 0.1921 |
| ENSP00000354227 | C11orf80        | 0.1921 |
| ENSP00000349244 | C10orf137       | 0.1921 |
| ENSP00000309644 | BOD1            | 0.1921 |
| ENSP00000369518 | ATRAID          | 0.1921 |
| ENSP00000258417 | ARMC9           | 0.1921 |
| ENSP00000318770 | AQP11           | 0.1921 |
| ENSP00000383692 | APITD1-CORT     | 0.1921 |
| ENSP00000350509 | AIG1            | 0.1921 |
| ENSP00000352177 | ADAM29          | 0.1921 |
| ENSP00000432816 | ACRV1           | 0.1921 |
| ENSP00000470969 | AC004076.9      | 0.1921 |
| ENSP00000261880 | AAGAB           | 0.1921 |
| ENSP00000404074 | ZSCAN9          | 0.1895 |
| ENSP00000412999 | ZNF805          | 0.1895 |
| ENSP00000400997 | ZNF780A         | 0.1895 |
| ENSP00000320050 | ZNF580          | 0.1895 |
| ENSP00000327538 | ZNF534          | 0.1895 |
| ENSP00000329141 | ZNF37A          | 0.1895 |
| ENSP00000333775 | XAGE2           | 0.1895 |
| ENSP00000343871 | TMTC4           | 0.1895 |
| ENSP00000257663 | TMEM60          | 0.1895 |
| ENSP00000306564 | TMEM42          | 0.1895 |
| ENSP00000340477 | TMEM179         | 0.1895 |
| ENSP00000361138 | TMEM164         | 0.1895 |
| ENSP00000374274 | SSC5D           | 0.1895 |
| ENSP00000285013 | SLFN13          | 0.1895 |
| ENSP00000217254 | SLC52A3         | 0.1895 |
| ENSP00000312942 | SEZ6            | 0.1895 |

|                 |              |        |
|-----------------|--------------|--------|
| ENSP00000346892 | SERF1A       | 0.1895 |
| ENSP00000290216 | SCRN2        | 0.1895 |
| ENSP00000358902 | SAMD10       | 0.1895 |
| ENSP00000377942 | RSPRY1       | 0.1895 |
| ENSP00000457544 | RP11-77K12.7 | 0.1895 |
| ENSP00000454374 | RP11-468E2.2 | 0.1895 |
| ENSP00000358617 | PHTF1        | 0.1895 |
| ENSP00000231136 | PCDHB6       | 0.1895 |
| ENSP00000354293 | PCDHB16      | 0.1895 |
| ENSP00000434655 | PCDHA8       | 0.1895 |
| ENSP00000363873 | OXLD1        | 0.1895 |
| ENSP00000248073 | OR7C1        | 0.1895 |
| ENSP00000351466 | OR5AC2       | 0.1895 |
| ENSP00000312403 | OR2Y1        | 0.1895 |
| ENSP00000310773 | OR1L1        | 0.1895 |
| ENSP00000299481 | NLRP14       | 0.1895 |
| ENSP00000297142 | NEUROD6      | 0.1895 |
| ENSP00000262384 | N4BP1        | 0.1895 |
| ENSP00000304713 | MSANTD4      | 0.1895 |
| ENSP00000309521 | LIME1        | 0.1895 |
| ENSP00000444350 | LHFPL3       | 0.1895 |
| ENSP00000382590 | KRTAP5-4     | 0.1895 |
| ENSP00000381489 | KRTAP4-1     | 0.1895 |
| ENSP00000328017 | KRBA2        | 0.1895 |
| ENSP00000013222 | INMT         | 0.1895 |
| ENSP00000288098 | IL34         | 0.1895 |
| ENSP00000415823 | IGFL1        | 0.1895 |
| ENSP00000334805 | H1FNT        | 0.1895 |
| ENSP00000328070 | GLTPD2       | 0.1895 |
| ENSP00000329292 | GKN2         | 0.1895 |
| ENSP00000384593 | GAREML       | 0.1895 |
| ENSP00000344579 | FSCB         | 0.1895 |
| ENSP00000395848 | FAM90A26     | 0.1895 |
| ENSP00000420954 | FAM156B      | 0.1895 |
| ENSP00000353887 | FAM153A      | 0.1895 |
| ENSP00000304642 | FAM134B      | 0.1895 |
| ENSP00000397679 | ENDOU        | 0.1895 |
| ENSP00000378635 | DRP2         | 0.1895 |
| ENSP00000371644 | DEFB136      | 0.1895 |
| ENSP00000296955 | DCBLD1       | 0.1895 |
| ENSP00000228515 | CSRNP2       | 0.1895 |
| ENSP00000359310 | CSAG1        | 0.1895 |
| ENSP00000406327 | COX20        | 0.1895 |
| ENSP00000263655 | CNRIP1       | 0.1895 |
| ENSP00000295304 | CHAC2        | 0.1895 |
| ENSP00000379242 | CDRT1        | 0.1895 |
| ENSP00000311035 | CD200R1      | 0.1895 |
| ENSP00000320251 | C3orf17      | 0.1895 |
| ENSP00000295148 | C2orf44      | 0.1895 |
| ENSP00000309561 | C19orf70     | 0.1895 |
| ENSP00000269221 | C18orf8      | 0.1895 |
| ENSP00000377971 | ANKLE1       | 0.1895 |
| ENSP00000383639 | AC145212.1   | 0.1895 |



|                 |           |        |
|-----------------|-----------|--------|
| ENSP00000311181 | SNURFL    | 0.1895 |
| ENSP00000351530 | ZXDA      | 0.1868 |
| ENSP00000345339 | ZSCAN31   | 0.1868 |
| ENSP00000379689 | ZNF765    | 0.1868 |
| ENSP00000328245 | ZNF71     | 0.1868 |
| ENSP00000380840 | ZNF709    | 0.1868 |
| ENSP00000338770 | ZNF420    | 0.1868 |
| ENSP00000299237 | ZNF319    | 0.1868 |
| ENSP00000298585 | ZMYND19   | 0.1868 |
| ENSP00000384967 | VSTM2A    | 0.1868 |
| ENSP00000377381 | UBTD2     | 0.1868 |
| ENSP00000301272 | TMIGD2    | 0.1868 |
| ENSP00000303148 | TMEM37    | 0.1868 |
| ENSP00000323068 | TMEM168   | 0.1868 |
| ENSP00000353093 | TCEAL8    | 0.1868 |
| ENSP00000275200 | TAAR8     | 0.1868 |
| ENSP00000340703 | SPRR2B    | 0.1868 |
| ENSP00000351503 | SPATS2L   | 0.1868 |
| ENSP00000367965 | SOWAHA    | 0.1868 |
| ENSP00000379057 | SMCR7     | 0.1868 |
| ENSP00000406026 | SH2D5     | 0.1868 |
| ENSP00000461269 | SCIMP     | 0.1868 |
| ENSP00000334040 | RSBN1L    | 0.1868 |
| ENSP00000280606 | PRSS53    | 0.1868 |
| ENSP00000301039 | PROCA1    | 0.1868 |
| ENSP00000436426 | PCDHA7    | 0.1868 |
| ENSP00000328144 | OR7A17    | 0.1868 |
| ENSP00000369728 | OR52J3    | 0.1868 |
| ENSP00000313936 | OR2AE1    | 0.1868 |
| ENSP00000300182 | MS4A6E    | 0.1868 |
| ENSP00000452252 | MIA2      | 0.1868 |
| ENSP00000336817 | LUZP2     | 0.1868 |
| ENSP00000157600 | LMCD1     | 0.1868 |
| ENSP00000371606 | KRTAP5-1  | 0.1868 |
| ENSP00000381005 | KRTAP12-3 | 0.1868 |
| ENSP00000383225 | KRTAP10-4 | 0.1868 |
| ENSP00000355319 | KIAA1737  | 0.1868 |
| ENSP00000462172 | KIAA0040  | 0.1868 |
| ENSP00000278071 | ITPRIP    | 0.1868 |
| ENSP00000259213 | IL36B     | 0.1868 |
| ENSP00000223026 | HYAL4     | 0.1868 |
| ENSP00000436500 | GRAMD1B   | 0.1868 |
| ENSP00000362485 | GARNL3    | 0.1868 |
| ENSP00000348489 | FBRS      | 0.1868 |
| ENSP00000318182 | FAM156A   | 0.1868 |
| ENSP00000365759 | DDR1      | 0.1868 |
| ENSP00000309538 | DAPL1     | 0.1868 |
| ENSP00000349989 | CXorf24   | 0.1868 |
| ENSP00000399356 | CT62      | 0.1868 |
| ENSP00000263401 | COMMD9    | 0.1868 |
| ENSP00000216420 | CGRRF1    | 0.1868 |
| ENSP00000353706 | CDC42SE2  | 0.1868 |
| ENSP00000361392 | CCDC24    | 0.1868 |

|                 |             |        |
|-----------------|-------------|--------|
| ENSP00000329360 | CCDC137     | 0.1868 |
| ENSP00000404132 | C8orf59     | 0.1868 |
| ENSP00000416290 | C7orf25     | 0.1868 |
| ENSP00000389014 | C5orf42     | 0.1868 |
| ENSP00000386807 | C4orf48     | 0.1868 |
| ENSP00000352447 | C1orf116    | 0.1868 |
| ENSP00000242784 | C19orf43    | 0.1868 |
| ENSP00000286067 | C10orf12    | 0.1868 |
| ENSP00000313172 | BVES        | 0.1868 |
| ENSP00000375248 | BHLHA9      | 0.1868 |
| ENSP00000343674 | ASTL        | 0.1868 |
| ENSP00000471625 | AC003005.4  | 0.1868 |
| ENSP00000341179 | AC002472.13 | 0.1868 |
| ENSP00000359802 | ZNF75D      | 0.1842 |
| ENSP00000223459 | ZNF688      | 0.1842 |
| ENSP00000312141 | ZNF654      | 0.1842 |
| ENSP00000392410 | ZNF587B     | 0.1842 |
| ENSP00000331540 | ZNF570      | 0.1842 |
| ENSP00000375582 | ZNF552      | 0.1842 |
| ENSP00000365407 | ZNF549      | 0.1842 |
| ENSP00000350576 | ZNF441      | 0.1842 |
| ENSP00000327143 | ZNF354B     | 0.1842 |
| ENSP00000196482 | ZNF324      | 0.1842 |
| ENSP00000262085 | ZNF282      | 0.1842 |
| ENSP00000401947 | ZNF223      | 0.1842 |
| ENSP00000337081 | ZNF112      | 0.1842 |
| ENSP00000472867 | ZIK1        | 0.1842 |
| ENSP00000343348 | VMAC        | 0.1842 |
| ENSP00000396918 | URGCP       | 0.1842 |
| ENSP00000256367 | TTC9        | 0.1842 |
| ENSP00000338533 | TTC33       | 0.1842 |
| ENSP00000261177 | TSPAN11     | 0.1842 |
| ENSP00000438125 | TPCN1       | 0.1842 |
| ENSP00000275954 | TMEM47      | 0.1842 |
| ENSP00000303028 | TM4SF20     | 0.1842 |
| ENSP00000299290 | TBATA       | 0.1842 |
| ENSP00000332721 | TANGO2      | 0.1842 |
| ENSP00000344831 | SLC25A40    | 0.1842 |
| ENSP00000218197 | SLC25A14    | 0.1842 |
| ENSP00000392353 | PSMG4       | 0.1842 |
| ENSP00000297767 | PRSS37      | 0.1842 |
| ENSP00000357733 | PRR9        | 0.1842 |
| ENSP00000331845 | PRR14L      | 0.1842 |
| ENSP00000382485 | PROL1       | 0.1842 |
| ENSP00000310117 | PPP1R14B    | 0.1842 |
| ENSP00000319231 | PHLDA2      | 0.1842 |
| ENSP00000265260 | PCNP        | 0.1842 |
| ENSP00000239444 | PCDHB8      | 0.1842 |
| ENSP00000359600 | ODF2L       | 0.1842 |
| ENSP00000380251 | NUDT19      | 0.1842 |
| ENSP00000350874 | METTL9      | 0.1842 |
| ENSP00000362707 | MANBAL      | 0.1842 |
| ENSP00000254072 | KRTAP9-8    | 0.1842 |

|                 |               |        |
|-----------------|---------------|--------|
| ENSP00000383216 | KRTAP10-12    | 0.1842 |
| ENSP00000329165 | KRT36         | 0.1842 |
| ENSP00000375608 | KIR3DL1       | 0.1842 |
| ENSP00000302924 | IL17D         | 0.1842 |
| ENSP00000350387 | HYAL2         | 0.1842 |
| ENSP00000322617 | HTR3C         | 0.1842 |
| ENSP00000229633 | HINT3         | 0.1842 |
| ENSP00000351430 | GYPE          | 0.1842 |
| ENSP00000257626 | GSAP          | 0.1842 |
| ENSP00000324553 | GPR156        | 0.1842 |
| ENSP00000370057 | FRMPD4        | 0.1842 |
| ENSP00000357086 | FCRL6         | 0.1842 |
| ENSP00000353794 | FBXL22        | 0.1842 |
| ENSP00000400513 | FASTKD1       | 0.1842 |
| ENSP00000312017 | FAM57A        | 0.1842 |
| ENSP00000358170 | FAM204A       | 0.1842 |
| ENSP00000354891 | FAM163A       | 0.1842 |
| ENSP00000417970 | FAM120B       | 0.1842 |
| ENSP00000353650 | FABP12        | 0.1842 |
| ENSP00000406027 | EPM2AIP1      | 0.1842 |
| ENSP00000363694 | EPB41L4B      | 0.1842 |
| ENSP00000375259 | DKFZP667F0711 | 0.1842 |
| ENSP00000472467 | CXCL17        | 0.1842 |
| ENSP00000366178 | CST9L         | 0.1842 |
| ENSP00000357156 | CD5L          | 0.1842 |
| ENSP00000462883 | CCDC79        | 0.1842 |
| ENSP00000242819 | CCDC70        | 0.1842 |
| ENSP00000380941 | C21orf67      | 0.1842 |
| ENSP00000454926 | C16orf52      | 0.1842 |
| ENSP00000304676 | ATOH8         | 0.1842 |
| ENSP00000370227 | AREGB         | 0.1842 |
| ENSP00000329793 | ZNF85         | 0.1816 |
| ENSP00000341165 | ZNF772        | 0.1816 |
| ENSP00000320627 | ZNF7          | 0.1816 |
| ENSP00000300850 | ZNF646        | 0.1816 |
| ENSP00000242804 | ZNF442        | 0.1816 |
| ENSP00000240731 | ZNF211        | 0.1816 |
| ENSP00000471905 | ZNF17         | 0.1816 |
| ENSP00000297737 | ZMAT4         | 0.1816 |
| ENSP00000354543 | TSC22D2       | 0.1816 |
| ENSP00000368138 | TRIQQ         | 0.1816 |
| ENSP00000365844 | TRIM39        | 0.1816 |
| ENSP00000379030 | TRIM16L       | 0.1816 |
| ENSP00000407685 | TNXB          | 0.1816 |
| ENSP00000314116 | TMEM107       | 0.1816 |
| ENSP00000348132 | STK31         | 0.1816 |
| ENSP00000006658 | SPATA20       | 0.1816 |
| ENSP00000265909 | SNX19         | 0.1816 |
| ENSP00000342518 | SLC35F4       | 0.1816 |
| ENSP00000258403 | SLC19A3       | 0.1816 |
| ENSP00000415200 | SIGLEC5       | 0.1816 |
| ENSP00000423660 | SH3TC2        | 0.1816 |
| ENSP00000331258 | SGK196        | 0.1816 |

|                 |           |        |
|-----------------|-----------|--------|
| ENSP00000404860 | SCHIP1    | 0.1816 |
| ENSP00000383421 | RBM11     | 0.1816 |
| ENSP00000375717 | PTOV1     | 0.1816 |
| ENSP00000361338 | PPAPDC3   | 0.1816 |
| ENSP00000289672 | PKD1L1    | 0.1816 |
| ENSP00000317144 | PIBF1     | 0.1816 |
| ENSP00000290722 | PGLYRP3   | 0.1816 |
| ENSP00000322801 | OR52N2    | 0.1816 |
| ENSP00000350836 | OR2L13    | 0.1816 |
| ENSP00000386174 | OR2A12    | 0.1816 |
| ENSP00000291890 | NCR1      | 0.1816 |
| ENSP00000325808 | LRRN4CL   | 0.1816 |
| ENSP00000334696 | KRTAP19-7 | 0.1816 |
| ENSP00000340083 | KRCC1     | 0.1816 |
| ENSP00000387535 | IRGQ      | 0.1816 |
| ENSP00000324882 | IQUB      | 0.1816 |
| ENSP00000365529 | GPR158    | 0.1816 |
| ENSP00000318674 | FBXL16    | 0.1816 |
| ENSP00000463817 | FAM27E3   | 0.1816 |
| ENSP00000468308 | FAM20A    | 0.1816 |
| ENSP00000328347 | FAM110C   | 0.1816 |
| ENSP00000337146 | ENOX2     | 0.1816 |
| ENSP00000425048 | DTWD2     | 0.1816 |
| ENSP00000371825 | DEFB127   | 0.1816 |
| ENSP00000303550 | CYTL1     | 0.1816 |
| ENSP00000371234 | CYS1      | 0.1816 |
| ENSP00000358884 | CYB561D1  | 0.1816 |
| ENSP00000299665 | CLEC4D    | 0.1816 |
| ENSP00000250699 | CHRNA10   | 0.1816 |
| ENSP00000356386 | CFHR4     | 0.1816 |
| ENSP00000301200 | CDC42EP5  | 0.1816 |
| ENSP00000253079 | CCDC62    | 0.1816 |
| ENSP00000341368 | C6orf132  | 0.1816 |
| ENSP00000378441 | C6orf1    | 0.1816 |
| ENSP00000258457 | C2orf49   | 0.1816 |
| ENSP00000356912 | C1orf111  | 0.1816 |
| ENSP00000350704 | C1orf109  | 0.1816 |
| ENSP00000301419 | C19orf48  | 0.1816 |
| ENSP00000351937 | C17orf80  | 0.1816 |
| ENSP00000256969 | C12orf39  | 0.1816 |
| ENSP00000294244 | C11orf84  | 0.1816 |
| ENSP00000369372 | BEND2     | 0.1816 |
| ENSP00000470691 | ZSCAN5D   | 0.1789 |
| ENSP00000365443 | ZSCAN5C   | 0.1789 |
| ENSP00000287461 | ZNF689    | 0.1789 |
| ENSP00000351280 | ZNF429    | 0.1789 |
| ENSP00000331577 | ZNF397    | 0.1789 |
| ENSP00000370055 | UBL3      | 0.1789 |
| ENSP00000357842 | TUFT1     | 0.1789 |
| ENSP00000323645 | TTC39C    | 0.1789 |
| ENSP00000352284 | TMEM139   | 0.1789 |
| ENSP00000253435 | TEX101    | 0.1789 |
| ENSP00000283141 | SYCP2L    | 0.1789 |

|                 |               |        |
|-----------------|---------------|--------|
| ENSP00000206020 | SPAG7         | 0.1789 |
| ENSP00000420863 | SERINC5       | 0.1789 |
| ENSP00000439287 | RIMS4         | 0.1789 |
| ENSP00000350552 | RFX4          | 0.1789 |
| ENSP00000228811 | PRR4          | 0.1789 |
| ENSP00000342709 | PRR19         | 0.1789 |
| ENSP00000359198 | PPDPF         | 0.1789 |
| ENSP00000416673 | PATL2         | 0.1789 |
| ENSP00000284288 | PANX3         | 0.1789 |
| ENSP00000334441 | OR10J5        | 0.1789 |
| ENSP00000353988 | OR10A3        | 0.1789 |
| ENSP00000264596 | NEIL3         | 0.1789 |
| ENSP00000368688 | LYRM7         | 0.1789 |
| ENSP00000410926 | LMLN          | 0.1789 |
| ENSP00000340434 | LDOC1L        | 0.1789 |
| ENSP00000007735 | KRT33A        | 0.1789 |
| ENSP00000335388 | KIR3DX1       | 0.1789 |
| ENSP00000265272 | JAKMIP2       | 0.1789 |
| ENSP00000293756 | IP6K3         | 0.1789 |
| ENSP00000344860 | IGFL3         | 0.1789 |
| ENSP00000350848 | HMG5          | 0.1789 |
| ENSP00000349493 | GUCA2A        | 0.1789 |
| ENSP00000344446 | FGD6          | 0.1789 |
| ENSP00000237642 | FAM47E-STBD1  | 0.1789 |
| ENSP00000421364 | ECSCR         | 0.1789 |
| ENSP00000362629 | DMRTC1        | 0.1789 |
| ENSP00000367422 | DLEU1         | 0.1789 |
| ENSP00000268676 | DEF8          | 0.1789 |
| ENSP00000353128 | DCAF12L2      | 0.1789 |
| ENSP00000459439 | CTD-3148I10.1 | 0.1789 |
| ENSP00000362029 | CIZ1          | 0.1789 |
| ENSP00000423567 | CCDC153       | 0.1789 |
| ENSP00000357507 | C1orf43       | 0.1789 |
| ENSP00000327506 | C16orf54      | 0.1789 |
| ENSP00000302918 | C11orf40      | 0.1789 |
| ENSP00000344929 | BPIFB6        | 0.1789 |
| ENSP00000257336 | BIVM          | 0.1789 |
| ENSP00000219204 | ARL2BP        | 0.1789 |
| ENSP00000472703 | AL035252.1    | 0.1789 |
| ENSP00000367432 | AJAP1         | 0.1789 |
| ENSP00000471312 | AC011530.4    | 0.1789 |
| ENSP00000380174 | ZSCAN29       | 0.1763 |
| ENSP00000247930 | ZNF777        | 0.1763 |
| ENSP00000344095 | ZNF683        | 0.1763 |
| ENSP00000375660 | ZNF320        | 0.1763 |
| ENSP00000321049 | ZNF227        | 0.1763 |
| ENSP00000462054 | ZFP92         | 0.1763 |
| ENSP00000216268 | ZBED4         | 0.1763 |
| ENSP00000323087 | WSCD1         | 0.1763 |
| ENSP00000280190 | WDR17         | 0.1763 |
| ENSP00000368544 | VIT           | 0.1763 |
| ENSP00000316699 | TTC7A         | 0.1763 |
| ENSP00000373485 | TSNAXIP1      | 0.1763 |

|                 |            |        |
|-----------------|------------|--------|
| ENSP00000318409 | TMEM176B   | 0.1763 |
| ENSP00000296059 | TM4SF18    | 0.1763 |
| ENSP00000202625 | TGM6       | 0.1763 |
| ENSP00000300258 | TCP10L     | 0.1763 |
| ENSP00000258770 | TBRG4      | 0.1763 |
| ENSP00000312368 | SNX31      | 0.1763 |
| ENSP00000374125 | SIGLEC15   | 0.1763 |
| ENSP00000371040 | RLN2       | 0.1763 |
| ENSP00000307155 | RBMY1F     | 0.1763 |
| ENSP00000286070 | RBM45      | 0.1763 |
| ENSP00000258083 | PRADC1     | 0.1763 |
| ENSP00000311153 | PILRB      | 0.1763 |
| ENSP00000292140 | PHLDB3     | 0.1763 |
| ENSP00000334642 | PDZD8      | 0.1763 |
| ENSP00000263563 | PALD1      | 0.1763 |
| ENSP00000352671 | OSCAR      | 0.1763 |
| ENSP00000323853 | OR8K5      | 0.1763 |
| ENSP00000353516 | OR2W3      | 0.1763 |
| ENSP00000277216 | OR13C4     | 0.1763 |
| ENSP00000359464 | OGFRL1     | 0.1763 |
| ENSP00000279028 | OCSTAMP    | 0.1763 |
| ENSP00000378996 | NREP       | 0.1763 |
| ENSP00000345684 | NBPF10     | 0.1763 |
| ENSP00000333800 | MRGPRX2    | 0.1763 |
| ENSP00000338706 | MID1IP1    | 0.1763 |
| ENSP00000453042 | LY6K       | 0.1763 |
| ENSP00000329943 | LRRC36     | 0.1763 |
| ENSP00000352420 | LDLRAD4    | 0.1763 |
| ENSP00000375076 | KRTAP4-4   | 0.1763 |
| ENSP00000409964 | KIAA1430   | 0.1763 |
| ENSP00000324901 | IQCK       | 0.1763 |
| ENSP00000301284 | HDGFRP2    | 0.1763 |
| ENSP00000334540 | GPR141     | 0.1763 |
| ENSP00000351473 | GIMAP5     | 0.1763 |
| ENSP00000410007 | FBXO46     | 0.1763 |
| ENSP00000428646 | FBXO41     | 0.1763 |
| ENSP00000335040 | FAM129C    | 0.1763 |
| ENSP00000367229 | CEP68      | 0.1763 |
| ENSP00000377547 | CCNJL      | 0.1763 |
| ENSP00000238156 | CCDC92     | 0.1763 |
| ENSP00000414964 | CCDC107    | 0.1763 |
| ENSP00000404464 | CCBE1      | 0.1763 |
| ENSP00000324204 | C7orf41    | 0.1763 |
| ENSP00000230301 | C6orf118   | 0.1763 |
| ENSP00000304410 | C2orf68    | 0.1763 |
| ENSP00000333592 | C21orf90   | 0.1763 |
| ENSP00000287859 | C1orf27    | 0.1763 |
| ENSP00000382157 | C14orf182  | 0.1763 |
| ENSP00000473193 | AC087645.1 | 0.1763 |
| ENSP00000354305 | ZSCAN12    | 0.1737 |
| ENSP00000265827 | ZNF800     | 0.1737 |
| ENSP00000404127 | ZNF709     | 0.1737 |
| ENSP00000346729 | ZNF589     | 0.1737 |

|                 |               |        |
|-----------------|---------------|--------|
| ENSP00000243643 | ZNF415        | 0.1737 |
| ENSP00000255129 | ZNF334        | 0.1737 |
| ENSP00000418897 | ZNF322        | 0.1737 |
| ENSP00000429803 | ZNF260        | 0.1737 |
| ENSP00000435310 | WDR65         | 0.1737 |
| ENSP00000456594 | TMEM178B      | 0.1737 |
| ENSP00000456850 | THEGL         | 0.1737 |
| ENSP00000380762 | TEN1          | 0.1737 |
| ENSP00000457168 | SZT2          | 0.1737 |
| ENSP00000299140 | SPATA19       | 0.1737 |
| ENSP00000415998 | SLC48A1       | 0.1737 |
| ENSP00000360398 | SLC25A27      | 0.1737 |
| ENSP00000326924 | SCAPER        | 0.1737 |
| ENSP00000464100 | RP11-51F16.8  | 0.1737 |
| ENSP00000280258 | PRSS23        | 0.1737 |
| ENSP00000239666 | PDZD11        | 0.1737 |
| ENSP00000323805 | PALM2         | 0.1737 |
| ENSP00000325203 | OR6T1         | 0.1737 |
| ENSP00000331823 | OR5P2         | 0.1737 |
| ENSP00000369157 | OR10A4        | 0.1737 |
| ENSP00000331086 | ODF4          | 0.1737 |
| ENSP00000342156 | NCR3          | 0.1737 |
| ENSP00000418668 | MURC          | 0.1737 |
| ENSP00000457957 | MEF2BNB-MEF2B | 0.1737 |
| ENSP00000312273 | LGI4          | 0.1737 |
| ENSP00000222224 | LENG1         | 0.1737 |
| ENSP00000402297 | LACTBL1       | 0.1737 |
| ENSP00000304437 | KNDC1         | 0.1737 |
| ENSP00000197268 | KIAA1467      | 0.1737 |
| ENSP00000365172 | KDELC1        | 0.1737 |
| ENSP00000360822 | KCNT1         | 0.1737 |
| ENSP00000380467 | JMJD7         | 0.1737 |
| ENSP00000265239 | IQCG          | 0.1737 |
| ENSP00000270642 | IGLON5        | 0.1737 |
| ENSP00000417580 | IAH1          | 0.1737 |
| ENSP00000287474 | FRRS1         | 0.1737 |
| ENSP00000323034 | FAM83A        | 0.1737 |
| ENSP00000294829 | FAM71A        | 0.1737 |
| ENSP00000464743 | FAM215A       | 0.1737 |
| ENSP00000361254 | FAM213A       | 0.1737 |
| ENSP00000433343 | FAM118B       | 0.1737 |
| ENSP00000302105 | CRYGA         | 0.1737 |
| ENSP00000340568 | COX8C         | 0.1737 |
| ENSP00000334767 | CCDC84        | 0.1737 |
| ENSP00000239830 | CCDC77        | 0.1737 |
| ENSP00000269503 | CBLN2         | 0.1737 |
| ENSP00000412886 | CAMTA2        | 0.1737 |
| ENSP00000364219 | CAMK2N1       | 0.1737 |
| ENSP00000297145 | C7orf60       | 0.1737 |
| ENSP00000442411 | C21orf119     | 0.1737 |
| ENSP00000331691 | C12orf60      | 0.1737 |
| ENSP00000340667 | C11orf96      | 0.1737 |
| ENSP00000378409 | C10orf54      | 0.1737 |

|                 |           |        |
|-----------------|-----------|--------|
| ENSP00000411217 | CC2D2B    | 0.1737 |
| ENSP00000443399 | POM121L4P | 0.1737 |
| ENSP00000351883 | ZSCAN5B   | 0.1711 |
| ENSP00000329738 | ZSCAN30   | 0.1711 |
| ENSP00000350295 | ZNF816    | 0.1711 |
| ENSP00000459566 | ZNF75A    | 0.1711 |
| ENSP00000413411 | ZNF724P   | 0.1711 |
| ENSP00000409514 | ZNF717    | 0.1711 |
| ENSP00000367300 | ZNF425    | 0.1711 |
| ENSP00000388864 | ZNF419    | 0.1711 |
| ENSP00000300870 | ZNF267    | 0.1711 |
| ENSP00000334854 | ZACN      | 0.1711 |
| ENSP00000346466 | WDR91     | 0.1711 |
| ENSP00000328800 | WBP2NL    | 0.1711 |
| ENSP00000367952 | UCMA      | 0.1711 |
| ENSP00000279968 | TMEM218   | 0.1711 |
| ENSP00000376304 | TMEM121   | 0.1711 |
| ENSP00000345152 | TMEM120B  | 0.1711 |
| ENSP00000243286 | TCEAL3    | 0.1711 |
| ENSP00000316609 | SWI5      | 0.1711 |
| ENSP00000357737 | SPRR2G    | 0.1711 |
| ENSP00000357389 | SLC50A1   | 0.1711 |
| ENSP00000278426 | SLC43A1   | 0.1711 |
| ENSP00000376794 | SLC35G2   | 0.1711 |
| ENSP00000419249 | RIAD1     | 0.1711 |
| ENSP00000417451 | RBMXL3    | 0.1711 |
| ENSP00000272203 | PLEKHA6   | 0.1711 |
| ENSP00000393860 | PLEKHA2   | 0.1711 |
| ENSP00000395505 | PATE3     | 0.1711 |
| ENSP00000302867 | OR7G3     | 0.1711 |
| ENSP00000310788 | OR5J2     | 0.1711 |
| ENSP00000328215 | OR56A4    | 0.1711 |
| ENSP00000326232 | OR52D1    | 0.1711 |
| ENSP00000467123 | NLRP7     | 0.1711 |
| ENSP00000409370 | NLRP2     | 0.1711 |
| ENSP00000387380 | NECAB1    | 0.1711 |
| ENSP00000362170 | NAIF1     | 0.1711 |
| ENSP00000363418 | MFR1L     | 0.1711 |
| ENSP00000415222 | MS4A4E    | 0.1711 |
| ENSP00000458290 | METTL4    | 0.1711 |
| ENSP00000293274 | LYZL6     | 0.1711 |
| ENSP00000264094 | LOXL3     | 0.1711 |
| ENSP00000347635 | KRTAP13-1 | 0.1711 |
| ENSP00000344976 | IL1RAPL2  | 0.1711 |
| ENSP00000367130 | HES3      | 0.1711 |
| ENSP00000446872 | GATC      | 0.1711 |
| ENSP00000358510 | FUNDC2    | 0.1711 |
| ENSP00000239906 | FAM53C    | 0.1711 |
| ENSP00000317289 | FAM220A   | 0.1711 |
| ENSP00000320520 | FAM211B   | 0.1711 |
| ENSP00000429726 | FAM159A   | 0.1711 |
| ENSP00000316938 | DNASE1L2  | 0.1711 |
| ENSP00000319126 | DEFB112   | 0.1711 |



|                 |            |        |
|-----------------|------------|--------|
| ENSP00000356385 | CFHR2      | 0.1711 |
| ENSP00000315945 | CD163L1    | 0.1711 |
| ENSP00000262659 | CCM2L      | 0.1711 |
| ENSP00000344749 | CCDC37     | 0.1711 |
| ENSP00000354888 | CCDC152    | 0.1711 |
| ENSP00000296824 | CCDC127    | 0.1711 |
| ENSP00000378145 | CCDC109B   | 0.1711 |
| ENSP00000334289 | C9orf85    | 0.1711 |
| ENSP00000366402 | C9orf135   | 0.1711 |
| ENSP00000297001 | C7orf72    | 0.1711 |
| ENSP00000340887 | C5orf47    | 0.1711 |
| ENSP00000341139 | C3orf62    | 0.1711 |
| ENSP00000345107 | C2orf88    | 0.1711 |
| ENSP00000402389 | C1QTNF5    | 0.1711 |
| ENSP00000417061 | C1orf222   | 0.1711 |
| ENSP00000329920 | C19orf59   | 0.1711 |
| ENSP00000435352 | B3GNT6     | 0.1711 |
| ENSP00000416125 | ARHGEF38   | 0.1711 |
| ENSP00000274487 | ADAMTS19   | 0.1711 |
| ENSP00000387851 | AC104809.3 | 0.1711 |
| ENSP00000388519 | FAM74A1    | 0.1711 |
| ENSP00000340841 | ZNF621     | 0.1684 |
| ENSP00000303915 | ZNF561     | 0.1684 |
| ENSP00000353491 | ZNF460     | 0.1684 |
| ENSP00000309640 | XXYLT1     | 0.1684 |
| ENSP00000386141 | XKR9       | 0.1684 |
| ENSP00000218056 | WDR13      | 0.1684 |
| ENSP00000305069 | TMEM192    | 0.1684 |
| ENSP00000297205 | STEAP1     | 0.1684 |
| ENSP00000267260 | SRRM4      | 0.1684 |
| ENSP00000451542 | SOHLH2     | 0.1684 |
| ENSP00000433282 | SLC22A18AS | 0.1684 |
| ENSP00000306396 | RNF187     | 0.1684 |
| ENSP00000382492 | RADIL      | 0.1684 |
| ENSP00000302319 | PRY        | 0.1684 |
| ENSP00000336552 | PKIA       | 0.1684 |
| ENSP00000259883 | PGBD1      | 0.1684 |
| ENSP00000307234 | PCDHB1     | 0.1684 |
| ENSP00000322486 | OTOS       | 0.1684 |
| ENSP00000235532 | OSCP1      | 0.1684 |
| ENSP00000367649 | OR5D16     | 0.1684 |
| ENSP00000395369 | NBPF16     | 0.1684 |
| ENSP00000425864 | MEF2BNB    | 0.1684 |
| ENSP00000290536 | M1AP       | 0.1684 |
| ENSP00000364992 | LY6G6F     | 0.1684 |
| ENSP00000339374 | LGALS12    | 0.1684 |
| ENSP00000340546 | KRTAP4-5   | 0.1684 |
| ENSP00000295878 | KIAA1407   | 0.1684 |
| ENSP00000324191 | KCNRG      | 0.1684 |
| ENSP00000371054 | INSL6      | 0.1684 |
| ENSP00000381970 | GIN1       | 0.1684 |
| ENSP00000260447 | GCHFR      | 0.1684 |
| ENSP00000237172 | FILIP1     | 0.1684 |

|                 |           |        |
|-----------------|-----------|--------|
| ENSP00000356481 | FAM129A   | 0.1684 |
| ENSP00000313140 | EXD2      | 0.1684 |
| ENSP00000233712 | EVA1A     | 0.1684 |
| ENSP00000278505 | ENDOD1    | 0.1684 |
| ENSP00000302289 | EMB       | 0.1684 |
| ENSP00000372136 | DEFA1B    | 0.1684 |
| ENSP00000375783 | DACT3     | 0.1684 |
| ENSP00000368511 | CXorf58   | 0.1684 |
| ENSP00000359596 | CLCA2     | 0.1684 |
| ENSP00000356779 | CCDC181   | 0.1684 |
| ENSP00000432870 | CABYR     | 0.1684 |
| ENSP00000351422 | C19orf60  | 0.1684 |
| ENSP00000343493 | C17orf99  | 0.1684 |
| ENSP00000335229 | C17orf82  | 0.1684 |
| ENSP00000329106 | BPY2      | 0.1684 |
| ENSP00000371085 | BAIAP2L2  | 0.1684 |
| ENSP00000363416 | AUNIP     | 0.1684 |
| ENSP00000352976 | AMZ2      | 0.1684 |
| ENSP00000369238 | ADAM32    | 0.1684 |
| ENSP00000329303 | LOC619207 | 0.1684 |
| ENSP00000360583 | ZYG11A    | 0.1658 |
| ENSP00000398089 | ZNF821    | 0.1658 |
| ENSP00000321132 | ZNF554    | 0.1658 |
| ENSP00000353652 | ZNF528    | 0.1658 |
| ENSP00000379368 | ZNF35     | 0.1658 |
| ENSP00000250076 | ZNF232    | 0.1658 |
| ENSP00000361646 | ZMYND12   | 0.1658 |
| ENSP00000321309 | VCX2      | 0.1658 |
| ENSP00000230256 | UNC93A    | 0.1658 |
| ENSP00000352265 | TPGS1     | 0.1658 |
| ENSP00000316940 | TMEM31    | 0.1658 |
| ENSP00000375053 | TMEM203   | 0.1658 |
| ENSP00000342148 | TMEM167B  | 0.1658 |
| ENSP00000211314 | TMEM14A   | 0.1658 |
| ENSP00000275560 | SRCRB4D   | 0.1658 |
| ENSP00000299272 | SPIC      | 0.1658 |
| ENSP00000361597 | SPATA25   | 0.1658 |
| ENSP00000295213 | SPATA18   | 0.1658 |
| ENSP00000449500 | RNASEK    | 0.1658 |
| ENSP00000368869 | PRR16     | 0.1658 |
| ENSP00000306900 | PRND      | 0.1658 |
| ENSP00000318075 | PLEKHJ1   | 0.1658 |
| ENSP00000352173 | PLAC1     | 0.1658 |
| ENSP00000469886 | PINLYP    | 0.1658 |
| ENSP00000269919 | PGPEP1    | 0.1658 |
| ENSP00000309230 | PEAK1     | 0.1658 |
| ENSP00000345491 | PCDHB13   | 0.1658 |
| ENSP00000308764 | OR52I2    | 0.1658 |
| ENSP00000324557 | OR2M7     | 0.1658 |
| ENSP00000355432 | OR2M5     | 0.1658 |
| ENSP00000352710 | OR2M2     | 0.1658 |
| ENSP00000353044 | OR2L3     | 0.1658 |
| ENSP00000359384 | OOEP      | 0.1658 |

|                 |              |        |
|-----------------|--------------|--------|
| ENSP00000331857 | NLRP9        | 0.1658 |
| ENSP00000342137 | NCCRP1       | 0.1658 |
| ENSP00000300184 | MS4A7        | 0.1658 |
| ENSP00000350833 | MPPED2       | 0.1658 |
| ENSP00000364985 | LY6G6D       | 0.1658 |
| ENSP00000378733 | LBH          | 0.1658 |
| ENSP00000372286 | KRTAP27-1    | 0.1658 |
| ENSP00000376213 | KIAA1683     | 0.1658 |
| ENSP00000452581 | IFRG15       | 0.1658 |
| ENSP00000421917 | HMGXB3       | 0.1658 |
| ENSP00000297468 | GPR146       | 0.1658 |
| ENSP00000238667 | FLVCR2       | 0.1658 |
| ENSP00000326652 | FAM71F1      | 0.1658 |
| ENSP00000286692 | DRAM2        | 0.1658 |
| ENSP00000361795 | DBNDD2       | 0.1658 |
| ENSP00000284617 | CCSAP        | 0.1658 |
| ENSP00000343290 | C9orf171     | 0.1658 |
| ENSP00000340864 | C1QTNF1      | 0.1658 |
| ENSP00000356700 | C1orf105     | 0.1658 |
| ENSP00000299088 | C14orf93     | 0.1658 |
| ENSP00000366317 | C10orf114    | 0.1658 |
| ENSP00000332389 | BRICD5       | 0.1658 |
| ENSP00000403910 | ATP5SL       | 0.1658 |
| ENSP00000386485 | APOPT1       | 0.1658 |
| ENSP00000442163 | AL590867.1   | 0.1658 |
| ENSP00000324196 | AATK         | 0.1658 |
| ENSP00000331465 | ZNF84        | 0.1632 |
| ENSP00000317125 | ZNF726       | 0.1632 |
| ENSP00000301310 | ZNF582       | 0.1632 |
| ENSP00000400878 | ZNF234       | 0.1632 |
| ENSP00000306351 | ZNF182       | 0.1632 |
| ENSP00000415070 | ZNF177       | 0.1632 |
| ENSP00000263849 | ZC2HC1A      | 0.1632 |
| ENSP00000364739 | XAGE1C       | 0.1632 |
| ENSP00000296679 | WDR41        | 0.1632 |
| ENSP00000334148 | WDR25        | 0.1632 |
| ENSP00000319486 | TSPAN16      | 0.1632 |
| ENSP00000356211 | TMEM183A     | 0.1632 |
| ENSP00000327234 | TMCO5A       | 0.1632 |
| ENSP00000240691 | TAS2R9       | 0.1632 |
| ENSP00000448219 | TAS2R38      | 0.1632 |
| ENSP00000388731 | SSFA2        | 0.1632 |
| ENSP00000351884 | SPANXC       | 0.1632 |
| ENSP00000428541 | SMIM12       | 0.1632 |
| ENSP00000387617 | SMCO2        | 0.1632 |
| ENSP00000428612 | SLC10A5      | 0.1632 |
| ENSP00000372449 | RP11-408E5.4 | 0.1632 |
| ENSP00000262765 | QRICH2       | 0.1632 |
| ENSP00000358714 | PRSS35       | 0.1632 |
| ENSP00000223864 | PLGRKT       | 0.1632 |
| ENSP00000363654 | PALM2-AKAP2  | 0.1632 |
| ENSP00000355374 | OSGIN1       | 0.1632 |
| ENSP00000345563 | OR7D2        | 0.1632 |

|                 |           |        |
|-----------------|-----------|--------|
| ENSP00000326259 | OR52H1    | 0.1632 |
| ENSP00000365451 | OR4D1     | 0.1632 |
| ENSP00000333680 | NFAM1     | 0.1632 |
| ENSP00000325402 | MYPOP     | 0.1632 |
| ENSP00000200691 | MT3       | 0.1632 |
| ENSP00000340519 | LRRC37B   | 0.1632 |
| ENSP00000361036 | LHFPL1    | 0.1632 |
| ENSP00000356121 | LEMD1     | 0.1632 |
| ENSP00000411070 | LCE6A     | 0.1632 |
| ENSP00000420723 | KRTAP5-8  | 0.1632 |
| ENSP00000398619 | KRTAP25-1 | 0.1632 |
| ENSP00000372276 | KRTAP20-3 | 0.1632 |
| ENSP00000372272 | KRTAP19-8 | 0.1632 |
| ENSP00000251343 | KHNYN     | 0.1632 |
| ENSP00000310729 | HERPUD2   | 0.1632 |
| ENSP00000369943 | GCOM1     | 0.1632 |
| ENSP00000373565 | FAM83H    | 0.1632 |
| ENSP00000339207 | FAM122B   | 0.1632 |
| ENSP00000358456 | F8A1      | 0.1632 |
| ENSP00000381086 | CXorf36   | 0.1632 |
| ENSP00000364348 | CCDC180   | 0.1632 |
| ENSP00000395995 | CCDC141   | 0.1632 |
| ENSP00000340776 | CCDC108   | 0.1632 |
| ENSP00000361025 | C9orf96   | 0.1632 |
| ENSP00000307129 | C8orf74   | 0.1632 |
| ENSP00000412215 | C4orf45   | 0.1632 |
| ENSP00000295079 | C2orf47   | 0.1632 |
| ENSP00000323199 | C18orf32  | 0.1632 |
| ENSP00000328640 | C11orf72  | 0.1632 |
| ENSP00000342197 | BTNL8     | 0.1632 |
| ENSP00000364632 | BPIFB4    | 0.1632 |
| ENSP00000360899 | BEND5     | 0.1632 |
| ENSP00000328083 | ARHGEF37  | 0.1632 |
| ENSP00000344577 | APOL3     | 0.1632 |
| ENSP00000315915 | ANXA2R    | 0.1632 |
| ENSP00000352248 | ANXA10    | 0.1632 |
| ENSP00000281471 | AMN1      | 0.1632 |
| ENSP00000410395 | C12orf52  | 0.1632 |
| ENSP00000309812 | ZNF80     | 0.1605 |
| ENSP00000386393 | ZNF630    | 0.1605 |
| ENSP00000301215 | ZNF526    | 0.1605 |
| ENSP00000397693 | ZNF28     | 0.1605 |
| ENSP00000375822 | ZNF222    | 0.1605 |
| ENSP00000342019 | ZNF189    | 0.1605 |
| ENSP00000420727 | ZNF181    | 0.1605 |
| ENSP00000221327 | ZNF180    | 0.1605 |
| ENSP00000269499 | ZCCHC2    | 0.1605 |
| ENSP00000361875 | WFDC5     | 0.1605 |
| ENSP00000431371 | VKORC1    | 0.1605 |
| ENSP00000414144 | TMEM236   | 0.1605 |
| ENSP00000372982 | TMEM200C  | 0.1605 |
| ENSP00000293261 | TMEM143   | 0.1605 |
| ENSP00000440509 | TIFAB     | 0.1605 |

|                 |            |        |
|-----------------|------------|--------|
| ENSP00000364482 | STK19      | 0.1605 |
| ENSP00000366081 | SSX4B      | 0.1605 |
| ENSP00000369611 | SPZ1       | 0.1605 |
| ENSP00000341442 | SNTN       | 0.1605 |
| ENSP00000366283 | SLITRK5    | 0.1605 |
| ENSP00000273905 | SLC10A6    | 0.1605 |
| ENSP00000410041 | SKIDA1     | 0.1605 |
| ENSP00000290894 | SHF        | 0.1605 |
| ENSP00000368502 | SCGB2B2    | 0.1605 |
| ENSP00000229903 | SAYSD1     | 0.1605 |
| ENSP00000356444 | SAMD5      | 0.1605 |
| ENSP00000283243 | PLA2R1     | 0.1605 |
| ENSP00000473005 | PIH1       | 0.1605 |
| ENSP00000341911 | PALM       | 0.1605 |
| ENSP00000364110 | PAGE2B     | 0.1605 |
| ENSP00000305640 | OR6F1      | 0.1605 |
| ENSP00000303096 | OR5A1      | 0.1605 |
| ENSP00000323224 | OR52N4     | 0.1605 |
| ENSP00000324369 | OR2T35     | 0.1605 |
| ENSP00000352904 | NT5C1B     | 0.1605 |
| ENSP00000375063 | NLRP5      | 0.1605 |
| ENSP00000391116 | NBPF12     | 0.1605 |
| ENSP00000300303 | NAT16      | 0.1605 |
| ENSP00000368468 | MCUR1      | 0.1605 |
| ENSP00000324175 | MAMSTR     | 0.1605 |
| ENSP00000375622 | LAIR1      | 0.1605 |
| ENSP00000339238 | KRTAP24-1  | 0.1605 |
| ENSP00000375237 | KRTAP2-3   | 0.1605 |
| ENSP00000372278 | KRTAP20-4  | 0.1605 |
| ENSP00000357840 | KIAA1919   | 0.1605 |
| ENSP00000307461 | KIAA1024   | 0.1605 |
| ENSP00000371927 | GPR78      | 0.1605 |
| ENSP00000415890 | GPR35      | 0.1605 |
| ENSP00000305107 | GIMAP8     | 0.1605 |
| ENSP00000158009 | FNDC8      | 0.1605 |
| ENSP00000346918 | DHRS4-AS1  | 0.1605 |
| ENSP00000322191 | DEFB104B   | 0.1605 |
| ENSP00000368245 | CXorf21    | 0.1605 |
| ENSP00000421736 | CRIL       | 0.1605 |
| ENSP00000402505 | CPAMD8     | 0.1605 |
| ENSP00000299295 | CHODL      | 0.1605 |
| ENSP00000315111 | C8orf42    | 0.1605 |
| ENSP00000420610 | C6orf201   | 0.1605 |
| ENSP00000406925 | C4orf26    | 0.1605 |
| ENSP00000418511 | C21orf62   | 0.1605 |
| ENSP00000360244 | C1orf87    | 0.1605 |
| ENSP00000360045 | C1orf141   | 0.1605 |
| ENSP00000386499 | C16orf11   | 0.1605 |
| ENSP00000443007 | C12orf36   | 0.1605 |
| ENSP00000253362 | BPIFA2     | 0.1605 |
| ENSP00000367360 | BLACE      | 0.1605 |
| ENSP00000266581 | AMIGO2     | 0.1605 |
| ENSP00000470580 | AC027228.1 | 0.1605 |

|                 |           |        |
|-----------------|-----------|--------|
| ENSP00000360245 | C10orf131 | 0.1605 |
| ENSP00000394086 | ZNF84     | 0.1579 |
| ENSP00000410890 | ZNF783    | 0.1579 |
| ENSP00000348673 | ZNF770    | 0.1579 |
| ENSP00000355251 | ZNF511    | 0.1579 |
| ENSP00000301547 | ZNF443    | 0.1579 |
| ENSP00000471077 | ZNF417    | 0.1579 |
| ENSP00000349882 | ZNF248    | 0.1579 |
| ENSP00000463741 | ZNF19     | 0.1579 |
| ENSP00000275766 | ZC3HAV1L  | 0.1579 |
| ENSP00000362560 | VSTM2L    | 0.1579 |
| ENSP00000404251 | VGLL4     | 0.1579 |
| ENSP00000416168 | TRANK1    | 0.1579 |
| ENSP00000292114 | TMEM199   | 0.1579 |
| ENSP00000296582 | TMEM184C  | 0.1579 |
| ENSP00000233047 | TMEM159   | 0.1579 |
| ENSP00000278826 | TMEM138   | 0.1579 |
| ENSP00000410852 | TMEM132C  | 0.1579 |
| ENSP00000389466 | TGM7      | 0.1579 |
| ENSP00000397002 | TEX22     | 0.1579 |
| ENSP00000278550 | TENM4     | 0.1579 |
| ENSP00000302077 | SLFN12    | 0.1579 |
| ENSP00000357116 | SAMD3     | 0.1579 |
| ENSP00000308820 | RIC3      | 0.1579 |
| ENSP00000300557 | PRR15L    | 0.1579 |
| ENSP00000472066 | PRED60    | 0.1579 |
| ENSP00000221462 | PPP1R37   | 0.1579 |
| ENSP00000338067 | PKIG      | 0.1579 |
| ENSP00000360054 | PHACTR3   | 0.1579 |
| ENSP00000364089 | PAGE3     | 0.1579 |
| ENSP00000364261 | OTUD3     | 0.1579 |
| ENSP00000323982 | OR8H2     | 0.1579 |
| ENSP00000318878 | OR4F21    | 0.1579 |
| ENSP00000321419 | OR4C3     | 0.1579 |
| ENSP00000324534 | OR14C36   | 0.1579 |
| ENSP00000251921 | NXPE1     | 0.1579 |
| ENSP00000253262 | NUTMF     | 0.1579 |
| ENSP00000279206 | NUDT22    | 0.1579 |
| ENSP00000334437 | NUDT17    | 0.1579 |
| ENSP00000363520 | NIPAL3    | 0.1579 |
| ENSP00000325978 | LRRC31    | 0.1579 |
| ENSP00000275635 | LAT2      | 0.1579 |
| ENSP00000328270 | KRTAP4-6  | 0.1579 |
| ENSP00000375151 | KRTAP4-3  | 0.1579 |
| ENSP00000366923 | IGFBPL1   | 0.1579 |
| ENSP00000372059 | IFITM5    | 0.1579 |
| ENSP00000349364 | IFFO1     | 0.1579 |
| ENSP00000299633 | HDGFRP3   | 0.1579 |
| ENSP00000230012 | HDGFL1    | 0.1579 |
| ENSP00000258456 | GPR45     | 0.1579 |
| ENSP00000345060 | GPR179    | 0.1579 |
| ENSP00000452571 | GATSL2    | 0.1579 |
| ENSP00000362570 | FNDC5     | 0.1579 |

|                 |              |        |
|-----------------|--------------|--------|
| ENSP00000270620 | FAM71E1      | 0.1579 |
| ENSP00000341565 | FAM111B      | 0.1579 |
| ENSP00000369371 | EQTN         | 0.1579 |
| ENSP00000359396 | DPPA5        | 0.1579 |
| ENSP00000316193 | DNASE1L3     | 0.1579 |
| ENSP00000325954 | CDHR3        | 0.1579 |
| ENSP00000379566 | CCHCR1       | 0.1579 |
| ENSP00000295171 | CCDC74A      | 0.1579 |
| ENSP00000347586 | CCDC69       | 0.1579 |
| ENSP00000359299 | CCDC18       | 0.1579 |
| ENSP00000341684 | CCDC15       | 0.1579 |
| ENSP00000295124 | CCDC138      | 0.1579 |
| ENSP00000350856 | C8orf86      | 0.1579 |
| ENSP00000386139 | C5orf55      | 0.1579 |
| ENSP00000266542 | C1RL         | 0.1579 |
| ENSP00000298699 | C12orf50     | 0.1579 |
| ENSP00000227349 | C11orf63     | 0.1579 |
| ENSP00000367528 | AARD         | 0.1579 |
| ENSP00000375229 | DEFB117      | 0.1579 |
| ENSP00000468862 | ZNF714       | 0.1553 |
| ENSP00000364645 | ZNF484       | 0.1553 |
| ENSP00000281523 | ZNF385D      | 0.1553 |
| ENSP00000467018 | ZNF223       | 0.1553 |
| ENSP00000340590 | ZCCHC16      | 0.1553 |
| ENSP00000361755 | WFDC6        | 0.1553 |
| ENSP00000370420 | VCX3B        | 0.1553 |
| ENSP00000222275 | UPK1A        | 0.1553 |
| ENSP00000273610 | UCN2         | 0.1553 |
| ENSP00000401477 | TMEM232      | 0.1553 |
| ENSP00000394178 | TMEM182      | 0.1553 |
| ENSP00000316532 | TMEM132E     | 0.1553 |
| ENSP00000272643 | THSD7B       | 0.1553 |
| ENSP00000436450 | TAS2R46      | 0.1553 |
| ENSP00000375091 | TAS2R19      | 0.1553 |
| ENSP00000331474 | SYNDIG1L     | 0.1553 |
| ENSP00000298596 | STOX1        | 0.1553 |
| ENSP00000329565 | SPDYE3       | 0.1553 |
| ENSP00000417063 | SPATA6L      | 0.1553 |
| ENSP00000318900 | SOBP         | 0.1553 |
| ENSP00000296444 | SHISA5       | 0.1553 |
| ENSP00000417556 | RP11-101E3.5 | 0.1553 |
| ENSP00000383093 | RFPL3S       | 0.1553 |
| ENSP00000250831 | RBMY1J       | 0.1553 |
| ENSP00000372484 | RBMY1B       | 0.1553 |
| ENSP00000305005 | PSG8         | 0.1553 |
| ENSP00000258229 | PCNXL2       | 0.1553 |
| ENSP00000278360 | PAMR1        | 0.1553 |
| ENSP00000326708 | OVCH1        | 0.1553 |
| ENSP00000342356 | OSTN         | 0.1553 |
| ENSP00000444134 | OR7G1        | 0.1553 |
| ENSP00000324111 | OR5AS1       | 0.1553 |
| ENSP00000344040 | OR2S2        | 0.1553 |
| ENSP00000386222 | OR2F2        | 0.1553 |

|                 |              |        |
|-----------------|--------------|--------|
| ENSP00000361397 | NUTMG        | 0.1553 |
| ENSP00000394623 | NUTM2B       | 0.1553 |
| ENSP00000409898 | NLRP11       | 0.1553 |
| ENSP00000385903 | NAA60        | 0.1553 |
| ENSP00000219162 | MT4          | 0.1553 |
| ENSP00000245564 | MSTO1        | 0.1553 |
| ENSP00000321455 | MICU3        | 0.1553 |
| ENSP00000252229 | MICB         | 0.1553 |
| ENSP00000379201 | METTTL21D    | 0.1553 |
| ENSP00000386049 | MBD5         | 0.1553 |
| ENSP00000219168 | LYRM1        | 0.1553 |
| ENSP00000321026 | LURAP1L      | 0.1553 |
| ENSP00000274382 | LIX1         | 0.1553 |
| ENSP00000334560 | KRTAP6-2     | 0.1553 |
| ENSP00000264651 | KRT24        | 0.1553 |
| ENSP00000291860 | KIR3DL3      | 0.1553 |
| ENSP00000259211 | IL36A        | 0.1553 |
| ENSP00000361569 | IER5L        | 0.1553 |
| ENSP00000348316 | HN1          | 0.1553 |
| ENSP00000394954 | GSG1L        | 0.1553 |
| ENSP00000261530 | GPATCH2L     | 0.1553 |
| ENSP00000380488 | GALNT9       | 0.1553 |
| ENSP00000280236 | FSIP1        | 0.1553 |
| ENSP00000321386 | FBXO39       | 0.1553 |
| ENSP00000297532 | FASTK        | 0.1553 |
| ENSP00000328307 | FAM47B       | 0.1553 |
| ENSP00000332148 | DZIP1L       | 0.1553 |
| ENSP00000383115 | COLEC12      | 0.1553 |
| ENSP00000402355 | CDRT15       | 0.1553 |
| ENSP00000373827 | CCDC150      | 0.1553 |
| ENSP00000283233 | CCDC148      | 0.1553 |
| ENSP00000331625 | C3orf35      | 0.1553 |
| ENSP00000396192 | C1QTNF9B-AS1 | 0.1553 |
| ENSP00000453969 | C15orf52     | 0.1553 |
| ENSP00000341610 | C15orf48     | 0.1553 |
| ENSP00000300399 | BPIFC        | 0.1553 |
| ENSP00000364603 | BPIFA3       | 0.1553 |
| ENSP00000376417 | ARMC2        | 0.1553 |
| ENSP00000274979 | ANO7         | 0.1553 |
| ENSP00000321627 | ANKFN1       | 0.1553 |
| ENSP00000177648 | ALPK1        | 0.1553 |
| ENSP00000364567 | ADPRHL1      | 0.1553 |
| ENSP00000350540 | GYG2P1       | 0.1553 |
| ENSP00000410466 | ZNF90        | 0.1526 |
| ENSP00000339314 | ZNF70        | 0.1526 |
| ENSP00000321848 | ZNF671       | 0.1526 |
| ENSP00000379451 | ZNF418       | 0.1526 |
| ENSP00000397178 | ZNF300       | 0.1526 |
| ENSP00000402644 | TRIM16       | 0.1526 |
| ENSP00000322097 | TPRXL        | 0.1526 |
| ENSP00000004103 | TMEM176A     | 0.1526 |
| ENSP00000313408 | TMC6         | 0.1526 |
| ENSP00000292090 | TLCD1        | 0.1526 |



|                 |              |        |
|-----------------|--------------|--------|
| ENSP00000365200 | TEX30        | 0.1526 |
| ENSP00000375095 | TAS2R13      | 0.1526 |
| ENSP00000386439 | SYNC         | 0.1526 |
| ENSP00000308727 | SUSD5        | 0.1526 |
| ENSP00000248933 | SEZ6L        | 0.1526 |
| ENSP00000453854 | SECISBP2L    | 0.1526 |
| ENSP00000432487 | SAAL1        | 0.1526 |
| ENSP00000305151 | PWWP2A       | 0.1526 |
| ENSP00000244296 | PSG1         | 0.1526 |
| ENSP00000394510 | PRR12        | 0.1526 |
| ENSP00000332123 | PROSAPIP1    | 0.1526 |
| ENSP00000355260 | PPP1R14C     | 0.1526 |
| ENSP00000304188 | OR8U1        | 0.1526 |
| ENSP00000248072 | OR7C2        | 0.1526 |
| ENSP00000384563 | OR6B2        | 0.1526 |
| ENSP00000386151 | OR6B1        | 0.1526 |
| ENSP00000305011 | OR4K14       | 0.1526 |
| ENSP00000355429 | OR2T5        | 0.1526 |
| ENSP00000355431 | OR2T4        | 0.1526 |
| ENSP00000283225 | OR14K1       | 0.1526 |
| ENSP00000361104 | OBP2B        | 0.1526 |
| ENSP00000368389 | NGRN         | 0.1526 |
| ENSP00000382856 | MTRNR2L4     | 0.1526 |
| ENSP00000288087 | MDP1         | 0.1526 |
| ENSP00000366418 | LZIC         | 0.1526 |
| ENSP00000364978 | LY6G6C       | 0.1526 |
| ENSP00000352601 | LRP10        | 0.1526 |
| ENSP00000357736 | LELP1        | 0.1526 |
| ENSP00000345797 | KRBOX4       | 0.1526 |
| ENSP00000350881 | GRAMD1C      | 0.1526 |
| ENSP00000391465 | GAGE12I      | 0.1526 |
| ENSP00000264703 | FNDC4        | 0.1526 |
| ENSP00000331397 | FAM43B       | 0.1526 |
| ENSP00000378710 | FAM135B      | 0.1526 |
| ENSP00000364324 | FAM120C      | 0.1526 |
| ENSP00000464167 | CTD-2510F5.6 | 0.1526 |
| ENSP00000352295 | CGB2         | 0.1526 |
| ENSP00000365465 | CDSN         | 0.1526 |
| ENSP00000381272 | CD200R1L     | 0.1526 |
| ENSP00000256652 | CD101        | 0.1526 |
| ENSP00000373304 | CCDC174      | 0.1526 |
| ENSP00000343087 | CCDC157      | 0.1526 |
| ENSP00000407763 | CCDC122      | 0.1526 |
| ENSP00000252939 | CALY         | 0.1526 |
| ENSP00000414893 | C9orf53      | 0.1526 |
| ENSP00000427820 | C8orf34      | 0.1526 |
| ENSP00000330596 | C22orf29     | 0.1526 |
| ENSP00000299191 | C16orf78     | 0.1526 |
| ENSP00000301031 | C16orf55     | 0.1526 |
| ENSP00000433721 | C11orf54     | 0.1526 |
| ENSP00000314914 | AMER3        | 0.1526 |
| ENSP00000256412 | ADAMDEC1     | 0.1526 |
| ENSP00000366511 | AC025278.1   | 0.1526 |

|                 |               |        |
|-----------------|---------------|--------|
| ENSP00000425679 | SNX29P2       | 0.1526 |
| ENSP00000390179 | ZNF527        | 0.1500 |
| ENSP00000388421 | ZNF487        | 0.1500 |
| ENSP00000381304 | ZFP90         | 0.1500 |
| ENSP00000362047 | XKRX          | 0.1500 |
| ENSP00000310303 | TOPAZ1        | 0.1500 |
| ENSP00000319009 | TMEM45A       | 0.1500 |
| ENSP00000303987 | TMEM223       | 0.1500 |
| ENSP00000438863 | TMEM206       | 0.1500 |
| ENSP00000296776 | TMEM174       | 0.1500 |
| ENSP00000400500 | THAP5         | 0.1500 |
| ENSP00000371243 | TEX33         | 0.1500 |
| ENSP00000357796 | TCHHL1        | 0.1500 |
| ENSP00000311257 | STOX2         | 0.1500 |
| ENSP00000453502 | ST20          | 0.1500 |
| ENSP00000341324 | SRFBP1        | 0.1500 |
| ENSP00000315554 | SPEM1         | 0.1500 |
| ENSP00000354886 | SLC25A47      | 0.1500 |
| ENSP00000357199 | RRNAD1        | 0.1500 |
| ENSP00000272324 | REG3G         | 0.1500 |
| ENSP00000372105 | RBMY1E        | 0.1500 |
| ENSP00000372124 | RBMY1D        | 0.1500 |
| ENSP00000415026 | PRRT4         | 0.1500 |
| ENSP00000240189 | PRAMEF2       | 0.1500 |
| ENSP00000469432 | PKD1L2        | 0.1500 |
| ENSP00000320017 | PHYHIP        | 0.1500 |
| ENSP00000351325 | PATE2         | 0.1500 |
| ENSP00000325076 | OR10G4        | 0.1500 |
| ENSP00000389948 | NT5C3B        | 0.1500 |
| ENSP00000343891 | NLRP13        | 0.1500 |
| ENSP00000358203 | NBPF20        | 0.1500 |
| ENSP00000372202 | N6AMT2        | 0.1500 |
| ENSP00000340467 | LRRC16B       | 0.1500 |
| ENSP00000270238 | LMTK3         | 0.1500 |
| ENSP00000328444 | KRTAP4-8      | 0.1500 |
| ENSP00000334866 | KRTAP15-1     | 0.1500 |
| ENSP00000256544 | KATNBL1       | 0.1500 |
| ENSP00000308782 | GP6           | 0.1500 |
| ENSP00000313423 | GFRA4         | 0.1500 |
| ENSP00000438970 | FLJ22184      | 0.1500 |
| ENSP00000263266 | FAM83E        | 0.1500 |
| ENSP00000334285 | FAM170A       | 0.1500 |
| ENSP00000349336 | FAM163B       | 0.1500 |
| ENSP00000370812 | ESM1          | 0.1500 |
| ENSP00000303779 | EME2          | 0.1500 |
| ENSP00000263196 | DGCR2         | 0.1500 |
| ENSP00000424598 | DEFB4B        | 0.1500 |
| ENSP00000389792 | DCDC1         | 0.1500 |
| ENSP00000354028 | CYB561        | 0.1500 |
| ENSP00000469018 | CTD-3138B18.4 | 0.1500 |
| ENSP00000323978 | CRIPAK        | 0.1500 |
| ENSP00000291715 | CLDND2        | 0.1500 |
| ENSP00000433998 | CKLF-CMTM1    | 0.1500 |

|                 |                 |        |
|-----------------|-----------------|--------|
| ENSP00000415528 | CCDC81          | 0.1500 |
| ENSP00000339280 | CCDC30          | 0.1500 |
| ENSP00000379754 | CCDC125         | 0.1500 |
| ENSP00000358798 | CALHM3          | 0.1500 |
| ENSP00000316137 | C22orf43        | 0.1500 |
| ENSP00000249079 | C22orf23        | 0.1500 |
| ENSP00000252032 | C20orf194       | 0.1500 |
| ENSP00000364370 | C20orf144       | 0.1500 |
| ENSP00000354968 | C1orf191        | 0.1500 |
| ENSP00000344218 | C1orf162        | 0.1500 |
| ENSP00000298298 | C10orf25        | 0.1500 |
| ENSP00000307041 | BNC1            | 0.1500 |
| ENSP00000276416 | BIN3            | 0.1500 |
| ENSP00000363118 | ASAH2B          | 0.1500 |
| ENSP00000313513 | ANKAR           | 0.1500 |
| ENSP00000316224 | ALS2CR8         | 0.1500 |
| ENSP00000303769 | AKNA            | 0.1500 |
| ENSP00000247087 | AHDC1           | 0.1500 |
| ENSP00000365394 | MICA            | 0.1500 |
| ENSP00000437781 | ENSG00000228006 | 0.1500 |
| ENSP00000376110 | ZNF493          | 0.1474 |
| ENSP00000321370 | ZBED2           | 0.1474 |
| ENSP00000335038 | VSTM2B          | 0.1474 |
| ENSP00000342938 | UPK3BL          | 0.1474 |
| ENSP00000362562 | TMEM54          | 0.1474 |
| ENSP00000366528 | TMEM252         | 0.1474 |
| ENSP00000351732 | TMC2            | 0.1474 |
| ENSP00000366058 | SYNDIG1         | 0.1474 |
| ENSP00000424400 | SPATS1          | 0.1474 |
| ENSP00000405202 | SPANXB2         | 0.1474 |
| ENSP00000255674 | RTTN            | 0.1474 |
| ENSP00000265806 | R3HCC1          | 0.1474 |
| ENSP00000416126 | PRAP1           | 0.1474 |
| ENSP00000386359 | PPP1R1C         | 0.1474 |
| ENSP00000367655 | PKHD1L1         | 0.1474 |
| ENSP00000362987 | PHYHIPL         | 0.1474 |
| ENSP00000411439 | PATE4           | 0.1474 |
| ENSP00000248058 | OR7A10          | 0.1474 |
| ENSP00000436424 | OR4D10          | 0.1474 |
| ENSP00000350248 | OR14A16         | 0.1474 |
| ENSP00000272907 | NYAP2           | 0.1474 |
| ENSP00000274605 | N4BP3           | 0.1474 |
| ENSP00000266263 | MTFP1           | 0.1474 |
| ENSP00000321737 | MROH1           | 0.1474 |
| ENSP00000371811 | MICU2           | 0.1474 |
| ENSP00000471094 | LRRC3DN         | 0.1474 |
| ENSP00000325713 | LRRC37A3        | 0.1474 |
| ENSP00000383219 | KRTAP10-6       | 0.1474 |
| ENSP00000305263 | KRT28           | 0.1474 |
| ENSP00000356560 | KIAA1614        | 0.1474 |
| ENSP00000310338 | KIAA1551        | 0.1474 |
| ENSP00000364526 | KIAA1462        | 0.1474 |
| ENSP00000386711 | JAKMIP1         | 0.1474 |

|                 |            |        |
|-----------------|------------|--------|
| ENSP00000376824 | IFI27L1    | 0.1474 |
| ENSP00000298251 | HEPACAM    | 0.1474 |
| ENSP00000363582 | GGNBP1     | 0.1474 |
| ENSP00000265342 | FSTL4      | 0.1474 |
| ENSP00000366995 | FRMPD1     | 0.1474 |
| ENSP00000365167 | FHAD1      | 0.1474 |
| ENSP00000358820 | EPS8L3     | 0.1474 |
| ENSP00000344563 | CLEC12B    | 0.1474 |
| ENSP00000388457 | CLDND1     | 0.1474 |
| ENSP00000349971 | CEACAM3    | 0.1474 |
| ENSP00000278520 | CCDC82     | 0.1474 |
| ENSP00000297324 | C8orf48    | 0.1474 |
| ENSP00000346931 | C6orf120   | 0.1474 |
| ENSP00000310182 | C4orf32    | 0.1474 |
| ENSP00000387124 | C2orf78    | 0.1474 |
| ENSP00000388953 | C21orf37   | 0.1474 |
| ENSP00000310801 | C20orf201  | 0.1474 |
| ENSP00000420716 | C1orf228   | 0.1474 |
| ENSP00000286031 | C1orf112   | 0.1474 |
| ENSP00000415027 | C16orf96   | 0.1474 |
| ENSP00000216445 | C14orf105  | 0.1474 |
| ENSP00000261250 | C12orf4    | 0.1474 |
| ENSP00000334848 | C11orf74   | 0.1474 |
| ENSP00000359050 | C10orf76   | 0.1474 |
| ENSP00000470752 | AL117190.3 | 0.1474 |
| ENSP00000265707 | ADAM18     | 0.1474 |
| ENSP00000472832 | AC090427.1 | 0.1474 |
| ENSP00000289788 | ZSCAN23    | 0.1447 |
| ENSP00000361784 | ZNF684     | 0.1447 |
| ENSP00000320347 | ZFP3       | 0.1447 |
| ENSP00000223273 | YAE1D1     | 0.1447 |
| ENSP00000362991 | XKR8       | 0.1447 |
| ENSP00000377428 | WDR52      | 0.1447 |
| ENSP00000331062 | VSTM4      | 0.1447 |
| ENSP00000335623 | VSIG10L    | 0.1447 |
| ENSP00000344942 | UNC119B    | 0.1447 |
| ENSP00000365714 | TTYH1      | 0.1447 |
| ENSP00000335004 | TRABD2A    | 0.1447 |
| ENSP00000315635 | TMEM25     | 0.1447 |
| ENSP00000358999 | TMEM187    | 0.1447 |
| ENSP00000343635 | TLDC1      | 0.1447 |
| ENSP00000240687 | TAS2R7     | 0.1447 |
| ENSP00000332163 | SPRR4      | 0.1447 |
| ENSP00000360272 | SORBS1     | 0.1447 |
| ENSP00000339834 | SNRNP48    | 0.1447 |
| ENSP00000326445 | SHISA3     | 0.1447 |
| ENSP00000354622 | RUNDC1     | 0.1447 |
| ENSP00000276173 | RIPPLY1    | 0.1447 |
| ENSP00000438590 | RHNO1      | 0.1447 |
| ENSP00000367318 | RGP1       | 0.1447 |
| ENSP00000292125 | PSG6       | 0.1447 |
| ENSP00000335675 | PRELID2    | 0.1447 |
| ENSP00000386133 | POM121L12  | 0.1447 |

|                 |          |        |
|-----------------|----------|--------|
| ENSP00000317175 | PLEKHD1  | 0.1447 |
| ENSP00000303111 | OR5AP2   | 0.1447 |
| ENSP00000317482 | OR4F4    | 0.1447 |
| ENSP00000367664 | OR4A5    | 0.1447 |
| ENSP00000313384 | OR1E1    | 0.1447 |
| ENSP00000303151 | OR1B1    | 0.1447 |
| ENSP00000355441 | OR14A2   | 0.1447 |
| ENSP00000394546 | NHSL1    | 0.1447 |
| ENSP00000262146 | MTFR1    | 0.1447 |
| ENSP00000431287 | METTL12  | 0.1447 |
| ENSP00000367185 | LYPD5    | 0.1447 |
| ENSP00000372910 | LY6G6E   | 0.1447 |
| ENSP00000382815 | KIAA2026 | 0.1447 |
| ENSP00000244314 | IRGC     | 0.1447 |
| ENSP00000253410 | HIGD1B   | 0.1447 |
| ENSP00000364180 | GPSM3    | 0.1447 |
| ENSP00000269209 | GAREM    | 0.1447 |
| ENSP00000308591 | GAL3ST3  | 0.1447 |
| ENSP00000361413 | FIBCD1   | 0.1447 |
| ENSP00000315247 | FAM71C   | 0.1447 |
| ENSP00000360437 | FAM210B  | 0.1447 |
| ENSP00000365585 | FAM182B  | 0.1447 |
| ENSP00000267594 | FAM181A  | 0.1447 |
| ENSP00000312753 | FAM109B  | 0.1447 |
| ENSP00000307821 | FADS6    | 0.1447 |
| ENSP00000359772 | CT45A2   | 0.1447 |
| ENSP00000260988 | CRYGB    | 0.1447 |
| ENSP00000272367 | CLEC4F   | 0.1447 |
| ENSP00000329860 | CCDC172  | 0.1447 |
| ENSP00000440832 | CACFD1   | 0.1447 |
| ENSP00000349114 | C7orf76  | 0.1447 |
| ENSP00000331214 | C5orf50  | 0.1447 |
| ENSP00000195455 | C4orf6   | 0.1447 |
| ENSP00000333208 | C2orf82  | 0.1447 |
| ENSP00000315557 | C2orf57  | 0.1447 |
| ENSP00000302274 | C1QTNF4  | 0.1447 |
| ENSP00000401362 | C15orf41 | 0.1447 |
| ENSP00000353854 | C15orf39 | 0.1447 |
| ENSP00000261318 | C12orf49 | 0.1447 |
| ENSP00000311447 | ASPHD1   | 0.1447 |
| ENSP00000284142 | ASB17    | 0.1447 |
| ENSP00000301190 | ANKRD33  | 0.1447 |
| ENSP00000253109 | ANGPTL6  | 0.1447 |
| ENSP00000464976 | ZNF850   | 0.1421 |
| ENSP00000311957 | ZNF738   | 0.1421 |
| ENSP00000293725 | ZNF563   | 0.1421 |
| ENSP00000466051 | ZNF404   | 0.1421 |
| ENSP00000341528 | ZNF34    | 0.1421 |
| ENSP00000468720 | ZNF253   | 0.1421 |
| ENSP00000370447 | VCX      | 0.1421 |
| ENSP00000351157 | TXNDC15  | 0.1421 |
| ENSP00000246801 | TSKS     | 0.1421 |
| ENSP00000341031 | TPRG1    | 0.1421 |

|                 |            |        |
|-----------------|------------|--------|
| ENSP00000264728 | TMEM40     | 0.1421 |
| ENSP00000254742 | TMEM128    | 0.1421 |
| ENSP00000357811 | TEX36      | 0.1421 |
| ENSP00000341652 | TBCCD1     | 0.1421 |
| ENSP00000349459 | SPINK14    | 0.1421 |
| ENSP00000275988 | SPIN2B     | 0.1421 |
| ENSP00000244926 | SCGB1D2    | 0.1421 |
| ENSP00000344545 | SCGB1C1    | 0.1421 |
| ENSP00000293273 | RDM1       | 0.1421 |
| ENSP00000265732 | RBM48      | 0.1421 |
| ENSP00000332215 | PSG3       | 0.1421 |
| ENSP00000325638 | PRM3       | 0.1421 |
| ENSP00000359286 | PNMA3      | 0.1421 |
| ENSP00000462046 | PIRT       | 0.1421 |
| ENSP00000350474 | OR8D1      | 0.1421 |
| ENSP00000328402 | OR6C76     | 0.1421 |
| ENSP00000325682 | OR2B11     | 0.1421 |
| ENSP00000343521 | OR1J4      | 0.1421 |
| ENSP00000437910 | MTRNR2L5   | 0.1421 |
| ENSP00000334922 | KRTAP9-4   | 0.1421 |
| ENSP00000332690 | KRTAP6-1   | 0.1421 |
| ENSP00000375428 | KRTAP3-3   | 0.1421 |
| ENSP00000357304 | KIAA0907   | 0.1421 |
| ENSP00000271417 | ILDR2      | 0.1421 |
| ENSP00000279168 | GPHA2      | 0.1421 |
| ENSP00000367172 | GKN1       | 0.1421 |
| ENSP00000295092 | FAM84A     | 0.1421 |
| ENSP00000358454 | F8A3       | 0.1421 |
| ENSP00000201647 | EPS8L1     | 0.1421 |
| ENSP00000256039 | DYDC2      | 0.1421 |
| ENSP00000251250 | DTWD1      | 0.1421 |
| ENSP00000335538 | DEFB131    | 0.1421 |
| ENSP00000332723 | COLEC10    | 0.1421 |
| ENSP00000403400 | CCPG1      | 0.1421 |
| ENSP00000370658 | CCDC91     | 0.1421 |
| ENSP00000319006 | CCDC71     | 0.1421 |
| ENSP00000384416 | CCDC129    | 0.1421 |
| ENSP00000351967 | C9orf169   | 0.1421 |
| ENSP00000324741 | C7orf43    | 0.1421 |
| ENSP00000356951 | C1orf192   | 0.1421 |
| ENSP00000465432 | C19orf53   | 0.1421 |
| ENSP00000301246 | C19orf33   | 0.1421 |
| ENSP00000415662 | C17orf105  | 0.1421 |
| ENSP00000350075 | C15orf38   | 0.1421 |
| ENSP00000260723 | BTBD16     | 0.1421 |
| ENSP00000383407 | AF165138.7 | 0.1421 |
| ENSP00000350418 | ZNF98      | 0.1395 |
| ENSP00000405699 | ZNF837     | 0.1395 |
| ENSP00000471000 | ZNF616     | 0.1395 |
| ENSP00000351939 | ZNF574     | 0.1395 |
| ENSP00000223428 | ZNF510     | 0.1395 |
| ENSP00000364728 | XAGE1D     | 0.1395 |
| ENSP00000368025 | WDR87      | 0.1395 |

|                 |          |        |
|-----------------|----------|--------|
| ENSP00000416289 | WDR27    | 0.1395 |
| ENSP00000254816 | TRIM47   | 0.1395 |
| ENSP00000349296 | TMEM71   | 0.1395 |
| ENSP00000365176 | TMEM51   | 0.1395 |
| ENSP00000305533 | THAP9    | 0.1395 |
| ENSP00000385006 | THAP4    | 0.1395 |
| ENSP00000303777 | TEX13B   | 0.1395 |
| ENSP00000264659 | SRCIN1   | 0.1395 |
| ENSP00000237201 | SPACA1   | 0.1395 |
| ENSP00000355428 | SH3BP5L  | 0.1395 |
| ENSP00000424474 | SAMD14   | 0.1395 |
| ENSP00000457512 | RNF31    | 0.1395 |
| ENSP00000369341 | RFESD    | 0.1395 |
| ENSP00000358532 | RBM20    | 0.1395 |
| ENSP00000384770 | PSG4     | 0.1395 |
| ENSP00000407653 | PRR22    | 0.1395 |
| ENSP00000386166 | PRR21    | 0.1395 |
| ENSP00000319590 | PRR18    | 0.1395 |
| ENSP00000350358 | PRAMEF12 | 0.1395 |
| ENSP00000298705 | PPP1R36  | 0.1395 |
| ENSP00000383394 | POM121L7 | 0.1395 |
| ENSP00000347933 | PLGLB1   | 0.1395 |
| ENSP00000330280 | OR8B8    | 0.1395 |
| ENSP00000322435 | OR6B3    | 0.1395 |
| ENSP00000432417 | OR5M11   | 0.1395 |
| ENSP00000373196 | OR5H6    | 0.1395 |
| ENSP00000308270 | OR5B3    | 0.1395 |
| ENSP00000322088 | OR52E2   | 0.1395 |
| ENSP00000322754 | OR51S1   | 0.1395 |
| ENSP00000311688 | OR1S1    | 0.1395 |
| ENSP00000381960 | OOSP1    | 0.1395 |
| ENSP00000357402 | NKAIN2   | 0.1395 |
| ENSP00000363513 | NCMAP    | 0.1395 |
| ENSP00000338641 | MUM1L1   | 0.1395 |
| ENSP00000439985 | MTRNR2L7 | 0.1395 |
| ENSP00000361097 | MMRN2    | 0.1395 |
| ENSP00000311320 | LYG1     | 0.1395 |
| ENSP00000342711 | LY6H     | 0.1395 |
| ENSP00000373191 | LNP1     | 0.1395 |
| ENSP00000377583 | KRTAP2-4 | 0.1395 |
| ENSP00000225550 | KRT37    | 0.1395 |
| ENSP00000392204 | KLLN     | 0.1395 |
| ENSP00000298569 | KIAA1191 | 0.1395 |
| ENSP00000287275 | GLYATL2  | 0.1395 |
| ENSP00000315474 | GIMAP7   | 0.1395 |
| ENSP00000371127 | GAGE2C   | 0.1395 |
| ENSP00000308137 | FOLR1    | 0.1395 |
| ENSP00000283946 | FBXO36   | 0.1395 |
| ENSP00000420140 | FAM71F2  | 0.1395 |
| ENSP00000298784 | FAM35A   | 0.1395 |
| ENSP00000358518 | F8A2     | 0.1395 |
| ENSP00000270824 | EVA1B    | 0.1395 |
| ENSP00000391594 | ERV3-1   | 0.1395 |

|                 |              |        |
|-----------------|--------------|--------|
| ENSP00000330375 | EPGN         | 0.1395 |
| ENSP00000361001 | EFCAB14      | 0.1395 |
| ENSP00000338613 | CRYGN        | 0.1395 |
| ENSP00000362968 | CLPSL1       | 0.1395 |
| ENSP00000281129 | CEP128       | 0.1395 |
| ENSP00000371787 | CEMP1        | 0.1395 |
| ENSP00000265334 | CDKL3        | 0.1395 |
| ENSP00000351727 | CCER1        | 0.1395 |
| ENSP00000304355 | CCDC126      | 0.1395 |
| ENSP00000292574 | CCDC105      | 0.1395 |
| ENSP00000288462 | C9orf43      | 0.1395 |
| ENSP00000380380 | C9orf38      | 0.1395 |
| ENSP00000326110 | C5orf30      | 0.1395 |
| ENSP00000399392 | C3orf52      | 0.1395 |
| ENSP00000335041 | C2orf76      | 0.1395 |
| ENSP00000311218 | C1orf100     | 0.1395 |
| ENSP00000322238 | C14orf119    | 0.1395 |
| ENSP00000348337 | C13orf35     | 0.1395 |
| ENSP00000347601 | C11orf92     | 0.1395 |
| ENSP00000346600 | C11orf48     | 0.1395 |
| ENSP00000358212 | C10orf82     | 0.1395 |
| ENSP00000395461 | BTBD19       | 0.1395 |
| ENSP00000470409 | AP003062.1   | 0.1395 |
| ENSP00000272972 | ANKMY1       | 0.1395 |
| ENSP00000286190 | ALS2CR12     | 0.1395 |
| ENSP00000358932 | ABHD16B      | 0.1395 |
| ENSP00000406318 | ZNF880       | 0.1368 |
| ENSP00000399863 | ZNF839       | 0.1368 |
| ENSP00000269394 | ZNF750       | 0.1368 |
| ENSP00000268154 | ZNF710       | 0.1368 |
| ENSP00000457423 | ZNF625       | 0.1368 |
| ENSP00000302603 | ZNF556       | 0.1368 |
| ENSP00000470209 | ZNF257       | 0.1368 |
| ENSP00000447879 | ZBED6        | 0.1368 |
| ENSP00000367879 | XK           | 0.1368 |
| ENSP00000357234 | TSACC        | 0.1368 |
| ENSP00000369959 | TMEM239      | 0.1368 |
| ENSP00000364166 | TMEM225      | 0.1368 |
| ENSP00000386163 | TMEM14E      | 0.1368 |
| ENSP00000340969 | TEX264       | 0.1368 |
| ENSP00000342538 | STMN4        | 0.1368 |
| ENSP00000360913 | SPATA6       | 0.1368 |
| ENSP00000342075 | SIMC1        | 0.1368 |
| ENSP00000364865 | RP11-65D24.2 | 0.1368 |
| ENSP00000364822 | RP11-410N8.4 | 0.1368 |
| ENSP00000263765 | PRDM11       | 0.1368 |
| ENSP00000328915 | PRAMEF7      | 0.1368 |
| ENSP00000294952 | PPP1R21      | 0.1368 |
| ENSP00000396445 | OSGIN2       | 0.1368 |
| ENSP00000330338 | OR52L1       | 0.1368 |
| ENSP00000369568 | OR51B6       | 0.1368 |
| ENSP00000305469 | OR1S2        | 0.1368 |
| ENSP00000248384 | OR1E2        | 0.1368 |



|                 |                 |        |
|-----------------|-----------------|--------|
| ENSP00000366365 | OR14J1          | 0.1368 |
| ENSP00000360214 | OPALIN          | 0.1368 |
| ENSP00000329584 | ODF3L1          | 0.1368 |
| ENSP00000396080 | NUTM2D          | 0.1368 |
| ENSP00000441365 | MARVELD1        | 0.1368 |
| ENSP00000333071 | LRRC37A2        | 0.1368 |
| ENSP00000327675 | LRRC14B         | 0.1368 |
| ENSP00000358314 | LIX1L           | 0.1368 |
| ENSP00000340988 | LDLRAD2         | 0.1368 |
| ENSP00000288873 | KRTCAP3         | 0.1368 |
| ENSP00000375109 | KRTAP13-3       | 0.1368 |
| ENSP00000310573 | KRT25           | 0.1368 |
| ENSP00000257765 | KHDC1           | 0.1368 |
| ENSP00000301678 | ITFG3           | 0.1368 |
| ENSP00000368405 | GDPGP1          | 0.1368 |
| ENSP00000355444 | GCSAML          | 0.1368 |
| ENSP00000359827 | FAM73A          | 0.1368 |
| ENSP00000305596 | FAM71B          | 0.1368 |
| ENSP00000359333 | FAM69A          | 0.1368 |
| ENSP00000310057 | FAM53A          | 0.1368 |
| ENSP00000357586 | FAM26D          | 0.1368 |
| ENSP00000392452 | FAM219A         | 0.1368 |
| ENSP00000265018 | FAM184B         | 0.1368 |
| ENSP00000386657 | FAM183B         | 0.1368 |
| ENSP00000349175 | FAM180B         | 0.1368 |
| ENSP00000396593 | DYTN            | 0.1368 |
| ENSP00000312702 | DEFB114         | 0.1368 |
| ENSP00000465845 | CTB-102L5.4     | 0.1368 |
| ENSP00000349456 | CLCC1           | 0.1368 |
| ENSP00000402203 | CEACAM18        | 0.1368 |
| ENSP00000279249 | CDC42EP2        | 0.1368 |
| ENSP00000374292 | CCDC57          | 0.1368 |
| ENSP00000366173 | CBY3            | 0.1368 |
| ENSP00000335616 | C9orf47         | 0.1368 |
| ENSP00000364964 | C6orf25         | 0.1368 |
| ENSP00000371061 | C5orf51         | 0.1368 |
| ENSP00000337044 | C5orf24         | 0.1368 |
| ENSP00000413228 | C3orf55         | 0.1368 |
| ENSP00000381631 | C2orf73         | 0.1368 |
| ENSP00000419417 | C1orf52         | 0.1368 |
| ENSP00000345972 | C1orf168        | 0.1368 |
| ENSP00000396936 | C17orf72        | 0.1368 |
| ENSP00000340644 | C15orf43        | 0.1368 |
| ENSP00000321360 | C14orf177       | 0.1368 |
| ENSP00000308368 | C12orf76        | 0.1368 |
| ENSP00000341013 | AMTN            | 0.1368 |
| ENSP00000414037 | AL592170.1      | 0.1368 |
| ENSP00000440385 | AL138764.1      | 0.1368 |
| ENSP00000469716 | AC090574.1      | 0.1368 |
| ENSP00000349853 | ENSG00000197511 | 0.1368 |
| ENSP00000443539 | BRWD1-IT2       | 0.1368 |
| ENSP00000414887 | ZNF879          | 0.1342 |
| ENSP00000457715 | ZNF865          | 0.1342 |

|                 |               |        |
|-----------------|---------------|--------|
| ENSP00000392024 | ZNF844        | 0.1342 |
| ENSP00000395733 | ZNF737        | 0.1342 |
| ENSP00000347043 | ZNF649        | 0.1342 |
| ENSP00000333660 | ZNF571        | 0.1342 |
| ENSP00000324056 | ZNF48         | 0.1342 |
| ENSP00000431202 | ZNF345        | 0.1342 |
| ENSP00000367595 | TPRG1L        | 0.1342 |
| ENSP00000446264 | TMEM75        | 0.1342 |
| ENSP00000363714 | TMEM245       | 0.1342 |
| ENSP00000368737 | TMEM170B      | 0.1342 |
| ENSP00000454404 | TMEM170A      | 0.1342 |
| ENSP00000381204 | TMEM123       | 0.1342 |
| ENSP00000447731 | TMEM116       | 0.1342 |
| ENSP00000330877 | TEX40         | 0.1342 |
| ENSP00000323795 | TEX35         | 0.1342 |
| ENSP00000403925 | TBCEL         | 0.1342 |
| ENSP00000258704 | SPDYE1        | 0.1342 |
| ENSP00000417147 | SMIM7         | 0.1342 |
| ENSP00000388220 | SGK110        | 0.1342 |
| ENSP00000411948 | SAPCD1        | 0.1342 |
| ENSP00000357701 | S100A3        | 0.1342 |
| ENSP00000342780 | RP11-113D6.10 | 0.1342 |
| ENSP00000356607 | RALGPS2       | 0.1342 |
| ENSP00000367894 | PRRG1         | 0.1342 |
| ENSP00000321242 | PRNT          | 0.1342 |
| ENSP00000216446 | PLEK2         | 0.1342 |
| ENSP00000246081 | OTOR          | 0.1342 |
| ENSP00000328090 | OTOP3         | 0.1342 |
| ENSP00000367650 | OR5L2         | 0.1342 |
| ENSP00000409094 | OR52I1        | 0.1342 |
| ENSP00000319654 | OR4M1         | 0.1342 |
| ENSP00000315047 | OR4F17        | 0.1342 |
| ENSP00000347965 | OR2T6         | 0.1342 |
| ENSP00000357132 | OR10X1        | 0.1342 |
| ENSP00000309907 | NBPF14        | 0.1342 |
| ENSP00000300187 | MS4A14        | 0.1342 |
| ENSP00000388137 | MPPED1        | 0.1342 |
| ENSP00000256186 | MICALCL       | 0.1342 |
| ENSP00000360988 | LUZP4         | 0.1342 |
| ENSP00000418491 | LCN10         | 0.1342 |
| ENSP00000411198 | KRTAP4-16P    | 0.1342 |
| ENSP00000380996 | KIAA1211L     | 0.1342 |
| ENSP00000303928 | KIAA0232      | 0.1342 |
| ENSP00000370849 | ITPRIPL2      | 0.1342 |
| ENSP00000326500 | IL11RA        | 0.1342 |
| ENSP00000311528 | GPR162        | 0.1342 |
| ENSP00000373363 | GOLM1         | 0.1342 |
| ENSP00000360240 | GLYATL3       | 0.1342 |
| ENSP00000371144 | GAGE2B        | 0.1342 |
| ENSP00000346560 | FILIP1L       | 0.1342 |
| ENSP00000334430 | FAM9C         | 0.1342 |
| ENSP00000332615 | FAM169B       | 0.1342 |
| ENSP00000451998 | EML5          | 0.1342 |

|                 |                 |        |
|-----------------|-----------------|--------|
| ENSP00000335481 | EMID1           | 0.1342 |
| ENSP00000014935 | DNASE1L1        | 0.1342 |
| ENSP00000359664 | CTBS            | 0.1342 |
| ENSP00000250340 | CLEC11A         | 0.1342 |
| ENSP00000006724 | CEACAM7         | 0.1342 |
| ENSP00000308873 | CCDC74B         | 0.1342 |
| ENSP00000345470 | CCDC38          | 0.1342 |
| ENSP00000309836 | CCDC13          | 0.1342 |
| ENSP00000434593 | C8orf82         | 0.1342 |
| ENSP00000283905 | C7orf31         | 0.1342 |
| ENSP00000355735 | C6orf70         | 0.1342 |
| ENSP00000385467 | C22orf46        | 0.1342 |
| ENSP00000355840 | C1orf65         | 0.1342 |
| ENSP00000332162 | C1orf64         | 0.1342 |
| ENSP00000357511 | C1orf189        | 0.1342 |
| ENSP00000376103 | C19orf12        | 0.1342 |
| ENSP00000413728 | C12orf71        | 0.1342 |
| ENSP00000367353 | C12orf42        | 0.1342 |
| ENSP00000414687 | C11orf82        | 0.1342 |
| ENSP00000307879 | C11orf45        | 0.1342 |
| ENSP00000348751 | BTN3A2          | 0.1342 |
| ENSP00000430000 | ATXN7L3B        | 0.1342 |
| ENSP00000457539 | APOBR           | 0.1342 |
| ENSP00000384224 | AP000525.1      | 0.1342 |
| ENSP00000471799 | AL049747.1      | 0.1342 |
| ENSP00000360485 | AKAP14          | 0.1342 |
| ENSP00000396505 | AC142381.1      | 0.1342 |
| ENSP00000451382 | ENSG00000259141 | 0.1342 |
| ENSP00000410198 | ZSCAN2          | 0.1316 |
| ENSP00000351391 | ZNF781          | 0.1316 |
| ENSP00000291598 | ZNF583          | 0.1316 |
| ENSP00000261560 | ZNF430          | 0.1316 |
| ENSP00000375820 | ZNF233          | 0.1316 |
| ENSP00000251269 | ZNF221          | 0.1316 |
| ENSP00000363545 | ZDBF2           | 0.1316 |
| ENSP00000381436 | VGLL3           | 0.1316 |
| ENSP00000331298 | UBALD2          | 0.1316 |
| ENSP00000342570 | TREML4          | 0.1316 |
| ENSP00000361811 | TP53TG5         | 0.1316 |
| ENSP00000455099 | TMEM88B         | 0.1316 |
| ENSP00000374234 | TMEM72          | 0.1316 |
| ENSP00000361095 | TMEM69          | 0.1316 |
| ENSP00000348463 | TMEM236         | 0.1316 |
| ENSP00000380929 | TCP10           | 0.1316 |
| ENSP00000366875 | SPATA31A1       | 0.1316 |
| ENSP00000358599 | SMIM11P1        | 0.1316 |
| ENSP00000216471 | SAMD15          | 0.1316 |
| ENSP00000456010 | RP11-831H9.16   | 0.1316 |
| ENSP00000375397 | RNF208          | 0.1316 |
| ENSP00000340369 | RINL            | 0.1316 |
| ENSP00000237696 | RARRES1         | 0.1316 |
| ENSP00000447679 | PRR24           | 0.1316 |
| ENSP00000253008 | PRDM12          | 0.1316 |

|                 |            |        |
|-----------------|------------|--------|
| ENSP00000332134 | PRAMEF1    | 0.1316 |
| ENSP00000364295 | PQLC2      | 0.1316 |
| ENSP00000426296 | PCP4L1     | 0.1316 |
| ENSP00000301529 | OR8J3      | 0.1316 |
| ENSP00000324958 | OR4C15     | 0.1316 |
| ENSP00000339726 | OR14I1     | 0.1316 |
| ENSP00000348033 | OR11L1     | 0.1316 |
| ENSP00000307130 | OR10H3     | 0.1316 |
| ENSP00000332511 | OLFML1     | 0.1316 |
| ENSP00000371722 | NRSN2      | 0.1316 |
| ENSP00000291971 | NLRP8      | 0.1316 |
| ENSP00000374408 | MROH2A     | 0.1316 |
| ENSP00000374482 | MRGPPE     | 0.1316 |
| ENSP00000314518 | LYSMD3     | 0.1316 |
| ENSP00000404432 | LIMS3L     | 0.1316 |
| ENSP00000228799 | ITFG2      | 0.1316 |
| ENSP00000330374 | GIMAP6     | 0.1316 |
| ENSP00000386110 | GAGE2D     | 0.1316 |
| ENSP00000416935 | FOLR4      | 0.1316 |
| ENSP00000370391 | FAM9A      | 0.1316 |
| ENSP00000345029 | FAM47A     | 0.1316 |
| ENSP00000351783 | FAM222A    | 0.1316 |
| ENSP00000454591 | FAM188B2   | 0.1316 |
| ENSP00000307954 | FAM174A    | 0.1316 |
| ENSP00000413196 | FAM160A1   | 0.1316 |
| ENSP00000384604 | FAM150B    | 0.1316 |
| ENSP00000362975 | FAM13C     | 0.1316 |
| ENSP00000442304 | FAM132B    | 0.1316 |
| ENSP00000341597 | FAM114A2   | 0.1316 |
| ENSP00000472919 | ERVV-2     | 0.1316 |
| ENSP00000383396 | DEFB116    | 0.1316 |
| ENSP00000381703 | DEFB113    | 0.1316 |
| ENSP00000247306 | CTAG2      | 0.1316 |
| ENSP00000394183 | CDKN2AIPNL | 0.1316 |
| ENSP00000364501 | CD300LD    | 0.1316 |
| ENSP00000353462 | CASS4      | 0.1316 |
| ENSP00000299957 | CASC4      | 0.1316 |
| ENSP00000288502 | C9orf91    | 0.1316 |
| ENSP00000381937 | C4orf29    | 0.1316 |
| ENSP00000264434 | C2orf42    | 0.1316 |
| ENSP00000253461 | C16orf95   | 0.1316 |
| ENSP00000452773 | C15orf57   | 0.1316 |
| ENSP00000320849 | C12orf68   | 0.1316 |
| ENSP00000352992 | ART5       | 0.1316 |
| ENSP00000387907 | ANKUB1     | 0.1316 |
| ENSP00000323096 | AMIGO3     | 0.1316 |
| ENSP00000393631 | ADM5       | 0.1316 |
| ENSP00000383515 | AC002321.1 | 0.1316 |
| ENSP00000300811 | ZNF428     | 0.1289 |
| ENSP00000340132 | ZNF383     | 0.1289 |
| ENSP00000337466 | WFDC10B    | 0.1289 |
| ENSP00000403438 | TMEM150C   | 0.1289 |
| ENSP00000347195 | TMEM110    | 0.1289 |

|                 |              |        |
|-----------------|--------------|--------|
| ENSP00000378289 | SYNPO2L      | 0.1289 |
| ENSP00000363388 | SUSD1        | 0.1289 |
| ENSP00000359707 | SAMD13       | 0.1289 |
| ENSP00000326253 | RTBDN        | 0.1289 |
| ENSP00000457654 | RP11-77K12.1 | 0.1289 |
| ENSP00000402914 | RP11-685N3.1 | 0.1289 |
| ENSP00000387046 | PPM1M        | 0.1289 |
| ENSP00000379183 | PANX2        | 0.1289 |
| ENSP00000436004 | OR5M10       | 0.1289 |
| ENSP00000331572 | OR56A3       | 0.1289 |
| ENSP00000321246 | OR56A1       | 0.1289 |
| ENSP00000369729 | OR51A2       | 0.1289 |
| ENSP00000324831 | OR4P4        | 0.1289 |
| ENSP00000319322 | OR4K13       | 0.1289 |
| ENSP00000326349 | OR2G2        | 0.1289 |
| ENSP00000386209 | OR2A2        | 0.1289 |
| ENSP00000340748 | OR13H1       | 0.1289 |
| ENSP00000334115 | OR10T2       | 0.1289 |
| ENSP00000331789 | OR10J3       | 0.1289 |
| ENSP00000302437 | OR10G3       | 0.1289 |
| ENSP00000407521 | NUTM2E       | 0.1289 |
| ENSP00000333627 | NKAIN3       | 0.1289 |
| ENSP00000334998 | MT1B         | 0.1289 |
| ENSP00000344551 | MORN2        | 0.1289 |
| ENSP00000468007 | LUZP6        | 0.1289 |
| ENSP00000359204 | LPPR4        | 0.1289 |
| ENSP00000287585 | LHFPL4       | 0.1289 |
| ENSP00000470257 | hsa-mir-150  | 0.1289 |
| ENSP00000305193 | HS1BP3       | 0.1289 |
| ENSP00000429367 | FAM92A1      | 0.1289 |
| ENSP00000304078 | FAM83B       | 0.1289 |
| ENSP00000283357 | FAM81B       | 0.1289 |
| ENSP00000333394 | FAM104B      | 0.1289 |
| ENSP00000458866 | CTB-133G6.1  | 0.1289 |
| ENSP00000377470 | CNP          | 0.1289 |
| ENSP00000358491 | CMC4         | 0.1289 |
| ENSP00000466140 | CGB1         | 0.1289 |
| ENSP00000320232 | CCDC168      | 0.1289 |
| ENSP00000402239 | CCDC159      | 0.1289 |
| ENSP00000273936 | CABS1        | 0.1289 |
| ENSP00000364613 | C9orf89      | 0.1289 |
| ENSP00000216071 | C22orf31     | 0.1289 |
| ENSP00000362001 | C20orf62     | 0.1289 |
| ENSP00000371572 | C1QTNF9B     | 0.1289 |
| ENSP00000371497 | C1QTNF3      | 0.1289 |
| ENSP00000361603 | C1orf50      | 0.1289 |
| ENSP00000380960 | C17orf67     | 0.1289 |
| ENSP00000300575 | C16orf92     | 0.1289 |
| ENSP00000325144 | C15orf53     | 0.1289 |
| ENSP00000364515 | BTBD17       | 0.1289 |
| ENSP00000471539 | AC091150.1   | 0.1289 |
| ENSP00000320096 | ZNF784       | 0.1263 |
| ENSP00000346348 | ZNF774       | 0.1263 |

|                 |             |        |
|-----------------|-------------|--------|
| ENSP00000371789 | ZCCHC3      | 0.1263 |
| ENSP00000374037 | VPS9D1      | 0.1263 |
| ENSP00000250825 | VCY         | 0.1263 |
| ENSP00000386126 | UMODL1      | 0.1263 |
| ENSP00000348996 | TSGA13      | 0.1263 |
| ENSP00000411645 | TMPRSS7     | 0.1263 |
| ENSP00000331466 | TMEM95      | 0.1263 |
| ENSP00000380646 | TMEM80      | 0.1263 |
| ENSP00000364041 | SPIN2A      | 0.1263 |
| ENSP00000274432 | SPATA9      | 0.1263 |
| ENSP00000349132 | SPATA31A3   | 0.1263 |
| ENSP00000275227 | SLC18B1     | 0.1263 |
| ENSP00000312550 | SEZ6L2      | 0.1263 |
| ENSP00000463832 | RP11-41O4.1 | 0.1263 |
| ENSP00000327168 | PRR7        | 0.1263 |
| ENSP00000368199 | PGPEP1L     | 0.1263 |
| ENSP00000384801 | PCNXL4      | 0.1263 |
| ENSP00000284287 | OR8A1       | 0.1263 |
| ENSP00000347418 | OR5H2       | 0.1263 |
| ENSP00000329056 | OR4C46      | 0.1263 |
| ENSP00000324913 | OR4C16      | 0.1263 |
| ENSP00000332185 | OR2V2       | 0.1263 |
| ENSP00000339256 | NIPAL2      | 0.1263 |
| ENSP00000289749 | NBL1        | 0.1263 |
| ENSP00000375904 | LGALS16     | 0.1263 |
| ENSP00000364764 | LAYN        | 0.1263 |
| ENSP00000293525 | KRT86       | 0.1263 |
| ENSP00000370568 | KIAA1644    | 0.1263 |
| ENSP00000243213 | IL13RA2     | 0.1263 |
| ENSP00000251296 | IGSF21      | 0.1263 |
| ENSP00000366926 | IGFL4       | 0.1263 |
| ENSP00000344403 | FSIP2       | 0.1263 |
| ENSP00000264669 | FASTKD3     | 0.1263 |
| ENSP00000339681 | FAM78B      | 0.1263 |
| ENSP00000431905 | FAM71D      | 0.1263 |
| ENSP00000351345 | FAM150A     | 0.1263 |
| ENSP00000181796 | FAM107B     | 0.1263 |
| ENSP00000274217 | FAM105A     | 0.1263 |
| ENSP00000384832 | FAM104A     | 0.1263 |
| ENSP00000383398 | DEFB115     | 0.1263 |
| ENSP00000417674 | CYLC2       | 0.1263 |
| ENSP00000331556 | CYLC1       | 0.1263 |
| ENSP00000221954 | CEACAM4     | 0.1263 |
| ENSP00000224756 | CCSER2      | 0.1263 |
| ENSP00000320649 | CCDC89      | 0.1263 |
| ENSP00000258776 | C7orf69     | 0.1263 |
| ENSP00000391404 | C4orf51     | 0.1263 |
| ENSP00000445446 | C3orf33     | 0.1263 |
| ENSP00000221671 | C19orf44    | 0.1263 |
| ENSP00000386218 | C16orf3     | 0.1263 |
| ENSP00000328423 | C15orf60    | 0.1263 |
| ENSP00000381115 | C11orf93    | 0.1263 |
| ENSP00000376767 | C11orf57    | 0.1263 |

|                 |               |        |
|-----------------|---------------|--------|
| ENSP00000321464 | C10orf67      | 0.1263 |
| ENSP00000363226 | C10orf53      | 0.1263 |
| ENSP00000361776 | BEX4          | 0.1263 |
| ENSP00000315357 | ARL6IP6       | 0.1263 |
| ENSP00000376705 | ANO4          | 0.1263 |
| ENSP00000416897 | AC008394.1    | 0.1263 |
| ENSP00000407425 | SKA2L         | 0.1263 |
| ENSP00000468098 | SNHG16        | 0.1263 |
| ENSP00000384000 | ZNF681        | 0.1237 |
| ENSP00000386845 | ZNF385B       | 0.1237 |
| ENSP00000310856 | VN1R4         | 0.1237 |
| ENSP00000167106 | VASH1         | 0.1237 |
| ENSP00000373066 | TXNRD3NB      | 0.1237 |
| ENSP00000355649 | SPHAR         | 0.1237 |
| ENSP00000451866 | SMIM13        | 0.1237 |
| ENSP00000391101 | SLFN14        | 0.1237 |
| ENSP00000462754 | SLC25A52      | 0.1237 |
| ENSP00000365503 | SHISA7        | 0.1237 |
| ENSP00000457849 | RP11-613M10.8 | 0.1237 |
| ENSP00000455681 | RP11-48B14.2  | 0.1237 |
| ENSP00000467209 | RP11-125O5.2  | 0.1237 |
| ENSP00000234195 | RMDN2         | 0.1237 |
| ENSP00000379154 | RASGEF1A      | 0.1237 |
| ENSP00000259845 | PSORS1C2      | 0.1237 |
| ENSP00000438757 | PRR20C        | 0.1237 |
| ENSP00000309087 | PLAC8L1       | 0.1237 |
| ENSP00000307159 | OR8B12        | 0.1237 |
| ENSP00000303076 | OR5B2         | 0.1237 |
| ENSP00000369573 | OR51B4        | 0.1237 |
| ENSP00000332110 | OR4N5         | 0.1237 |
| ENSP00000313803 | OR3A1         | 0.1237 |
| ENSP00000355443 | OR2C3         | 0.1237 |
| ENSP00000386175 | OR2A1         | 0.1237 |
| ENSP00000363911 | OR13C5        | 0.1237 |
| ENSP00000419718 | OFCC1         | 0.1237 |
| ENSP00000365014 | NXNL2         | 0.1237 |
| ENSP00000368396 | LYRM9         | 0.1237 |
| ENSP00000361518 | LRRC73        | 0.1237 |
| ENSP00000326324 | LRRC37A       | 0.1237 |
| ENSP00000375482 | KRTAP6-3      | 0.1237 |
| ENSP00000334798 | KRT26         | 0.1237 |
| ENSP00000383630 | KIR3DL2       | 0.1237 |
| ENSP00000359219 | KAZALD1       | 0.1237 |
| ENSP00000274766 | KAAG1         | 0.1237 |
| ENSP00000329904 | IQCF2         | 0.1237 |
| ENSP00000248089 | HCFC1R1       | 0.1237 |
| ENSP00000427428 | FAM218A       | 0.1237 |
| ENSP00000349902 | FAM115C       | 0.1237 |
| ENSP00000363386 | FAM110D       | 0.1237 |
| ENSP00000366170 | CST9          | 0.1237 |
| ENSP00000293925 | CRAMP1L       | 0.1237 |
| ENSP00000430073 | CNBD1         | 0.1237 |
| ENSP00000432172 | CCDC17        | 0.1237 |

|                 |                 |        |
|-----------------|-----------------|--------|
| ENSP00000362392 | C9orf117        | 0.1237 |
| ENSP00000328069 | C6orf58         | 0.1237 |
| ENSP00000355787 | C6orf123        | 0.1237 |
| ENSP00000316457 | C20orf197       | 0.1237 |
| ENSP00000386203 | C1orf229        | 0.1237 |
| ENSP00000252453 | C19orf80        | 0.1237 |
| ENSP00000398350 | C11orf68        | 0.1237 |
| ENSP00000359018 | AKNAD1          | 0.1237 |
| ENSP00000391536 | AC021860.1      | 0.1237 |
| ENSP00000268271 | SNX29           | 0.1237 |
| ENSP00000437878 | ZNF595          | 0.1211 |
| ENSP00000413660 | ZNF492          | 0.1211 |
| ENSP00000361871 | WFDC12          | 0.1211 |
| ENSP00000378138 | TMEM98          | 0.1211 |
| ENSP00000261556 | TMEM260         | 0.1211 |
| ENSP00000356057 | TMEM181         | 0.1211 |
| ENSP00000365776 | TMC4            | 0.1211 |
| ENSP00000283547 | TEX29           | 0.1211 |
| ENSP00000334879 | SOWAHB          | 0.1211 |
| ENSP00000381895 | SMCO3           | 0.1211 |
| ENSP00000289877 | SLC45A1         | 0.1211 |
| ENSP00000357072 | SLAMF9          | 0.1211 |
| ENSP00000325776 | SERTM1          | 0.1211 |
| ENSP00000450085 | RNASEK-C17orf49 | 0.1211 |
| ENSP00000354109 | RGS22           | 0.1211 |
| ENSP00000297164 | RELL2           | 0.1211 |
| ENSP00000356828 | RCSD1           | 0.1211 |
| ENSP00000293922 | PTX4            | 0.1211 |
| ENSP00000471817 | PRED62          | 0.1211 |
| ENSP00000218230 | PCSK1N          | 0.1211 |
| ENSP00000470965 | PCDP1           | 0.1211 |
| ENSP00000332528 | OTOP2           | 0.1211 |
| ENSP00000386160 | OR52B4          | 0.1211 |
| ENSP00000325128 | OR4A16          | 0.1211 |
| ENSP00000291231 | OR3A3           | 0.1211 |
| ENSP00000366336 | OR2H1           | 0.1211 |
| ENSP00000317357 | OR13D1          | 0.1211 |
| ENSP00000363913 | OR13C3          | 0.1211 |
| ENSP00000324251 | OR10K2          | 0.1211 |
| ENSP00000364164 | OR10G9          | 0.1211 |
| ENSP00000460371 | OCLM            | 0.1211 |
| ENSP00000455442 | NUPR1L          | 0.1211 |
| ENSP00000364702 | NBPF9           | 0.1211 |
| ENSP00000299432 | MSS51           | 0.1211 |
| ENSP00000378506 | MSANTD3         | 0.1211 |
| ENSP00000300190 | MS4A5           | 0.1211 |
| ENSP00000470473 | MROH5           | 0.1211 |
| ENSP00000307513 | MRC2            | 0.1211 |
| ENSP00000344071 | METTL24         | 0.1211 |
| ENSP00000299952 | MARVELD3        | 0.1211 |
| ENSP00000318185 | LRRC42          | 0.1211 |
| ENSP00000371220 | LOH12CR2        | 0.1211 |
| ENSP00000302297 | LGI3            | 0.1211 |



|                 |            |        |
|-----------------|------------|--------|
| ENSP00000392189 | KRTAP9-3   | 0.1211 |
| ENSP00000349154 | KIAA1841   | 0.1211 |
| ENSP00000264229 | KIAA1211   | 0.1211 |
| ENSP00000454268 | KIAA1024L  | 0.1211 |
| ENSP00000300961 | JSRP1      | 0.1211 |
| ENSP00000327344 | IGIP       | 0.1211 |
| ENSP00000337014 | HFE2       | 0.1211 |
| ENSP00000406164 | GMNC       | 0.1211 |
| ENSP00000259989 | FGFBP2     | 0.1211 |
| ENSP00000367193 | FBXO48     | 0.1211 |
| ENSP00000356096 | FAM72A     | 0.1211 |
| ENSP00000342576 | FAM221A    | 0.1211 |
| ENSP00000417496 | FAM19A1    | 0.1211 |
| ENSP00000373726 | FAM159B    | 0.1211 |
| ENSP00000422293 | FAM153C    | 0.1211 |
| ENSP00000272342 | ETAA1      | 0.1211 |
| ENSP00000332806 | EMILIN3    | 0.1211 |
| ENSP00000401597 | DTHD1      | 0.1211 |
| ENSP00000372126 | DEFA1      | 0.1211 |
| ENSP00000462745 | DCAF8L2    | 0.1211 |
| ENSP00000406145 | CTXN2      | 0.1211 |
| ENSP00000379047 | CCDC51     | 0.1211 |
| ENSP00000383456 | C9orf152   | 0.1211 |
| ENSP00000259983 | C6orf52    | 0.1211 |
| ENSP00000365076 | C6orf47    | 0.1211 |
| ENSP00000380270 | C5orf28    | 0.1211 |
| ENSP00000281146 | C4orf33    | 0.1211 |
| ENSP00000424737 | C4orf21    | 0.1211 |
| ENSP00000215582 | C19orf21   | 0.1211 |
| ENSP00000465517 | C18orf21   | 0.1211 |
| ENSP00000351248 | C16orf47   | 0.1211 |
| ENSP00000348145 | C14orf178  | 0.1211 |
| ENSP00000340672 | ARMCX3     | 0.1211 |
| ENSP00000308149 | AMZ1       | 0.1211 |
| ENSP00000386846 | AC106876.2 | 0.1211 |
| ENSP00000366356 | OR5V1      | 0.1211 |
| ENSP00000420093 | NG38       | 0.1211 |
| ENSP00000293471 | ZNF613     | 0.1184 |
| ENSP00000354694 | ZNF485     | 0.1184 |
| ENSP00000382511 | ZNF195     | 0.1184 |
| ENSP00000326967 | ZNF121     | 0.1184 |
| ENSP00000305065 | ZBBX       | 0.1184 |
| ENSP00000364766 | XAGE1B     | 0.1184 |
| ENSP00000302938 | WFDC13     | 0.1184 |
| ENSP00000369798 | UCN3       | 0.1184 |
| ENSP00000451229 | TMEM253    | 0.1184 |
| ENSP00000388684 | TMEM247    | 0.1184 |
| ENSP00000372720 | TMEM241    | 0.1184 |
| ENSP00000395244 | TMEM229A   | 0.1184 |
| ENSP00000346981 | TMEM207    | 0.1184 |
| ENSP00000397843 | TMA7       | 0.1184 |
| ENSP00000374014 | TM6SF2     | 0.1184 |
| ENSP00000326841 | SPATS2     | 0.1184 |

|                 |             |        |
|-----------------|-------------|--------|
| ENSP00000319796 | SERINC4     | 0.1184 |
| ENSP00000296506 | SCRG1       | 0.1184 |
| ENSP00000318032 | RPRML       | 0.1184 |
| ENSP00000338288 | RNASE11     | 0.1184 |
| ENSP00000455434 | RD3L        | 0.1184 |
| ENSP00000321179 | RBM44       | 0.1184 |
| ENSP00000277570 | PROSER2     | 0.1184 |
| ENSP00000332034 | PROSER1     | 0.1184 |
| ENSP00000274853 | PPP1R18     | 0.1184 |
| ENSP00000350022 | OR8D2       | 0.1184 |
| ENSP00000334721 | OR6P1       | 0.1184 |
| ENSP00000329153 | OR6C70      | 0.1184 |
| ENSP00000393889 | OR5K2       | 0.1184 |
| ENSP00000322866 | OR52N5      | 0.1184 |
| ENSP00000322724 | OR51H1P     | 0.1184 |
| ENSP00000300773 | OR51B5      | 0.1184 |
| ENSP00000373136 | OR2H2       | 0.1184 |
| ENSP00000355436 | OR2AK2      | 0.1184 |
| ENSP00000360841 | OBP2A       | 0.1184 |
| ENSP00000455906 | MUC22       | 0.1184 |
| ENSP00000442159 | MTRNR2L10   | 0.1184 |
| ENSP00000339971 | MROH8       | 0.1184 |
| ENSP00000342840 | LYSMD4      | 0.1184 |
| ENSP00000239367 | LRP11       | 0.1184 |
| ENSP00000219837 | KNOP1       | 0.1184 |
| ENSP00000280020 | KIAA1328    | 0.1184 |
| ENSP00000265068 | KIAA1257    | 0.1184 |
| ENSP00000297063 | KIAA0895    | 0.1184 |
| ENSP00000307951 | HIGD2B      | 0.1184 |
| ENSP00000381473 | HIGD1C      | 0.1184 |
| ENSP00000311657 | GRAMD2      | 0.1184 |
| ENSP00000361124 | GNG5P2      | 0.1184 |
| ENSP00000365426 | GGACT       | 0.1184 |
| ENSP00000371117 | GAGE12E     | 0.1184 |
| ENSP00000367319 | FBXO47      | 0.1184 |
| ENSP00000045083 | FAM65C      | 0.1184 |
| ENSP00000351040 | FAM217B     | 0.1184 |
| ENSP00000419502 | FAM211A     | 0.1184 |
| ENSP00000409009 | FAM195B     | 0.1184 |
| ENSP00000329137 | FAM132A     | 0.1184 |
| ENSP00000364561 | FAM120AOS   | 0.1184 |
| ENSP00000315265 | DYNAP       | 0.1184 |
| ENSP00000294485 | DRAVIN      | 0.1184 |
| ENSP00000402151 | CTC-203F4.1 | 0.1184 |
| ENSP00000450461 | CEP95       | 0.1184 |
| ENSP00000382000 | CDRT15L2    | 0.1184 |
| ENSP00000359845 | CCDC160     | 0.1184 |
| ENSP00000290418 | CCDC142     | 0.1184 |
| ENSP00000346345 | C9orf163    | 0.1184 |
| ENSP00000359505 | C6orf57     | 0.1184 |
| ENSP00000415517 | C6orf10     | 0.1184 |
| ENSP00000404583 | C5orf60     | 0.1184 |
| ENSP00000303490 | C5orf34     | 0.1184 |

|                 |               |        |
|-----------------|---------------|--------|
| ENSP00000253407 | C1QL1         | 0.1184 |
| ENSP00000429399 | C1orf210      | 0.1184 |
| ENSP00000322609 | C1orf173      | 0.1184 |
| ENSP00000331363 | C19orf68      | 0.1184 |
| ENSP00000373594 | C15orf27      | 0.1184 |
| ENSP00000280325 | C11orf53      | 0.1184 |
| ENSP00000419126 | C10orf88      | 0.1184 |
| ENSP00000358067 | C10orf85      | 0.1184 |
| ENSP00000371724 | BPY2C         | 0.1184 |
| ENSP00000471635 | ARHGEF18      | 0.1184 |
| ENSP00000258749 | AOAH          | 0.1184 |
| ENSP00000455075 | AC114783.1    | 0.1184 |
| ENSP00000389658 | AC079341.1    | 0.1184 |
| ENSP00000472293 | AC026407.1    | 0.1184 |
| ENSP00000247706 | ABHD8         | 0.1184 |
| ENSP00000341274 | AAK1          | 0.1184 |
| ENSP00000246000 | FAM182A       | 0.1184 |
| ENSP00000366908 | FAM201A       | 0.1184 |
| ENSP00000307801 | ZPLD1         | 0.1158 |
| ENSP00000429266 | ZNF829        | 0.1158 |
| ENSP00000333980 | ZNF749        | 0.1158 |
| ENSP00000467889 | ZNF607        | 0.1158 |
| ENSP00000337555 | ZNF548        | 0.1158 |
| ENSP00000379464 | ZNF134        | 0.1158 |
| ENSP00000349593 | ZHX1-C8ORF76  | 0.1158 |
| ENSP00000286049 | XAGE2B        | 0.1158 |
| ENSP00000364013 | TMEFF1        | 0.1158 |
| ENSP00000215917 | SRRD          | 0.1158 |
| ENSP00000359534 | SPANXN3       | 0.1158 |
| ENSP00000226460 | SMR3A         | 0.1158 |
| ENSP00000304401 | SLFNL1        | 0.1158 |
| ENSP00000273173 | SLC22A14      | 0.1158 |
| ENSP00000401535 | RP1-130H16.18 | 0.1158 |
| ENSP00000251776 | ROPN1B        | 0.1158 |
| ENSP00000219301 | PRSS54        | 0.1158 |
| ENSP00000321691 | PDDC1         | 0.1158 |
| ENSP00000386653 | PCDH20        | 0.1158 |
| ENSP00000398729 | PAPPA-AS1     | 0.1158 |
| ENSP00000344101 | OR6N2         | 0.1158 |
| ENSP00000373193 | OR5K1         | 0.1158 |
| ENSP00000278409 | OR5F1         | 0.1158 |
| ENSP00000322784 | OR5AK2        | 0.1158 |
| ENSP00000322823 | OR52N1        | 0.1158 |
| ENSP00000333684 | OR52A1        | 0.1158 |
| ENSP00000321729 | OR51V1        | 0.1158 |
| ENSP00000323952 | OR51F2        | 0.1158 |
| ENSP00000386195 | OR4E2         | 0.1158 |
| ENSP00000302863 | OR1L3         | 0.1158 |
| ENSP00000205194 | NAT14         | 0.1158 |
| ENSP00000462879 | LYRM9         | 0.1158 |
| ENSP00000296877 | LEAP2         | 0.1158 |
| ENSP00000360696 | LCN12         | 0.1158 |
| ENSP00000255992 | KRBA1         | 0.1158 |

|                 |             |        |
|-----------------|-------------|--------|
| ENSP00000379607 | KNCN        | 0.1158 |
| ENSP00000242109 | KIAA0087    | 0.1158 |
| ENSP00000412060 | GREB1L      | 0.1158 |
| ENSP00000402962 | FKSG52      | 0.1158 |
| ENSP00000343279 | FAM83G      | 0.1158 |
| ENSP00000344331 | FAM69C      | 0.1158 |
| ENSP00000350260 | FAM219B     | 0.1158 |
| ENSP00000424007 | CTC-534A2.2 | 0.1158 |
| ENSP00000341128 | CLUL1       | 0.1158 |
| ENSP00000324767 | CHDC2       | 0.1158 |
| ENSP00000354730 | CHAMP1      | 0.1158 |
| ENSP00000005180 | CCL26       | 0.1158 |
| ENSP00000432622 | CCDC163P    | 0.1158 |
| ENSP00000358718 | CCDC147     | 0.1158 |
| ENSP00000328054 | CCDC144NL   | 0.1158 |
| ENSP00000371824 | C9orf66     | 0.1158 |
| ENSP00000395281 | C9orf116    | 0.1158 |
| ENSP00000428230 | C8orf17     | 0.1158 |
| ENSP00000292586 | C5orf45     | 0.1158 |
| ENSP00000357226 | C1orf61     | 0.1158 |
| ENSP00000380116 | C19orf55    | 0.1158 |
| ENSP00000384286 | C17orf51    | 0.1158 |
| ENSP00000369150 | C15orf59    | 0.1158 |
| ENSP00000450685 | C14orf64    | 0.1158 |
| ENSP00000318999 | C11orf16    | 0.1158 |
| ENSP00000376992 | BCL2L15     | 0.1158 |
| ENSP00000470770 | AC004466.1  | 0.1158 |
| ENSP00000359055 | NBPF4       | 0.1158 |
| ENSP00000389841 | ZNF852      | 0.1132 |
| ENSP00000310472 | ZNF624      | 0.1132 |
| ENSP00000333595 | ZNF285      | 0.1132 |
| ENSP00000389543 | TSRM        | 0.1132 |
| ENSP00000363980 | TMEM246     | 0.1132 |
| ENSP00000338164 | TMEM217     | 0.1132 |
| ENSP00000333697 | TMEM179B    | 0.1132 |
| ENSP00000264771 | TMEM175     | 0.1132 |
| ENSP00000361852 | TMCO2       | 0.1132 |
| ENSP00000456635 | TEX38       | 0.1132 |
| ENSP00000357465 | TDRD10      | 0.1132 |
| ENSP00000456026 | SMLR1       | 0.1132 |
| ENSP00000322832 | ROGDI       | 0.1132 |
| ENSP00000332530 | RNLS        | 0.1132 |
| ENSP00000334153 | RFTN1       | 0.1132 |
| ENSP00000385706 | PSG2        | 0.1132 |
| ENSP00000359378 | PRRG3       | 0.1132 |
| ENSP00000414034 | PRR26       | 0.1132 |
| ENSP00000237353 | PMFBP1      | 0.1132 |
| ENSP00000351211 | OR6C6       | 0.1132 |
| ENSP00000368989 | OR6C3       | 0.1132 |
| ENSP00000435416 | OR5M1       | 0.1132 |
| ENSP00000432011 | OR52B2      | 0.1132 |
| ENSP00000320560 | OR2D3       | 0.1132 |
| ENSP00000367219 | OR13J1      | 0.1132 |

|                 |            |        |
|-----------------|------------|--------|
| ENSP00000455068 | METRN      | 0.1132 |
| ENSP00000368964 | MAP7D2     | 0.1132 |
| ENSP00000348936 | LEKR1      | 0.1132 |
| ENSP00000367882 | LANCL3     | 0.1132 |
| ENSP00000375147 | KRTAP16-1  | 0.1132 |
| ENSP00000251643 | KRT12      | 0.1132 |
| ENSP00000346283 | HRCT1      | 0.1132 |
| ENSP00000350402 | HHLA2      | 0.1132 |
| ENSP00000337854 | HEXDC      | 0.1132 |
| ENSP00000270590 | GPR32      | 0.1132 |
| ENSP00000354645 | GPATCH3    | 0.1132 |
| ENSP00000343636 | GFRAL      | 0.1132 |
| ENSP00000359034 | FNDC7      | 0.1132 |
| ENSP00000295150 | FAM228A    | 0.1132 |
| ENSP00000343115 | FAM222B    | 0.1132 |
| ENSP00000411372 | FAM200A    | 0.1132 |
| ENSP00000227065 | FAM149A    | 0.1132 |
| ENSP00000473153 | ERVV-1     | 0.1132 |
| ENSP00000456548 | ELFN1      | 0.1132 |
| ENSP00000378312 | EFCAB5     | 0.1132 |
| ENSP00000359777 | CT45A1     | 0.1132 |
| ENSP00000357660 | CLRN3      | 0.1132 |
| ENSP00000393719 | CLEC17A    | 0.1132 |
| ENSP00000328336 | CEND1      | 0.1132 |
| ENSP00000293889 | CCDC78     | 0.1132 |
| ENSP00000277657 | CCDC7      | 0.1132 |
| ENSP00000391504 | CCDC173    | 0.1132 |
| ENSP00000373828 | CCDC154    | 0.1132 |
| ENSP00000366050 | C9orf40    | 0.1132 |
| ENSP00000391218 | C9orf173   | 0.1132 |
| ENSP00000293604 | C6orf136   | 0.1132 |
| ENSP00000264387 | C2orf83    | 0.1132 |
| ENSP00000369986 | C21orf88   | 0.1132 |
| ENSP00000356363 | C1orf53    | 0.1132 |
| ENSP00000235307 | C1orf21    | 0.1132 |
| ENSP00000390224 | C1orf132   | 0.1132 |
| ENSP00000215531 | C19orf77   | 0.1132 |
| ENSP00000401335 | C16orf90   | 0.1132 |
| ENSP00000299320 | C16orf71   | 0.1132 |
| ENSP00000324920 | C14orf39   | 0.1132 |
| ENSP00000329698 | C12orf56   | 0.1132 |
| ENSP00000406541 | C11orf21   | 0.1132 |
| ENSP00000356590 | AXDND1     | 0.1132 |
| ENSP00000390941 | ATCAY      | 0.1132 |
| ENSP00000373860 | ASPDH      | 0.1132 |
| ENSP00000409950 | ANHX       | 0.1132 |
| ENSP00000403980 | AC002365.1 | 0.1132 |
| ENSP00000412272 | ZNF503-AS2 | 0.1132 |
| ENSP00000315870 | ZNF575     | 0.1105 |
| ENSP00000354734 | WISP3      | 0.1105 |
| ENSP00000266673 | TMEM19     | 0.1105 |
| ENSP00000343799 | RNF222     | 0.1105 |
| ENSP00000398342 | PPP1R14D   | 0.1105 |

|                 |               |        |
|-----------------|---------------|--------|
| ENSP00000309233 | POMZP3        | 0.1105 |
| ENSP00000392726 | POM121L2      | 0.1105 |
| ENSP00000317818 | PIANP         | 0.1105 |
| ENSP00000380872 | PGBD4         | 0.1105 |
| ENSP00000354800 | OR5D13        | 0.1105 |
| ENSP00000349945 | OR5B17        | 0.1105 |
| ENSP00000303834 | OR5A2         | 0.1105 |
| ENSP00000321426 | OR52E4        | 0.1105 |
| ENSP00000333184 | OR4F15        | 0.1105 |
| ENSP00000341291 | OR2G6         | 0.1105 |
| ENSP00000401966 | OR1M1         | 0.1105 |
| ENSP00000459028 | OR1D5         | 0.1105 |
| ENSP00000357134 | OR10R2        | 0.1105 |
| ENSP00000310704 | OR10H5        | 0.1105 |
| ENSP00000311477 | OR10AG1       | 0.1105 |
| ENSP00000364627 | NXPE4         | 0.1105 |
| ENSP00000350377 | MCTP2         | 0.1105 |
| ENSP00000375234 | KRTAP4-9      | 0.1105 |
| ENSP00000333993 | KRTAP17-1     | 0.1105 |
| ENSP00000301656 | KRT27         | 0.1105 |
| ENSP00000431179 | KIAA0754      | 0.1105 |
| ENSP00000360829 | GLT6D1        | 0.1105 |
| ENSP00000318437 | FDCSP         | 0.1105 |
| ENSP00000422769 | DNAH10OS      | 0.1105 |
| ENSP00000330509 | DEXI          | 0.1105 |
| ENSP00000361650 | CRIP3         | 0.1105 |
| ENSP00000325301 | CDPF1         | 0.1105 |
| ENSP00000377577 | CCDC176       | 0.1105 |
| ENSP00000259229 | CCDC115       | 0.1105 |
| ENSP00000368931 | CCDC112       | 0.1105 |
| ENSP00000361556 | C9orf50       | 0.1105 |
| ENSP00000348302 | C3orf27       | 0.1105 |
| ENSP00000225805 | C17orf75      | 0.1105 |
| ENSP00000371829 | BPY2B         | 0.1105 |
| ENSP00000382673 | FAM205B       | 0.1105 |
| ENSP00000385643 | POM121L1P     | 0.1105 |
| ENSP00000353058 | ZNF517        | 0.1079 |
| ENSP00000411032 | ZNF284        | 0.1079 |
| ENSP00000331626 | ZKSCAN2       | 0.1079 |
| ENSP00000328016 | TNFAIP8L3     | 0.1079 |
| ENSP00000364502 | TMEM255B      | 0.1079 |
| ENSP00000388431 | TMEM251       | 0.1079 |
| ENSP00000290871 | TEPP          | 0.1079 |
| ENSP00000337461 | STPG1         | 0.1079 |
| ENSP00000297819 | SSMEM1        | 0.1079 |
| ENSP00000411734 | SRXN1         | 0.1079 |
| ENSP00000322640 | SPATA31E1     | 0.1079 |
| ENSP00000347153 | SPATA31A7     | 0.1079 |
| ENSP00000329825 | SPATA31A6     | 0.1079 |
| ENSP00000366847 | SPATA31A5     | 0.1079 |
| ENSP00000406957 | SPATA31A2     | 0.1079 |
| ENSP00000437635 | SLFN12L       | 0.1079 |
| ENSP00000315214 | RP11-429E11.3 | 0.1079 |

|                 |                 |        |
|-----------------|-----------------|--------|
| ENSP00000457748 | RGSL1           | 0.1079 |
| ENSP00000416033 | PROB1           | 0.1079 |
| ENSP00000235347 | PRAMEF10        | 0.1079 |
| ENSP00000164640 | PDZD4           | 0.1079 |
| ENSP00000368986 | OR6C65          | 0.1079 |
| ENSP00000327540 | OR51B2          | 0.1079 |
| ENSP00000369731 | OR51A4          | 0.1079 |
| ENSP00000316284 | OR2Z1           | 0.1079 |
| ENSP00000329210 | OR2T10          | 0.1079 |
| ENSP00000355430 | OR2T1           | 0.1079 |
| ENSP00000305055 | OR2K2           | 0.1079 |
| ENSP00000307447 | OR2AG1          | 0.1079 |
| ENSP00000386208 | OR2A5           | 0.1079 |
| ENSP00000366352 | OR11A1          | 0.1079 |
| ENSP00000445383 | OR10G2          | 0.1079 |
| ENSP00000360255 | OPN5            | 0.1079 |
| ENSP00000382804 | ODF3B           | 0.1079 |
| ENSP00000342411 | NRN1L           | 0.1079 |
| ENSP00000358372 | NBPF8           | 0.1079 |
| ENSP00000443339 | MTRNR2L3        | 0.1079 |
| ENSP00000351363 | MSMB            | 0.1079 |
| ENSP00000383578 | MGC39584        | 0.1079 |
| ENSP00000383851 | KIAA1522        | 0.1079 |
| ENSP00000242315 | KIAA1045        | 0.1079 |
| ENSP00000331385 | KIAA0825        | 0.1079 |
| ENSP00000299505 | KIAA0355        | 0.1079 |
| ENSP00000315386 | KDELC2          | 0.1079 |
| ENSP00000438895 | IZUMO3          | 0.1079 |
| ENSP00000344430 | IFITM10         | 0.1079 |
| ENSP00000192314 | GAL3ST2         | 0.1079 |
| ENSP00000360379 | FAM209A         | 0.1079 |
| ENSP00000262109 | ERICH1          | 0.1079 |
| ENSP00000313226 | CTXN1           | 0.1079 |
| ENSP00000391409 | CDHR4           | 0.1079 |
| ENSP00000359403 | CD99L2          | 0.1079 |
| ENSP00000361599 | CCDC23          | 0.1079 |
| ENSP00000457511 | CCDC179         | 0.1079 |
| ENSP00000267406 | CBLN3           | 0.1079 |
| ENSP00000382561 | C8orf22         | 0.1079 |
| ENSP00000315370 | C5orf46         | 0.1079 |
| ENSP00000366203 | C1orf127        | 0.1079 |
| ENSP00000386230 | C19orf73        | 0.1079 |
| ENSP00000463159 | C19orf47        | 0.1079 |
| ENSP00000323686 | C15orf54        | 0.1079 |
| ENSP00000362762 | BAI2            | 0.1079 |
| ENSP00000215906 | ASPHD2          | 0.1079 |
| ENSP00000457780 | AC073043.2      | 0.1079 |
| ENSP00000469046 | AC018445.1      | 0.1079 |
| ENSP00000471878 | AC005606.1      | 0.1079 |
| ENSP00000383517 | AC002321.2      | 0.1079 |
| ENSP00000426996 | ENSG00000178803 | 0.1079 |
| ENSP00000339585 | ZNF449          | 0.1053 |
| ENSP00000243938 | WFDC3           | 0.1053 |

|                 |                |        |
|-----------------|----------------|--------|
| ENSP00000275358 | VWDE           | 0.1053 |
| ENSP00000381672 | TP53TG3        | 0.1053 |
| ENSP00000375859 | TMEM91         | 0.1053 |
| ENSP00000310110 | TMEM255A       | 0.1053 |
| ENSP00000415030 | TMEM171        | 0.1053 |
| ENSP00000303999 | TMEM133        | 0.1053 |
| ENSP00000413163 | TMEM130        | 0.1053 |
| ENSP00000357425 | SMPDL3A        | 0.1053 |
| ENSP00000297307 | SLC35G3        | 0.1053 |
| ENSP00000341867 | SH2D6          | 0.1053 |
| ENSP00000426225 | RP11-542P2.1   | 0.1053 |
| ENSP00000406579 | RP11-124D2.6   | 0.1053 |
| ENSP00000295984 | PRRT3          | 0.1053 |
| ENSP00000301698 | PRR25          | 0.1053 |
| ENSP00000235349 | PRAMEF4        | 0.1053 |
| ENSP00000278855 | PLAC1L         | 0.1053 |
| ENSP00000330808 | OTOL1          | 0.1053 |
| ENSP00000342836 | OR6C74         | 0.1053 |
| ENSP00000368990 | OR6C1          | 0.1053 |
| ENSP00000341581 | OR52B6         | 0.1053 |
| ENSP00000369738 | OR51T1         | 0.1053 |
| ENSP00000345163 | OR51F1         | 0.1053 |
| ENSP00000386137 | OR2A14         | 0.1053 |
| ENSP00000323895 | OR10D3         | 0.1053 |
| ENSP00000418802 | NBPF11         | 0.1053 |
| ENSP00000293892 | MSLNL          | 0.1053 |
| ENSP00000424768 | MSANTD3-TMEFF1 | 0.1053 |
| ENSP00000311862 | MS4A10         | 0.1053 |
| ENSP00000235332 | MIIP           | 0.1053 |
| ENSP00000384640 | MGC10955       | 0.1053 |
| ENSP00000337240 | MFSD11         | 0.1053 |
| ENSP00000365261 | LST1           | 0.1053 |
| ENSP00000369702 | LHFPL2         | 0.1053 |
| ENSP00000377576 | KRTAP9-9       | 0.1053 |
| ENSP00000357008 | ITLN2          | 0.1053 |
| ENSP00000472005 | HBCBP          | 0.1053 |
| ENSP00000366628 | GPR157         | 0.1053 |
| ENSP00000358397 | FAM72B         | 0.1053 |
| ENSP00000383933 | FAM19A5        | 0.1053 |
| ENSP00000368758 | CTXN3          | 0.1053 |
| ENSP00000331784 | C7orf13        | 0.1053 |
| ENSP00000386146 | C6orf226       | 0.1053 |
| ENSP00000296847 | C6orf195       | 0.1053 |
| ENSP00000423422 | C5orf17        | 0.1053 |
| ENSP00000362743 | C2orf72        | 0.1053 |
| ENSP00000370997 | C2orf50        | 0.1053 |
| ENSP00000284881 | C21orf91       | 0.1053 |
| ENSP00000360210 | C20orf85       | 0.1053 |
| ENSP00000335285 | C1QL4          | 0.1053 |
| ENSP00000358095 | C1orf54        | 0.1053 |
| ENSP00000362133 | C1orf122       | 0.1053 |
| ENSP00000399075 | C18orf42       | 0.1053 |
| ENSP00000284245 | C16orf74       | 0.1053 |



|                 |               |        |
|-----------------|---------------|--------|
| ENSP00000386169 | C12orf61      | 0.1053 |
| ENSP00000447057 | C12orf45      | 0.1053 |
| ENSP00000417246 | C10orf128     | 0.1053 |
| ENSP00000328631 | ARMCX2        | 0.1053 |
| ENSP00000319412 | ARMC10        | 0.1053 |
| ENSP00000249116 | APOBEC3A      | 0.1053 |
| ENSP00000299415 | AC007431.1    | 0.1053 |
| ENSP00000391835 | FLJ00096      | 0.1053 |
| ENSP00000341236 | ZNF695        | 0.1026 |
| ENSP00000373278 | ZCWPW2        | 0.1026 |
| ENSP00000311343 | WDR49         | 0.1026 |
| ENSP00000357080 | VSIG8         | 0.1026 |
| ENSP00000298530 | TMEM52B       | 0.1026 |
| ENSP00000456333 | TMEM210       | 0.1026 |
| ENSP00000342169 | TEX9          | 0.1026 |
| ENSP00000265993 | TCTN3         | 0.1026 |
| ENSP00000324551 | SSUH2         | 0.1026 |
| ENSP00000424058 | SPDYE2L       | 0.1026 |
| ENSP00000366731 | SPATA31A4     | 0.1026 |
| ENSP00000454370 | SMKR1         | 0.1026 |
| ENSP00000264852 | SIDT1         | 0.1026 |
| ENSP00000435188 | RP11-831H9.11 | 0.1026 |
| ENSP00000362230 | RP11-268J15.5 | 0.1026 |
| ENSP00000382030 | RAD51AP2      | 0.1026 |
| ENSP00000319140 | PSG11         | 0.1026 |
| ENSP00000371271 | PRH2          | 0.1026 |
| ENSP00000328422 | PP13439       | 0.1026 |
| ENSP00000331643 | PGBD2         | 0.1026 |
| ENSP00000263174 | PALMD         | 0.1026 |
| ENSP00000323606 | OR6C2         | 0.1026 |
| ENSP00000323354 | OR5M8         | 0.1026 |
| ENSP00000373194 | OR5K3         | 0.1026 |
| ENSP00000321506 | OR4X1         | 0.1026 |
| ENSP00000305424 | OR1F1         | 0.1026 |
| ENSP00000354707 | OR10Z1        | 0.1026 |
| ENSP00000335596 | OR10H1        | 0.1026 |
| ENSP00000372724 | LY6G5C        | 0.1026 |
| ENSP00000297423 | KIAA0146      | 0.1026 |
| ENSP00000336861 | IQCH          | 0.1026 |
| ENSP00000453364 | HCG27         | 0.1026 |
| ENSP00000401310 | FRG2B         | 0.1026 |
| ENSP00000469038 | FLJ14816      | 0.1026 |
| ENSP00000392909 | FLJ00104      | 0.1026 |
| ENSP00000321962 | FIBIN         | 0.1026 |
| ENSP00000351632 | FAM3D         | 0.1026 |
| ENSP00000357892 | FAM24B        | 0.1026 |
| ENSP00000417581 | FAM199X       | 0.1026 |
| ENSP00000377807 | FAM122A       | 0.1026 |
| ENSP00000420075 | EFCC1         | 0.1026 |
| ENSP00000420854 | EFCAB12       | 0.1026 |
| ENSP00000331479 | CYB5D1        | 0.1026 |
| ENSP00000470478 | CTD-3088G3.8  | 0.1026 |
| ENSP00000308279 | C9orf131      | 0.1026 |

|                 |                 |        |
|-----------------|-----------------|--------|
| ENSP00000454153 | C5orf63         | 0.1026 |
| ENSP00000332875 | C2orf70         | 0.1026 |
| ENSP00000380920 | C19orf38        | 0.1026 |
| ENSP00000267485 | C14orf37        | 0.1026 |
| ENSP00000278601 | C11orf52        | 0.1026 |
| ENSP00000268314 | ARMC5           | 0.1026 |
| ENSP00000354991 | ALPK2           | 0.1026 |
| ENSP00000472412 | AC187652.1      | 0.1026 |
| ENSP00000471653 | AC018692.2      | 0.1026 |
| ENSP00000396627 | FAM157A         | 0.1026 |
| ENSP00000403609 | ENSG00000240215 | 0.1026 |
| ENSP00000468311 | MIR7-3HG        | 0.1026 |
| ENSP00000361598 | ZSWIM1          | 0.1000 |
| ENSP00000353699 | WDR72           | 0.1000 |
| ENSP00000352172 | VSIG10          | 0.1000 |
| ENSP00000311760 | TTC9B           | 0.1000 |
| ENSP00000253934 | TMEM204         | 0.1000 |
| ENSP00000320757 | TMEM150B        | 0.1000 |
| ENSP00000441459 | SDIM1           | 0.1000 |
| ENSP00000464803 | RP11-795F19.5   | 0.1000 |
| ENSP00000437523 | RP11-571M6.6    | 0.1000 |
| ENSP00000344996 | PALM3           | 0.1000 |
| ENSP00000307734 | OR6Q1           | 0.1000 |
| ENSP00000321196 | OR56B4          | 0.1000 |
| ENSP00000404102 | OR2V1           | 0.1000 |
| ENSP00000324687 | OR2T33          | 0.1000 |
| ENSP00000331774 | OR2T29          | 0.1000 |
| ENSP00000299459 | OR2D2           | 0.1000 |
| ENSP00000209540 | OR1I1           | 0.1000 |
| ENSP00000289451 | OR10K1          | 0.1000 |
| ENSP00000333593 | NXPH4           | 0.1000 |
| ENSP00000327718 | MYADML2         | 0.1000 |
| ENSP00000274897 | MLIP            | 0.1000 |
| ENSP00000280082 | MIA2            | 0.1000 |
| ENSP00000414517 | MAMLD1          | 0.1000 |
| ENSP00000334463 | LYPD6           | 0.1000 |
| ENSP00000384670 | KIAA1210        | 0.1000 |
| ENSP00000410360 | KIAA0125        | 0.1000 |
| ENSP00000293405 | IZUMO2          | 0.1000 |
| ENSP00000416095 | INE1            | 0.1000 |
| ENSP00000384183 | GATSL3          | 0.1000 |
| ENSP00000354869 | GATSL1          | 0.1000 |
| ENSP00000456337 | FLJ27352        | 0.1000 |
| ENSP00000472934 | FKSG61          | 0.1000 |
| ENSP00000360376 | FAM209B         | 0.1000 |
| ENSP00000417711 | FAM205A         | 0.1000 |
| ENSP00000329995 | FAM186A         | 0.1000 |
| ENSP00000367356 | FAM171A1        | 0.1000 |
| ENSP00000405222 | DCAF8L1         | 0.1000 |
| ENSP00000299340 | CYYR1           | 0.1000 |
| ENSP00000410400 | CT47A11         | 0.1000 |
| ENSP00000390661 | CLEC2L          | 0.1000 |
| ENSP00000294600 | CCDC27          | 0.1000 |

|                 |            |        |
|-----------------|------------|--------|
| ENSP00000357079 | CCDC19     | 0.1000 |
| ENSP00000315614 | C8orf47    | 0.1000 |
| ENSP00000338228 | C5orf56    | 0.1000 |
| ENSP00000330426 | C1QTNF8    | 0.1000 |
| ENSP00000360824 | C1orf185   | 0.1000 |
| ENSP00000355241 | C19orf45   | 0.1000 |
| ENSP00000386557 | C19orf24   | 0.1000 |
| ENSP00000321519 | C19orf18   | 0.1000 |
| ENSP00000341412 | C11orf34   | 0.1000 |
| ENSP00000361199 | C10orf99   | 0.1000 |
| ENSP00000303710 | C10orf68   | 0.1000 |
| ENSP00000339802 | ANKRD34B   | 0.1000 |
| ENSP00000469960 | AL138815.2 | 0.1000 |
| ENSP00000320396 | AL033381.1 | 0.1000 |
| ENSP00000471898 | AC099780.1 | 0.1000 |
| ENSP00000322899 | ZNF843     | 0.0974 |
| ENSP00000328397 | VMO1       | 0.0974 |
| ENSP00000262074 | TTC23      | 0.0974 |
| ENSP00000433816 | TSPAN19    | 0.0974 |
| ENSP00000356135 | TMEM81     | 0.0974 |
| ENSP00000361355 | TMEM254    | 0.0974 |
| ENSP00000331965 | TLCD2      | 0.0974 |
| ENSP00000363345 | SLC46A2    | 0.0974 |
| ENSP00000355064 | SHISA4     | 0.0974 |
| ENSP00000297354 | SBSPON     | 0.0974 |
| ENSP00000349931 | PRAMEF8    | 0.0974 |
| ENSP00000310632 | OR8S1      | 0.0974 |
| ENSP00000325078 | OR2AJ1     | 0.0974 |
| ENSP00000342697 | OR2AG2     | 0.0974 |
| ENSP00000302199 | OR10V1     | 0.0974 |
| ENSP00000314324 | OR10Q1     | 0.0974 |
| ENSP00000239614 | MSANTD2    | 0.0974 |
| ENSP00000278865 | MS4A3      | 0.0974 |
| ENSP00000382476 | MROH2B     | 0.0974 |
| ENSP00000366387 | MAMDC2     | 0.0974 |
| ENSP00000406478 | LILRB5     | 0.0974 |
| ENSP00000245620 | LILRB3     | 0.0974 |
| ENSP00000251390 | LILRA3     | 0.0974 |
| ENSP00000251377 | LILRA2     | 0.0974 |
| ENSP00000251372 | LILRA1     | 0.0974 |
| ENSP00000246070 | LAMP5      | 0.0974 |
| ENSP00000339356 | KLRG2      | 0.0974 |
| ENSP00000402153 | IQCJ       | 0.0974 |
| ENSP00000442291 | IQCC       | 0.0974 |
| ENSP00000472367 | HUG1       | 0.0974 |
| ENSP00000464833 | HSH2D      | 0.0974 |
| ENSP00000289448 | HMHB1      | 0.0974 |
| ENSP00000415299 | FAM221B    | 0.0974 |
| ENSP00000366582 | FAM196B    | 0.0974 |
| ENSP00000372290 | FAM193A    | 0.0974 |
| ENSP00000437812 | FAM106A    | 0.0974 |
| ENSP00000334501 | DMRTC1B    | 0.0974 |
| ENSP00000324025 | CGREF1     | 0.0974 |

|                 |             |        |
|-----------------|-------------|--------|
| ENSP00000376522 | CEP112      | 0.0974 |
| ENSP00000280245 | CCDC83      | 0.0974 |
| ENSP00000259870 | C6orf15     | 0.0974 |
| ENSP00000349669 | C5orf48     | 0.0974 |
| ENSP00000402915 | C2orf74     | 0.0974 |
| ENSP00000298943 | C1QL3       | 0.0974 |
| ENSP00000357082 | C1orf204    | 0.0974 |
| ENSP00000345102 | C19orf35    | 0.0974 |
| ENSP00000386452 | C17orf104   | 0.0974 |
| ENSP00000260276 | C11orf1     | 0.0974 |
| ENSP00000404304 | ARMCX4      | 0.0974 |
| ENSP00000386791 | AP000322.54 | 0.0974 |
| ENSP00000381711 | AL162389.1  | 0.0974 |
| ENSP00000472121 | AL136376.1  | 0.0974 |
| ENSP00000387081 | AC140481.2  | 0.0974 |
| ENSP00000386773 | AC013269.5  | 0.0974 |
| ENSP00000469669 | AC002985.3  | 0.0974 |
| ENSP00000329365 | ZNF730      | 0.0974 |
| ENSP00000372122 | C18orf63    | 0.0974 |
| ENSP00000322265 | ZNF620      | 0.0947 |
| ENSP00000356674 | ZBTB37      | 0.0947 |
| ENSP00000364720 | XAGE1E      | 0.0947 |
| ENSP00000364240 | UBXN10      | 0.0947 |
| ENSP00000317595 | TPPP2       | 0.0947 |
| ENSP00000369840 | TEX26       | 0.0947 |
| ENSP00000355797 | TCP10L2     | 0.0947 |
| ENSP00000335392 | SPATA12     | 0.0947 |
| ENSP00000229570 | SMIM8       | 0.0947 |
| ENSP00000320430 | S100Z       | 0.0947 |
| ENSP00000455300 | RP1-27O5.3  | 0.0947 |
| ENSP00000311398 | RNASE8      | 0.0947 |
| ENSP00000471531 | PRED57      | 0.0947 |
| ENSP00000365343 | PRAMEF3     | 0.0947 |
| ENSP00000441685 | PDZD9       | 0.0947 |
| ENSP00000346611 | OR8B3       | 0.0947 |
| ENSP00000364152 | OR8B2       | 0.0947 |
| ENSP00000304807 | OR6Y1       | 0.0947 |
| ENSP00000357127 | OR6K3       | 0.0947 |
| ENSP00000444054 | OR52E8      | 0.0947 |
| ENSP00000333196 | OR51M1      | 0.0947 |
| ENSP00000409316 | OR4F29      | 0.0947 |
| ENSP00000328934 | OR2T11      | 0.0947 |
| ENSP00000366374 | OR2J3       | 0.0947 |
| ENSP00000366372 | OR2J2       | 0.0947 |
| ENSP00000297913 | OR1Q1       | 0.0947 |
| ENSP00000306974 | OR1N1       | 0.0947 |
| ENSP00000373047 | OR12D2      | 0.0947 |
| ENSP00000333900 | OIT3        | 0.0947 |
| ENSP00000472384 | MIA         | 0.0947 |
| ENSP00000291759 | LILRA4      | 0.0947 |
| ENSP00000301202 | LAIR2       | 0.0947 |
| ENSP00000366984 | KRT40       | 0.0947 |
| ENSP00000264735 | HRASLS      | 0.0947 |

|                 |            |        |
|-----------------|------------|--------|
| ENSP00000361662 | GUCA2B     | 0.0947 |
| ENSP00000302833 | GIMAP1     | 0.0947 |
| ENSP00000360757 | FAM69B     | 0.0947 |
| ENSP00000409423 | FAM47E     | 0.0947 |
| ENSP00000265299 | FAM188B    | 0.0947 |
| ENSP00000257894 | FAM186B    | 0.0947 |
| ENSP00000398979 | CYB561A3   | 0.0947 |
| ENSP00000353013 | CLEC14A    | 0.0947 |
| ENSP00000360381 | CDCP2      | 0.0947 |
| ENSP00000333915 | CCDC42B    | 0.0947 |
| ENSP00000365169 | C9orf153   | 0.0947 |
| ENSP00000289989 | C8orf58    | 0.0947 |
| ENSP00000378601 | C8orf31    | 0.0947 |
| ENSP00000322582 | C4orf17    | 0.0947 |
| ENSP00000395549 | C22orf34   | 0.0947 |
| ENSP00000358965 | C1orf194   | 0.0947 |
| ENSP00000311390 | C16orf91   | 0.0947 |
| ENSP00000324672 | C16orf89   | 0.0947 |
| ENSP00000316898 | C12orf54   | 0.0947 |
| ENSP00000472951 | AC138517.1 | 0.0947 |
| ENSP00000472801 | AC007204.1 | 0.0947 |
| ENSP00000364382 | AAED1      | 0.0947 |
| ENSP00000409652 | ZNF766     | 0.0921 |
| ENSP00000347210 | ZNF736     | 0.0921 |
| ENSP00000447987 | ZNF727     | 0.0921 |
| ENSP00000309330 | ZNF680     | 0.0921 |
| ENSP00000318753 | WFDC11     | 0.0921 |
| ENSP00000351244 | VN1R2      | 0.0921 |
| ENSP00000368007 | TMEM240    | 0.0921 |
| ENSP00000350050 | TMEM229B   | 0.0921 |
| ENSP00000342162 | TMEM221    | 0.0921 |
| ENSP00000372192 | TMEM211    | 0.0921 |
| ENSP00000295658 | TMEM169    | 0.0921 |
| ENSP00000444736 | TAS2R30    | 0.0921 |
| ENSP00000441624 | TAS2R20    | 0.0921 |
| ENSP00000364363 | SMIM5      | 0.0921 |
| ENSP00000462106 | SMIM21     | 0.0921 |
| ENSP00000405610 | S100A7L2   | 0.0921 |
| ENSP00000287143 | PRG3       | 0.0921 |
| ENSP00000472225 | PRED58     | 0.0921 |
| ENSP00000410024 | PHGR1      | 0.0921 |
| ENSP00000397881 | PET117     | 0.0921 |
| ENSP00000303469 | OR52A5     | 0.0921 |
| ENSP00000322156 | OR51L1     | 0.0921 |
| ENSP00000321447 | OR4S1      | 0.0921 |
| ENSP00000325065 | OR4A15     | 0.0921 |
| ENSP00000366376 | OR2J1      | 0.0921 |
| ENSP00000376633 | OR2F1      | 0.0921 |
| ENSP00000420502 | OR2A7      | 0.0921 |
| ENSP00000334452 | OR13F1     | 0.0921 |
| ENSP00000259362 | OR13C9     | 0.0921 |
| ENSP00000438815 | OR13C2     | 0.0921 |
| ENSP00000449002 | OR11H12    | 0.0921 |

|                 |               |        |
|-----------------|---------------|--------|
| ENSP00000312470 | OR10A6        | 0.0921 |
| ENSP00000470526 | MGC4771       | 0.0921 |
| ENSP00000357602 | LRRC27        | 0.0921 |
| ENSP00000301219 | LILRA5        | 0.0921 |
| ENSP00000359498 | FMR1NB        | 0.0921 |
| ENSP00000242505 | FAM149B1      | 0.0921 |
| ENSP00000403396 | FAM126A       | 0.0921 |
| ENSP00000312767 | CTD-2373H9.6  | 0.0921 |
| ENSP00000262932 | CNPY4         | 0.0921 |
| ENSP00000373948 | C7orf63       | 0.0921 |
| ENSP00000364784 | C6orf48       | 0.0921 |
| ENSP00000455385 | C3orf83       | 0.0921 |
| ENSP00000294889 | C1orf115      | 0.0921 |
| ENSP00000440920 | C14orf132     | 0.0921 |
| ENSP00000359782 | BEND6         | 0.0921 |
| ENSP00000381780 | ARHGEF33      | 0.0921 |
| ENSP00000445063 | AC105052.1    | 0.0921 |
| ENSP00000443070 | LINC00273     | 0.0921 |
| ENSP00000339830 | TMEM220       | 0.0895 |
| ENSP00000457962 | TGFBR3L       | 0.0895 |
| ENSP00000334668 | SAMD7         | 0.0895 |
| ENSP00000451258 | RP11-293M10.1 | 0.0895 |
| ENSP00000313110 | OR6S1         | 0.0895 |
| ENSP00000302057 | OR5AU1        | 0.0895 |
| ENSP00000307751 | OR4X2         | 0.0895 |
| ENSP00000327525 | OR4F6         | 0.0895 |
| ENSP00000311605 | OR4B1         | 0.0895 |
| ENSP00000412752 | OR4A47        | 0.0895 |
| ENSP00000334068 | OR13C8        | 0.0895 |
| ENSP00000326718 | OR10A7        | 0.0895 |
| ENSP00000470694 | MGC4294       | 0.0895 |
| ENSP00000470117 | LUZPP1        | 0.0895 |
| ENSP00000266031 | HYAL1         | 0.0895 |
| ENSP00000377980 | HEPACAM2      | 0.0895 |
| ENSP00000317743 | HARBI1        | 0.0895 |
| ENSP00000365057 | GPANK1        | 0.0895 |
| ENSP00000295569 | FAM19A4       | 0.0895 |
| ENSP00000429896 | FAM178B       | 0.0895 |
| ENSP00000340138 | DLEU2L        | 0.0895 |
| ENSP00000367490 | DEPDC4        | 0.0895 |
| ENSP00000246020 | CSTL1         | 0.0895 |
| ENSP00000222902 | CCL24         | 0.0895 |
| ENSP00000472120 | CATX-2        | 0.0895 |
| ENSP00000318395 | C5orf64       | 0.0895 |
| ENSP00000408527 | C2orf61       | 0.0895 |
| ENSP00000327764 | C22orf26      | 0.0895 |
| ENSP00000272520 | C1QL2         | 0.0895 |
| ENSP00000437532 | C16orf93      | 0.0895 |
| ENSP00000386487 | C14orf180     | 0.0895 |
| ENSP00000229281 | C12orf57      | 0.0895 |
| ENSP00000367449 | C10orf111     | 0.0895 |
| ENSP00000361917 | ARMCX1        | 0.0895 |
| ENSP00000371968 | AC074389.6    | 0.0895 |

|                 |               |        |
|-----------------|---------------|--------|
| ENSP00000469964 | AC007461.1    | 0.0895 |
| ENSP00000332404 | TMIGD1        | 0.0868 |
| ENSP00000419712 | TMEM8C        | 0.0868 |
| ENSP00000371318 | TMEM74B       | 0.0868 |
| ENSP00000446514 | TMEM235       | 0.0868 |
| ENSP00000329794 | TCEAL7        | 0.0868 |
| ENSP00000367911 | SYCE1L        | 0.0868 |
| ENSP00000304762 | SPACA5B       | 0.0868 |
| ENSP00000372410 | RNASE13       | 0.0868 |
| ENSP00000306657 | OR5B12        | 0.0868 |
| ENSP00000362792 | OR1N2         | 0.0868 |
| ENSP00000322295 | OR10AB1P      | 0.0868 |
| ENSP00000419194 | MSMP          | 0.0868 |
| ENSP00000315626 | FAM101A       | 0.0868 |
| ENSP00000335325 | CCDC73        | 0.0868 |
| ENSP00000258214 | CCDC102A      | 0.0868 |
| ENSP00000360191 | APCDD1L       | 0.0868 |
| ENSP00000472724 | AC003043.1    | 0.0868 |
| ENSP00000447931 | ZNF878        | 0.0842 |
| ENSP00000419397 | ZNF782        | 0.0842 |
| ENSP00000471593 | ZNF728        | 0.0842 |
| ENSP00000379458 | ZNF586        | 0.0842 |
| ENSP00000313443 | ZNF491        | 0.0842 |
| ENSP00000335042 | ZNF486        | 0.0842 |
| ENSP00000403130 | TMEM233       | 0.0842 |
| ENSP00000312672 | TMEM136       | 0.0842 |
| ENSP00000361765 | TCEAL5        | 0.0842 |
| ENSP00000341988 | SPATA31D1     | 0.0842 |
| ENSP00000305847 | SPACA5        | 0.0842 |
| ENSP00000328335 | SMIM10        | 0.0842 |
| ENSP00000465978 | RP11-477N12.3 | 0.0842 |
| ENSP00000365266 | PRAMEF17      | 0.0842 |
| ENSP00000365289 | PRAMEF16      | 0.0842 |
| ENSP00000341333 | PRAMEF14      | 0.0842 |
| ENSP00000308714 | OR9Q2         | 0.0842 |
| ENSP00000302606 | OR9I1         | 0.0842 |
| ENSP00000348449 | OR8B4         | 0.0842 |
| ENSP00000335535 | OR6N1         | 0.0842 |
| ENSP00000311038 | OR6M1         | 0.0842 |
| ENSP00000357126 | OR6K6         | 0.0842 |
| ENSP00000448811 | OR6C68        | 0.0842 |
| ENSP00000279791 | OR5M9         | 0.0842 |
| ENSP00000312208 | OR5M3         | 0.0842 |
| ENSP00000335529 | OR5L1         | 0.0842 |
| ENSP00000320302 | OR5AN1        | 0.0842 |
| ENSP00000328878 | OR52E6        | 0.0842 |
| ENSP00000332473 | OR51J1        | 0.0842 |
| ENSP00000369559 | OR51I1        | 0.0842 |
| ENSP00000322593 | OR51G2        | 0.0842 |
| ENSP00000350222 | OR51D1        | 0.0842 |
| ENSP00000352305 | OR51A7        | 0.0842 |
| ENSP00000319217 | OR4L1         | 0.0842 |
| ENSP00000304077 | OR4K15        | 0.0842 |

|                 |                 |        |
|-----------------|-----------------|--------|
| ENSP00000305970 | OR4D5           | 0.0842 |
| ENSP00000330904 | OR2T34          | 0.0842 |
| ENSP00000323423 | OR2AP1          | 0.0842 |
| ENSP00000306607 | OR1L8           | 0.0842 |
| ENSP00000259466 | OR1L4           | 0.0842 |
| ENSP00000318834 | OR10H4          | 0.0842 |
| ENSP00000389072 | OR10G8          | 0.0842 |
| ENSP00000358228 | NBPF24          | 0.0842 |
| ENSP00000356733 | MROH9           | 0.0842 |
| ENSP00000381857 | MROH6           | 0.0842 |
| ENSP00000319388 | MAMDC4          | 0.0842 |
| ENSP00000389760 | GATS            | 0.0842 |
| ENSP00000363529 | FAM83C          | 0.0842 |
| ENSP00000273146 | FAM198A         | 0.0842 |
| ENSP00000420174 | ERVFRD-1        | 0.0842 |
| ENSP00000269720 | CTB-55O6.8      | 0.0842 |
| ENSP00000421868 | CCDC169-SOHLH2  | 0.0842 |
| ENSP00000360682 | C9orf142        | 0.0842 |
| ENSP00000335500 | C7orf57         | 0.0842 |
| ENSP00000368623 | C1orf159        | 0.0842 |
| ENSP00000382318 | C14orf23        | 0.0842 |
| ENSP00000386960 | C10orf55        | 0.0842 |
| ENSP00000394705 | AL353791.1      | 0.0842 |
| ENSP00000472130 | AL161784.1      | 0.0842 |
| ENSP00000469538 | AC104057.1      | 0.0842 |
| ENSP00000469305 | AC093323.1      | 0.0842 |
| ENSP00000349693 | ENSG00000197426 | 0.0842 |
| ENSP00000374049 | VWA3A           | 0.0816 |
| ENSP00000256362 | VRTN            | 0.0816 |
| ENSP00000257637 | TMEM243         | 0.0816 |
| ENSP00000428459 | TMEM200B        | 0.0816 |
| ENSP00000380858 | ST7-OT4         | 0.0816 |
| ENSP00000469270 | SBP1            | 0.0816 |
| ENSP00000465021 | RP11-127I20.4   | 0.0816 |
| ENSP00000306324 | PWWP2B          | 0.0816 |
| ENSP00000328768 | PRR23B          | 0.0816 |
| ENSP00000347211 | PRAMEF6         | 0.0816 |
| ENSP00000365302 | PRAMEF13        | 0.0816 |
| ENSP00000334934 | OR9Q1           | 0.0816 |
| ENSP00000307598 | OR9K2           | 0.0816 |
| ENSP00000377799 | OR6C4           | 0.0816 |
| ENSP00000373195 | OR5H15          | 0.0816 |
| ENSP00000362784 | OR5C1           | 0.0816 |
| ENSP00000319197 | OR4K17          | 0.0816 |
| ENSP00000347428 | OR2L5           | 0.0816 |
| ENSP00000449598 | MYRFL           | 0.0816 |
| ENSP00000330612 | MRGPRG          | 0.0816 |
| ENSP00000305138 | FAM195A         | 0.0816 |
| ENSP00000395340 | FAM185A         | 0.0816 |
| ENSP00000419539 | CTAGE4          | 0.0816 |
| ENSP00000424711 | CLRN2           | 0.0816 |
| ENSP00000469474 | CCDC177         | 0.0816 |
| ENSP00000386450 | C7orf34         | 0.0816 |



|                 |               |        |
|-----------------|---------------|--------|
| ENSP00000347322 | C6orf89       | 0.0816 |
| ENSP00000372651 | C3orf72       | 0.0816 |
| ENSP00000471714 | AC068620.1    | 0.0816 |
| ENSP00000302657 | ABHD15        | 0.0816 |
| ENSP00000301665 | TMEM99        | 0.0789 |
| ENSP00000279396 | TMEM219       | 0.0789 |
| ENSP00000383270 | SMIM2         | 0.0789 |
| ENSP00000323928 | OR8H3         | 0.0789 |
| ENSP00000437629 | OR6J1         | 0.0789 |
| ENSP00000401706 | OR5H14        | 0.0789 |
| ENSP00000346575 | OR5H1         | 0.0789 |
| ENSP00000335025 | OR5D18        | 0.0789 |
| ENSP00000348368 | OR52R1        | 0.0789 |
| ENSP00000386180 | OR3A2         | 0.0789 |
| ENSP00000352604 | OR2T3         | 0.0789 |
| ENSP00000326301 | OR2G3         | 0.0789 |
| ENSP00000299454 | OR10A5        | 0.0789 |
| ENSP00000300226 | MS4A8         | 0.0789 |
| ENSP00000359404 | KIAA1107      | 0.0789 |
| ENSP00000338532 | FAM53B        | 0.0789 |
| ENSP00000357588 | FAM26E        | 0.0789 |
| ENSP00000407749 | FAM25G        | 0.0789 |
| ENSP00000464272 | FAM25E        | 0.0789 |
| ENSP00000341481 | FAM25C        | 0.0789 |
| ENSP00000413896 | FAM25B        | 0.0789 |
| ENSP00000342790 | FAM25A        | 0.0789 |
| ENSP00000342336 | FAM180A       | 0.0789 |
| ENSP00000297203 | C7orf62       | 0.0789 |
| ENSP00000373575 | C6orf163      | 0.0789 |
| ENSP00000330267 | C15orf32      | 0.0789 |
| ENSP00000459753 | AC027763.2    | 0.0789 |
| ENSP00000380480 | ZNF891        | 0.0763 |
| ENSP00000410545 | ZNF814        | 0.0763 |
| ENSP00000395629 | ZNF812        | 0.0763 |
| ENSP00000342021 | ZNF788        | 0.0763 |
| ENSP00000473243 | ZNF788        | 0.0763 |
| ENSP00000394248 | ZNF716        | 0.0763 |
| ENSP00000411132 | ZNF619        | 0.0763 |
| ENSP00000465960 | ZNF585B       | 0.0763 |
| ENSP00000472277 | ZNF548        | 0.0763 |
| ENSP00000282282 | ZNF547        | 0.0763 |
| ENSP00000468271 | ZFP112        | 0.0763 |
| ENSP00000311122 | TMEM52        | 0.0763 |
| ENSP00000380671 | SMCO1         | 0.0763 |
| ENSP00000456213 | RP4-734P14.4  | 0.0763 |
| ENSP00000454561 | RP11-122A3.2  | 0.0763 |
| ENSP00000353537 | OR5B21        | 0.0763 |
| ENSP00000334418 | OR4C12        | 0.0763 |
| ENSP00000324583 | OR2T12        | 0.0763 |
| ENSP00000313833 | LCN15         | 0.0763 |
| ENSP00000373254 | KRBOX1        | 0.0763 |
| ENSP00000359978 | HHLA3         | 0.0763 |
| ENSP00000468743 | CTD-3116E22.4 | 0.0763 |

|                 |                 |        |
|-----------------|-----------------|--------|
| ENSP00000471607 | CTD-3105H18.18  | 0.0763 |
| ENSP00000471613 | CTD-3105H18.16  | 0.0763 |
| ENSP00000473166 | CTD-2561J22.3   | 0.0763 |
| ENSP00000473043 | CTD-2192J16.20  | 0.0763 |
| ENSP00000466387 | CTC-398G3.6     | 0.0763 |
| ENSP00000455948 | CLEC19A         | 0.0763 |
| ENSP00000342445 | CLDN4           | 0.0763 |
| ENSP00000369431 | CAAP1           | 0.0763 |
| ENSP00000450114 | C14orf79        | 0.0763 |
| ENSP00000357356 | AL603926.1      | 0.0763 |
| ENSP00000441995 | AC073343.1      | 0.0763 |
| ENSP00000472160 | AC003006.7      | 0.0763 |
| ENSP00000321812 | ZNF776          | 0.0737 |
| ENSP00000472894 | ZNF547          | 0.0737 |
| ENSP00000237275 | ZC2HC1B         | 0.0737 |
| ENSP00000343366 | VSTM1           | 0.0737 |
| ENSP00000301057 | TP53I13         | 0.0737 |
| ENSP00000421652 | RP11-1396O13.13 | 0.0737 |
| ENSP00000275275 | PNLDC1          | 0.0737 |
| ENSP00000448789 | OR9A4           | 0.0737 |
| ENSP00000316518 | OR9A2           | 0.0737 |
| ENSP00000318956 | OR52K2          | 0.0737 |
| ENSP00000302422 | OR52K1          | 0.0737 |
| ENSP00000394047 | CTD-3105H18.14  | 0.0737 |
| ENSP00000458124 | CTD-2006C1.10   | 0.0737 |
| ENSP00000438285 | CCDC177         | 0.0737 |
| ENSP00000343171 | C2orf80         | 0.0737 |
| ENSP00000305875 | C20orf196       | 0.0737 |
| ENSP00000341787 | BTNL3           | 0.0737 |
| ENSP00000471857 | AC096677.1      | 0.0737 |
| ENSP00000455659 | AC002310.13     | 0.0737 |
| ENSP00000383873 | TTC34           | 0.0711 |
| ENSP00000384370 | STEAP1B         | 0.0711 |
| ENSP00000463047 | RP11-111H3.1    | 0.0711 |
| ENSP00000375562 | RBM12B-AS1      | 0.0711 |
| ENSP00000419944 | PXT1            | 0.0711 |
| ENSP00000352626 | OR6K2           | 0.0711 |
| ENSP00000399627 | LCN6            | 0.0711 |
| ENSP00000334072 | TMEM212         | 0.0684 |
| ENSP00000432353 | PBOV1           | 0.0684 |
| ENSP00000322546 | OR51G1          | 0.0684 |
| ENSP00000386143 | HEPN1           | 0.0684 |
| ENSP00000383682 | FAM72D          | 0.0684 |
| ENSP00000387298 | ERICH2          | 0.0684 |
| ENSP00000367926 | CXorf30         | 0.0684 |
| ENSP00000369963 | C20orf141       | 0.0684 |
| ENSP00000361463 | AL391421.1      | 0.0684 |
| ENSP00000446137 | AL360154.1      | 0.0684 |
| ENSP00000419119 | OR10C1          | 0.0658 |
| ENSP00000393556 | FLJ20373        | 0.0658 |
| ENSP00000382675 | ENHO            | 0.0658 |
| ENSP00000355752 | C1orf95         | 0.0658 |
| ENSP00000359401 | C1orf146        | 0.0658 |

|                 |            |        |
|-----------------|------------|--------|
| ENSP00000416549 | AC109135.1 | 0.0658 |
| ENSP00000394653 | IQCF5      | 0.0632 |
| ENSP00000360166 | CXorf64    | 0.0632 |
| ENSP00000382026 | C4orf3     | 0.0632 |
| ENSP00000248984 | C22orf24   | 0.0632 |
| ENSP00000371529 | C22orf42   | 0.0605 |
| ENSP00000384683 | RNASE9     | 0.0553 |
